# Supplementary material for: Modelling the morphology and thermomechanical behaviour of low-bandgap conjugated polymers and bulk heterojunction films
Source: Royal Society of Chemistry journal article supplement (doi:10.1039/c6ee03456j), 2016-12-19
Supplement: c6ee03456j2.data [file c6ee03456j2.data]

LAMMPS data file via write_data, version 16 Feb 2016, timestep = 5000000

1178 atoms
21 atom types
1237 bonds
29 bond types
2376 angles
56 angle types
3608 dihedrals
85 dihedral types
288 impropers
18 improper types

0.0000000000000000e+00 2.8000000000000000e+02 xlo xhi
0.0000000000000000e+00 2.8000000000000000e+02 ylo yhi
0.0000000000000000e+00 2.8000000000000000e+02 zlo zhi

Masses

1 32.06
2 12.011
3 12.011
4 28.086
5 12.011
6 12.011
7 1.008
8 12.011
9 1.008
10 12.011
11 12.011
12 12.011
13 32.06
14 12.011
15 12.011
16 12.011
17 14.007
18 15.999
19 12.011
20 1.008
21 1.008

Pair Coeffs # lj/cut/coul/long

1 0.25 3.55
2 0.07 3.55
3 0.07 3.55
4 0.1 4
5 0.07 3.55
6 0.07 3.55
7 0.03 2.42
8 0.07 3.55
9 0.03 2.5
10 0.066 3.5
11 0.066 3.5
12 0.066 3.5
13 0.25 3.55
14 0.07 3.55
15 0.07 3.55
16 0.07 3.55
17 0.17 3.25
18 0.21 2.96
19 0.066 3.5
20 0.03 2.42
21 0.03 2.42

Bond Coeffs # harmonic

1 250 1.765
2 250 1.739
3 546 1.386
4 367 1.08
5 546 1.417
6 367 1.08
7 236 1.895
8 187 1.908
9 546 1.393
10 546 1.448
11 396.8 1.441
12 340 1.09
13 268 1.529
14 340 1.09
15 268 1.529
16 340 1.09
17 268 1.529
18 340 1.09
19 268 1.529
20 250 1.773
21 546 1.377
22 447 1.479
23 546 1.426
24 447 1.407
25 570 1.221
26 337 1.46
27 340 1.09
28 268 1.529
29 367 1.08

Angle Coeffs # harmonic

1 74 91.1
2 70 110.4
3 35 125
4 35 125
5 70 114.4
6 35 125
7 35 125
8 70 91
9 60 110
10 50 112.7
11 70 112.6
12 70 136
13 70 116.8
14 70 140.8
15 70 111.5
16 70 107.7
17 70 128
18 70 121.6
19 35 109.5
20 60 112
21 33 107.8
22 37.5 110.7
23 37.5 110.7
24 58.35 112.7
25 37.5 110.7
26 58.35 112.7
27 37.5 110.7
28 58.35 112.7
29 33 107.8
30 37.5 110.7
31 37.5 110.7
32 33 107.8
33 58.35 112.7
34 37.5 110.7
35 58.35 112.7
36 58.35 112.7
37 74 94
38 70 120
39 70 128
40 70 107.9
41 70 136.8
42 70 115.1
43 70 108.2
44 70 105.2
45 80 130.2
46 80 124.5
47 70 113.1
48 50 123.5
49 35 109.5
50 37.5 107
51 33 107.8
52 37.5 110.7
53 37.5 110.7
54 58.35 112.7
55 35 125
56 35 127.1

Dihedral Coeffs # opls

1 0 3.05 0 0
2 0 3.05 0 0
3 0 3.05 0 0
4 0 3.05 0 0
5 0 7.25 0 0
6 0 7.25 0 0
7 0 7.25 0 0
8 0 7.25 0 0
9 0 7.25 0 0
10 0 7.25 0 0
11 0 7.25 0 0
12 0 7.25 0 0
13 0 3.05 0 0
14 0 3.05 0 0
15 0 0 0.3 0
16 0 0 0.3 0
17 0 0 0 0
18 0 0 0 0
19 0 0 0 0
20 0 0 0 0
21 0 7.25 0 0
22 0 7.25 0 0
23 0 7.25 0 0
24 0 7.25 0 0
25 0 7.25 0 0
26 0 7.25 0 0
27 0 7.25 0 0
28 0 3.05 0 0
29 0 7.25 0 0
30 0 7.25 0 0
31 0 0 0 0
32 -1.577 5.877 0.968 0.06
33 0 0 0 0
34 0 0 0 0
35 0 0 0.3 0
36 1.3 -0.05 0.2 0
37 0 0 0.3 0
38 0 0 0.3 0
39 0 0 0.3 0
40 1.3 -0.05 0.2 0
41 0 0 0.3 0
42 0 0 0.3 0
43 0 0 0.3 0
44 1.3 -0.05 0.2 0
45 1.3 -0.05 0.2 0
46 0 0 0.3 0
47 1.3 -0.05 0.2 0
48 0 0 0.3 0
49 0 0 0.3 0
50 0 0 0.3 0
51 1.3 -0.05 0.2 0
52 0 0 0.3 0
53 0 0 0.3 0
54 1.3 -0.05 0.2 0
55 0 0 0.3 0
56 0 0 0.3 0
57 0 3.05 0 0
58 0 3.05 0 0
59 0 7.25 0 0
60 0 7.25 0 0
61 0 7.25 0 0
62 0 7.25 0 0
63 0 7.25 0 0
64 0 7.25 0 0
65 0 7.25 0 0
66 0 7.25 0 0
67 0 7.25 0 0
68 0 7.25 0 0
69 0 7.25 0 0
70 0 6.089 0 0
71 0 6.089 0 0
72 0 6.089 0 0
73 0 6.089 0 0
74 0 0 0 0
75 0 0.462 0 0
76 0 0 0.3 0
77 1.3 -0.05 0.2 0
78 0 0 0.3 0
79 0 0 0.3 0
80 0 0 0.3 0
81 1.3 -0.05 0.2 0
82 1.3 -0.05 0.2 0
83 0 3.05 0 0
84 0 7.25 0 0
85 0 7.25 0 0

Improper Coeffs # cvff

1 0.8335 -1 2
2 0.8335 -1 2
3 0.8335 -1 2
4 0.8335 -1 2
5 0.8335 -1 2
6 0.8335 -1 2
7 0.8335 -1 2
8 0.8335 -1 2
9 0.8335 -1 2
10 0.8335 -1 2
11 0.8335 -1 2
12 0.8335 -1 2
13 3.5 -1 2
14 3.5 -1 2
15 3.5 -1 2
16 3.5 -1 2
17 3.5 -1 2
18 3.5 -1 2

Atoms # full

429 1 9 5.9999999999999998e-02 1.6865433770810256e+02 2.3165632501366400e+02 6.7469519039374276e+01 0 -1 0
430 1 9 5.9999999999999998e-02 1.6925061399988891e+02 2.3005248118928162e+02 6.7901444499127507e+01 0 -1 0
428 1 9 5.9999999999999998e-02 1.6876602536264383e+02 2.3037044967680177e+02 6.6282082191848616e+01 0 -1 0
427 1 12 -1.7999999999999999e-01 1.6927370825590046e+02 2.3082499417920016e+02 6.7132815629047371e+01 0 -1 0
423 1 9 5.9999999999999998e-02 1.7040414616198635e+02 2.3220960141002382e+02 6.8887786156467129e+01 0 -1 0
425 1 9 5.9999999999999998e-02 1.7077737665938085e+02 2.3219722232085763e+02 6.6190153931980120e+01 0 -1 0
424 1 11 -1.2000000000000000e-01 1.7076910454635410e+02 2.3133678942283805e+02 6.6859248072569187e+01 0 -1 0
421 1 11 -1.2000000000000000e-01 1.7122799482578034e+02 2.3184654020988026e+02 6.8273327085212117e+01 0 -1 0
426 1 9 5.9999999999999998e-02 1.7141679594517029e+02 2.3053429217709044e+02 6.6506269005700190e+01 0 -1 0
367 1 18 -4.8999999999999999e-01 1.6482337939004444e+02 2.2802219981697019e+02 7.1851557464426037e+01 0 -1 0
369 1 9 5.9999999999999998e-02 1.6375759497128647e+02 2.2568540348022725e+02 7.2193348125967830e+01 0 -1 0
370 1 9 5.9999999999999998e-02 1.6215070342574202e+02 2.2551934006166044e+02 7.2981644168915949e+01 0 -1 0
368 1 19 8.9999999999999997e-02 1.6311800399870265e+02 2.2602098053459278e+02 7.3009688397009683e+01 0 -1 0
362 1 17 -3.9700000000000002e-01 1.6283637205158800e+02 2.2741290128589310e+02 7.2924538557827645e+01 0 -1 0
365 1 16 6.2900000000000000e-01 1.6379826352592946e+02 2.2829804038224120e+02 7.2432475308345659e+01 0 -1 0
364 1 15 -2.2200000000000000e-01 1.6329729123988366e+02 2.2960346476786896e+02 7.2888513488795454e+01 0 -1 0
363 1 14 1.5300000000000000e-01 1.6385074167941403e+02 2.3086324507776467e+02 7.2859093592785882e+01 0 -1 0
408 1 9 5.9999999999999998e-02 1.6947146801671386e+02 2.3014937663710168e+02 7.0363908047951668e+01 0 -1 0
406 1 8 4.4400000000000002e-02 1.7023697320453275e+02 2.3035229138788137e+02 7.1112858948672212e+01 0 -1 0
404 1 7 1.4210000000000000e-01 1.6624880201712489e+02 2.2958948894419458e+02 7.2779233905449644e+01 0 -1 0
395 1 3 -1.3239999999999999e-01 1.6626080068522549e+02 2.3059983995344436e+02 7.2397858932395835e+01 0 -1 0
396 1 4 1.7790000000000000e-01 1.6937990591860608e+02 2.3111455216529956e+02 7.2735978086173631e+01 0 -1 0
431 1 8 4.4400000000000002e-02 1.6960866001199383e+02 2.3010775974919773e+02 7.4366634364089094e+01 0 -1 0
433 1 9 5.9999999999999998e-02 1.6889997351304419e+02 2.2927981317439807e+02 7.4347453584207699e+01 0 -1 0
432 1 9 5.9999999999999998e-02 1.7058710241139286e+02 2.2966484655053296e+02 7.4552586964342225e+01 0 -1 0
407 1 9 5.9999999999999998e-02 1.7042008890124276e+02 2.2928994172216923e+02 7.1274047845013953e+01 0 -1 0
420 1 9 5.9999999999999998e-02 1.7147554622577292e+02 2.2980764798413705e+02 6.9016552113516596e+01 0 -1 0
412 1 9 5.9999999999999998e-02 1.7290657299303612e+02 2.2975187232409030e+02 7.1858958352471063e+01 0 -1 0
411 1 11 -1.2000000000000000e-01 1.7257771270192899e+02 2.3078474574156922e+02 7.1744400614439499e+01 0 -1 0
413 1 9 5.9999999999999998e-02 1.7223514069643772e+02 2.3098199246963341e+02 7.2760194959420545e+01 0 -1 0
422 1 9 5.9999999999999998e-02 1.7193697989262512e+02 2.3267198945649503e+02 6.8209501357279464e+01 0 -1 0
410 1 9 5.9999999999999998e-02 1.7124491181559321e+02 2.3218810184666347e+02 7.0838858495662890e+01 0 -1 0
393 1 1 -4.7300000000000002e-02 1.6562935988010361e+02 2.3304558449322954e+02 7.2070670661945186e+01 0 -1 0
394 1 2 -5.7599999999999998e-02 1.6516703353738205e+02 2.3140700998879427e+02 7.2444009505779576e+01 0 -1 0
398 1 6 -1.8620000000000000e-01 1.6749950255399696e+02 2.3139012616765143e+02 7.2436203397848942e+01 0 -1 0
397 1 5 1.1110000000000000e-01 1.6730342643596649e+02 2.3274143088779758e+02 7.2262445576584454e+01 0 -1 0
402 1 5 1.1110000000000000e-01 1.6837266005609152e+02 2.3357245686178291e+02 7.2586085340721155e+01 0 -1 0
403 1 6 -1.8620000000000000e-01 1.6956757101162222e+02 2.3294528032986787e+02 7.2940126987713782e+01 0 -1 0
399 1 1 -4.7300000000000002e-02 1.6851517476504480e+02 2.3529829534595876e+02 7.2806285438543469e+01 0 -1 0
401 1 3 -1.3239999999999999e-01 1.7057528457545183e+02 2.3377373035052400e+02 7.3368382470114256e+01 0 -1 0
400 1 2 -5.7599999999999998e-02 1.7011199092619344e+02 2.3507692982650991e+02 7.3451473367368308e+01 0 -1 0
419 1 9 5.9999999999999998e-02 1.7296325661843744e+02 2.3088910882627067e+02 6.9060515340076549e+01 0 -1 0
418 1 11 -1.2000000000000000e-01 1.7188900033322926e+02 2.3079553228387306e+02 6.9219629225026807e+01 0 -1 0
409 1 10 -5.9999999999999998e-02 1.7146188122172904e+02 2.3113189756873206e+02 7.0679306622967999e+01 0 -1 0
417 1 9 5.9999999999999998e-02 1.7410917320173721e+02 2.3175979789235825e+02 7.0575079115522215e+01 0 -1 0
416 1 9 5.9999999999999998e-02 1.7336900925700266e+02 2.3274677574811767e+02 7.1953145887627670e+01 0 -1 0
414 1 12 -1.7999999999999999e-01 1.7370673083920369e+02 2.3177690230422823e+02 7.1587920445951127e+01 0 -1 0
415 1 9 5.9999999999999998e-02 1.7464538217663826e+02 2.3154059396273999e+02 7.2089111062687508e+01 0 -1 0
405 1 7 1.4210000000000000e-01 1.7153781417967434e+02 2.3344148648144372e+02 7.3728314092028668e+01 0 -1 0
195 1 9 5.9999999999999998e-02 1.4819011025949266e+02 2.4609923471489248e+02 7.3168759659722923e+01 0 -1 0
193 1 12 -1.7999999999999999e-01 1.4852038441056030e+02 2.4614278354106617e+02 7.4206604796654076e+01 0 -1 0
196 1 9 5.9999999999999998e-02 1.4933494787033933e+02 2.4686474086437903e+02 7.4264604820162759e+01 0 -1 0
194 1 9 5.9999999999999998e-02 1.4765907370539588e+02 2.4649250409616744e+02 7.4775761926421353e+01 0 -1 0
1043 1 9 5.9999999999999998e-02 1.5719631820968425e+02 2.4747350656773216e+02 7.3548859918331743e+01 0 -1 0
1042 1 9 5.9999999999999998e-02 1.5545829598304451e+02 2.4703007387045372e+02 7.3557814526735783e+01 0 -1 0
1040 1 12 -1.7999999999999999e-01 1.5639603483557994e+02 2.4699370075777301e+02 7.4112271776520416e+01 0 -1 0
1041 1 9 5.9999999999999998e-02 1.5656303798737358e+02 2.4591668286304588e+02 7.4127842379151630e+01 0 -1 0
957 1 9 5.9999999999999998e-02 1.4856634031104358e+02 2.5363195800094161e+02 7.4953107847383521e+01 0 -1 0
1012 1 11 -1.2000000000000000e-01 1.5558624383761574e+02 2.5668523630853196e+02 7.3154864039962689e+01 0 -1 0
1014 1 9 5.9999999999999998e-02 1.5518725168892166e+02 2.5632895267706965e+02 7.4104583598181520e+01 0 -1 0
1016 1 9 5.9999999999999998e-02 1.5487409356341470e+02 2.5841205720118751e+02 7.1906263943726799e+01 0 -1 0
1008 1 9 5.9999999999999998e-02 1.5780330006630550e+02 2.5524432384744580e+02 7.3030024953929157e+01 0 -1 0
1006 1 11 -1.2000000000000000e-01 1.5808799968259663e+02 2.5601523730683147e+02 7.3746082810562228e+01 0 -1 0
1013 1 9 5.9999999999999998e-02 1.5560081419663317e+02 2.5581422541389216e+02 7.2499709307204910e+01 0 -1 0
1009 1 11 -1.2000000000000000e-01 1.5700884330426774e+02 2.5720455812698447e+02 7.3357936837856059e+01 0 -1 0
1010 1 9 5.9999999999999998e-02 1.5732116538309918e+02 2.5766603763317607e+02 7.2421138114771182e+01 0 -1 0
1015 1 12 -1.7999999999999999e-01 1.5455105973378568e+02 2.5775088045823304e+02 7.2710374939726748e+01 0 -1 0
1017 1 9 5.9999999999999998e-02 1.5442206400990713e+02 2.5846650660197400e+02 7.3522372062160755e+01 0 -1 0
1018 1 9 5.9999999999999998e-02 1.5359831695140159e+02 2.5734371386336176e+02 7.2371853456605024e+01 0 -1 0
1007 1 9 5.9999999999999998e-02 1.5908743944650863e+02 2.5639551485508986e+02 7.3534874096879847e+01 0 -1 0
37 1 9 5.9999999999999998e-02 1.6020981743335648e+02 2.6037860776522911e+02 7.3435861571992106e+01 0 -1 0
373 1 9 5.9999999999999998e-02 1.6356218786720194e+02 2.2454289450829398e+02 7.4574250244752321e+01 0 -1 0
372 1 9 5.9999999999999998e-02 1.6338451366260750e+02 2.2627501631144369e+02 7.5112465769722888e+01 0 -1 0
343 1 9 5.9999999999999998e-02 1.6232825131287487e+02 2.2546836732240624e+02 7.7986738685051307e+01 0 -1 0
379 1 9 5.9999999999999998e-02 1.6603522490453946e+02 2.2378894932408465e+02 7.5241750430443375e+01 0 -1 0
377 1 11 -1.2000000000000000e-01 1.6593601010307236e+02 2.2483146739315947e+02 7.5544095455362125e+01 0 -1 0
380 1 11 -1.2000000000000000e-01 1.6742802222291667e+02 2.2530470724417313e+02 7.5812931861609144e+01 0 -1 0
385 1 9 5.9999999999999998e-02 1.6836908965853357e+02 2.2379515928428287e+02 7.6723370411965305e+01 0 -1 0
378 1 9 5.9999999999999998e-02 1.6537309055517707e+02 2.2489589142722915e+02 7.6475262126064607e+01 0 -1 0
384 1 9 5.9999999999999998e-02 1.6735024484669137e+02 2.2468853535668018e+02 7.7905310328131108e+01 0 -1 0
383 1 11 -1.2000000000000000e-01 1.6806285176281571e+02 2.2477667449058492e+02 7.7085235375741718e+01 0 -1 0
386 1 11 -1.2000000000000000e-01 1.6932807256362668e+02 2.2551754423655333e+02 7.7600860172736503e+01 0 -1 0
387 1 9 5.9999999999999998e-02 1.6977602439762751e+02 2.2494660817177422e+02 7.8414168948349570e+01 0 -1 0
388 1 9 5.9999999999999998e-02 1.6906320492166498e+02 2.2651821174890179e+02 7.7942341780175269e+01 0 -1 0
317 1 9 5.9999999999999998e-02 1.5564824230100058e+02 2.3090236113911286e+02 8.1997296334712118e+01 0 -1 0
318 1 9 5.9999999999999998e-02 1.5542793763412737e+02 2.3204984137765027e+02 8.0672278767342789e+01 0 -1 0
316 1 12 -1.7999999999999999e-01 1.5615502511467730e+02 2.3141666855289395e+02 8.1180743192460668e+01 0 -1 0
313 1 11 -1.2000000000000000e-01 1.5675598461263687e+02 2.3039771586236526e+02 8.0181095893260505e+01 0 -1 0
319 1 9 5.9999999999999998e-02 1.5694800028370523e+02 2.3198541654465470e+02 8.1666352189626949e+01 0 -1 0
371 1 11 -1.2000000000000000e-01 1.6379781960551526e+02 2.2558809915874920e+02 7.4373938014036810e+01 0 -1 0
359 1 14 1.5300000000000000e-01 1.6172062809345985e+02 2.3063817011938801e+02 7.4355558082859545e+01 0 -1 0
360 1 15 -2.2200000000000000e-01 1.6210826142308889e+02 2.2948882922147325e+02 7.3679862706333452e+01 0 -1 0
366 1 18 -4.8999999999999999e-01 1.6098631495114770e+02 2.2744355943588764e+02 7.4407873612457806e+01 0 -1 0
302 1 2 -5.7599999999999998e-02 1.6095754144406683e+02 2.3088564145727048e+02 7.5447917707090454e+01 0 -1 0
303 1 3 -1.3239999999999999e-01 1.6089943101283836e+02 2.2995309061628853e+02 7.6507679529302180e+01 0 -1 0
361 1 16 6.2900000000000000e-01 1.6182444389932729e+02 2.2803074690228885e+02 7.3729918855323831e+01 0 -1 0
307 1 7 1.4210000000000000e-01 1.6143078466094479e+02 2.2902078775538300e+02 7.6385717747619054e+01 0 -1 0
375 1 9 5.9999999999999998e-02 1.6559928595940858e+02 2.2669199737956305e+02 7.4500000438592735e+01 0 -1 0
374 1 11 -1.2000000000000000e-01 1.6532273841376198e+02 2.2564607235226953e+02 7.4367100985449525e+01 0 -1 0
344 1 9 5.9999999999999998e-02 1.6314856126030503e+02 2.2690595416381171e+02 7.7331411263502474e+01 0 -1 0
315 1 9 5.9999999999999998e-02 1.5721843464670638e+02 2.3085360394429500e+02 7.9305649681146889e+01 0 -1 0
305 1 6 -1.8620000000000000e-01 1.6051838436976217e+02 2.3049832641906357e+02 7.7735196583342983e+01 0 -1 0
336 1 10 -5.9999999999999998e-02 1.6284592349883488e+02 2.2850576697705995e+02 7.9613774793873773e+01 0 -1 0
337 1 9 5.9999999999999998e-02 1.6303893598009472e+02 2.2904575557122865e+02 7.8686812820411191e+01 0 -1 0
312 1 9 5.9999999999999998e-02 1.5835422686304312e+02 2.2988384577501444e+02 8.1697770826435672e+01 0 -1 0
382 1 9 5.9999999999999998e-02 1.6806263663580808e+02 2.2515894897978282e+02 7.4938792388422115e+01 0 -1 0
390 1 9 5.9999999999999998e-02 1.7011487307103025e+02 2.2604742322277338e+02 7.5623577566567576e+01 0 -1 0
391 1 9 5.9999999999999998e-02 1.7080667406528988e+02 2.2467542091645763e+02 7.6402566030231796e+01 0 -1 0
389 1 12 -1.7999999999999999e-01 1.7046099537606077e+02 2.2569129866834044e+02 7.6593873736526817e+01 0 -1 0
392 1 9 5.9999999999999998e-02 1.7127685183734124e+02 2.2616083797260470e+02 7.7143429684844179e+01 0 -1 0
376 1 9 5.9999999999999998e-02 1.6578694296770780e+02 2.2543279073838480e+02 7.3404227282145754e+01 0 -1 0
381 1 9 5.9999999999999998e-02 1.6718259851235527e+02 2.2635905531413715e+02 7.5940278783838096e+01 0 -1 0
342 1 9 5.9999999999999998e-02 1.6394939344597969e+02 2.2595667754664709e+02 7.8523429443344497e+01 0 -1 0
341 1 12 -1.7999999999999999e-01 1.6296387608173069e+02 2.2631938745947173e+02 7.8231372865849124e+01 0 -1 0
444 1 9 5.9999999999999998e-02 1.6957519088816690e+02 2.2979809688499657e+02 7.7470193053592652e+01 0 -1 0
434 1 10 -5.9999999999999998e-02 1.6937533112106226e+02 2.3096925934269092e+02 7.5668912174540978e+01 0 -1 0
443 1 11 -1.2000000000000000e-01 1.6875014799220844e+02 2.3021930939092414e+02 7.6895750412715003e+01 0 -1 0
435 1 9 5.9999999999999998e-02 1.6871169381643338e+02 2.3175137365082347e+02 7.5300153802542056e+01 0 -1 0
445 1 9 5.9999999999999998e-02 1.6835961200926363e+02 2.3107845396257164e+02 7.7441142273931519e+01 0 -1 0
448 1 9 5.9999999999999998e-02 1.6777897763511208e+02 2.2843981835344141e+02 7.6011661316686073e+01 0 -1 0
446 1 11 -1.2000000000000000e-01 1.6752701065714547e+02 2.2927554088107078e+02 7.6664486387909008e+01 0 -1 0
449 1 11 -1.2000000000000000e-01 1.6624886420970284e+02 2.3005262356321290e+02 7.6113354129984231e+01 0 -1 0
455 1 9 5.9999999999999998e-02 1.6464444171443390e+02 2.2857443880638061e+02 7.5364845386877732e+01 0 -1 0
452 1 12 -1.7999999999999999e-01 1.6491987235576613e+02 2.2925072616964499e+02 7.6174087851015102e+01 0 -1 0
450 1 9 5.9999999999999998e-02 1.6619845327965842e+02 2.3086574894007100e+02 7.6837499046252063e+01 0 -1 0
454 1 9 5.9999999999999998e-02 1.6409542741131068e+02 2.2993922774508184e+02 7.6359441957501346e+01 0 -1 0
347 1 9 5.9999999999999998e-02 1.6468982215515405e+02 2.2943924116331686e+02 8.0319075998981916e+01 0 -1 0
346 1 9 5.9999999999999998e-02 1.6483779844904706e+02 2.2791645914861206e+02 7.9519762835090944e+01 0 -1 0
345 1 11 -1.2000000000000000e-01 1.6420625958848333e+02 2.2846778592620808e+02 8.0216395726373250e+01 0 -1 0
352 1 9 5.9999999999999998e-02 1.6652132888916879e+02 2.2711575269067302e+02 8.1328474382228322e+01 0 -1 0
447 1 9 5.9999999999999998e-02 1.6714422938160388e+02 2.2892281644300911e+02 7.7622173204650323e+01 0 -1 0
453 1 9 5.9999999999999998e-02 1.6494684542205158e+02 2.2856927453882429e+02 7.7024379638325584e+01 0 -1 0
437 1 9 5.9999999999999998e-02 1.7120817224586264e+02 2.3189082359872580e+02 7.5207424224507108e+01 0 -1 0
436 1 11 -1.2000000000000000e-01 1.7066843368864670e+02 2.3173935684631550e+02 7.6142218202617912e+01 0 -1 0
438 1 9 5.9999999999999998e-02 1.7129195330246455e+02 2.3100160154297353e+02 7.6647233450992672e+01 0 -1 0
439 1 12 -1.7999999999999999e-01 1.7062676141727792e+02 2.3306535981080657e+02 7.6865646568978249e+01 0 -1 0
442 1 9 5.9999999999999998e-02 1.7039763864861794e+02 2.3295766154258783e+02 7.7925837042828377e+01 0 -1 0
440 1 9 5.9999999999999998e-02 1.7148328320117895e+02 2.3371882528182135e+02 7.6699955315780002e+01 0 -1 0
476 1 9 5.9999999999999998e-02 1.7442520947603163e+02 2.3122722703327955e+02 7.6203988534511339e+01 0 -1 0
477 1 9 5.9999999999999998e-02 1.7587971552980531e+02 2.3113409330285620e+02 7.7273459118134014e+01 0 -1 0
479 1 9 5.9999999999999998e-02 1.7293522106489598e+02 2.3158665099345808e+02 7.8009890382714616e+01 0 -1 0
358 1 13 -1.1910000000000000e-01 1.6290872321661271e+02 2.3187276890242276e+02 7.3929163833644026e+01 0 -1 0
301 1 1 -4.7300000000000002e-02 1.6021452058608776e+02 2.3237651833705172e+02 7.5935718724968538e+01 0 -1 0
304 1 5 1.1110000000000000e-01 1.6021812968669070e+02 2.3183774929497645e+02 7.7620064350600330e+01 0 -1 0
299 1 5 1.1110000000000000e-01 1.5993073707137069e+02 2.3251896152332233e+02 7.8838129557519650e+01 0 -1 0
451 1 9 5.9999999999999998e-02 1.6633897847871432e+02 2.3050170509201197e+02 7.5124261000034011e+01 0 -1 0
456 1 13 -1.1910000000000000e-01 1.6985730148409331e+02 2.3714218363079974e+02 7.5328475092439831e+01 0 -1 0
441 1 9 5.9999999999999998e-02 1.6973117000254550e+02 2.3353899831521818e+02 7.6463548855347014e+01 0 -1 0
457 1 14 1.5300000000000000e-01 1.7083399610427765e+02 2.3605794875483357e+02 7.4277194867775975e+01 0 -1 0
464 1 18 -4.8999999999999999e-01 1.7353502321493940e+02 2.3465806399934763e+02 7.3439676673531068e+01 0 -1 0
459 1 16 6.2900000000000000e-01 1.7336284678042395e+02 2.3534849873475153e+02 7.4442132392229752e+01 0 -1 0
458 1 15 -2.2200000000000000e-01 1.7210342465315571e+02 2.3603107657809045e+02 7.4812279731801894e+01 0 -1 0
462 1 15 -2.2200000000000000e-01 1.7228038078797877e+02 2.3676641078406175e+02 7.6028247599064400e+01 0 -1 0
461 1 14 1.5300000000000000e-01 1.7113379788928933e+02 2.3741476084946595e+02 7.6458003235354909e+01 0 -1 0
460 1 17 -3.9700000000000002e-01 1.7425127118609061e+02 2.3561496150416815e+02 7.5546318463809570e+01 0 -1 0
468 1 9 5.9999999999999998e-02 1.7640519163534441e+02 2.3540324766919423e+02 7.4853915416677339e+01 0 -1 0
463 1 16 6.2900000000000000e-01 1.7365276857605778e+02 2.3648512978144853e+02 7.6541645859497493e+01 0 -1 0
473 1 9 5.9999999999999998e-02 1.7398346606573347e+02 2.3365191836288491e+02 7.7235671395165710e+01 0 -1 0
465 1 18 -4.8999999999999999e-01 1.7427646720486595e+02 2.3689560624988488e+02 7.7486437441313726e+01 0 -1 0
466 1 19 8.9999999999999997e-02 1.7565311017506400e+02 2.3512540663533792e+02 7.5592345137757817e+01 0 -1 0
470 1 9 5.9999999999999998e-02 1.7514487465296995e+02 2.3316118441558254e+02 7.4923772100724577e+01 0 -1 0
469 1 11 -1.2000000000000000e-01 1.7558428407146874e+02 2.3364576344900439e+02 7.5795668034532596e+01 0 -1 0
472 1 11 -1.2000000000000000e-01 1.7493352264689904e+02 2.3314614863220328e+02 7.7063364728495102e+01 0 -1 0
467 1 9 5.9999999999999998e-02 1.7617532179996866e+02 2.3551081337167466e+02 7.6468048656764566e+01 0 -1 0
475 1 11 -1.2000000000000000e-01 1.7489285499169290e+02 2.3157278000699813e+02 7.7125943522354817e+01 0 -1 0
474 1 9 5.9999999999999998e-02 1.7557888700584672e+02 2.3345732709148882e+02 7.7884810291421019e+01 0 -1 0
471 1 9 5.9999999999999998e-02 1.7655611950983825e+02 2.3316281917839595e+02 7.5897652133270498e+01 0 -1 0
626 1 9 5.9999999999999998e-02 1.5765757763990717e+02 2.4276506303766658e+02 7.6109869452636858e+01 0 -1 0
623 1 12 -1.7999999999999999e-01 1.5840165320425371e+02 2.4355124102657595e+02 7.6237837186173934e+01 0 -1 0
621 1 9 5.9999999999999998e-02 1.5825219034221462e+02 2.4334740475228122e+02 7.8270555808778667e+01 0 -1 0
624 1 9 5.9999999999999998e-02 1.5936054539603194e+02 2.4306169195805745e+02 7.6067638848461527e+01 0 -1 0
1163 1 9 5.9999999999999998e-02 1.6689554740239939e+02 2.4240254684379428e+02 7.7640308415471196e+01 0 -1 0
1166 1 9 5.9999999999999998e-02 1.6701921306852108e+02 2.4089861720750781e+02 7.5925630056002021e+01 0 -1 0
1161 1 11 -1.2000000000000000e-01 1.6791682994404678e+02 2.4222217067240570e+02 7.7304828997056973e+01 0 -1 0
1165 1 9 5.9999999999999998e-02 1.6731475386890889e+02 2.4254594527804016e+02 7.5204643296406175e+01 0 -1 0
1164 1 11 -1.2000000000000000e-01 1.6771098542577360e+02 2.4173350645940025e+02 7.5813777631211721e+01 0 -1 0
1162 1 9 5.9999999999999998e-02 1.6839648781068991e+02 2.4142556805593193e+02 7.7873557952061589e+01 0 -1 0
491 1 1 -4.7300000000000002e-02 1.6929957229883496e+02 2.3873965848517409e+02 7.8295865939821184e+01 0 -1 0
495 1 5 1.1110000000000000e-01 1.7007559323379780e+02 2.3952710558888515e+02 7.9677594286457023e+01 0 -1 0
492 1 2 -5.7599999999999998e-02 1.7089272187890307e+02 2.3822361369795146e+02 7.7609976836041795e+01 0 -1 0
1172 1 9 5.9999999999999998e-02 1.6848936584074792e+02 2.4009402185002583e+02 7.3494357423584788e+01 0 -1 0
1169 1 9 5.9999999999999998e-02 1.6958016564921130e+02 2.4055061015398414e+02 7.5659705024609138e+01 0 -1 0
1167 1 11 -1.2000000000000000e-01 1.6904503536567509e+02 2.4136697126487604e+02 7.5174637878797228e+01 0 -1 0
1175 1 9 5.9999999999999998e-02 1.7018846017085312e+02 2.4076942750751715e+02 7.2010666042129003e+01 0 -1 0
1176 1 9 5.9999999999999998e-02 1.7074936917749412e+02 2.3984356245450155e+02 7.3413776790477783e+01 0 -1 0
1174 1 9 5.9999999999999998e-02 1.7109226054584852e+02 2.4163284698580466e+02 7.3242692216205185e+01 0 -1 0
1173 1 12 -1.7999999999999999e-01 1.7038807131535981e+02 2.4081667618396537e+02 7.3081190658196448e+01 0 -1 0
1171 1 9 5.9999999999999998e-02 1.6860921729917956e+02 2.4185507734585258e+02 7.3094831642463944e+01 0 -1 0
1170 1 11 -1.2000000000000000e-01 1.6901945139847223e+02 2.4102901726633911e+02 7.3675721364022166e+01 0 -1 0
1168 1 9 5.9999999999999998e-02 1.6969755114889750e+02 2.4223284968095447e+02 7.5286788319478163e+01 0 -1 0
508 1 9 5.9999999999999998e-02 1.7248350246824876e+02 2.4148903511259303e+02 7.8206324970741974e+01 0 -1 0
509 1 11 -1.2000000000000000e-01 1.7377383398234420e+02 2.4325311775327739e+02 7.8019576064291513e+01 0 -1 0
510 1 9 5.9999999999999998e-02 1.7485409921189185e+02 2.4339641288339135e+02 7.8043940235888257e+01 0 -1 0
514 1 9 5.9999999999999998e-02 1.7353827739305791e+02 2.4262224711366915e+02 7.5960254511235973e+01 0 -1 0
507 1 10 -5.9999999999999998e-02 1.7331958160104770e+02 2.4194059993850900e+02 7.8740329550959913e+01 0 -1 0
521 1 9 5.9999999999999998e-02 1.7441349351521484e+02 2.4032789331345614e+02 7.6722619097463394e+01 0 -1 0
519 1 11 -1.2000000000000000e-01 1.7519804976547752e+02 2.4061966871740074e+02 7.7420787174583083e+01 0 -1 0
511 1 9 5.9999999999999998e-02 1.7339106493855368e+02 2.4401567634855573e+02 7.8697877158442864e+01 0 -1 0
493 1 3 -1.3239999999999999e-01 1.7190507201607778e+02 2.3863018320179347e+02 7.8500192056421369e+01 0 -1 0
502 1 7 1.4210000000000000e-01 1.7296266939774944e+02 2.3847743335055486e+02 7.8343490871908259e+01 0 -1 0
1159 1 9 5.9999999999999998e-02 1.6968164634501724e+02 2.4351184688001283e+02 7.7282396679821701e+01 0 -1 0
516 1 11 -1.2000000000000000e-01 1.7453538837281670e+02 2.4100457759551827e+02 7.8786919603982255e+01 0 -1 0
496 1 6 -1.8620000000000000e-01 1.7146015847914202e+02 2.3947142830143028e+02 7.9582490002660379e+01 0 -1 0
524 1 9 5.9999999999999998e-02 1.7625635068790828e+02 2.3907617349955575e+02 7.6536820577489763e+01 0 -1 0
526 1 9 5.9999999999999998e-02 1.7782135513389019e+02 2.4084477970455083e+02 7.7912489121877798e+01 0 -1 0
527 1 9 5.9999999999999998e-02 1.7836896027592022e+02 2.3907064338988266e+02 7.7850847369110014e+01 0 -1 0
520 1 9 5.9999999999999998e-02 1.7566304278735475e+02 2.4152370048467020e+02 7.7027584867429354e+01 0 -1 0
528 1 9 5.9999999999999998e-02 1.7762156556285797e+02 2.3963571782298794e+02 7.9180164961981220e+01 0 -1 0
525 1 12 -1.7999999999999999e-01 1.7759481524848650e+02 2.3979561039613557e+02 7.8102287979104091e+01 0 -1 0
522 1 11 -1.2000000000000000e-01 1.7616273623750223e+02 2.3944751813740305e+02 7.7557330008898688e+01 0 -1 0
523 1 9 5.9999999999999998e-02 1.7584497529943732e+02 2.3858547318456542e+02 7.8143850753992851e+01 0 -1 0
976 1 9 5.9999999999999998e-02 1.4308148465335597e+02 2.4802757520164829e+02 7.6945760713065141e+01 0 -1 0
969 1 9 5.9999999999999998e-02 1.4619115250281195e+02 2.4909872220191249e+02 7.6095671947936069e+01 0 -1 0
972 1 9 5.9999999999999998e-02 1.4568204934942548e+02 2.4845079406567879e+02 7.8399862720741282e+01 0 -1 0
975 1 9 5.9999999999999998e-02 1.4441206725589279e+02 2.4722182806475388e+02 7.6339450356637570e+01 0 -1 0
974 1 11 -1.2000000000000000e-01 1.4403871356598844e+02 2.4762730438641717e+02 7.7279820717313285e+01 0 -1 0
192 1 9 5.9999999999999998e-02 1.4988714731570337e+02 2.4446695656239962e+02 7.4010304921719197e+01 0 -1 0
190 1 11 -1.2000000000000000e-01 1.4902235287573765e+02 2.4477612704017352e+02 7.4597368972626597e+01 0 -1 0
191 1 9 5.9999999999999998e-02 1.4827242186357975e+02 2.4401120078448619e+02 7.4395896145916481e+01 0 -1 0
970 1 9 5.9999999999999998e-02 1.4473183352370299e+02 2.4995768129792509e+02 7.5999091821904074e+01 0 -1 0
979 1 9 5.9999999999999998e-02 1.4321561880713955e+02 2.4573520884550572e+02 7.8014139877522538e+01 0 -1 0
189 1 9 5.9999999999999998e-02 1.4871343540317559e+02 2.4459258129499170e+02 7.6620777103042172e+01 0 -1 0
187 1 11 -1.2000000000000000e-01 1.4957411704085027e+02 2.4460505846426562e+02 7.5952068317617176e+01 0 -1 0
188 1 9 5.9999999999999998e-02 1.4995563006854252e+02 2.4359122042488244e+02 7.6073230362447092e+01 0 -1 0
968 1 11 -1.2000000000000000e-01 1.4550783707124967e+02 2.4968178942339392e+02 7.6713096146919796e+01 0 -1 0
971 1 11 -1.2000000000000000e-01 1.4486540774481097e+02 2.4887420512500009e+02 7.7815123768218641e+01 0 -1 0
978 1 9 5.9999999999999998e-02 1.4451855066633735e+02 2.4620952882429381e+02 7.8846191359677135e+01 0 -1 0
977 1 12 -1.7999999999999999e-01 1.4362762232316419e+02 2.4666279014263242e+02 7.8411564135875409e+01 0 -1 0
980 1 9 5.9999999999999998e-02 1.4308207258345908e+02 2.4718042191855278e+02 7.9200571675351881e+01 0 -1 0
973 1 9 5.9999999999999998e-02 1.4418736052409241e+02 2.4938823568000333e+02 7.8496391046535805e+01 0 -1 0
185 1 9 5.9999999999999998e-02 1.5137367567848619e+02 2.4588757337491899e+02 7.5465175404564363e+01 0 -1 0
182 1 9 5.9999999999999998e-02 1.5194393764159082e+02 2.4450582101620640e+02 7.7374705196567675e+01 0 -1 0
183 1 9 5.9999999999999998e-02 1.5061641892369730e+02 2.4529071452005371e+02 7.8395055411538621e+01 0 -1 0
186 1 9 5.9999999999999998e-02 1.5008816960655275e+02 2.4663831661281250e+02 7.6345667868009770e+01 0 -1 0
1030 1 9 5.9999999999999998e-02 1.5238392777018666e+02 2.5037125916783000e+02 7.6282166504425689e+01 0 -1 0
184 1 11 -1.2000000000000000e-01 1.5067628160490983e+02 2.4572250132906333e+02 7.6286450706768861e+01 0 -1 0
181 1 11 -1.2000000000000000e-01 1.5140121031590417e+02 2.4541067207771925e+02 7.7648185987876971e+01 0 -1 0
1035 1 9 5.9999999999999998e-02 1.5606696525798489e+02 2.4968782372617278e+02 7.4570206139485336e+01 0 -1 0
1037 1 11 -1.2000000000000000e-01 1.5635153100049115e+02 2.4768409212531702e+02 7.5480445489838445e+01 0 -1 0
1039 1 9 5.9999999999999998e-02 1.5583064608407588e+02 2.4699024789041221e+02 7.6140263037829854e+01 0 -1 0
1038 1 9 5.9999999999999998e-02 1.5734946368574427e+02 2.4788167098247692e+02 7.5871844409942000e+01 0 -1 0
1034 1 11 -1.2000000000000000e-01 1.5557435182396185e+02 2.4902309166927347e+02 7.5279828080880790e+01 0 -1 0
179 1 9 5.9999999999999998e-02 1.5304659017072362e+02 2.4667074841995588e+02 7.7133489028841936e+01 0 -1 0
1036 1 9 5.9999999999999998e-02 1.5460222522056924e+02 2.4878094225892565e+02 7.4850370417248797e+01 0 -1 0
180 1 9 5.9999999999999998e-02 1.5174090023907593e+02 2.4741008036412782e+02 7.8151438286401401e+01 0 -1 0
1032 1 9 5.9999999999999998e-02 1.5627500170439382e+02 2.4969645505813673e+02 7.7196219144246129e+01 0 -1 0
1033 1 9 5.9999999999999998e-02 1.5459244585731258e+02 2.4953500980377066e+02 7.7155495261702754e+01 0 -1 0
1031 1 11 -1.2000000000000000e-01 1.5542512819572696e+02 2.4986688195798104e+02 7.6535333177736092e+01 0 -1 0
178 1 11 -1.2000000000000000e-01 1.5237995399597460e+02 2.4654264755671406e+02 7.7986300085574655e+01 0 -1 0
622 1 9 5.9999999999999998e-02 1.5712307592646152e+02 2.4444474425759202e+02 7.7748353981597873e+01 0 -1 0
616 1 9 5.9999999999999998e-02 1.5783885898032821e+02 2.4639560393221126e+02 7.9548573366923350e+01 0 -1 0
174 1 9 5.9999999999999998e-02 1.5403708445440088e+02 2.4824672647130498e+02 7.9350366448995416e+01 0 -1 0
173 1 9 5.9999999999999998e-02 1.5510763100060780e+02 2.4699872281425684e+02 7.8782082099582581e+01 0 -1 0
175 1 11 -1.2000000000000000e-01 1.5314043721307982e+02 2.4618368652370614e+02 7.9256848169348359e+01 0 -1 0
176 1 9 5.9999999999999998e-02 1.5366458471209600e+02 2.4523202386740013e+02 7.9169055042371966e+01 0 -1 0
172 1 19 8.9999999999999997e-02 1.5428480999859255e+02 2.4719205118077213e+02 7.9470333475622837e+01 0 -1 0
625 1 9 5.9999999999999998e-02 1.5831571433376646e+02 2.4428501560999302e+02 7.5436407606453784e+01 0 -1 0
620 1 11 -1.2000000000000000e-01 1.5817908921527683e+02 2.4421217608601452e+02 7.7611066030583032e+01 0 -1 0
615 1 9 5.9999999999999998e-02 1.5905005836085994e+02 2.4530194859052432e+02 8.0203160620799807e+01 0 -1 0
618 1 9 5.9999999999999998e-02 1.6012046178467332e+02 2.4489418944491212e+02 7.8130267860631307e+01 0 -1 0
617 1 11 -1.2000000000000000e-01 1.5914659868665069e+02 2.4537517649532433e+02 7.8038932632470789e+01 0 -1 0
614 1 11 -1.2000000000000000e-01 1.5886692474747227e+02 2.4605207311061159e+02 7.9433824219308676e+01 0 -1 0
619 1 9 5.9999999999999998e-02 1.5928585046773324e+02 2.4610549687942174e+02 7.7241849779785198e+01 0 -1 0
610 1 12 -1.7999999999999999e-01 1.5984225088024689e+02 2.4980390832702361e+02 7.8939541838046551e+01 0 -1 0
607 1 11 -1.2000000000000000e-01 1.5947166579968652e+02 2.4834537121506293e+02 7.8592671858423330e+01 0 -1 0
608 1 9 5.9999999999999998e-02 1.5846510211123959e+02 2.4820017908623083e+02 7.8200436231766034e+01 0 -1 0
609 1 9 5.9999999999999998e-02 1.6006144911339305e+02 2.4808963935644800e+02 7.7712412318123242e+01 0 -1 0
605 1 10 -5.9999999999999998e-02 1.5968011121257507e+02 2.4732019960260257e+02 7.9717582289399317e+01 0 -1 0
602 1 8 4.4400000000000002e-02 1.6119395014111157e+02 2.4686942625148569e+02 7.9783833549774812e+01 0 -1 0
603 1 9 5.9999999999999998e-02 1.6153664788352668e+02 2.4659255552568479e+02 7.8786837584918715e+01 0 -1 0
631 1 9 5.9999999999999998e-02 1.6288661007119347e+02 2.4866743357839749e+02 7.7981788134469141e+01 0 -1 0
627 1 8 4.4400000000000002e-02 1.6337119700023396e+02 2.4925991212386640e+02 8.0047146929368466e+01 0 -1 0
630 1 10 -5.9999999999999998e-02 1.6367623534745761e+02 2.4916092965365837e+02 7.8548404006808511e+01 0 -1 0
636 1 9 5.9999999999999998e-02 1.6478017052812353e+02 2.4654026163810431e+02 7.9479873694866257e+01 0 -1 0
611 1 9 5.9999999999999998e-02 1.5915068580677209e+02 2.5024169836895464e+02 7.9659387434571173e+01 0 -1 0
606 1 9 5.9999999999999998e-02 1.5933590640135102e+02 2.4776492310661646e+02 8.0651308187566315e+01 0 -1 0
604 1 9 5.9999999999999998e-02 1.6129608433906387e+02 2.4595755986784167e+02 8.0372194243773734e+01 0 -1 0
1158 1 11 -1.2000000000000000e-01 1.6862901781781460e+02 2.4358779167852029e+02 7.7554987184993280e+01 0 -1 0
1160 1 9 5.9999999999999998e-02 1.6829779657942973e+02 2.4429853229256901e+02 7.6797860698868263e+01 0 -1 0
1157 1 9 5.9999999999999998e-02 1.6738794218619722e+02 2.4445479874022470e+02 7.9047413633313298e+01 0 -1 0
1155 1 11 -1.2000000000000000e-01 1.6842257632501671e+02 2.4411769561477078e+02 7.8984217940057491e+01 0 -1 0
638 1 9 5.9999999999999998e-02 1.6573180573773223e+02 2.4636343486227656e+02 7.7924941526362574e+01 0 -1 0
633 1 9 5.9999999999999998e-02 1.6586771519207633e+02 2.4879615387410627e+02 7.8849312573448529e+01 0 -1 0
637 1 9 5.9999999999999998e-02 1.6409915334541998e+02 2.4634394969536376e+02 7.7892200738149953e+01 0 -1 0
635 1 12 -1.7999999999999999e-01 1.6489899575915985e+02 2.4684280149354331e+02 7.8439465751244555e+01 0 -1 0
632 1 11 -1.2000000000000000e-01 1.6501043034782748e+02 2.4839414772031745e+02 7.8309355182181903e+01 0 -1 0
634 1 9 5.9999999999999998e-02 1.6519828425301202e+02 2.4862901281249412e+02 7.7261667549843253e+01 0 -1 0
1154 1 9 5.9999999999999998e-02 1.6904887051605257e+02 2.4617370736058200e+02 7.8722309379738647e+01 0 -1 0
1152 1 19 8.9999999999999997e-02 1.6930686720704088e+02 2.4530932216563482e+02 7.9334172071755617e+01 0 -1 0
512 1 12 -1.7999999999999999e-01 1.7324129109244808e+02 2.4345173971406459e+02 7.6602003085859394e+01 0 -1 0
513 1 9 5.9999999999999998e-02 1.7218184286803628e+02 2.4368989503305946e+02 7.6696615782975840e+01 0 -1 0
515 1 9 5.9999999999999998e-02 1.7377188044909607e+02 2.4427388658663861e+02 7.6121743308125005e+01 0 -1 0
1153 1 9 5.9999999999999998e-02 1.7033411847434158e+02 2.4509412491018779e+02 7.9039986708865541e+01 0 -1 0
958 1 9 5.9999999999999998e-02 1.4712018238828875e+02 2.5445283541650807e+02 7.5521690749643383e+01 0 -1 0
956 1 19 8.9999999999999997e-02 1.4806011186898095e+02 2.5400451922930122e+02 7.5843630675723517e+01 0 -1 0
963 1 9 5.9999999999999998e-02 1.4744100289304998e+02 2.5122042262008074e+02 7.5493564657737423e+01 0 -1 0
955 1 18 -4.8999999999999999e-01 1.5097761884272998e+02 2.5439935698437785e+02 7.5997029419770584e+01 0 -1 0
964 1 9 5.9999999999999998e-02 1.4607871886967814e+02 2.5216756895428188e+02 7.5725814056981278e+01 0 -1 0
967 1 9 5.9999999999999998e-02 1.4564265212900403e+02 2.5141380091436980e+02 7.7888828247037694e+01 0 -1 0
965 1 11 -1.2000000000000000e-01 1.4633942367079041e+02 2.5079776218875014e+02 7.7320404363649956e+01 0 -1 0
930 1 9 5.9999999999999998e-02 1.4879249099167652e+02 2.5461899475138924e+02 8.0700169332101652e+01 0 -1 0
950 1 17 -3.9700000000000002e-01 1.4879115120887124e+02 2.5502683461670352e+02 7.6594784669501294e+01 0 -1 0
953 1 16 6.2900000000000000e-01 1.5022205051004110e+02 2.5518279390043298e+02 7.6526374525955191e+01 0 -1 0
966 1 9 5.9999999999999998e-02 1.4717441003679485e+02 2.5041890256817624e+02 7.7909779613043881e+01 0 -1 0
962 1 11 -1.2000000000000000e-01 1.4690640971874674e+02 2.5173793000957218e+02 7.6290117391832737e+01 0 -1 0
959 1 11 -1.2000000000000000e-01 1.4771117793476560e+02 2.5291003197478915e+02 7.6910961695294475e+01 0 -1 0
960 1 9 5.9999999999999998e-02 1.4862440146263930e+02 2.5258735054912009e+02 7.7410961533196456e+01 0 -1 0
961 1 9 5.9999999999999998e-02 1.4712433146556529e+02 2.5332933113835472e+02 7.7728213192003665e+01 0 -1 0
929 1 12 -1.7999999999999999e-01 1.4902337820635393e+02 2.5510839581434306e+02 8.1646360505979061e+01 0 -1 0
1029 1 9 5.9999999999999998e-02 1.5175515874206766e+02 2.5195889810228411e+02 7.6660320947304839e+01 0 -1 0
931 1 9 5.9999999999999998e-02 1.4976268454433807e+02 2.5586034237057228e+02 8.1370493668031116e+01 0 -1 0
996 1 9 5.9999999999999998e-02 1.5649974087623514e+02 2.5415356742797334e+02 7.4557413337498971e+01 0 -1 0
1025 1 9 5.9999999999999998e-02 1.5356551580853002e+02 2.5187670987955877e+02 7.4914665539045487e+01 0 -1 0
1028 1 9 5.9999999999999998e-02 1.5293157731128136e+02 2.5118126994626809e+02 7.7757046159623883e+01 0 -1 0
1027 1 12 -1.7999999999999999e-01 1.5264773104462193e+02 2.5133575392909145e+02 7.6716053367580102e+01 0 -1 0
994 1 8 4.4400000000000002e-02 1.5719406061822144e+02 2.5420709703207680e+02 7.5395956525060029e+01 0 -1 0
1022 1 10 -5.9999999999999998e-02 1.5522960944903619e+02 2.5142501531546776e+02 7.6362099196381763e+01 0 -1 0
1024 1 11 -1.2000000000000000e-01 1.5382632608931024e+02 2.5193963853933357e+02 7.5971130388333506e+01 0 -1 0
1026 1 9 5.9999999999999998e-02 1.5377200894264024e+02 2.5301569112374031e+02 7.6136237936537157e+01 0 -1 0
1021 1 9 5.9999999999999998e-02 1.5649618833263895e+02 2.5168222167011177e+02 7.8015384477399209e+01 0 -1 0
1023 1 9 5.9999999999999998e-02 1.5585018126076068e+02 2.5170732283433793e+02 7.5511632800054230e+01 0 -1 0
992 1 7 1.4210000000000000e-01 1.5322943433409063e+02 2.5523146031760015e+02 7.6003813458994372e+01 0 -1 0
1019 1 8 4.4400000000000002e-02 1.5568269920947938e+02 2.5225766948842318e+02 7.7573575404537053e+01 0 -1 0
1020 1 9 5.9999999999999998e-02 1.5477001309635679e+02 2.5228558012360423e+02 7.8168827545677402e+01 0 -1 0
983 1 3 -1.3239999999999999e-01 1.5365307839784197e+02 2.5588760092956355e+02 7.6749739195633410e+01 0 -1 0
986 1 6 -1.8620000000000000e-01 1.5491654870769415e+02 2.5546312025044730e+02 7.7226687530284124e+01 0 -1 0
984 1 4 1.7790000000000000e-01 1.5623776651970394e+02 2.5404471554886450e+02 7.7099436725280555e+01 0 -1 0
985 1 5 1.1110000000000000e-01 1.5532561577041591e+02 2.5634911403258218e+02 7.8194373846180852e+01 0 -1 0
670 1 9 5.9999999999999998e-02 1.5391896254415829e+02 2.5423822196045882e+02 7.9746740506969758e+01 0 -1 0
990 1 5 1.1110000000000000e-01 1.5660985534792223e+02 2.5606234532310310e+02 7.8829243452925908e+01 0 -1 0
663 1 9 5.9999999999999998e-02 1.5655413668551904e+02 2.5312094805329596e+02 8.0363705235224927e+01 0 -1 0
991 1 6 -1.8620000000000000e-01 1.5730252774901470e+02 2.5488933826553574e+02 7.8489075152778526e+01 0 -1 0
997 1 10 -5.9999999999999998e-02 1.5805818037326574e+02 2.5542933084545334e+02 7.5197594990086586e+01 0 -1 0
1000 1 9 5.9999999999999998e-02 1.5994517375797591e+02 2.5441204352446388e+02 7.4887359125047070e+01 0 -1 0
640 1 9 5.9999999999999998e-02 1.6384429208577103e+02 2.5053196103943600e+02 7.6820113271194089e+01 0 -1 0
639 1 11 -1.2000000000000000e-01 1.6374160393379887e+02 2.5054292745378280e+02 7.7905209988407734e+01 0 -1 0
995 1 9 5.9999999999999998e-02 1.5790034611037910e+02 2.5337737138495189e+02 7.5367388002570408e+01 0 -1 0
1002 1 12 -1.7999999999999999e-01 1.6042068222529841e+02 2.5618202607676483e+02 7.5788578596206577e+01 0 -1 0
1003 1 9 5.9999999999999998e-02 1.6147844810486345e+02 2.5593494481104221e+02 7.5698122593494162e+01 0 -1 0
613 1 9 5.9999999999999998e-02 1.6088606755768757e+02 2.4974931204604525e+02 7.9248678613842614e+01 0 -1 0
612 1 9 5.9999999999999998e-02 1.5987882698685027e+02 2.5042241940488111e+02 7.8042766373825742e+01 0 -1 0
998 1 9 5.9999999999999998e-02 1.5765034205408455e+02 2.5619924623485525e+02 7.5852574530659822e+01 0 -1 0
989 1 3 -1.3239999999999999e-01 1.5850521814281723e+02 2.5464643111748092e+02 7.9263890233558485e+01 0 -1 0
999 1 11 -1.2000000000000000e-01 1.5945255774474603e+02 2.5499388988009866e+02 7.5666387069193533e+01 0 -1 0
1001 1 9 5.9999999999999998e-02 1.5927614695350766e+02 2.5447372843514427e+02 7.6607881327786103e+01 0 -1 0
629 1 9 5.9999999999999998e-02 1.6291254761540014e+02 2.5019250644418648e+02 8.0375793486430211e+01 0 -1 0
988 1 2 -5.7599999999999998e-02 1.5877392466809397e+02 2.5562978711472692e+02 8.0140484627642678e+01 0 -1 0
993 1 7 1.4210000000000000e-01 1.5904093785588466e+02 2.5371606208917237e+02 7.9146340838854883e+01 0 -1 0
641 1 9 5.9999999999999998e-02 1.6276749631604261e+02 2.5102210034836273e+02 7.8003228787564339e+01 0 -1 0
642 1 11 -1.2000000000000000e-01 1.6470237327810844e+02 2.5152854478013842e+02 7.8531268733528989e+01 0 -1 0
644 1 9 5.9999999999999998e-02 1.6476619621265837e+02 2.5144768186756005e+02 7.9616389842377956e+01 0 -1 0
647 1 9 5.9999999999999998e-02 1.6338893592253245e+02 2.5319190766470604e+02 7.8821491045903500e+01 0 -1 0
645 1 11 -1.2000000000000000e-01 1.6429798005642155e+02 2.5299020559178416e+02 7.8254873827086456e+01 0 -1 0
650 1 9 5.9999999999999998e-02 1.6558281199453737e+02 2.5402596101290061e+02 7.9772963949596274e+01 0 -1 0
628 1 9 5.9999999999999998e-02 1.6430342277301304e+02 2.4929023435137469e+02 8.0611182024371871e+01 0 -1 0
643 1 9 5.9999999999999998e-02 1.6572736039405433e+02 2.5143344214216273e+02 7.8172859886277337e+01 0 -1 0
646 1 9 5.9999999999999998e-02 1.6414964591539902e+02 2.5307185390358680e+02 7.7178105213007342e+01 0 -1 0
648 1 12 -1.7999999999999999e-01 1.6537451588886546e+02 2.5401486999275829e+02 7.8703108876207864e+01 0 -1 0
649 1 9 5.9999999999999998e-02 1.6506452520473192e+02 2.5500718676915005e+02 7.8375521853753966e+01 0 -1 0
651 1 9 5.9999999999999998e-02 1.6635814048777968e+02 2.5381297194267424e+02 7.8279057163882243e+01 0 -1 0
907 1 9 5.9999999999999998e-02 1.4303130035314408e+02 2.5625436477353253e+02 8.0316830566429147e+01 0 -1 0
912 1 9 5.9999999999999998e-02 1.4361824202810257e+02 2.6015355727838840e+02 7.8330719717352409e+01 0 -1 0
905 1 9 5.9999999999999998e-02 1.4142638466813753e+02 2.5664797348636523e+02 8.0871250306648804e+01 0 -1 0
904 1 12 -1.7999999999999999e-01 1.4248231273595312e+02 2.5686266692435112e+02 8.1035635958642033e+01 0 -1 0
906 1 9 5.9999999999999998e-02 1.4270845460809861e+02 2.5654186755971614e+02 8.2052517279199421e+01 0 -1 0
901 1 11 -1.2000000000000000e-01 1.4253804612418244e+02 2.5840733391610206e+02 8.0766852649794572e+01 0 -1 0
902 1 9 5.9999999999999998e-02 1.4213406643114266e+02 2.5875069645171715e+02 7.9814485793194663e+01 0 -1 0
903 1 9 5.9999999999999998e-02 1.4188867903815708e+02 2.5893042855186320e+02 8.1468845807432601e+01 0 -1 0
899 1 10 -5.9999999999999998e-02 1.4389875138554842e+02 2.5896795455609458e+02 8.1067650529601920e+01 0 -1 0
909 1 9 5.9999999999999998e-02 1.4332098206490750e+02 2.6108002557901420e+02 8.0712390902991771e+01 0 -1 0
897 1 9 5.9999999999999998e-02 1.4390059472033042e+02 2.5793436960729730e+02 8.3082621629661318e+01 0 -1 0
896 1 8 4.4400000000000002e-02 1.4426699226513702e+02 2.5879398654745421e+02 8.2521451831173025e+01 0 -1 0
898 1 9 5.9999999999999998e-02 1.4374220222267599e+02 2.5952171981580739e+02 8.3140402314981230e+01 0 -1 0
908 1 11 -1.2000000000000000e-01 1.4416694366407410e+02 2.6040880050235535e+02 8.0564384607028799e+01 0 -1 0
900 1 9 5.9999999999999998e-02 1.4454324338658719e+02 2.5828687995741166e+02 8.0511892082409389e+01 0 -1 0
910 1 9 5.9999999999999998e-02 1.4498112267214881e+02 2.6098655174205902e+02 8.1001896153804779e+01 0 -1 0
911 1 11 -1.2000000000000000e-01 1.4440147553290538e+02 2.6048299106010404e+02 7.9013449372363894e+01 0 -1 0
949 1 16 6.2900000000000000e-01 1.4817610716541768e+02 2.5616621810870004e+02 7.7129561186177753e+01 0 -1 0
952 1 15 -2.2200000000000000e-01 1.5049947894010555e+02 2.5648811037512371e+02 7.7165393360408402e+01 0 -1 0
954 1 18 -4.8999999999999999e-01 1.4696859902420468e+02 2.5627292499485782e+02 7.7191211045239669e+01 0 -1 0
927 1 9 5.9999999999999998e-02 1.4726969730365900e+02 2.5635217163023020e+02 8.1613365337070775e+01 0 -1 0
886 1 4 1.7790000000000000e-01 1.4616118987436175e+02 2.5884912075527660e+02 8.2764247388133143e+01 0 -1 0
913 1 9 5.9999999999999998e-02 1.4515361466987270e+02 2.5976929844223639e+02 7.8677250662892234e+01 0 -1 0
948 1 15 -2.2200000000000000e-01 1.4930368076523612e+02 2.5707717101002004e+02 7.7634069693199976e+01 0 -1 0
895 1 7 1.4210000000000000e-01 1.4717651387127876e+02 2.5746811710943990e+02 7.9644449575845584e+01 0 -1 0
947 1 14 1.5300000000000000e-01 1.4946295729504624e+02 2.5824243502148011e+02 7.8387091110522633e+01 0 -1 0
890 1 2 -5.7599999999999998e-02 1.4854032778334135e+02 2.5901963758454258e+02 7.9200011408250475e+01 0 -1 0
889 1 1 -4.7300000000000002e-02 1.4887427990097589e+02 2.6057960049183566e+02 7.9981361034489908e+01 0 -1 0
891 1 3 -1.3239999999999999e-01 1.4752062701661666e+02 2.5845654613978263e+02 7.9910896934964498e+01 0 -1 0
893 1 6 -1.8620000000000000e-01 1.4726493052305651e+02 2.5910871028474719e+02 8.1163499746832514e+01 0 -1 0
887 1 5 1.1110000000000000e-01 1.4767733323429215e+02 2.6101155430436307e+02 8.2550450340233866e+01 0 -1 0
892 1 5 1.1110000000000000e-01 1.4790233480918002e+02 2.6029033187379798e+02 8.1310093801045483e+01 0 -1 0
1011 1 9 5.9999999999999998e-02 1.5693905826106638e+02 2.5798282284248427e+02 7.4117893498232931e+01 0 -1 0
982 1 2 -5.7599999999999998e-02 1.5303955857203391e+02 2.5693662427146717e+02 7.7335323442296229e+01 0 -1 0
946 1 13 -1.1910000000000000e-01 1.5119597376988324e+02 2.5873761416147312e+02 7.8207748832183313e+01 0 -1 0
951 1 14 1.5300000000000000e-01 1.5162032134543881e+02 2.5727064864905986e+02 7.7307589220191645e+01 0 -1 0
682 1 9 5.9999999999999998e-02 1.5067326656317832e+02 2.5846544863681851e+02 8.1589706633222875e+01 0 -1 0
676 1 9 5.9999999999999998e-02 1.5215550588838357e+02 2.5616004143905838e+02 8.0500774323923366e+01 0 -1 0
50 1 9 5.9999999999999998e-02 1.5336484802328687e+02 2.6075041488700487e+02 7.6778002148950449e+01 0 -1 0
981 1 1 -4.7300000000000002e-02 1.5425067704258475e+02 2.5766378403696064e+02 7.8385985371228145e+01 0 -1 0
47 1 12 -1.7999999999999999e-01 1.5438552534573716e+02 2.6111856994460373e+02 7.6881827272906733e+01 0 -1 0
40 1 9 5.9999999999999998e-02 1.5584623758096248e+02 2.6018011882936008e+02 7.9653117076703055e+01 0 -1 0
39 1 8 4.4400000000000002e-02 1.5657782589630827e+02 2.6083907350029932e+02 7.9185508611887357e+01 0 -1 0
49 1 9 5.9999999999999998e-02 1.5499856779712545e+02 2.6022131708843847e+02 7.6796878671183293e+01 0 -1 0
41 1 9 5.9999999999999998e-02 1.5704544450897913e+02 2.6042556059273323e+02 7.8291953962593396e+01 0 -1 0
987 1 1 -4.7300000000000002e-02 1.5751920220729457e+02 2.5691656513595990e+02 8.0055132536768980e+01 0 -1 0
46 1 9 5.9999999999999998e-02 1.5390646609016159e+02 2.6102554005212801e+02 7.8784667575365162e+01 0 -1 0
44 1 11 -1.2000000000000000e-01 1.5441238059307778e+02 2.6181444673554529e+02 7.8228091412566243e+01 0 -1 0
48 1 9 5.9999999999999998e-02 1.5462412434686570e+02 2.6169476583613533e+02 7.5987864849546966e+01 0 -1 0
38 1 9 5.9999999999999998e-02 1.6184913720975121e+02 2.6077298166779298e+02 7.3878368376869730e+01 0 -1 0
35 1 12 -1.7999999999999999e-01 1.6081578471566888e+02 2.6083241772148426e+02 7.4220055565037512e+01 0 -1 0
1004 1 9 5.9999999999999998e-02 1.6018883491892359e+02 2.5678672664982423e+02 7.6665324885051604e+01 0 -1 0
1005 1 9 5.9999999999999998e-02 1.6032916056458376e+02 2.5690062556122422e+02 7.4974122773934795e+01 0 -1 0
33 1 9 5.9999999999999998e-02 1.6082832853274465e+02 2.5907741452569047e+02 7.5519013767567174e+01 0 -1 0
28 1 9 5.9999999999999998e-02 1.5901717657142709e+02 2.6059999128914433e+02 7.7732727439782067e+01 0 -1 0
24 1 9 5.9999999999999998e-02 1.6252965810643141e+02 2.5855744557149791e+02 7.8980766617520445e+01 0 -1 0
25 1 9 5.9999999999999998e-02 1.6149656667346468e+02 2.5843657938196463e+02 8.0336136955261537e+01 0 -1 0
27 1 9 5.9999999999999998e-02 1.5988704150225209e+02 2.5921712356801947e+02 7.8006356485580866e+01 0 -1 0
26 1 11 -1.2000000000000000e-01 1.6003868602049974e+02 2.6029555411845672e+02 7.7960622167190550e+01 0 -1 0
21 1 9 5.9999999999999998e-02 1.6255267842625938e+02 2.6080354282047705e+02 7.9014532390411958e+01 0 -1 0
18 1 9 5.9999999999999998e-02 1.6023827649293605e+02 2.6174918006789687e+02 7.9465194355730063e+01 0 -1 0
19 1 11 -1.2000000000000000e-01 1.6187098597814585e+02 2.6049544911889586e+02 7.9807295709588630e+01 0 -1 0
17 1 10 -5.9999999999999998e-02 1.6037937270833947e+02 2.6067240889702379e+02 7.9371622439134697e+01 0 -1 0
22 1 12 -1.7999999999999999e-01 1.6230686211032372e+02 2.5904271417914129e+02 7.9931017326040319e+01 0 -1 0
34 1 9 5.9999999999999998e-02 1.5934720251287024e+02 2.6007740356941002e+02 7.5536036528452797e+01 0 -1 0
32 1 11 -1.2000000000000000e-01 1.6043610846680903e+02 2.6009241870025346e+02 7.5582495817077728e+01 0 -1 0
30 1 9 5.9999999999999998e-02 1.6193612005895386e+02 2.6059608588850892e+02 7.6891006313355263e+01 0 -1 0
31 1 9 5.9999999999999998e-02 1.6077835322508545e+02 2.6193295657240060e+02 7.6757263186523986e+01 0 -1 0
29 1 11 -1.2000000000000000e-01 1.6087795103388149e+02 2.6084980590392547e+02 7.6827725445005683e+01 0 -1 0
36 1 9 5.9999999999999998e-02 1.6045297744714713e+02 2.6185928953040627e+02 7.4264835723799195e+01 0 -1 0
915 1 9 5.9999999999999998e-02 1.4403539456023057e+02 2.6259080484740980e+02 7.8796966136470715e+01 0 -1 0
918 1 9 5.9999999999999998e-02 1.4612111745678573e+02 2.6237346702142929e+02 7.6852219277550574e+01 0 -1 0
920 1 9 5.9999999999999998e-02 1.4532028714671745e+02 2.6083773315037723e+02 7.6834070326019372e+01 0 -1 0
917 1 12 -1.7999999999999999e-01 1.4518356114124404e+02 2.6188250994350403e+02 7.7113081890049756e+01 0 -1 0
919 1 9 5.9999999999999998e-02 1.4440497288669280e+02 2.6238031960020430e+02 7.6535080251631086e+01 0 -1 0
914 1 11 -1.2000000000000000e-01 1.4482515407804482e+02 2.6186613485051924e+02 7.8598892159239881e+01 0 -1 0
916 1 9 5.9999999999999998e-02 1.4566776016204750e+02 2.6217702486870309e+02 7.9216518691127490e+01 0 -1 0
45 1 9 5.9999999999999998e-02 1.5380991440311197e+02 2.6272169214471683e+02 7.8273260955657335e+01 0 -1 0
42 1 10 -5.9999999999999998e-02 1.5588777639047200e+02 2.6212606480358153e+02 7.8709459744186717e+01 0 -1 0
43 1 9 5.9999999999999998e-02 1.5582171953522780e+02 2.6269457088503873e+02 7.9637111255920232e+01 0 -1 0
56 1 9 5.9999999999999998e-02 1.5517147094355880e+02 2.6453366598060603e+02 7.7316828495809773e+01 0 -1 0
51 1 11 -1.2000000000000000e-01 1.5670269728698574e+02 2.6304044051366753e+02 7.7715492565808574e+01 0 -1 0
52 1 9 5.9999999999999998e-02 1.5776804879332099e+02 2.6288563977576575e+02 7.7886264076366743e+01 0 -1 0
53 1 9 5.9999999999999998e-02 1.5662611790788691e+02 2.6249506882775017e+02 7.6774851656140086e+01 0 -1 0
55 1 9 5.9999999999999998e-02 1.5601207180984306e+02 2.6489724763062975e+02 7.8725178808612299e+01 0 -1 0
54 1 11 -1.2000000000000000e-01 1.5618512158359556e+02 2.6451983043858388e+02 7.7717354348426696e+01 0 -1 0
62 1 9 5.9999999999999998e-02 1.5768810859721955e+02 2.6755719033361390e+02 7.6690987284336387e+01 0 -1 0
61 1 9 5.9999999999999998e-02 1.5669054154889372e+02 2.6718699623310346e+02 7.8153091943174161e+01 0 -1 0
60 1 12 -1.7999999999999999e-01 1.5686646952123778e+02 2.6696900565300712e+02 7.7099702402482563e+01 0 -1 0
59 1 9 5.9999999999999998e-02 1.5709464130858740e+02 2.6522149065590219e+02 7.5805224083144665e+01 0 -1 0
57 1 11 -1.2000000000000000e-01 1.5714648793252036e+02 2.6539779837679390e+02 7.6879620580172343e+01 0 -1 0
63 1 9 5.9999999999999998e-02 1.5593800814807636e+02 2.6720109999615107e+02 7.6577982280204296e+01 0 -1 0
58 1 9 5.9999999999999998e-02 1.5815447311635074e+02 2.6515392507684339e+02 7.7215167488218313e+01 0 -1 0
12 1 7 1.4210000000000000e-01 1.5936019228154291e+02 2.6410333945490663e+02 7.9326417928830068e+01 0 -1 0
321 1 9 5.9999999999999998e-02 1.5618961605679982e+02 2.2888313960922511e+02 8.2306807486474895e+01 0 -1 0
314 1 9 5.9999999999999998e-02 1.5588773682758040e+02 2.2986840831060812e+02 7.9788566531739150e+01 0 -1 0
322 1 9 5.9999999999999998e-02 1.5656684479707093e+02 2.2777233467083846e+02 8.0961014798465470e+01 0 -1 0
320 1 11 -1.2000000000000000e-01 1.5698691550336895e+02 2.2845680756157543e+02 8.1697993408734803e+01 0 -1 0
328 1 9 5.9999999999999998e-02 1.5653186185784352e+02 2.2587805165330880e+02 8.2726737328173982e+01 0 -1 0
326 1 11 -1.2000000000000000e-01 1.5684717854007937e+02 2.2664636943467593e+02 8.3432685760499808e+01 0 -1 0
325 1 9 5.9999999999999998e-02 1.5859296190324943e+02 2.2708752224597109e+02 8.2097154475686011e+01 0 -1 0
310 1 9 5.9999999999999998e-02 1.5927157755373707e+02 2.2795540921208053e+02 8.0009377355246571e+01 0 -1 0
311 1 10 -5.9999999999999998e-02 1.5777479209294688e+02 2.2943316077589390e+02 8.0892017527484143e+01 0 -1 0
308 1 8 4.4400000000000002e-02 1.5872789904543058e+02 2.2886590700616372e+02 7.9757370489307320e+01 0 -1 0
298 1 4 1.7790000000000000e-01 1.6027939854072133e+02 2.3001327455781538e+02 7.9586660044496583e+01 0 -1 0
333 1 8 4.4400000000000002e-02 1.6191242825731686e+02 2.2940544911918147e+02 8.0438954866903742e+01 0 -1 0
338 1 11 -1.2000000000000000e-01 1.6216134297912734e+02 2.2712765353540030e+02 7.9183150482084244e+01 0 -1 0
339 1 9 5.9999999999999998e-02 1.6129414242324509e+02 2.2740763035048269e+02 7.8585090026437072e+01 0 -1 0
309 1 9 5.9999999999999998e-02 1.5826909024545191e+02 2.2880826803077426e+02 7.8770318168674180e+01 0 -1 0
334 1 9 5.9999999999999998e-02 1.6163285351071261e+02 2.2892462195665519e+02 8.1376367933793432e+01 0 -1 0
340 1 9 5.9999999999999998e-02 1.6183289990798136e+02 2.2657628803536849e+02 8.0064184668476344e+01 0 -1 0
335 1 9 5.9999999999999998e-02 1.6238704928510793e+02 2.3034202833087036e+02 8.0731622361467089e+01 0 -1 0
323 1 11 -1.2000000000000000e-01 1.5777636376094020e+02 2.2757964565617860e+02 8.2625436618888912e+01 0 -1 0
353 1 9 5.9999999999999998e-02 1.6621750241451477e+02 2.2837370861838795e+02 8.2413621564230837e+01 0 -1 0
351 1 11 -1.2000000000000000e-01 1.6577769999038708e+02 2.2744304058116234e+02 8.2055109594511350e+01 0 -1 0
350 1 9 5.9999999999999998e-02 1.6379929913048895e+02 2.2833774820914152e+02 8.2362883804399345e+01 0 -1 0
349 1 9 5.9999999999999998e-02 1.6368915865603532e+02 2.2684893192910812e+02 8.1442716962841274e+01 0 -1 0
348 1 11 -1.2000000000000000e-01 1.6427400847690723e+02 2.2775990989378235e+02 8.1569880682851959e+01 0 -1 0
357 1 9 5.9999999999999998e-02 1.6672703418693655e+02 2.2620286506431523e+02 8.3429549659698552e+01 0 -1 0
354 1 12 -1.7999999999999999e-01 1.6573780628712473e+02 2.2630283754874557e+02 8.2982857763453168e+01 0 -1 0
355 1 9 5.9999999999999998e-02 1.6498736828747360e+02 2.2640588202685993e+02 8.3766646409791420e+01 0 -1 0
356 1 9 5.9999999999999998e-02 1.6562171367724207e+02 2.2532501784615650e+02 8.2515427400992621e+01 0 -1 0
482 1 9 5.9999999999999998e-02 1.7338607252625309e+02 2.2917077686416127e+02 7.7326034973456416e+01 0 -1 0
481 1 11 -1.2000000000000000e-01 1.7374979707592715e+02 2.2954571029117042e+02 7.8282711279930197e+01 0 -1 0
483 1 9 5.9999999999999998e-02 1.7479532165564663e+02 2.2929089303655050e+02 7.8456050602716317e+01 0 -1 0
489 1 9 5.9999999999999998e-02 1.7385455599792957e+02 2.2720290271299999e+02 7.9967965071725246e+01 0 -1 0
487 1 12 -1.7999999999999999e-01 1.7286148739992484e+02 2.2757165915185689e+02 7.9711189978452367e+01 0 -1 0
486 1 9 5.9999999999999998e-02 1.7326293546534015e+02 2.2963104131796936e+02 8.0275741532535989e+01 0 -1 0
484 1 11 -1.2000000000000000e-01 1.7287696986879760e+02 2.2904953740939055e+02 7.9438493794274223e+01 0 -1 0
485 1 9 5.9999999999999998e-02 1.7186735163829815e+02 2.2935616789020224e+02 7.9165091257960952e+01 0 -1 0
478 1 11 -1.2000000000000000e-01 1.7387382134228795e+02 2.3110484444487398e+02 7.8283736744004955e+01 0 -1 0
488 1 9 5.9999999999999998e-02 1.7217623010079072e+02 2.2747101873147980e+02 8.0552851395579154e+01 0 -1 0
490 1 9 5.9999999999999998e-02 1.7264429507378176e+02 2.2688510791536015e+02 7.8892914417631999e+01 0 -1 0
327 1 9 5.9999999999999998e-02 1.5593005172672090e+02 2.2707125556268105e+02 8.3840671546696200e+01 0 -1 0
324 1 9 5.9999999999999998e-02 1.5832127330069304e+02 2.2813665557435669e+02 8.3387613465022554e+01 0 -1 0
332 1 9 5.9999999999999998e-02 1.5689750767902854e+02 2.2533344355533936e+02 8.5192854779954885e+01 0 -1 0
300 1 6 -1.8620000000000000e-01 1.5989708701513899e+02 2.3177766855434672e+02 8.0008605750424820e+01 0 -1 0
297 1 3 -1.3239999999999999e-01 1.5950389216372818e+02 2.3256432260492912e+02 8.1142003420173523e+01 0 -1 0
265 1 14 1.5300000000000000e-01 1.5905645876799272e+02 2.3476831230448948e+02 8.2009777166182459e+01 0 -1 0
260 1 13 -1.1910000000000000e-01 1.5861307092428453e+02 2.3650188655543550e+02 8.1526727081627868e+01 0 -1 0
295 1 1 -4.7300000000000002e-02 1.5950924647201722e+02 2.3416546429625339e+02 7.9153224969491234e+01 0 -1 0
296 1 2 -5.7599999999999998e-02 1.5931559094992210e+02 2.3386847745692802e+02 8.0919549575936799e+01 0 -1 0
306 1 7 1.4210000000000000e-01 1.5941652017403678e+02 2.3209563912277051e+02 8.2111076136211409e+01 0 -1 0
266 1 15 -2.2200000000000000e-01 1.5922859980805131e+02 2.3467004715358181e+02 8.3340156161469963e+01 0 -1 0
329 1 12 -1.7999999999999999e-01 1.5759591059028054e+02 2.2588894670234259e+02 8.4566955722356909e+01 0 -1 0
330 1 9 5.9999999999999998e-02 1.5814673306992057e+02 2.2652782207297312e+02 8.5257269321479725e+01 0 -1 0
261 1 14 1.5300000000000000e-01 1.5876212162517780e+02 2.3701735634150896e+02 8.3190564129122833e+01 0 -1 0
331 1 9 5.9999999999999998e-02 1.5828704887724595e+02 2.2515627114323743e+02 8.4150285087986987e+01 0 -1 0
262 1 15 -2.2200000000000000e-01 1.5894314740982546e+02 2.3590113923872445e+02 8.4029823676183327e+01 0 -1 0
269 1 18 -4.8999999999999999e-01 1.5996711262911222e+02 2.3258702313455558e+02 8.4249216237226378e+01 0 -1 0
267 1 16 6.2900000000000000e-01 1.5963059169811731e+02 2.3373818735846581e+02 8.4356008698638561e+01 0 -1 0
289 1 9 5.9999999999999998e-02 1.6480487569569624e+02 2.3672087149555571e+02 8.3303784457878763e+01 0 -1 0
538 1 9 5.9999999999999998e-02 1.7058972319240993e+02 2.3628229751002277e+02 8.3433227793699658e+01 0 -1 0
290 1 9 5.9999999999999998e-02 1.6609673441611667e+02 2.3626117148380922e+02 8.4148467149899190e+01 0 -1 0
480 1 9 5.9999999999999998e-02 1.7411948871725315e+02 2.3153882236466615e+02 7.9252968945653848e+01 0 -1 0
540 1 9 5.9999999999999998e-02 1.7213326739576499e+02 2.3552689665536406e+02 8.3104870199186109e+01 0 -1 0
541 1 11 -1.2000000000000000e-01 1.7450523960060599e+02 2.3761705637556577e+02 8.2475267817115778e+01 0 -1 0
534 1 11 -1.2000000000000000e-01 1.7193645765500426e+02 2.3783461729765290e+02 8.2965436646906014e+01 0 -1 0
539 1 9 5.9999999999999998e-02 1.7126662803292155e+02 2.3615861074170277e+02 8.1756427040045054e+01 0 -1 0
537 1 12 -1.7999999999999999e-01 1.7148042477819439e+02 2.3634786056960766e+02 8.2808365942821538e+01 0 -1 0
536 1 9 5.9999999999999998e-02 1.7204647653067931e+02 2.3805825328082943e+02 8.4026560186741719e+01 0 -1 0
543 1 9 5.9999999999999998e-02 1.7431885084917960e+02 2.3693132555017996e+02 8.3301786099487785e+01 0 -1 0
549 1 9 5.9999999999999998e-02 1.7642517264827592e+02 2.3541759024132509e+02 8.2070440809686360e+01 0 -1 0
546 1 9 5.9999999999999998e-02 1.7440653063673338e+02 2.3633069237687812e+02 8.0816472122838135e+01 0 -1 0
544 1 11 -1.2000000000000000e-01 1.7513462533044230e+02 2.3705154667848223e+02 8.1188422647923943e+01 0 -1 0
533 1 9 5.9999999999999998e-02 1.7297346537060403e+02 2.3805955081203518e+02 8.1017850957717357e+01 0 -1 0
542 1 9 5.9999999999999998e-02 1.7520970421991765e+02 2.3823246222466562e+02 8.3034825877262691e+01 0 -1 0
552 1 9 5.9999999999999998e-02 1.7644090768684180e+02 2.3481210529110282e+02 7.9681432012895897e+01 0 -1 0
547 1 11 -1.2000000000000000e-01 1.7645155178239042e+02 2.3622721792682290e+02 8.1341121139070268e+01 0 -1 0
553 1 9 5.9999999999999998e-02 1.7714163157645390e+02 2.3635791412842349e+02 7.9228553350565278e+01 0 -1 0
550 1 12 -1.7999999999999999e-01 1.7705765337868661e+02 2.3563587475792090e+02 8.0040776725115890e+01 0 -1 0
551 1 9 5.9999999999999998e-02 1.7809248926712496e+02 2.3532876975664740e+02 8.0192108456960938e+01 0 -1 0
548 1 9 5.9999999999999998e-02 1.7723419209516035e+02 2.3681181390332500e+02 8.1824672258667562e+01 0 -1 0
197 1 1 -4.7300000000000002e-02 1.5664700840548065e+02 2.4320688333971552e+02 8.3157452095230056e+01 0 -1 0
258 1 9 5.9999999999999998e-02 1.6030616997469329e+02 2.4051053453926838e+02 8.1139591371564762e+01 0 -1 0
256 1 12 -1.7999999999999999e-01 1.6052697719669192e+02 2.4157023388525144e+02 8.1011598621668611e+01 0 -1 0
203 1 1 -4.7300000000000002e-02 1.5776738007204816e+02 2.3961087667319140e+02 8.2712349877717415e+01 0 -1 0
252 1 9 5.9999999999999998e-02 1.6369289255880145e+02 2.4162215338243035e+02 8.2642087836090511e+01 0 -1 0
250 1 11 -1.2000000000000000e-01 1.6261067436040150e+02 2.4149231339496248e+02 8.2648831965625703e+01 0 -1 0
251 1 9 5.9999999999999998e-02 1.6242691413336473e+02 2.4041946865653435e+02 8.2706593907050575e+01 0 -1 0
253 1 11 -1.2000000000000000e-01 1.6203879435113879e+02 2.4195639550223743e+02 8.1219354923835198e+01 0 -1 0
254 1 9 5.9999999999999998e-02 1.6229188242842332e+02 2.4300145129205200e+02 8.1040735629807443e+01 0 -1 0
255 1 9 5.9999999999999998e-02 1.6264638482734972e+02 2.4142277542386336e+02 8.0488476330420767e+01 0 -1 0
247 1 11 -1.2000000000000000e-01 1.6193345822315408e+02 2.4229058754848941e+02 8.3851917360262391e+01 0 -1 0
248 1 9 5.9999999999999998e-02 1.6087652152185825e+02 2.4237882946386733e+02 8.3600524890080493e+01 0 -1 0
249 1 9 5.9999999999999998e-02 1.6221292347558676e+02 2.4334380610994364e+02 8.3824901911735722e+01 0 -1 0
204 1 2 -5.7599999999999998e-02 1.5875777631267619e+02 2.3842333212574519e+02 8.3521515313370088e+01 0 -1 0
206 1 5 1.1110000000000000e-01 1.5815773505835296e+02 2.4083132184739793e+02 8.3870387495971343e+01 0 -1 0
201 1 5 1.1110000000000000e-01 1.5770570977475197e+02 2.4223685690613868e+02 8.4018938799034586e+01 0 -1 0
202 1 6 -1.8620000000000000e-01 1.5833965812320380e+02 2.4290160132660921e+02 8.5067701207363385e+01 0 -1 0
239 1 9 5.9999999999999998e-02 1.6195782275929000e+02 2.4068656137717952e+02 8.5328789660225183e+01 0 -1 0
238 1 10 -5.9999999999999998e-02 1.6220754293598051e+02 2.4173867896378675e+02 8.5191718812465709e+01 0 -1 0
207 1 6 -1.8620000000000000e-01 1.5911433922599818e+02 2.4037177889431240e+02 8.4807532665070752e+01 0 -1 0
205 1 3 -1.3239999999999999e-01 1.5948737842620014e+02 2.3898092436171495e+02 8.4586868839051647e+01 0 -1 0
209 1 7 1.4210000000000000e-01 1.6012492041545562e+02 2.3848328942212305e+02 8.5302619968169509e+01 0 -1 0
294 1 9 5.9999999999999998e-02 1.6630554989688551e+02 2.3854700298645719e+02 8.2949419756929558e+01 0 -1 0
288 1 11 -1.2000000000000000e-01 1.6532435922665104e+02 2.3702769221362149e+02 8.4211582846344982e+01 0 -1 0
293 1 9 5.9999999999999998e-02 1.6496883257521719e+02 2.3927573809233945e+02 8.3955138624690449e+01 0 -1 0
292 1 9 5.9999999999999998e-02 1.6644829200605213e+02 2.3884329982103765e+02 8.4621318005070577e+01 0 -1 0
291 1 12 -1.7999999999999999e-01 1.6573148089354399e+02 2.3850112637448265e+02 8.3874860261471255e+01 0 -1 0
242 1 9 5.9999999999999998e-02 1.6424288209584168e+02 2.4133172185536145e+02 8.4884418110729300e+01 0 -1 0
497 1 1 -4.7300000000000002e-02 1.6791010104586812e+02 2.4069144827008094e+02 8.1161834515703561e+01 0 -1 0
498 1 2 -5.7599999999999998e-02 1.6833185667488516e+02 2.4170764231233142e+02 8.2486612350482545e+01 0 -1 0
500 1 5 1.1110000000000000e-01 1.6949601095415142e+02 2.4029485346527625e+02 8.0734504243170250e+01 0 -1 0
499 1 3 -1.3239999999999999e-01 1.6971087272574476e+02 2.4186709567933602e+02 8.2504047395673155e+01 0 -1 0
555 1 14 1.5300000000000000e-01 1.6747970924477306e+02 2.4262157303378547e+02 8.3160890469993944e+01 0 -1 0
556 1 15 -2.2200000000000000e-01 1.6737997907741709e+02 2.4313559671765466e+02 8.4476558658751941e+01 0 -1 0
557 1 16 6.2900000000000000e-01 1.6814332664073433e+02 2.4296945606791292e+02 8.5710269005117553e+01 0 -1 0
562 1 18 -4.8999999999999999e-01 1.6911118567297507e+02 2.4221000194780561e+02 8.5881052005868668e+01 0 -1 0
503 1 7 1.4210000000000000e-01 1.7017943956839528e+02 2.4256336384063667e+02 8.3183794232022933e+01 0 -1 0
285 1 11 -1.2000000000000000e-01 1.6442311972965013e+02 2.3703609504603261e+02 8.5512417618150678e+01 0 -1 0
286 1 9 5.9999999999999998e-02 1.6341936200154373e+02 2.3745521751892699e+02 8.5442367254084729e+01 0 -1 0
240 1 11 -1.2000000000000000e-01 1.6365346564881719e+02 2.4173013482971953e+02 8.5710223953253404e+01 0 -1 0
241 1 9 5.9999999999999998e-02 1.6411656088482800e+02 2.4271456196715002e+02 8.5777648074318705e+01 0 -1 0
243 1 12 -1.7999999999999999e-01 1.6389698990612715e+02 2.4087785238210137e+02 8.6971369435933099e+01 0 -1 0
245 1 9 5.9999999999999998e-02 1.6489734944819378e+02 2.4104490373251639e+02 8.7370712189366458e+01 0 -1 0
244 1 9 5.9999999999999998e-02 1.6369184168323355e+02 2.3983614616317723e+02 8.6724666447683816e+01 0 -1 0
535 1 9 5.9999999999999998e-02 1.7116110111116492e+02 2.3851776169293876e+02 8.2618686057538852e+01 0 -1 0
517 1 9 5.9999999999999998e-02 1.7529994046245673e+02 2.4133075980472091e+02 7.9492019108647639e+01 0 -1 0
505 1 9 5.9999999999999998e-02 1.7178144622229499e+02 2.4287165634040684e+02 7.9983526831501862e+01 0 -1 0
504 1 8 4.4400000000000002e-02 1.7268379168479058e+02 2.4227496622713610e+02 8.0117069239808060e+01 0 -1 0
545 1 9 5.9999999999999998e-02 1.7519467806263617e+02 2.3782751041250546e+02 8.0425288322191250e+01 0 -1 0
531 1 9 5.9999999999999998e-02 1.7419245854437719e+02 2.4017799305604498e+02 8.1787738011516112e+01 0 -1 0
494 1 4 1.7790000000000000e-01 1.7206622934531225e+02 2.4066166195383735e+02 8.0893544291895708e+01 0 -1 0
529 1 8 4.4400000000000002e-02 1.7319754359366698e+02 2.3983025944053358e+02 8.2065812771702525e+01 0 -1 0
532 1 10 -5.9999999999999998e-02 1.7317335232403369e+02 2.3831891748819953e+02 8.2057501924698158e+01 0 -1 0
501 1 6 -1.8620000000000000e-01 1.7035228687747960e+02 2.4099268232530633e+02 8.1586092903034086e+01 0 -1 0
530 1 9 5.9999999999999998e-02 1.7308175709068061e+02 2.4028541815961137e+02 8.3049440763567716e+01 0 -1 0
506 1 9 5.9999999999999998e-02 1.7338696002753156e+02 2.4286735805582919e+02 8.0702497462094669e+01 0 -1 0
518 1 9 5.9999999999999998e-02 1.7413603860118380e+02 2.4009497188441142e+02 7.9235515440666802e+01 0 -1 0
177 1 9 5.9999999999999998e-02 1.5244499277078052e+02 2.4606484054491577e+02 8.0087710797135912e+01 0 -1 0
166 1 17 -3.9700000000000002e-01 1.5476775366491080e+02 2.4720273810656906e+02 8.0870375506860128e+01 0 -1 0
171 1 18 -4.8999999999999999e-01 1.5568622594430457e+02 2.4511483799597016e+02 8.0761753197787115e+01 0 -1 0
170 1 18 -4.8999999999999999e-01 1.5436978274159489e+02 2.4944116295212248e+02 8.1383236921503155e+01 0 -1 0
165 1 16 6.2900000000000000e-01 1.5476235662276872e+02 2.4829154898993568e+02 8.1747369326862923e+01 0 -1 0
169 1 16 6.2900000000000000e-01 1.5546454836885033e+02 2.4613382672561426e+02 8.1430669477685782e+01 0 -1 0
106 1 2 -5.7599999999999998e-02 1.5525826439702598e+02 2.4960377885941614e+02 8.4886910510486189e+01 0 -1 0
164 1 15 -2.2200000000000000e-01 1.5536428551302129e+02 2.4781367244934142e+02 8.3050316114784962e+01 0 -1 0
163 1 14 1.5300000000000000e-01 1.5558528518914142e+02 2.4829544124083384e+02 8.4324956355974280e+01 0 -1 0
168 1 15 -2.2200000000000000e-01 1.5592207098948558e+02 2.4653323676438592e+02 8.2786032086277118e+01 0 -1 0
167 1 14 1.5300000000000000e-01 1.5662269307937143e+02 2.4600013792945151e+02 8.3873914386643804e+01 0 -1 0
198 1 2 -5.7599999999999998e-02 1.5709052684474898e+02 2.4468498525615641e+02 8.4106666791589689e+01 0 -1 0
162 1 13 -1.1910000000000000e-01 1.5656897897382842e+02 2.4706128184136060e+02 8.5187598781359270e+01 0 -1 0
257 1 9 5.9999999999999998e-02 1.6009957461324541e+02 2.4186749699962897e+02 8.0053965255442478e+01 0 -1 0
259 1 9 5.9999999999999998e-02 1.5990721875297632e+02 2.4218276955340281e+02 8.1666426472394534e+01 0 -1 0
592 1 4 1.7790000000000000e-01 1.6233582404548127e+02 2.4790789947224582e+02 8.0864394245063281e+01 0 -1 0
599 1 6 -1.8620000000000000e-01 1.6129021978589094e+02 2.4859969779247953e+02 8.2314214317368368e+01 0 -1 0
598 1 5 1.1110000000000000e-01 1.6162122519187841e+02 2.4794531484966748e+02 8.3501548020720151e+01 0 -1 0
595 1 1 -4.7300000000000002e-02 1.6078592624750971e+02 2.4856530946518180e+02 8.4849777019613057e+01 0 -1 0
593 1 5 1.1110000000000000e-01 1.6265908147214552e+02 2.4699237313409205e+02 8.3340514759943090e+01 0 -1 0
594 1 6 -1.8620000000000000e-01 1.6323187274643377e+02 2.4673296880507004e+02 8.2082886872148322e+01 0 -1 0
589 1 1 -4.7300000000000002e-02 1.6328789481863367e+02 2.4590697178860219e+02 8.4561918509442037e+01 0 -1 0
237 1 9 5.9999999999999998e-02 1.6131178140783379e+02 2.4348471649952512e+02 8.6270447101287687e+01 0 -1 0
199 1 3 -1.3239999999999999e-01 1.5788998281340795e+02 2.4428906212678058e+02 8.5111887134605439e+01 0 -1 0
208 1 7 1.4210000000000000e-01 1.5813876599418703e+02 2.4502626653245818e+02 8.5860910894716554e+01 0 -1 0
1093 1 9 5.9999999999999998e-02 1.6206736164064372e+02 2.4998365026690871e+02 8.6852095904774814e+01 0 -1 0
1156 1 9 5.9999999999999998e-02 1.6846741475202896e+02 2.4337196243167136e+02 7.9777925418994855e+01 0 -1 0
554 1 13 -1.1910000000000000e-01 1.6623387054795629e+02 2.4340742083783752e+02 8.2214468120539124e+01 0 -1 0
1150 1 18 -4.8999999999999999e-01 1.6718188434586261e+02 2.4691349141247952e+02 8.0555388091395955e+01 0 -1 0
1146 1 17 -3.9700000000000002e-01 1.6912014110362207e+02 2.4555245464152165e+02 8.0774934465971967e+01 0 -1 0
600 1 7 1.4210000000000000e-01 1.6489728878858509e+02 2.4559192298239688e+02 8.1243309051817349e+01 0 -1 0
1145 1 16 6.2900000000000000e-01 1.6809485743998243e+02 2.4638850444864028e+02 8.1249398509438251e+01 0 -1 0
559 1 14 1.5300000000000000e-01 1.6553507263606045e+02 2.4437443194746410e+02 8.3597181916385054e+01 0 -1 0
560 1 15 -2.2200000000000000e-01 1.6633196905999162e+02 2.4407154493981142e+02 8.4683602455557860e+01 0 -1 0
1085 1 1 -4.7300000000000002e-02 1.6623985205622085e+02 2.4921821824722838e+02 8.2580513732940631e+01 0 -1 0
591 1 3 -1.3239999999999999e-01 1.6429032641567156e+02 2.4581052793754259e+02 8.2109454854470073e+01 0 -1 0
590 1 2 -5.7599999999999998e-02 1.6443756036284566e+02 2.4530143053373865e+02 8.3400773945096731e+01 0 -1 0
1087 1 3 -1.3239999999999999e-01 1.6629193595723672e+02 2.4861609600813148e+02 8.5099446097667595e+01 0 -1 0
1091 1 7 1.4210000000000000e-01 1.6663755781199782e+02 2.4803027741076747e+02 8.5938351398934657e+01 0 -1 0
1086 1 2 -5.7599999999999998e-02 1.6691723878132632e+02 2.4825798389735201e+02 8.3916627306785728e+01 0 -1 0
1143 1 14 1.5300000000000000e-01 1.6794388972559474e+02 2.4729410799484415e+02 8.3832630454162810e+01 0 -1 0
1144 1 15 -2.2200000000000000e-01 1.6847001756719243e+02 2.4664694347789924e+02 8.2709447514611227e+01 0 -1 0
1142 1 13 -1.1910000000000000e-01 1.6900027999432527e+02 2.4691957743883378e+02 8.5252131685429404e+01 0 -1 0
1148 1 15 -2.2200000000000000e-01 1.6964013271185590e+02 2.4582988234287552e+02 8.2998659444750018e+01 0 -1 0
561 1 16 6.2900000000000000e-01 1.6643411455355269e+02 2.4446554087556328e+02 8.6073816883245613e+01 0 -1 0
1147 1 14 1.5300000000000000e-01 1.7006586625280337e+02 2.4584522937402312e+02 8.4328280394151292e+01 0 -1 0
558 1 17 -3.9700000000000002e-01 1.6751705362896612e+02 2.4380209080388454e+02 8.6681136090706673e+01 0 -1 0
1151 1 18 -4.8999999999999999e-01 1.7117020846593877e+02 2.4465315614101826e+02 8.1532852818189411e+01 0 -1 0
1149 1 16 6.2900000000000000e-01 1.7015187878780233e+02 2.4523030818992092e+02 8.1733835655895561e+01 0 -1 0
1178 1 21 0.0000000000000000e+00 1.7091539256282863e+02 2.4538815761553070e+02 8.4813862988735835e+01 0 -1 0
932 1 9 5.9999999999999998e-02 1.4952654130683720e+02 2.5437098484657267e+02 8.2271781931516884e+01 0 -1 0
928 1 9 5.9999999999999998e-02 1.4711018836992491e+02 2.5508414122088644e+02 8.2647722249798221e+01 0 -1 0
669 1 9 5.9999999999999998e-02 1.5279218098665604e+02 2.5384728455191689e+02 8.1061926938855692e+01 0 -1 0
668 1 11 -1.2000000000000000e-01 1.5379237093987959e+02 2.5421265334407752e+02 8.0829062460300335e+01 0 -1 0
664 1 9 5.9999999999999998e-02 1.5640680635207306e+02 2.5465586910159499e+02 8.1243364791038616e+01 0 -1 0
662 1 19 8.9999999999999997e-02 1.5618884553431820e+02 2.5358844839435412e+02 8.1278093168398314e+01 0 -1 0
666 1 9 5.9999999999999998e-02 1.5450416385825230e+02 2.5220670361691791e+02 8.1120423427068829e+01 0 -1 0
665 1 11 -1.2000000000000000e-01 1.5473572950768701e+02 2.5322534257244936e+02 8.1431634011788617e+01 0 -1 0
667 1 9 5.9999999999999998e-02 1.5441079608341477e+02 2.5326169204732759e+02 8.2471440213998179e+01 0 -1 0
656 1 17 -3.9700000000000002e-01 1.5698825705551113e+02 2.5307454277764990e+02 8.2341678707703778e+01 0 -1 0
655 1 16 6.2900000000000000e-01 1.5768768322620988e+02 2.5187813582872585e+02 8.2340889960221048e+01 0 -1 0
105 1 1 -4.7300000000000002e-02 1.5442072479357071e+02 2.5094689211898836e+02 8.4167825794387952e+01 0 -1 0
661 1 18 -4.8999999999999999e-01 1.5677456558981766e+02 2.5499396476459683e+02 8.3713118138466285e+01 0 -1 0
99 1 1 -4.7300000000000002e-02 1.5358899246579372e+02 2.5461459087606548e+02 8.4824104231754376e+01 0 -1 0
100 1 2 -5.7599999999999998e-02 1.5389526241813809e+02 2.5579463501152850e+02 8.6133814464058148e+01 0 -1 0
103 1 5 1.1110000000000000e-01 1.5413680800616800e+02 2.5335070072509049e+02 8.5804272751470023e+01 0 -1 0
108 1 5 1.1110000000000000e-01 1.5448628649888141e+02 2.5196402030230695e+02 8.5552787622834202e+01 0 -1 0
659 1 16 6.2900000000000000e-01 1.5724177534902461e+02 2.5388402212172502e+02 8.3472038849734844e+01 0 -1 0
658 1 15 -2.2200000000000000e-01 1.5807697080882554e+02 2.5305089942125642e+02 8.4361465762015015e+01 0 -1 0
660 1 18 -4.8999999999999999e-01 1.5764872832881088e+02 2.5106637707381225e+02 8.1489200509463572e+01 0 -1 0
597 1 3 -1.3239999999999999e-01 1.6028698134407210e+02 2.4961564503521561e+02 8.2556692937190050e+01 0 -1 0
1044 1 13 -1.1910000000000000e-01 1.6080774795869840e+02 2.5384922748890159e+02 8.1110874620885269e+01 0 -1 0
1045 1 14 1.5300000000000000e-01 1.5985930266986543e+02 2.5534553778393922e+02 8.1178457985691523e+01 0 -1 0
596 1 2 -5.7599999999999998e-02 1.5994687838637708e+02 2.4972803729952622e+02 8.3863154076339754e+01 0 -1 0
1046 1 15 -2.2200000000000000e-01 1.6009068120714426e+02 2.5588928978109223e+02 8.2425883152012176e+01 0 -1 0
601 1 7 1.4210000000000000e-01 1.5986119458580862e+02 2.5020348219731261e+02 8.1756972293874369e+01 0 -1 0
1049 1 14 1.5300000000000000e-01 1.6160189841034131e+02 2.5402557684087373e+02 8.2696158323824108e+01 0 -1 0
1079 1 1 -4.7300000000000002e-02 1.6343002339919533e+02 2.5190222287666222e+02 8.2274189248658345e+01 0 -1 0
653 1 14 1.5300000000000000e-01 1.5930704811615715e+02 2.5093003589020182e+02 8.4295098151255601e+01 0 -1 0
1050 1 15 -2.2200000000000000e-01 1.6106406180121556e+02 2.5517415991562089e+02 8.3253090385255533e+01 0 -1 0
1080 1 2 -5.7599999999999998e-02 1.6244059291050527e+02 2.5296519074782026e+02 8.3207021938986713e+01 0 -1 0
654 1 15 -2.2200000000000000e-01 1.5845312160352711e+02 2.5181821071344572e+02 8.3644949996733999e+01 0 -1 0
657 1 14 1.5300000000000000e-01 1.5868657900325672e+02 2.5306822735314717e+02 8.5600903048585167e+01 0 -1 0
652 1 13 -1.1910000000000000e-01 1.5944053253100682e+02 2.5158219320257814e+02 8.5998853980885471e+01 0 -1 0
1090 1 7 1.4210000000000000e-01 1.6188192998555067e+02 2.5316951665124830e+02 8.5236975167648566e+01 0 -1 0
1081 1 3 -1.3239999999999999e-01 1.6247009967022751e+02 2.5259215780185221e+02 8.4539040227234210e+01 0 -1 0
1051 1 16 6.2900000000000000e-01 1.6121095555422858e+02 2.5597903424779426e+02 8.4510360861618622e+01 0 -1 0
1053 1 18 -4.8999999999999999e-01 1.6195257520055563e+02 2.5572117587079114e+02 8.5444043587843140e+01 0 -1 0
1084 1 6 -1.8620000000000000e-01 1.6348808581369761e+02 2.5159379630022821e+02 8.4776487599525055e+01 0 -1 0
1083 1 5 1.1110000000000000e-01 1.6417342340125964e+02 2.5111358994621293e+02 8.3625860151423595e+01 0 -1 0
1089 1 6 -1.8620000000000000e-01 1.6541051526965140e+02 2.4974050363751329e+02 8.5028999457643593e+01 0 -1 0
1088 1 5 1.1110000000000000e-01 1.6521158761616621e+02 2.5015031411451696e+02 8.3689894618544912e+01 0 -1 0
1131 1 9 5.9999999999999998e-02 1.6632557894693571e+02 2.5225882604964144e+02 8.4865232057488456e+01 0 -1 0
1137 1 9 5.9999999999999998e-02 1.6554656518736584e+02 2.5432873264648882e+02 8.3229384711151610e+01 0 -1 0
96 1 9 5.9999999999999998e-02 1.4467001470010138e+02 2.5765827272349003e+02 9.0984418551401532e+01 0 -1 0
95 1 12 -1.7999999999999999e-01 1.4534217437964764e+02 2.5812508548703659e+02 9.0264427087319575e+01 0 -1 0
92 1 11 -1.2000000000000000e-01 1.4569394250120763e+02 2.5947350828183579e+02 9.0877295660976230e+01 0 -1 0
93 1 9 5.9999999999999998e-02 1.4482376695804771e+02 2.6012667029045645e+02 9.0811920032878533e+01 0 -1 0
894 1 7 1.4210000000000000e-01 1.4584724705469543e+02 2.6101756028270580e+02 8.5405738163484315e+01 0 -1 0
90 1 9 5.9999999999999998e-02 1.4725788459232871e+02 2.6110040352561509e+02 9.0812276437596168e+01 0 -1 0
926 1 11 -1.2000000000000000e-01 1.4785964705207988e+02 2.5582178848508818e+02 8.2360863057642803e+01 0 -1 0
681 1 9 5.9999999999999998e-02 1.5123157827352964e+02 2.5791248219397744e+02 8.3226175425631041e+01 0 -1 0
675 1 9 5.9999999999999998e-02 1.5195347371778573e+02 2.5589174591407880e+02 8.2216793257293531e+01 0 -1 0
935 1 9 5.9999999999999998e-02 1.4961381951775689e+02 2.5531084848484716e+02 8.4303915583912655e+01 0 -1 0
934 1 9 5.9999999999999998e-02 1.4794806994138440e+02 2.5535124422639387e+02 8.5112199572498724e+01 0 -1 0
942 1 12 -1.7999999999999999e-01 1.4910015025556112e+02 2.5531038253577233e+02 8.7915559334413018e+01 0 -1 0
943 1 9 5.9999999999999998e-02 1.4917173104004462e+02 2.5426295046713065e+02 8.7622536342154632e+01 0 -1 0
945 1 9 5.9999999999999998e-02 1.4805273325179201e+02 2.5559349292242129e+02 8.8019800245264889e+01 0 -1 0
922 1 9 5.9999999999999998e-02 1.4603304050462370e+02 2.5682600195030500e+02 8.4170615976617086e+01 0 -1 0
98 1 9 5.9999999999999998e-02 1.4501199997230481e+02 2.5818397079422311e+02 8.9227307326346349e+01 0 -1 0
940 1 9 5.9999999999999998e-02 1.5081051839904794e+02 2.5544029693743153e+02 8.6827163007774274e+01 0 -1 0
97 1 9 5.9999999999999998e-02 1.4629487648889372e+02 2.5761003725585010e+02 9.0141204484765012e+01 0 -1 0
89 1 11 -1.2000000000000000e-01 1.4688654979484113e+02 2.6024536953868829e+02 9.0247362624381211e+01 0 -1 0
91 1 9 5.9999999999999998e-02 1.4654521804881000e+02 2.6074733681325534e+02 8.9342033128563116e+01 0 -1 0
680 1 11 -1.2000000000000000e-01 1.5147810445519133e+02 2.5847349518266316e+02 8.2324738086512340e+01 0 -1 0
933 1 11 -1.2000000000000000e-01 1.4878278716366015e+02 2.5590555202879659e+02 8.4683142365709131e+01 0 -1 0
941 1 9 5.9999999999999998e-02 1.5034035068031849e+02 2.5696215090449101e+02 8.7534380568604504e+01 0 -1 0
939 1 11 -1.2000000000000000e-01 1.4996443260782760e+02 2.5611414398752629e+02 8.6961956011918872e+01 0 -1 0
924 1 10 -5.9999999999999998e-02 1.4819351329844324e+02 2.5670808128447140e+02 8.3537002147444781e+01 0 -1 0
925 1 9 5.9999999999999998e-02 1.4894760951264792e+02 2.5745209761049875e+02 8.3280333866726139e+01 0 -1 0
888 1 6 -1.8620000000000000e-01 1.4675192192243406e+02 2.6046891675579104e+02 8.3411203989154018e+01 0 -1 0
936 1 11 -1.2000000000000000e-01 1.4931675584393778e+02 2.5679984964267936e+02 8.5752921910182778e+01 0 -1 0
938 1 9 5.9999999999999998e-02 1.5010573965860667e+02 2.5742202723940892e+02 8.5330429790930197e+01 0 -1 0
921 1 8 4.4400000000000002e-02 1.4689091438098822e+02 2.5746702447805194e+02 8.3967533368513131e+01 0 -1 0
683 1 12 -1.7999999999999999e-01 1.5172102708558117e+02 2.5990872956207937e+02 8.2816246654542169e+01 0 -1 0
686 1 9 5.9999999999999998e-02 1.5077730047459559e+02 2.6024517147432471e+02 8.3245533211248627e+01 0 -1 0
923 1 9 5.9999999999999998e-02 1.4699979043609289e+02 2.5801802293515914e+02 8.4901688978180445e+01 0 -1 0
937 1 9 5.9999999999999998e-02 1.4857681247131455e+02 2.5744822612653809e+02 8.6222167835397343e+01 0 -1 0
85 1 9 5.9999999999999998e-02 1.4920987678661172e+02 2.6055383974010283e+02 8.8473072656543849e+01 0 -1 0
685 1 9 5.9999999999999998e-02 1.5248174307670536e+02 2.5989053221297951e+02 8.3596682470043348e+01 0 -1 0
4 1 4 1.7790000000000000e-01 1.5788305678123868e+02 2.6120636340113867e+02 8.0563306361643839e+01 0 -1 0
671 1 11 -1.2000000000000000e-01 1.5395191966146459e+02 2.5567202356471805e+02 8.1366173383540698e+01 0 -1 0
672 1 9 5.9999999999999998e-02 1.5443439805493546e+02 2.5569454479607549e+02 8.2343315847004121e+01 0 -1 0
678 1 9 5.9999999999999998e-02 1.5354053485390173e+02 2.5793365054354416e+02 8.2397466210454468e+01 0 -1 0
673 1 9 5.9999999999999998e-02 1.5470716297091741e+02 2.5619777285926835e+02 8.0781968615501768e+01 0 -1 0
684 1 9 5.9999999999999998e-02 1.5194658873877853e+02 2.6054088918881399e+02 8.1957412467547456e+01 0 -1 0
674 1 11 -1.2000000000000000e-01 1.5260284033994972e+02 2.5635681149638236e+02 8.1475080982478644e+01 0 -1 0
11 1 6 -1.8620000000000000e-01 1.5706059755506007e+02 2.6098348753224855e+02 8.2249137688473638e+01 0 -1 0
679 1 9 5.9999999999999998e-02 1.5289996882402161e+02 2.5836003850627634e+02 8.0788045341705839e+01 0 -1 0
677 1 11 -1.2000000000000000e-01 1.5268632188266392e+02 2.5784735478374068e+02 8.1725920803291018e+01 0 -1 0
13 1 7 1.4210000000000000e-01 1.5610239844298042e+02 2.5903198227295911e+02 8.2343324530527880e+01 0 -1 0
9 1 3 -1.3239999999999999e-01 1.5628818946397584e+02 2.5995010880714534e+02 8.2880842310457638e+01 0 -1 0
69 1 14 1.5300000000000000e-01 1.5417336997182926e+02 2.5720568244881514e+02 8.5984023729628092e+01 0 -1 0
8 1 2 -5.7599999999999998e-02 1.5585113472439522e+02 2.6034594842356415e+02 8.4187084339420707e+01 0 -1 0
7 1 1 -4.7300000000000002e-02 1.5629821792138111e+02 2.6204984027651597e+02 8.4508316887717086e+01 0 -1 0
72 1 18 -4.8999999999999999e-01 1.5469145092134525e+02 2.6173517670779893e+02 8.7408808369422744e+01 0 -1 0
66 1 15 -2.2200000000000000e-01 1.5464477220279511e+02 2.5948187002092232e+02 8.6320677457340366e+01 0 -1 0
70 1 15 -2.2200000000000000e-01 1.5418326218123889e+02 2.5828741868059404e+02 8.6849652793772322e+01 0 -1 0
65 1 14 1.5300000000000000e-01 1.5521234939146333e+02 2.5939259105380631e+02 8.5040250549111377e+01 0 -1 0
64 1 13 -1.1910000000000000e-01 1.5514361514809747e+02 2.5762037509164082e+02 8.4622701402512405e+01 0 -1 0
16 1 9 5.9999999999999998e-02 1.5904457218998175e+02 2.5915630678661319e+02 8.0214792209278315e+01 0 -1 0
14 1 8 4.4400000000000002e-02 1.5942902614124631e+02 2.6015939029328416e+02 8.0399503816401392e+01 0 -1 0
23 1 9 5.9999999999999998e-02 1.6319796928132797e+02 2.5909583075110100e+02 8.0556482471627007e+01 0 -1 0
20 1 9 5.9999999999999998e-02 1.6195005982729379e+02 2.6109312300160002e+02 8.0715389167375932e+01 0 -1 0
1056 1 9 5.9999999999999998e-02 1.5918547804570892e+02 2.5839143092945255e+02 8.5558400252495758e+01 0 -1 0
1052 1 18 -4.8999999999999999e-01 1.5880297960887577e+02 2.5791537112884987e+02 8.2835945859100022e+01 0 -1 0
15 1 9 5.9999999999999998e-02 1.5987031273527984e+02 2.6009780212266679e+02 8.1394276665231715e+01 0 -1 0
1067 1 9 5.9999999999999998e-02 1.6514548692994555e+02 2.5966680886430163e+02 8.3171874967578049e+01 0 -1 0
1047 1 16 6.2900000000000000e-01 1.5963968310183225e+02 2.5705519149025031e+02 8.3171069619931060e+01 0 -1 0
1064 1 9 5.9999999999999998e-02 1.6284768451509626e+02 2.6041671399885342e+02 8.3012460981106187e+01 0 -1 0
1048 1 17 -3.9700000000000002e-01 1.6032634629078430e+02 2.5710126478488979e+02 8.4382241156868758e+01 0 -1 0
1054 1 19 8.9999999999999997e-02 1.6023580855955501e+02 2.5816158238845600e+02 8.5379304030463089e+01 0 -1 0
1055 1 9 5.9999999999999998e-02 1.6058226312747340e+02 2.5774510676748912e+02 8.6325146135799073e+01 0 -1 0
1058 1 9 5.9999999999999998e-02 1.6063826999512071e+02 2.5977229403156520e+02 8.3968355205080002e+01 0 -1 0
1061 1 9 5.9999999999999998e-02 1.6278187145891144e+02 2.5822075719111649e+02 8.4134102651411666e+01 0 -1 0
1060 1 11 -1.2000000000000000e-01 1.6253792563498547e+02 2.5910249521350897e+02 8.4726663602759928e+01 0 -1 0
1063 1 11 -1.2000000000000000e-01 1.6321616935732143e+02 2.6027497772873716e+02 8.4028448097072740e+01 0 -1 0
1065 1 9 5.9999999999999998e-02 1.6307792866159195e+02 2.6120761044044445e+02 8.4575426816839240e+01 0 -1 0
1062 1 9 5.9999999999999998e-02 1.6296177492891258e+02 2.5896467287116849e+02 8.5721377751806926e+01 0 -1 0
1057 1 11 -1.2000000000000000e-01 1.6102947340923731e+02 2.5936419602552212e+02 8.4900297213873657e+01 0 -1 0
1059 1 9 5.9999999999999998e-02 1.6104131202838983e+02 2.6019492326156444e+02 8.5605883563177827e+01 0 -1 0
1066 1 11 -1.2000000000000000e-01 1.6476418719696113e+02 2.6028746137603144e+02 8.3982739304706982e+01 0 -1 0
1068 1 9 5.9999999999999998e-02 1.6515757380363041e+02 2.5995204095963527e+02 8.4942343453612494e+01 0 -1 0
857 1 18 -4.8999999999999999e-01 1.4448878997574641e+02 2.6260760820764381e+02 8.6772470405034483e+01 0 -1 0
866 1 9 5.9999999999999998e-02 1.4499225875363240e+02 2.6612423314586448e+02 8.7814608627019950e+01 0 -1 0
865 1 9 5.9999999999999998e-02 1.4347342334605497e+02 2.6544787974482432e+02 8.7416392918149697e+01 0 -1 0
864 1 11 -1.2000000000000000e-01 1.4396954961376545e+02 2.6604326563603291e+02 8.8182861683030993e+01 0 -1 0
860 1 9 5.9999999999999998e-02 1.4321475464465200e+02 2.6315137430415029e+02 8.8974702123921801e+01 0 -1 0
858 1 19 8.9999999999999997e-02 1.4409091818246810e+02 2.6364807457636147e+02 8.9391507568874445e+01 0 -1 0
852 1 17 -3.9700000000000002e-01 1.4536097711204937e+02 2.6348448601826288e+02 8.8736524360411110e+01 0 -1 0
855 1 16 6.2900000000000000e-01 1.4543072940742414e+02 2.6308846730511203e+02 8.7415981772005210e+01 0 -1 0
862 1 9 5.9999999999999998e-02 1.4295372843976162e+02 2.6519532801430188e+02 8.9957606415801152e+01 0 -1 0
861 1 11 -1.2000000000000000e-01 1.4394661364500004e+02 2.6518993129807671e+02 8.9507884461776143e+01 0 -1 0
885 1 3 -1.3239999999999999e-01 1.4656920438971761e+02 2.6121077398769944e+02 8.4626093327286270e+01 0 -1 0
883 1 1 -4.7300000000000002e-02 1.4842798416169219e+02 2.6244808701897688e+02 8.3254938205452390e+01 0 -1 0
851 1 16 6.2900000000000000e-01 1.4658598225418501e+02 2.6380375734602950e+02 8.9278535100500406e+01 0 -1 0
854 1 15 -2.2200000000000000e-01 1.4683751874892008e+02 2.6319135175416937e+02 8.7024018564757782e+01 0 -1 0
884 1 2 -5.7599999999999998e-02 1.4740268520478341e+02 2.6229303195051131e+02 8.4671561467202835e+01 0 -1 0
853 1 14 1.5300000000000000e-01 1.4764408899733775e+02 2.6296507370100699e+02 8.5913732590180189e+01 0 -1 0
848 1 13 -1.1910000000000000e-01 1.4935074717642706e+02 2.6320952967419845e+02 8.6383000653046054e+01 0 -1 0
850 1 15 -2.2200000000000000e-01 1.4756052353060127e+02 2.6364038105631943e+02 8.8171119812387914e+01 0 -1 0
849 1 14 1.5300000000000000e-01 1.4892227077747287e+02 2.6382293583033010e+02 8.7980832935533797e+01 0 -1 0
792 1 2 -5.7599999999999998e-02 1.5000003210779946e+02 2.6426211258402049e+02 8.8813587217075550e+01 0 -1 0
791 1 1 -4.7300000000000002e-02 1.5164922621884659e+02 2.6449758615050985e+02 8.8295222986773553e+01 0 -1 0
882 1 9 5.9999999999999998e-02 1.4688654510562208e+02 2.7030258771840670e+02 9.0612877540306258e+01 0 -1 0
6 1 6 -1.8620000000000000e-01 1.5827076450299114e+02 2.6302926797968291e+02 8.0942142837379777e+01 0 -1 0
10 1 5 1.1110000000000000e-01 1.5713854840652240e+02 2.6220011456551572e+02 8.2962083657016493e+01 0 -1 0
5 1 5 1.1110000000000000e-01 1.5778798086033717e+02 2.6329694059520699e+02 8.2220163481581835e+01 0 -1 0
1 1 1 -4.7300000000000002e-02 1.5828117161811895e+02 2.6492917392355690e+02 8.2707693581582120e+01 0 -1 0
3 1 3 -1.3239999999999999e-01 1.5895148931642018e+02 2.6415588603478909e+02 8.0324716853622903e+01 0 -1 0
1070 1 9 5.9999999999999998e-02 1.6533555236791199e+02 2.6207903320738080e+02 8.2753274070482064e+01 0 -1 0
2 1 2 -5.7599999999999998e-02 1.5907587675281312e+02 2.6531154226500814e+02 8.1119351962844092e+01 0 -1 0
1177 1 20 -0.0000000000000000e+00 1.5964173832298744e+02 2.6620871103388282e+02 8.0916155300579064e+01 0 -1 0
1069 1 11 -1.2000000000000000e-01 1.6547558254261531e+02 2.6164150495383967e+02 8.3741738213128741e+01 0 -1 0
1071 1 9 5.9999999999999998e-02 1.6522659442922122e+02 2.6230175972930812e+02 8.4572502051995315e+01 0 -1 0
1072 1 11 -1.2000000000000000e-01 1.6698215854045534e+02 2.6141735874953201e+02 8.3861786169824356e+01 0 -1 0
1073 1 9 5.9999999999999998e-02 1.6725696764255341e+02 2.6052097801290978e+02 8.3305835141508254e+01 0 -1 0
1074 1 9 5.9999999999999998e-02 1.6722554904248727e+02 2.6106719991966668e+02 8.4864906601849739e+01 0 -1 0
1077 1 9 5.9999999999999998e-02 1.6776810988394371e+02 2.6332228044413597e+02 8.4479839931946742e+01 0 -1 0
1076 1 9 5.9999999999999998e-02 1.6880137695446115e+02 2.6259574313028833e+02 8.3293325854280269e+01 0 -1 0
1075 1 12 -1.7999999999999999e-01 1.6775390800595076e+02 2.6275992391679983e+02 8.3546216094730269e+01 0 -1 0
1078 1 9 5.9999999999999998e-02 1.6723147048290389e+02 2.6330748319000094e+02 8.2761781303893457e+01 0 -1 0
867 1 11 -1.2000000000000000e-01 1.4362554379213523e+02 2.6748565440011203e+02 8.8242033334233696e+01 0 -1 0
869 1 9 5.9999999999999998e-02 1.4256995649619955e+02 2.6761007595873065e+02 8.8483600586531423e+01 0 -1 0
868 1 9 5.9999999999999998e-02 1.4386149176162257e+02 2.6785598950584165e+02 8.7244395875124255e+01 0 -1 0
872 1 9 5.9999999999999998e-02 1.4420342986668706e+02 2.6789457771154338e+02 9.0298249620108265e+01 0 -1 0
870 1 11 -1.2000000000000000e-01 1.4445293131678500e+02 2.6828257492458357e+02 8.9310673198200305e+01 0 -1 0
871 1 9 5.9999999999999998e-02 1.4550837506652013e+02 2.6810575167789307e+02 8.9103617558888715e+01 0 -1 0
875 1 9 5.9999999999999998e-02 1.4321553164478269e+02 2.7007456920483077e+02 8.9146357230291144e+01 0 -1 0
879 1 12 -1.7999999999999999e-01 1.4612899137270585e+02 2.7108586778730267e+02 9.0586711705532721e+01 0 -1 0
881 1 9 5.9999999999999998e-02 1.4636694718647283e+02 2.7163980942743905e+02 8.9678622501922661e+01 0 -1 0
878 1 9 5.9999999999999998e-02 1.4411833902691330e+02 2.7143428317782497e+02 9.0565493808065810e+01 0 -1 0
873 1 11 -1.2000000000000000e-01 1.4423874378777472e+02 2.6978798896024051e+02 8.9389274269491565e+01 0 -1 0
874 1 9 5.9999999999999998e-02 1.4483532779047206e+02 2.7016832067478185e+02 8.8560096776623354e+01 0 -1 0
876 1 11 -1.2000000000000000e-01 1.4469069958786156e+02 2.7050889402552627e+02 9.0629978712795563e+01 0 -1 0
880 1 9 5.9999999999999998e-02 1.4634587363043431e+02 2.7162292577524425e+02 9.1510091808231223e+01 0 -1 0
263 1 16 6.2900000000000000e-01 1.5915677673146735e+02 2.3576740473883584e+02 8.5486483832234015e+01 0 -1 0
271 1 9 5.9999999999999998e-02 1.5979781409711671e+02 2.3284678647508107e+02 8.7056139434684681e+01 0 -1 0
264 1 17 -3.9700000000000002e-01 1.5956406732339593e+02 2.3438412682027914e+02 8.5643766628941478e+01 0 -1 0
270 1 19 8.9999999999999997e-02 1.6005675332965160e+02 2.3389629660545467e+02 8.6916214558418005e+01 0 -1 0
272 1 9 5.9999999999999998e-02 1.5967727473646030e+02 2.3436539844305113e+02 8.7823980757465336e+01 0 -1 0
268 1 18 -4.8999999999999999e-01 1.5893518163860989e+02 2.3657972249794358e+02 8.6412818599850922e+01 0 -1 0
273 1 11 -1.2000000000000000e-01 1.6161067263682938e+02 2.3411141526601349e+02 8.6971842713943659e+01 0 -1 0
587 1 9 5.9999999999999998e-02 1.6335343310421555e+02 2.3689058114179758e+02 9.0517716521394163e+01 0 -1 0
284 1 9 5.9999999999999998e-02 1.6535146100299352e+02 2.3538441400647662e+02 8.6478485395902666e+01 0 -1 0
274 1 9 5.9999999999999998e-02 1.6188802081182166e+02 2.3336698204426054e+02 8.7718165180960000e+01 0 -1 0
275 1 9 5.9999999999999998e-02 1.6212878833663584e+02 2.3394215040623016e+02 8.6027911699769930e+01 0 -1 0
283 1 9 5.9999999999999998e-02 1.6393160690583838e+02 2.3499365483622043e+02 8.5479185530641516e+01 0 -1 0
282 1 11 -1.2000000000000000e-01 1.6434570765153808e+02 2.3569888260071343e+02 8.6199792490820357e+01 0 -1 0
276 1 11 -1.2000000000000000e-01 1.6209897751224645e+02 2.3553541193096348e+02 8.7383858537046251e+01 0 -1 0
279 1 11 -1.2000000000000000e-01 1.6355906025877897e+02 2.3567873054180870e+02 8.7541158505455854e+01 0 -1 0
281 1 9 5.9999999999999998e-02 1.6406755089804091e+02 2.3486549663653477e+02 8.8059027107520535e+01 0 -1 0
277 1 9 5.9999999999999998e-02 1.6169365232300333e+02 2.3570391805794230e+02 8.8381564495275512e+01 0 -1 0
278 1 9 5.9999999999999998e-02 1.6163827037494755e+02 2.3637608266558127e+02 8.6865089164255522e+01 0 -1 0
225 1 11 -1.2000000000000000e-01 1.5710566522607419e+02 2.4027245800358065e+02 9.0284884284684551e+01 0 -1 0
227 1 9 5.9999999999999998e-02 1.5799391923149912e+02 2.4022290094652175e+02 9.0914684985415420e+01 0 -1 0
232 1 9 5.9999999999999998e-02 1.5620266191159257e+02 2.3728652778889841e+02 9.1276201702032466e+01 0 -1 0
224 1 9 5.9999999999999998e-02 1.5744620743863842e+02 2.3841577231923495e+02 8.9119143529719082e+01 0 -1 0
223 1 9 5.9999999999999998e-02 1.5643477810155699e+02 2.3959894554102297e+02 8.8479392703729616e+01 0 -1 0
222 1 11 -1.2000000000000000e-01 1.5738034079904989e+02 2.3949851574662418e+02 8.9012238878091210e+01 0 -1 0
220 1 9 5.9999999999999998e-02 1.5933653774097218e+02 2.3826840795289866e+02 9.0651730623237185e+01 0 -1 0
218 1 12 -1.7999999999999999e-01 1.6000056988715886e+02 2.3835508509556078e+02 8.9791702495715853e+01 0 -1 0
235 1 8 4.4400000000000002e-02 1.6126699546382423e+02 2.4240063475864054e+02 8.6166230643863940e+01 0 -1 0
200 1 4 1.7790000000000000e-01 1.5941896769652851e+02 2.4175646466449123e+02 8.6036630444397204e+01 0 -1 0
210 1 8 4.4400000000000002e-02 1.5849345045124451e+02 2.4148531584959636e+02 8.7712940326866303e+01 0 -1 0
211 1 9 5.9999999999999998e-02 1.5888075387965142e+02 2.4220153551201062e+02 8.8437595727557877e+01 0 -1 0
214 1 9 5.9999999999999998e-02 1.5856607626947485e+02 2.3932138625439032e+02 8.7471965924566121e+01 0 -1 0
213 1 10 -5.9999999999999998e-02 1.5861515027878966e+02 2.4005840498261779e+02 8.8273523867482126e+01 0 -1 0
215 1 11 -1.2000000000000000e-01 1.5990926094458780e+02 2.3975300850344965e+02 8.9007887107453755e+01 0 -1 0
584 1 9 5.9999999999999998e-02 1.6311618134176928e+02 2.3933434380529334e+02 8.9691237895133327e+01 0 -1 0
236 1 9 5.9999999999999998e-02 1.6155635927717310e+02 2.4206238171467814e+02 8.7161194140505231e+01 0 -1 0
212 1 9 5.9999999999999998e-02 1.5744334358877796e+02 2.4172585093245445e+02 8.7547053353527374e+01 0 -1 0
585 1 12 -1.7999999999999999e-01 1.6337303026441529e+02 2.3774856652053785e+02 9.1189711346373258e+01 0 -1 0
577 1 9 5.9999999999999998e-02 1.6351543346068053e+02 2.4188030675995253e+02 9.0017535411669030e+01 0 -1 0
576 1 11 -1.2000000000000000e-01 1.6431165292099317e+02 2.4168008013105597e+02 9.0734503938323300e+01 0 -1 0
578 1 9 5.9999999999999998e-02 1.6413198375573285e+02 2.4249922849712928e+02 9.1430790481410028e+01 0 -1 0
579 1 11 -1.2000000000000000e-01 1.6401382278725720e+02 2.4029457462908695e+02 9.1473659985384614e+01 0 -1 0
582 1 11 -1.2000000000000000e-01 1.6382518583740563e+02 2.3908300966303605e+02 9.0480062358347297e+01 0 -1 0
217 1 9 5.9999999999999998e-02 1.6082185864513920e+02 2.3981383166198768e+02 8.8414957004971839e+01 0 -1 0
588 1 9 5.9999999999999998e-02 1.6240786700678021e+02 2.3768593379397109e+02 9.1692341455658976e+01 0 -1 0
221 1 9 5.9999999999999998e-02 1.6092561869871136e+02 2.3827278528705483e+02 9.0362325946253179e+01 0 -1 0
219 1 9 5.9999999999999998e-02 1.5970492361904942e+02 2.3751086184951791e+02 8.9168821714509662e+01 0 -1 0
216 1 9 5.9999999999999998e-02 1.5994401454429655e+02 2.4047093212389854e+02 8.9827324636182240e+01 0 -1 0
581 1 9 5.9999999999999998e-02 1.6306843558183229e+02 2.4037915648137113e+02 9.2009560148255019e+01 0 -1 0
280 1 9 5.9999999999999998e-02 1.6384069772208287e+02 2.3654881225617129e+02 8.8134233669002356e+01 0 -1 0
287 1 9 5.9999999999999998e-02 1.6496223587211321e+02 2.3761140781206549e+02 8.6265058972214348e+01 0 -1 0
246 1 9 5.9999999999999998e-02 1.6329719953535530e+02 2.4113911491311430e+02 8.7843202735329967e+01 0 -1 0
574 1 9 5.9999999999999998e-02 1.6590426069010991e+02 2.4082602467141086e+02 8.9417460120564783e+01 0 -1 0
568 1 9 5.9999999999999998e-02 1.6792689186659729e+02 2.4196514734810609e+02 8.8535921879245322e+01 0 -1 0
575 1 9 5.9999999999999998e-02 1.6648511782497962e+02 2.4140854354599730e+02 9.0905406678503681e+01 0 -1 0
573 1 11 -1.2000000000000000e-01 1.6575152278123397e+02 2.4163510936023664e+02 9.0131710154798014e+01 0 -1 0
583 1 9 5.9999999999999998e-02 1.6479605517412671e+02 2.3880840654677240e+02 9.0067623220833241e+01 0 -1 0
571 1 9 5.9999999999999998e-02 1.6546919677719163e+02 2.4310475144831986e+02 8.8593509376073527e+01 0 -1 0
570 1 11 -1.2000000000000000e-01 1.6614093025706546e+02 2.4299242521242675e+02 8.9444542340071564e+01 0 -1 0
567 1 11 -1.2000000000000000e-01 1.6766022902118416e+02 2.4290069028433339e+02 8.9027604146736422e+01 0 -1 0
569 1 9 5.9999999999999998e-02 1.6837654662281520e+02 2.4308468926492355e+02 8.9828312305118999e+01 0 -1 0
580 1 9 5.9999999999999998e-02 1.6486323077996056e+02 2.4021207350255310e+02 9.2151746188585619e+01 0 -1 0
749 1 9 5.9999999999999998e-02 1.6626859517802751e+02 2.5384020358289240e+02 9.2175490553396671e+01 0 -1 0
230 1 9 5.9999999999999998e-02 1.5516132250065985e+02 2.3949414260522369e+02 9.0536766140133551e+01 0 -1 0
228 1 11 -1.2000000000000000e-01 1.5605959287662290e+02 2.3951945671951415e+02 9.1153669316586075e+01 0 -1 0
229 1 9 5.9999999999999998e-02 1.5571845516560830e+02 2.4015421166886813e+02 9.1971478105520831e+01 0 -1 0
231 1 12 -1.7999999999999999e-01 1.5642493268533221e+02 2.3820914310294239e+02 9.1812370216394356e+01 0 -1 0
111 1 7 1.4210000000000000e-01 1.5585901430988474e+02 2.4909594562198544e+02 8.6777033254241246e+01 0 -1 0
155 1 11 -1.2000000000000000e-01 1.5759773796504561e+02 2.4756562474640143e+02 9.0081607377399251e+01 0 -1 0
156 1 9 5.9999999999999998e-02 1.5757764314841899e+02 2.4728334162801249e+02 8.9028985618887972e+01 0 -1 0
160 1 9 5.9999999999999998e-02 1.5709882122028733e+02 2.4542801455192745e+02 9.0727177579702868e+01 0 -1 0
153 1 9 5.9999999999999998e-02 1.5583821761940382e+02 2.4891987248400443e+02 8.9942239499780996e+01 0 -1 0
233 1 9 5.9999999999999998e-02 1.5568711060454899e+02 2.3793954063525808e+02 9.2568037528590054e+01 0 -1 0
158 1 12 -1.7999999999999999e-01 1.5675595089608606e+02 2.4645729996022763e+02 9.0832588653850024e+01 0 -1 0
234 1 9 5.9999999999999998e-02 1.5741001208864517e+02 2.3810423274853753e+02 9.2267026567366798e+01 0 -1 0
144 1 9 5.9999999999999998e-02 1.5872837734987868e+02 2.5126227268650135e+02 9.1553970492736951e+01 0 -1 0
226 1 9 5.9999999999999998e-02 1.5668558101502157e+02 2.4124962274061562e+02 9.0046601065140294e+01 0 -1 0
1094 1 9 5.9999999999999998e-02 1.6308529805962615e+02 2.4856250168681004e+02 8.6501342014257332e+01 0 -1 0
1106 1 9 5.9999999999999998e-02 1.6172366074802241e+02 2.4781315303886939e+02 8.8558017075113796e+01 0 -1 0
1111 1 9 5.9999999999999998e-02 1.6203673248613086e+02 2.4541899823890660e+02 8.8141922668368949e+01 0 -1 0
1104 1 11 -1.2000000000000000e-01 1.6268098121977721e+02 2.4801624144577309e+02 8.9038009605003467e+01 0 -1 0
1116 1 9 5.9999999999999998e-02 1.6153646664028113e+02 2.4592015158765477e+02 9.0485888826997964e+01 0 -1 0
1113 1 12 -1.7999999999999999e-01 1.6226922552952632e+02 2.4515458730866226e+02 9.0230789344602641e+01 0 -1 0
1115 1 9 5.9999999999999998e-02 1.6178785230537761e+02 2.4417666816655966e+02 9.0223442912451233e+01 0 -1 0
1114 1 9 5.9999999999999998e-02 1.6307136957298823e+02 2.4514735667202700e+02 9.0968768105177546e+01 0 -1 0
1105 1 9 5.9999999999999998e-02 1.6251903492490740e+02 2.4794764585723831e+02 9.0113727059017222e+01 0 -1 0
1110 1 11 -1.2000000000000000e-01 1.6284725389858892e+02 2.4540551044230725e+02 8.8870601696356402e+01 0 -1 0
1107 1 11 -1.2000000000000000e-01 1.6361125906278917e+02 2.4677842886612254e+02 8.8787093515269788e+01 0 -1 0
1112 1 9 5.9999999999999998e-02 1.6356145056260902e+02 2.4463315964244379e+02 8.8585124032725744e+01 0 -1 0
1109 1 9 5.9999999999999998e-02 1.6386310701549488e+02 2.4677667018454440e+02 8.7726589159004803e+01 0 -1 0
1108 1 9 5.9999999999999998e-02 1.6458952860980912e+02 2.4679925666464149e+02 8.9267359216236798e+01 0 -1 0
1092 1 8 4.4400000000000002e-02 1.6302030154333434e+02 2.4949669168218034e+02 8.7059163237587754e+01 0 -1 0
1095 1 10 -5.9999999999999998e-02 1.6330957880425075e+02 2.4934211473533134e+02 8.8594573087330375e+01 0 -1 0
157 1 9 5.9999999999999998e-02 1.5858236362751595e+02 2.4776588443105615e+02 9.0504110072363886e+01 0 -1 0
1096 1 9 5.9999999999999998e-02 1.6438627572311350e+02 2.4928798460798214e+02 8.8755488202296718e+01 0 -1 0
563 1 18 -4.8999999999999999e-01 1.6574020232197853e+02 2.4531176341220927e+02 8.6702535799729390e+01 0 -1 0
572 1 9 5.9999999999999998e-02 1.6594056431953189e+02 2.4382990888888838e+02 9.0112804795864932e+01 0 -1 0
565 1 9 5.9999999999999998e-02 1.6778705532813572e+02 2.4503277466221243e+02 8.8355415119442824e+01 0 -1 0
564 1 19 8.9999999999999997e-02 1.6803205273895568e+02 2.4401826132605399e+02 8.8041028460794152e+01 0 -1 0
566 1 9 5.9999999999999998e-02 1.6911741061761020e+02 2.4411775615409834e+02 8.8026906884083999e+01 0 -1 0
121 1 9 5.9999999999999998e-02 1.5016367198356912e+02 2.5184920729647891e+02 8.8820868990857107e+01 0 -1 0
123 1 9 5.9999999999999998e-02 1.5087742768906580e+02 2.5039944188340516e+02 8.9504841072236033e+01 0 -1 0
122 1 9 5.9999999999999998e-02 1.4961021830648443e+02 2.5128706459019810e+02 9.0344400174515101e+01 0 -1 0
120 1 12 -1.7999999999999999e-01 1.5051616012246274e+02 2.5139851895757894e+02 8.9748625578241700e+01 0 -1 0
118 1 9 5.9999999999999998e-02 1.5108287861821395e+02 2.5308141722422258e+02 9.1125460086886491e+01 0 -1 0
117 1 11 -1.2000000000000000e-01 1.5156816443317589e+02 2.5221026492809654e+02 9.0685356060289223e+01 0 -1 0
119 1 9 5.9999999999999998e-02 1.5185704313107721e+02 2.5158621572230788e+02 9.1531058059512816e+01 0 -1 0
128 1 9 5.9999999999999998e-02 1.5281058069750549e+02 2.5491398064843077e+02 9.2058984475812210e+01 0 -1 0
154 1 9 5.9999999999999998e-02 1.5675780349971888e+02 2.4913646169520374e+02 9.1385807495633671e+01 0 -1 0
748 1 9 5.9999999999999998e-02 1.6479298799801828e+02 2.5289686141550482e+02 9.1827071413062896e+01 0 -1 0
116 1 9 5.9999999999999998e-02 1.5227541273726064e+02 2.5335777238308251e+02 8.9183088561228146e+01 0 -1 0
115 1 10 -5.9999999999999998e-02 1.5279377150242902e+02 2.5270968989818326e+02 8.9889766198726264e+01 0 -1 0
687 1 1 -4.7300000000000002e-02 1.5789851559046704e+02 2.5560284268059485e+02 8.6828718291167377e+01 0 -1 0
107 1 3 -1.3239999999999999e-01 1.5541167696645718e+02 2.4988180719195205e+02 8.6186515774377355e+01 0 -1 0
101 1 3 -1.3239999999999999e-01 1.5410251194883381e+02 2.5514928830472707e+02 8.7351244328844643e+01 0 -1 0
104 1 6 -1.8620000000000000e-01 1.5435193191737608e+02 2.5373750818398426e+02 8.7144493472415775e+01 0 -1 0
109 1 6 -1.8620000000000000e-01 1.5504307278673545e+02 2.5121526225039284e+02 8.6648413951240187e+01 0 -1 0
150 1 9 5.9999999999999998e-02 1.5730741149525892e+02 2.5005082068427248e+02 8.8442396953183760e+01 0 -1 0
113 1 9 5.9999999999999998e-02 1.5293065274163709e+02 2.5107163597094487e+02 8.8483976175641345e+01 0 -1 0
102 1 4 1.7790000000000000e-01 1.5497612416598520e+02 2.5221806977950470e+02 8.8162823106476296e+01 0 -1 0
138 1 9 5.9999999999999998e-02 1.5675308208420080e+02 2.5347401088516386e+02 8.9452224807480505e+01 0 -1 0
112 1 8 4.4400000000000002e-02 1.5356564165360987e+02 2.5150764079129434e+02 8.9255201751905730e+01 0 -1 0
137 1 8 4.4400000000000002e-02 1.5680879426735868e+02 2.5250034771325727e+02 8.8965422719887556e+01 0 -1 0
127 1 11 -1.2000000000000000e-01 1.5351219505924993e+02 2.5485173632523225e+02 9.1227141447568101e+01 0 -1 0
124 1 11 -1.2000000000000000e-01 1.5376332605532517e+02 2.5336984978630801e+02 9.0893402258648777e+01 0 -1 0
126 1 9 5.9999999999999998e-02 1.5481138241884494e+02 2.5347303025616992e+02 9.0612276713937689e+01 0 -1 0
114 1 9 5.9999999999999998e-02 1.5413257338157734e+02 2.5069455093409721e+02 8.9708604147973347e+01 0 -1 0
141 1 9 5.9999999999999998e-02 1.5634793902485907e+02 2.5128460319496824e+02 9.0802100304979660e+01 0 -1 0
140 1 10 -5.9999999999999998e-02 1.5716791588638640e+02 2.5145816468706502e+02 9.0105239949513134e+01 0 -1 0
139 1 9 5.9999999999999998e-02 1.5760895698584773e+02 2.5253466605496413e+02 8.8226056859006562e+01 0 -1 0
146 1 9 5.9999999999999998e-02 1.5772138857770793e+02 2.5415805327471924e+02 9.1663385912313117e+01 0 -1 0
149 1 11 -1.2000000000000000e-01 1.5751040822249414e+02 2.5008929933942991e+02 8.9512636205358689e+01 0 -1 0
142 1 11 -1.2000000000000000e-01 1.5829325596486075e+02 2.5208664961860762e+02 9.0989017353812116e+01 0 -1 0
125 1 9 5.9999999999999998e-02 1.5385635129128877e+02 2.5276681257027266e+02 9.1796614537730036e+01 0 -1 0
152 1 11 -1.2000000000000000e-01 1.5686030818807529e+02 2.4892784929053406e+02 9.0320878348872469e+01 0 -1 0
145 1 12 -1.7999999999999999e-01 1.5792730606010181e+02 2.5314966101104523e+02 9.2022333123185120e+01 0 -1 0
129 1 9 5.9999999999999998e-02 1.5290290486865149e+02 2.5527004224808522e+02 9.0425963802761586e+01 0 -1 0
1082 1 4 1.7790000000000000e-01 1.6425272000900765e+02 2.5066414140583308e+02 8.6254989943270274e+01 0 -1 0
151 1 9 5.9999999999999998e-02 1.5858472616376233e+02 2.4990585066095386e+02 8.9529593369154199e+01 0 -1 0
688 1 2 -5.7599999999999998e-02 1.5886664931052360e+02 2.5411623789996904e+02 8.6627339148664518e+01 0 -1 0
698 1 7 1.4210000000000000e-01 1.6063686017882415e+02 2.5333788497673422e+02 8.7459091212478057e+01 0 -1 0
689 1 3 -1.3239999999999999e-01 1.5991386252575271e+02 2.5413466650000859e+02 8.7552971976331747e+01 0 -1 0
1098 1 9 5.9999999999999998e-02 1.6164719092081131e+02 2.5059185553686993e+02 8.9530269737884296e+01 0 -1 0
1099 1 9 5.9999999999999998e-02 1.6292716924791569e+02 2.5150868410479887e+02 8.8850565656309769e+01 0 -1 0
1097 1 11 -1.2000000000000000e-01 1.6272425183778503e+02 2.5056904497326687e+02 8.9364377714425842e+01 0 -1 0
1101 1 9 5.9999999999999998e-02 1.6282150418267179e+02 2.4994388017725950e+02 9.1428027065677114e+01 0 -1 0
143 1 9 5.9999999999999998e-02 1.5916220855897859e+02 2.5243447763318258e+02 9.0430414577748266e+01 0 -1 0
1102 1 9 5.9999999999999998e-02 1.6287238934668736e+02 2.5162441426429373e+02 9.1293632257479317e+01 0 -1 0
1100 1 12 -1.7999999999999999e-01 1.6324755654697839e+02 2.5072726419662416e+02 9.0801218476393373e+01 0 -1 0
726 1 9 5.9999999999999998e-02 1.6170923907169049e+02 2.5408237786586267e+02 9.0834296159990316e+01 0 -1 0
692 1 6 -1.8620000000000000e-01 1.5990046348009258e+02 2.5524787491423379e+02 8.8426774561326610e+01 0 -1 0
727 1 9 5.9999999999999998e-02 1.6020030681647577e+02 2.5453286659461435e+02 9.1538527068563269e+01 0 -1 0
1103 1 9 5.9999999999999998e-02 1.6433640903985898e+02 2.5074850911645427e+02 9.0846483575172144e+01 0 -1 0
725 1 8 4.4400000000000002e-02 1.6116900388015662e+02 2.5493612779488026e+02 9.1243389063640677e+01 0 -1 0
728 1 10 -5.9999999999999998e-02 1.6193120785512025e+02 2.5547818083769630e+02 9.2544819764918458e+01 0 -1 0
737 1 11 -1.2000000000000000e-01 1.6343574344993559e+02 2.5574428568467962e+02 9.2287649088767537e+01 0 -1 0
738 1 9 5.9999999999999998e-02 1.6369314402139889e+02 2.5522982923485239e+02 9.1361809197156433e+01 0 -1 0
134 1 9 5.9999999999999998e-02 1.5419759993129648e+02 2.5725139438012991e+02 9.3126009276747141e+01 0 -1 0
161 1 9 5.9999999999999998e-02 1.5667322456057207e+02 2.4667306579151924e+02 9.1897812320302805e+01 0 -1 0
815 1 9 5.9999999999999998e-02 1.5203332814651071e+02 2.6895663104192192e+02 9.1318596964237571e+01 0 -1 0
1121 1 9 5.9999999999999998e-02 1.6712571595997642e+02 2.5127840744510661e+02 8.6645131655259149e+01 0 -1 0
1129 1 11 -1.2000000000000000e-01 1.6672348007245731e+02 2.5300741111906277e+02 8.5550356221154374e+01 0 -1 0
1130 1 9 5.9999999999999998e-02 1.6768186015473572e+02 2.5343671736591472e+02 8.5258288139282911e+01 0 -1 0
1120 1 10 -5.9999999999999998e-02 1.6671717787120133e+02 2.5226344316508096e+02 8.6870744731995927e+01 0 -1 0
1132 1 11 -1.2000000000000000e-01 1.6587112278029852e+02 2.5426957995065021e+02 8.5424811232233935e+01 0 -1 0
1134 1 9 5.9999999999999998e-02 1.6484199612735492e+02 2.5413719089206353e+02 8.5758684802236289e+01 0 -1 0
1128 1 9 5.9999999999999998e-02 1.6912634245004540e+02 2.5395856900627308e+02 8.6811325544919029e+01 0 -1 0
1135 1 11 -1.2000000000000000e-01 1.6601380524468996e+02 2.5493780814966379e+02 8.4003215287700172e+01 0 -1 0
1133 1 9 5.9999999999999998e-02 1.6634383128998186e+02 2.5498985923986669e+02 8.6092527047533878e+01 0 -1 0
1136 1 9 5.9999999999999998e-02 1.6699505192565636e+02 2.5491685008890317e+02 8.3529067910889168e+01 0 -1 0
1127 1 9 5.9999999999999998e-02 1.6965591790111910e+02 2.5235587111129473e+02 8.7344822972519083e+01 0 -1 0
1117 1 8 4.4400000000000002e-02 1.6528729115164847e+02 2.5180279533015332e+02 8.7346148479164896e+01 0 -1 0
1119 1 9 5.9999999999999998e-02 1.6467107182872991e+02 2.5257200504291487e+02 8.7811648385846979e+01 0 -1 0
1122 1 11 -1.2000000000000000e-01 1.6755810925569133e+02 2.5283311669259479e+02 8.7995928073791362e+01 0 -1 0
1125 1 12 -1.7999999999999999e-01 1.6901098117997540e+02 2.5320077362601648e+02 8.7586269374636188e+01 0 -1 0
1126 1 9 5.9999999999999998e-02 1.6952441406857938e+02 2.5365198907283593e+02 8.8435322534163788e+01 0 -1 0
1124 1 9 5.9999999999999998e-02 1.6705720447740850e+02 2.5370446416281746e+02 8.8417766971948041e+01 0 -1 0
1118 1 9 5.9999999999999998e-02 1.6548308444918806e+02 2.5109556942525165e+02 8.8152123977466786e+01 0 -1 0
1123 1 9 5.9999999999999998e-02 1.6762456156549450e+02 2.5207978186508268e+02 8.8780893514642258e+01 0 -1 0
816 1 11 -1.2000000000000000e-01 1.5172316526792497e+02 2.7100245932194343e+02 9.1790262491710251e+01 0 -1 0
811 1 9 5.9999999999999998e-02 1.4960341196070644e+02 2.6934219676742134e+02 9.3040927967005899e+01 0 -1 0
818 1 9 5.9999999999999998e-02 1.5242198138433702e+02 2.7102112388671287e+02 9.2626568576839205e+01 0 -1 0
159 1 9 5.9999999999999998e-02 1.5572339003152916e+02 2.4648016506653175e+02 9.0484170439818925e+01 0 -1 0
746 1 12 -1.7999999999999999e-01 1.6545095889080275e+02 2.5326743481928682e+02 9.2613105533832652e+01 0 -1 0
94 1 9 5.9999999999999998e-02 1.4604837570872476e+02 2.5929153096015961e+02 9.1891870131436306e+01 0 -1 0
944 1 9 5.9999999999999998e-02 1.4945140283722321e+02 2.5544916998152530e+02 8.8938036565821506e+01 0 -1 0
586 1 9 5.9999999999999998e-02 1.6409013682114087e+02 2.3752938880275036e+02 9.1980798768952994e+01 0 -1 0
88 1 9 5.9999999999999998e-02 1.4800582054677480e+02 2.5875558501795854e+02 8.9306905975657273e+01 0 -1 0
86 1 11 -1.2000000000000000e-01 1.4820020071076743e+02 2.5950894133767338e+02 9.0070300108991731e+01 0 -1 0
83 1 11 -1.2000000000000000e-01 1.4938064489743252e+02 2.6036333100457392e+02 8.9532621950053127e+01 0 -1 0
82 1 9 5.9999999999999998e-02 1.5093916589456089e+02 2.5891154907920748e+02 8.9191615102117183e+01 0 -1 0
80 1 11 -1.2000000000000000e-01 1.5078081454560848e+02 2.5981365102639984e+02 8.9782577814324952e+01 0 -1 0
77 1 11 -1.2000000000000000e-01 1.5185176881140683e+02 2.6088336845029869e+02 8.9410207311938095e+01 0 -1 0
87 1 9 5.9999999999999998e-02 1.4844639061435478e+02 2.5904002002322710e+02 9.1022982308318973e+01 0 -1 0
81 1 9 5.9999999999999998e-02 1.5096610851200339e+02 2.5960295306121606e+02 9.0835845361405703e+01 0 -1 0
830 1 9 5.9999999999999998e-02 1.4940809067416350e+02 2.6166297828703927e+02 9.2656343404663303e+01 0 -1 0
76 1 9 5.9999999999999998e-02 1.5362504962338338e+02 2.6006469160981442e+02 9.0612590389636466e+01 0 -1 0
74 1 19 8.9999999999999997e-02 1.5335492804487703e+02 2.6055289402450711e+02 8.9676217824309887e+01 0 -1 0
73 1 18 -4.8999999999999999e-01 1.5326917932056242e+02 2.5771642183436973e+02 8.9070094876874876e+01 0 -1 0
79 1 9 5.9999999999999998e-02 1.5182379050218367e+02 2.6133149327001610e+02 8.8416979534319182e+01 0 -1 0
147 1 9 5.9999999999999998e-02 1.5713088309175237e+02 2.5276578210392356e+02 9.2659865427959431e+01 0 -1 0
67 1 16 6.2900000000000000e-01 1.5443317093908217e+02 2.6050835100135140e+02 8.7368735415703384e+01 0 -1 0
110 1 7 1.4210000000000000e-01 1.5427757248671423e+02 2.5579678853551067e+02 8.8197705940030971e+01 0 -1 0
71 1 16 6.2900000000000000e-01 1.5371382914725311e+02 2.5849448041489075e+02 8.8238135524070501e+01 0 -1 0
68 1 17 -3.9700000000000002e-01 1.5382241801623309e+02 2.5986716011942718e+02 8.8466271129080340e+01 0 -1 0
75 1 9 5.9999999999999998e-02 1.5385636988222137e+02 2.6151863770709940e+02 8.9739425560357631e+01 0 -1 0
130 1 11 -1.2000000000000000e-01 1.5471496599824422e+02 2.5570924555027557e+02 9.1640807739073722e+01 0 -1 0
693 1 1 -4.7300000000000002e-02 1.5722824230425093e+02 2.5829607108257727e+02 8.9404986987352032e+01 0 -1 0
750 1 13 -1.1910000000000000e-01 1.5676983672602663e+02 2.6147064034151623e+02 9.0367625880305155e+01 0 -1 0
694 1 2 -5.7599999999999998e-02 1.5815155964822154e+02 2.5914743329886568e+02 9.0690428147115412e+01 0 -1 0
751 1 14 1.5300000000000000e-01 1.5766866507307626e+02 2.6038772890707520e+02 9.1318455850112500e+01 0 -1 0
752 1 15 -2.2200000000000000e-01 1.5799239244869256e+02 2.6096886587260093e+02 9.2504964472444101e+01 0 -1 0
696 1 5 1.1110000000000000e-01 1.5852778818617227e+02 2.5712154037827167e+02 8.9239680198784725e+01 0 -1 0
691 1 5 1.1110000000000000e-01 1.5876534098688788e+02 2.5604659157887869e+02 8.8294273063259610e+01 0 -1 0
132 1 9 5.9999999999999998e-02 1.5535444067852129e+02 2.5572397485064869e+02 9.0758223329689216e+01 0 -1 0
135 1 9 5.9999999999999998e-02 1.5357720467492720e+02 2.5764035490485583e+02 9.1566900437784753e+01 0 -1 0
808 1 9 5.9999999999999998e-02 1.4780190534009580e+02 2.6695312943169205e+02 9.3209913958846244e+01 0 -1 0
723 1 9 5.9999999999999998e-02 1.6100871328521777e+02 2.6334350567177023e+02 8.9891146471375279e+01 0 -1 0
711 1 9 5.9999999999999998e-02 1.6438611055700144e+02 2.5893175371525149e+02 8.7228872256090241e+01 0 -1 0
822 1 9 5.9999999999999998e-02 1.5303290216308815e+02 2.7100996544572700e+02 8.9878639537075600e+01 0 -1 0
877 1 9 5.9999999999999998e-02 1.4444733214883675e+02 2.6998958023326668e+02 9.1556901312513133e+01 0 -1 0
739 1 9 5.9999999999999998e-02 1.6364477801974533e+02 2.5675576197377808e+02 9.1939338478000636e+01 0 -1 0
720 1 9 5.9999999999999998e-02 1.5945696067260579e+02 2.6100668249731876e+02 8.8566124009621944e+01 0 -1 0
695 1 3 -1.3239999999999999e-01 1.5928132698757531e+02 2.5840649480494369e+02 9.1035555831127056e+01 0 -1 0
713 1 9 5.9999999999999998e-02 1.6229612031900731e+02 2.5984938051173373e+02 8.7722136249026306e+01 0 -1 0
709 1 9 5.9999999999999998e-02 1.6494216236856684e+02 2.5745379117674332e+02 8.7999870493935177e+01 0 -1 0
702 1 9 5.9999999999999998e-02 1.6256751043281062e+02 2.5704568798474241e+02 8.7898177657210823e+01 0 -1 0
708 1 12 -1.7999999999999999e-01 1.6491648281477401e+02 2.5853919953909281e+02 8.8096458413266049e+01 0 -1 0
714 1 9 5.9999999999999998e-02 1.6096157707054360e+02 2.5899659942440701e+02 8.8299594171819905e+01 0 -1 0
712 1 11 -1.2000000000000000e-01 1.6189390069660843e+02 2.5944026412631638e+02 8.8648928112735291e+01 0 -1 0
700 1 8 4.4400000000000002e-02 1.6251189312133616e+02 2.5698368560797519e+02 8.8984990623299296e+01 0 -1 0
703 1 10 -5.9999999999999998e-02 1.6276256212214366e+02 2.5839134462022855e+02 8.9418184782722520e+01 0 -1 0
705 1 11 -1.2000000000000000e-01 1.6423820372268344e+02 2.5887928374077984e+02 8.9366221232925582e+01 0 -1 0
707 1 9 5.9999999999999998e-02 1.6432557616192926e+02 2.5995699757893624e+02 8.9504058221485053e+01 0 -1 0
701 1 9 5.9999999999999998e-02 1.6336856565903256e+02 2.5637887470359902e+02 8.9282338781640036e+01 0 -1 0
717 1 9 5.9999999999999998e-02 1.6132301661318962e+02 2.6045704984903114e+02 9.0450640036738832e+01 0 -1 0
690 1 4 1.7790000000000000e-01 1.6091819013008086e+02 2.5607721325269591e+02 8.9696333730517750e+01 0 -1 0
697 1 6 -1.8620000000000000e-01 1.5958407162027004e+02 2.5731949062031185e+02 9.0149363905275834e+01 0 -1 0
704 1 9 5.9999999999999998e-02 1.6250891748964864e+02 2.5842736384555451e+02 9.0477650221428959e+01 0 -1 0
699 1 7 1.4210000000000000e-01 1.6006016909618745e+02 2.5880622782647134e+02 9.1668025973784353e+01 0 -1 0
706 1 9 5.9999999999999998e-02 1.6486577731835354e+02 2.5833117024748924e+02 9.0068946711380804e+01 0 -1 0
715 1 11 -1.2000000000000000e-01 1.6153609332515703e+02 2.6070738253892688e+02 8.9411394224009499e+01 0 -1 0
716 1 9 5.9999999999999998e-02 1.6238124111566256e+02 2.6139463129088233e+02 8.9450309136981005e+01 0 -1 0
820 1 9 5.9999999999999998e-02 1.5275255016793108e+02 2.7258002662617486e+02 9.0556843417742897e+01 0 -1 0
1139 1 9 5.9999999999999998e-02 1.6507636771606343e+02 2.5665310188447825e+02 8.2863827219310153e+01 0 -1 0
1140 1 9 5.9999999999999998e-02 1.6462377872424824e+02 2.5673269470531181e+02 8.4447722155762122e+01 0 -1 0
1141 1 9 5.9999999999999998e-02 1.6619934013977846e+02 2.5720041568387904e+02 8.4014491187718718e+01 0 -1 0
1138 1 12 -1.7999999999999999e-01 1.6547304277295552e+02 2.5640482809588781e+02 8.3848260662008840e+01 0 -1 0
747 1 9 5.9999999999999998e-02 1.6605594135658731e+02 2.5243869621307110e+02 9.2980921474608607e+01 0 -1 0
710 1 9 5.9999999999999998e-02 1.6596115458330121e+02 2.5883090986740268e+02 8.7988449269017011e+01 0 -1 0
814 1 9 5.9999999999999998e-02 1.5050278306318640e+02 2.6949966933140729e+02 9.0750909622484258e+01 0 -1 0
863 1 9 5.9999999999999998e-02 1.4451460618964609e+02 2.6567345590445893e+02 9.0302672761686722e+01 0 -1 0
859 1 9 5.9999999999999998e-02 1.4427209986111183e+02 2.6330417016910434e+02 9.0409840990596877e+01 0 -1 0
84 1 9 5.9999999999999998e-02 1.4939387129595659e+02 2.6134812993038958e+02 8.9999629606900356e+01 0 -1 0
856 1 18 -4.8999999999999999e-01 1.4671803772334033e+02 2.6417946704241314e+02 9.0424638577166746e+01 0 -1 0
827 1 9 5.9999999999999998e-02 1.5177577168309682e+02 2.6220292796752182e+02 9.2609699683255570e+01 0 -1 0
817 1 9 5.9999999999999998e-02 1.5096178506956323e+02 2.7175872560637242e+02 9.1981211473867106e+01 0 -1 0
793 1 3 -1.3239999999999999e-01 1.4986576401989109e+02 2.6456257716915184e+02 9.0184904087424357e+01 0 -1 0
794 1 5 1.1110000000000000e-01 1.5216194921210129e+02 2.6461521181803300e+02 9.0012864703779854e+01 0 -1 0
78 1 9 5.9999999999999998e-02 1.5172505758921858e+02 2.6166555696677159e+02 9.0158689477809546e+01 0 -1 0
797 1 7 1.4210000000000000e-01 1.4893130408337225e+02 2.6451807205602444e+02 9.0724537223866875e+01 0 -1 0
795 1 6 -1.8620000000000000e-01 1.5108777816800412e+02 2.6473829199803617e+02 9.0902764298623197e+01 0 -1 0
730 1 11 -1.2000000000000000e-01 1.6125233261122082e+02 2.5671371220397981e+02 9.3259103816813592e+01 0 -1 0
131 1 9 5.9999999999999998e-02 1.5526095240820692e+02 2.5514232682690240e+02 9.2394864776327950e+01 0 -1 0
819 1 12 -1.7999999999999999e-01 1.5230692646590967e+02 2.7159136370086242e+02 9.0447001529628778e+01 0 -1 0
788 1 4 1.7790000000000000e-01 1.5180657845231113e+02 2.6496978268926324e+02 9.2620114625522319e+01 0 -1 0
731 1 9 5.9999999999999998e-02 1.6126393037798039e+02 2.5747692562924419e+02 9.2480983728409569e+01 0 -1 0
798 1 8 4.4400000000000002e-02 1.5189380550960010e+02 2.6677204495778403e+02 9.3093385347209264e+01 0 -1 0
800 1 9 5.9999999999999998e-02 1.5262957772848890e+02 2.6726880664763797e+02 9.2460955859591607e+01 0 -1 0
802 1 9 5.9999999999999998e-02 1.4995011577149293e+02 2.6706206617993092e+02 9.2150990078412505e+01 0 -1 0
721 1 12 -1.7999999999999999e-01 1.6009060177070324e+02 2.6293760654862120e+02 8.9466388747141721e+01 0 -1 0
821 1 9 5.9999999999999998e-02 1.5148091500032891e+02 2.7160648274699162e+02 8.9735962503235598e+01 0 -1 0
729 1 9 5.9999999999999998e-02 1.6187479129753788e+02 2.5459870652730490e+02 9.3186257298425900e+01 0 -1 0
801 1 10 -5.9999999999999998e-02 1.5049701888876388e+02 2.6744578206381084e+02 9.3012244454759923e+01 0 -1 0
810 1 11 -1.2000000000000000e-01 1.5062623705895791e+02 2.6899381055074690e+02 9.2897554473319786e+01 0 -1 0
722 1 9 5.9999999999999998e-02 1.5963355292816871e+02 2.6361032826486314e+02 8.8740680911712772e+01 0 -1 0
813 1 11 -1.2000000000000000e-01 1.5118972497348216e+02 2.6959027061483920e+02 9.1592338305651083e+01 0 -1 0
724 1 9 5.9999999999999998e-02 1.5928076384607004e+02 2.6285784156669052e+02 9.0191578443521493e+01 0 -1 0
789 1 5 1.1110000000000000e-01 1.5348987207851349e+02 2.6442519916069961e+02 9.0639280621555031e+01 0 -1 0
790 1 6 -1.8620000000000000e-01 1.5350123542164584e+02 2.6438255729820730e+02 9.2028764077276350e+01 0 -1 0
785 1 1 -4.7300000000000002e-02 1.5499311074246771e+02 2.6407260049990794e+02 8.9869108915889129e+01 0 -1 0
756 1 15 -2.2200000000000000e-01 1.5728615764179645e+02 2.6215942763204441e+02 9.2741377589680496e+01 0 -1 0
787 1 3 -1.3239999999999999e-01 1.5475649666411891e+02 2.6389017040767209e+02 9.2502507200081439e+01 0 -1 0
786 1 2 -5.7599999999999998e-02 1.5555962719378269e+02 2.6360176830474381e+02 9.1457520582140504e+01 0 -1 0
755 1 14 1.5300000000000000e-01 1.5649456923192821e+02 2.6256210425351202e+02 9.1698463735166754e+01 0 -1 0
148 1 9 5.9999999999999998e-02 1.5873245302171446e+02 2.5325209510436366e+02 9.2749894547990124e+01 0 -1 0
133 1 12 -1.7999999999999999e-01 1.5440140864880109e+02 2.5712730430120877e+02 9.2062447496887941e+01 0 -1 0
719 1 9 5.9999999999999998e-02 1.6057758315698817e+02 2.6185264310807787e+02 8.7749336920856280e+01 0 -1 0
734 1 9 5.9999999999999998e-02 1.5903120202118703e+02 2.5668273754210378e+02 9.3231781858395252e+01 0 -1 0
718 1 11 -1.2000000000000000e-01 1.6036571641032634e+02 2.6156917450533786e+02 8.8780287044805675e+01 0 -1 0
136 1 9 5.9999999999999998e-02 1.5534816906049599e+02 2.5765345542857887e+02 9.1940341948473218e+01 0 -1 0
829 1 9 5.9999999999999998e-02 1.5034705929994229e+02 2.6034319937806862e+02 9.3129975524344772e+01 0 -1 0
754 1 17 -3.9700000000000002e-01 1.5865791637190878e+02 2.6166714069943345e+02 9.4587461691145833e+01 0 -1 0
784 1 9 5.9999999999999998e-02 1.6767076422713245e+02 2.6323927990242498e+02 9.7670715436095534e+01 0 -1 0
804 1 9 5.9999999999999998e-02 1.5019713322508383e+02 2.6758014602546143e+02 9.5084830050209007e+01 0 -1 0
770 1 9 5.9999999999999998e-02 1.6301682474857026e+02 2.6297841463535059e+02 9.5530909751878312e+01 0 -1 0
777 1 9 5.9999999999999998e-02 1.6537810864868712e+02 2.6267597419451056e+02 9.6882903737187675e+01 0 -1 0
831 1 12 -1.7999999999999999e-01 1.4909890825720140e+02 2.6133434910220143e+02 9.4711427236697446e+01 0 -1 0
764 1 9 5.9999999999999998e-02 1.6073689064665609e+02 2.6314404360470081e+02 9.5641151696468384e+01 0 -1 0
840 1 9 5.9999999999999998e-02 1.5260880477871814e+02 2.5995931467461901e+02 9.4094137603623651e+01 0 -1 0
832 1 9 5.9999999999999998e-02 1.4828059192873957e+02 2.6061792612441991e+02 9.4639339607610566e+01 0 -1 0
833 1 9 5.9999999999999998e-02 1.4967449131166046e+02 2.6103086677946862e+02 9.5585900008077132e+01 0 -1 0
758 1 18 -4.8999999999999999e-01 1.5952565181466224e+02 2.5962991137653438e+02 9.3807821231734721e+01 0 -1 0
845 1 9 5.9999999999999998e-02 1.5462617671686013e+02 2.5860633801622623e+02 9.4964517726463342e+01 0 -1 0
846 1 9 5.9999999999999998e-02 1.5578891596027660e+02 2.5964131182982999e+02 9.4128405888367297e+01 0 -1 0
847 1 9 5.9999999999999998e-02 1.5608382339866907e+02 2.5914833953082837e+02 9.5773950663570915e+01 0 -1 0
844 1 12 -1.7999999999999999e-01 1.5529819953466495e+02 2.5945617713037456e+02 9.5083928017015552e+01 0 -1 0
838 1 11 -1.2000000000000000e-01 1.5332012197504915e+02 2.6077123808115277e+02 9.4245492939175065e+01 0 -1 0
772 1 11 -1.2000000000000000e-01 1.6451590231428062e+02 2.6134702897246183e+02 9.5283900023810716e+01 0 -1 0
735 1 9 5.9999999999999998e-02 1.5975803935955238e+02 2.5550046848922122e+02 9.4364355052086736e+01 0 -1 0
736 1 9 5.9999999999999998e-02 1.5983990149893458e+02 2.5727955567316008e+02 9.4650507404178342e+01 0 -1 0
733 1 12 -1.7999999999999999e-01 1.5986416630908653e+02 2.5648373595313581e+02 9.3906073261963257e+01 0 -1 0
834 1 9 5.9999999999999998e-02 1.4858779202313133e+02 2.6225538794770921e+02 9.4991690817861496e+01 0 -1 0
741 1 9 5.9999999999999998e-02 1.6400819354886599e+02 2.5575029766370730e+02 9.4381255532838864e+01 0 -1 0
768 1 9 5.9999999999999998e-02 1.6190915558744342e+02 2.6018997897582830e+02 9.5843852724414688e+01 0 -1 0
837 1 9 5.9999999999999998e-02 1.5182211850173076e+02 2.6181094407616308e+02 9.5663486735742921e+01 0 -1 0
836 1 9 5.9999999999999998e-02 1.5283099530854608e+02 2.6276894069697948e+02 9.4937613226047048e+01 0 -1 0
835 1 11 -1.2000000000000000e-01 1.5229451469712419e+02 2.6185513782419406e+02 9.4682166823522181e+01 0 -1 0
842 1 9 5.9999999999999998e-02 1.5492875565917078e+02 2.6154740290491378e+02 9.5489643548034081e+01 0 -1 0
841 1 11 -1.2000000000000000e-01 1.5436221686028253e+02 2.6062897816656624e+02 9.5335923708486291e+01 0 -1 0
843 1 9 5.9999999999999998e-02 1.5390402478503603e+02 2.6054827460710737e+02 9.6321645244058018e+01 0 -1 0
762 1 9 5.9999999999999998e-02 1.5865998101637811e+02 2.6244494452626685e+02 9.6562616046825198e+01 0 -1 0
760 1 19 8.9999999999999997e-02 1.5917770006234716e+02 2.6169457161657812e+02 9.5965114816539256e+01 0 -1 0
761 1 9 5.9999999999999998e-02 1.5906304596955687e+02 2.6068242786565429e+02 9.6353084231272447e+01 0 -1 0
765 1 9 5.9999999999999998e-02 1.6089241398863129e+02 2.6220609218066613e+02 9.7025250974702146e+01 0 -1 0
763 1 11 -1.2000000000000000e-01 1.6067446484212761e+02 2.6210424754990930e+02 9.5962130185784233e+01 0 -1 0
806 1 12 -1.7999999999999999e-01 1.4820593954727656e+02 2.6744818828057350e+02 9.4092961617645770e+01 0 -1 0
771 1 9 5.9999999999999998e-02 1.6322397718995180e+02 2.6212886993272821e+02 9.6880124552432136e+01 0 -1 0
825 1 9 5.9999999999999998e-02 1.5086127611509062e+02 2.6412181947019957e+02 9.4707173166361173e+01 0 -1 0
839 1 9 5.9999999999999998e-02 1.5388994574220433e+02 2.6097658406953502e+02 9.3339273100692495e+01 0 -1 0
766 1 11 -1.2000000000000000e-01 1.6185589828941261e+02 2.6121196309656636e+02 9.5468603303203778e+01 0 -1 0
769 1 11 -1.2000000000000000e-01 1.6315571557402993e+02 2.6193391137691964e+02 9.5809876204679014e+01 0 -1 0
759 1 18 -4.8999999999999999e-01 1.5738304609887325e+02 2.6360504779283337e+02 9.4676602532882214e+01 0 -1 0
732 1 9 5.9999999999999998e-02 1.6190355495895443e+02 2.5701306337222758e+02 9.4080321408402042e+01 0 -1 0
799 1 9 5.9999999999999998e-02 1.5219468847182983e+02 2.6680038154315400e+02 9.4140651759863204e+01 0 -1 0
774 1 9 5.9999999999999998e-02 1.6454284987632434e+02 2.6026659868974912e+02 9.5425480962915671e+01 0 -1 0
775 1 11 -1.2000000000000000e-01 1.6562668812603104e+02 2.6230108838924895e+02 9.5890044742790280e+01 0 -1 0
757 1 16 6.2900000000000000e-01 1.5770683085545846e+02 2.6258413426117534e+02 9.4107105056370074e+01 0 -1 0
776 1 9 5.9999999999999998e-02 1.6565973941517814e+02 2.6316043598004421e+02 9.5220321319180883e+01 0 -1 0
767 1 9 5.9999999999999998e-02 1.6177844418989841e+02 2.6105721961133958e+02 9.4392427053338537e+01 0 -1 0
744 1 9 5.9999999999999998e-02 1.6524311142609815e+02 2.5387564954550524e+02 9.4638930957949668e+01 0 -1 0
780 1 9 5.9999999999999998e-02 1.6721458279334809e+02 2.6087865431914781e+02 9.6457123659169199e+01 0 -1 0
805 1 9 5.9999999999999998e-02 1.4983413399001566e+02 2.6607458233646003e+02 9.4364398735126358e+01 0 -1 0
828 1 11 -1.2000000000000000e-01 1.5006871638964711e+02 2.6134330891103360e+02 9.3462249873408311e+01 0 -1 0
781 1 12 -1.7999999999999999e-01 1.6797313520690199e+02 2.6288230855895461e+02 9.6686213867028201e+01 0 -1 0
753 1 16 6.2900000000000000e-01 1.5881675072755090e+02 2.6057013708677351e+02 9.3640280804560447e+01 0 -1 0
778 1 11 -1.2000000000000000e-01 1.6711151022149997e+02 2.6184274934112949e+02 9.5959130855377651e+01 0 -1 0
782 1 9 5.9999999999999998e-02 1.6802402748894468e+02 2.6380334117835946e+02 9.6105516966403627e+01 0 -1 0
783 1 9 5.9999999999999998e-02 1.6896490991315747e+02 2.6246634431883888e+02 9.6863574055449064e+01 0 -1 0
826 1 10 -5.9999999999999998e-02 1.5133697826062266e+02 2.6225047100683423e+02 9.3606344049018162e+01 0 -1 0
796 1 7 1.4210000000000000e-01 1.5493639050076388e+02 2.6356647720711373e+02 9.3517032172395801e+01 0 -1 0
823 1 8 4.4400000000000002e-02 1.5084530743746285e+02 2.6373964188707635e+02 9.3686494324981751e+01 0 -1 0
773 1 9 5.9999999999999998e-02 1.6459916616866167e+02 2.6132417906743785e+02 9.4197325113693395e+01 0 -1 0
807 1 9 5.9999999999999998e-02 1.4770578688169726e+02 2.6712285281073258e+02 9.5005159042776640e+01 0 -1 0
779 1 9 5.9999999999999998e-02 1.6754621940282536e+02 2.6159052940619108e+02 9.4991911627512906e+01 0 -1 0
803 1 11 -1.2000000000000000e-01 1.4967567892331479e+02 2.6714488693175105e+02 9.4232342549435032e+01 0 -1 0
812 1 9 5.9999999999999998e-02 1.5113165746012083e+02 2.6940255538999435e+02 9.3772527544327090e+01 0 -1 0
740 1 11 -1.2000000000000000e-01 1.6442347218425238e+02 2.5538544162298447e+02 9.3441828180182185e+01 0 -1 0
745 1 9 5.9999999999999998e-02 1.6370721277688480e+02 2.5348398155799623e+02 9.3963520061036974e+01 0 -1 0
743 1 11 -1.2000000000000000e-01 1.6467500416820954e+02 2.5391641006864134e+02 9.3709580257474826e+01 0 -1 0
809 1 9 5.9999999999999998e-02 1.4808920514913251e+02 2.6852585799426441e+02 9.3978503946279886e+01 0 -1 0
742 1 9 5.9999999999999998e-02 1.6531105411414711e+02 2.5601766878074494e+02 9.3417597030467505e+01 0 -1 0
824 1 9 5.9999999999999998e-02 1.4979312952974064e+02 2.6377467656413495e+02 9.3404015525331047e+01 0 -1 0

Velocities

429 1.6426341089322248e-02 3.6738983537543172e-03 -3.3754592625994778e-04
430 2.8405802213867948e-03 6.2845473732590206e-03 8.1836928388084405e-03
428 7.2813617427780241e-03 -7.2850148959317526e-03 2.3292240469387983e-03
427 7.9506643143004985e-03 -2.6023439115297324e-03 -5.4181668574441110e-04
423 -9.8419842172323743e-03 1.1909619350696836e-02 -4.0831883587019923e-03
425 -1.2121275582555014e-02 -1.6390240101584643e-03 -7.9219089542322749e-03
424 -6.7836032196945109e-03 5.2068502204059113e-03 8.1209982825869117e-04
421 -3.0714420437461041e-03 5.6419720812454143e-03 9.2345043427803208e-03
426 -1.7470586109353720e-02 2.1998727138882101e-03 -1.1810388437046546e-02
367 3.6107262034593369e-03 -1.5573009055776287e-04 -2.8210269872439055e-03
369 6.7509323830309512e-04 3.2266596561528679e-03 -1.2485073352469923e-04
370 2.0358197419933194e-02 -3.1117835646168653e-02 -1.4415292915795254e-02
368 1.5715743539204551e-03 3.9776038748575576e-03 2.6182110331799009e-04
362 2.5454975617657302e-03 -3.1146865624525088e-03 -1.1361408365943295e-03
365 1.7200911414391917e-03 -4.2734432222017605e-03 -8.1352445679230747e-05
364 1.2023635949970702e-03 -1.8207833004224205e-03 1.4354123362299378e-03
363 -2.4576964948468867e-03 3.2103232077500912e-03 -1.2919648195395183e-03
408 -2.1985803112194127e-02 1.2427337738514408e-02 1.0240416130924497e-02
406 -5.8119417119731906e-04 1.0065114877100895e-02 -1.0741149140987994e-02
404 -5.1663932946049221e-03 -7.9090276138617625e-03 -1.8433420048497226e-02
395 6.8606232535817924e-03 -9.1835872296184770e-04 1.2310961071634932e-03
396 2.4623237258133953e-03 2.0697935187123594e-03 9.4036137517071201e-04
431 3.2150602630100922e-04 9.7883857040293181e-04 2.5517893803187141e-03
433 5.8969751576830676e-03 -3.4775050386110359e-03 -7.4840562807626885e-03
432 -2.7454637260460888e-03 -3.7207325650293476e-03 7.9805398083026922e-03
407 8.7529605535416181e-04 7.6860112419926000e-03 -2.7502866671391023e-02
420 1.8442763167238210e-02 -1.0933893399427151e-02 9.7884434252687273e-03
412 -1.0923611921107933e-02 -1.8639408767730129e-02 2.8642755113246479e-03
411 9.4697481048031679e-03 -1.2688199080781462e-02 -2.7725127857174351e-03
413 1.8914210176608669e-02 -4.6381351765136568e-03 -1.0992554892627496e-03
422 1.3384036912818804e-03 4.3432965536025772e-04 -8.2976985156171159e-03
410 6.1822428796890075e-03 5.4651780455124838e-03 -8.9371765698199254e-03
393 -1.1330487122062768e-03 -1.0784745624002716e-03 1.7182341462300386e-03
394 -4.3261118918632218e-03 -8.3569674552969747e-04 -9.0648511143925491e-04
398 1.6779523317842853e-03 1.4295575190034235e-03 -9.2786404739976531e-03
397 6.8229276349149673e-03 -1.6459755872372090e-03 2.0769520507025365e-04
402 4.1189767368038556e-04 -4.6650813027361796e-03 4.5430630650185235e-04
403 4.9253684948658560e-03 -7.9847788391070257e-04 -4.2349843182586295e-04
399 1.0828712863739237e-03 -3.9797047499438567e-03 6.4940659811842955e-03
401 5.4726627406722289e-03 -5.8458849343235716e-03 -7.0020225446339492e-03
400 2.0416119006070139e-03 -1.1345200102574690e-02 2.6499086381424970e-03
419 -5.3520080552871942e-03 1.8270496599578634e-02 9.7543441179962116e-03
418 -4.8810837418080859e-03 -2.4798396517708172e-04 3.7304610766540338e-03
409 -1.8186788604757913e-03 1.6431552830024263e-03 6.2715722008508459e-03
417 -2.0672665618532371e-02 -3.5823268763467541e-03 -7.3846681414921128e-03
416 -5.7441463600639260e-04 2.2474473312612611e-03 -4.0148124822488472e-03
414 -6.6985516368364380e-04 6.1620277244310323e-04 3.6667849728150379e-04
415 -5.6771709089560767e-03 -1.5331151568284396e-02 1.9670016287878836e-03
405 8.9953996949714427e-03 7.7645589421969658e-03 -3.5922737318563646e-03
195 2.9025780091924990e-03 -2.4862819412529418e-02 -4.1228860793057999e-03
193 -4.0301063779750283e-03 6.7408695508744539e-04 -2.9758615776516685e-03
196 -4.6051799287305127e-03 1.9533336133757406e-03 -1.0965506245281656e-02
194 1.0095488196059444e-02 3.7690946591884773e-02 -4.2844950855445933e-03
1043 2.4641917676278751e-02 -1.5880032266813650e-02 1.9186323298818298e-02
1042 -2.0353528233512958e-03 1.6163199759246578e-02 3.7209156855892915e-03
1040 -7.8740018610902961e-04 4.5838988918572455e-03 6.8313586789621049e-04
1041 -9.5918774794607441e-03 3.3857801120104228e-03 1.1151984208762204e-02
957 -4.1341737558819956e-03 -1.0821611816715409e-02 -7.5509436034890600e-03
1012 -8.0974694561141199e-03 3.3445857818761074e-03 -7.0854746663650409e-03
1014 9.8810720090660581e-03 7.7145575055216214e-03 1.9956697419548056e-03
1016 -2.0414144708594248e-02 9.4168553497898464e-03 1.9618037269016849e-03
1008 -2.0616354745955946e-02 -8.3843513642828885e-03 2.1112260146885938e-02
1006 2.7157621058623204e-04 -1.6165102218400008e-03 5.9878853433371140e-03
1013 1.5481141732362627e-03 6.2303696282630253e-03 -1.0694535573546687e-02
1009 -6.4711354608297999e-03 -2.5378400864847937e-03 -1.5355136232887484e-03
1010 1.6956978471809694e-03 4.8336397925778799e-03 4.8385025401336259e-03
1015 -5.6561127849939531e-03 4.4056258550411202e-03 3.9219749139721679e-03
1017 -1.3701509216231537e-02 1.4716630549185520e-02 -6.4469566800522248e-03
1018 7.9901325171723003e-03 -1.3891770944891536e-02 -1.2707601100474593e-02
1007 -3.8279992990904432e-04 2.8313164983443208e-04 6.2496957515434833e-03
37 4.9282991773674997e-03 2.6354248921392931e-02 -1.9602967660675701e-02
373 -5.1515695718486413e-03 5.2184422426948245e-03 2.9728785079002885e-02
372 -2.8525489726988481e-02 -6.5868550358657504e-03 -6.6285454275651591e-03
343 -8.3499812119634358e-03 -1.2991556611405143e-02 2.0793028375632936e-02
379 -1.0569195672868383e-03 -2.2410587793556965e-03 1.6264496443857895e-02
377 -6.0668994035340961e-04 2.0854027625366906e-03 1.2242107748525598e-03
380 9.9027476080671426e-04 5.9715426369655864e-04 1.5231689834663681e-03
385 6.7245630232320277e-03 1.4104597700872067e-03 2.2357607214223096e-02
378 -8.6241732350714473e-03 -8.9833302126880385e-03 -2.9104655657117211e-03
384 -3.0700438330998636e-03 2.6766728415768305e-03 -2.6029484374970736e-03
383 -3.3615293220338174e-03 7.0320898549534336e-03 -2.3784857156370636e-03
386 5.7877828959842260e-03 -5.6047400253140750e-03 6.7420433515590090e-03
387 -9.2708335541130879e-03 -1.9129140299810677e-03 1.7438244437096011e-02
388 -1.0909310514413227e-02 -7.9047723140735198e-03 5.6372581166571061e-04
317 1.2115331395379134e-02 -8.0739311707401801e-03 -2.7467690616999265e-03
318 6.1711332179102511e-03 1.1719709765513928e-02 2.2270692373609405e-02
316 9.0569500818087293e-03 -4.6205576771091396e-03 -2.5028958535920709e-03
313 -3.6442480616006682e-03 -2.0184200740838015e-03 -1.0329848503727299e-03
319 1.3610026864541531e-02 2.4918414610356470e-03 -1.8411923846276046e-02
371 -4.7171855352185635e-03 -5.7412791947651404e-04 1.0189034609564011e-03
359 -7.5368394428947097e-03 -3.0486425718392004e-03 -1.7991598725939561e-03
360 2.3925671905405308e-03 1.0939212209771482e-02 -3.0797272805241386e-03
366 -4.8135843397213159e-04 1.0129787446389431e-03 -1.7078638981589448e-03
302 2.0150882186972924e-03 -1.3364048859174594e-03 8.7174247481016046e-03
303 -7.5651657693702693e-03 -5.1573666238357505e-03 -5.2599198362347161e-03
361 -7.1420365058170847e-04 -1.8936233795070095e-03 -1.5862249870916469e-03
307 4.0488717762419343e-03 -2.3753586263566043e-03 2.4993724839406543e-02
375 -1.7755636901026879e-03 7.5287918215404144e-04 -3.9857083585113614e-03
374 -1.5304960893786214e-03 -6.0216591345159116e-04 6.2622053868256530e-03
344 2.2694971867202648e-04 -1.5295617886289158e-02 -1.2376804080451737e-02
315 2.2876218911582137e-03 4.7829632517089977e-03 5.7040724832638726e-03
305 -1.0721456634326589e-03 -5.4080092719187610e-03 6.3560394191515737e-06
336 -8.5840463224761444e-03 2.5126835843341713e-03 3.2448518887401782e-03
337 -2.9480934069739162e-04 -1.4700325026095470e-02 -5.0666856678782618e-03
312 -2.6730497941095412e-02 2.7777861126758508e-03 2.2404568122312174e-02
382 -8.1119107799750723e-03 2.0000431584882582e-02 -8.3551537626380627e-03
390 3.0017915898425829e-02 3.5844745671857851e-02 -8.4714384440259770e-03
391 -1.3160534313101306e-03 3.1507697875051252e-03 -1.7590958643552836e-02
389 5.0511654370722428e-03 4.2516496680006927e-03 -1.1902731060868544e-02
392 2.3665503846777795e-02 -1.2864510713235121e-02 -2.4974533223283538e-02
376 -8.9363590730985668e-03 2.4064324248278167e-02 -3.0029242079338365e-03
381 -2.4958030597291925e-03 2.8908366716344862e-03 -2.3122190121750721e-02
342 -8.8234701794687957e-03 -1.4094476838145578e-03 -1.1316988290126182e-02
341 -1.0883449960467310e-02 -3.1047234339512094e-03 -6.6713082942411999e-03
444 1.4670048991187668e-02 7.8908286228027476e-03 -3.3758664262478772e-03
434 -5.2070598566305807e-03 2.8622242643243541e-03 3.7754475352403550e-03
443 2.7235838949361828e-03 -1.2905274688796949e-03 6.6841339437821480e-03
435 -4.5646936279348342e-03 3.9769944607340657e-03 4.9866093192236999e-03
445 -5.4374145200003022e-04 1.6313178768340313e-03 -6.4336268968905500e-05
448 4.5292487066886225e-02 1.1983076835012150e-02 1.2703493841377624e-02
446 -6.8161445560867978e-03 5.9490258999597917e-03 1.7125267441815321e-04
449 -3.1745876585875152e-03 6.6178807854148682e-03 4.5225335112625839e-03
455 1.0015744905570861e-02 4.3937967786089526e-03 2.7516660390447863e-03
452 -3.2833883800097289e-03 1.0470553541973878e-02 2.1260747858218364e-03
450 -2.3711270384154277e-03 6.3709420330445143e-03 4.8722299525211900e-03
454 -1.1489532422977471e-02 -1.8418877360603645e-03 1.1482990179018335e-02
347 -2.4252062092149515e-02 8.8684079409488744e-03 4.4126692685124161e-02
346 -6.2005683511536982e-03 5.9964159733016083e-03 -8.3950833760621530e-03
345 -1.7079762205504021e-03 2.5084857639924643e-03 -1.5673945495770912e-03
352 -2.3466714028489266e-02 -3.0406823257639555e-02 -1.6255457528473606e-02
447 -9.4872318325364222e-03 2.7416458215639167e-03 -2.0662741843202530e-03
453 5.8809974251516723e-03 3.9892352260444716e-04 -6.1610986665817215e-03
437 -2.1598439126962713e-03 1.5998104227896884e-02 6.8136095930325180e-03
436 -4.3759826811448970e-03 1.0863547012970520e-02 4.6348645824340522e-03
438 -4.3862373571455868e-03 8.2451114351714489e-04 -9.7059399663826477e-03
439 3.5644512619644763e-03 -3.0828412105614522e-03 -4.3232846696618595e-05
442 -1.8967801969622430e-03 -1.7614337415615259e-03 -1.0498897180625886e-03
440 -9.7674330542371381e-03 1.4642988234436830e-02 3.0735027236908981e-04
476 4.6924318840446807e-03 -1.0044242161480584e-02 4.4478979979844045e-03
477 8.7767474309301974e-03 9.7115315930571353e-03 -2.5647028941801920e-02
479 -6.4892539563860116e-04 8.0419233365330578e-03 9.2665894999752335e-03
358 4.8815695287707317e-03 -3.3558820097522777e-03 2.6999139110268394e-03
301 -3.2509726822387841e-03 -3.2436649602320274e-03 -2.0858207751320184e-03
304 -3.0756631767661215e-03 3.4356021681595352e-03 -2.9476189199207133e-03
299 -6.9226908631502973e-03 1.3583012482168126e-04 -2.3892417969624737e-03
451 -2.5319888564127625e-02 4.2205195242307125e-03 1.2992066252538340e-03
456 -2.0525284071175416e-03 -1.9196948208948395e-03 -4.0567868641497471e-03
441 4.5410505205169295e-03 2.6730933096059868e-03 4.6965919486473022e-03
457 -4.8052850519745170e-03 -2.4827490603729326e-03 2.9919764864670814e-03
464 -1.4998328528443507e-03 6.8175218164882000e-04 2.9307149938185852e-03
459 1.0876573669287434e-03 1.5932256414853344e-03 -5.3761364575510241e-03
458 2.3065819121169057e-03 -7.0054436420647495e-03 1.1272268496335162e-02
462 3.5810575686308003e-03 4.7598405594254328e-04 -8.7050276867257654e-03
461 -3.0135618314206612e-03 8.9539108080937118e-04 -4.0716880073895720e-03
460 4.7278084198348726e-03 1.7535962183501824e-03 2.9977749901613886e-03
468 1.3662891776750181e-03 1.7821541610578230e-02 9.0102103815412563e-03
463 6.7306922020064896e-03 2.3580753216248408e-03 1.7618052850340905e-03
473 5.3203012007662547e-03 1.0066855318366078e-02 2.4364958421935385e-02
465 -2.0842584358213212e-03 -1.0965188440685441e-03 7.5489700054381260e-03
466 -2.9587060912600123e-03 -4.9582003295705283e-03 -3.6838115904308110e-03
470 7.9989207428736494e-03 -9.7654186064047282e-03 -6.4778624387120173e-03
469 -4.9255122084999152e-03 -2.7239375470898110e-03 -3.8065454787589454e-03
472 -2.1342903279192517e-03 4.4728276103676249e-03 -9.6861315392619449e-04
467 -5.5898105125147847e-03 -9.6685011283001963e-03 -6.4553007941815679e-05
475 -3.3629203018308072e-04 -1.4230692848387775e-03 3.6748027801175487e-03
474 7.6707627116583341e-03 -7.2427545269587879e-03 -4.1253844748035716e-03
471 -1.2096853594306333e-02 -1.4438833823156661e-02 1.2414425383117230e-02
626 1.0712954184846839e-02 -8.6412159930191260e-03 -1.4334646245824489e-03
623 -1.7349282602083719e-03 3.2683703318911435e-03 -1.9423724717064900e-03
621 -1.2662889962783041e-02 -7.3081290686497352e-03 -1.1836381070564408e-02
624 -5.0809236448389611e-03 -5.7335097006385857e-03 5.3469452460438742e-03
1163 3.6797650709822606e-03 1.6851110353314318e-02 -3.4374479293469517e-05
1166 -7.7726708941190286e-03 2.9504912442088493e-03 -1.6014943670611296e-02
1161 2.2343117378983029e-03 2.7960883964060312e-04 3.9988790312665669e-03
1165 2.6590028559464685e-02 2.2226539730565219e-02 1.9025472237522746e-02
1164 1.3886745893046631e-03 -2.4147775170039409e-03 3.1846196218091485e-03
1162 6.4117139589511254e-03 1.3189095440088880e-02 1.8392012641657431e-02
491 1.4705843141160249e-03 8.4734425420564382e-04 1.7732923797146520e-04
495 -2.3266577382531216e-03 6.3927830147935249e-03 4.4804178545239529e-03
492 7.2018474027062919e-03 4.8644068217974564e-03 4.6386387256806166e-04
1172 -5.3463268212581580e-03 1.2191468653782934e-02 -1.1487062820436095e-02
1169 -2.9617050986329219e-03 -4.9456436355825358e-03 1.3464101414470931e-03
1167 -5.1241150408741836e-03 -5.8205185697970500e-03 2.2133657432495592e-03
1175 8.6416406622980902e-04 1.4372675415680755e-02 -8.8406333211981034e-03
1176 -9.2726591033529624e-03 -2.9731135051955368e-03 -2.8493130162548650e-02
1174 -6.4806067923643121e-03 2.8460204978806919e-03 5.6273599592410201e-03
1173 -6.4694277175883219e-03 5.4296720759127986e-03 -7.1231432928502191e-03
1171 -2.4072818721169238e-02 1.2856066620883771e-02 3.3089051587749205e-02
1170 4.6098630352149157e-03 4.2147415792858928e-03 -2.1277822899764175e-05
1168 -2.4139346910105543e-03 -6.5581376114231303e-03 -7.7875204885171547e-03
508 5.5437051114790858e-03 1.1888793565871861e-02 -6.1971466148013528e-03
509 -5.3628538942484556e-03 5.4304899119622167e-05 -3.1710947165257248e-03
510 -6.8745198754625730e-03 1.4719510550040704e-02 -2.2968835851489282e-02
514 1.3713218131223528e-02 -5.2427562658936850e-03 1.1823250908645423e-02
507 3.4321727880331429e-03 1.2259422754292955e-02 -3.2667149483420754e-03
521 -5.5546983922501025e-03 8.4424939815509834e-03 1.0578188250711853e-02
519 5.2318242752074952e-03 3.1931843386440624e-03 7.0330834475553438e-04
511 -3.1673126319586636e-03 -1.0111683042461874e-02 9.9045024314716994e-03
493 -1.2092094280011069e-03 2.9980783101651545e-04 5.1161593857743468e-03
502 -6.9991509466365330e-03 -3.1529341671075711e-02 -2.8666835438114408e-03
1159 6.7003196666627531e-04 -3.1927934905973442e-03 1.2913066451111593e-02
516 2.7011967403342951e-03 -9.9305999288326423e-04 -4.9641121667437105e-03
496 -3.9971306937368230e-03 -2.7531002056044385e-03 -5.2492229760649220e-03
524 2.5234240301246227e-03 5.7831374215927761e-03 -6.7669207674514930e-03
526 1.4696798428895743e-03 -1.4931228237377758e-03 1.2443027283661597e-02
527 -7.5155846195368286e-03 7.5715745486374247e-03 -1.7086269086278760e-02
520 -6.1256696773678322e-03 -1.2720865730048937e-03 -2.2709641138528001e-02
528 7.3874454554537106e-03 1.0720750865058149e-02 -1.0590271867967262e-03
525 -1.0814649200884853e-02 -1.4203093994124610e-03 -2.3770869573684437e-03
522 3.6017277074834324e-03 3.0365413567657370e-03 -5.6596243629266439e-03
523 2.4369686192720095e-02 -1.0993075137118717e-02 -1.4480132847991984e-02
976 -1.5131824591587161e-03 -1.6360691644058858e-02 -2.1263530861242212e-02
969 3.3922016642258556e-04 -9.8037307999180906e-04 3.2526773769528060e-03
972 -2.0609891475345903e-02 1.4690976482488712e-02 3.4715201657958661e-02
975 -4.6949271896224382e-03 -1.0242555650354621e-02 1.1833166860179566e-02
974 -3.5252595804512242e-04 8.6612270083830968e-03 5.1635192383179670e-03
192 1.3990995329948939e-02 4.6772622324438443e-03 1.7931651805626048e-02
190 -1.3225974158422172e-03 2.3677281684223220e-03 -2.9993530747010918e-03
191 1.0945005067968958e-02 -8.9855005941198076e-03 -6.0261503323168720e-03
970 2.8000909823421411e-03 -5.3149089729854718e-03 3.1372966516793818e-03
979 6.1411244871388323e-03 -5.8594601411425017e-03 -1.8352425521158857e-03
189 -1.5330206023923553e-02 7.4912663849929914e-03 -1.4434960138269545e-02
187 -1.1285377611907630e-03 8.3896020720559614e-03 3.6920487100517586e-03
188 -2.4897627622698301e-03 6.5033202703150142e-03 -8.2726341552417336e-03
968 -3.1341942602514683e-06 -4.7002546669641584e-03 6.4489726496858718e-03
971 -3.0775920081224034e-03 -4.3009144487066441e-04 -2.4239155637270404e-04
978 4.3374851993671394e-03 1.8742667669579365e-02 2.1778297206672109e-02
977 6.8278146733193761e-04 -5.9356108839844976e-03 4.2698422405244383e-03
980 1.5028747754872438e-03 -1.1814367877488338e-02 8.6470378781562662e-03
973 -1.9548676883727354e-03 3.6751507374470642e-03 -2.3230424766627423e-03
185 4.7605635147521686e-03 2.1289491619043796e-02 4.9585137854695734e-03
182 -2.6521386707595968e-03 -3.4304578426365656e-03 -1.6293184299619349e-02
183 -9.8974083043002585e-03 2.8116915990397742e-02 -2.5876202010297156e-03
186 1.2265949705298353e-02 1.9959217280877517e-02 -2.2855261589256683e-02
1030 2.9394533611786185e-02 5.3198989082611572e-03 -3.0671935316447858e-02
184 -2.9328396423112112e-03 9.0802316317549862e-03 -4.0363663962111034e-03
181 1.2808079190793960e-03 -6.5004557370494532e-03 3.1135787812696623e-03
1035 2.3503162916217919e-02 1.3923348936351724e-03 1.9580535161158177e-02
1037 -2.2838927226301264e-03 -2.5574918050159279e-03 4.6110395053800858e-04
1039 1.3322266711687947e-02 -2.0887813748696499e-02 -6.3345950008738541e-03
1038 9.6400572980564103e-04 -1.5317136355719768e-02 -1.5221202537203317e-03
1034 5.1348976309121620e-04 2.5369418165985339e-04 2.5795912974898908e-03
179 1.1323583233755229e-02 -1.8638266146575450e-02 5.6772107274469753e-03
1036 1.4180195951831500e-02 -3.2022485492217173e-02 -1.0669152374587510e-02
180 1.4030890895912867e-02 5.5538409609763749e-03 5.8680128830219521e-03
1032 -2.2146560738230098e-02 -9.8581416825002082e-03 2.1456080166269063e-02
1033 8.8983357995088448e-03 2.2456884949713849e-02 7.1231401282558600e-03
1031 4.4263660642728606e-03 2.1988205366948975e-03 -1.0111835198347978e-02
178 -4.6051263755827881e-03 -5.8825864856314929e-03 -4.8095197331746685e-03
622 -7.3019291598959120e-03 8.3527981917382726e-04 -2.1409504326940051e-02
616 -6.0481870495794456e-03 -5.8642442735744003e-03 -5.9278511614699403e-03
174 1.4047917071272894e-02 -6.4394233834851999e-04 -2.3845531389218482e-03
173 -2.2830049901823063e-03 -1.9238864137007042e-02 7.7806817999829803e-03
175 9.3217938231008757e-03 6.9486498833003204e-03 3.3382371958635515e-03
176 1.5983843214764343e-02 1.0445587366290728e-02 4.3887756270980516e-03
172 -7.4805672090815824e-04 -3.3224498867177451e-03 5.1017774244897568e-03
625 -8.4345964404502795e-03 2.7756832404129562e-03 -1.6319077296615100e-03
620 -5.5229840867949635e-03 -8.1737427622722669e-04 -4.3549730434094980e-03
615 3.6624482600559109e-02 4.0211264215982395e-02 2.5429131814957880e-02
618 -3.1887383064525109e-03 -1.1001896075437110e-02 8.2862203097222257e-03
617 9.2240991581966911e-05 -5.6187372281709322e-03 1.3077516672792733e-03
614 -2.2098309025726788e-03 4.1421145677168697e-03 -5.1833925980634445e-04
619 7.7269581751449653e-03 -1.0542518410799801e-02 -1.9251125957714574e-03
610 -3.0874972559697179e-03 -1.9122436915758967e-03 -1.9455186717322374e-03
607 -1.0908434085695887e-03 -3.9022480011201479e-03 4.3275869532146995e-03
608 -5.9858957737620984e-03 -7.7223128309588775e-03 1.8370571370997086e-02
609 1.3972945861336445e-02 -7.6026491376530558e-04 1.3590057172272876e-02
605 3.3705841801788656e-03 1.3987574252030731e-03 -5.0614074453737157e-03
602 -4.9022519535096504e-03 4.6132360905956436e-03 4.7984262377692337e-03
603 -7.4957350906617566e-03 -3.5918645791506634e-03 6.1020228301979750e-03
631 -5.8464449200074931e-03 -4.4252877799887055e-03 8.4841047699600360e-03
627 -3.6441287679701536e-03 5.2487789792890890e-03 1.3242979308242570e-03
630 1.2347750418490865e-03 -1.2899811539880701e-03 -4.3413291085894158e-03
636 3.2320568612345028e-04 3.6965049961900191e-03 -1.8874914319002448e-03
611 -3.7786838360750834e-03 -2.5354103481877260e-02 1.1670045344031245e-02
606 -1.5499485746774979e-02 -2.8240113077078119e-02 1.9175122238237420e-03
604 7.7349673648603595e-03 1.0328115262728336e-02 1.1662748630355532e-02
1158 -3.1439440597774522e-03 -5.2155387507536750e-03 -1.7127008958405096e-03
1160 6.2889164769295777e-03 -1.4348477778981312e-02 -1.4650864110188060e-02
1157 5.7179904302879520e-03 9.5937681329948295e-03 -1.2883241908905132e-02
1155 3.2459507072181925e-03 1.4331398651177565e-03 -9.7031812651505005e-03
638 1.3628671809984713e-02 -1.6840335221299605e-03 1.8219002490216067e-02
633 3.5556456094361365e-05 -5.9668379380185116e-04 -1.3555177310383984e-02
637 1.0112730787875219e-02 -1.8744977989226998e-02 -1.4156637444193512e-02
635 -3.2093245868966224e-03 -6.6042067418476255e-03 -5.2774815105061440e-03
632 4.7629659492133959e-04 -1.0628985884051383e-03 -1.3904005781584457e-02
634 8.3913950898222150e-03 3.1192360551035640e-02 -5.3512815960480523e-03
1154 9.3286057757043985e-03 6.3598336889606685e-03 -5.0301071465838039e-03
1152 -6.6163842024446924e-03 2.0871681486575562e-03 -4.2674969623480736e-03
512 -7.4517190674110623e-04 1.9270566527913599e-03 -3.8968380917543447e-03
513 -5.2608674943323396e-03 -1.7557426828367993e-02 -7.1925860351291435e-03
515 -2.0467231920592698e-02 1.6864833271271792e-02 3.6110492462258250e-04
1153 -4.5614256145227921e-03 9.3337274741308041e-03 -2.3210788150065846e-03
958 -1.3579267561007566e-02 -1.4109221665889588e-02 1.5993227822763162e-02
956 -5.6603204802316330e-04 -4.6028288540038761e-03 -8.1011350557113823e-03
963 -8.3849848865542569e-03 -2.7186689569224261e-02 1.5736588459569111e-02
955 -6.1816626539491753e-03 -5.5313748023499681e-03 -3.9706382849016564e-03
964 4.9613177214432123e-03 3.8509829710737534e-02 1.7287813817864713e-02
967 -9.8060972767335438e-03 -1.8745387115411880e-02 1.4737801106322064e-02
965 -1.9464710097593617e-03 5.3290864420712861e-03 -1.3777986406769461e-03
930 2.4724533624354703e-02 -1.0102680358912030e-02 -5.8276576209913668e-03
950 -8.9000410943782735e-03 7.9505382526978653e-04 1.8270898133325615e-03
953 5.4853591836649771e-04 1.0746801264308013e-04 -8.2859706732205524e-03
966 -5.8575287365485642e-03 -6.9738006214528385e-03 -3.7879936359903879e-03
962 8.7399255849096935e-05 6.0459230832782479e-03 -4.1186600145320370e-04
959 -2.2939214196960891e-03 2.1043166536978573e-03 -7.0254799107850375e-05
960 1.1817534415647079e-02 -5.5849706186474274e-03 -3.1064394847984192e-02
961 3.3720303658279743e-02 5.2517792737700204e-03 2.4298759320092140e-02
929 7.2619234528671466e-03 7.1422911784096131e-04 -7.0029929126831343e-03
1029 -5.6678968754882608e-04 -2.1756810563823984e-03 3.0894417929024698e-02
931 -4.6382649403311745e-03 1.7225309019162211e-02 6.0862774540462383e-03
996 7.5810317628512347e-03 -1.7001849200742547e-02 -5.0705998284550496e-03
1025 1.1100209341626120e-02 -4.1917935614376352e-03 -4.8961273647854728e-03
1028 -2.2295908587881455e-02 8.2916652832235593e-03 1.0407720554801469e-02
1027 1.2988161581173182e-03 -1.9521766494986937e-03 2.6112815711948683e-03
994 -3.0912775865065484e-05 -1.8645780346421041e-03 2.0513342849649342e-04
1022 -2.2227304991486755e-03 -5.8133022671529261e-04 -4.5447743372376281e-03
1024 -2.2501003644946000e-03 1.3689645473356389e-03 -2.0954377272157615e-03
1026 3.9189014317586625e-02 3.4199558245369037e-03 -2.4047924428851246e-03
1021 9.4636728768320594e-03 1.7986176229533676e-02 5.8300051752545991e-03
1023 1.2032727470724865e-02 1.7739242130544387e-02 1.2128216269138709e-02
992 7.6271121219488557e-03 1.1064192098883947e-02 -4.9735826985278916e-03
1019 -9.2214871786467650e-05 3.7193352107573346e-03 5.1820346527545079e-03
1020 -5.3409641588386776e-03 -8.0900461691619605e-03 -1.9226628753482129e-03
983 1.3598139792607565e-03 4.6254599428268437e-03 4.3032617767786805e-03
986 4.3231811027426388e-03 3.7783061960514091e-04 -4.5320573505613438e-03
984 -2.7987569340875060e-03 1.8875883144877309e-03 -4.6849501166146664e-04
985 4.3288776292624209e-03 -1.4007571035512603e-03 -1.6169585640880050e-03
670 -9.8498916239578259e-03 -1.6357697813495067e-02 1.1637156354141506e-03
990 3.7045757435782167e-03 6.2625686035594624e-03 4.3795275669008564e-03
663 1.1548633202464201e-02 9.5877792532731972e-04 5.2720932581707090e-03
991 -2.8319692556308899e-03 -3.6870647393091286e-03 -1.9014039866866268e-03
997 -5.0713647480034830e-03 3.6947779830609141e-03 -3.1246106511172880e-03
1000 -2.6868079759428411e-03 1.2033258879131307e-02 -3.6642183016369072e-03
640 -2.8164308478953628e-03 -1.4895456364321354e-02 -2.4957243616243472e-04
639 -3.3632343023709131e-03 -2.0046069550367449e-03 -5.1653044458838007e-04
995 -7.8156545345697964e-03 -8.3288563032004534e-03 1.2791190835457432e-03
1002 -6.9195624554147363e-04 -1.2301765379742471e-03 -3.4837665162327958e-03
1003 -4.0530743147473344e-03 -9.8176226751696769e-03 -2.0592654281749442e-02
613 -1.0279529826246657e-02 3.5087681233892496e-03 2.2163497933306589e-02
612 -7.6298041477193624e-03 5.4280992147575135e-03 2.9823400936453475e-03
998 -1.6998474566304121e-02 4.5029380241044682e-03 -1.1437180869317101e-02
989 -7.1580439045365845e-04 -2.2954689553435955e-04 -6.8676135903486431e-03
999 -7.6750383140682631e-03 2.0666615989392970e-03 8.9511458079599541e-04
1001 -1.1780605762503711e-02 8.6865631904277894e-03 3.8882514699044263e-03
629 3.8573311155673763e-03 4.3261038676176717e-03 1.5055338936905124e-02
988 1.9718422247650908e-03 3.6585930257069126e-03 -5.1544228950691070e-04
993 -7.1005656748455168e-03 -2.8544156115690553e-03 -1.6212314371478131e-02
641 -4.4494798310177443e-03 -1.0491268341151076e-02 2.8497414423244247e-02
642 2.2650650457553103e-03 -2.2499976704218609e-03 -4.7407749093994955e-03
644 1.2393114860774566e-03 -8.7328727887970407e-03 -5.1985406521128583e-03
647 1.3211149294787829e-04 -1.1478620836067229e-02 9.4373528406926695e-03
645 -3.5576016428208136e-03 2.8089695512591043e-04 -9.1057445783976245e-04
650 -1.6034927222923948e-02 8.0298403181633341e-03 -8.4153249269454920e-04
628 -3.4697519979816293e-03 1.7021979071887012e-03 1.2118185329335785e-03
643 6.1938042179816065e-03 -1.7739518400373633e-02 1.0959634026487673e-02
646 -3.4859174409349954e-03 4.6515487370749238e-04 -9.0609647521090676e-04
648 -3.4576574721663896e-03 -6.8677763779554507e-03 -3.0238039943504733e-03
649 -1.4469824364491922e-02 1.3171626747739921e-03 3.2543129853525719e-02
651 8.4196716108938842e-03 -1.8488050310289821e-02 2.9611393016289577e-02
907 -9.3496685921424759e-03 -6.6404617430944907e-03 -7.7468596829683668e-03
912 2.1930959426946672e-02 -1.5900579160201590e-02 -1.3625562518514172e-02
905 -2.8346364119547812e-03 -2.5800697007437663e-03 8.2764050315680335e-03
904 -4.4837100763950099e-04 -8.0291903235254203e-03 2.8914064342822971e-04
906 -7.1078995838335631e-03 -1.4238951566139378e-02 -1.7622762285536032e-04
901 3.4077700368422030e-03 -4.8699159850870170e-03 -2.1971947890778607e-03
902 -9.6607507928200657e-03 -4.5566811870754193e-03 3.3263739417422099e-03
903 1.2167091160442603e-02 -1.6579723224486753e-02 1.4590887355548946e-02
899 7.2586918854559059e-03 -2.1912543259626346e-03 -3.9305815099737939e-03
909 -2.4198266794185409e-03 1.9975288467562013e-03 1.0928544526478191e-02
897 2.6864726742253053e-02 -1.7589036898646860e-03 6.3228247068833586e-03
896 -6.9993830753359515e-04 5.2597763803155862e-03 -9.3290627861875963e-04
898 8.0347190918234751e-03 -6.8735987595575608e-04 1.3603852469236575e-02
908 -7.4482447962780189e-03 -1.8688493488221102e-03 2.1601204744202239e-04
900 3.3300730581335865e-04 -2.4502002711241006e-03 -1.1714677638862385e-02
910 -4.5916190400854779e-04 -9.3375815259917130e-03 -3.1557485408387617e-03
911 1.8391467578648874e-03 -1.9167090333058426e-03 3.4431863717605689e-03
949 8.5505066156865671e-03 2.2110436925196100e-03 3.7836713593678586e-03
952 -1.0419404545575897e-02 2.9283377430864076e-03 2.5698003410867348e-04
954 5.6879271273499116e-03 1.2141542446556259e-03 5.4677091117273826e-05
927 2.4146850196464224e-02 1.5817441339848689e-02 -1.3675627164512590e-02
886 -2.8249910771693913e-03 9.5930678857489293e-04 -3.7628171622045486e-04
913 1.1237863892033281e-02 4.5772467756207960e-03 1.1162756106237109e-02
948 -4.8394070232960088e-03 9.4300114622379344e-04 3.0359473259138382e-03
895 1.1132096874792467e-02 -2.0403959592008147e-03 -3.1509151060974586e-02
947 -1.7728973547532826e-03 2.8201438470526340e-03 -5.1914360448178272e-03
890 -2.6068753848559191e-03 6.1624317419923750e-03 1.2719442834872908e-03
889 -2.2741240358391587e-03 -9.8726836524736525e-04 4.7540833139933462e-03
891 6.6890048316512222e-04 -7.9964805422660552e-03 4.5758383475583767e-03
893 -4.6116162946196271e-03 -4.3376716677108575e-03 -8.2812254120355928e-03
887 4.3729570658226618e-03 -1.3296127289388817e-03 -2.2630706641815824e-03
892 2.4043961015666727e-03 -1.2315771892895627e-03 1.6748425325414469e-03
1011 5.3615979372387910e-03 6.8269585081287892e-03 -1.0160154572998698e-02
982 -2.7669943566460708e-03 -6.0811466594136322e-03 -1.2883722294116788e-03
946 8.6839912300774418e-03 -1.4705224188689841e-03 7.0620386968878283e-03
951 -2.1418619440386534e-03 6.7245533367976777e-03 -1.8050517793734896e-04
682 -1.7042886187789735e-02 1.0553388418871417e-02 1.8031277624325097e-02
676 2.1083891662788283e-02 1.8341267856314771e-03 -1.8595286349583420e-02
50 1.5195100276531770e-03 1.2083324300053173e-02 -4.4761322298913653e-03
981 -9.4709696770230905e-04 2.7007891079457915e-03 3.7948942991804873e-03
47 5.6024662189413429e-03 -2.3177418621070085e-03 5.6922893731232238e-03
40 -3.0471221772576411e-03 1.6906328008522469e-02 1.9090367328433423e-02
39 -6.0919829893368131e-03 6.6604370696685209e-03 -5.1851493458305567e-04
49 2.1675307098319795e-02 8.1442729986803044e-03 1.2866940539156728e-02
41 1.6314272757643022e-02 4.3709390987751806e-03 1.2265918372171159e-02
987 1.3878936042514885e-03 1.6779870059400591e-03 -3.3350756164310710e-03
46 -1.1984648884569838e-02 5.5146714236436164e-03 7.9343931740093829e-03
44 -6.8348315490070321e-03 -3.6564249424549953e-03 -1.3939303330208324e-05
48 4.6151580322714237e-03 -7.3961425603941795e-03 2.0814150604079556e-03
38 -3.9064541008799122e-03 2.0692597225393367e-02 -4.6897752482909271e-03
35 -2.5558498544980897e-03 -3.9634736849126304e-03 3.5815631914321061e-03
1004 2.4727675098865899e-02 1.3042186993505459e-02 -6.6871927202178929e-03
1005 1.9295406670682139e-02 -1.0128850464027294e-02 -1.3568116869609848e-02
33 -2.2976436476299312e-02 -1.2607338027766842e-02 4.1316969764554285e-03
28 -2.4306489771767767e-03 -1.1911683257833438e-02 -6.4678497150397743e-03
24 -1.4078686740594327e-02 1.7257035416709938e-02 -1.3449916433671265e-02
25 -1.1075642898089124e-02 2.8673242556447385e-03 -1.6138052171591259e-02
27 -2.1389209053731546e-02 -2.6009094803779334e-03 -2.8576269505275372e-02
26 -2.6089965190635085e-03 -3.9574899121294620e-03 5.2703241611220687e-03
21 -7.6394358606227076e-03 3.5487272488054851e-03 3.5582849065009855e-03
18 -1.4814906367692495e-03 -2.0977528230829447e-03 -1.1621754503828871e-02
19 -4.6764131475943629e-03 -1.0705929459325701e-03 4.2111406078737352e-03
17 -5.7837372645122989e-03 -3.5360507968847173e-03 -5.9248306816209770e-04
22 -8.1422033698168338e-04 -5.8252074905635319e-04 -1.2714211392470805e-03
34 1.2959164526022470e-03 -7.1769398942119261e-03 2.5457912009688777e-02
32 2.1057254628802898e-03 -2.7873468252327558e-03 -8.1548389354794591e-04
30 3.6286866479427115e-03 -1.8876201757339936e-02 -1.8424965336916330e-02
31 -1.6418406864209629e-03 -4.0802162003119946e-03 -2.3569666583712984e-02
29 6.5042067762575498e-03 -1.8658905189731137e-03 -1.9261820456295787e-03
36 -8.6731751371765271e-03 -5.2765568013335463e-03 -1.5622627582617754e-02
915 8.0382369253252806e-03 9.9408594919390639e-03 -1.0980428386429420e-02
918 1.0044954085596076e-03 1.2029187496135034e-02 1.4310027231626119e-02
920 2.3666688226839521e-02 7.7405972722988164e-03 -1.1287574896935028e-02
917 3.6606849207722332e-03 1.1462546462009686e-03 2.9405941785090217e-03
919 -1.4523658810765909e-02 -3.2094958020060186e-03 2.3690194985988032e-02
914 1.9047837843692054e-03 1.0166457868987110e-03 -2.8959237151139363e-03
916 -2.4855274243910474e-03 3.8302472554631456e-02 -1.5734054583606719e-02
45 -2.7669523619916352e-02 -1.7656554033063234e-02 4.5914268906852002e-04
42 -9.3741451198571155e-04 -5.5635639578351433e-03 -4.7658277611436466e-03
43 -1.7615448886996510e-02 8.2921566314287133e-03 -1.4552263168188069e-02
56 8.9552785677263734e-03 -5.9076802749104965e-03 -4.5748312193109328e-03
51 6.3706099816154349e-03 -7.9119881543708147e-03 1.8752872408935792e-03
52 6.3688331636967315e-03 1.0439662372838852e-02 1.6281793405779104e-02
53 2.5032220217108343e-02 1.6200136105016760e-02 -1.3076109012255744e-02
55 2.2088102262954119e-03 -1.7008587168335174e-02 7.2230063722036730e-03
54 6.9451783003862825e-03 2.2336124740037220e-03 7.8177549287435967e-04
62 -1.6734186502477134e-02 1.8999542823862566e-02 7.4928594723476353e-04
61 7.0256735763609647e-03 1.0253204822312999e-02 -3.2958844361550754e-03
60 -6.5352942385469388e-03 1.9038413128877833e-03 -3.7109134040307036e-03
59 -1.9937014457887491e-02 1.3632475809435982e-02 -4.5872932142595130e-03
57 -8.0859560991414104e-03 -1.9086564405155712e-03 -2.4415447129995109e-03
63 -2.0748821129397101e-02 -3.8906972930221237e-03 1.8850196161843642e-02
58 -6.5055380396240635e-03 1.3194176806741960e-02 3.8394662821949581e-03
12 -7.0998362561435317e-03 8.4872194620647069e-04 3.2925670918114387e-04
321 -1.1474978612207561e-02 -1.4818870467041178e-02 -8.0035932911843473e-03
314 1.7906501165322862e-03 -1.2625926276132229e-02 1.4225855292064383e-03
322 2.5168432990049006e-02 -5.7411638045541877e-03 -1.1110995686868057e-02
320 7.6357844996433435e-04 1.1797435947819418e-03 -3.2908397781268627e-03
328 7.0340771403626951e-03 -1.7361608000416747e-02 1.8474249847425510e-02
326 -5.4471543620654440e-05 6.0236673459686371e-04 2.2080438934631019e-03
325 -5.4750382125487405e-03 -2.0367053184587119e-02 9.6634035380334946e-04
310 -2.3344837759007937e-02 -4.0737593139359828e-03 1.8187581347277573e-02
311 -1.4027274783535305e-03 1.8963852896762374e-03 4.4471681574209431e-03
308 -2.3868712593471319e-03 2.5425874635195472e-03 -1.7398898167335602e-03
298 4.6066715947774917e-03 3.7456226500558803e-03 -4.3453177498851579e-03
333 -5.8728210436520800e-05 -3.0461782464739598e-03 -2.0926475070963953e-03
338 -4.0308380492461030e-03 -5.4740204939843099e-04 1.1840832928688258e-03
339 4.6355835661826637e-03 -1.0697881698933086e-02 -1.6261504298555964e-02
309 1.3934362230294692e-02 -3.5617314415169144e-04 -9.2061768028171356e-03
334 -2.2091607885914882e-02 1.8515195071311608e-02 2.4786971559224405e-03
340 1.1946407787682849e-02 -1.1492834326080751e-03 6.7966656638960288e-03
335 -1.2258182460345353e-02 2.5656728855835815e-03 1.1286890211041034e-04
323 4.3251345621973516e-03 4.6514693214932444e-03 -7.6425512374777571e-03
353 2.3789626599546288e-03 -6.6696078600288452e-03 4.3197384833114473e-03
351 3.0212468855800523e-04 -1.9360785446595149e-03 -5.0241187549528209e-03
350 1.5135047094069440e-02 4.6149641521100939e-04 1.4678292730631006e-02
349 9.5197267488408594e-04 3.9411467344663336e-03 -3.8942888034380112e-02
348 -3.6415398930174669e-03 1.3035698706539531e-03 2.6230551172209287e-03
357 3.5293897844360387e-03 1.2219147967910357e-02 -8.8397770056128869e-03
354 -4.3464061300777504e-03 -6.0531189757879918e-03 4.5300320369582227e-03
355 -9.3434462614490202e-04 -1.0545990345909114e-02 8.4069925420655490e-03
356 1.0641528933245634e-02 2.2536510977843411e-03 -1.6460465661142471e-02
482 7.4232567116798371e-03 9.2634851389705227e-03 -6.4931358268130283e-03
481 -5.4924089161817492e-03 -3.1374439396088059e-03 3.2662736397673173e-03
483 -6.0609497132765216e-03 -1.5931992505540036e-02 -1.3700297374885494e-02
489 3.1453188373747345e-03 7.6819523877101337e-03 -1.3274436530285486e-02
487 -3.2890842492968695e-03 -2.0849816433398679e-04 7.7242738774672951e-05
486 -3.9840476040388243e-03 -1.3361062620807463e-03 -4.2523532970772390e-04
484 -4.5406447109849887e-03 8.6126228493801265e-04 -1.6658221235766291e-03
485 -1.5879364001285914e-03 -1.4780544127018682e-02 -3.1127396055769009e-02
478 2.0836140864312504e-04 3.7408169022406213e-03 -1.5048042148302252e-03
488 2.3823480490565391e-03 -7.3759231488398280e-03 3.7462721930310336e-03
490 -4.0026676066794994e-04 -7.3147780072508415e-03 5.1184329388054119e-03
327 -6.3047681459418260e-03 -3.1843970367987473e-02 2.2824537406727428e-02
324 -1.6392823932690283e-02 7.4108218545225154e-04 1.0124080254850128e-02
332 7.6473139793423086e-04 -8.8968757876654013e-04 -9.8975076152037923e-03
300 3.8139819917139689e-03 -4.9907344004850107e-03 4.1055381324717356e-03
297 8.9453578182420999e-04 -1.8429394529415999e-02 -7.1331863970473582e-03
265 3.4285248480741422e-03 3.0085290902511826e-03 -1.4694250327993254e-03
260 -1.8589853030248789e-03 3.3526223055371871e-03 1.9696128517863540e-03
295 9.0771651937340315e-04 1.1843970480260757e-03 -3.1493521630401723e-03
296 -7.1165540893248515e-04 4.9575514498388235e-03 6.2890015292186244e-03
306 -1.5591838380048798e-02 -2.2662349110098043e-03 -9.3998009437725361e-04
266 -7.2539697816714965e-03 8.3928347640740628e-04 -9.3780679022440368e-03
329 -6.8157876324976551e-05 9.5176541368048179e-03 -1.5618711637811423e-03
330 7.6446623099411699e-03 6.4399294097676283e-03 -4.8650251451977074e-03
261 -3.5057289358295688e-03 4.1780391212819694e-03 -1.9587691335223130e-03
331 -1.0443273209362671e-02 9.9556924085382626e-03 -1.9603937874300290e-02
262 3.0636828621633683e-03 -5.7869136526338821e-04 -2.0035412755360048e-03
269 -3.8062173419207311e-03 -1.1235267921338447e-02 5.2870184607806334e-03
267 3.9731809361454908e-03 -1.1728133953169862e-03 2.5673302616659776e-03
289 2.0904635543419469e-04 -1.5207460698264379e-03 4.4776348451262583e-03
538 2.5059197073928766e-03 3.0913325183919739e-02 9.4879090089265809e-03
290 -2.1171247636310779e-02 -1.2121277241940042e-02 2.2273066190925579e-02
480 8.0854653610045353e-03 -1.5750926997126023e-02 5.0846774312195255e-03
540 8.6426720971974989e-03 1.2823062208727108e-04 -1.6067640033543839e-02
541 -3.1914271369052989e-03 4.8540136740674316e-04 6.4878238588652708e-03
534 -4.7427366744542268e-03 7.0426243883332500e-03 -7.8755606570667623e-03
539 -1.2301886263566431e-02 1.3345894991433453e-02 3.6570712716107782e-03
537 6.5956207848802124e-04 8.0852873187036627e-04 3.2295835362053291e-03
536 2.9384106656751424e-02 1.0010970233271129e-02 -1.2126527227931519e-02
543 6.6684428190948762e-03 -1.8080008980254490e-02 -7.1437378162843993e-03
549 -1.6837781134431278e-02 -3.6387382975174884e-03 -3.0668960127301936e-03
546 -1.0614799103114714e-02 1.0061301785936245e-02 1.6331953623290280e-02
544 1.1366581938509399e-02 -1.9348709706126703e-03 -3.2930699326508299e-03
533 1.0056999123897863e-04 -1.0638107981737571e-02 -3.7129112651817751e-03
542 2.3649704429939654e-03 7.6940181896555087e-03 -8.8236014484673001e-03
552 -1.4152777465958717e-03 -5.4996093400839462e-03 2.2166101357885989e-02
547 3.9647164426347484e-03 -3.3361254425292551e-03 -1.5668012339058197e-03
553 1.3564742494330068e-02 1.2771366185371143e-02 1.0420834794550976e-02
550 6.0390978090019065e-03 -4.4179152765523968e-04 -2.1377562205317511e-03
551 1.0047145529416105e-02 -5.8545471309066368e-04 -2.9267424180649496e-02
548 1.4321428039042256e-02 -2.1438300757036694e-02 4.0396336073561211e-03
197 -7.1418821537274409e-04 -2.8187148821806046e-03 -5.5663679883867533e-05
258 1.4699584641004229e-02 -3.3610308687958388e-03 -4.6142505949163262e-02
256 -3.1127034114489735e-03 4.7641305482910030e-03 -1.0197547224423233e-02
203 -4.9747729965605731e-04 -2.3278426606666638e-03 -3.6696995729640887e-03
252 -4.3879639221473020e-03 1.4350151664358943e-02 -1.4475027107951654e-02
250 -2.7986801424042681e-03 1.4478144939155805e-03 2.7647747267467377e-03
251 1.2734452147780040e-02 -1.6201633398421759e-03 -4.2876868131254096e-03
253 4.9352589579396960e-03 6.0006709804726046e-03 -1.1755827321612139e-03
254 3.7831953432331451e-03 6.7185190147378672e-03 1.4393735038402470e-03
255 6.2543328155246645e-04 -1.8388936785000497e-02 1.2920851001254320e-02
247 2.2329965865173772e-04 -3.3230762496486090e-03 5.4531886443712580e-03
248 -1.8889786839190435e-03 1.9805078968641723e-02 2.2814445110468290e-02
249 7.2968359533667594e-03 -5.5961293119490500e-03 -1.1638886403406839e-02
204 -3.0783782917014513e-04 -6.6263283805129752e-03 2.1605389352854242e-03
206 -5.9869063155404793e-03 2.5730024931770994e-03 -3.5796990734733849e-03
201 1.5671837255623394e-03 -7.3248279000853100e-03 4.4624302403872178e-03
202 1.3607776599210808e-03 -4.3852764640298350e-03 -4.3034135820082609e-03
239 2.8329748261011492e-02 -5.4345223674723076e-03 2.6963801722009032e-03
238 -2.1514777705943715e-03 1.6313501118866021e-03 -1.2145995893009663e-04
207 -5.8887006894277718e-04 -1.6193656491385764e-03 -1.7829646477540240e-03
205 6.6246232120242641e-03 9.2280596176355801e-03 -1.8315417628108517e-03
209 1.0660721893901000e-02 1.3687895638858279e-02 -2.2985729137223344e-03
294 -1.0111023826808951e-02 -1.8538794332685338e-02 -1.4108333632811850e-02
288 -4.9665653166405862e-03 5.7002193361467097e-03 5.0516157838725109e-03
293 4.1051111559872759e-03 -2.8849963155856157e-03 1.5996457223052048e-02
292 3.7768882388370369e-03 8.1831053266669049e-03 -1.9925623789247650e-02
291 -1.5376295584570122e-03 -6.2736677721129536e-03 -8.2369321940070541e-03
242 2.8323008306679800e-03 9.5430069194582447e-04 9.2208181522268774e-03
497 -2.2338762884175187e-03 -1.7134976771806777e-03 4.6145999535784264e-04
498 -7.4650675495449821e-03 1.4003287489462123e-02 -8.0331605875090771e-03
500 3.5660372058454147e-03 -2.6201079234011329e-03 -2.4400075287020636e-03
499 2.2150276199512774e-03 3.7408622133536362e-03 -5.5243176514574118e-04
555 5.5851834176519170e-03 -3.0297576644712130e-03 2.9380713276416252e-03
556 -3.2014760975251238e-04 -2.8948464009585246e-03 -6.8692510258498468e-04
557 2.0626280500504152e-04 2.2293519347876831e-03 3.4654028874429015e-03
562 3.3889994613501319e-03 3.8520745414685918e-03 1.2136733650564119e-03
503 -1.2161197034964861e-02 -4.6063963753986970e-03 1.8171916922638427e-02
285 -1.7437237791658468e-03 5.1129386553663315e-03 -2.3151865356491113e-03
286 3.3376016607720958e-03 1.3824027798717789e-02 -2.0175741240577638e-02
240 -2.5620951117117019e-03 2.6947828836542996e-03 4.4686660304970567e-03
241 -9.1959001164687131e-03 4.7229647126133629e-03 1.7705705383622535e-02
243 2.5072142304097436e-03 1.8217099229367328e-03 -2.8553227935466732e-03
245 3.5932314526205531e-03 -1.4460580085787419e-02 9.7801771048501899e-04
244 2.7991865122828901e-02 -2.0105803321389770e-03 -7.3965210039195093e-03
535 -7.8712864496448577e-05 1.6132794503808740e-02 -6.2133465115277566e-04
517 -4.7268207182250841e-03 6.7329657582807976e-04 2.3094562072793682e-03
505 -8.2400129172812749e-03 -2.8589660474413014e-03 1.1330637448071799e-02
504 -2.6359290620551730e-03 3.4070875993729897e-03 1.7445775029809282e-03
545 1.0815016185384782e-02 -1.7784986878676746e-03 -3.1818028094661960e-03
531 -1.2459446819819574e-02 2.7174734129545439e-02 -2.4051424969631446e-02
494 -1.7491767166272715e-03 2.5263758085387238e-03 2.3209624159344788e-04
529 4.3878523375859733e-03 -7.4847488605702718e-04 1.1770994006808462e-03
532 -4.8269085450650543e-03 -2.2272806626219407e-03 -4.8891884781569628e-03
501 -1.0499440918114793e-02 -7.7501596734635293e-03 -7.5260543334827760e-03
530 3.2042792194113184e-02 4.5398263977179318e-03 2.2069613184382418e-03
506 -1.1663054495078486e-02 1.1423900888157918e-02 4.4711325626509753e-03
518 -6.0704578982092562e-02 2.7163763832344121e-02 -2.9948094990841783e-03
177 1.6472895489871757e-03 7.1486021190053416e-03 -3.0240976796205008e-03
166 -1.4021480693361399e-03 -5.2103046441378193e-03 -1.8528692610924981e-04
171 3.0377056745989734e-03 -5.6368523046532457e-03 -1.1600173876230767e-02
170 4.2518190576692295e-04 6.7707264926631840e-03 7.5243245000815818e-03
165 5.7497904579513924e-03 2.5305618411957864e-03 1.3068757777049606e-03
169 -1.0819448866441841e-02 -6.4171799071262494e-03 -2.3408651227192884e-03
106 -2.0710103647597444e-03 -4.0065223533156443e-03 -1.0881748353582786e-02
164 3.5734514627575307e-03 -7.2203132685751126e-03 5.3810371530818287e-04
163 6.0482176487048631e-03 3.2471716381628477e-03 7.8301467468123564e-04
168 7.1797647733315324e-03 1.0195607606816313e-02 3.8367165780207593e-03
167 2.8848407333965692e-03 -8.2272751469307450e-04 3.1664709309849113e-03
198 -1.1693238397761638e-02 -4.1469609505598859e-03 1.5435407855789727e-03
162 -1.0827462025438995e-03 5.8104853627257303e-04 1.5690790748313034e-03
257 -2.0987474467483360e-03 -1.5570722086228330e-03 -1.2560702522108200e-02
259 8.6196135159579187e-03 -1.9667875480611561e-03 7.0062785420840906e-03
592 1.6802260530208067e-03 -2.4523276172304640e-03 -4.6541550404679104e-03
599 4.6981962899853995e-04 -1.4304910273992722e-03 -6.8087334003304719e-03
598 1.1291648840537941e-03 -8.2757133008375793e-03 2.2663234027979410e-03
595 3.0489901686276718e-03 -3.6003848851043512e-03 8.4497554462657667e-04
593 4.5890657009207397e-03 -1.0063569783017670e-03 1.9589113633563613e-03
594 -3.0236588594202804e-03 -4.3444452754638268e-03 -4.3961061991728322e-03
589 -2.4936868720699672e-03 -5.4598997398665403e-03 4.4918073830182319e-04
237 -1.9260415048796151e-02 1.1803199895010289e-04 -1.2063326783418307e-02
199 3.3264105386239800e-04 4.5927248822049301e-03 1.2508124744061739e-03
208 -1.2995417364663931e-02 1.5405044792400730e-02 -4.7520553551711579e-03
1093 -9.8991572087331337e-03 -1.8757546597839174e-02 1.4576693068155079e-02
1156 2.0987696552685599e-02 9.9237230276321958e-03 -2.7747306681137405e-03
554 -3.1502261593666964e-03 8.4307431856588556e-03 -3.9156566879272039e-03
1150 -1.9694469535341853e-03 -2.0321162418516928e-03 -1.1911049352666811e-02
1146 -1.1725323107866963e-03 -1.6252939554964531e-03 6.4755316977796974e-03
600 -1.3571904401822165e-02 -2.0568658020652712e-02 -7.9559272429872725e-03
1145 -4.2747698478702552e-03 2.0584474290079912e-03 -4.1070215141975116e-03
559 -2.5837937314357969e-03 -5.2220148358523134e-04 -6.0265417665528870e-04
560 3.4016249770688839e-03 -5.3728128725046590e-03 -2.8778514812650303e-03
1085 1.4535443205093174e-03 8.9041874265450031e-04 -7.8197695961047125e-04
591 4.5287003455852072e-03 3.6322954975361059e-03 -1.4721566987263175e-03
590 -1.7484314562365116e-05 1.6645923433072874e-03 -5.0485750354617338e-03
1087 -8.7265897598237246e-03 -2.6411624115471877e-03 7.0858294475089423e-03
1091 1.1753830508434039e-02 -2.4913064830604348e-02 -1.5913030361973394e-02
1086 -3.1413254471620577e-03 3.1475618477777739e-03 -3.4312484298923943e-03
1143 6.9777463817540560e-04 4.1445077708890914e-04 -7.9415667992944455e-03
1144 -1.0431588560920574e-02 -2.8912509100890290e-03 1.3181236821324365e-03
1142 1.6787230969387168e-03 -2.6454406071853504e-03 -3.4457020002152792e-04
1148 -1.7804318871929522e-03 -3.6084711134774751e-04 3.1898799865852480e-03
561 -2.2719026964712272e-03 1.9903920702739361e-03 -5.8076477524737541e-04
1147 -6.8931025191381029e-04 4.0583336968624158e-03 1.1939901631718821e-03
558 3.7691403067184330e-03 -1.9464521233148323e-03 1.0607320452085715e-03
1151 -4.8132123340884573e-03 -8.2712796017330315e-04 -4.0310827445528595e-03
1149 1.9640733335106980e-03 -4.7316533416231875e-04 5.7247735022893315e-03
1178 -8.7962629136828941e-03 -9.7083260867714839e-03 2.3021061661415571e-03
932 -1.0393124152926793e-02 -5.7923654052320188e-03 -5.2391620597091624e-04
928 2.4673608596751527e-03 1.1881781063519890e-02 2.7792498863212164e-02
669 6.0106753352174519e-03 -1.3463313356010443e-02 4.5957340589810065e-03
668 4.5966377559546428e-04 5.3427111256002316e-04 2.6817374543679807e-03
664 1.3194820531403492e-03 6.2113269874583448e-03 2.6062685746039281e-02
662 -2.3562254251840386e-03 5.9317252115236472e-03 -2.7772400926132463e-03
666 2.1613657835760362e-02 -6.4663765894192793e-03 -2.8095482918209548e-03
665 -1.4913916489473259e-03 -2.6901270304526292e-03 1.5748860140003839e-03
667 -5.8100821397259446e-03 1.6904558644097501e-02 -3.7030023895211862e-04
656 5.2189137417916662e-04 -7.2383908329526694e-04 4.2324260663026483e-03
655 -4.5661395112673473e-03 -1.2854606522371725e-03 -2.2951449143576094e-03
105 9.0695017376562191e-04 -2.0697130375736863e-03 -3.2548670003423783e-03
661 -9.1900900252273401e-04 1.6596881346062570e-03 -2.1809090541447559e-03
99 -3.7602889934648456e-03 1.5001044442479279e-03 1.6647060654579999e-03
100 -1.6846485366870301e-03 6.1861275409674449e-03 4.8802078217083178e-03
103 -5.5093398845553181e-03 -1.1417554516401785e-03 6.1593442894578541e-03
108 -7.1712604037116995e-04 -1.0489350989753669e-02 3.2403837299246319e-03
659 -3.3408184464338415e-03 4.7192357326164523e-03 2.0861703694304826e-04
658 2.8171966917254188e-03 -3.1248072819073428e-03 7.8502319906216221e-03
660 -2.5483898195538227e-03 -1.9735788753202548e-03 3.3610638028202630e-03
597 3.2744584942523830e-03 -7.4911672352746001e-03 -2.9200248127245290e-03
1044 -1.7540887876325822e-03 1.5110293017502462e-03 -2.7737568971581620e-03
1045 2.5952235642174497e-04 8.9139688574533023e-03 -2.9318967488551240e-03
596 -1.4919483138782961e-03 -3.2349673044854855e-03 3.9129599564336279e-04
1046 2.0792041281576220e-03 -1.8534848240694178e-03 3.5286487042915141e-03
601 5.4084740364887963e-03 -9.2299786350411653e-03 -5.3611501660258982e-03
1049 -1.1000125329480341e-03 -2.3469689829309732e-03 -1.0148194182154428e-04
1079 -1.9272699150517248e-03 -2.7024754253676821e-04 -5.3585052117054253e-04
653 -3.9570604990564959e-03 9.4906672355537531e-03 7.6386376949438676e-04
1050 2.9704297587504502e-03 -2.4687560495805145e-04 3.7321624053439691e-03
1080 3.0119561224566716e-03 4.9962344958496619e-04 2.8357860761988470e-03
654 -6.9497262456535477e-03 -3.4155588114148706e-03 1.1120853093757677e-02
657 -2.5296423600227277e-03 6.8982423925712782e-03 4.6156686000642516e-03
652 4.2012212081639399e-04 2.7730382269001938e-03 -3.6551632190684378e-03
1090 -4.8104758001911675e-03 -1.6837804614685714e-03 -7.0054010988413763e-04
1081 1.1926555605366689e-03 -2.0609852798559743e-03 4.5979981116017893e-03
1051 1.5960394723996312e-03 -4.1114701626204196e-03 1.3015957969166618e-03
1053 -2.0763165217241300e-03 6.9074824198736475e-03 8.6570833588900538e-04
1084 -4.8600469887296101e-03 -2.6466329461315927e-03 1.4499725429824204e-03
1083 -3.4174564106978756e-03 -5.0908775287940378e-03 2.8203339992502177e-03
1089 -1.5703328702849459e-03 1.4715522842392037e-03 -8.9846928126092618e-03
1088 6.5598143668458451e-03 1.0375523399660457e-03 5.1228948734357745e-03
1131 2.1545636056607533e-03 -2.1951064209449745e-02 2.9209118931051225e-02
1137 1.4538217673393895e-02 -1.2953963201389181e-03 -1.0040592394509062e-02
96 1.0958171778150960e-02 -1.6060249379111426e-04 8.9825943312546522e-03
95 -7.6667929689586503e-04 -4.8424684589963444e-04 -2.3872781493141262e-03
92 2.8931576118210226e-03 1.2734324849943513e-02 3.8240139130181856e-03
93 -1.2875751280293820e-04 1.1337560654006439e-02 3.4782287839154963e-02
894 -1.0001619639720036e-03 1.0361141943801663e-02 5.8818339760600136e-03
90 2.0083103554656929e-02 -6.1851408934804255e-03 -1.2954751185558845e-02
926 -7.4675812038032380e-04 2.5562184314818254e-03 -3.7692498843672801e-03
681 -6.2875279219394599e-03 1.8046248902150338e-02 6.4661117468274307e-03
675 7.9174664159252783e-03 -2.9284711239226081e-02 -1.3003868251983079e-02
935 1.0765238025479735e-02 1.5101474337804965e-02 2.1330709696439479e-02
934 -2.1772467005732092e-02 9.6010266039879607e-03 -1.5359768445809684e-02
942 8.4375933437703388e-03 2.4905907601805921e-03 3.1074774605996257e-03
943 -2.4098425999775915e-02 2.2309540652639659e-03 -3.5915501797111229e-03
945 2.6608288612594579e-03 -1.4576341537229254e-02 -9.2117623711880543e-03
922 6.1953300798719632e-04 1.4703805582166414e-02 1.4890528034981353e-02
98 -2.1571272489075786e-02 -2.5103530667044942e-02 3.0883597046351828e-03
940 -3.0006703261646001e-03 -1.3266134556402666e-02 2.2162487305102431e-02
97 -8.2473778282722617e-03 -1.9288138875625711e-02 2.2516025200244452e-02
89 -4.6577360164735108e-04 -4.8760684697089808e-03 -2.2323948382133424e-03
91 -4.4484210461709410e-05 5.4014476149981125e-03 3.1919542177384960e-03
680 9.3428202045194183e-04 1.9014920435779525e-03 -1.6855701540459073e-03
933 -4.2397146029085897e-03 2.2989262463940677e-03 8.7517636297064477e-03
941 -4.3201087745616202e-03 3.6254693641888354e-03 8.8860557802739101e-03
939 5.0174118819298020e-03 2.9454240100041892e-04 7.5901093290700761e-03
924 8.0534226039274720e-04 5.0064348538568868e-03 3.4445800938863896e-03
925 7.5294270029591451e-03 -5.2390020495308859e-03 -6.2232077634515100e-03
888 -8.5201876459454050e-03 -5.2154597933663418e-03 -4.3248432323590355e-04
936 -7.5212071618091796e-04 -4.9458786442052550e-03 2.2502746577599936e-03
938 -3.8739151059254493e-03 -4.3627339007059236e-03 -2.6471551029774356e-03
921 8.5300577944050649e-03 1.7605120584919952e-03 6.5999338146407712e-03
683 -7.1360669848045814e-04 5.7728192614967316e-03 7.9759217593222218e-03
686 -1.4838299223130192e-02 -9.4102565612294697e-03 -1.0687346092154793e-02
923 -6.3717712522703366e-04 2.4016093321925286e-03 7.3726350867491727e-03
937 -6.6636173026768976e-03 -5.7863900272162013e-03 -6.1343918684274683e-03
85 6.4073540302749853e-03 1.4331145933456257e-02 -4.1583437108321815e-04
685 1.9701445747645999e-02 1.9067116823943936e-02 -1.1897321785791950e-02
4 2.6123464394008046e-03 -5.0261978880182211e-03 9.3983214395447902e-04
671 -1.2517137580296961e-03 -9.2174856718893992e-04 -3.8220264274265348e-03
672 -8.5820983448910929e-03 2.6041900742748723e-02 -8.1962723817353685e-04
678 -1.7053716870351544e-02 1.2140932430167940e-02 1.9438564675332934e-02
673 1.0987432649906329e-03 -1.2639185204865714e-02 -1.1424646711918864e-02
684 1.0538888673554871e-02 2.5887794660747953e-03 8.6750884057918750e-03
674 -6.0177917268870694e-03 1.2695677718394668e-03 -5.8245094281116549e-03
11 -2.4489182139300446e-04 1.8669500036152900e-03 -1.0115808874847562e-03
679 -6.1907559326470542e-03 -6.7090776569740593e-03 -7.1604094841861404e-03
677 8.0469500225027692e-04 5.7604727551084081e-04 -1.5318844004912002e-03
13 3.0552884724728605e-03 -8.2210502491750666e-03 1.9989901226393540e-02
9 -2.4202222753685726e-03 3.2184852997512881e-03 1.8884827391774509e-03
69 4.7231156538703227e-04 -6.9797467976086605e-04 -3.8023674588444100e-03
8 -4.5369981733327088e-03 -8.8485425295549217e-03 3.7312679439840215e-03
7 5.1181736313613501e-04 -8.4703609648034695e-03 -1.7001566549803666e-03
72 -3.9123936068143081e-03 3.3285014743589152e-03 -9.4733374654322152e-04
66 6.9996868370578364e-04 4.4092921166295354e-03 -8.4040115706115713e-03
70 -6.5512993624877334e-03 8.5439499175060281e-03 3.5263611022372738e-03
65 -3.0978430875860411e-03 3.6081613788833526e-03 1.7858660631458966e-03
64 3.6083967320438563e-03 5.5731055936002818e-03 -1.3322263327776669e-03
16 -9.4538532690293664e-03 7.9143125443256034e-03 -3.0355441119368960e-02
14 -2.3841398749146446e-03 -7.4635953083201619e-04 1.1509383462678044e-03
23 8.7038337808642910e-03 -2.1705324941465973e-02 -1.3472729329108105e-02
20 7.0159470387254688e-03 -3.2905176836989661e-03 4.4554205323533791e-03
1056 -7.5721502376170560e-03 -6.1756893045965197e-03 8.1650987851013285e-03
1052 -9.5395649346889221e-03 4.5071544203826377e-03 1.0001194320773451e-03
15 2.6195642063413793e-03 1.3272858821391096e-02 -2.6970391037606570e-04
1067 1.6602854218836546e-02 -1.1593663603371268e-02 1.2119502563668606e-02
1047 5.8448254196938393e-03 -5.1245547049754477e-03 4.7328873640149257e-03
1064 1.2402323292428064e-02 2.2726718653221173e-03 -5.1055258009328032e-03
1048 -1.1958795559835888e-04 -4.5283611629868070e-06 -3.3285691823880434e-03
1054 -8.9018958160310482e-03 -1.9224589549448610e-03 -5.4917196765561435e-03
1055 1.4240443212266722e-02 9.4409714241448454e-03 -9.1779882616495594e-03
1058 -1.3741393883576737e-02 7.4290341383081568e-03 1.6709555521460602e-03
1061 -8.9569594637987672e-03 -1.0563851422862631e-02 6.3667230223328477e-03
1060 9.0890329254840723e-04 -1.9582519859964731e-03 -2.5453815519335806e-03
1063 -6.7740315841480526e-03 -2.2783387401204701e-03 1.3373990700537713e-03
1065 -2.0347870382434005e-02 3.2710224925860945e-03 -1.1910925797966864e-02
1062 1.4657175549055322e-02 1.0541696809164534e-02 -6.6482132988103688e-03
1057 5.1393310811567597e-03 4.8381679468113862e-03 -7.5175625385310125e-03
1059 -1.0198550517332504e-02 3.8829592673521661e-03 -6.4528735042729555e-03
1066 9.5074426904149106e-03 -6.5182732377709806e-03 4.8352120464510004e-03
1068 1.3598953172090604e-02 1.5962569766952452e-03 6.0757369864039316e-03
857 3.1433304625952709e-03 -2.1254712382522060e-03 -8.8263431503491404e-04
866 9.3788470755272087e-03 8.7296767202690462e-03 1.5999051098435534e-02
865 -1.0609361655066162e-03 2.1634705368181389e-02 -2.6861066182758953e-02
864 2.1471372963017777e-03 -6.9355185615937905e-03 -7.3039269713147366e-03
860 2.4336038009832802e-02 -3.6399666726710779e-02 8.5458715006618523e-03
858 5.6142177215669367e-03 -1.4187884054527311e-03 5.8454263506675999e-03
852 2.8628097597853883e-03 4.1277621040275323e-03 8.7790001756087857e-04
855 -8.8040232447233959e-04 -3.1596738063064166e-03 2.0512892903693626e-03
862 8.1779120172996017e-03 -8.7793676097266196e-03 -6.9444331983536440e-05
861 8.6137953351858275e-03 9.7261364272137091e-04 5.7105498920904387e-04
885 -5.4749759253688223e-03 2.2961880206723681e-03 -3.1403646068442752e-04
883 3.4885753571162808e-03 1.9017637956436925e-03 2.9149333952107276e-03
851 -2.4965852758355462e-03 -4.6144122118327389e-03 4.7093876374828692e-03
854 -5.1299161293752778e-03 -1.1439090474410904e-03 6.5900682484263690e-03
884 5.3236118311600729e-03 -5.6032927618413428e-03 3.7032405957021525e-03
853 -4.9500382055285641e-03 1.0930132776371749e-02 6.6427120293374000e-03
848 -3.6369686888773705e-03 4.6699000462560166e-03 6.8286010410691387e-03
850 2.4040797578608959e-03 -1.1585766630612970e-03 -4.7822723571898699e-04
849 1.2164691403449675e-04 -6.7084638728568779e-04 -2.3898817227029283e-03
792 -3.0943471364011101e-04 -5.7530625092664170e-03 7.0627202529566669e-04
791 -2.6281536641910661e-03 2.0523201651461806e-04 -5.2610082549106509e-04
882 7.2550140030688184e-03 1.3600761327314692e-02 -3.9637084243628867e-03
6 -2.7943587482983021e-03 2.1185596055032637e-04 -2.5790629796514065e-03
10 -3.1079497985907261e-03 -4.2342735892132851e-03 3.2038028277813759e-03
5 4.6824446151927518e-03 -2.5834210049992526e-03 -1.7004854088016022e-03
1 5.9121123161902265e-03 9.9900719378988897e-04 2.6062465089457027e-04
3 6.4932335227867012e-05 -3.0290645503602536e-03 3.4911846432233037e-03
1070 6.4965318451189694e-03 -1.7076527701340608e-02 -9.6791713070753967e-03
2 -3.6621620411147007e-03 1.4869664758475093e-03 2.8569442731047690e-03
1177 -1.4238556713925314e-02 7.1408740653962138e-03 -1.3731301943730716e-03
1069 -1.1298539867339879e-02 1.0325201870214342e-03 1.1440499309501701e-03
1071 -1.9068683000950222e-02 9.3194034322117720e-03 -8.0038864997851369e-03
1072 -9.8741061092983765e-03 -5.4112079899128265e-03 -3.9597522511497269e-04
1073 -1.8439399357669514e-02 -6.9079607040841342e-03 -2.2713966922695062e-03
1074 3.2981486648782490e-02 2.5892776164355383e-02 -2.7569454250359814e-05
1077 -7.4871263589098317e-03 -2.4683558612318041e-02 1.9803690772881771e-02
1076 -1.1381700133710291e-03 1.4991232494012883e-02 3.4186068424634725e-03
1075 -3.2061702026996391e-03 -4.3666334239733309e-04 4.8319932744596015e-03
1078 -1.8763401551466319e-03 -6.3034634753850339e-03 -1.7424262160430933e-04
867 2.9709903037899391e-03 -6.7561222495397220e-03 3.2575090628287379e-03
869 2.6466133948141908e-03 -9.0885319180226288e-03 3.0070226422475683e-03
868 -3.7744524891322189e-03 1.4240685705086409e-02 9.6165506606517692e-03
872 -1.0218496770676739e-03 -1.1751602445080105e-02 -7.4540217936064313e-03
870 -3.0141408309505482e-03 -3.8484701023985129e-03 -4.8320809889617015e-03
871 -6.8857389659095778e-03 -1.6395854087888705e-02 -1.4053254571632702e-02
875 -4.4532802854351898e-03 -1.9320306624374943e-03 1.8679127973848800e-02
879 -1.1159368004603888e-03 5.7688781442362513e-03 2.0354416544878288e-03
881 1.6025567272381368e-02 2.3501151644867268e-04 3.0060098069039551e-03
878 -1.4430273683547776e-02 -5.9931404698707015e-03 -2.4863340203895852e-03
873 2.4462298821562472e-03 9.3811146991904966e-03 2.4343973768834858e-03
874 -1.7276146128972009e-02 2.3168723885309786e-02 -5.2685626476709109e-03
876 8.3774045922308828e-04 3.9391068037899534e-03 3.1485814082287062e-03
880 1.0312155360082322e-02 1.2044079107164072e-02 -4.3878476768694505e-03
263 -3.6209989003578775e-03 6.9390901456130012e-04 -2.1051946664195904e-03
271 -2.2811301519907415e-02 -2.8827668455438400e-03 -1.5716395628794851e-02
264 3.4874472404662796e-03 6.6189073025549744e-03 -3.9511825509698749e-03
270 -3.6978227148709302e-03 -5.6826167411585006e-03 -3.8837526631494166e-04
272 4.1925343695465621e-03 4.9379723527090726e-03 -2.5735352106610937e-03
268 -5.4146854685572440e-03 -2.0020262330005671e-04 -9.7069579010288399e-04
273 -6.9896989976573577e-03 -1.8338934155036587e-03 -2.9108478441198134e-03
587 -2.8775307344563628e-02 3.4063454097763061e-03 -6.4544653068204479e-03
284 -6.8441515659373123e-03 -5.5204480862323501e-04 2.1361943588873712e-02
274 7.3033057621741506e-03 -6.5618879646312271e-04 -7.3101485908951677e-03
275 1.7565042954756693e-02 1.8210030141160433e-02 6.4760853483744772e-03
283 -1.8023230410434733e-02 2.3812416900549940e-02 -1.5165261316566694e-02
282 -3.2622442837809298e-03 -4.0657536533082531e-03 3.9134438142463483e-03
276 2.6089356337863044e-03 -2.5934477436197483e-03 4.0917208269156836e-03
279 2.4006606209353754e-03 5.7137262855304254e-03 -1.8851823425652876e-03
281 -1.7085273954091467e-02 5.9457912622621033e-03 1.6561591870507691e-02
277 1.9520507306245844e-02 -4.4928431795269959e-02 1.7985171108730106e-02
278 -1.3661783267412710e-03 -1.1106784399790086e-02 -5.9405010959297528e-03
225 2.1949806455342306e-04 2.5064840994396195e-03 3.4486963558650499e-03
227 1.5076698890159021e-02 1.1230493474704877e-02 -1.7234890557158995e-02
232 3.4542793252844817e-02 4.5403203937815955e-03 -8.3789519034760118e-03
224 2.9333534001617784e-03 9.7157358458073821e-03 1.9187914158840257e-02
223 1.5488414062862511e-02 1.5613382904431618e-02 -2.4027333236735313e-02
222 2.4545389426664228e-03 7.3546175826735734e-03 -3.0787183272705304e-03
220 -1.0553670501981771e-02 -7.3182686031632773e-03 -1.4596912579272833e-02
218 -1.7026338712108689e-03 2.3543471211219906e-03 -6.7323504357193484e-03
235 2.3394455710156964e-03 -1.1544550649507455e-03 -8.6824830087139145e-03
200 -2.1363543701268610e-03 -3.2599228482853302e-03 2.9707848534745998e-03
210 5.3888337970963811e-03 -2.6323105985862735e-03 2.6798430558504578e-03
211 -2.2444739579486005e-03 3.3782329459629231e-03 7.7123159073517642e-04
214 3.0054193031282105e-02 8.4818149874040377e-03 -7.3443451808784220e-03
213 -3.9988049113859232e-03 -9.0825917053623782e-04 2.7970234127975544e-03
215 -5.8133320846704903e-04 1.1255301150771167e-03 -6.4276071183523922e-03
584 1.1408940471918077e-02 -1.4815733705579480e-02 -2.0451447620302068e-02
236 -8.6482266553907505e-03 -1.3592517532750321e-02 -9.6806827563481416e-03
212 5.3123343958980584e-03 -6.7665577215547364e-04 6.0143125207841588e-03
585 -1.1089215793982131e-03 -1.8239475145782945e-03 -5.2404714039980987e-04
577 4.4338005850427763e-03 -1.4578247303154105e-02 -1.1069609039629376e-02
576 -5.7421110669231652e-03 -5.5795198076268367e-03 2.4905269174213011e-03
578 6.5232923182865273e-03 -1.4071588317275398e-02 1.5439047574142788e-02
579 1.5774436463734866e-03 -4.5831373613189428e-03 -1.2810823379886989e-03
582 -3.6317431284918827e-03 -4.4749959932839726e-04 -2.4767462653377493e-03
217 -3.4730898803002567e-03 5.7178588117847134e-03 -1.0264918695891901e-02
588 -1.0313087031711108e-03 4.3424303703277082e-03 2.5306234624225727e-04
221 -9.6417895525608543e-03 -2.2868805890154005e-02 2.4716090266342756e-03
219 3.1887237085092288e-04 2.5154260147907948e-03 -7.8676236058419589e-03
216 -6.1127180906033812e-03 1.1322578455137866e-02 -1.5240536842297280e-02
581 1.2383551237893231e-02 -6.9631722685082513e-03 1.7760677441546403e-02
280 2.8939826172079798e-03 2.8673679457294002e-03 2.0658457277718464e-03
287 -7.7616859357025093e-03 -5.5159147440293887e-03 1.0260218613806117e-02
246 1.8226415895219897e-02 9.4860321906443893e-03 5.7977005865752860e-03
574 -1.5360408869607659e-02 -8.1027804043385856e-03 4.9859910655497448e-03
568 4.9758581488833888e-03 1.0485375639001039e-02 -6.5005576951455719e-03
575 -2.0824705445586150e-02 -1.7931064421941829e-02 1.1599541583080797e-02
573 3.0881131437211305e-05 1.2146367308892179e-03 -2.4657424605219434e-03
583 -1.4181977062051106e-02 -2.2968342801241590e-02 -1.2437260571775325e-02
571 6.6851089463312776e-03 -8.1472030619622032e-03 8.1948261321422241e-04
570 4.1479724904379071e-03 -4.2378043192834516e-03 3.3439907046444312e-03
567 -1.3238305076473028e-02 -1.3721680509139356e-03 6.5099305582066846e-03
569 -1.2520191923967420e-02 5.5726095069736651e-05 5.5750323769586012e-03
580 7.5019521207579445e-03 1.4753199431701601e-02 -5.8478608570105492e-03
749 1.2225056794087343e-02 -1.1391281599037759e-03 8.4482026133621095e-03
230 1.2027609619839650e-02 4.9490619767531066e-03 -9.3981499450849354e-03
228 4.5063769407164894e-03 4.7787175122617851e-03 1.6428993962505061e-03
229 8.2655950050851343e-03 1.3725163922434324e-02 -3.7829871406329495e-03
231 5.4674764392653140e-03 4.8105161602951920e-03 2.2829371529663758e-03
111 1.2391437911579888e-02 6.2373266247763961e-03 1.0604264470421190e-02
155 -2.0140153734761200e-04 1.0243597896360139e-02 -9.4596274698809037e-04
156 1.0608465909695813e-04 7.7118597078979978e-03 -2.8509098939738449e-04
160 1.5775221404670720e-02 5.9455952621452045e-03 -1.3191685500023238e-02
153 5.9018108711031986e-03 2.7207130495398361e-02 -1.5697406736926763e-02
233 2.2271750395432030e-03 -1.1774743432899554e-02 -6.3633914489345227e-03
158 -2.7495568497622157e-03 -1.8095698078926356e-03 1.0255975336013474e-03
234 1.9296074694415327e-02 1.2380788520182290e-02 -2.6319592542582849e-02
144 1.5323326421333550e-02 2.1187554057954180e-03 6.7424114820844351e-03
226 2.3812141580159703e-02 1.3570902916458892e-02 8.7659299665438176e-03
1094 4.4827131446768835e-03 5.5831983547922539e-03 -1.2353433449569186e-02
1106 -5.2902064360419050e-04 -9.0341644640044624e-03 -5.4742287498513904e-03
1111 5.5530929608834335e-03 -6.7633056265633358e-03 -5.6845925449034961e-03
1104 -1.0395161868837846e-03 -3.0076411866300228e-03 -6.9020172636289874e-03
1116 5.5290070855191576e-03 1.7618386134102143e-03 -2.0359698825295545e-03
1113 1.6186013735836340e-03 -4.7788464162895801e-04 -6.5363240144365366e-03
1115 3.0293298694563961e-03 -1.1962252884708548e-03 -1.6092433492811741e-03
1114 -6.4950892809453988e-03 2.6084032769163692e-03 2.2586761493206542e-03
1105 -1.5145050509093738e-02 -8.9448179389120652e-03 -9.3874318258249847e-03
1110 8.0544199450512388e-03 2.1081127592796284e-03 -8.3645069111472278e-03
1107 -5.6412573019035588e-03 -2.1718709115553232e-03 -6.6575900247355380e-03
1112 -8.7728053685048515e-03 -1.8036179739511011e-02 4.7598175957027549e-03
1109 -5.1386356838649984e-03 -1.0670224203783801e-04 -6.5251760067926764e-03
1108 -5.9478141255408339e-03 1.1161808025335888e-02 -6.6633132921866123e-03
1092 3.3685652760017683e-04 -3.4998392956183651e-03 2.4582362162195929e-03
1095 2.7684541240863610e-03 -3.3398858548018464e-03 -6.8964846018792145e-03
157 1.2047750636829559e-02 -1.1806849554541182e-02 -2.0342535232829535e-02
1096 2.0337148832051005e-03 -9.0373777611530287e-03 -3.9602647014547413e-03
563 -2.0789561117623774e-03 -1.3179318005784146e-03 -1.2767743636826964e-03
572 1.7088286351066372e-02 6.3770576230377067e-03 -6.1749326777614409e-03
565 -6.6793175992130470e-03 -2.7249826600070407e-03 -2.4716930263669512e-03
564 7.2914370019960479e-03 1.7651605030353109e-03 -5.5130654857688532e-03
566 3.5252425037632876e-03 4.7179590615090271e-02 -2.1015877638874609e-03
121 3.7243397660212158e-03 -7.7571828738351280e-03 -5.9492797653400206e-03
123 1.3334043031475470e-02 5.0630469375362490e-03 2.6137546294384931e-02
122 -1.3373728653676089e-02 1.6365462561333036e-02 -1.5616160995419416e-02
120 -3.1387592299931362e-04 5.9898713179660406e-03 2.3081891141844973e-03
118 -1.9939821533926167e-02 -1.2446606562586740e-02 -5.7739259090226151e-03
117 6.9804336139139649e-04 -3.8420661191125530e-03 -2.1159671891041365e-05
119 -2.0824192248432773e-02 -1.6337020607857140e-02 -1.8197970524971793e-03
128 8.3336095474904111e-03 -1.2115359379459851e-03 3.8455381744842078e-03
154 -4.7924760319306850e-03 1.5689552205604834e-02 -5.9882433058445225e-04
748 2.7361540559822572e-03 -4.1340630237421561e-03 3.5764976763167301e-03
116 2.5852901386600054e-03 -8.5735481664903149e-03 -1.0816782475726377e-02
115 1.8589987751697712e-03 5.0430412961708726e-04 -2.0102701669693014e-03
687 -2.2715914839466335e-03 1.0895035011786343e-03 2.7840122794453902e-03
107 4.6373096912686084e-03 -2.1736935693298931e-03 5.3642101185801486e-03
101 1.9421907714724158e-03 -5.4849272162276466e-03 -9.9983535106203049e-04
104 3.4590072343793112e-03 4.0075544394047600e-03 -1.3524004245609341e-02
109 3.0193578709165100e-04 5.8022166547243058e-03 -2.3156314687839967e-03
150 1.3895288195297943e-02 2.1286727784318549e-02 1.5306797887084398e-03
113 1.0006279201374899e-02 1.2577224938913925e-02 -9.4272203922934460e-03
102 2.0775720414218535e-03 4.5036123536556453e-03 -2.9827447930046679e-03
138 -1.2249930628613467e-03 -9.2898574056891874e-03 2.2705864073332232e-02
112 2.0398939532248993e-03 5.4473180478129719e-03 1.3863467836618759e-03
137 9.3346250206757255e-04 3.4338512041595490e-03 -2.9214839024430399e-03
127 1.2671499391774135e-03 1.5711962563530997e-03 -2.2946064688237800e-03
124 -1.3814094483400325e-04 -4.2704899601470310e-03 -1.8201080401504222e-03
126 -5.1899681941366673e-03 1.3786817819170216e-02 -1.4159062008300355e-02
114 -1.8246673273983490e-02 -1.1140729184635352e-02 -3.2460213055042399e-03
141 2.4749010804358599e-02 2.9316286015105442e-02 3.9418867457471515e-02
140 -2.9738389587150656e-03 3.6193804603761662e-03 6.2465509465924504e-05
139 2.2022086162098525e-02 -1.4116682769769908e-02 1.8918435259115639e-02
146 2.2872871209975987e-02 2.5095740158753662e-03 4.9092594062159775e-03
149 -1.4019905255689892e-03 3.7540271689559378e-03 5.2025468160805952e-03
142 5.4888947755270204e-03 -9.3260154826363805e-03 -2.4053584515871568e-03
125 -6.3904866653094472e-03 1.0005170742323958e-02 8.3380125856550510e-03
152 -7.2300632651060414e-04 -4.6475375835276587e-03 3.7714768877652296e-03
145 1.7059060570081093e-03 -2.4647096322688647e-03 3.3406088065239337e-03
129 1.7453988632826298e-02 1.7416947832981276e-02 -5.9190692079145917e-03
1082 -1.4911422183484279e-03 1.5081029786425202e-03 6.3673569791592420e-04
151 2.0608756463671245e-03 2.4560350220176639e-02 2.3086631126764514e-03
688 2.3665384976556021e-03 1.0521740716795695e-03 4.1011915050724835e-03
698 -2.9221227818712375e-03 -1.1128875199239595e-02 2.2849377244826760e-02
689 1.3978629613860367e-03 -4.3333186458230956e-03 -4.7227954123361341e-03
1098 2.3107418514305895e-03 -1.4283398015799566e-02 2.7860447580217863e-02
1099 -2.7829666480812330e-02 -2.2899510818001989e-04 3.7818395776397576e-03
1097 -1.5367287714654584e-03 -8.1100439069493515e-03 -1.0554292058267397e-04
1101 6.4721247117297785e-03 2.1967971301486026e-02 2.9548610875359333e-02
143 -4.9559716159619134e-03 -6.7885508208354629e-03 -1.6769342547887003e-02
1102 3.6191871258665874e-03 -2.5555760717718820e-04 1.3040137904526130e-02
1100 -7.4348387488441109e-04 3.8895183422627492e-03 2.0377157878141389e-03
726 -1.6930707448843975e-03 1.3259795788315820e-02 3.1646025358918746e-03
692 -4.2835900807638543e-03 2.5108808029126635e-03 -7.6643809481785393e-03
727 -9.7537473061792904e-03 -7.7066783603393493e-03 -3.4282753487491685e-02
1103 -3.0692186420644375e-04 -1.8934364239234180e-02 1.0141737080783604e-03
725 -4.8680535485027725e-03 9.9802596364433772e-03 5.8481420020487767e-03
728 5.6324578925817685e-03 5.7114617643208125e-03 5.5614893753866445e-04
737 -7.6946891517675241e-03 -7.5998970689457749e-03 4.4642145046191288e-03
738 1.6689791965585728e-02 -1.2230668248839309e-02 1.4058405569286189e-02
134 2.4757785633675252e-02 -4.9375721382783084e-03 9.4429759729217182e-03
161 -1.1441479342658991e-03 8.0682035606183793e-03 -8.4193532221439995e-04
815 8.1158107316084884e-03 1.1122607803637847e-02 -3.2430824365134309e-02
1121 -4.8426413273272885e-03 -8.2940616285797301e-03 1.0973921776669154e-02
1129 -4.7401561920560305e-03 3.3162250399321686e-03 6.0742765038424703e-03
1130 6.7398014688696236e-04 -9.8671758496335464e-03 5.5786472233069406e-03
1120 2.3367114152309009e-03 -1.7831038684020886e-03 -3.8722466441303786e-03
1132 -5.4190507669894137e-03 3.5190140448510777e-03 7.3548430926240714e-03
1134 -9.1045152889946742e-03 -1.0087692846253929e-02 -9.6795925925861701e-03
1128 -9.2830597608938251e-03 -2.6913267274082451e-03 -3.8385871857933703e-03
1135 -4.6888698388727933e-03 9.8037594230580252e-04 1.0447882352371610e-04
1133 -7.0901626200034441e-03 -9.0759239576423140e-03 2.1979104504998053e-02
1136 -3.0528372301635962e-03 -1.1370757462853751e-02 4.1825442227998643e-03
1127 -2.4916715958902334e-03 -2.0517558417047022e-03 -2.9850454169265423e-03
1117 5.3278545143061679e-03 3.7690877816987304e-03 1.4549608616066866e-02
1119 -1.1351029707280887e-02 1.4179817764053873e-03 -3.8733181424382068e-03
1122 4.5596246988126006e-03 -4.6438232344437188e-03 6.4446918830256988e-04
1125 2.6495029618228906e-03 6.3539368261741295e-04 1.0770310560196091e-03
1126 -6.8927654473887124e-03 -4.9204512608458945e-03 9.7421822777600166e-03
1124 -2.3114020555460978e-02 -2.3201662576457491e-02 6.1415586739168668e-03
1118 2.3812090647706480e-04 -2.7913574919386442e-02 -1.1638724513202624e-02
1123 -1.5451635184336955e-02 -7.9891853180847159e-03 -9.2917397609950064e-04
816 7.9886745453908311e-04 1.3449672365055873e-03 3.6179919541156368e-03
811 -7.8882499129115608e-04 1.0482234558940148e-02 -7.0960207059386389e-03
818 -3.8200858037606405e-03 -1.5013304971786437e-03 7.5550172618788691e-03
159 -1.2408018257683980e-03 8.6084419864546208e-03 -2.8069440583615031e-03
746 2.6139767771252527e-03 5.3104414492223095e-03 -7.2886718592835454e-04
94 -7.2837869898515991e-04 8.9034059960497805e-03 4.3601884412654895e-03
944 -8.7486224417732787e-03 1.3511225736106292e-02 7.7002401888265114e-03
586 8.9649444777800029e-04 2.1752945598442325e-03 -1.2187377442336746e-03
88 2.4437134563373243e-02 -8.7321250805539128e-03 5.8991309556598696e-03
86 9.1485359338606808e-03 2.9720611571057499e-05 9.7733557627585361e-04
83 2.0304672835167905e-03 -1.3551201811650656e-03 -2.5465378280212334e-03
82 2.4145740413493513e-02 -1.4062533488377087e-02 2.2361139898395811e-02
80 6.9182443850474419e-04 -9.0212235115441301e-03 8.3434485686293691e-03
77 1.6961126914770627e-03 -5.3836090891135502e-04 5.3517156657797180e-04
87 -8.2326448727305691e-03 1.3640213499794950e-02 1.2255304583869879e-02
81 1.8464916388464580e-03 -6.1116517170103904e-03 8.7461917855855293e-03
830 3.0557805360610295e-02 6.4053615070331854e-03 -1.6458748572649704e-02
76 3.0123775323160192e-02 -2.5704652691657091e-02 -2.2282664639951179e-02
74 -4.6788600942977224e-03 2.2806519245514175e-03 2.2767645710080357e-03
73 -1.8113495738237100e-03 -1.3967709406056527e-03 8.1383879429851563e-04
79 -2.7346728032955448e-02 -1.8756300024242986e-02 -6.3872105080470280e-03
147 -8.1095276357828310e-03 -1.1296048323818331e-02 -1.4403516524454390e-02
67 -5.3909555897072676e-04 -4.3789397037848812e-03 3.0009295492598263e-03
110 2.9623561544698366e-02 -8.4853465844951792e-03 -4.5705130926197591e-03
71 -3.1535083307269443e-03 1.9615456436470997e-04 -2.0024736403214034e-03
68 -3.2442854079767396e-03 -2.0432175149339427e-03 1.0166263548727144e-02
75 5.0555496042240522e-03 -2.7594910921634880e-03 1.4745905006775071e-03
130 -3.5869011423452456e-04 1.3673051537402053e-03 -4.8624235832666974e-03
693 -1.7331103740572070e-03 6.2750810912342992e-05 -2.4477487308909801e-03
750 -2.2454230094592562e-03 4.5924665636587810e-03 -2.0139719734861843e-03
694 -2.7509660927162154e-03 3.0771624090605749e-03 -2.0508432107585492e-03
751 1.0642908574970661e-02 4.9228070397486440e-04 3.7522324214933687e-03
752 5.4428485372035942e-03 -1.2040943222320786e-03 3.8377510158986270e-03
696 1.0664408300241611e-02 -6.5105751089137730e-04 4.9351539643327797e-03
691 7.3910626285617618e-04 -5.9584900872829843e-04 -2.2764119818700643e-03
132 1.3665382415402622e-02 -2.7951909008518201e-02 4.6720354533610750e-03
135 8.5887660709007174e-04 1.3663308073698040e-02 4.1730534645033485e-03
808 1.8244304609232227e-02 -1.6987755867372650e-02 8.3770761638402979e-04
723 -1.3517601893241717e-02 -2.2744913836728442e-02 5.4864015222403820e-02
711 1.2404788513362488e-02 1.1692716814189406e-02 -4.0005463243369937e-03
822 2.8572873444079102e-03 2.7115170436181391e-03 4.9534849332825539e-03
877 1.1490794069769935e-02 -8.2070688022133891e-03 -8.7100221712534023e-04
739 -1.8546657628470353e-02 -7.3376189162642292e-03 -1.2264805460439764e-03
720 1.2499790321540269e-02 -1.8106242156283002e-02 1.5896985985643253e-02
695 -5.3385399879124704e-03 -2.1901225473696095e-04 2.6641544054188830e-05
713 2.7778381077076846e-02 8.7327119732675471e-03 1.9026435218130862e-02
709 1.6459313640188107e-04 2.2909640370690947e-03 -2.1213684754424866e-02
702 1.3158037789217307e-02 -3.3363642310677310e-03 1.1996595983104017e-03
708 1.3507021355838224e-03 6.1036277915210246e-04 -2.2963500092822741e-03
714 -9.5941972924251159e-03 -4.7528236099745706e-03 2.0349844136534050e-02
712 -3.4121122997532540e-03 -2.3315760634406444e-03 3.8407388963254972e-04
700 2.4727925154994983e-03 -1.2612050998747635e-03 8.3393893628781702e-04
703 -7.4652874408675759e-04 -3.5028334673983690e-03 -1.5329537618261567e-03
705 -6.3087329988532996e-03 6.6787889790474366e-03 1.6820531460625377e-03
707 2.6632392709120066e-02 3.5110814067271542e-03 5.1419440382049000e-03
701 1.0811614378362911e-02 -1.0242991488108790e-03 -2.2571216349876442e-02
717 -2.2031820880241047e-02 -9.7155696723867542e-03 -5.7282977262189784e-03
690 1.2027768630318077e-03 -1.1576714588410043e-03 -2.9133022661145076e-03
697 2.1324252682117665e-03 -3.5965381218686994e-03 -1.3762439247927159e-04
704 3.2565261295701778e-04 1.0655839059137234e-02 -1.7115459626251004e-03
699 -2.4338364637541483e-02 4.1420596417746501e-02 -3.1627228111378680e-03
706 -5.5648701822203816e-03 5.2609143194379731e-05 -3.9996361499756213e-03
715 7.8934111158369159e-03 4.9810730201456919e-04 2.9673680383132360e-03
716 3.0629099569180594e-04 9.9466675361057355e-03 3.8580615022378228e-03
820 3.6135070607745982e-03 -8.3712941187866902e-03 2.8764592209388790e-02
1139 -1.7227425686482657e-02 1.7089593588180296e-02 8.8169065986012218e-03
1140 7.4427518462054088e-03 6.2213083708027115e-03 1.3414528565774493e-02
1141 -1.5513530800779740e-02 7.2103412669686662e-03 -7.4488376126839841e-03
1138 -5.9761620375290980e-03 -3.1873198269555978e-03 -4.8017416605605437e-04
747 2.3394409624735477e-02 1.6589999629895120e-02 -8.6854219831119187e-03
710 6.6960046598253328e-04 2.0413723725939878e-03 -5.1574196582817042e-03
814 -8.1873598040727632e-03 1.1588523897541114e-02 1.5311358090367177e-03
863 1.3579685181874523e-02 -2.2424924261276701e-03 -1.1209317274353296e-03
859 2.2526941500397357e-02 -6.7289066854543120e-03 1.1466753049977686e-03
84 -1.1828651576037673e-02 -9.1627783090990345e-03 1.4120688336322660e-02
856 -2.5265765481589961e-03 2.2765218163026471e-03 -5.8513531390940255e-03
827 1.4854755922783463e-02 1.2625942969213063e-02 7.9196727972745268e-03
817 9.8566963399584779e-03 3.8565800118664966e-03 2.8637641225874699e-02
793 -3.7777433000439624e-03 1.5896823382942511e-03 -2.3956284224930361e-03
794 -3.4999157664666082e-03 -4.8053771009019322e-03 -1.0130130126165253e-03
78 3.2797643157246432e-02 -8.6889059294007944e-03 1.4872038668078956e-02
797 -3.8679230324531852e-03 -2.4866177773867565e-03 -2.8791659089920322e-03
795 -1.8407410823448659e-03 -2.6387859690781921e-03 2.0970566493077334e-03
730 5.6411453911244152e-03 -5.6824023443524923e-03 -8.5725330760698590e-03
131 -8.3335510322586764e-03 1.4755438468757882e-03 9.7270697130245160e-04
819 -2.7559739358639056e-03 -2.6684379579802234e-03 3.2763616730304961e-03
788 -1.7386452414805555e-04 -1.4882948871727112e-03 1.5461759637313012e-04
731 -6.4004139982751680e-03 7.5633144344723043e-03 4.5466601709534676e-03
798 4.3466353989134177e-03 2.9609963522927987e-03 -7.0084618222411783e-04
800 1.0178886392159598e-02 -1.8733388541190731e-02 -1.0840205800519592e-02
802 6.1888519774687368e-04 -2.0823377294128025e-02 8.1256327671721425e-03
721 -1.5673370609839941e-03 -2.2803165867331734e-03 9.3208452841440099e-03
821 -1.1826608916190456e-02 1.6753997563847104e-02 1.4500739166140539e-02
729 -2.7707657417080029e-03 1.2239513340392140e-02 8.6760048113056279e-03
801 1.9480500570163205e-03 -1.0376816344863265e-03 -1.5067982583991286e-03
810 -1.9564010964809343e-03 3.8680913314987392e-03 2.0659769872711760e-03
722 1.6788473655251015e-02 -8.3271451001347332e-03 -7.7104135555443277e-03
813 3.3832760353287128e-03 -6.9366647006623081e-03 -6.0458920624586387e-03
724 -4.1113338139098943e-03 -7.2295428062301940e-03 5.9896334371043122e-03
789 4.3269888404394155e-03 6.3089780479005410e-03 6.7141087895251595e-03
790 -1.9483759281283216e-03 -4.9055332706573543e-03 1.5017422018564566e-03
785 -7.5675841381705054e-05 1.3033616213815346e-03 -2.1419370215127092e-03
756 8.4103461541982418e-03 -3.2437887650827169e-03 -3.9562743544687435e-03
787 -2.1933636577925997e-03 -1.7141719906529737e-03 -8.5881995460725439e-04
786 4.9808187577691837e-04 -8.7227420114538816e-03 8.4315637594752392e-03
755 3.0200766120340918e-03 6.1088355114951561e-03 -1.2289750503464551e-03
148 1.2278629172681134e-02 -7.6445393430053833e-03 -7.7172583671244891e-03
133 -6.5650731146140806e-03 2.6384348295203973e-04 2.7670789206236885e-03
719 -3.3453969842252712e-02 2.3932963881584075e-02 -8.0750435676776432e-04
734 -2.9424341509579079e-03 1.0200938171708718e-02 1.7334441767059956e-02
718 6.0763959907546696e-04 6.1321824955530551e-03 1.7191817915091342e-03
136 -2.1825497631549610e-02 2.5153732853650256e-02 -5.6250266915624228e-03
829 4.4041175637117751e-03 2.9451111860708170e-03 -1.4504979712731332e-02
754 -3.6276388155170492e-03 1.1800073466810340e-03 9.9008394324911261e-03
784 -3.9675306233659495e-02 -1.2427759242630305e-02 -3.3233646986186027e-03
804 7.3871662627955905e-03 1.1199014198477688e-02 -4.2243057377277403e-03
770 2.9269811985900250e-02 -4.2861403518127872e-03 -1.0376416960202618e-03
777 2.0974790434985152e-02 1.7069369371429190e-02 -7.1676012501642157e-04
831 4.8575577464680525e-03 -5.4196357230015578e-03 -1.6186189934769884e-03
764 -1.2622780823082706e-02 -5.3378519166104102e-03 -4.4966320773157098e-03
840 -1.6046574234971456e-02 1.1202769264685946e-02 -9.5133468497706451e-03
832 -1.0712665013109766e-02 1.4996452712410626e-02 -2.6864251304583916e-02
833 -1.5925319118809327e-02 1.1181117223094186e-02 1.7704862568772607e-02
758 -1.1722321003720270e-02 2.5087448372106409e-03 -2.9592888021217575e-03
845 -1.9751653984869007e-02 1.2172658803094613e-02 1.5973504185749011e-03
846 1.0112126590020372e-02 -3.2316957240985524e-02 -9.0334707533378349e-03
847 -1.9786525445718496e-02 -1.1918331848334809e-02 1.0743691998607394e-02
844 7.2468189660265282e-04 -2.4271125519505152e-03 -8.1773515682638642e-03
838 -3.5813407314263094e-03 -7.7182408191744294e-04 -1.3488570963307231e-03
772 7.2042536816827197e-03 -1.6868696896499063e-03 -1.6823674022084752e-03
735 1.6576247553322697e-03 1.7925881692886000e-03 -1.2939598587248372e-02
736 -3.7543333228374676e-03 -7.9963976287026409e-03 4.6508100511987267e-03
733 1.4753752736958200e-02 3.4006095823089742e-03 -6.4750207577463159e-03
834 7.4151608667709212e-03 -5.0543932832260499e-04 -1.3628749179712936e-02
741 -2.1164962058473118e-02 1.1127487690293821e-02 -1.4564754141338345e-02
768 -4.4228033449239456e-03 -6.6410681953074134e-03 -8.1233341592624516e-03
837 -1.0978319304850130e-02 1.1804635680494797e-02 -4.4731894792153191e-03
836 -1.6292676076275520e-02 8.7489133155437254e-03 -3.0585539359965787e-03
835 -1.2418878866527153e-03 -9.3467186921880163e-04 -5.6959203862557719e-04
842 1.2302268401515289e-03 -1.4784596831863006e-03 -2.2614175457169216e-02
841 1.1192229546991756e-03 -4.8834964040754313e-03 -2.3963180831764147e-04
843 6.2580513279641379e-05 -1.2352647288780490e-02 -1.4140864399692420e-03
762 1.0992816706657501e-03 4.3941434756894137e-03 6.1477844281815717e-03
760 4.2378713259327164e-03 7.6743478047040046e-03 4.8198630946559157e-03
761 -2.8108959921628100e-02 -1.9542872803472188e-03 -2.9336098835650384e-02
765 -2.1490180462174140e-02 -4.5611776673737574e-03 8.7090577115647803e-03
763 -7.2626240963658310e-04 -3.2633816580697763e-03 4.3544746767372891e-03
806 2.6919818595197769e-03 4.2282328512287344e-03 -3.8815684980002645e-03
771 -1.9208524988453327e-02 4.9630741922902424e-03 1.1466770327474602e-02
825 1.1212016645850921e-02 8.1193153983409230e-03 -2.5655298904174364e-03
839 -5.4617422075643636e-03 -2.8731956725137422e-02 -8.8576451334320995e-03
766 -3.9035932492959577e-04 -3.7750010229482471e-03 -9.9930352019012795e-04
769 -1.9085068122673863e-03 -4.5983535941839567e-03 1.2000911497272622e-02
759 3.0426243108563743e-03 -4.7705134714264227e-03 -2.4458344501099819e-03
732 1.4539007695110309e-02 2.6872312910652765e-03 -1.8780728492232293e-02
799 -2.3056190077533019e-02 -2.9727966495855601e-02 8.3937953045289376e-03
774 -1.8583086966087816e-02 -5.1522754703820653e-03 -1.9225936993688752e-02
775 -7.5695972709767718e-04 4.8759190056136123e-03 -1.7040384147484437e-03
757 -7.6077787047418256e-04 3.7726705632950366e-03 -4.6854278068468262e-03
776 1.8735496407325115e-03 -9.1196855925647254e-03 -1.9802940089700429e-02
767 -2.5997389704842142e-02 -9.1701337751974605e-03 1.5991808695669085e-03
744 -1.0954607391762263e-02 1.8984051307450719e-02 8.9938236610961307e-03
780 -3.1224849864245419e-03 -8.6164000704605920e-03 -4.8342473443810027e-03
805 6.3504930934736616e-03 4.0278597227059046e-03 1.8613464560931287e-02
828 1.0674795091074405e-03 -3.7603358343671874e-03 3.2164418023700519e-03
781 3.1919675309386750e-03 -2.2755508941551134e-04 5.9545558768216563e-03
753 -2.7297737994305313e-03 -3.0949057820395961e-03 1.9313931752374487e-03
778 7.8613120870344810e-04 -1.2021285069338105e-03 8.5186847664271113e-03
782 -6.9971100154183393e-03 -3.0686954801634821e-03 5.3087282081178892e-04
783 5.0474276753053483e-03 4.2062236741697992e-03 5.8848925015326852e-03
826 -5.5248276160866283e-03 4.2477205837963029e-03 -9.1960431754980272e-04
796 -2.8989023290592136e-02 3.3084426686156035e-02 1.4955317000959020e-02
823 -5.5731757867242887e-03 -5.3858734386082715e-03 2.7309808478887085e-03
773 -2.1124812687737266e-03 -1.0569599122112475e-02 -2.2519930203254209e-03
807 1.8838639534757475e-02 1.1319899186373180e-02 7.6131449760773176e-03
779 2.0777012902916145e-03 -1.7678975888567670e-03 9.2351960925908735e-03
803 3.9810955050916114e-03 1.6714668400114058e-03 2.7296892280628655e-03
812 1.6509240615931557e-02 5.1597588152569535e-03 -9.3525203840994376e-03
740 2.7177822539561497e-03 -5.8323229567030588e-04 6.8341119014551661e-04
745 -1.1069235940697897e-02 1.9954664855047110e-02 -3.8193005414631051e-03
743 -2.8534732523845343e-03 6.1245964886420569e-03 3.3816262516073114e-03
809 -6.8193276359069131e-03 4.9403197728182810e-03 1.4434981644630062e-02
742 5.1466085196197010e-03 -3.5537873295898794e-03 1.0357540538811503e-02
824 -1.2590566546932516e-02 -5.7157949640743184e-03 2.8318964131026206e-02

Bonds

1 18 427 428
2 18 427 429
3 18 427 430
4 16 424 425
5 16 424 426
6 17 424 427
7 16 421 422
8 16 421 423
9 19 421 424
10 27 368 369
11 27 368 370
12 28 368 371
13 24 362 365
14 26 362 368
15 25 365 367
16 22 364 365
17 21 363 364
18 11 363 394
19 12 406 407
20 12 406 408
21 13 406 409
22 5 395 398
23 6 395 404
24 7 396 398
25 7 396 403
26 8 396 406
27 8 396 431
28 12 431 432
29 12 431 433
30 13 431 434
31 16 411 412
32 16 411 413
33 17 411 414
34 1 393 394
35 2 393 397
36 3 394 395
37 9 397 398
38 10 397 402
39 9 402 403
40 1 399 400
41 2 399 402
42 5 401 403
43 6 401 405
44 3 400 401
45 11 400 457
46 16 418 419
47 16 418 420
48 19 418 421
49 14 409 410
50 15 409 411
51 15 409 418
52 18 414 415
53 18 414 416
54 18 414 417
55 18 193 194
56 18 193 195
57 18 193 196
58 18 1040 1041
59 18 1040 1042
60 18 1040 1043
61 16 1012 1013
62 16 1012 1014
63 17 1012 1015
64 16 1006 1007
65 16 1006 1008
66 19 1006 1009
67 16 1009 1010
68 16 1009 1011
69 19 1009 1012
70 18 1015 1016
71 18 1015 1017
72 18 1015 1018
73 16 377 378
74 16 377 379
75 19 377 380
76 16 380 381
77 16 380 382
78 19 380 383
79 16 383 384
80 16 383 385
81 19 383 386
82 16 386 387
83 16 386 388
84 17 386 389
85 18 316 317
86 18 316 318
87 18 316 319
88 16 313 314
89 16 313 315
90 17 313 316
91 16 371 372
92 16 371 373
93 19 371 374
94 21 359 360
95 22 360 361
96 23 360 364
97 3 302 303
98 11 302 359
99 5 303 305
100 6 303 307
101 24 361 362
102 25 361 366
103 16 374 375
104 16 374 376
105 19 374 377
106 14 336 337
107 15 336 338
108 15 336 345
109 18 389 390
110 18 389 391
111 18 389 392
112 18 341 342
113 18 341 343
114 18 341 344
115 14 434 435
116 15 434 436
117 15 434 443
118 16 443 444
119 16 443 445
120 19 443 446
121 16 446 447
122 16 446 448
123 19 446 449
124 16 449 450
125 16 449 451
126 17 449 452
127 18 452 453
128 18 452 454
129 18 452 455
130 16 345 346
131 16 345 347
132 19 345 348
133 16 436 437
134 16 436 438
135 17 436 439
136 18 439 440
137 18 439 441
138 18 439 442
139 20 358 359
140 20 358 363
141 1 301 302
142 2 301 304
143 9 304 305
144 9 299 300
145 10 299 304
146 20 456 457
147 20 456 461
148 21 457 458
149 24 459 460
150 25 459 464
151 22 458 459
152 23 458 462
153 22 462 463
154 21 461 462
155 11 461 492
156 24 460 463
157 26 460 466
158 25 463 465
159 27 466 467
160 27 466 468
161 28 466 469
162 16 469 470
163 16 469 471
164 19 469 472
165 16 472 473
166 16 472 474
167 19 472 475
168 16 475 476
169 16 475 477
170 19 475 478
171 18 623 624
172 18 623 625
173 18 623 626
174 16 1161 1162
175 16 1161 1163
176 19 1161 1164
177 16 1164 1165
178 16 1164 1166
179 19 1164 1167
180 1 491 492
181 2 491 495
182 9 495 496
183 10 495 500
184 3 492 493
185 16 1167 1168
186 16 1167 1169
187 19 1167 1170
188 18 1173 1174
189 18 1173 1175
190 18 1173 1176
191 16 1170 1171
192 16 1170 1172
193 17 1170 1173
194 16 509 510
195 16 509 511
196 17 509 512
197 14 507 508
198 15 507 509
199 15 507 516
200 16 519 520
201 16 519 521
202 19 519 522
203 5 493 496
204 6 493 502
205 16 516 517
206 16 516 518
207 19 516 519
208 18 525 526
209 18 525 527
210 18 525 528
211 16 522 523
212 16 522 524
213 17 522 525
214 16 974 975
215 16 974 976
216 17 974 977
217 16 190 191
218 16 190 192
219 17 190 193
220 16 187 188
221 16 187 189
222 19 187 190
223 16 968 969
224 16 968 970
225 19 968 971
226 16 971 972
227 16 971 973
228 19 971 974
229 18 977 978
230 18 977 979
231 18 977 980
232 16 184 185
233 16 184 186
234 19 184 187
235 16 181 182
236 16 181 183
237 19 181 184
238 16 1037 1038
239 16 1037 1039
240 17 1037 1040
241 16 1034 1035
242 16 1034 1036
243 19 1034 1037
244 16 1031 1032
245 16 1031 1033
246 19 1031 1034
247 16 178 179
248 16 178 180
249 19 178 181
250 16 175 176
251 16 175 177
252 19 175 178
253 27 172 173
254 27 172 174
255 28 172 175
256 16 620 621
257 16 620 622
258 17 620 623
259 16 617 618
260 16 617 619
261 19 617 620
262 16 614 615
263 16 614 616
264 19 614 617
265 18 610 611
266 18 610 612
267 18 610 613
268 16 607 608
269 16 607 609
270 17 607 610
271 14 605 606
272 15 605 607
273 15 605 614
274 12 602 603
275 12 602 604
276 13 602 605
277 12 627 628
278 12 627 629
279 13 627 630
280 14 630 631
281 15 630 632
282 15 630 639
283 16 1158 1159
284 16 1158 1160
285 19 1158 1161
286 16 1155 1156
287 16 1155 1157
288 19 1155 1158
289 18 635 636
290 18 635 637
291 18 635 638
292 16 632 633
293 16 632 634
294 17 632 635
295 27 1152 1153
296 27 1152 1154
297 28 1152 1155
298 18 512 513
299 18 512 514
300 18 512 515
301 27 956 957
302 27 956 958
303 28 956 959
304 16 965 966
305 16 965 967
306 19 965 968
307 24 950 953
308 26 950 956
309 25 953 955
310 16 962 963
311 16 962 964
312 19 962 965
313 16 959 960
314 16 959 961
315 19 959 962
316 18 929 930
317 18 929 931
318 18 929 932
319 18 1027 1028
320 18 1027 1029
321 18 1027 1030
322 12 994 995
323 12 994 996
324 13 994 997
325 14 1022 1023
326 15 1022 1024
327 15 1022 1031
328 16 1024 1025
329 16 1024 1026
330 17 1024 1027
331 12 1019 1020
332 12 1019 1021
333 13 1019 1022
334 5 983 986
335 6 983 992
336 7 984 986
337 7 984 991
338 8 984 994
339 8 984 1019
340 9 985 986
341 10 985 990
342 9 990 991
343 14 997 998
344 15 997 999
345 15 997 1006
346 16 639 640
347 16 639 641
348 19 639 642
349 18 1002 1003
350 18 1002 1004
351 18 1002 1005
352 5 989 991
353 6 989 993
354 16 999 1000
355 16 999 1001
356 17 999 1002
357 3 988 989
358 11 988 1045
359 16 642 643
360 16 642 644
361 19 642 645
362 16 645 646
363 16 645 647
364 17 645 648
365 18 648 649
366 18 648 650
367 18 648 651
368 18 904 905
369 18 904 906
370 18 904 907
371 16 901 902
372 16 901 903
373 17 901 904
374 14 899 900
375 15 899 901
376 15 899 908
377 12 896 897
378 12 896 898
379 13 896 899
380 16 908 909
381 16 908 910
382 19 908 911
383 16 911 912
384 16 911 913
385 19 911 914
386 24 949 950
387 25 949 954
388 22 952 953
389 7 886 888
390 7 886 893
391 8 886 896
392 8 886 921
393 22 948 949
394 23 948 952
395 21 947 948
396 3 890 891
397 11 890 947
398 1 889 890
399 2 889 892
400 5 891 893
401 6 891 895
402 9 887 888
403 10 887 892
404 9 892 893
405 3 982 983
406 20 946 947
407 20 946 951
408 21 951 952
409 11 951 982
410 1 981 982
411 2 981 985
412 18 47 48
413 18 47 49
414 18 47 50
415 12 39 40
416 12 39 41
417 13 39 42
418 1 987 988
419 2 987 990
420 16 44 45
421 16 44 46
422 17 44 47
423 18 35 36
424 18 35 37
425 18 35 38
426 16 26 27
427 16 26 28
428 19 26 29
429 16 19 20
430 16 19 21
431 17 19 22
432 14 17 18
433 15 17 19
434 15 17 26
435 18 22 23
436 18 22 24
437 18 22 25
438 16 32 33
439 16 32 34
440 17 32 35
441 16 29 30
442 16 29 31
443 19 29 32
444 18 917 918
445 18 917 919
446 18 917 920
447 16 914 915
448 16 914 916
449 17 914 917
450 14 42 43
451 15 42 44
452 15 42 51
453 16 51 52
454 16 51 53
455 19 51 54
456 16 54 55
457 16 54 56
458 19 54 57
459 18 60 61
460 18 60 62
461 18 60 63
462 16 57 58
463 16 57 59
464 17 57 60
465 16 320 321
466 16 320 322
467 19 320 323
468 16 326 327
469 16 326 328
470 17 326 329
471 14 311 312
472 15 311 313
473 15 311 320
474 12 308 309
475 12 308 310
476 13 308 311
477 7 298 300
478 7 298 305
479 8 298 308
480 8 298 333
481 12 333 334
482 12 333 335
483 13 333 336
484 16 338 339
485 16 338 340
486 17 338 341
487 16 323 324
488 16 323 325
489 19 323 326
490 16 351 352
491 16 351 353
492 17 351 354
493 16 348 349
494 16 348 350
495 19 348 351
496 18 354 355
497 18 354 356
498 18 354 357
499 16 481 482
500 16 481 483
501 19 481 484
502 18 487 488
503 18 487 489
504 18 487 490
505 16 484 485
506 16 484 486
507 17 484 487
508 16 478 479
509 16 478 480
510 19 478 481
511 5 297 300
512 6 297 306
513 21 265 266
514 11 265 296
515 20 260 261
516 20 260 265
517 1 295 296
518 2 295 299
519 3 296 297
520 22 266 267
521 18 329 330
522 18 329 331
523 18 329 332
524 21 261 262
525 22 262 263
526 23 262 266
527 25 267 269
528 16 541 542
529 16 541 543
530 19 541 544
531 16 534 535
532 16 534 536
533 17 534 537
534 18 537 538
535 18 537 539
536 18 537 540
537 16 544 545
538 16 544 546
539 19 544 547
540 16 547 548
541 16 547 549
542 17 547 550
543 18 550 551
544 18 550 552
545 18 550 553
546 1 197 198
547 2 197 201
548 18 256 257
549 18 256 258
550 18 256 259
551 1 203 204
552 2 203 206
553 16 250 251
554 16 250 252
555 19 250 253
556 16 253 254
557 16 253 255
558 17 253 256
559 16 247 248
560 16 247 249
561 19 247 250
562 3 204 205
563 11 204 261
564 9 206 207
565 9 201 202
566 10 201 206
567 14 238 239
568 15 238 240
569 15 238 247
570 5 205 207
571 6 205 209
572 16 288 289
573 16 288 290
574 17 288 291
575 18 291 292
576 18 291 293
577 18 291 294
578 1 497 498
579 2 497 500
580 3 498 499
581 11 498 555
582 9 500 501
583 5 499 501
584 6 499 503
585 21 555 556
586 22 556 557
587 23 556 560
588 24 557 558
589 25 557 562
590 16 285 286
591 16 285 287
592 19 285 288
593 16 240 241
594 16 240 242
595 17 240 243
596 18 243 244
597 18 243 245
598 18 243 246
599 12 504 505
600 12 504 506
601 13 504 507
602 7 494 496
603 7 494 501
604 8 494 504
605 8 494 529
606 12 529 530
607 12 529 531
608 13 529 532
609 14 532 533
610 15 532 534
611 15 532 541
612 24 166 169
613 26 166 172
614 24 165 166
615 25 165 170
616 25 169 171
617 3 106 107
618 11 106 163
619 22 164 165
620 23 164 168
621 21 163 164
622 22 168 169
623 21 167 168
624 11 167 198
625 3 198 199
626 20 162 163
627 20 162 167
628 7 592 594
629 7 592 599
630 8 592 602
631 8 592 627
632 9 598 599
633 1 595 596
634 2 595 598
635 9 593 594
636 10 593 598
637 1 589 590
638 2 589 593
639 5 199 202
640 6 199 208
641 20 554 555
642 20 554 559
643 24 1146 1149
644 26 1146 1152
645 24 1145 1146
646 25 1145 1150
647 21 559 560
648 11 559 590
649 22 560 561
650 1 1085 1086
651 2 1085 1088
652 5 591 594
653 6 591 600
654 3 590 591
655 5 1087 1089
656 6 1087 1091
657 3 1086 1087
658 11 1086 1143
659 21 1143 1144
660 22 1144 1145
661 23 1144 1148
662 20 1142 1143
663 20 1142 1147
664 22 1148 1149
665 25 561 563
666 21 1147 1148
667 29 1147 1178
668 24 558 561
669 26 558 564
670 25 1149 1151
671 16 668 669
672 16 668 670
673 19 668 671
674 27 662 663
675 27 662 664
676 28 662 665
677 16 665 666
678 16 665 667
679 19 665 668
680 24 656 659
681 26 656 662
682 24 655 656
683 25 655 660
684 1 105 106
685 2 105 108
686 1 99 100
687 2 99 103
688 3 100 101
689 9 103 104
690 10 103 108
691 9 108 109
692 25 659 661
693 22 658 659
694 5 597 599
695 6 597 601
696 20 1044 1045
697 20 1044 1049
698 21 1045 1046
699 3 596 597
700 11 596 653
701 22 1046 1047
702 23 1046 1050
703 21 1049 1050
704 11 1049 1080
705 1 1079 1080
706 2 1079 1083
707 21 653 654
708 22 1050 1051
709 3 1080 1081
710 22 654 655
711 23 654 658
712 21 657 658
713 11 657 688
714 20 652 653
715 20 652 657
716 5 1081 1084
717 6 1081 1090
718 25 1051 1053
719 9 1083 1084
720 10 1083 1088
721 9 1088 1089
722 18 95 96
723 18 95 97
724 18 95 98
725 16 92 93
726 16 92 94
727 17 92 95
728 16 926 927
729 16 926 928
730 17 926 929
731 18 942 943
732 18 942 944
733 18 942 945
734 16 89 90
735 16 89 91
736 19 89 92
737 16 680 681
738 16 680 682
739 17 680 683
740 16 933 934
741 16 933 935
742 19 933 936
743 16 939 940
744 16 939 941
745 17 939 942
746 14 924 925
747 15 924 926
748 15 924 933
749 16 936 937
750 16 936 938
751 19 936 939
752 12 921 922
753 12 921 923
754 13 921 924
755 18 683 684
756 18 683 685
757 18 683 686
758 7 4 6
759 7 4 11
760 8 4 14
761 8 4 39
762 16 671 672
763 16 671 673
764 19 671 674
765 16 674 675
766 16 674 676
767 19 674 677
768 16 677 678
769 16 677 679
770 19 677 680
771 5 9 11
772 6 9 13
773 21 69 70
774 11 69 100
775 3 8 9
776 11 8 65
777 1 7 8
778 2 7 10
779 22 66 67
780 23 66 70
781 22 70 71
782 21 65 66
783 20 64 65
784 20 64 69
785 12 14 15
786 12 14 16
787 13 14 17
788 24 1047 1048
789 25 1047 1052
790 24 1048 1051
791 26 1048 1054
792 27 1054 1055
793 27 1054 1056
794 28 1054 1057
795 16 1060 1061
796 16 1060 1062
797 19 1060 1063
798 16 1063 1064
799 16 1063 1065
800 19 1063 1066
801 16 1057 1058
802 16 1057 1059
803 19 1057 1060
804 16 1066 1067
805 16 1066 1068
806 19 1066 1069
807 16 864 865
808 16 864 866
809 19 864 867
810 27 858 859
811 27 858 860
812 28 858 861
813 24 852 855
814 26 852 858
815 25 855 857
816 16 861 862
817 16 861 863
818 19 861 864
819 5 885 888
820 6 885 894
821 1 883 884
822 2 883 887
823 24 851 852
824 25 851 856
825 22 854 855
826 3 884 885
827 21 853 854
828 11 853 884
829 20 848 849
830 20 848 853
831 22 850 851
832 23 850 854
833 21 849 850
834 3 792 793
835 11 792 849
836 1 791 792
837 2 791 794
838 9 10 11
839 9 5 6
840 10 5 10
841 1 1 2
842 2 1 5
843 5 3 6
844 6 3 12
845 3 2 3
846 4 2 1177
847 16 1069 1070
848 16 1069 1071
849 19 1069 1072
850 16 1072 1073
851 16 1072 1074
852 17 1072 1075
853 18 1075 1076
854 18 1075 1077
855 18 1075 1078
856 16 867 868
857 16 867 869
858 19 867 870
859 16 870 871
860 16 870 872
861 19 870 873
862 18 879 880
863 18 879 881
864 18 879 882
865 16 873 874
866 16 873 875
867 19 873 876
868 16 876 877
869 16 876 878
870 17 876 879
871 24 263 264
872 25 263 268
873 24 264 267
874 26 264 270
875 27 270 271
876 27 270 272
877 28 270 273
878 16 273 274
879 16 273 275
880 19 273 276
881 16 282 283
882 16 282 284
883 19 282 285
884 16 276 277
885 16 276 278
886 19 276 279
887 16 279 280
888 16 279 281
889 19 279 282
890 16 225 226
891 16 225 227
892 19 225 228
893 16 222 223
894 16 222 224
895 19 222 225
896 18 218 219
897 18 218 220
898 18 218 221
899 12 235 236
900 12 235 237
901 13 235 238
902 7 200 202
903 7 200 207
904 8 200 210
905 8 200 235
906 12 210 211
907 12 210 212
908 13 210 213
909 14 213 214
910 15 213 215
911 15 213 222
912 16 215 216
913 16 215 217
914 17 215 218
915 18 585 586
916 18 585 587
917 18 585 588
918 16 576 577
919 16 576 578
920 19 576 579
921 16 579 580
922 16 579 581
923 19 579 582
924 16 582 583
925 16 582 584
926 17 582 585
927 16 573 574
928 16 573 575
929 19 573 576
930 16 570 571
931 16 570 572
932 19 570 573
933 16 567 568
934 16 567 569
935 19 567 570
936 16 228 229
937 16 228 230
938 17 228 231
939 18 231 232
940 18 231 233
941 18 231 234
942 16 155 156
943 16 155 157
944 17 155 158
945 18 158 159
946 18 158 160
947 18 158 161
948 16 1104 1105
949 16 1104 1106
950 19 1104 1107
951 18 1113 1114
952 18 1113 1115
953 18 1113 1116
954 16 1110 1111
955 16 1110 1112
956 17 1110 1113
957 16 1107 1108
958 16 1107 1109
959 19 1107 1110
960 12 1092 1093
961 12 1092 1094
962 13 1092 1095
963 14 1095 1096
964 15 1095 1097
965 15 1095 1104
966 27 564 565
967 27 564 566
968 28 564 567
969 18 120 121
970 18 120 122
971 18 120 123
972 16 117 118
973 16 117 119
974 17 117 120
975 14 115 116
976 15 115 117
977 15 115 124
978 1 687 688
979 2 687 691
980 5 107 109
981 6 107 111
982 5 101 104
983 6 101 110
984 7 102 104
985 7 102 109
986 8 102 112
987 8 102 137
988 12 112 113
989 12 112 114
990 13 112 115
991 12 137 138
992 12 137 139
993 13 137 140
994 16 127 128
995 16 127 129
996 19 127 130
997 16 124 125
998 16 124 126
999 19 124 127
1000 14 140 141
1001 15 140 142
1002 15 140 149
1003 16 149 150
1004 16 149 151
1005 19 149 152
1006 16 142 143
1007 16 142 144
1008 17 142 145
1009 16 152 153
1010 16 152 154
1011 19 152 155
1012 18 145 146
1013 18 145 147
1014 18 145 148
1015 7 1082 1084
1016 7 1082 1089
1017 8 1082 1092
1018 8 1082 1117
1019 3 688 689
1020 5 689 692
1021 6 689 698
1022 16 1097 1098
1023 16 1097 1099
1024 17 1097 1100
1025 18 1100 1101
1026 18 1100 1102
1027 18 1100 1103
1028 12 725 726
1029 12 725 727
1030 13 725 728
1031 14 728 729
1032 15 728 730
1033 15 728 737
1034 16 737 738
1035 16 737 739
1036 19 737 740
1037 16 1129 1130
1038 16 1129 1131
1039 19 1129 1132
1040 14 1120 1121
1041 15 1120 1122
1042 15 1120 1129
1043 16 1132 1133
1044 16 1132 1134
1045 19 1132 1135
1046 16 1135 1136
1047 16 1135 1137
1048 17 1135 1138
1049 12 1117 1118
1050 12 1117 1119
1051 13 1117 1120
1052 16 1122 1123
1053 16 1122 1124
1054 17 1122 1125
1055 18 1125 1126
1056 18 1125 1127
1057 18 1125 1128
1058 16 816 817
1059 16 816 818
1060 17 816 819
1061 18 746 747
1062 18 746 748
1063 18 746 749
1064 16 86 87
1065 16 86 88
1066 19 86 89
1067 16 83 84
1068 16 83 85
1069 19 83 86
1070 16 80 81
1071 16 80 82
1072 19 80 83
1073 16 77 78
1074 16 77 79
1075 19 77 80
1076 27 74 75
1077 27 74 76
1078 28 74 77
1079 24 67 68
1080 25 67 72
1081 25 71 73
1082 24 68 71
1083 26 68 74
1084 16 130 131
1085 16 130 132
1086 17 130 133
1087 1 693 694
1088 2 693 696
1089 20 750 751
1090 20 750 755
1091 3 694 695
1092 11 694 751
1093 21 751 752
1094 22 752 753
1095 23 752 756
1096 9 696 697
1097 9 691 692
1098 10 691 696
1099 5 695 697
1100 6 695 699
1101 18 708 709
1102 18 708 710
1103 18 708 711
1104 16 712 713
1105 16 712 714
1106 19 712 715
1107 12 700 701
1108 12 700 702
1109 13 700 703
1110 14 703 704
1111 15 703 705
1112 15 703 712
1113 16 705 706
1114 16 705 707
1115 17 705 708
1116 7 690 692
1117 7 690 697
1118 8 690 700
1119 8 690 725
1120 16 715 716
1121 16 715 717
1122 19 715 718
1123 18 1138 1139
1124 18 1138 1140
1125 18 1138 1141
1126 5 793 795
1127 6 793 797
1128 9 794 795
1129 16 730 731
1130 16 730 732
1131 17 730 733
1132 18 819 820
1133 18 819 821
1134 18 819 822
1135 7 788 790
1136 7 788 795
1137 8 788 798
1138 8 788 823
1139 12 798 799
1140 12 798 800
1141 13 798 801
1142 18 721 722
1143 18 721 723
1144 18 721 724
1145 14 801 802
1146 15 801 803
1147 15 801 810
1148 16 810 811
1149 16 810 812
1150 19 810 813
1151 16 813 814
1152 16 813 815
1153 19 813 816
1154 9 789 790
1155 10 789 794
1156 1 785 786
1157 2 785 789
1158 22 756 757
1159 5 787 790
1160 6 787 796
1161 3 786 787
1162 21 755 756
1163 11 755 786
1164 18 133 134
1165 18 133 135
1166 18 133 136
1167 16 718 719
1168 16 718 720
1169 17 718 721
1170 24 754 757
1171 26 754 760
1172 18 831 832
1173 18 831 833
1174 18 831 834
1175 18 844 845
1176 18 844 846
1177 18 844 847
1178 16 838 839
1179 16 838 840
1180 19 838 841
1181 16 772 773
1182 16 772 774
1183 19 772 775
1184 18 733 734
1185 18 733 735
1186 18 733 736
1187 16 835 836
1188 16 835 837
1189 19 835 838
1190 16 841 842
1191 16 841 843
1192 17 841 844
1193 27 760 761
1194 27 760 762
1195 28 760 763
1196 16 763 764
1197 16 763 765
1198 19 763 766
1199 18 806 807
1200 18 806 808
1201 18 806 809
1202 16 766 767
1203 16 766 768
1204 19 766 769
1205 16 769 770
1206 16 769 771
1207 19 769 772
1208 16 775 776
1209 16 775 777
1210 19 775 778
1211 25 757 759
1212 16 828 829
1213 16 828 830
1214 17 828 831
1215 18 781 782
1216 18 781 783
1217 18 781 784
1218 24 753 754
1219 25 753 758
1220 16 778 779
1221 16 778 780
1222 17 778 781
1223 14 826 827
1224 15 826 828
1225 15 826 835
1226 12 823 824
1227 12 823 825
1228 13 823 826
1229 16 803 804
1230 16 803 805
1231 17 803 806
1232 16 740 741
1233 16 740 742
1234 19 740 743
1235 16 743 744
1236 16 743 745
1237 17 743 746

Angles

1 31 424 427 428
2 31 424 427 429
3 31 424 427 430
4 32 428 427 429
5 32 428 427 430
6 32 429 427 430
7 34 421 424 425
8 34 421 424 426
9 36 421 424 427
10 29 425 424 426
11 30 425 424 427
12 30 426 424 427
13 34 418 421 422
14 34 418 421 423
15 35 418 421 424
16 29 422 421 423
17 34 422 421 424
18 34 423 421 424
19 49 362 368 369
20 49 362 368 370
21 50 362 368 371
22 51 369 368 370
23 52 369 368 371
24 52 370 368 371
25 47 361 362 365
26 48 361 362 368
27 48 365 362 368
28 44 362 365 364
29 46 362 365 367
30 45 364 365 367
31 42 360 364 363
32 43 360 364 365
33 41 363 364 365
34 40 358 363 364
35 38 358 363 394
36 39 364 363 394
37 19 396 406 407
38 19 396 406 408
39 20 396 406 409
40 21 407 406 408
41 22 407 406 409
42 22 408 406 409
43 5 394 395 398
44 6 394 395 404
45 7 398 395 404
46 8 398 396 403
47 9 398 396 406
48 9 398 396 431
49 9 403 396 406
50 9 403 396 431
51 10 406 396 431
52 19 396 431 432
53 19 396 431 433
54 20 396 431 434
55 21 432 431 433
56 22 432 431 434
57 22 433 431 434
58 27 409 411 412
59 27 409 411 413
60 28 409 411 414
61 29 412 411 413
62 30 412 411 414
63 30 413 411 414
64 1 394 393 397
65 17 363 394 393
66 18 363 394 395
67 2 393 394 395
68 14 395 398 396
69 15 395 398 397
70 16 396 398 397
71 11 393 397 398
72 12 393 397 402
73 13 398 397 402
74 12 397 402 399
75 13 397 402 403
76 11 399 402 403
77 14 396 403 401
78 16 396 403 402
79 15 401 403 402
80 1 400 399 402
81 5 400 401 403
82 6 400 401 405
83 7 403 401 405
84 2 399 400 401
85 17 399 400 457
86 18 401 400 457
87 27 409 418 419
88 27 409 418 420
89 33 409 418 421
90 29 419 418 420
91 34 419 418 421
92 34 420 418 421
93 23 406 409 410
94 24 406 409 411
95 24 406 409 418
96 25 410 409 411
97 25 410 409 418
98 26 411 409 418
99 31 411 414 415
100 31 411 414 416
101 31 411 414 417
102 32 415 414 416
103 32 415 414 417
104 32 416 414 417
105 31 190 193 194
106 31 190 193 195
107 31 190 193 196
108 32 194 193 195
109 32 194 193 196
110 32 195 193 196
111 31 1037 1040 1041
112 31 1037 1040 1042
113 31 1037 1040 1043
114 32 1041 1040 1042
115 32 1041 1040 1043
116 32 1042 1040 1043
117 34 1009 1012 1013
118 34 1009 1012 1014
119 36 1009 1012 1015
120 29 1013 1012 1014
121 30 1013 1012 1015
122 30 1014 1012 1015
123 27 997 1006 1007
124 27 997 1006 1008
125 33 997 1006 1009
126 29 1007 1006 1008
127 34 1007 1006 1009
128 34 1008 1006 1009
129 34 1006 1009 1010
130 34 1006 1009 1011
131 35 1006 1009 1012
132 29 1010 1009 1011
133 34 1010 1009 1012
134 34 1011 1009 1012
135 31 1012 1015 1016
136 31 1012 1015 1017
137 31 1012 1015 1018
138 32 1016 1015 1017
139 32 1016 1015 1018
140 32 1017 1015 1018
141 34 374 377 378
142 34 374 377 379
143 35 374 377 380
144 29 378 377 379
145 34 378 377 380
146 34 379 377 380
147 34 377 380 381
148 34 377 380 382
149 35 377 380 383
150 29 381 380 382
151 34 381 380 383
152 34 382 380 383
153 34 380 383 384
154 34 380 383 385
155 35 380 383 386
156 29 384 383 385
157 34 384 383 386
158 34 385 383 386
159 34 383 386 387
160 34 383 386 388
161 36 383 386 389
162 29 387 386 388
163 30 387 386 389
164 30 388 386 389
165 31 313 316 317
166 31 313 316 318
167 31 313 316 319
168 32 317 316 318
169 32 317 316 319
170 32 318 316 319
171 27 311 313 314
172 27 311 313 315
173 28 311 313 316
174 29 314 313 315
175 30 314 313 316
176 30 315 313 316
177 53 368 371 372
178 53 368 371 373
179 54 368 371 374
180 29 372 371 373
181 34 372 371 374
182 34 373 371 374
183 38 302 359 358
184 39 302 359 360
185 40 358 359 360
186 41 359 360 361
187 42 359 360 364
188 43 361 360 364
189 2 301 302 303
190 17 301 302 359
191 18 303 302 359
192 5 302 303 305
193 6 302 303 307
194 7 305 303 307
195 44 360 361 362
196 45 360 361 366
197 46 362 361 366
198 34 371 374 375
199 34 371 374 376
200 35 371 374 377
201 29 375 374 376
202 34 375 374 377
203 34 376 374 377
204 14 298 305 303
205 16 298 305 304
206 15 303 305 304
207 23 333 336 337
208 24 333 336 338
209 24 333 336 345
210 25 337 336 338
211 25 337 336 345
212 26 338 336 345
213 31 386 389 390
214 31 386 389 391
215 31 386 389 392
216 32 390 389 391
217 32 390 389 392
218 32 391 389 392
219 31 338 341 342
220 31 338 341 343
221 31 338 341 344
222 32 342 341 343
223 32 342 341 344
224 32 343 341 344
225 23 431 434 435
226 24 431 434 436
227 24 431 434 443
228 25 435 434 436
229 25 435 434 443
230 26 436 434 443
231 27 434 443 444
232 27 434 443 445
233 33 434 443 446
234 29 444 443 445
235 34 444 443 446
236 34 445 443 446
237 34 443 446 447
238 34 443 446 448
239 35 443 446 449
240 29 447 446 448
241 34 447 446 449
242 34 448 446 449
243 34 446 449 450
244 34 446 449 451
245 36 446 449 452
246 29 450 449 451
247 30 450 449 452
248 30 451 449 452
249 31 449 452 453
250 31 449 452 454
251 31 449 452 455
252 32 453 452 454
253 32 453 452 455
254 32 454 452 455
255 27 336 345 346
256 27 336 345 347
257 33 336 345 348
258 29 346 345 347
259 34 346 345 348
260 34 347 345 348
261 27 434 436 437
262 27 434 436 438
263 28 434 436 439
264 29 437 436 438
265 30 437 436 439
266 30 438 436 439
267 31 436 439 440
268 31 436 439 441
269 31 436 439 442
270 32 440 439 441
271 32 440 439 442
272 32 441 439 442
273 37 359 358 363
274 1 302 301 304
275 12 299 304 301
276 13 299 304 305
277 11 301 304 305
278 11 295 299 300
279 12 295 299 304
280 13 300 299 304
281 37 457 456 461
282 38 400 457 456
283 39 400 457 458
284 40 456 457 458
285 44 458 459 460
286 45 458 459 464
287 46 460 459 464
288 41 457 458 459
289 42 457 458 462
290 43 459 458 462
291 42 458 462 461
292 43 458 462 463
293 41 461 462 463
294 40 456 461 462
295 38 456 461 492
296 39 462 461 492
297 47 459 460 463
298 48 459 460 466
299 48 463 460 466
300 44 460 463 462
301 46 460 463 465
302 45 462 463 465
303 49 460 466 467
304 49 460 466 468
305 50 460 466 469
306 51 467 466 468
307 52 467 466 469
308 52 468 466 469
309 53 466 469 470
310 53 466 469 471
311 54 466 469 472
312 29 470 469 471
313 34 470 469 472
314 34 471 469 472
315 34 469 472 473
316 34 469 472 474
317 35 469 472 475
318 29 473 472 474
319 34 473 472 475
320 34 474 472 475
321 34 472 475 476
322 34 472 475 477
323 35 472 475 478
324 29 476 475 477
325 34 476 475 478
326 34 477 475 478
327 31 620 623 624
328 31 620 623 625
329 31 620 623 626
330 32 624 623 625
331 32 624 623 626
332 32 625 623 626
333 34 1158 1161 1162
334 34 1158 1161 1163
335 35 1158 1161 1164
336 29 1162 1161 1163
337 34 1162 1161 1164
338 34 1163 1161 1164
339 34 1161 1164 1165
340 34 1161 1164 1166
341 35 1161 1164 1167
342 29 1165 1164 1166
343 34 1165 1164 1167
344 34 1166 1164 1167
345 1 492 491 495
346 11 491 495 496
347 12 491 495 500
348 13 496 495 500
349 17 461 492 491
350 18 461 492 493
351 2 491 492 493
352 34 1164 1167 1168
353 34 1164 1167 1169
354 35 1164 1167 1170
355 29 1168 1167 1169
356 34 1168 1167 1170
357 34 1169 1167 1170
358 31 1170 1173 1174
359 31 1170 1173 1175
360 31 1170 1173 1176
361 32 1174 1173 1175
362 32 1174 1173 1176
363 32 1175 1173 1176
364 34 1167 1170 1171
365 34 1167 1170 1172
366 36 1167 1170 1173
367 29 1171 1170 1172
368 30 1171 1170 1173
369 30 1172 1170 1173
370 27 507 509 510
371 27 507 509 511
372 28 507 509 512
373 29 510 509 511
374 30 510 509 512
375 30 511 509 512
376 23 504 507 508
377 24 504 507 509
378 24 504 507 516
379 25 508 507 509
380 25 508 507 516
381 26 509 507 516
382 34 516 519 520
383 34 516 519 521
384 35 516 519 522
385 29 520 519 521
386 34 520 519 522
387 34 521 519 522
388 5 492 493 496
389 6 492 493 502
390 7 496 493 502
391 27 507 516 517
392 27 507 516 518
393 33 507 516 519
394 29 517 516 518
395 34 517 516 519
396 34 518 516 519
397 14 493 496 494
398 15 493 496 495
399 16 494 496 495
400 31 522 525 526
401 31 522 525 527
402 31 522 525 528
403 32 526 525 527
404 32 526 525 528
405 32 527 525 528
406 34 519 522 523
407 34 519 522 524
408 36 519 522 525
409 29 523 522 524
410 30 523 522 525
411 30 524 522 525
412 34 971 974 975
413 34 971 974 976
414 36 971 974 977
415 29 975 974 976
416 30 975 974 977
417 30 976 974 977
418 34 187 190 191
419 34 187 190 192
420 36 187 190 193
421 29 191 190 192
422 30 191 190 193
423 30 192 190 193
424 34 184 187 188
425 34 184 187 189
426 35 184 187 190
427 29 188 187 189
428 34 188 187 190
429 34 189 187 190
430 34 965 968 969
431 34 965 968 970
432 35 965 968 971
433 29 969 968 970
434 34 969 968 971
435 34 970 968 971
436 34 968 971 972
437 34 968 971 973
438 35 968 971 974
439 29 972 971 973
440 34 972 971 974
441 34 973 971 974
442 31 974 977 978
443 31 974 977 979
444 31 974 977 980
445 32 978 977 979
446 32 978 977 980
447 32 979 977 980
448 34 181 184 185
449 34 181 184 186
450 35 181 184 187
451 29 185 184 186
452 34 185 184 187
453 34 186 184 187
454 34 178 181 182
455 34 178 181 183
456 35 178 181 184
457 29 182 181 183
458 34 182 181 184
459 34 183 181 184
460 34 1034 1037 1038
461 34 1034 1037 1039
462 36 1034 1037 1040
463 29 1038 1037 1039
464 30 1038 1037 1040
465 30 1039 1037 1040
466 34 1031 1034 1035
467 34 1031 1034 1036
468 35 1031 1034 1037
469 29 1035 1034 1036
470 34 1035 1034 1037
471 34 1036 1034 1037
472 27 1022 1031 1032
473 27 1022 1031 1033
474 33 1022 1031 1034
475 29 1032 1031 1033
476 34 1032 1031 1034
477 34 1033 1031 1034
478 34 175 178 179
479 34 175 178 180
480 35 175 178 181
481 29 179 178 180
482 34 179 178 181
483 34 180 178 181
484 53 172 175 176
485 53 172 175 177
486 54 172 175 178
487 29 176 175 177
488 34 176 175 178
489 34 177 175 178
490 49 166 172 173
491 49 166 172 174
492 50 166 172 175
493 51 173 172 174
494 52 173 172 175
495 52 174 172 175
496 34 617 620 621
497 34 617 620 622
498 36 617 620 623
499 29 621 620 622
500 30 621 620 623
501 30 622 620 623
502 34 614 617 618
503 34 614 617 619
504 35 614 617 620
505 29 618 617 619
506 34 618 617 620
507 34 619 617 620
508 27 605 614 615
509 27 605 614 616
510 33 605 614 617
511 29 615 614 616
512 34 615 614 617
513 34 616 614 617
514 31 607 610 611
515 31 607 610 612
516 31 607 610 613
517 32 611 610 612
518 32 611 610 613
519 32 612 610 613
520 27 605 607 608
521 27 605 607 609
522 28 605 607 610
523 29 608 607 609
524 30 608 607 610
525 30 609 607 610
526 23 602 605 606
527 24 602 605 607
528 24 602 605 614
529 25 606 605 607
530 25 606 605 614
531 26 607 605 614
532 19 592 602 603
533 19 592 602 604
534 20 592 602 605
535 21 603 602 604
536 22 603 602 605
537 22 604 602 605
538 19 592 627 628
539 19 592 627 629
540 20 592 627 630
541 21 628 627 629
542 22 628 627 630
543 22 629 627 630
544 23 627 630 631
545 24 627 630 632
546 24 627 630 639
547 25 631 630 632
548 25 631 630 639
549 26 632 630 639
550 34 1155 1158 1159
551 34 1155 1158 1160
552 35 1155 1158 1161
553 29 1159 1158 1160
554 34 1159 1158 1161
555 34 1160 1158 1161
556 53 1152 1155 1156
557 53 1152 1155 1157
558 54 1152 1155 1158
559 29 1156 1155 1157
560 34 1156 1155 1158
561 34 1157 1155 1158
562 31 632 635 636
563 31 632 635 637
564 31 632 635 638
565 32 636 635 637
566 32 636 635 638
567 32 637 635 638
568 27 630 632 633
569 27 630 632 634
570 28 630 632 635
571 29 633 632 634
572 30 633 632 635
573 30 634 632 635
574 49 1146 1152 1153
575 49 1146 1152 1154
576 50 1146 1152 1155
577 51 1153 1152 1154
578 52 1153 1152 1155
579 52 1154 1152 1155
580 31 509 512 513
581 31 509 512 514
582 31 509 512 515
583 32 513 512 514
584 32 513 512 515
585 32 514 512 515
586 49 950 956 957
587 49 950 956 958
588 50 950 956 959
589 51 957 956 958
590 52 957 956 959
591 52 958 956 959
592 34 962 965 966
593 34 962 965 967
594 35 962 965 968
595 29 966 965 967
596 34 966 965 968
597 34 967 965 968
598 47 949 950 953
599 48 949 950 956
600 48 953 950 956
601 44 950 953 952
602 46 950 953 955
603 45 952 953 955
604 34 959 962 963
605 34 959 962 964
606 35 959 962 965
607 29 963 962 964
608 34 963 962 965
609 34 964 962 965
610 53 956 959 960
611 53 956 959 961
612 54 956 959 962
613 29 960 959 961
614 34 960 959 962
615 34 961 959 962
616 31 926 929 930
617 31 926 929 931
618 31 926 929 932
619 32 930 929 931
620 32 930 929 932
621 32 931 929 932
622 31 1024 1027 1028
623 31 1024 1027 1029
624 31 1024 1027 1030
625 32 1028 1027 1029
626 32 1028 1027 1030
627 32 1029 1027 1030
628 19 984 994 995
629 19 984 994 996
630 20 984 994 997
631 21 995 994 996
632 22 995 994 997
633 22 996 994 997
634 23 1019 1022 1023
635 24 1019 1022 1024
636 24 1019 1022 1031
637 25 1023 1022 1024
638 25 1023 1022 1031
639 26 1024 1022 1031
640 27 1022 1024 1025
641 27 1022 1024 1026
642 28 1022 1024 1027
643 29 1025 1024 1026
644 30 1025 1024 1027
645 30 1026 1024 1027
646 19 984 1019 1020
647 19 984 1019 1021
648 20 984 1019 1022
649 21 1020 1019 1021
650 22 1020 1019 1022
651 22 1021 1019 1022
652 5 982 983 986
653 6 982 983 992
654 7 986 983 992
655 14 983 986 984
656 15 983 986 985
657 16 984 986 985
658 8 986 984 991
659 9 986 984 994
660 9 986 984 1019
661 9 991 984 994
662 9 991 984 1019
663 10 994 984 1019
664 11 981 985 986
665 12 981 985 990
666 13 986 985 990
667 12 985 990 987
668 13 985 990 991
669 11 987 990 991
670 14 984 991 989
671 16 984 991 990
672 15 989 991 990
673 23 994 997 998
674 24 994 997 999
675 24 994 997 1006
676 25 998 997 999
677 25 998 997 1006
678 26 999 997 1006
679 27 630 639 640
680 27 630 639 641
681 33 630 639 642
682 29 640 639 641
683 34 640 639 642
684 34 641 639 642
685 31 999 1002 1003
686 31 999 1002 1004
687 31 999 1002 1005
688 32 1003 1002 1004
689 32 1003 1002 1005
690 32 1004 1002 1005
691 5 988 989 991
692 6 988 989 993
693 7 991 989 993
694 27 997 999 1000
695 27 997 999 1001
696 28 997 999 1002
697 29 1000 999 1001
698 30 1000 999 1002
699 30 1001 999 1002
700 2 987 988 989
701 17 987 988 1045
702 18 989 988 1045
703 34 639 642 643
704 34 639 642 644
705 35 639 642 645
706 29 643 642 644
707 34 643 642 645
708 34 644 642 645
709 34 642 645 646
710 34 642 645 647
711 36 642 645 648
712 29 646 645 647
713 30 646 645 648
714 30 647 645 648
715 31 645 648 649
716 31 645 648 650
717 31 645 648 651
718 32 649 648 650
719 32 649 648 651
720 32 650 648 651
721 31 901 904 905
722 31 901 904 906
723 31 901 904 907
724 32 905 904 906
725 32 905 904 907
726 32 906 904 907
727 27 899 901 902
728 27 899 901 903
729 28 899 901 904
730 29 902 901 903
731 30 902 901 904
732 30 903 901 904
733 23 896 899 900
734 24 896 899 901
735 24 896 899 908
736 25 900 899 901
737 25 900 899 908
738 26 901 899 908
739 19 886 896 897
740 19 886 896 898
741 20 886 896 899
742 21 897 896 898
743 22 897 896 899
744 22 898 896 899
745 27 899 908 909
746 27 899 908 910
747 33 899 908 911
748 29 909 908 910
749 34 909 908 911
750 34 910 908 911
751 34 908 911 912
752 34 908 911 913
753 35 908 911 914
754 29 912 911 913
755 34 912 911 914
756 34 913 911 914
757 44 948 949 950
758 45 948 949 954
759 46 950 949 954
760 42 948 952 951
761 43 948 952 953
762 41 951 952 953
763 8 888 886 893
764 9 888 886 896
765 9 888 886 921
766 9 893 886 896
767 9 893 886 921
768 10 896 886 921
769 41 947 948 949
770 42 947 948 952
771 43 949 948 952
772 38 890 947 946
773 39 890 947 948
774 40 946 947 948
775 2 889 890 891
776 17 889 890 947
777 18 891 890 947
778 1 890 889 892
779 5 890 891 893
780 6 890 891 895
781 7 893 891 895
782 14 886 893 891
783 16 886 893 892
784 15 891 893 892
785 11 883 887 888
786 12 883 887 892
787 13 888 887 892
788 12 887 892 889
789 13 887 892 893
790 11 889 892 893
791 17 951 982 981
792 18 951 982 983
793 2 981 982 983
794 37 947 946 951
795 40 946 951 952
796 38 946 951 982
797 39 952 951 982
798 1 982 981 985
799 31 44 47 48
800 31 44 47 49
801 31 44 47 50
802 32 48 47 49
803 32 48 47 50
804 32 49 47 50
805 19 4 39 40
806 19 4 39 41
807 20 4 39 42
808 21 40 39 41
809 22 40 39 42
810 22 41 39 42
811 1 988 987 990
812 27 42 44 45
813 27 42 44 46
814 28 42 44 47
815 29 45 44 46
816 30 45 44 47
817 30 46 44 47
818 31 32 35 36
819 31 32 35 37
820 31 32 35 38
821 32 36 35 37
822 32 36 35 38
823 32 37 35 38
824 27 17 26 27
825 27 17 26 28
826 33 17 26 29
827 29 27 26 28
828 34 27 26 29
829 34 28 26 29
830 27 17 19 20
831 27 17 19 21
832 28 17 19 22
833 29 20 19 21
834 30 20 19 22
835 30 21 19 22
836 23 14 17 18
837 24 14 17 19
838 24 14 17 26
839 25 18 17 19
840 25 18 17 26
841 26 19 17 26
842 31 19 22 23
843 31 19 22 24
844 31 19 22 25
845 32 23 22 24
846 32 23 22 25
847 32 24 22 25
848 34 29 32 33
849 34 29 32 34
850 36 29 32 35
851 29 33 32 34
852 30 33 32 35
853 30 34 32 35
854 34 26 29 30
855 34 26 29 31
856 35 26 29 32
857 29 30 29 31
858 34 30 29 32
859 34 31 29 32
860 31 914 917 918
861 31 914 917 919
862 31 914 917 920
863 32 918 917 919
864 32 918 917 920
865 32 919 917 920
866 34 911 914 915
867 34 911 914 916
868 36 911 914 917
869 29 915 914 916
870 30 915 914 917
871 30 916 914 917
872 23 39 42 43
873 24 39 42 44
874 24 39 42 51
875 25 43 42 44
876 25 43 42 51
877 26 44 42 51
878 27 42 51 52
879 27 42 51 53
880 33 42 51 54
881 29 52 51 53
882 34 52 51 54
883 34 53 51 54
884 34 51 54 55
885 34 51 54 56
886 35 51 54 57
887 29 55 54 56
888 34 55 54 57
889 34 56 54 57
890 31 57 60 61
891 31 57 60 62
892 31 57 60 63
893 32 61 60 62
894 32 61 60 63
895 32 62 60 63
896 34 54 57 58
897 34 54 57 59
898 36 54 57 60
899 29 58 57 59
900 30 58 57 60
901 30 59 57 60
902 27 311 320 321
903 27 311 320 322
904 33 311 320 323
905 29 321 320 322
906 34 321 320 323
907 34 322 320 323
908 34 323 326 327
909 34 323 326 328
910 36 323 326 329
911 29 327 326 328
912 30 327 326 329
913 30 328 326 329
914 23 308 311 312
915 24 308 311 313
916 24 308 311 320
917 25 312 311 313
918 25 312 311 320
919 26 313 311 320
920 19 298 308 309
921 19 298 308 310
922 20 298 308 311
923 21 309 308 310
924 22 309 308 311
925 22 310 308 311
926 8 300 298 305
927 9 300 298 308
928 9 300 298 333
929 9 305 298 308
930 9 305 298 333
931 10 308 298 333
932 19 298 333 334
933 19 298 333 335
934 20 298 333 336
935 21 334 333 335
936 22 334 333 336
937 22 335 333 336
938 27 336 338 339
939 27 336 338 340
940 28 336 338 341
941 29 339 338 340
942 30 339 338 341
943 30 340 338 341
944 34 320 323 324
945 34 320 323 325
946 35 320 323 326
947 29 324 323 325
948 34 324 323 326
949 34 325 323 326
950 34 348 351 352
951 34 348 351 353
952 36 348 351 354
953 29 352 351 353
954 30 352 351 354
955 30 353 351 354
956 34 345 348 349
957 34 345 348 350
958 35 345 348 351
959 29 349 348 350
960 34 349 348 351
961 34 350 348 351
962 31 351 354 355
963 31 351 354 356
964 31 351 354 357
965 32 355 354 356
966 32 355 354 357
967 32 356 354 357
968 34 478 481 482
969 34 478 481 483
970 35 478 481 484
971 29 482 481 483
972 34 482 481 484
973 34 483 481 484
974 31 484 487 488
975 31 484 487 489
976 31 484 487 490
977 32 488 487 489
978 32 488 487 490
979 32 489 487 490
980 34 481 484 485
981 34 481 484 486
982 36 481 484 487
983 29 485 484 486
984 30 485 484 487
985 30 486 484 487
986 34 475 478 479
987 34 475 478 480
988 35 475 478 481
989 29 479 478 480
990 34 479 478 481
991 34 480 478 481
992 14 297 300 298
993 15 297 300 299
994 16 298 300 299
995 5 296 297 300
996 6 296 297 306
997 7 300 297 306
998 40 260 265 266
999 38 260 265 296
1000 39 266 265 296
1001 37 261 260 265
1002 1 296 295 299
1003 17 265 296 295
1004 18 265 296 297
1005 2 295 296 297
1006 42 262 266 265
1007 43 262 266 267
1008 41 265 266 267
1009 31 326 329 330
1010 31 326 329 331
1011 31 326 329 332
1012 32 330 329 331
1013 32 330 329 332
1014 32 331 329 332
1015 38 204 261 260
1016 39 204 261 262
1017 40 260 261 262
1018 41 261 262 263
1019 42 261 262 266
1020 43 263 262 266
1021 44 264 267 266
1022 46 264 267 269
1023 45 266 267 269
1024 27 532 541 542
1025 27 532 541 543
1026 33 532 541 544
1027 29 542 541 543
1028 34 542 541 544
1029 34 543 541 544
1030 27 532 534 535
1031 27 532 534 536
1032 28 532 534 537
1033 29 535 534 536
1034 30 535 534 537
1035 30 536 534 537
1036 31 534 537 538
1037 31 534 537 539
1038 31 534 537 540
1039 32 538 537 539
1040 32 538 537 540
1041 32 539 537 540
1042 34 541 544 545
1043 34 541 544 546
1044 35 541 544 547
1045 29 545 544 546
1046 34 545 544 547
1047 34 546 544 547
1048 34 544 547 548
1049 34 544 547 549
1050 36 544 547 550
1051 29 548 547 549
1052 30 548 547 550
1053 30 549 547 550
1054 31 547 550 551
1055 31 547 550 552
1056 31 547 550 553
1057 32 551 550 552
1058 32 551 550 553
1059 32 552 550 553
1060 1 198 197 201
1061 31 253 256 257
1062 31 253 256 258
1063 31 253 256 259
1064 32 257 256 258
1065 32 257 256 259
1066 32 258 256 259
1067 1 204 203 206
1068 34 247 250 251
1069 34 247 250 252
1070 35 247 250 253
1071 29 251 250 252
1072 34 251 250 253
1073 34 252 250 253
1074 34 250 253 254
1075 34 250 253 255
1076 36 250 253 256
1077 29 254 253 255
1078 30 254 253 256
1079 30 255 253 256
1080 27 238 247 248
1081 27 238 247 249
1082 33 238 247 250
1083 29 248 247 249
1084 34 248 247 250
1085 34 249 247 250
1086 2 203 204 205
1087 17 203 204 261
1088 18 205 204 261
1089 12 201 206 203
1090 13 201 206 207
1091 11 203 206 207
1092 11 197 201 202
1093 12 197 201 206
1094 13 202 201 206
1095 14 199 202 200
1096 15 199 202 201
1097 16 200 202 201
1098 23 235 238 239
1099 24 235 238 240
1100 24 235 238 247
1101 25 239 238 240
1102 25 239 238 247
1103 26 240 238 247
1104 14 200 207 205
1105 16 200 207 206
1106 15 205 207 206
1107 5 204 205 207
1108 6 204 205 209
1109 7 207 205 209
1110 34 285 288 289
1111 34 285 288 290
1112 36 285 288 291
1113 29 289 288 290
1114 30 289 288 291
1115 30 290 288 291
1116 31 288 291 292
1117 31 288 291 293
1118 31 288 291 294
1119 32 292 291 293
1120 32 292 291 294
1121 32 293 291 294
1122 1 498 497 500
1123 2 497 498 499
1124 17 497 498 555
1125 18 499 498 555
1126 12 495 500 497
1127 13 495 500 501
1128 11 497 500 501
1129 5 498 499 501
1130 6 498 499 503
1131 7 501 499 503
1132 38 498 555 554
1133 39 498 555 556
1134 40 554 555 556
1135 41 555 556 557
1136 42 555 556 560
1137 43 557 556 560
1138 44 556 557 558
1139 45 556 557 562
1140 46 558 557 562
1141 34 282 285 286
1142 34 282 285 287
1143 35 282 285 288
1144 29 286 285 287
1145 34 286 285 288
1146 34 287 285 288
1147 27 238 240 241
1148 27 238 240 242
1149 28 238 240 243
1150 29 241 240 242
1151 30 241 240 243
1152 30 242 240 243
1153 31 240 243 244
1154 31 240 243 245
1155 31 240 243 246
1156 32 244 243 245
1157 32 244 243 246
1158 32 245 243 246
1159 19 494 504 505
1160 19 494 504 506
1161 20 494 504 507
1162 21 505 504 506
1163 22 505 504 507
1164 22 506 504 507
1165 8 496 494 501
1166 9 496 494 504
1167 9 496 494 529
1168 9 501 494 504
1169 9 501 494 529
1170 10 504 494 529
1171 19 494 529 530
1172 19 494 529 531
1173 20 494 529 532
1174 21 530 529 531
1175 22 530 529 532
1176 22 531 529 532
1177 23 529 532 533
1178 24 529 532 534
1179 24 529 532 541
1180 25 533 532 534
1181 25 533 532 541
1182 26 534 532 541
1183 14 494 501 499
1184 16 494 501 500
1185 15 499 501 500
1186 47 165 166 169
1187 48 165 166 172
1188 48 169 166 172
1189 44 164 165 166
1190 45 164 165 170
1191 46 166 165 170
1192 44 166 169 168
1193 46 166 169 171
1194 45 168 169 171
1195 2 105 106 107
1196 17 105 106 163
1197 18 107 106 163
1198 41 163 164 165
1199 42 163 164 168
1200 43 165 164 168
1201 38 106 163 162
1202 39 106 163 164
1203 40 162 163 164
1204 42 164 168 167
1205 43 164 168 169
1206 41 167 168 169
1207 40 162 167 168
1208 38 162 167 198
1209 39 168 167 198
1210 17 167 198 197
1211 18 167 198 199
1212 2 197 198 199
1213 37 163 162 167
1214 8 594 592 599
1215 9 594 592 602
1216 9 594 592 627
1217 9 599 592 602
1218 9 599 592 627
1219 10 602 592 627
1220 14 592 599 597
1221 16 592 599 598
1222 15 597 599 598
1223 12 593 598 595
1224 13 593 598 599
1225 11 595 598 599
1226 1 596 595 598
1227 11 589 593 594
1228 12 589 593 598
1229 13 594 593 598
1230 14 591 594 592
1231 15 591 594 593
1232 16 592 594 593
1233 1 590 589 593
1234 5 198 199 202
1235 6 198 199 208
1236 7 202 199 208
1237 37 555 554 559
1238 47 1145 1146 1149
1239 48 1145 1146 1152
1240 48 1149 1146 1152
1241 44 1144 1145 1146
1242 45 1144 1145 1150
1243 46 1146 1145 1150
1244 40 554 559 560
1245 38 554 559 590
1246 39 560 559 590
1247 42 556 560 559
1248 43 556 560 561
1249 41 559 560 561
1250 1 1086 1085 1088
1251 5 590 591 594
1252 6 590 591 600
1253 7 594 591 600
1254 17 559 590 589
1255 18 559 590 591
1256 2 589 590 591
1257 5 1086 1087 1089
1258 6 1086 1087 1091
1259 7 1089 1087 1091
1260 2 1085 1086 1087
1261 17 1085 1086 1143
1262 18 1087 1086 1143
1263 38 1086 1143 1142
1264 39 1086 1143 1144
1265 40 1142 1143 1144
1266 41 1143 1144 1145
1267 42 1143 1144 1148
1268 43 1145 1144 1148
1269 37 1143 1142 1147
1270 42 1144 1148 1147
1271 43 1144 1148 1149
1272 41 1147 1148 1149
1273 44 558 561 560
1274 46 558 561 563
1275 45 560 561 563
1276 40 1142 1147 1148
1277 55 1142 1147 1178
1278 56 1148 1147 1178
1279 47 557 558 561
1280 48 557 558 564
1281 48 561 558 564
1282 44 1146 1149 1148
1283 46 1146 1149 1151
1284 45 1148 1149 1151
1285 34 665 668 669
1286 34 665 668 670
1287 35 665 668 671
1288 29 669 668 670
1289 34 669 668 671
1290 34 670 668 671
1291 49 656 662 663
1292 49 656 662 664
1293 50 656 662 665
1294 51 663 662 664
1295 52 663 662 665
1296 52 664 662 665
1297 53 662 665 666
1298 53 662 665 667
1299 54 662 665 668
1300 29 666 665 667
1301 34 666 665 668
1302 34 667 665 668
1303 47 655 656 659
1304 48 655 656 662
1305 48 659 656 662
1306 44 654 655 656
1307 45 654 655 660
1308 46 656 655 660
1309 1 106 105 108
1310 1 100 99 103
1311 17 69 100 99
1312 18 69 100 101
1313 2 99 100 101
1314 11 99 103 104
1315 12 99 103 108
1316 13 104 103 108
1317 12 103 108 105
1318 13 103 108 109
1319 11 105 108 109
1320 44 656 659 658
1321 46 656 659 661
1322 45 658 659 661
1323 42 654 658 657
1324 43 654 658 659
1325 41 657 658 659
1326 5 596 597 599
1327 6 596 597 601
1328 7 599 597 601
1329 37 1045 1044 1049
1330 38 988 1045 1044
1331 39 988 1045 1046
1332 40 1044 1045 1046
1333 2 595 596 597
1334 17 595 596 653
1335 18 597 596 653
1336 41 1045 1046 1047
1337 42 1045 1046 1050
1338 43 1047 1046 1050
1339 40 1044 1049 1050
1340 38 1044 1049 1080
1341 39 1050 1049 1080
1342 1 1080 1079 1083
1343 38 596 653 652
1344 39 596 653 654
1345 40 652 653 654
1346 42 1046 1050 1049
1347 43 1046 1050 1051
1348 41 1049 1050 1051
1349 17 1049 1080 1079
1350 18 1049 1080 1081
1351 2 1079 1080 1081
1352 41 653 654 655
1353 42 653 654 658
1354 43 655 654 658
1355 40 652 657 658
1356 38 652 657 688
1357 39 658 657 688
1358 37 653 652 657
1359 5 1080 1081 1084
1360 6 1080 1081 1090
1361 7 1084 1081 1090
1362 44 1048 1051 1050
1363 46 1048 1051 1053
1364 45 1050 1051 1053
1365 14 1081 1084 1082
1366 15 1081 1084 1083
1367 16 1082 1084 1083
1368 11 1079 1083 1084
1369 12 1079 1083 1088
1370 13 1084 1083 1088
1371 14 1082 1089 1087
1372 16 1082 1089 1088
1373 15 1087 1089 1088
1374 12 1083 1088 1085
1375 13 1083 1088 1089
1376 11 1085 1088 1089
1377 31 92 95 96
1378 31 92 95 97
1379 31 92 95 98
1380 32 96 95 97
1381 32 96 95 98
1382 32 97 95 98
1383 34 89 92 93
1384 34 89 92 94
1385 36 89 92 95
1386 29 93 92 94
1387 30 93 92 95
1388 30 94 92 95
1389 27 924 926 927
1390 27 924 926 928
1391 28 924 926 929
1392 29 927 926 928
1393 30 927 926 929
1394 30 928 926 929
1395 31 939 942 943
1396 31 939 942 944
1397 31 939 942 945
1398 32 943 942 944
1399 32 943 942 945
1400 32 944 942 945
1401 34 86 89 90
1402 34 86 89 91
1403 35 86 89 92
1404 29 90 89 91
1405 34 90 89 92
1406 34 91 89 92
1407 34 677 680 681
1408 34 677 680 682
1409 36 677 680 683
1410 29 681 680 682
1411 30 681 680 683
1412 30 682 680 683
1413 27 924 933 934
1414 27 924 933 935
1415 33 924 933 936
1416 29 934 933 935
1417 34 934 933 936
1418 34 935 933 936
1419 34 936 939 940
1420 34 936 939 941
1421 36 936 939 942
1422 29 940 939 941
1423 30 940 939 942
1424 30 941 939 942
1425 23 921 924 925
1426 24 921 924 926
1427 24 921 924 933
1428 25 925 924 926
1429 25 925 924 933
1430 26 926 924 933
1431 14 885 888 886
1432 15 885 888 887
1433 16 886 888 887
1434 34 933 936 937
1435 34 933 936 938
1436 35 933 936 939
1437 29 937 936 938
1438 34 937 936 939
1439 34 938 936 939
1440 19 886 921 922
1441 19 886 921 923
1442 20 886 921 924
1443 21 922 921 923
1444 22 922 921 924
1445 22 923 921 924
1446 31 680 683 684
1447 31 680 683 685
1448 31 680 683 686
1449 32 684 683 685
1450 32 684 683 686
1451 32 685 683 686
1452 8 6 4 11
1453 9 6 4 14
1454 9 6 4 39
1455 9 11 4 14
1456 9 11 4 39
1457 10 14 4 39
1458 34 668 671 672
1459 34 668 671 673
1460 35 668 671 674
1461 29 672 671 673
1462 34 672 671 674
1463 34 673 671 674
1464 34 671 674 675
1465 34 671 674 676
1466 35 671 674 677
1467 29 675 674 676
1468 34 675 674 677
1469 34 676 674 677
1470 14 4 11 9
1471 16 4 11 10
1472 15 9 11 10
1473 34 674 677 678
1474 34 674 677 679
1475 35 674 677 680
1476 29 678 677 679
1477 34 678 677 680
1478 34 679 677 680
1479 5 8 9 11
1480 6 8 9 13
1481 7 11 9 13
1482 40 64 69 70
1483 38 64 69 100
1484 39 70 69 100
1485 2 7 8 9
1486 17 7 8 65
1487 18 9 8 65
1488 1 8 7 10
1489 41 65 66 67
1490 42 65 66 70
1491 43 67 66 70
1492 42 66 70 69
1493 43 66 70 71
1494 41 69 70 71
1495 38 8 65 64
1496 39 8 65 66
1497 40 64 65 66
1498 37 65 64 69
1499 19 4 14 15
1500 19 4 14 16
1501 20 4 14 17
1502 21 15 14 16
1503 22 15 14 17
1504 22 16 14 17
1505 44 1046 1047 1048
1506 45 1046 1047 1052
1507 46 1048 1047 1052
1508 47 1047 1048 1051
1509 48 1047 1048 1054
1510 48 1051 1048 1054
1511 49 1048 1054 1055
1512 49 1048 1054 1056
1513 50 1048 1054 1057
1514 51 1055 1054 1056
1515 52 1055 1054 1057
1516 52 1056 1054 1057
1517 34 1057 1060 1061
1518 34 1057 1060 1062
1519 35 1057 1060 1063
1520 29 1061 1060 1062
1521 34 1061 1060 1063
1522 34 1062 1060 1063
1523 34 1060 1063 1064
1524 34 1060 1063 1065
1525 35 1060 1063 1066
1526 29 1064 1063 1065
1527 34 1064 1063 1066
1528 34 1065 1063 1066
1529 53 1054 1057 1058
1530 53 1054 1057 1059
1531 54 1054 1057 1060
1532 29 1058 1057 1059
1533 34 1058 1057 1060
1534 34 1059 1057 1060
1535 34 1063 1066 1067
1536 34 1063 1066 1068
1537 35 1063 1066 1069
1538 29 1067 1066 1068
1539 34 1067 1066 1069
1540 34 1068 1066 1069
1541 34 861 864 865
1542 34 861 864 866
1543 35 861 864 867
1544 29 865 864 866
1545 34 865 864 867
1546 34 866 864 867
1547 49 852 858 859
1548 49 852 858 860
1549 50 852 858 861
1550 51 859 858 860
1551 52 859 858 861
1552 52 860 858 861
1553 47 851 852 855
1554 48 851 852 858
1555 48 855 852 858
1556 44 852 855 854
1557 46 852 855 857
1558 45 854 855 857
1559 53 858 861 862
1560 53 858 861 863
1561 54 858 861 864
1562 29 862 861 863
1563 34 862 861 864
1564 34 863 861 864
1565 5 884 885 888
1566 6 884 885 894
1567 7 888 885 894
1568 1 884 883 887
1569 44 850 851 852
1570 45 850 851 856
1571 46 852 851 856
1572 42 850 854 853
1573 43 850 854 855
1574 41 853 854 855
1575 17 853 884 883
1576 18 853 884 885
1577 2 883 884 885
1578 40 848 853 854
1579 38 848 853 884
1580 39 854 853 884
1581 37 849 848 853
1582 41 849 850 851
1583 42 849 850 854
1584 43 851 850 854
1585 38 792 849 848
1586 39 792 849 850
1587 40 848 849 850
1588 2 791 792 793
1589 17 791 792 849
1590 18 793 792 849
1591 1 792 791 794
1592 14 3 6 4
1593 15 3 6 5
1594 16 4 6 5
1595 12 5 10 7
1596 13 5 10 11
1597 11 7 10 11
1598 11 1 5 6
1599 12 1 5 10
1600 13 6 5 10
1601 1 2 1 5
1602 5 2 3 6
1603 6 2 3 12
1604 7 6 3 12
1605 2 1 2 3
1606 3 1 2 1177
1607 4 3 2 1177
1608 34 1066 1069 1070
1609 34 1066 1069 1071
1610 35 1066 1069 1072
1611 29 1070 1069 1071
1612 34 1070 1069 1072
1613 34 1071 1069 1072
1614 34 1069 1072 1073
1615 34 1069 1072 1074
1616 36 1069 1072 1075
1617 29 1073 1072 1074
1618 30 1073 1072 1075
1619 30 1074 1072 1075
1620 31 1072 1075 1076
1621 31 1072 1075 1077
1622 31 1072 1075 1078
1623 32 1076 1075 1077
1624 32 1076 1075 1078
1625 32 1077 1075 1078
1626 34 864 867 868
1627 34 864 867 869
1628 35 864 867 870
1629 29 868 867 869
1630 34 868 867 870
1631 34 869 867 870
1632 34 867 870 871
1633 34 867 870 872
1634 35 867 870 873
1635 29 871 870 872
1636 34 871 870 873
1637 34 872 870 873
1638 31 876 879 880
1639 31 876 879 881
1640 31 876 879 882
1641 32 880 879 881
1642 32 880 879 882
1643 32 881 879 882
1644 34 870 873 874
1645 34 870 873 875
1646 35 870 873 876
1647 29 874 873 875
1648 34 874 873 876
1649 34 875 873 876
1650 34 873 876 877
1651 34 873 876 878
1652 36 873 876 879
1653 29 877 876 878
1654 30 877 876 879
1655 30 878 876 879
1656 44 262 263 264
1657 45 262 263 268
1658 46 264 263 268
1659 47 263 264 267
1660 48 263 264 270
1661 48 267 264 270
1662 49 264 270 271
1663 49 264 270 272
1664 50 264 270 273
1665 51 271 270 272
1666 52 271 270 273
1667 52 272 270 273
1668 53 270 273 274
1669 53 270 273 275
1670 54 270 273 276
1671 29 274 273 275
1672 34 274 273 276
1673 34 275 273 276
1674 34 279 282 283
1675 34 279 282 284
1676 35 279 282 285
1677 29 283 282 284
1678 34 283 282 285
1679 34 284 282 285
1680 34 273 276 277
1681 34 273 276 278
1682 35 273 276 279
1683 29 277 276 278
1684 34 277 276 279
1685 34 278 276 279
1686 34 276 279 280
1687 34 276 279 281
1688 35 276 279 282
1689 29 280 279 281
1690 34 280 279 282
1691 34 281 279 282
1692 34 222 225 226
1693 34 222 225 227
1694 35 222 225 228
1695 29 226 225 227
1696 34 226 225 228
1697 34 227 225 228
1698 27 213 222 223
1699 27 213 222 224
1700 33 213 222 225
1701 29 223 222 224
1702 34 223 222 225
1703 34 224 222 225
1704 31 215 218 219
1705 31 215 218 220
1706 31 215 218 221
1707 32 219 218 220
1708 32 219 218 221
1709 32 220 218 221
1710 19 200 235 236
1711 19 200 235 237
1712 20 200 235 238
1713 21 236 235 237
1714 22 236 235 238
1715 22 237 235 238
1716 8 202 200 207
1717 9 202 200 210
1718 9 202 200 235
1719 9 207 200 210
1720 9 207 200 235
1721 10 210 200 235
1722 19 200 210 211
1723 19 200 210 212
1724 20 200 210 213
1725 21 211 210 212
1726 22 211 210 213
1727 22 212 210 213
1728 23 210 213 214
1729 24 210 213 215
1730 24 210 213 222
1731 25 214 213 215
1732 25 214 213 222
1733 26 215 213 222
1734 27 213 215 216
1735 27 213 215 217
1736 28 213 215 218
1737 29 216 215 217
1738 30 216 215 218
1739 30 217 215 218
1740 31 582 585 586
1741 31 582 585 587
1742 31 582 585 588
1743 32 586 585 587
1744 32 586 585 588
1745 32 587 585 588
1746 34 573 576 577
1747 34 573 576 578
1748 35 573 576 579
1749 29 577 576 578
1750 34 577 576 579
1751 34 578 576 579
1752 34 576 579 580
1753 34 576 579 581
1754 35 576 579 582
1755 29 580 579 581
1756 34 580 579 582
1757 34 581 579 582
1758 34 579 582 583
1759 34 579 582 584
1760 36 579 582 585
1761 29 583 582 584
1762 30 583 582 585
1763 30 584 582 585
1764 34 570 573 574
1765 34 570 573 575
1766 35 570 573 576
1767 29 574 573 575
1768 34 574 573 576
1769 34 575 573 576
1770 34 567 570 571
1771 34 567 570 572
1772 35 567 570 573
1773 29 571 570 572
1774 34 571 570 573
1775 34 572 570 573
1776 53 564 567 568
1777 53 564 567 569
1778 54 564 567 570
1779 29 568 567 569
1780 34 568 567 570
1781 34 569 567 570
1782 34 225 228 229
1783 34 225 228 230
1784 36 225 228 231
1785 29 229 228 230
1786 30 229 228 231
1787 30 230 228 231
1788 31 228 231 232
1789 31 228 231 233
1790 31 228 231 234
1791 32 232 231 233
1792 32 232 231 234
1793 32 233 231 234
1794 34 152 155 156
1795 34 152 155 157
1796 36 152 155 158
1797 29 156 155 157
1798 30 156 155 158
1799 30 157 155 158
1800 31 155 158 159
1801 31 155 158 160
1802 31 155 158 161
1803 32 159 158 160
1804 32 159 158 161
1805 32 160 158 161
1806 27 1095 1104 1105
1807 27 1095 1104 1106
1808 33 1095 1104 1107
1809 29 1105 1104 1106
1810 34 1105 1104 1107
1811 34 1106 1104 1107
1812 31 1110 1113 1114
1813 31 1110 1113 1115
1814 31 1110 1113 1116
1815 32 1114 1113 1115
1816 32 1114 1113 1116
1817 32 1115 1113 1116
1818 34 1107 1110 1111
1819 34 1107 1110 1112
1820 36 1107 1110 1113
1821 29 1111 1110 1112
1822 30 1111 1110 1113
1823 30 1112 1110 1113
1824 34 1104 1107 1108
1825 34 1104 1107 1109
1826 35 1104 1107 1110
1827 29 1108 1107 1109
1828 34 1108 1107 1110
1829 34 1109 1107 1110
1830 19 1082 1092 1093
1831 19 1082 1092 1094
1832 20 1082 1092 1095
1833 21 1093 1092 1094
1834 22 1093 1092 1095
1835 22 1094 1092 1095
1836 23 1092 1095 1096
1837 24 1092 1095 1097
1838 24 1092 1095 1104
1839 25 1096 1095 1097
1840 25 1096 1095 1104
1841 26 1097 1095 1104
1842 49 558 564 565
1843 49 558 564 566
1844 50 558 564 567
1845 51 565 564 566
1846 52 565 564 567
1847 52 566 564 567
1848 31 117 120 121
1849 31 117 120 122
1850 31 117 120 123
1851 32 121 120 122
1852 32 121 120 123
1853 32 122 120 123
1854 27 115 117 118
1855 27 115 117 119
1856 28 115 117 120
1857 29 118 117 119
1858 30 118 117 120
1859 30 119 117 120
1860 23 112 115 116
1861 24 112 115 117
1862 24 112 115 124
1863 25 116 115 117
1864 25 116 115 124
1865 26 117 115 124
1866 1 688 687 691
1867 5 106 107 109
1868 6 106 107 111
1869 7 109 107 111
1870 5 100 101 104
1871 6 100 101 110
1872 7 104 101 110
1873 14 101 104 102
1874 15 101 104 103
1875 16 102 104 103
1876 14 102 109 107
1877 16 102 109 108
1878 15 107 109 108
1879 8 104 102 109
1880 9 104 102 112
1881 9 104 102 137
1882 9 109 102 112
1883 9 109 102 137
1884 10 112 102 137
1885 19 102 112 113
1886 19 102 112 114
1887 20 102 112 115
1888 21 113 112 114
1889 22 113 112 115
1890 22 114 112 115
1891 19 102 137 138
1892 19 102 137 139
1893 20 102 137 140
1894 21 138 137 139
1895 22 138 137 140
1896 22 139 137 140
1897 34 124 127 128
1898 34 124 127 129
1899 35 124 127 130
1900 29 128 127 129
1901 34 128 127 130
1902 34 129 127 130
1903 27 115 124 125
1904 27 115 124 126
1905 33 115 124 127
1906 29 125 124 126
1907 34 125 124 127
1908 34 126 124 127
1909 23 137 140 141
1910 24 137 140 142
1911 24 137 140 149
1912 25 141 140 142
1913 25 141 140 149
1914 26 142 140 149
1915 27 140 149 150
1916 27 140 149 151
1917 33 140 149 152
1918 29 150 149 151
1919 34 150 149 152
1920 34 151 149 152
1921 27 140 142 143
1922 27 140 142 144
1923 28 140 142 145
1924 29 143 142 144
1925 30 143 142 145
1926 30 144 142 145
1927 34 149 152 153
1928 34 149 152 154
1929 35 149 152 155
1930 29 153 152 154
1931 34 153 152 155
1932 34 154 152 155
1933 31 142 145 146
1934 31 142 145 147
1935 31 142 145 148
1936 32 146 145 147
1937 32 146 145 148
1938 32 147 145 148
1939 8 1084 1082 1089
1940 9 1084 1082 1092
1941 9 1084 1082 1117
1942 9 1089 1082 1092
1943 9 1089 1082 1117
1944 10 1092 1082 1117
1945 17 657 688 687
1946 18 657 688 689
1947 2 687 688 689
1948 5 688 689 692
1949 6 688 689 698
1950 7 692 689 698
1951 27 1095 1097 1098
1952 27 1095 1097 1099
1953 28 1095 1097 1100
1954 29 1098 1097 1099
1955 30 1098 1097 1100
1956 30 1099 1097 1100
1957 31 1097 1100 1101
1958 31 1097 1100 1102
1959 31 1097 1100 1103
1960 32 1101 1100 1102
1961 32 1101 1100 1103
1962 32 1102 1100 1103
1963 14 689 692 690
1964 15 689 692 691
1965 16 690 692 691
1966 19 690 725 726
1967 19 690 725 727
1968 20 690 725 728
1969 21 726 725 727
1970 22 726 725 728
1971 22 727 725 728
1972 23 725 728 729
1973 24 725 728 730
1974 24 725 728 737
1975 25 729 728 730
1976 25 729 728 737
1977 26 730 728 737
1978 27 728 737 738
1979 27 728 737 739
1980 33 728 737 740
1981 29 738 737 739
1982 34 738 737 740
1983 34 739 737 740
1984 27 1120 1129 1130
1985 27 1120 1129 1131
1986 33 1120 1129 1132
1987 29 1130 1129 1131
1988 34 1130 1129 1132
1989 34 1131 1129 1132
1990 23 1117 1120 1121
1991 24 1117 1120 1122
1992 24 1117 1120 1129
1993 25 1121 1120 1122
1994 25 1121 1120 1129
1995 26 1122 1120 1129
1996 34 1129 1132 1133
1997 34 1129 1132 1134
1998 35 1129 1132 1135
1999 29 1133 1132 1134
2000 34 1133 1132 1135
2001 34 1134 1132 1135
2002 34 1132 1135 1136
2003 34 1132 1135 1137
2004 36 1132 1135 1138
2005 29 1136 1135 1137
2006 30 1136 1135 1138
2007 30 1137 1135 1138
2008 19 1082 1117 1118
2009 19 1082 1117 1119
2010 20 1082 1117 1120
2011 21 1118 1117 1119
2012 22 1118 1117 1120
2013 22 1119 1117 1120
2014 27 1120 1122 1123
2015 27 1120 1122 1124
2016 28 1120 1122 1125
2017 29 1123 1122 1124
2018 30 1123 1122 1125
2019 30 1124 1122 1125
2020 31 1122 1125 1126
2021 31 1122 1125 1127
2022 31 1122 1125 1128
2023 32 1126 1125 1127
2024 32 1126 1125 1128
2025 32 1127 1125 1128
2026 34 813 816 817
2027 34 813 816 818
2028 36 813 816 819
2029 29 817 816 818
2030 30 817 816 819
2031 30 818 816 819
2032 31 743 746 747
2033 31 743 746 748
2034 31 743 746 749
2035 32 747 746 748
2036 32 747 746 749
2037 32 748 746 749
2038 34 83 86 87
2039 34 83 86 88
2040 35 83 86 89
2041 29 87 86 88
2042 34 87 86 89
2043 34 88 86 89
2044 34 80 83 84
2045 34 80 83 85
2046 35 80 83 86
2047 29 84 83 85
2048 34 84 83 86
2049 34 85 83 86
2050 34 77 80 81
2051 34 77 80 82
2052 35 77 80 83
2053 29 81 80 82
2054 34 81 80 83
2055 34 82 80 83
2056 53 74 77 78
2057 53 74 77 79
2058 54 74 77 80
2059 29 78 77 79
2060 34 78 77 80
2061 34 79 77 80
2062 49 68 74 75
2063 49 68 74 76
2064 50 68 74 77
2065 51 75 74 76
2066 52 75 74 77
2067 52 76 74 77
2068 44 66 67 68
2069 45 66 67 72
2070 46 68 67 72
2071 44 68 71 70
2072 46 68 71 73
2073 45 70 71 73
2074 47 67 68 71
2075 48 67 68 74
2076 48 71 68 74
2077 34 127 130 131
2078 34 127 130 132
2079 36 127 130 133
2080 29 131 130 132
2081 30 131 130 133
2082 30 132 130 133
2083 1 694 693 696
2084 37 751 750 755
2085 2 693 694 695
2086 17 693 694 751
2087 18 695 694 751
2088 38 694 751 750
2089 39 694 751 752
2090 40 750 751 752
2091 41 751 752 753
2092 42 751 752 756
2093 43 753 752 756
2094 12 691 696 693
2095 13 691 696 697
2096 11 693 696 697
2097 11 687 691 692
2098 12 687 691 696
2099 13 692 691 696
2100 5 694 695 697
2101 6 694 695 699
2102 7 697 695 699
2103 31 705 708 709
2104 31 705 708 710
2105 31 705 708 711
2106 32 709 708 710
2107 32 709 708 711
2108 32 710 708 711
2109 27 703 712 713
2110 27 703 712 714
2111 33 703 712 715
2112 29 713 712 714
2113 34 713 712 715
2114 34 714 712 715
2115 19 690 700 701
2116 19 690 700 702
2117 20 690 700 703
2118 21 701 700 702
2119 22 701 700 703
2120 22 702 700 703
2121 23 700 703 704
2122 24 700 703 705
2123 24 700 703 712
2124 25 704 703 705
2125 25 704 703 712
2126 26 705 703 712
2127 27 703 705 706
2128 27 703 705 707
2129 28 703 705 708
2130 29 706 705 707
2131 30 706 705 708
2132 30 707 705 708
2133 8 692 690 697
2134 9 692 690 700
2135 9 692 690 725
2136 9 697 690 700
2137 9 697 690 725
2138 10 700 690 725
2139 14 690 697 695
2140 16 690 697 696
2141 15 695 697 696
2142 34 712 715 716
2143 34 712 715 717
2144 35 712 715 718
2145 29 716 715 717
2146 34 716 715 718
2147 34 717 715 718
2148 31 1135 1138 1139
2149 31 1135 1138 1140
2150 31 1135 1138 1141
2151 32 1139 1138 1140
2152 32 1139 1138 1141
2153 32 1140 1138 1141
2154 5 792 793 795
2155 6 792 793 797
2156 7 795 793 797
2157 12 789 794 791
2158 13 789 794 795
2159 11 791 794 795
2160 14 788 795 793
2161 16 788 795 794
2162 15 793 795 794
2163 27 728 730 731
2164 27 728 730 732
2165 28 728 730 733
2166 29 731 730 732
2167 30 731 730 733
2168 30 732 730 733
2169 31 816 819 820
2170 31 816 819 821
2171 31 816 819 822
2172 32 820 819 821
2173 32 820 819 822
2174 32 821 819 822
2175 8 790 788 795
2176 9 790 788 798
2177 9 790 788 823
2178 9 795 788 798
2179 9 795 788 823
2180 10 798 788 823
2181 19 788 798 799
2182 19 788 798 800
2183 20 788 798 801
2184 21 799 798 800
2185 22 799 798 801
2186 22 800 798 801
2187 31 718 721 722
2188 31 718 721 723
2189 31 718 721 724
2190 32 722 721 723
2191 32 722 721 724
2192 32 723 721 724
2193 23 798 801 802
2194 24 798 801 803
2195 24 798 801 810
2196 25 802 801 803
2197 25 802 801 810
2198 26 803 801 810
2199 27 801 810 811
2200 27 801 810 812
2201 33 801 810 813
2202 29 811 810 812
2203 34 811 810 813
2204 34 812 810 813
2205 34 810 813 814
2206 34 810 813 815
2207 35 810 813 816
2208 29 814 813 815
2209 34 814 813 816
2210 34 815 813 816
2211 11 785 789 790
2212 12 785 789 794
2213 13 790 789 794
2214 14 787 790 788
2215 15 787 790 789
2216 16 788 790 789
2217 1 786 785 789
2218 42 752 756 755
2219 43 752 756 757
2220 41 755 756 757
2221 5 786 787 790
2222 6 786 787 796
2223 7 790 787 796
2224 17 755 786 785
2225 18 755 786 787
2226 2 785 786 787
2227 40 750 755 756
2228 38 750 755 786
2229 39 756 755 786
2230 31 130 133 134
2231 31 130 133 135
2232 31 130 133 136
2233 32 134 133 135
2234 32 134 133 136
2235 32 135 133 136
2236 34 715 718 719
2237 34 715 718 720
2238 36 715 718 721
2239 29 719 718 720
2240 30 719 718 721
2241 30 720 718 721
2242 47 753 754 757
2243 48 753 754 760
2244 48 757 754 760
2245 31 828 831 832
2246 31 828 831 833
2247 31 828 831 834
2248 32 832 831 833
2249 32 832 831 834
2250 32 833 831 834
2251 31 841 844 845
2252 31 841 844 846
2253 31 841 844 847
2254 32 845 844 846
2255 32 845 844 847
2256 32 846 844 847
2257 34 835 838 839
2258 34 835 838 840
2259 35 835 838 841
2260 29 839 838 840
2261 34 839 838 841
2262 34 840 838 841
2263 34 769 772 773
2264 34 769 772 774
2265 35 769 772 775
2266 29 773 772 774
2267 34 773 772 775
2268 34 774 772 775
2269 31 730 733 734
2270 31 730 733 735
2271 31 730 733 736
2272 32 734 733 735
2273 32 734 733 736
2274 32 735 733 736
2275 27 826 835 836
2276 27 826 835 837
2277 33 826 835 838
2278 29 836 835 837
2279 34 836 835 838
2280 34 837 835 838
2281 34 838 841 842
2282 34 838 841 843
2283 36 838 841 844
2284 29 842 841 843
2285 30 842 841 844
2286 30 843 841 844
2287 49 754 760 761
2288 49 754 760 762
2289 50 754 760 763
2290 51 761 760 762
2291 52 761 760 763
2292 52 762 760 763
2293 53 760 763 764
2294 53 760 763 765
2295 54 760 763 766
2296 29 764 763 765
2297 34 764 763 766
2298 34 765 763 766
2299 31 803 806 807
2300 31 803 806 808
2301 31 803 806 809
2302 32 807 806 808
2303 32 807 806 809
2304 32 808 806 809
2305 34 763 766 767
2306 34 763 766 768
2307 35 763 766 769
2308 29 767 766 768
2309 34 767 766 769
2310 34 768 766 769
2311 34 766 769 770
2312 34 766 769 771
2313 35 766 769 772
2314 29 770 769 771
2315 34 770 769 772
2316 34 771 769 772
2317 34 772 775 776
2318 34 772 775 777
2319 35 772 775 778
2320 29 776 775 777
2321 34 776 775 778
2322 34 777 775 778
2323 44 754 757 756
2324 46 754 757 759
2325 45 756 757 759
2326 27 826 828 829
2327 27 826 828 830
2328 28 826 828 831
2329 29 829 828 830
2330 30 829 828 831
2331 30 830 828 831
2332 31 778 781 782
2333 31 778 781 783
2334 31 778 781 784
2335 32 782 781 783
2336 32 782 781 784
2337 32 783 781 784
2338 44 752 753 754
2339 45 752 753 758
2340 46 754 753 758
2341 34 775 778 779
2342 34 775 778 780
2343 36 775 778 781
2344 29 779 778 780
2345 30 779 778 781
2346 30 780 778 781
2347 23 823 826 827
2348 24 823 826 828
2349 24 823 826 835
2350 25 827 826 828
2351 25 827 826 835
2352 26 828 826 835
2353 19 788 823 824
2354 19 788 823 825
2355 20 788 823 826
2356 21 824 823 825
2357 22 824 823 826
2358 22 825 823 826
2359 27 801 803 804
2360 27 801 803 805
2361 28 801 803 806
2362 29 804 803 805
2363 30 804 803 806
2364 30 805 803 806
2365 34 737 740 741
2366 34 737 740 742
2367 35 737 740 743
2368 29 741 740 742
2369 34 741 740 743
2370 34 742 740 743
2371 34 740 743 744
2372 34 740 743 745
2373 36 740 743 746
2374 29 744 743 745
2375 30 744 743 746
2376 30 745 743 746

Dihedrals

1 56 421 424 427 428
2 56 421 424 427 429
3 56 421 424 427 430
4 49 425 424 427 428
5 49 425 424 427 429
6 49 425 424 427 430
7 49 426 424 427 428
8 49 426 424 427 429
9 49 426 424 427 430
10 53 418 421 424 425
11 53 418 421 424 426
12 54 418 421 424 427
13 52 422 421 424 425
14 52 422 421 424 426
15 55 422 421 424 427
16 52 423 421 424 425
17 52 423 421 424 426
18 55 423 421 424 427
19 76 362 368 371 372
20 76 362 368 371 373
21 77 362 368 371 374
22 78 369 368 371 372
23 78 369 368 371 373
24 79 369 368 371 374
25 78 370 368 371 372
26 78 370 368 371 373
27 79 370 368 371 374
28 70 361 362 365 364
29 72 361 362 365 367
30 71 368 362 365 364
31 73 368 362 365 367
32 74 361 362 368 369
33 74 361 362 368 370
34 75 361 362 368 371
35 74 365 362 368 369
36 74 365 362 368 370
37 75 365 362 368 371
38 65 360 364 365 362
39 66 360 364 365 367
40 63 363 364 365 362
41 64 363 364 365 367
42 62 358 363 364 360
43 61 358 363 364 365
44 60 394 363 364 360
45 59 394 363 364 365
46 31 358 363 394 393
47 33 358 363 394 395
48 32 364 363 394 393
49 34 364 363 394 395
50 35 396 406 409 410
51 36 396 406 409 411
52 36 396 406 409 418
53 37 407 406 409 410
54 38 407 406 409 411
55 38 407 406 409 418
56 37 408 406 409 410
57 38 408 406 409 411
58 38 408 406 409 418
59 9 394 395 398 396
60 10 394 395 398 397
61 11 404 395 398 396
62 12 404 395 398 397
63 13 403 396 398 395
64 14 403 396 398 397
65 15 406 396 398 395
66 16 406 396 398 397
67 15 431 396 398 395
68 16 431 396 398 397
69 13 398 396 403 401
70 14 398 396 403 402
71 15 406 396 403 401
72 16 406 396 403 402
73 15 431 396 403 401
74 16 431 396 403 402
75 17 398 396 406 407
76 17 398 396 406 408
77 18 398 396 406 409
78 17 403 396 406 407
79 17 403 396 406 408
80 18 403 396 406 409
81 19 431 396 406 407
82 19 431 396 406 408
83 20 431 396 406 409
84 17 398 396 431 432
85 17 398 396 431 433
86 18 398 396 431 434
87 17 403 396 431 432
88 17 403 396 431 433
89 18 403 396 431 434
90 19 406 396 431 432
91 19 406 396 431 433
92 20 406 396 431 434
93 35 396 431 434 435
94 36 396 431 434 436
95 36 396 431 434 443
96 37 432 431 434 435
97 38 432 431 434 436
98 38 432 431 434 443
99 37 433 431 434 435
100 38 433 431 434 436
101 38 433 431 434 443
102 48 409 411 414 415
103 48 409 411 414 416
104 48 409 411 414 417
105 49 412 411 414 415
106 49 412 411 414 416
107 49 412 411 414 417
108 49 413 411 414 415
109 49 413 411 414 416
110 49 413 411 414 417
111 28 397 393 394 363
112 1 397 393 394 395
113 3 394 393 397 398
114 4 394 393 397 402
115 29 363 394 395 398
116 30 363 394 395 404
117 5 393 394 395 398
118 6 393 394 395 404
119 21 393 397 398 395
120 22 393 397 398 396
121 23 402 397 398 395
122 24 402 397 398 396
123 25 393 397 402 399
124 26 393 397 402 403
125 26 398 397 402 399
126 27 398 397 402 403
127 24 397 402 403 396
128 23 397 402 403 401
129 22 399 402 403 396
130 21 399 402 403 401
131 1 402 399 400 401
132 28 402 399 400 457
133 4 400 399 402 397
134 3 400 399 402 403
135 9 400 401 403 396
136 10 400 401 403 402
137 11 405 401 403 396
138 12 405 401 403 402
139 5 399 400 401 403
140 6 399 400 401 405
141 29 457 400 401 403
142 30 457 400 401 405
143 31 399 400 457 456
144 32 399 400 457 458
145 33 401 400 457 456
146 34 401 400 457 458
147 50 409 418 421 422
148 50 409 418 421 423
149 51 409 418 421 424
150 52 419 418 421 422
151 52 419 418 421 423
152 53 419 418 421 424
153 52 420 418 421 422
154 52 420 418 421 423
155 53 420 418 421 424
156 39 406 409 411 412
157 39 406 409 411 413
158 40 406 409 411 414
159 41 410 409 411 412
160 41 410 409 411 413
161 42 410 409 411 414
162 43 418 409 411 412
163 43 418 409 411 413
164 44 418 409 411 414
165 39 406 409 418 419
166 39 406 409 418 420
167 45 406 409 418 421
168 41 410 409 418 419
169 41 410 409 418 420
170 46 410 409 418 421
171 43 411 409 418 419
172 43 411 409 418 420
173 47 411 409 418 421
174 56 1009 1012 1015 1016
175 56 1009 1012 1015 1017
176 56 1009 1012 1015 1018
177 49 1013 1012 1015 1016
178 49 1013 1012 1015 1017
179 49 1013 1012 1015 1018
180 49 1014 1012 1015 1016
181 49 1014 1012 1015 1017
182 49 1014 1012 1015 1018
183 50 997 1006 1009 1010
184 50 997 1006 1009 1011
185 51 997 1006 1009 1012
186 52 1007 1006 1009 1010
187 52 1007 1006 1009 1011
188 53 1007 1006 1009 1012
189 52 1008 1006 1009 1010
190 52 1008 1006 1009 1011
191 53 1008 1006 1009 1012
192 53 1006 1009 1012 1013
193 53 1006 1009 1012 1014
194 54 1006 1009 1012 1015
195 52 1010 1009 1012 1013
196 52 1010 1009 1012 1014
197 55 1010 1009 1012 1015
198 52 1011 1009 1012 1013
199 52 1011 1009 1012 1014
200 55 1011 1009 1012 1015
201 53 374 377 380 381
202 53 374 377 380 382
203 82 374 377 380 383
204 52 378 377 380 381
205 52 378 377 380 382
206 53 378 377 380 383
207 52 379 377 380 381
208 52 379 377 380 382
209 53 379 377 380 383
210 53 377 380 383 384
211 53 377 380 383 385
212 82 377 380 383 386
213 52 381 380 383 384
214 52 381 380 383 385
215 53 381 380 383 386
216 52 382 380 383 384
217 52 382 380 383 385
218 53 382 380 383 386
219 53 380 383 386 387
220 53 380 383 386 388
221 54 380 383 386 389
222 52 384 383 386 387
223 52 384 383 386 388
224 55 384 383 386 389
225 52 385 383 386 387
226 52 385 383 386 388
227 55 385 383 386 389
228 56 383 386 389 390
229 56 383 386 389 391
230 56 383 386 389 392
231 49 387 386 389 390
232 49 387 386 389 391
233 49 387 386 389 392
234 49 388 386 389 390
235 49 388 386 389 391
236 49 388 386 389 392
237 48 311 313 316 317
238 48 311 313 316 318
239 48 311 313 316 319
240 49 314 313 316 317
241 49 314 313 316 318
242 49 314 313 316 319
243 49 315 313 316 317
244 49 315 313 316 318
245 49 315 313 316 319
246 80 368 371 374 375
247 80 368 371 374 376
248 81 368 371 374 377
249 52 372 371 374 375
250 52 372 371 374 376
251 53 372 371 374 377
252 52 373 371 374 375
253 52 373 371 374 376
254 53 373 371 374 377
255 59 302 359 360 361
256 60 302 359 360 364
257 61 358 359 360 361
258 62 358 359 360 364
259 63 359 360 361 362
260 64 359 360 361 366
261 65 364 360 361 362
262 66 364 360 361 366
263 67 359 360 364 363
264 68 359 360 364 365
265 68 361 360 364 363
266 69 361 360 364 365
267 5 301 302 303 305
268 6 301 302 303 307
269 29 359 302 303 305
270 30 359 302 303 307
271 31 301 302 359 358
272 32 301 302 359 360
273 33 303 302 359 358
274 34 303 302 359 360
275 9 302 303 305 298
276 10 302 303 305 304
277 11 307 303 305 298
278 12 307 303 305 304
279 70 360 361 362 365
280 71 360 361 362 368
281 72 366 361 362 365
282 73 366 361 362 368
283 53 371 374 377 378
284 53 371 374 377 379
285 82 371 374 377 380
286 52 375 374 377 378
287 52 375 374 377 379
288 53 375 374 377 380
289 52 376 374 377 378
290 52 376 374 377 379
291 53 376 374 377 380
292 39 333 336 338 339
293 39 333 336 338 340
294 40 333 336 338 341
295 41 337 336 338 339
296 41 337 336 338 340
297 42 337 336 338 341
298 43 345 336 338 339
299 43 345 336 338 340
300 44 345 336 338 341
301 39 333 336 345 346
302 39 333 336 345 347
303 45 333 336 345 348
304 41 337 336 345 346
305 41 337 336 345 347
306 46 337 336 345 348
307 43 338 336 345 346
308 43 338 336 345 347
309 47 338 336 345 348
310 39 431 434 436 437
311 39 431 434 436 438
312 40 431 434 436 439
313 41 435 434 436 437
314 41 435 434 436 438
315 42 435 434 436 439
316 43 443 434 436 437
317 43 443 434 436 438
318 44 443 434 436 439
319 39 431 434 443 444
320 39 431 434 443 445
321 45 431 434 443 446
322 41 435 434 443 444
323 41 435 434 443 445
324 46 435 434 443 446
325 43 436 434 443 444
326 43 436 434 443 445
327 47 436 434 443 446
328 50 434 443 446 447
329 50 434 443 446 448
330 51 434 443 446 449
331 52 444 443 446 447
332 52 444 443 446 448
333 53 444 443 446 449
334 52 445 443 446 447
335 52 445 443 446 448
336 53 445 443 446 449
337 53 443 446 449 450
338 53 443 446 449 451
339 54 443 446 449 452
340 52 447 446 449 450
341 52 447 446 449 451
342 55 447 446 449 452
343 52 448 446 449 450
344 52 448 446 449 451
345 55 448 446 449 452
346 56 446 449 452 453
347 56 446 449 452 454
348 56 446 449 452 455
349 49 450 449 452 453
350 49 450 449 452 454
351 49 450 449 452 455
352 49 451 449 452 453
353 49 451 449 452 454
354 49 451 449 452 455
355 50 336 345 348 349
356 50 336 345 348 350
357 51 336 345 348 351
358 52 346 345 348 349
359 52 346 345 348 350
360 53 346 345 348 351
361 52 347 345 348 349
362 52 347 345 348 350
363 53 347 345 348 351
364 48 434 436 439 440
365 48 434 436 439 441
366 48 434 436 439 442
367 49 437 436 439 440
368 49 437 436 439 441
369 49 437 436 439 442
370 49 438 436 439 440
371 49 438 436 439 441
372 49 438 436 439 442
373 57 363 358 359 302
374 58 363 358 359 360
375 58 359 358 363 364
376 57 359 358 363 394
377 1 304 301 302 303
378 28 304 301 302 359
379 4 302 301 304 299
380 3 302 301 304 305
381 24 299 304 305 298
382 23 299 304 305 303
383 22 301 304 305 298
384 21 301 304 305 303
385 21 295 299 300 297
386 22 295 299 300 298
387 23 304 299 300 297
388 24 304 299 300 298
389 25 295 299 304 301
390 26 295 299 304 305
391 26 300 299 304 301
392 27 300 299 304 305
393 57 461 456 457 400
394 58 461 456 457 458
395 58 457 456 461 462
396 57 457 456 461 492
397 59 400 457 458 459
398 60 400 457 458 462
399 61 456 457 458 459
400 62 456 457 458 462
401 70 458 459 460 463
402 71 458 459 460 466
403 72 464 459 460 463
404 73 464 459 460 466
405 63 457 458 459 460
406 64 457 458 459 464
407 65 462 458 459 460
408 66 462 458 459 464
409 67 457 458 462 461
410 68 457 458 462 463
411 68 459 458 462 461
412 69 459 458 462 463
413 65 458 462 463 460
414 66 458 462 463 465
415 63 461 462 463 460
416 64 461 462 463 465
417 62 456 461 462 458
418 61 456 461 462 463
419 60 492 461 462 458
420 59 492 461 462 463
421 31 456 461 492 491
422 33 456 461 492 493
423 32 462 461 492 491
424 34 462 461 492 493
425 70 459 460 463 462
426 72 459 460 463 465
427 71 466 460 463 462
428 73 466 460 463 465
429 74 459 460 466 467
430 74 459 460 466 468
431 75 459 460 466 469
432 74 463 460 466 467
433 74 463 460 466 468
434 75 463 460 466 469
435 76 460 466 469 470
436 76 460 466 469 471
437 77 460 466 469 472
438 78 467 466 469 470
439 78 467 466 469 471
440 79 467 466 469 472
441 78 468 466 469 470
442 78 468 466 469 471
443 79 468 466 469 472
444 80 466 469 472 473
445 80 466 469 472 474
446 81 466 469 472 475
447 52 470 469 472 473
448 52 470 469 472 474
449 53 470 469 472 475
450 52 471 469 472 473
451 52 471 469 472 474
452 53 471 469 472 475
453 53 469 472 475 476
454 53 469 472 475 477
455 82 469 472 475 478
456 52 473 472 475 476
457 52 473 472 475 477
458 53 473 472 475 478
459 52 474 472 475 476
460 52 474 472 475 477
461 53 474 472 475 478
462 53 472 475 478 479
463 53 472 475 478 480
464 82 472 475 478 481
465 52 476 475 478 479
466 52 476 475 478 480
467 53 476 475 478 481
468 52 477 475 478 479
469 52 477 475 478 480
470 53 477 475 478 481
471 53 1158 1161 1164 1165
472 53 1158 1161 1164 1166
473 82 1158 1161 1164 1167
474 52 1162 1161 1164 1165
475 52 1162 1161 1164 1166
476 53 1162 1161 1164 1167
477 52 1163 1161 1164 1165
478 52 1163 1161 1164 1166
479 53 1163 1161 1164 1167
480 53 1161 1164 1167 1168
481 53 1161 1164 1167 1169
482 82 1161 1164 1167 1170
483 52 1165 1164 1167 1168
484 52 1165 1164 1167 1169
485 53 1165 1164 1167 1170
486 52 1166 1164 1167 1168
487 52 1166 1164 1167 1169
488 53 1166 1164 1167 1170
489 28 495 491 492 461
490 1 495 491 492 493
491 3 492 491 495 496
492 4 492 491 495 500
493 21 491 495 496 493
494 22 491 495 496 494
495 23 500 495 496 493
496 24 500 495 496 494
497 25 491 495 500 497
498 26 491 495 500 501
499 26 496 495 500 497
500 27 496 495 500 501
501 29 461 492 493 496
502 30 461 492 493 502
503 5 491 492 493 496
504 6 491 492 493 502
505 53 1164 1167 1170 1171
506 53 1164 1167 1170 1172
507 54 1164 1167 1170 1173
508 52 1168 1167 1170 1171
509 52 1168 1167 1170 1172
510 55 1168 1167 1170 1173
511 52 1169 1167 1170 1171
512 52 1169 1167 1170 1172
513 55 1169 1167 1170 1173
514 56 1167 1170 1173 1174
515 56 1167 1170 1173 1175
516 56 1167 1170 1173 1176
517 49 1171 1170 1173 1174
518 49 1171 1170 1173 1175
519 49 1171 1170 1173 1176
520 49 1172 1170 1173 1174
521 49 1172 1170 1173 1175
522 49 1172 1170 1173 1176
523 48 507 509 512 513
524 48 507 509 512 514
525 48 507 509 512 515
526 49 510 509 512 513
527 49 510 509 512 514
528 49 510 509 512 515
529 49 511 509 512 513
530 49 511 509 512 514
531 49 511 509 512 515
532 39 504 507 509 510
533 39 504 507 509 511
534 40 504 507 509 512
535 41 508 507 509 510
536 41 508 507 509 511
537 42 508 507 509 512
538 43 516 507 509 510
539 43 516 507 509 511
540 44 516 507 509 512
541 39 504 507 516 517
542 39 504 507 516 518
543 45 504 507 516 519
544 41 508 507 516 517
545 41 508 507 516 518
546 46 508 507 516 519
547 43 509 507 516 517
548 43 509 507 516 518
549 47 509 507 516 519
550 53 516 519 522 523
551 53 516 519 522 524
552 54 516 519 522 525
553 52 520 519 522 523
554 52 520 519 522 524
555 55 520 519 522 525
556 52 521 519 522 523
557 52 521 519 522 524
558 55 521 519 522 525
559 9 492 493 496 494
560 10 492 493 496 495
561 11 502 493 496 494
562 12 502 493 496 495
563 50 507 516 519 520
564 50 507 516 519 521
565 51 507 516 519 522
566 52 517 516 519 520
567 52 517 516 519 521
568 53 517 516 519 522
569 52 518 516 519 520
570 52 518 516 519 521
571 53 518 516 519 522
572 56 519 522 525 526
573 56 519 522 525 527
574 56 519 522 525 528
575 49 523 522 525 526
576 49 523 522 525 527
577 49 523 522 525 528
578 49 524 522 525 526
579 49 524 522 525 527
580 49 524 522 525 528
581 56 971 974 977 978
582 56 971 974 977 979
583 56 971 974 977 980
584 49 975 974 977 978
585 49 975 974 977 979
586 49 975 974 977 980
587 49 976 974 977 978
588 49 976 974 977 979
589 49 976 974 977 980
590 56 187 190 193 194
591 56 187 190 193 195
592 56 187 190 193 196
593 49 191 190 193 194
594 49 191 190 193 195
595 49 191 190 193 196
596 49 192 190 193 194
597 49 192 190 193 195
598 49 192 190 193 196
599 53 184 187 190 191
600 53 184 187 190 192
601 54 184 187 190 193
602 52 188 187 190 191
603 52 188 187 190 192
604 55 188 187 190 193
605 52 189 187 190 191
606 52 189 187 190 192
607 55 189 187 190 193
608 53 965 968 971 972
609 53 965 968 971 973
610 82 965 968 971 974
611 52 969 968 971 972
612 52 969 968 971 973
613 53 969 968 971 974
614 52 970 968 971 972
615 52 970 968 971 973
616 53 970 968 971 974
617 53 968 971 974 975
618 53 968 971 974 976
619 54 968 971 974 977
620 52 972 971 974 975
621 52 972 971 974 976
622 55 972 971 974 977
623 52 973 971 974 975
624 52 973 971 974 976
625 55 973 971 974 977
626 53 181 184 187 188
627 53 181 184 187 189
628 82 181 184 187 190
629 52 185 184 187 188
630 52 185 184 187 189
631 53 185 184 187 190
632 52 186 184 187 188
633 52 186 184 187 189
634 53 186 184 187 190
635 53 178 181 184 185
636 53 178 181 184 186
637 82 178 181 184 187
638 52 182 181 184 185
639 52 182 181 184 186
640 53 182 181 184 187
641 52 183 181 184 185
642 52 183 181 184 186
643 53 183 181 184 187
644 56 1034 1037 1040 1041
645 56 1034 1037 1040 1042
646 56 1034 1037 1040 1043
647 49 1038 1037 1040 1041
648 49 1038 1037 1040 1042
649 49 1038 1037 1040 1043
650 49 1039 1037 1040 1041
651 49 1039 1037 1040 1042
652 49 1039 1037 1040 1043
653 53 1031 1034 1037 1038
654 53 1031 1034 1037 1039
655 54 1031 1034 1037 1040
656 52 1035 1034 1037 1038
657 52 1035 1034 1037 1039
658 55 1035 1034 1037 1040
659 52 1036 1034 1037 1038
660 52 1036 1034 1037 1039
661 55 1036 1034 1037 1040
662 50 1022 1031 1034 1035
663 50 1022 1031 1034 1036
664 51 1022 1031 1034 1037
665 52 1032 1031 1034 1035
666 52 1032 1031 1034 1036
667 53 1032 1031 1034 1037
668 52 1033 1031 1034 1035
669 52 1033 1031 1034 1036
670 53 1033 1031 1034 1037
671 53 175 178 181 182
672 53 175 178 181 183
673 82 175 178 181 184
674 52 179 178 181 182
675 52 179 178 181 183
676 53 179 178 181 184
677 52 180 178 181 182
678 52 180 178 181 183
679 53 180 178 181 184
680 80 172 175 178 179
681 80 172 175 178 180
682 81 172 175 178 181
683 52 176 175 178 179
684 52 176 175 178 180
685 53 176 175 178 181
686 52 177 175 178 179
687 52 177 175 178 180
688 53 177 175 178 181
689 76 166 172 175 176
690 76 166 172 175 177
691 77 166 172 175 178
692 78 173 172 175 176
693 78 173 172 175 177
694 79 173 172 175 178
695 78 174 172 175 176
696 78 174 172 175 177
697 79 174 172 175 178
698 56 617 620 623 624
699 56 617 620 623 625
700 56 617 620 623 626
701 49 621 620 623 624
702 49 621 620 623 625
703 49 621 620 623 626
704 49 622 620 623 624
705 49 622 620 623 625
706 49 622 620 623 626
707 53 614 617 620 621
708 53 614 617 620 622
709 54 614 617 620 623
710 52 618 617 620 621
711 52 618 617 620 622
712 55 618 617 620 623
713 52 619 617 620 621
714 52 619 617 620 622
715 55 619 617 620 623
716 50 605 614 617 618
717 50 605 614 617 619
718 51 605 614 617 620
719 52 615 614 617 618
720 52 615 614 617 619
721 53 615 614 617 620
722 52 616 614 617 618
723 52 616 614 617 619
724 53 616 614 617 620
725 48 605 607 610 611
726 48 605 607 610 612
727 48 605 607 610 613
728 49 608 607 610 611
729 49 608 607 610 612
730 49 608 607 610 613
731 49 609 607 610 611
732 49 609 607 610 612
733 49 609 607 610 613
734 39 602 605 607 608
735 39 602 605 607 609
736 40 602 605 607 610
737 41 606 605 607 608
738 41 606 605 607 609
739 42 606 605 607 610
740 43 614 605 607 608
741 43 614 605 607 609
742 44 614 605 607 610
743 39 602 605 614 615
744 39 602 605 614 616
745 45 602 605 614 617
746 41 606 605 614 615
747 41 606 605 614 616
748 46 606 605 614 617
749 43 607 605 614 615
750 43 607 605 614 616
751 47 607 605 614 617
752 35 592 602 605 606
753 36 592 602 605 607
754 36 592 602 605 614
755 37 603 602 605 606
756 38 603 602 605 607
757 38 603 602 605 614
758 37 604 602 605 606
759 38 604 602 605 607
760 38 604 602 605 614
761 35 592 627 630 631
762 36 592 627 630 632
763 36 592 627 630 639
764 37 628 627 630 631
765 38 628 627 630 632
766 38 628 627 630 639
767 37 629 627 630 631
768 38 629 627 630 632
769 38 629 627 630 639
770 39 627 630 632 633
771 39 627 630 632 634
772 40 627 630 632 635
773 41 631 630 632 633
774 41 631 630 632 634
775 42 631 630 632 635
776 43 639 630 632 633
777 43 639 630 632 634
778 44 639 630 632 635
779 39 627 630 639 640
780 39 627 630 639 641
781 45 627 630 639 642
782 41 631 630 639 640
783 41 631 630 639 641
784 46 631 630 639 642
785 43 632 630 639 640
786 43 632 630 639 641
787 47 632 630 639 642
788 53 1155 1158 1161 1162
789 53 1155 1158 1161 1163
790 82 1155 1158 1161 1164
791 52 1159 1158 1161 1162
792 52 1159 1158 1161 1163
793 53 1159 1158 1161 1164
794 52 1160 1158 1161 1162
795 52 1160 1158 1161 1163
796 53 1160 1158 1161 1164
797 80 1152 1155 1158 1159
798 80 1152 1155 1158 1160
799 81 1152 1155 1158 1161
800 52 1156 1155 1158 1159
801 52 1156 1155 1158 1160
802 53 1156 1155 1158 1161
803 52 1157 1155 1158 1159
804 52 1157 1155 1158 1160
805 53 1157 1155 1158 1161
806 48 630 632 635 636
807 48 630 632 635 637
808 48 630 632 635 638
809 49 633 632 635 636
810 49 633 632 635 637
811 49 633 632 635 638
812 49 634 632 635 636
813 49 634 632 635 637
814 49 634 632 635 638
815 76 1146 1152 1155 1156
816 76 1146 1152 1155 1157
817 77 1146 1152 1155 1158
818 78 1153 1152 1155 1156
819 78 1153 1152 1155 1157
820 79 1153 1152 1155 1158
821 78 1154 1152 1155 1156
822 78 1154 1152 1155 1157
823 79 1154 1152 1155 1158
824 76 950 956 959 960
825 76 950 956 959 961
826 77 950 956 959 962
827 78 957 956 959 960
828 78 957 956 959 961
829 79 957 956 959 962
830 78 958 956 959 960
831 78 958 956 959 961
832 79 958 956 959 962
833 53 962 965 968 969
834 53 962 965 968 970
835 82 962 965 968 971
836 52 966 965 968 969
837 52 966 965 968 970
838 53 966 965 968 971
839 52 967 965 968 969
840 52 967 965 968 970
841 53 967 965 968 971
842 70 949 950 953 952
843 72 949 950 953 955
844 71 956 950 953 952
845 73 956 950 953 955
846 74 949 950 956 957
847 74 949 950 956 958
848 75 949 950 956 959
849 74 953 950 956 957
850 74 953 950 956 958
851 75 953 950 956 959
852 53 959 962 965 966
853 53 959 962 965 967
854 82 959 962 965 968
855 52 963 962 965 966
856 52 963 962 965 967
857 53 963 962 965 968
858 52 964 962 965 966
859 52 964 962 965 967
860 53 964 962 965 968
861 80 956 959 962 963
862 80 956 959 962 964
863 81 956 959 962 965
864 52 960 959 962 963
865 52 960 959 962 964
866 53 960 959 962 965
867 52 961 959 962 963
868 52 961 959 962 964
869 53 961 959 962 965
870 35 984 994 997 998
871 36 984 994 997 999
872 36 984 994 997 1006
873 37 995 994 997 998
874 38 995 994 997 999
875 38 995 994 997 1006
876 37 996 994 997 998
877 38 996 994 997 999
878 38 996 994 997 1006
879 39 1019 1022 1024 1025
880 39 1019 1022 1024 1026
881 40 1019 1022 1024 1027
882 41 1023 1022 1024 1025
883 41 1023 1022 1024 1026
884 42 1023 1022 1024 1027
885 43 1031 1022 1024 1025
886 43 1031 1022 1024 1026
887 44 1031 1022 1024 1027
888 39 1019 1022 1031 1032
889 39 1019 1022 1031 1033
890 45 1019 1022 1031 1034
891 41 1023 1022 1031 1032
892 41 1023 1022 1031 1033
893 46 1023 1022 1031 1034
894 43 1024 1022 1031 1032
895 43 1024 1022 1031 1033
896 47 1024 1022 1031 1034
897 48 1022 1024 1027 1028
898 48 1022 1024 1027 1029
899 48 1022 1024 1027 1030
900 49 1025 1024 1027 1028
901 49 1025 1024 1027 1029
902 49 1025 1024 1027 1030
903 49 1026 1024 1027 1028
904 49 1026 1024 1027 1029
905 49 1026 1024 1027 1030
906 35 984 1019 1022 1023
907 36 984 1019 1022 1024
908 36 984 1019 1022 1031
909 37 1020 1019 1022 1023
910 38 1020 1019 1022 1024
911 38 1020 1019 1022 1031
912 37 1021 1019 1022 1023
913 38 1021 1019 1022 1024
914 38 1021 1019 1022 1031
915 9 982 983 986 984
916 10 982 983 986 985
917 11 992 983 986 984
918 12 992 983 986 985
919 13 991 984 986 983
920 14 991 984 986 985
921 15 994 984 986 983
922 16 994 984 986 985
923 15 1019 984 986 983
924 16 1019 984 986 985
925 13 986 984 991 989
926 14 986 984 991 990
927 15 994 984 991 989
928 16 994 984 991 990
929 15 1019 984 991 989
930 16 1019 984 991 990
931 17 986 984 994 995
932 17 986 984 994 996
933 18 986 984 994 997
934 17 991 984 994 995
935 17 991 984 994 996
936 18 991 984 994 997
937 19 1019 984 994 995
938 19 1019 984 994 996
939 20 1019 984 994 997
940 17 986 984 1019 1020
941 17 986 984 1019 1021
942 18 986 984 1019 1022
943 17 991 984 1019 1020
944 17 991 984 1019 1021
945 18 991 984 1019 1022
946 19 994 984 1019 1020
947 19 994 984 1019 1021
948 20 994 984 1019 1022
949 21 981 985 986 983
950 22 981 985 986 984
951 23 990 985 986 983
952 24 990 985 986 984
953 25 981 985 990 987
954 26 981 985 990 991
955 26 986 985 990 987
956 27 986 985 990 991
957 24 985 990 991 984
958 23 985 990 991 989
959 22 987 990 991 984
960 21 987 990 991 989
961 39 994 997 999 1000
962 39 994 997 999 1001
963 40 994 997 999 1002
964 41 998 997 999 1000
965 41 998 997 999 1001
966 42 998 997 999 1002
967 43 1006 997 999 1000
968 43 1006 997 999 1001
969 44 1006 997 999 1002
970 39 994 997 1006 1007
971 39 994 997 1006 1008
972 45 994 997 1006 1009
973 41 998 997 1006 1007
974 41 998 997 1006 1008
975 46 998 997 1006 1009
976 43 999 997 1006 1007
977 43 999 997 1006 1008
978 47 999 997 1006 1009
979 50 630 639 642 643
980 50 630 639 642 644
981 51 630 639 642 645
982 52 640 639 642 643
983 52 640 639 642 644
984 53 640 639 642 645
985 52 641 639 642 643
986 52 641 639 642 644
987 53 641 639 642 645
988 9 988 989 991 984
989 10 988 989 991 990
990 11 993 989 991 984
991 12 993 989 991 990
992 48 997 999 1002 1003
993 48 997 999 1002 1004
994 48 997 999 1002 1005
995 49 1000 999 1002 1003
996 49 1000 999 1002 1004
997 49 1000 999 1002 1005
998 49 1001 999 1002 1003
999 49 1001 999 1002 1004
1000 49 1001 999 1002 1005
1001 5 987 988 989 991
1002 6 987 988 989 993
1003 29 1045 988 989 991
1004 30 1045 988 989 993
1005 31 987 988 1045 1044
1006 32 987 988 1045 1046
1007 33 989 988 1045 1044
1008 34 989 988 1045 1046
1009 53 639 642 645 646
1010 53 639 642 645 647
1011 54 639 642 645 648
1012 52 643 642 645 646
1013 52 643 642 645 647
1014 55 643 642 645 648
1015 52 644 642 645 646
1016 52 644 642 645 647
1017 55 644 642 645 648
1018 56 642 645 648 649
1019 56 642 645 648 650
1020 56 642 645 648 651
1021 49 646 645 648 649
1022 49 646 645 648 650
1023 49 646 645 648 651
1024 49 647 645 648 649
1025 49 647 645 648 650
1026 49 647 645 648 651
1027 48 899 901 904 905
1028 48 899 901 904 906
1029 48 899 901 904 907
1030 49 902 901 904 905
1031 49 902 901 904 906
1032 49 902 901 904 907
1033 49 903 901 904 905
1034 49 903 901 904 906
1035 49 903 901 904 907
1036 39 896 899 901 902
1037 39 896 899 901 903
1038 40 896 899 901 904
1039 41 900 899 901 902
1040 41 900 899 901 903
1041 42 900 899 901 904
1042 43 908 899 901 902
1043 43 908 899 901 903
1044 44 908 899 901 904
1045 39 896 899 908 909
1046 39 896 899 908 910
1047 45 896 899 908 911
1048 41 900 899 908 909
1049 41 900 899 908 910
1050 46 900 899 908 911
1051 43 901 899 908 909
1052 43 901 899 908 910
1053 47 901 899 908 911
1054 35 886 896 899 900
1055 36 886 896 899 901
1056 36 886 896 899 908
1057 37 897 896 899 900
1058 38 897 896 899 901
1059 38 897 896 899 908
1060 37 898 896 899 900
1061 38 898 896 899 901
1062 38 898 896 899 908
1063 50 899 908 911 912
1064 50 899 908 911 913
1065 51 899 908 911 914
1066 52 909 908 911 912
1067 52 909 908 911 913
1068 53 909 908 911 914
1069 52 910 908 911 912
1070 52 910 908 911 913
1071 53 910 908 911 914
1072 53 908 911 914 915
1073 53 908 911 914 916
1074 54 908 911 914 917
1075 52 912 911 914 915
1076 52 912 911 914 916
1077 55 912 911 914 917
1078 52 913 911 914 915
1079 52 913 911 914 916
1080 55 913 911 914 917
1081 70 948 949 950 953
1082 71 948 949 950 956
1083 72 954 949 950 953
1084 73 954 949 950 956
1085 65 948 952 953 950
1086 66 948 952 953 955
1087 63 951 952 953 950
1088 64 951 952 953 955
1089 13 893 886 888 885
1090 14 893 886 888 887
1091 15 896 886 888 885
1092 16 896 886 888 887
1093 15 921 886 888 885
1094 16 921 886 888 887
1095 13 888 886 893 891
1096 14 888 886 893 892
1097 15 896 886 893 891
1098 16 896 886 893 892
1099 15 921 886 893 891
1100 16 921 886 893 892
1101 17 888 886 896 897
1102 17 888 886 896 898
1103 18 888 886 896 899
1104 17 893 886 896 897
1105 17 893 886 896 898
1106 18 893 886 896 899
1107 19 921 886 896 897
1108 19 921 886 896 898
1109 20 921 886 896 899
1110 17 888 886 921 922
1111 17 888 886 921 923
1112 18 888 886 921 924
1113 17 893 886 921 922
1114 17 893 886 921 923
1115 18 893 886 921 924
1116 19 896 886 921 922
1117 19 896 886 921 923
1118 20 896 886 921 924
1119 63 947 948 949 950
1120 64 947 948 949 954
1121 65 952 948 949 950
1122 66 952 948 949 954
1123 67 947 948 952 951
1124 68 947 948 952 953
1125 68 949 948 952 951
1126 69 949 948 952 953
1127 59 890 947 948 949
1128 60 890 947 948 952
1129 61 946 947 948 949
1130 62 946 947 948 952
1131 5 889 890 891 893
1132 6 889 890 891 895
1133 29 947 890 891 893
1134 30 947 890 891 895
1135 31 889 890 947 946
1136 32 889 890 947 948
1137 33 891 890 947 946
1138 34 891 890 947 948
1139 1 892 889 890 891
1140 28 892 889 890 947
1141 4 890 889 892 887
1142 3 890 889 892 893
1143 9 890 891 893 886
1144 10 890 891 893 892
1145 11 895 891 893 886
1146 12 895 891 893 892
1147 21 883 887 888 885
1148 22 883 887 888 886
1149 23 892 887 888 885
1150 24 892 887 888 886
1151 25 883 887 892 889
1152 26 883 887 892 893
1153 26 888 887 892 889
1154 27 888 887 892 893
1155 24 887 892 893 886
1156 23 887 892 893 891
1157 22 889 892 893 886
1158 21 889 892 893 891
1159 29 951 982 983 986
1160 30 951 982 983 992
1161 5 981 982 983 986
1162 6 981 982 983 992
1163 57 951 946 947 890
1164 58 951 946 947 948
1165 58 947 946 951 952
1166 57 947 946 951 982
1167 62 946 951 952 948
1168 61 946 951 952 953
1169 60 982 951 952 948
1170 59 982 951 952 953
1171 31 946 951 982 981
1172 33 946 951 982 983
1173 32 952 951 982 981
1174 34 952 951 982 983
1175 28 985 981 982 951
1176 1 985 981 982 983
1177 3 982 981 985 986
1178 4 982 981 985 990
1179 35 4 39 42 43
1180 36 4 39 42 44
1181 36 4 39 42 51
1182 37 40 39 42 43
1183 38 40 39 42 44
1184 38 40 39 42 51
1185 37 41 39 42 43
1186 38 41 39 42 44
1187 38 41 39 42 51
1188 1 990 987 988 989
1189 28 990 987 988 1045
1190 4 988 987 990 985
1191 3 988 987 990 991
1192 48 42 44 47 48
1193 48 42 44 47 49
1194 48 42 44 47 50
1195 49 45 44 47 48
1196 49 45 44 47 49
1197 49 45 44 47 50
1198 49 46 44 47 48
1199 49 46 44 47 49
1200 49 46 44 47 50
1201 50 17 26 29 30
1202 50 17 26 29 31
1203 51 17 26 29 32
1204 52 27 26 29 30
1205 52 27 26 29 31
1206 53 27 26 29 32
1207 52 28 26 29 30
1208 52 28 26 29 31
1209 53 28 26 29 32
1210 48 17 19 22 23
1211 48 17 19 22 24
1212 48 17 19 22 25
1213 49 20 19 22 23
1214 49 20 19 22 24
1215 49 20 19 22 25
1216 49 21 19 22 23
1217 49 21 19 22 24
1218 49 21 19 22 25
1219 39 14 17 19 20
1220 39 14 17 19 21
1221 40 14 17 19 22
1222 41 18 17 19 20
1223 41 18 17 19 21
1224 42 18 17 19 22
1225 43 26 17 19 20
1226 43 26 17 19 21
1227 44 26 17 19 22
1228 39 14 17 26 27
1229 39 14 17 26 28
1230 45 14 17 26 29
1231 41 18 17 26 27
1232 41 18 17 26 28
1233 46 18 17 26 29
1234 43 19 17 26 27
1235 43 19 17 26 28
1236 47 19 17 26 29
1237 56 29 32 35 36
1238 56 29 32 35 37
1239 56 29 32 35 38
1240 49 33 32 35 36
1241 49 33 32 35 37
1242 49 33 32 35 38
1243 49 34 32 35 36
1244 49 34 32 35 37
1245 49 34 32 35 38
1246 53 26 29 32 33
1247 53 26 29 32 34
1248 54 26 29 32 35
1249 52 30 29 32 33
1250 52 30 29 32 34
1251 55 30 29 32 35
1252 52 31 29 32 33
1253 52 31 29 32 34
1254 55 31 29 32 35
1255 56 911 914 917 918
1256 56 911 914 917 919
1257 56 911 914 917 920
1258 49 915 914 917 918
1259 49 915 914 917 919
1260 49 915 914 917 920
1261 49 916 914 917 918
1262 49 916 914 917 919
1263 49 916 914 917 920
1264 39 39 42 44 45
1265 39 39 42 44 46
1266 40 39 42 44 47
1267 41 43 42 44 45
1268 41 43 42 44 46
1269 42 43 42 44 47
1270 43 51 42 44 45
1271 43 51 42 44 46
1272 44 51 42 44 47
1273 39 39 42 51 52
1274 39 39 42 51 53
1275 45 39 42 51 54
1276 41 43 42 51 52
1277 41 43 42 51 53
1278 46 43 42 51 54
1279 43 44 42 51 52
1280 43 44 42 51 53
1281 47 44 42 51 54
1282 50 42 51 54 55
1283 50 42 51 54 56
1284 51 42 51 54 57
1285 52 52 51 54 55
1286 52 52 51 54 56
1287 53 52 51 54 57
1288 52 53 51 54 55
1289 52 53 51 54 56
1290 53 53 51 54 57
1291 53 51 54 57 58
1292 53 51 54 57 59
1293 54 51 54 57 60
1294 52 55 54 57 58
1295 52 55 54 57 59
1296 55 55 54 57 60
1297 52 56 54 57 58
1298 52 56 54 57 59
1299 55 56 54 57 60
1300 56 54 57 60 61
1301 56 54 57 60 62
1302 56 54 57 60 63
1303 49 58 57 60 61
1304 49 58 57 60 62
1305 49 58 57 60 63
1306 49 59 57 60 61
1307 49 59 57 60 62
1308 49 59 57 60 63
1309 50 311 320 323 324
1310 50 311 320 323 325
1311 51 311 320 323 326
1312 52 321 320 323 324
1313 52 321 320 323 325
1314 53 321 320 323 326
1315 52 322 320 323 324
1316 52 322 320 323 325
1317 53 322 320 323 326
1318 56 323 326 329 330
1319 56 323 326 329 331
1320 56 323 326 329 332
1321 49 327 326 329 330
1322 49 327 326 329 331
1323 49 327 326 329 332
1324 49 328 326 329 330
1325 49 328 326 329 331
1326 49 328 326 329 332
1327 39 308 311 313 314
1328 39 308 311 313 315
1329 40 308 311 313 316
1330 41 312 311 313 314
1331 41 312 311 313 315
1332 42 312 311 313 316
1333 43 320 311 313 314
1334 43 320 311 313 315
1335 44 320 311 313 316
1336 39 308 311 320 321
1337 39 308 311 320 322
1338 45 308 311 320 323
1339 41 312 311 320 321
1340 41 312 311 320 322
1341 46 312 311 320 323
1342 43 313 311 320 321
1343 43 313 311 320 322
1344 47 313 311 320 323
1345 35 298 308 311 312
1346 36 298 308 311 313
1347 36 298 308 311 320
1348 37 309 308 311 312
1349 38 309 308 311 313
1350 38 309 308 311 320
1351 37 310 308 311 312
1352 38 310 308 311 313
1353 38 310 308 311 320
1354 13 305 298 300 297
1355 14 305 298 300 299
1356 15 308 298 300 297
1357 16 308 298 300 299
1358 15 333 298 300 297
1359 16 333 298 300 299
1360 13 300 298 305 303
1361 14 300 298 305 304
1362 15 308 298 305 303
1363 16 308 298 305 304
1364 15 333 298 305 303
1365 16 333 298 305 304
1366 17 300 298 308 309
1367 17 300 298 308 310
1368 18 300 298 308 311
1369 17 305 298 308 309
1370 17 305 298 308 310
1371 18 305 298 308 311
1372 19 333 298 308 309
1373 19 333 298 308 310
1374 20 333 298 308 311
1375 17 300 298 333 334
1376 17 300 298 333 335
1377 18 300 298 333 336
1378 17 305 298 333 334
1379 17 305 298 333 335
1380 18 305 298 333 336
1381 19 308 298 333 334
1382 19 308 298 333 335
1383 20 308 298 333 336
1384 35 298 333 336 337
1385 36 298 333 336 338
1386 36 298 333 336 345
1387 37 334 333 336 337
1388 38 334 333 336 338
1389 38 334 333 336 345
1390 37 335 333 336 337
1391 38 335 333 336 338
1392 38 335 333 336 345
1393 48 336 338 341 342
1394 48 336 338 341 343
1395 48 336 338 341 344
1396 49 339 338 341 342
1397 49 339 338 341 343
1398 49 339 338 341 344
1399 49 340 338 341 342
1400 49 340 338 341 343
1401 49 340 338 341 344
1402 53 320 323 326 327
1403 53 320 323 326 328
1404 54 320 323 326 329
1405 52 324 323 326 327
1406 52 324 323 326 328
1407 55 324 323 326 329
1408 52 325 323 326 327
1409 52 325 323 326 328
1410 55 325 323 326 329
1411 56 348 351 354 355
1412 56 348 351 354 356
1413 56 348 351 354 357
1414 49 352 351 354 355
1415 49 352 351 354 356
1416 49 352 351 354 357
1417 49 353 351 354 355
1418 49 353 351 354 356
1419 49 353 351 354 357
1420 53 345 348 351 352
1421 53 345 348 351 353
1422 54 345 348 351 354
1423 52 349 348 351 352
1424 52 349 348 351 353
1425 55 349 348 351 354
1426 52 350 348 351 352
1427 52 350 348 351 353
1428 55 350 348 351 354
1429 53 478 481 484 485
1430 53 478 481 484 486
1431 54 478 481 484 487
1432 52 482 481 484 485
1433 52 482 481 484 486
1434 55 482 481 484 487
1435 52 483 481 484 485
1436 52 483 481 484 486
1437 55 483 481 484 487
1438 56 481 484 487 488
1439 56 481 484 487 489
1440 56 481 484 487 490
1441 49 485 484 487 488
1442 49 485 484 487 489
1443 49 485 484 487 490
1444 49 486 484 487 488
1445 49 486 484 487 489
1446 49 486 484 487 490
1447 53 475 478 481 482
1448 53 475 478 481 483
1449 82 475 478 481 484
1450 52 479 478 481 482
1451 52 479 478 481 483
1452 53 479 478 481 484
1453 52 480 478 481 482
1454 52 480 478 481 483
1455 53 480 478 481 484
1456 9 296 297 300 298
1457 10 296 297 300 299
1458 11 306 297 300 298
1459 12 306 297 300 299
1460 62 260 265 266 262
1461 61 260 265 266 267
1462 60 296 265 266 262
1463 59 296 265 266 267
1464 31 260 265 296 295
1465 33 260 265 296 297
1466 32 266 265 296 295
1467 34 266 265 296 297
1468 57 265 260 261 204
1469 58 265 260 261 262
1470 58 261 260 265 266
1471 57 261 260 265 296
1472 28 299 295 296 265
1473 1 299 295 296 297
1474 3 296 295 299 300
1475 4 296 295 299 304
1476 29 265 296 297 300
1477 30 265 296 297 306
1478 5 295 296 297 300
1479 6 295 296 297 306
1480 65 262 266 267 264
1481 66 262 266 267 269
1482 63 265 266 267 264
1483 64 265 266 267 269
1484 59 204 261 262 263
1485 60 204 261 262 266
1486 61 260 261 262 263
1487 62 260 261 262 266
1488 63 261 262 263 264
1489 64 261 262 263 268
1490 65 266 262 263 264
1491 66 266 262 263 268
1492 67 261 262 266 265
1493 68 261 262 266 267
1494 68 263 262 266 265
1495 69 263 262 266 267
1496 50 532 541 544 545
1497 50 532 541 544 546
1498 51 532 541 544 547
1499 52 542 541 544 545
1500 52 542 541 544 546
1501 53 542 541 544 547
1502 52 543 541 544 545
1503 52 543 541 544 546
1504 53 543 541 544 547
1505 48 532 534 537 538
1506 48 532 534 537 539
1507 48 532 534 537 540
1508 49 535 534 537 538
1509 49 535 534 537 539
1510 49 535 534 537 540
1511 49 536 534 537 538
1512 49 536 534 537 539
1513 49 536 534 537 540
1514 53 541 544 547 548
1515 53 541 544 547 549
1516 54 541 544 547 550
1517 52 545 544 547 548
1518 52 545 544 547 549
1519 55 545 544 547 550
1520 52 546 544 547 548
1521 52 546 544 547 549
1522 55 546 544 547 550
1523 56 544 547 550 551
1524 56 544 547 550 552
1525 56 544 547 550 553
1526 49 548 547 550 551
1527 49 548 547 550 552
1528 49 548 547 550 553
1529 49 549 547 550 551
1530 49 549 547 550 552
1531 49 549 547 550 553
1532 28 201 197 198 167
1533 1 201 197 198 199
1534 3 198 197 201 202
1535 4 198 197 201 206
1536 1 206 203 204 205
1537 28 206 203 204 261
1538 4 204 203 206 201
1539 3 204 203 206 207
1540 53 247 250 253 254
1541 53 247 250 253 255
1542 54 247 250 253 256
1543 52 251 250 253 254
1544 52 251 250 253 255
1545 55 251 250 253 256
1546 52 252 250 253 254
1547 52 252 250 253 255
1548 55 252 250 253 256
1549 56 250 253 256 257
1550 56 250 253 256 258
1551 56 250 253 256 259
1552 49 254 253 256 257
1553 49 254 253 256 258
1554 49 254 253 256 259
1555 49 255 253 256 257
1556 49 255 253 256 258
1557 49 255 253 256 259
1558 50 238 247 250 251
1559 50 238 247 250 252
1560 51 238 247 250 253
1561 52 248 247 250 251
1562 52 248 247 250 252
1563 53 248 247 250 253
1564 52 249 247 250 251
1565 52 249 247 250 252
1566 53 249 247 250 253
1567 5 203 204 205 207
1568 6 203 204 205 209
1569 29 261 204 205 207
1570 30 261 204 205 209
1571 31 203 204 261 260
1572 32 203 204 261 262
1573 33 205 204 261 260
1574 34 205 204 261 262
1575 24 201 206 207 200
1576 23 201 206 207 205
1577 22 203 206 207 200
1578 21 203 206 207 205
1579 21 197 201 202 199
1580 22 197 201 202 200
1581 23 206 201 202 199
1582 24 206 201 202 200
1583 25 197 201 206 203
1584 26 197 201 206 207
1585 26 202 201 206 203
1586 27 202 201 206 207
1587 39 235 238 240 241
1588 39 235 238 240 242
1589 40 235 238 240 243
1590 41 239 238 240 241
1591 41 239 238 240 242
1592 42 239 238 240 243
1593 43 247 238 240 241
1594 43 247 238 240 242
1595 44 247 238 240 243
1596 39 235 238 247 248
1597 39 235 238 247 249
1598 45 235 238 247 250
1599 41 239 238 247 248
1600 41 239 238 247 249
1601 46 239 238 247 250
1602 43 240 238 247 248
1603 43 240 238 247 249
1604 47 240 238 247 250
1605 9 204 205 207 200
1606 10 204 205 207 206
1607 11 209 205 207 200
1608 12 209 205 207 206
1609 56 285 288 291 292
1610 56 285 288 291 293
1611 56 285 288 291 294
1612 49 289 288 291 292
1613 49 289 288 291 293
1614 49 289 288 291 294
1615 49 290 288 291 292
1616 49 290 288 291 293
1617 49 290 288 291 294
1618 1 500 497 498 499
1619 28 500 497 498 555
1620 4 498 497 500 495
1621 3 498 497 500 501
1622 5 497 498 499 501
1623 6 497 498 499 503
1624 29 555 498 499 501
1625 30 555 498 499 503
1626 31 497 498 555 554
1627 32 497 498 555 556
1628 33 499 498 555 554
1629 34 499 498 555 556
1630 24 495 500 501 494
1631 23 495 500 501 499
1632 22 497 500 501 494
1633 21 497 500 501 499
1634 9 498 499 501 494
1635 10 498 499 501 500
1636 11 503 499 501 494
1637 12 503 499 501 500
1638 59 498 555 556 557
1639 60 498 555 556 560
1640 61 554 555 556 557
1641 62 554 555 556 560
1642 63 555 556 557 558
1643 64 555 556 557 562
1644 65 560 556 557 558
1645 66 560 556 557 562
1646 67 555 556 560 559
1647 68 555 556 560 561
1648 68 557 556 560 559
1649 69 557 556 560 561
1650 70 556 557 558 561
1651 71 556 557 558 564
1652 72 562 557 558 561
1653 73 562 557 558 564
1654 53 282 285 288 289
1655 53 282 285 288 290
1656 54 282 285 288 291
1657 52 286 285 288 289
1658 52 286 285 288 290
1659 55 286 285 288 291
1660 52 287 285 288 289
1661 52 287 285 288 290
1662 55 287 285 288 291
1663 48 238 240 243 244
1664 48 238 240 243 245
1665 48 238 240 243 246
1666 49 241 240 243 244
1667 49 241 240 243 245
1668 49 241 240 243 246
1669 49 242 240 243 244
1670 49 242 240 243 245
1671 49 242 240 243 246
1672 35 494 504 507 508
1673 36 494 504 507 509
1674 36 494 504 507 516
1675 37 505 504 507 508
1676 38 505 504 507 509
1677 38 505 504 507 516
1678 37 506 504 507 508
1679 38 506 504 507 509
1680 38 506 504 507 516
1681 13 501 494 496 493
1682 14 501 494 496 495
1683 15 504 494 496 493
1684 16 504 494 496 495
1685 15 529 494 496 493
1686 16 529 494 496 495
1687 13 496 494 501 499
1688 14 496 494 501 500
1689 15 504 494 501 499
1690 16 504 494 501 500
1691 15 529 494 501 499
1692 16 529 494 501 500
1693 17 496 494 504 505
1694 17 496 494 504 506
1695 18 496 494 504 507
1696 17 501 494 504 505
1697 17 501 494 504 506
1698 18 501 494 504 507
1699 19 529 494 504 505
1700 19 529 494 504 506
1701 20 529 494 504 507
1702 17 496 494 529 530
1703 17 496 494 529 531
1704 18 496 494 529 532
1705 17 501 494 529 530
1706 17 501 494 529 531
1707 18 501 494 529 532
1708 19 504 494 529 530
1709 19 504 494 529 531
1710 20 504 494 529 532
1711 35 494 529 532 533
1712 36 494 529 532 534
1713 36 494 529 532 541
1714 37 530 529 532 533
1715 38 530 529 532 534
1716 38 530 529 532 541
1717 37 531 529 532 533
1718 38 531 529 532 534
1719 38 531 529 532 541
1720 39 529 532 534 535
1721 39 529 532 534 536
1722 40 529 532 534 537
1723 41 533 532 534 535
1724 41 533 532 534 536
1725 42 533 532 534 537
1726 43 541 532 534 535
1727 43 541 532 534 536
1728 44 541 532 534 537
1729 39 529 532 541 542
1730 39 529 532 541 543
1731 45 529 532 541 544
1732 41 533 532 541 542
1733 41 533 532 541 543
1734 46 533 532 541 544
1735 43 534 532 541 542
1736 43 534 532 541 543
1737 47 534 532 541 544
1738 70 165 166 169 168
1739 72 165 166 169 171
1740 71 172 166 169 168
1741 73 172 166 169 171
1742 74 165 166 172 173
1743 74 165 166 172 174
1744 75 165 166 172 175
1745 74 169 166 172 173
1746 74 169 166 172 174
1747 75 169 166 172 175
1748 70 164 165 166 169
1749 71 164 165 166 172
1750 72 170 165 166 169
1751 73 170 165 166 172
1752 5 105 106 107 109
1753 6 105 106 107 111
1754 29 163 106 107 109
1755 30 163 106 107 111
1756 31 105 106 163 162
1757 32 105 106 163 164
1758 33 107 106 163 162
1759 34 107 106 163 164
1760 63 163 164 165 166
1761 64 163 164 165 170
1762 65 168 164 165 166
1763 66 168 164 165 170
1764 67 163 164 168 167
1765 68 163 164 168 169
1766 68 165 164 168 167
1767 69 165 164 168 169
1768 59 106 163 164 165
1769 60 106 163 164 168
1770 61 162 163 164 165
1771 62 162 163 164 168
1772 65 164 168 169 166
1773 66 164 168 169 171
1774 63 167 168 169 166
1775 64 167 168 169 171
1776 62 162 167 168 164
1777 61 162 167 168 169
1778 60 198 167 168 164
1779 59 198 167 168 169
1780 31 162 167 198 197
1781 33 162 167 198 199
1782 32 168 167 198 197
1783 34 168 167 198 199
1784 29 167 198 199 202
1785 30 167 198 199 208
1786 5 197 198 199 202
1787 6 197 198 199 208
1788 57 167 162 163 106
1789 58 167 162 163 164
1790 58 163 162 167 168
1791 57 163 162 167 198
1792 13 599 592 594 591
1793 14 599 592 594 593
1794 15 602 592 594 591
1795 16 602 592 594 593
1796 15 627 592 594 591
1797 16 627 592 594 593
1798 13 594 592 599 597
1799 14 594 592 599 598
1800 15 602 592 599 597
1801 16 602 592 599 598
1802 15 627 592 599 597
1803 16 627 592 599 598
1804 17 594 592 602 603
1805 17 594 592 602 604
1806 18 594 592 602 605
1807 17 599 592 602 603
1808 17 599 592 602 604
1809 18 599 592 602 605
1810 19 627 592 602 603
1811 19 627 592 602 604
1812 20 627 592 602 605
1813 17 594 592 627 628
1814 17 594 592 627 629
1815 18 594 592 627 630
1816 17 599 592 627 628
1817 17 599 592 627 629
1818 18 599 592 627 630
1819 19 602 592 627 628
1820 19 602 592 627 629
1821 20 602 592 627 630
1822 24 593 598 599 592
1823 23 593 598 599 597
1824 22 595 598 599 592
1825 21 595 598 599 597
1826 1 598 595 596 597
1827 28 598 595 596 653
1828 4 596 595 598 593
1829 3 596 595 598 599
1830 21 589 593 594 591
1831 22 589 593 594 592
1832 23 598 593 594 591
1833 24 598 593 594 592
1834 25 589 593 598 595
1835 26 589 593 598 599
1836 26 594 593 598 595
1837 27 594 593 598 599
1838 28 593 589 590 559
1839 1 593 589 590 591
1840 3 590 589 593 594
1841 4 590 589 593 598
1842 9 198 199 202 200
1843 10 198 199 202 201
1844 11 208 199 202 200
1845 12 208 199 202 201
1846 57 559 554 555 498
1847 58 559 554 555 556
1848 58 555 554 559 560
1849 57 555 554 559 590
1850 70 1145 1146 1149 1148
1851 72 1145 1146 1149 1151
1852 71 1152 1146 1149 1148
1853 73 1152 1146 1149 1151
1854 74 1145 1146 1152 1153
1855 74 1145 1146 1152 1154
1856 75 1145 1146 1152 1155
1857 74 1149 1146 1152 1153
1858 74 1149 1146 1152 1154
1859 75 1149 1146 1152 1155
1860 70 1144 1145 1146 1149
1861 71 1144 1145 1146 1152
1862 72 1150 1145 1146 1149
1863 73 1150 1145 1146 1152
1864 62 554 559 560 556
1865 61 554 559 560 561
1866 60 590 559 560 556
1867 59 590 559 560 561
1868 31 554 559 590 589
1869 33 554 559 590 591
1870 32 560 559 590 589
1871 34 560 559 590 591
1872 65 556 560 561 558
1873 66 556 560 561 563
1874 63 559 560 561 558
1875 64 559 560 561 563
1876 1 1088 1085 1086 1087
1877 28 1088 1085 1086 1143
1878 4 1086 1085 1088 1083
1879 3 1086 1085 1088 1089
1880 9 590 591 594 592
1881 10 590 591 594 593
1882 11 600 591 594 592
1883 12 600 591 594 593
1884 29 559 590 591 594
1885 30 559 590 591 600
1886 5 589 590 591 594
1887 6 589 590 591 600
1888 9 1086 1087 1089 1082
1889 10 1086 1087 1089 1088
1890 11 1091 1087 1089 1082
1891 12 1091 1087 1089 1088
1892 5 1085 1086 1087 1089
1893 6 1085 1086 1087 1091
1894 29 1143 1086 1087 1089
1895 30 1143 1086 1087 1091
1896 31 1085 1086 1143 1142
1897 32 1085 1086 1143 1144
1898 33 1087 1086 1143 1142
1899 34 1087 1086 1143 1144
1900 59 1086 1143 1144 1145
1901 60 1086 1143 1144 1148
1902 61 1142 1143 1144 1145
1903 62 1142 1143 1144 1148
1904 63 1143 1144 1145 1146
1905 64 1143 1144 1145 1150
1906 65 1148 1144 1145 1146
1907 66 1148 1144 1145 1150
1908 67 1143 1144 1148 1147
1909 68 1143 1144 1148 1149
1910 68 1145 1144 1148 1147
1911 69 1145 1144 1148 1149
1912 57 1147 1142 1143 1086
1913 58 1147 1142 1143 1144
1914 58 1143 1142 1147 1148
1915 83 1143 1142 1147 1178
1916 65 1144 1148 1149 1146
1917 66 1144 1148 1149 1151
1918 63 1147 1148 1149 1146
1919 64 1147 1148 1149 1151
1920 62 1142 1147 1148 1144
1921 61 1142 1147 1148 1149
1922 84 1178 1147 1148 1144
1923 85 1178 1147 1148 1149
1924 70 557 558 561 560
1925 72 557 558 561 563
1926 71 564 558 561 560
1927 73 564 558 561 563
1928 74 557 558 564 565
1929 74 557 558 564 566
1930 75 557 558 564 567
1931 74 561 558 564 565
1932 74 561 558 564 566
1933 75 561 558 564 567
1934 53 665 668 671 672
1935 53 665 668 671 673
1936 82 665 668 671 674
1937 52 669 668 671 672
1938 52 669 668 671 673
1939 53 669 668 671 674
1940 52 670 668 671 672
1941 52 670 668 671 673
1942 53 670 668 671 674
1943 76 656 662 665 666
1944 76 656 662 665 667
1945 77 656 662 665 668
1946 78 663 662 665 666
1947 78 663 662 665 667
1948 79 663 662 665 668
1949 78 664 662 665 666
1950 78 664 662 665 667
1951 79 664 662 665 668
1952 80 662 665 668 669
1953 80 662 665 668 670
1954 81 662 665 668 671
1955 52 666 665 668 669
1956 52 666 665 668 670
1957 53 666 665 668 671
1958 52 667 665 668 669
1959 52 667 665 668 670
1960 53 667 665 668 671
1961 70 655 656 659 658
1962 72 655 656 659 661
1963 71 662 656 659 658
1964 73 662 656 659 661
1965 74 655 656 662 663
1966 74 655 656 662 664
1967 75 655 656 662 665
1968 74 659 656 662 663
1969 74 659 656 662 664
1970 75 659 656 662 665
1971 70 654 655 656 659
1972 71 654 655 656 662
1973 72 660 655 656 659
1974 73 660 655 656 662
1975 1 108 105 106 107
1976 28 108 105 106 163
1977 4 106 105 108 103
1978 3 106 105 108 109
1979 28 103 99 100 69
1980 1 103 99 100 101
1981 3 100 99 103 104
1982 4 100 99 103 108
1983 29 69 100 101 104
1984 30 69 100 101 110
1985 5 99 100 101 104
1986 6 99 100 101 110
1987 21 99 103 104 101
1988 22 99 103 104 102
1989 23 108 103 104 101
1990 24 108 103 104 102
1991 25 99 103 108 105
1992 26 99 103 108 109
1993 26 104 103 108 105
1994 27 104 103 108 109
1995 24 103 108 109 102
1996 23 103 108 109 107
1997 22 105 108 109 102
1998 21 105 108 109 107
1999 65 654 658 659 656
2000 66 654 658 659 661
2001 63 657 658 659 656
2002 64 657 658 659 661
2003 9 596 597 599 592
2004 10 596 597 599 598
2005 11 601 597 599 592
2006 12 601 597 599 598
2007 57 1049 1044 1045 988
2008 58 1049 1044 1045 1046
2009 58 1045 1044 1049 1050
2010 57 1045 1044 1049 1080
2011 59 988 1045 1046 1047
2012 60 988 1045 1046 1050
2013 61 1044 1045 1046 1047
2014 62 1044 1045 1046 1050
2015 5 595 596 597 599
2016 6 595 596 597 601
2017 29 653 596 597 599
2018 30 653 596 597 601
2019 31 595 596 653 652
2020 32 595 596 653 654
2021 33 597 596 653 652
2022 34 597 596 653 654
2023 63 1045 1046 1047 1048
2024 64 1045 1046 1047 1052
2025 65 1050 1046 1047 1048
2026 66 1050 1046 1047 1052
2027 67 1045 1046 1050 1049
2028 68 1045 1046 1050 1051
2029 68 1047 1046 1050 1049
2030 69 1047 1046 1050 1051
2031 62 1044 1049 1050 1046
2032 61 1044 1049 1050 1051
2033 60 1080 1049 1050 1046
2034 59 1080 1049 1050 1051
2035 31 1044 1049 1080 1079
2036 33 1044 1049 1080 1081
2037 32 1050 1049 1080 1079
2038 34 1050 1049 1080 1081
2039 28 1083 1079 1080 1049
2040 1 1083 1079 1080 1081
2041 3 1080 1079 1083 1084
2042 4 1080 1079 1083 1088
2043 59 596 653 654 655
2044 60 596 653 654 658
2045 61 652 653 654 655
2046 62 652 653 654 658
2047 65 1046 1050 1051 1048
2048 66 1046 1050 1051 1053
2049 63 1049 1050 1051 1048
2050 64 1049 1050 1051 1053
2051 29 1049 1080 1081 1084
2052 30 1049 1080 1081 1090
2053 5 1079 1080 1081 1084
2054 6 1079 1080 1081 1090
2055 63 653 654 655 656
2056 64 653 654 655 660
2057 65 658 654 655 656
2058 66 658 654 655 660
2059 67 653 654 658 657
2060 68 653 654 658 659
2061 68 655 654 658 657
2062 69 655 654 658 659
2063 62 652 657 658 654
2064 61 652 657 658 659
2065 60 688 657 658 654
2066 59 688 657 658 659
2067 31 652 657 688 687
2068 33 652 657 688 689
2069 32 658 657 688 687
2070 34 658 657 688 689
2071 57 657 652 653 596
2072 58 657 652 653 654
2073 58 653 652 657 658
2074 57 653 652 657 688
2075 9 1080 1081 1084 1082
2076 10 1080 1081 1084 1083
2077 11 1090 1081 1084 1082
2078 12 1090 1081 1084 1083
2079 21 1079 1083 1084 1081
2080 22 1079 1083 1084 1082
2081 23 1088 1083 1084 1081
2082 24 1088 1083 1084 1082
2083 25 1079 1083 1088 1085
2084 26 1079 1083 1088 1089
2085 26 1084 1083 1088 1085
2086 27 1084 1083 1088 1089
2087 24 1083 1088 1089 1082
2088 23 1083 1088 1089 1087
2089 22 1085 1088 1089 1082
2090 21 1085 1088 1089 1087
2091 56 89 92 95 96
2092 56 89 92 95 97
2093 56 89 92 95 98
2094 49 93 92 95 96
2095 49 93 92 95 97
2096 49 93 92 95 98
2097 49 94 92 95 96
2098 49 94 92 95 97
2099 49 94 92 95 98
2100 48 924 926 929 930
2101 48 924 926 929 931
2102 48 924 926 929 932
2103 49 927 926 929 930
2104 49 927 926 929 931
2105 49 927 926 929 932
2106 49 928 926 929 930
2107 49 928 926 929 931
2108 49 928 926 929 932
2109 53 86 89 92 93
2110 53 86 89 92 94
2111 54 86 89 92 95
2112 52 90 89 92 93
2113 52 90 89 92 94
2114 55 90 89 92 95
2115 52 91 89 92 93
2116 52 91 89 92 94
2117 55 91 89 92 95
2118 56 677 680 683 684
2119 56 677 680 683 685
2120 56 677 680 683 686
2121 49 681 680 683 684
2122 49 681 680 683 685
2123 49 681 680 683 686
2124 49 682 680 683 684
2125 49 682 680 683 685
2126 49 682 680 683 686
2127 50 924 933 936 937
2128 50 924 933 936 938
2129 51 924 933 936 939
2130 52 934 933 936 937
2131 52 934 933 936 938
2132 53 934 933 936 939
2133 52 935 933 936 937
2134 52 935 933 936 938
2135 53 935 933 936 939
2136 56 936 939 942 943
2137 56 936 939 942 944
2138 56 936 939 942 945
2139 49 940 939 942 943
2140 49 940 939 942 944
2141 49 940 939 942 945
2142 49 941 939 942 943
2143 49 941 939 942 944
2144 49 941 939 942 945
2145 39 921 924 926 927
2146 39 921 924 926 928
2147 40 921 924 926 929
2148 41 925 924 926 927
2149 41 925 924 926 928
2150 42 925 924 926 929
2151 43 933 924 926 927
2152 43 933 924 926 928
2153 44 933 924 926 929
2154 39 921 924 933 934
2155 39 921 924 933 935
2156 45 921 924 933 936
2157 41 925 924 933 934
2158 41 925 924 933 935
2159 46 925 924 933 936
2160 43 926 924 933 934
2161 43 926 924 933 935
2162 47 926 924 933 936
2163 53 933 936 939 940
2164 53 933 936 939 941
2165 54 933 936 939 942
2166 52 937 936 939 940
2167 52 937 936 939 941
2168 55 937 936 939 942
2169 52 938 936 939 940
2170 52 938 936 939 941
2171 55 938 936 939 942
2172 35 886 921 924 925
2173 36 886 921 924 926
2174 36 886 921 924 933
2175 37 922 921 924 925
2176 38 922 921 924 926
2177 38 922 921 924 933
2178 37 923 921 924 925
2179 38 923 921 924 926
2180 38 923 921 924 933
2181 13 11 4 6 3
2182 14 11 4 6 5
2183 15 14 4 6 3
2184 16 14 4 6 5
2185 15 39 4 6 3
2186 16 39 4 6 5
2187 13 6 4 11 9
2188 14 6 4 11 10
2189 15 14 4 11 9
2190 16 14 4 11 10
2191 15 39 4 11 9
2192 16 39 4 11 10
2193 17 6 4 14 15
2194 17 6 4 14 16
2195 18 6 4 14 17
2196 17 11 4 14 15
2197 17 11 4 14 16
2198 18 11 4 14 17
2199 19 39 4 14 15
2200 19 39 4 14 16
2201 20 39 4 14 17
2202 17 6 4 39 40
2203 17 6 4 39 41
2204 18 6 4 39 42
2205 17 11 4 39 40
2206 17 11 4 39 41
2207 18 11 4 39 42
2208 19 14 4 39 40
2209 19 14 4 39 41
2210 20 14 4 39 42
2211 53 668 671 674 675
2212 53 668 671 674 676
2213 82 668 671 674 677
2214 52 672 671 674 675
2215 52 672 671 674 676
2216 53 672 671 674 677
2217 52 673 671 674 675
2218 52 673 671 674 676
2219 53 673 671 674 677
2220 53 671 674 677 678
2221 53 671 674 677 679
2222 82 671 674 677 680
2223 52 675 674 677 678
2224 52 675 674 677 679
2225 53 675 674 677 680
2226 52 676 674 677 678
2227 52 676 674 677 679
2228 53 676 674 677 680
2229 53 674 677 680 681
2230 53 674 677 680 682
2231 54 674 677 680 683
2232 52 678 677 680 681
2233 52 678 677 680 682
2234 55 678 677 680 683
2235 52 679 677 680 681
2236 52 679 677 680 682
2237 55 679 677 680 683
2238 9 8 9 11 4
2239 10 8 9 11 10
2240 11 13 9 11 4
2241 12 13 9 11 10
2242 62 64 69 70 66
2243 61 64 69 70 71
2244 60 100 69 70 66
2245 59 100 69 70 71
2246 31 64 69 100 99
2247 33 64 69 100 101
2248 32 70 69 100 99
2249 34 70 69 100 101
2250 5 7 8 9 11
2251 6 7 8 9 13
2252 29 65 8 9 11
2253 30 65 8 9 13
2254 31 7 8 65 64
2255 32 7 8 65 66
2256 33 9 8 65 64
2257 34 9 8 65 66
2258 1 10 7 8 9
2259 28 10 7 8 65
2260 4 8 7 10 5
2261 3 8 7 10 11
2262 63 65 66 67 68
2263 64 65 66 67 72
2264 65 70 66 67 68
2265 66 70 66 67 72
2266 67 65 66 70 69
2267 68 65 66 70 71
2268 68 67 66 70 69
2269 69 67 66 70 71
2270 65 66 70 71 68
2271 66 66 70 71 73
2272 63 69 70 71 68
2273 64 69 70 71 73
2274 59 8 65 66 67
2275 60 8 65 66 70
2276 61 64 65 66 67
2277 62 64 65 66 70
2278 57 69 64 65 8
2279 58 69 64 65 66
2280 58 65 64 69 70
2281 57 65 64 69 100
2282 35 4 14 17 18
2283 36 4 14 17 19
2284 36 4 14 17 26
2285 37 15 14 17 18
2286 38 15 14 17 19
2287 38 15 14 17 26
2288 37 16 14 17 18
2289 38 16 14 17 19
2290 38 16 14 17 26
2291 70 1046 1047 1048 1051
2292 71 1046 1047 1048 1054
2293 72 1052 1047 1048 1051
2294 73 1052 1047 1048 1054
2295 70 1047 1048 1051 1050
2296 72 1047 1048 1051 1053
2297 71 1054 1048 1051 1050
2298 73 1054 1048 1051 1053
2299 74 1047 1048 1054 1055
2300 74 1047 1048 1054 1056
2301 75 1047 1048 1054 1057
2302 74 1051 1048 1054 1055
2303 74 1051 1048 1054 1056
2304 75 1051 1048 1054 1057
2305 76 1048 1054 1057 1058
2306 76 1048 1054 1057 1059
2307 77 1048 1054 1057 1060
2308 78 1055 1054 1057 1058
2309 78 1055 1054 1057 1059
2310 79 1055 1054 1057 1060
2311 78 1056 1054 1057 1058
2312 78 1056 1054 1057 1059
2313 79 1056 1054 1057 1060
2314 53 1057 1060 1063 1064
2315 53 1057 1060 1063 1065
2316 82 1057 1060 1063 1066
2317 52 1061 1060 1063 1064
2318 52 1061 1060 1063 1065
2319 53 1061 1060 1063 1066
2320 52 1062 1060 1063 1064
2321 52 1062 1060 1063 1065
2322 53 1062 1060 1063 1066
2323 53 1060 1063 1066 1067
2324 53 1060 1063 1066 1068
2325 82 1060 1063 1066 1069
2326 52 1064 1063 1066 1067
2327 52 1064 1063 1066 1068
2328 53 1064 1063 1066 1069
2329 52 1065 1063 1066 1067
2330 52 1065 1063 1066 1068
2331 53 1065 1063 1066 1069
2332 80 1054 1057 1060 1061
2333 80 1054 1057 1060 1062
2334 81 1054 1057 1060 1063
2335 52 1058 1057 1060 1061
2336 52 1058 1057 1060 1062
2337 53 1058 1057 1060 1063
2338 52 1059 1057 1060 1061
2339 52 1059 1057 1060 1062
2340 53 1059 1057 1060 1063
2341 53 1063 1066 1069 1070
2342 53 1063 1066 1069 1071
2343 82 1063 1066 1069 1072
2344 52 1067 1066 1069 1070
2345 52 1067 1066 1069 1071
2346 53 1067 1066 1069 1072
2347 52 1068 1066 1069 1070
2348 52 1068 1066 1069 1071
2349 53 1068 1066 1069 1072
2350 53 861 864 867 868
2351 53 861 864 867 869
2352 82 861 864 867 870
2353 52 865 864 867 868
2354 52 865 864 867 869
2355 53 865 864 867 870
2356 52 866 864 867 868
2357 52 866 864 867 869
2358 53 866 864 867 870
2359 76 852 858 861 862
2360 76 852 858 861 863
2361 77 852 858 861 864
2362 78 859 858 861 862
2363 78 859 858 861 863
2364 79 859 858 861 864
2365 78 860 858 861 862
2366 78 860 858 861 863
2367 79 860 858 861 864
2368 70 851 852 855 854
2369 72 851 852 855 857
2370 71 858 852 855 854
2371 73 858 852 855 857
2372 74 851 852 858 859
2373 74 851 852 858 860
2374 75 851 852 858 861
2375 74 855 852 858 859
2376 74 855 852 858 860
2377 75 855 852 858 861
2378 80 858 861 864 865
2379 80 858 861 864 866
2380 81 858 861 864 867
2381 52 862 861 864 865
2382 52 862 861 864 866
2383 53 862 861 864 867
2384 52 863 861 864 865
2385 52 863 861 864 866
2386 53 863 861 864 867
2387 9 884 885 888 886
2388 10 884 885 888 887
2389 11 894 885 888 886
2390 12 894 885 888 887
2391 28 887 883 884 853
2392 1 887 883 884 885
2393 3 884 883 887 888
2394 4 884 883 887 892
2395 70 850 851 852 855
2396 71 850 851 852 858
2397 72 856 851 852 855
2398 73 856 851 852 858
2399 65 850 854 855 852
2400 66 850 854 855 857
2401 63 853 854 855 852
2402 64 853 854 855 857
2403 29 853 884 885 888
2404 30 853 884 885 894
2405 5 883 884 885 888
2406 6 883 884 885 894
2407 62 848 853 854 850
2408 61 848 853 854 855
2409 60 884 853 854 850
2410 59 884 853 854 855
2411 31 848 853 884 883
2412 33 848 853 884 885
2413 32 854 853 884 883
2414 34 854 853 884 885
2415 57 853 848 849 792
2416 58 853 848 849 850
2417 58 849 848 853 854
2418 57 849 848 853 884
2419 63 849 850 851 852
2420 64 849 850 851 856
2421 65 854 850 851 852
2422 66 854 850 851 856
2423 67 849 850 854 853
2424 68 849 850 854 855
2425 68 851 850 854 853
2426 69 851 850 854 855
2427 59 792 849 850 851
2428 60 792 849 850 854
2429 61 848 849 850 851
2430 62 848 849 850 854
2431 5 791 792 793 795
2432 6 791 792 793 797
2433 29 849 792 793 795
2434 30 849 792 793 797
2435 31 791 792 849 848
2436 32 791 792 849 850
2437 33 793 792 849 848
2438 34 793 792 849 850
2439 1 794 791 792 793
2440 28 794 791 792 849
2441 4 792 791 794 789
2442 3 792 791 794 795
2443 24 5 10 11 4
2444 23 5 10 11 9
2445 22 7 10 11 4
2446 21 7 10 11 9
2447 21 1 5 6 3
2448 22 1 5 6 4
2449 23 10 5 6 3
2450 24 10 5 6 4
2451 25 1 5 10 7
2452 26 1 5 10 11
2453 26 6 5 10 7
2454 27 6 5 10 11
2455 1 5 1 2 3
2456 2 5 1 2 1177
2457 3 2 1 5 6
2458 4 2 1 5 10
2459 9 2 3 6 4
2460 10 2 3 6 5
2461 11 12 3 6 4
2462 12 12 3 6 5
2463 5 1 2 3 6
2464 6 1 2 3 12
2465 7 1177 2 3 6
2466 8 1177 2 3 12
2467 53 1066 1069 1072 1073
2468 53 1066 1069 1072 1074
2469 54 1066 1069 1072 1075
2470 52 1070 1069 1072 1073
2471 52 1070 1069 1072 1074
2472 55 1070 1069 1072 1075
2473 52 1071 1069 1072 1073
2474 52 1071 1069 1072 1074
2475 55 1071 1069 1072 1075
2476 56 1069 1072 1075 1076
2477 56 1069 1072 1075 1077
2478 56 1069 1072 1075 1078
2479 49 1073 1072 1075 1076
2480 49 1073 1072 1075 1077
2481 49 1073 1072 1075 1078
2482 49 1074 1072 1075 1076
2483 49 1074 1072 1075 1077
2484 49 1074 1072 1075 1078
2485 53 864 867 870 871
2486 53 864 867 870 872
2487 82 864 867 870 873
2488 52 868 867 870 871
2489 52 868 867 870 872
2490 53 868 867 870 873
2491 52 869 867 870 871
2492 52 869 867 870 872
2493 53 869 867 870 873
2494 53 867 870 873 874
2495 53 867 870 873 875
2496 82 867 870 873 876
2497 52 871 870 873 874
2498 52 871 870 873 875
2499 53 871 870 873 876
2500 52 872 870 873 874
2501 52 872 870 873 875
2502 53 872 870 873 876
2503 53 870 873 876 877
2504 53 870 873 876 878
2505 54 870 873 876 879
2506 52 874 873 876 877
2507 52 874 873 876 878
2508 55 874 873 876 879
2509 52 875 873 876 877
2510 52 875 873 876 878
2511 55 875 873 876 879
2512 56 873 876 879 880
2513 56 873 876 879 881
2514 56 873 876 879 882
2515 49 877 876 879 880
2516 49 877 876 879 881
2517 49 877 876 879 882
2518 49 878 876 879 880
2519 49 878 876 879 881
2520 49 878 876 879 882
2521 70 262 263 264 267
2522 71 262 263 264 270
2523 72 268 263 264 267
2524 73 268 263 264 270
2525 70 263 264 267 266
2526 72 263 264 267 269
2527 71 270 264 267 266
2528 73 270 264 267 269
2529 74 263 264 270 271
2530 74 263 264 270 272
2531 75 263 264 270 273
2532 74 267 264 270 271
2533 74 267 264 270 272
2534 75 267 264 270 273
2535 76 264 270 273 274
2536 76 264 270 273 275
2537 77 264 270 273 276
2538 78 271 270 273 274
2539 78 271 270 273 275
2540 79 271 270 273 276
2541 78 272 270 273 274
2542 78 272 270 273 275
2543 79 272 270 273 276
2544 80 270 273 276 277
2545 80 270 273 276 278
2546 81 270 273 276 279
2547 52 274 273 276 277
2548 52 274 273 276 278
2549 53 274 273 276 279
2550 52 275 273 276 277
2551 52 275 273 276 278
2552 53 275 273 276 279
2553 53 279 282 285 286
2554 53 279 282 285 287
2555 82 279 282 285 288
2556 52 283 282 285 286
2557 52 283 282 285 287
2558 53 283 282 285 288
2559 52 284 282 285 286
2560 52 284 282 285 287
2561 53 284 282 285 288
2562 53 273 276 279 280
2563 53 273 276 279 281
2564 82 273 276 279 282
2565 52 277 276 279 280
2566 52 277 276 279 281
2567 53 277 276 279 282
2568 52 278 276 279 280
2569 52 278 276 279 281
2570 53 278 276 279 282
2571 53 276 279 282 283
2572 53 276 279 282 284
2573 82 276 279 282 285
2574 52 280 279 282 283
2575 52 280 279 282 284
2576 53 280 279 282 285
2577 52 281 279 282 283
2578 52 281 279 282 284
2579 53 281 279 282 285
2580 53 222 225 228 229
2581 53 222 225 228 230
2582 54 222 225 228 231
2583 52 226 225 228 229
2584 52 226 225 228 230
2585 55 226 225 228 231
2586 52 227 225 228 229
2587 52 227 225 228 230
2588 55 227 225 228 231
2589 50 213 222 225 226
2590 50 213 222 225 227
2591 51 213 222 225 228
2592 52 223 222 225 226
2593 52 223 222 225 227
2594 53 223 222 225 228
2595 52 224 222 225 226
2596 52 224 222 225 227
2597 53 224 222 225 228
2598 35 200 235 238 239
2599 36 200 235 238 240
2600 36 200 235 238 247
2601 37 236 235 238 239
2602 38 236 235 238 240
2603 38 236 235 238 247
2604 37 237 235 238 239
2605 38 237 235 238 240
2606 38 237 235 238 247
2607 13 207 200 202 199
2608 14 207 200 202 201
2609 15 210 200 202 199
2610 16 210 200 202 201
2611 15 235 200 202 199
2612 16 235 200 202 201
2613 13 202 200 207 205
2614 14 202 200 207 206
2615 15 210 200 207 205
2616 16 210 200 207 206
2617 15 235 200 207 205
2618 16 235 200 207 206
2619 17 202 200 210 211
2620 17 202 200 210 212
2621 18 202 200 210 213
2622 17 207 200 210 211
2623 17 207 200 210 212
2624 18 207 200 210 213
2625 19 235 200 210 211
2626 19 235 200 210 212
2627 20 235 200 210 213
2628 17 202 200 235 236
2629 17 202 200 235 237
2630 18 202 200 235 238
2631 17 207 200 235 236
2632 17 207 200 235 237
2633 18 207 200 235 238
2634 19 210 200 235 236
2635 19 210 200 235 237
2636 20 210 200 235 238
2637 35 200 210 213 214
2638 36 200 210 213 215
2639 36 200 210 213 222
2640 37 211 210 213 214
2641 38 211 210 213 215
2642 38 211 210 213 222
2643 37 212 210 213 214
2644 38 212 210 213 215
2645 38 212 210 213 222
2646 39 210 213 215 216
2647 39 210 213 215 217
2648 40 210 213 215 218
2649 41 214 213 215 216
2650 41 214 213 215 217
2651 42 214 213 215 218
2652 43 222 213 215 216
2653 43 222 213 215 217
2654 44 222 213 215 218
2655 39 210 213 222 223
2656 39 210 213 222 224
2657 45 210 213 222 225
2658 41 214 213 222 223
2659 41 214 213 222 224
2660 46 214 213 222 225
2661 43 215 213 222 223
2662 43 215 213 222 224
2663 47 215 213 222 225
2664 48 213 215 218 219
2665 48 213 215 218 220
2666 48 213 215 218 221
2667 49 216 215 218 219
2668 49 216 215 218 220
2669 49 216 215 218 221
2670 49 217 215 218 219
2671 49 217 215 218 220
2672 49 217 215 218 221
2673 53 573 576 579 580
2674 53 573 576 579 581
2675 82 573 576 579 582
2676 52 577 576 579 580
2677 52 577 576 579 581
2678 53 577 576 579 582
2679 52 578 576 579 580
2680 52 578 576 579 581
2681 53 578 576 579 582
2682 53 576 579 582 583
2683 53 576 579 582 584
2684 54 576 579 582 585
2685 52 580 579 582 583
2686 52 580 579 582 584
2687 55 580 579 582 585
2688 52 581 579 582 583
2689 52 581 579 582 584
2690 55 581 579 582 585
2691 56 579 582 585 586
2692 56 579 582 585 587
2693 56 579 582 585 588
2694 49 583 582 585 586
2695 49 583 582 585 587
2696 49 583 582 585 588
2697 49 584 582 585 586
2698 49 584 582 585 587
2699 49 584 582 585 588
2700 53 570 573 576 577
2701 53 570 573 576 578
2702 82 570 573 576 579
2703 52 574 573 576 577
2704 52 574 573 576 578
2705 53 574 573 576 579
2706 52 575 573 576 577
2707 52 575 573 576 578
2708 53 575 573 576 579
2709 53 567 570 573 574
2710 53 567 570 573 575
2711 82 567 570 573 576
2712 52 571 570 573 574
2713 52 571 570 573 575
2714 53 571 570 573 576
2715 52 572 570 573 574
2716 52 572 570 573 575
2717 53 572 570 573 576
2718 80 564 567 570 571
2719 80 564 567 570 572
2720 81 564 567 570 573
2721 52 568 567 570 571
2722 52 568 567 570 572
2723 53 568 567 570 573
2724 52 569 567 570 571
2725 52 569 567 570 572
2726 53 569 567 570 573
2727 56 225 228 231 232
2728 56 225 228 231 233
2729 56 225 228 231 234
2730 49 229 228 231 232
2731 49 229 228 231 233
2732 49 229 228 231 234
2733 49 230 228 231 232
2734 49 230 228 231 233
2735 49 230 228 231 234
2736 56 152 155 158 159
2737 56 152 155 158 160
2738 56 152 155 158 161
2739 49 156 155 158 159
2740 49 156 155 158 160
2741 49 156 155 158 161
2742 49 157 155 158 159
2743 49 157 155 158 160
2744 49 157 155 158 161
2745 50 1095 1104 1107 1108
2746 50 1095 1104 1107 1109
2747 51 1095 1104 1107 1110
2748 52 1105 1104 1107 1108
2749 52 1105 1104 1107 1109
2750 53 1105 1104 1107 1110
2751 52 1106 1104 1107 1108
2752 52 1106 1104 1107 1109
2753 53 1106 1104 1107 1110
2754 56 1107 1110 1113 1114
2755 56 1107 1110 1113 1115
2756 56 1107 1110 1113 1116
2757 49 1111 1110 1113 1114
2758 49 1111 1110 1113 1115
2759 49 1111 1110 1113 1116
2760 49 1112 1110 1113 1114
2761 49 1112 1110 1113 1115
2762 49 1112 1110 1113 1116
2763 53 1104 1107 1110 1111
2764 53 1104 1107 1110 1112
2765 54 1104 1107 1110 1113
2766 52 1108 1107 1110 1111
2767 52 1108 1107 1110 1112
2768 55 1108 1107 1110 1113
2769 52 1109 1107 1110 1111
2770 52 1109 1107 1110 1112
2771 55 1109 1107 1110 1113
2772 35 1082 1092 1095 1096
2773 36 1082 1092 1095 1097
2774 36 1082 1092 1095 1104
2775 37 1093 1092 1095 1096
2776 38 1093 1092 1095 1097
2777 38 1093 1092 1095 1104
2778 37 1094 1092 1095 1096
2779 38 1094 1092 1095 1097
2780 38 1094 1092 1095 1104
2781 39 1092 1095 1097 1098
2782 39 1092 1095 1097 1099
2783 40 1092 1095 1097 1100
2784 41 1096 1095 1097 1098
2785 41 1096 1095 1097 1099
2786 42 1096 1095 1097 1100
2787 43 1104 1095 1097 1098
2788 43 1104 1095 1097 1099
2789 44 1104 1095 1097 1100
2790 39 1092 1095 1104 1105
2791 39 1092 1095 1104 1106
2792 45 1092 1095 1104 1107
2793 41 1096 1095 1104 1105
2794 41 1096 1095 1104 1106
2795 46 1096 1095 1104 1107
2796 43 1097 1095 1104 1105
2797 43 1097 1095 1104 1106
2798 47 1097 1095 1104 1107
2799 76 558 564 567 568
2800 76 558 564 567 569
2801 77 558 564 567 570
2802 78 565 564 567 568
2803 78 565 564 567 569
2804 79 565 564 567 570
2805 78 566 564 567 568
2806 78 566 564 567 569
2807 79 566 564 567 570
2808 48 115 117 120 121
2809 48 115 117 120 122
2810 48 115 117 120 123
2811 49 118 117 120 121
2812 49 118 117 120 122
2813 49 118 117 120 123
2814 49 119 117 120 121
2815 49 119 117 120 122
2816 49 119 117 120 123
2817 39 112 115 117 118
2818 39 112 115 117 119
2819 40 112 115 117 120
2820 41 116 115 117 118
2821 41 116 115 117 119
2822 42 116 115 117 120
2823 43 124 115 117 118
2824 43 124 115 117 119
2825 44 124 115 117 120
2826 39 112 115 124 125
2827 39 112 115 124 126
2828 45 112 115 124 127
2829 41 116 115 124 125
2830 41 116 115 124 126
2831 46 116 115 124 127
2832 43 117 115 124 125
2833 43 117 115 124 126
2834 47 117 115 124 127
2835 28 691 687 688 657
2836 1 691 687 688 689
2837 3 688 687 691 692
2838 4 688 687 691 696
2839 9 106 107 109 102
2840 10 106 107 109 108
2841 11 111 107 109 102
2842 12 111 107 109 108
2843 9 100 101 104 102
2844 10 100 101 104 103
2845 11 110 101 104 102
2846 12 110 101 104 103
2847 13 109 102 104 101
2848 14 109 102 104 103
2849 15 112 102 104 101
2850 16 112 102 104 103
2851 15 137 102 104 101
2852 16 137 102 104 103
2853 13 104 102 109 107
2854 14 104 102 109 108
2855 15 112 102 109 107
2856 16 112 102 109 108
2857 15 137 102 109 107
2858 16 137 102 109 108
2859 17 104 102 112 113
2860 17 104 102 112 114
2861 18 104 102 112 115
2862 17 109 102 112 113
2863 17 109 102 112 114
2864 18 109 102 112 115
2865 19 137 102 112 113
2866 19 137 102 112 114
2867 20 137 102 112 115
2868 17 104 102 137 138
2869 17 104 102 137 139
2870 18 104 102 137 140
2871 17 109 102 137 138
2872 17 109 102 137 139
2873 18 109 102 137 140
2874 19 112 102 137 138
2875 19 112 102 137 139
2876 20 112 102 137 140
2877 35 102 112 115 116
2878 36 102 112 115 117
2879 36 102 112 115 124
2880 37 113 112 115 116
2881 38 113 112 115 117
2882 38 113 112 115 124
2883 37 114 112 115 116
2884 38 114 112 115 117
2885 38 114 112 115 124
2886 35 102 137 140 141
2887 36 102 137 140 142
2888 36 102 137 140 149
2889 37 138 137 140 141
2890 38 138 137 140 142
2891 38 138 137 140 149
2892 37 139 137 140 141
2893 38 139 137 140 142
2894 38 139 137 140 149
2895 53 124 127 130 131
2896 53 124 127 130 132
2897 54 124 127 130 133
2898 52 128 127 130 131
2899 52 128 127 130 132
2900 55 128 127 130 133
2901 52 129 127 130 131
2902 52 129 127 130 132
2903 55 129 127 130 133
2904 50 115 124 127 128
2905 50 115 124 127 129
2906 51 115 124 127 130
2907 52 125 124 127 128
2908 52 125 124 127 129
2909 53 125 124 127 130
2910 52 126 124 127 128
2911 52 126 124 127 129
2912 53 126 124 127 130
2913 39 137 140 142 143
2914 39 137 140 142 144
2915 40 137 140 142 145
2916 41 141 140 142 143
2917 41 141 140 142 144
2918 42 141 140 142 145
2919 43 149 140 142 143
2920 43 149 140 142 144
2921 44 149 140 142 145
2922 39 137 140 149 150
2923 39 137 140 149 151
2924 45 137 140 149 152
2925 41 141 140 149 150
2926 41 141 140 149 151
2927 46 141 140 149 152
2928 43 142 140 149 150
2929 43 142 140 149 151
2930 47 142 140 149 152
2931 50 140 149 152 153
2932 50 140 149 152 154
2933 51 140 149 152 155
2934 52 150 149 152 153
2935 52 150 149 152 154
2936 53 150 149 152 155
2937 52 151 149 152 153
2938 52 151 149 152 154
2939 53 151 149 152 155
2940 48 140 142 145 146
2941 48 140 142 145 147
2942 48 140 142 145 148
2943 49 143 142 145 146
2944 49 143 142 145 147
2945 49 143 142 145 148
2946 49 144 142 145 146
2947 49 144 142 145 147
2948 49 144 142 145 148
2949 53 149 152 155 156
2950 53 149 152 155 157
2951 54 149 152 155 158
2952 52 153 152 155 156
2953 52 153 152 155 157
2954 55 153 152 155 158
2955 52 154 152 155 156
2956 52 154 152 155 157
2957 55 154 152 155 158
2958 13 1089 1082 1084 1081
2959 14 1089 1082 1084 1083
2960 15 1092 1082 1084 1081
2961 16 1092 1082 1084 1083
2962 15 1117 1082 1084 1081
2963 16 1117 1082 1084 1083
2964 13 1084 1082 1089 1087
2965 14 1084 1082 1089 1088
2966 15 1092 1082 1089 1087
2967 16 1092 1082 1089 1088
2968 15 1117 1082 1089 1087
2969 16 1117 1082 1089 1088
2970 17 1084 1082 1092 1093
2971 17 1084 1082 1092 1094
2972 18 1084 1082 1092 1095
2973 17 1089 1082 1092 1093
2974 17 1089 1082 1092 1094
2975 18 1089 1082 1092 1095
2976 19 1117 1082 1092 1093
2977 19 1117 1082 1092 1094
2978 20 1117 1082 1092 1095
2979 17 1084 1082 1117 1118
2980 17 1084 1082 1117 1119
2981 18 1084 1082 1117 1120
2982 17 1089 1082 1117 1118
2983 17 1089 1082 1117 1119
2984 18 1089 1082 1117 1120
2985 19 1092 1082 1117 1118
2986 19 1092 1082 1117 1119
2987 20 1092 1082 1117 1120
2988 29 657 688 689 692
2989 30 657 688 689 698
2990 5 687 688 689 692
2991 6 687 688 689 698
2992 9 688 689 692 690
2993 10 688 689 692 691
2994 11 698 689 692 690
2995 12 698 689 692 691
2996 48 1095 1097 1100 1101
2997 48 1095 1097 1100 1102
2998 48 1095 1097 1100 1103
2999 49 1098 1097 1100 1101
3000 49 1098 1097 1100 1102
3001 49 1098 1097 1100 1103
3002 49 1099 1097 1100 1101
3003 49 1099 1097 1100 1102
3004 49 1099 1097 1100 1103
3005 35 690 725 728 729
3006 36 690 725 728 730
3007 36 690 725 728 737
3008 37 726 725 728 729
3009 38 726 725 728 730
3010 38 726 725 728 737
3011 37 727 725 728 729
3012 38 727 725 728 730
3013 38 727 725 728 737
3014 39 725 728 730 731
3015 39 725 728 730 732
3016 40 725 728 730 733
3017 41 729 728 730 731
3018 41 729 728 730 732
3019 42 729 728 730 733
3020 43 737 728 730 731
3021 43 737 728 730 732
3022 44 737 728 730 733
3023 39 725 728 737 738
3024 39 725 728 737 739
3025 45 725 728 737 740
3026 41 729 728 737 738
3027 41 729 728 737 739
3028 46 729 728 737 740
3029 43 730 728 737 738
3030 43 730 728 737 739
3031 47 730 728 737 740
3032 50 728 737 740 741
3033 50 728 737 740 742
3034 51 728 737 740 743
3035 52 738 737 740 741
3036 52 738 737 740 742
3037 53 738 737 740 743
3038 52 739 737 740 741
3039 52 739 737 740 742
3040 53 739 737 740 743
3041 50 1120 1129 1132 1133
3042 50 1120 1129 1132 1134
3043 51 1120 1129 1132 1135
3044 52 1130 1129 1132 1133
3045 52 1130 1129 1132 1134
3046 53 1130 1129 1132 1135
3047 52 1131 1129 1132 1133
3048 52 1131 1129 1132 1134
3049 53 1131 1129 1132 1135
3050 39 1117 1120 1122 1123
3051 39 1117 1120 1122 1124
3052 40 1117 1120 1122 1125
3053 41 1121 1120 1122 1123
3054 41 1121 1120 1122 1124
3055 42 1121 1120 1122 1125
3056 43 1129 1120 1122 1123
3057 43 1129 1120 1122 1124
3058 44 1129 1120 1122 1125
3059 39 1117 1120 1129 1130
3060 39 1117 1120 1129 1131
3061 45 1117 1120 1129 1132
3062 41 1121 1120 1129 1130
3063 41 1121 1120 1129 1131
3064 46 1121 1120 1129 1132
3065 43 1122 1120 1129 1130
3066 43 1122 1120 1129 1131
3067 47 1122 1120 1129 1132
3068 53 1129 1132 1135 1136
3069 53 1129 1132 1135 1137
3070 54 1129 1132 1135 1138
3071 52 1133 1132 1135 1136
3072 52 1133 1132 1135 1137
3073 55 1133 1132 1135 1138
3074 52 1134 1132 1135 1136
3075 52 1134 1132 1135 1137
3076 55 1134 1132 1135 1138
3077 56 1132 1135 1138 1139
3078 56 1132 1135 1138 1140
3079 56 1132 1135 1138 1141
3080 49 1136 1135 1138 1139
3081 49 1136 1135 1138 1140
3082 49 1136 1135 1138 1141
3083 49 1137 1135 1138 1139
3084 49 1137 1135 1138 1140
3085 49 1137 1135 1138 1141
3086 35 1082 1117 1120 1121
3087 36 1082 1117 1120 1122
3088 36 1082 1117 1120 1129
3089 37 1118 1117 1120 1121
3090 38 1118 1117 1120 1122
3091 38 1118 1117 1120 1129
3092 37 1119 1117 1120 1121
3093 38 1119 1117 1120 1122
3094 38 1119 1117 1120 1129
3095 48 1120 1122 1125 1126
3096 48 1120 1122 1125 1127
3097 48 1120 1122 1125 1128
3098 49 1123 1122 1125 1126
3099 49 1123 1122 1125 1127
3100 49 1123 1122 1125 1128
3101 49 1124 1122 1125 1126
3102 49 1124 1122 1125 1127
3103 49 1124 1122 1125 1128
3104 56 813 816 819 820
3105 56 813 816 819 821
3106 56 813 816 819 822
3107 49 817 816 819 820
3108 49 817 816 819 821
3109 49 817 816 819 822
3110 49 818 816 819 820
3111 49 818 816 819 821
3112 49 818 816 819 822
3113 53 83 86 89 90
3114 53 83 86 89 91
3115 82 83 86 89 92
3116 52 87 86 89 90
3117 52 87 86 89 91
3118 53 87 86 89 92
3119 52 88 86 89 90
3120 52 88 86 89 91
3121 53 88 86 89 92
3122 53 80 83 86 87
3123 53 80 83 86 88
3124 82 80 83 86 89
3125 52 84 83 86 87
3126 52 84 83 86 88
3127 53 84 83 86 89
3128 52 85 83 86 87
3129 52 85 83 86 88
3130 53 85 83 86 89
3131 53 77 80 83 84
3132 53 77 80 83 85
3133 82 77 80 83 86
3134 52 81 80 83 84
3135 52 81 80 83 85
3136 53 81 80 83 86
3137 52 82 80 83 84
3138 52 82 80 83 85
3139 53 82 80 83 86
3140 80 74 77 80 81
3141 80 74 77 80 82
3142 81 74 77 80 83
3143 52 78 77 80 81
3144 52 78 77 80 82
3145 53 78 77 80 83
3146 52 79 77 80 81
3147 52 79 77 80 82
3148 53 79 77 80 83
3149 76 68 74 77 78
3150 76 68 74 77 79
3151 77 68 74 77 80
3152 78 75 74 77 78
3153 78 75 74 77 79
3154 79 75 74 77 80
3155 78 76 74 77 78
3156 78 76 74 77 79
3157 79 76 74 77 80
3158 70 66 67 68 71
3159 71 66 67 68 74
3160 72 72 67 68 71
3161 73 72 67 68 74
3162 70 67 68 71 70
3163 72 67 68 71 73
3164 71 74 68 71 70
3165 73 74 68 71 73
3166 74 67 68 74 75
3167 74 67 68 74 76
3168 75 67 68 74 77
3169 74 71 68 74 75
3170 74 71 68 74 76
3171 75 71 68 74 77
3172 56 127 130 133 134
3173 56 127 130 133 135
3174 56 127 130 133 136
3175 49 131 130 133 134
3176 49 131 130 133 135
3177 49 131 130 133 136
3178 49 132 130 133 134
3179 49 132 130 133 135
3180 49 132 130 133 136
3181 1 696 693 694 695
3182 28 696 693 694 751
3183 4 694 693 696 691
3184 3 694 693 696 697
3185 57 755 750 751 694
3186 58 755 750 751 752
3187 58 751 750 755 756
3188 57 751 750 755 786
3189 5 693 694 695 697
3190 6 693 694 695 699
3191 29 751 694 695 697
3192 30 751 694 695 699
3193 31 693 694 751 750
3194 32 693 694 751 752
3195 33 695 694 751 750
3196 34 695 694 751 752
3197 59 694 751 752 753
3198 60 694 751 752 756
3199 61 750 751 752 753
3200 62 750 751 752 756
3201 63 751 752 753 754
3202 64 751 752 753 758
3203 65 756 752 753 754
3204 66 756 752 753 758
3205 67 751 752 756 755
3206 68 751 752 756 757
3207 68 753 752 756 755
3208 69 753 752 756 757
3209 24 691 696 697 690
3210 23 691 696 697 695
3211 22 693 696 697 690
3212 21 693 696 697 695
3213 21 687 691 692 689
3214 22 687 691 692 690
3215 23 696 691 692 689
3216 24 696 691 692 690
3217 25 687 691 696 693
3218 26 687 691 696 697
3219 26 692 691 696 693
3220 27 692 691 696 697
3221 9 694 695 697 690
3222 10 694 695 697 696
3223 11 699 695 697 690
3224 12 699 695 697 696
3225 50 703 712 715 716
3226 50 703 712 715 717
3227 51 703 712 715 718
3228 52 713 712 715 716
3229 52 713 712 715 717
3230 53 713 712 715 718
3231 52 714 712 715 716
3232 52 714 712 715 717
3233 53 714 712 715 718
3234 35 690 700 703 704
3235 36 690 700 703 705
3236 36 690 700 703 712
3237 37 701 700 703 704
3238 38 701 700 703 705
3239 38 701 700 703 712
3240 37 702 700 703 704
3241 38 702 700 703 705
3242 38 702 700 703 712
3243 39 700 703 705 706
3244 39 700 703 705 707
3245 40 700 703 705 708
3246 41 704 703 705 706
3247 41 704 703 705 707
3248 42 704 703 705 708
3249 43 712 703 705 706
3250 43 712 703 705 707
3251 44 712 703 705 708
3252 39 700 703 712 713
3253 39 700 703 712 714
3254 45 700 703 712 715
3255 41 704 703 712 713
3256 41 704 703 712 714
3257 46 704 703 712 715
3258 43 705 703 712 713
3259 43 705 703 712 714
3260 47 705 703 712 715
3261 48 703 705 708 709
3262 48 703 705 708 710
3263 48 703 705 708 711
3264 49 706 705 708 709
3265 49 706 705 708 710
3266 49 706 705 708 711
3267 49 707 705 708 709
3268 49 707 705 708 710
3269 49 707 705 708 711
3270 13 697 690 692 689
3271 14 697 690 692 691
3272 15 700 690 692 689
3273 16 700 690 692 691
3274 15 725 690 692 689
3275 16 725 690 692 691
3276 13 692 690 697 695
3277 14 692 690 697 696
3278 15 700 690 697 695
3279 16 700 690 697 696
3280 15 725 690 697 695
3281 16 725 690 697 696
3282 17 692 690 700 701
3283 17 692 690 700 702
3284 18 692 690 700 703
3285 17 697 690 700 701
3286 17 697 690 700 702
3287 18 697 690 700 703
3288 19 725 690 700 701
3289 19 725 690 700 702
3290 20 725 690 700 703
3291 17 692 690 725 726
3292 17 692 690 725 727
3293 18 692 690 725 728
3294 17 697 690 725 726
3295 17 697 690 725 727
3296 18 697 690 725 728
3297 19 700 690 725 726
3298 19 700 690 725 727
3299 20 700 690 725 728
3300 53 712 715 718 719
3301 53 712 715 718 720
3302 54 712 715 718 721
3303 52 716 715 718 719
3304 52 716 715 718 720
3305 55 716 715 718 721
3306 52 717 715 718 719
3307 52 717 715 718 720
3308 55 717 715 718 721
3309 9 792 793 795 788
3310 10 792 793 795 794
3311 11 797 793 795 788
3312 12 797 793 795 794
3313 24 789 794 795 788
3314 23 789 794 795 793
3315 22 791 794 795 788
3316 21 791 794 795 793
3317 48 728 730 733 734
3318 48 728 730 733 735
3319 48 728 730 733 736
3320 49 731 730 733 734
3321 49 731 730 733 735
3322 49 731 730 733 736
3323 49 732 730 733 734
3324 49 732 730 733 735
3325 49 732 730 733 736
3326 13 795 788 790 787
3327 14 795 788 790 789
3328 15 798 788 790 787
3329 16 798 788 790 789
3330 15 823 788 790 787
3331 16 823 788 790 789
3332 13 790 788 795 793
3333 14 790 788 795 794
3334 15 798 788 795 793
3335 16 798 788 795 794
3336 15 823 788 795 793
3337 16 823 788 795 794
3338 17 790 788 798 799
3339 17 790 788 798 800
3340 18 790 788 798 801
3341 17 795 788 798 799
3342 17 795 788 798 800
3343 18 795 788 798 801
3344 19 823 788 798 799
3345 19 823 788 798 800
3346 20 823 788 798 801
3347 17 790 788 823 824
3348 17 790 788 823 825
3349 18 790 788 823 826
3350 17 795 788 823 824
3351 17 795 788 823 825
3352 18 795 788 823 826
3353 19 798 788 823 824
3354 19 798 788 823 825
3355 20 798 788 823 826
3356 35 788 798 801 802
3357 36 788 798 801 803
3358 36 788 798 801 810
3359 37 799 798 801 802
3360 38 799 798 801 803
3361 38 799 798 801 810
3362 37 800 798 801 802
3363 38 800 798 801 803
3364 38 800 798 801 810
3365 39 798 801 803 804
3366 39 798 801 803 805
3367 40 798 801 803 806
3368 41 802 801 803 804
3369 41 802 801 803 805
3370 42 802 801 803 806
3371 43 810 801 803 804
3372 43 810 801 803 805
3373 44 810 801 803 806
3374 39 798 801 810 811
3375 39 798 801 810 812
3376 45 798 801 810 813
3377 41 802 801 810 811
3378 41 802 801 810 812
3379 46 802 801 810 813
3380 43 803 801 810 811
3381 43 803 801 810 812
3382 47 803 801 810 813
3383 50 801 810 813 814
3384 50 801 810 813 815
3385 51 801 810 813 816
3386 52 811 810 813 814
3387 52 811 810 813 815
3388 53 811 810 813 816
3389 52 812 810 813 814
3390 52 812 810 813 815
3391 53 812 810 813 816
3392 53 810 813 816 817
3393 53 810 813 816 818
3394 54 810 813 816 819
3395 52 814 813 816 817
3396 52 814 813 816 818
3397 55 814 813 816 819
3398 52 815 813 816 817
3399 52 815 813 816 818
3400 55 815 813 816 819
3401 21 785 789 790 787
3402 22 785 789 790 788
3403 23 794 789 790 787
3404 24 794 789 790 788
3405 25 785 789 794 791
3406 26 785 789 794 795
3407 26 790 789 794 791
3408 27 790 789 794 795
3409 28 789 785 786 755
3410 1 789 785 786 787
3411 3 786 785 789 790
3412 4 786 785 789 794
3413 65 752 756 757 754
3414 66 752 756 757 759
3415 63 755 756 757 754
3416 64 755 756 757 759
3417 9 786 787 790 788
3418 10 786 787 790 789
3419 11 796 787 790 788
3420 12 796 787 790 789
3421 29 755 786 787 790
3422 30 755 786 787 796
3423 5 785 786 787 790
3424 6 785 786 787 796
3425 62 750 755 756 752
3426 61 750 755 756 757
3427 60 786 755 756 752
3428 59 786 755 756 757
3429 31 750 755 786 785
3430 33 750 755 786 787
3431 32 756 755 786 785
3432 34 756 755 786 787
3433 56 715 718 721 722
3434 56 715 718 721 723
3435 56 715 718 721 724
3436 49 719 718 721 722
3437 49 719 718 721 723
3438 49 719 718 721 724
3439 49 720 718 721 722
3440 49 720 718 721 723
3441 49 720 718 721 724
3442 70 753 754 757 756
3443 72 753 754 757 759
3444 71 760 754 757 756
3445 73 760 754 757 759
3446 74 753 754 760 761
3447 74 753 754 760 762
3448 75 753 754 760 763
3449 74 757 754 760 761
3450 74 757 754 760 762
3451 75 757 754 760 763
3452 53 835 838 841 842
3453 53 835 838 841 843
3454 54 835 838 841 844
3455 52 839 838 841 842
3456 52 839 838 841 843
3457 55 839 838 841 844
3458 52 840 838 841 842
3459 52 840 838 841 843
3460 55 840 838 841 844
3461 53 769 772 775 776
3462 53 769 772 775 777
3463 82 769 772 775 778
3464 52 773 772 775 776
3465 52 773 772 775 777
3466 53 773 772 775 778
3467 52 774 772 775 776
3468 52 774 772 775 777
3469 53 774 772 775 778
3470 50 826 835 838 839
3471 50 826 835 838 840
3472 51 826 835 838 841
3473 52 836 835 838 839
3474 52 836 835 838 840
3475 53 836 835 838 841
3476 52 837 835 838 839
3477 52 837 835 838 840
3478 53 837 835 838 841
3479 56 838 841 844 845
3480 56 838 841 844 846
3481 56 838 841 844 847
3482 49 842 841 844 845
3483 49 842 841 844 846
3484 49 842 841 844 847
3485 49 843 841 844 845
3486 49 843 841 844 846
3487 49 843 841 844 847
3488 76 754 760 763 764
3489 76 754 760 763 765
3490 77 754 760 763 766
3491 78 761 760 763 764
3492 78 761 760 763 765
3493 79 761 760 763 766
3494 78 762 760 763 764
3495 78 762 760 763 765
3496 79 762 760 763 766
3497 80 760 763 766 767
3498 80 760 763 766 768
3499 81 760 763 766 769
3500 52 764 763 766 767
3501 52 764 763 766 768
3502 53 764 763 766 769
3503 52 765 763 766 767
3504 52 765 763 766 768
3505 53 765 763 766 769
3506 53 763 766 769 770
3507 53 763 766 769 771
3508 82 763 766 769 772
3509 52 767 766 769 770
3510 52 767 766 769 771
3511 53 767 766 769 772
3512 52 768 766 769 770
3513 52 768 766 769 771
3514 53 768 766 769 772
3515 53 766 769 772 773
3516 53 766 769 772 774
3517 82 766 769 772 775
3518 52 770 769 772 773
3519 52 770 769 772 774
3520 53 770 769 772 775
3521 52 771 769 772 773
3522 52 771 769 772 774
3523 53 771 769 772 775
3524 53 772 775 778 779
3525 53 772 775 778 780
3526 54 772 775 778 781
3527 52 776 775 778 779
3528 52 776 775 778 780
3529 55 776 775 778 781
3530 52 777 775 778 779
3531 52 777 775 778 780
3532 55 777 775 778 781
3533 48 826 828 831 832
3534 48 826 828 831 833
3535 48 826 828 831 834
3536 49 829 828 831 832
3537 49 829 828 831 833
3538 49 829 828 831 834
3539 49 830 828 831 832
3540 49 830 828 831 833
3541 49 830 828 831 834
3542 70 752 753 754 757
3543 71 752 753 754 760
3544 72 758 753 754 757
3545 73 758 753 754 760
3546 56 775 778 781 782
3547 56 775 778 781 783
3548 56 775 778 781 784
3549 49 779 778 781 782
3550 49 779 778 781 783
3551 49 779 778 781 784
3552 49 780 778 781 782
3553 49 780 778 781 783
3554 49 780 778 781 784
3555 39 823 826 828 829
3556 39 823 826 828 830
3557 40 823 826 828 831
3558 41 827 826 828 829
3559 41 827 826 828 830
3560 42 827 826 828 831
3561 43 835 826 828 829
3562 43 835 826 828 830
3563 44 835 826 828 831
3564 39 823 826 835 836
3565 39 823 826 835 837
3566 45 823 826 835 838
3567 41 827 826 835 836
3568 41 827 826 835 837
3569 46 827 826 835 838
3570 43 828 826 835 836
3571 43 828 826 835 837
3572 47 828 826 835 838
3573 35 788 823 826 827
3574 36 788 823 826 828
3575 36 788 823 826 835
3576 37 824 823 826 827
3577 38 824 823 826 828
3578 38 824 823 826 835
3579 37 825 823 826 827
3580 38 825 823 826 828
3581 38 825 823 826 835
3582 48 801 803 806 807
3583 48 801 803 806 808
3584 48 801 803 806 809
3585 49 804 803 806 807
3586 49 804 803 806 808
3587 49 804 803 806 809
3588 49 805 803 806 807
3589 49 805 803 806 808
3590 49 805 803 806 809
3591 53 737 740 743 744
3592 53 737 740 743 745
3593 54 737 740 743 746
3594 52 741 740 743 744
3595 52 741 740 743 745
3596 55 741 740 743 746
3597 52 742 740 743 744
3598 52 742 740 743 745
3599 55 742 740 743 746
3600 56 740 743 746 747
3601 56 740 743 746 748
3602 56 740 743 746 749
3603 49 744 743 746 747
3604 49 744 743 746 748
3605 49 744 743 746 749
3606 49 745 743 746 747
3607 49 745 743 746 748
3608 49 745 743 746 749

Impropers

1 17 364 367 365 362
2 13 360 362 361 366
3 18 367 362 365 364
4 10 363 365 364 360
5 11 361 364 360 359
6 16 362 364 365 367
7 12 360 363 364 365
8 6 397 395 398 396
9 4 395 396 398 397
10 9 402 396 403 401
11 3 402 393 397 398
12 1 393 398 397 402
13 5 396 397 398 395
14 2 403 397 402 399
15 2 398 402 397 393
16 8 401 402 403 396
17 1 399 403 402 397
18 3 397 399 402 403
19 7 396 401 403 402
20 12 364 359 360 361
21 15 366 360 361 362
22 11 365 360 364 363
23 14 362 366 361 360
24 7 298 303 305 304
25 10 359 361 360 364
26 1 301 305 304 299
27 3 299 301 304 305
28 2 300 304 299 295
29 8 303 304 305 298
30 5 298 299 300 297
31 2 305 299 304 301
32 12 462 457 458 459
33 14 460 464 459 458
34 10 457 459 458 462
35 15 464 458 459 460
36 11 463 458 462 461
37 11 459 462 458 457
38 16 460 462 463 465
39 12 458 461 462 463
40 13 458 460 459 464
41 18 465 460 463 462
42 10 461 463 462 458
43 17 462 465 463 460
44 3 500 491 495 496
45 5 494 495 496 493
46 2 501 495 500 497
47 6 495 493 496 494
48 1 491 496 495 500
49 17 952 955 953 950
50 13 948 950 949 954
51 18 955 950 953 952
52 10 951 953 952 948
53 6 985 983 986 984
54 1 981 986 985 990
55 4 983 984 986 985
56 9 990 984 991 989
57 5 984 985 986 983
58 2 991 985 990 987
59 2 986 990 985 981
60 8 989 990 991 984
61 1 987 991 990 985
62 7 984 989 991 990
63 10 947 949 948 952
64 11 949 952 948 947
65 16 950 952 953 955
66 14 950 954 949 948
67 4 885 886 888 887
68 9 892 886 893 891
69 15 954 948 949 950
70 11 953 948 952 951
71 12 952 947 948 949
72 3 887 889 892 893
73 7 886 891 893 892
74 1 889 893 892 887
75 5 886 887 888 885
76 2 893 887 892 889
77 2 888 892 887 883
78 8 891 892 893 886
79 12 948 951 952 953
80 3 990 981 985 986
81 3 985 987 990 991
82 4 297 298 300 299
83 9 304 298 305 303
84 1 295 300 299 304
85 6 299 297 300 298
86 12 262 265 266 267
87 3 304 295 299 300
88 11 263 266 262 261
89 16 264 266 267 269
90 12 266 261 262 263
91 15 268 262 263 264
92 11 267 262 266 265
93 17 266 269 267 264
94 10 265 267 266 262
95 3 206 197 201 202
96 3 201 203 206 207
97 2 202 206 201 197
98 8 205 206 207 200
99 5 200 201 202 199
100 2 207 201 206 203
101 1 197 202 201 206
102 1 203 207 206 201
103 7 200 205 207 206
104 3 495 497 500 501
105 2 496 500 495 491
106 8 499 500 501 494
107 7 494 499 501 500
108 12 560 555 556 557
109 15 562 556 557 558
110 11 561 556 560 559
111 10 555 557 556 560
112 14 558 562 557 556
113 4 493 494 496 495
114 9 500 494 501 499
115 1 497 501 500 495
116 13 164 166 165 170
117 18 171 166 169 168
118 17 168 171 169 166
119 14 166 170 165 164
120 10 163 165 164 168
121 10 167 169 168 164
122 15 170 164 165 166
123 11 169 164 168 167
124 12 168 163 164 165
125 11 165 168 164 163
126 16 166 168 169 171
127 12 164 167 168 169
128 4 591 592 594 593
129 9 598 592 599 597
130 1 595 599 598 593
131 2 594 598 593 589
132 8 597 598 599 592
133 3 593 595 598 599
134 5 592 593 594 591
135 2 599 593 598 595
136 1 589 594 593 598
137 3 598 589 593 594
138 6 201 199 202 200
139 14 1146 1150 1145 1144
140 13 1144 1146 1145 1150
141 18 1151 1146 1149 1148
142 10 1143 1145 1144 1148
143 12 556 559 560 561
144 11 557 560 556 555
145 16 558 560 561 563
146 3 1083 1085 1088 1089
147 6 593 591 594 592
148 7 1082 1087 1089 1088
149 12 1148 1143 1144 1145
150 15 1150 1144 1145 1146
151 11 1149 1144 1148 1147
152 11 1145 1148 1144 1143
153 16 1146 1148 1149 1151
154 10 559 561 560 556
155 12 1144 1147 1148 1149
156 13 556 558 557 562
157 18 563 558 561 560
158 17 1148 1151 1149 1146
159 10 1147 1149 1148 1144
160 13 654 656 655 660
161 18 661 656 659 658
162 10 653 655 654 658
163 3 103 105 108 109
164 17 658 661 659 656
165 3 108 99 103 104
166 5 102 103 104 101
167 2 109 103 108 105
168 2 104 108 103 99
169 8 107 108 109 102
170 10 657 659 658 654
171 11 655 658 654 653
172 16 656 658 659 661
173 14 656 660 655 654
174 7 592 597 599 598
175 12 1050 1045 1046 1047
176 15 1052 1046 1047 1048
177 11 1051 1046 1050 1049
178 12 1046 1049 1050 1051
179 3 1088 1079 1083 1084
180 12 658 653 654 655
181 11 1047 1050 1046 1045
182 16 1048 1050 1051 1053
183 15 660 654 655 656
184 11 659 654 658 657
185 12 654 657 658 659
186 6 1083 1081 1084 1082
187 10 1049 1051 1050 1046
188 17 1050 1053 1051 1048
189 1 1079 1084 1083 1088
190 5 1082 1083 1084 1081
191 2 1089 1083 1088 1085
192 1 1085 1089 1088 1083
193 2 1084 1088 1083 1079
194 8 1087 1088 1089 1082
195 1 883 888 887 892
196 4 3 4 6 5
197 9 10 4 11 9
198 1 7 11 10 5
199 7 4 9 11 10
200 12 66 69 70 71
201 3 5 7 10 11
202 14 68 72 67 66
203 15 72 66 67 68
204 11 71 66 70 69
205 11 67 70 66 65
206 16 68 70 71 73
207 12 70 65 66 67
208 14 1048 1052 1047 1046
209 10 1045 1047 1046 1050
210 13 1046 1048 1047 1052
211 18 1053 1048 1051 1050
212 17 854 857 855 852
213 13 850 852 851 856
214 18 857 852 855 854
215 10 853 855 854 850
216 6 887 885 888 886
217 3 892 883 887 888
218 10 849 851 850 854
219 11 851 854 850 849
220 16 852 854 855 857
221 12 850 853 854 855
222 15 856 850 851 852
223 11 855 850 854 853
224 12 854 849 850 851
225 3 789 791 794 795
226 1 1 6 5 10
227 2 6 10 5 1
228 8 9 10 11 4
229 5 4 5 6 3
230 2 11 5 10 7
231 3 10 1 5 6
232 6 5 3 6 4
233 10 261 263 262 266
234 13 262 264 263 268
235 18 269 264 267 266
236 14 264 268 263 262
237 4 199 200 202 201
238 9 206 200 207 205
239 17 560 563 561 558
240 3 696 687 691 692
241 7 102 107 109 108
242 6 103 101 104 102
243 1 99 104 103 108
244 1 105 109 108 103
245 4 101 102 104 103
246 9 108 102 109 107
247 4 1081 1082 1084 1083
248 9 1088 1082 1089 1087
249 6 691 689 692 690
250 1 687 692 691 696
251 17 70 73 71 68
252 10 65 67 66 70
253 10 69 71 70 66
254 13 66 68 67 72
255 18 73 68 71 70
256 3 691 693 696 697
257 12 756 751 752 753
258 15 758 752 753 754
259 11 757 752 756 755
260 2 692 696 691 687
261 8 695 696 697 690
262 5 690 691 692 689
263 2 697 691 696 693
264 7 690 695 697 696
265 4 689 690 692 691
266 9 696 690 697 695
267 1 693 697 696 691
268 14 852 856 851 850
269 7 788 793 795 794
270 2 790 794 789 785
271 8 793 794 795 788
272 1 791 795 794 789
273 4 787 788 790 789
274 9 794 788 795 793
275 5 788 789 790 787
276 2 795 789 794 791
277 1 785 790 789 794
278 3 794 785 789 790
279 11 753 756 752 751
280 16 754 756 757 759
281 6 789 787 790 788
282 12 752 755 756 757
283 13 752 754 753 758
284 18 759 754 757 756
285 14 754 758 753 752
286 17 756 759 757 754
287 10 755 757 756 752
288 10 751 753 752 756
