# Supplementary material for: Modelling the morphology and thermomechanical behaviour of low-bandgap conjugated polymers and bulk heterojunction films
Source: Royal Society of Chemistry journal article supplement (doi:10.1039/c6ee03456j), 2016-12-19
Supplement: c6ee03456j3.data [file c6ee03456j3.data]

LAMMPS data file via write_data, version 7 Dec 2015, timestep = 925000

1238 atoms
31 atom types
1297 bonds
40 bond types
2424 angles
76 angle types
3500 dihedrals
119 dihedral types
324 impropers
21 improper types

0.0000000000000000e+00 2.8000000000000000e+02 xlo xhi
0.0000000000000000e+00 2.8000000000000000e+02 ylo yhi
0.0000000000000000e+00 2.8000000000000000e+02 zlo zhi

Masses

1 32.06
2 12.011
3 12.011
4 12.011
5 12.011
6 12.011
7 1.008
8 15.999
9 12.011
10 1.008
11 12.011
12 1.008
13 12.011
14 12.011
15 32.06
16 12.011
17 12.011
18 32.06
19 12.011
20 12.011
21 12.011
22 12.011
23 18.998
24 15.999
25 15.999
26 12.011
27 12.011
28 1.008
29 12.011
30 1.008
31 1.008

Pair Coeffs # lj/cut/coul/long

1 0.25 3.55
2 0.07 3.55
3 0.07 3.55
4 0.07 3.55
5 0.07 3.55
6 0.07 3.55
7 0.03 2.42
8 0.14 2.9
9 0.07 3.55
10 0.03 2.42
11 0.07 3.55
12 0.03 2.5
13 0.066 3.5
14 0.066 3.5
15 0.25 3.55
16 0.07 3.55
17 0.07 3.55
18 0.25 3.55
19 0.07 3.55
20 0.07 3.55
21 0.07 3.55
22 0.07 3.55
23 0.061 2.85
24 0.21 2.96
25 0.17 3
26 0.105 3.75
27 0.066 3.5
28 0.015 2.42
29 0.066 3.5
30 0.03 2.42
31 0.03 2.42

Bond Coeffs # harmonic

1 250 1.776
2 250 1.759
3 546 1.37
4 367 1.08
5 469 1.433
6 367 1.08
7 469 1.409
8 469 1.394
9 450 1.364
10 447 1.426
11 382.9 1.448
12 320 1.41
13 340 1.09
14 268 1.529
15 340 1.09
16 268 1.529
17 340 1.09
18 268 1.529
19 340 1.09
20 268 1.529
21 250 1.756
22 250 1.75
23 546 1.382
24 250 1.761
25 546 1.436
26 250 1.778
27 546 1.367
28 400 1.471
29 546 1.435
30 420 1.337
31 546 1.394
32 379.5 1.452
33 570 1.216
34 214 1.327
35 320 1.41
36 340 1.09
37 268 1.529
38 340 1.09
39 268 1.529
40 367 1.08

Angle Coeffs # harmonic

1 74 91.2
2 70 111.7
3 35 121.6
4 35 132.1
5 85 114
6 35 125.7
7 35 120
8 63 117.5
9 70 120
10 70 120
11 70 111
12 70 126.4
13 85 122.6
14 85 128
15 70 112.1
16 85 119.9
17 70 119.7
18 70 128.6
19 75 111
20 35 109.5
21 50 109.5
22 33 107.8
23 37.5 110.7
24 37.5 110.7
25 58.35 112.7
26 37.5 110.7
27 58.35 112.7
28 37.5 110.7
29 58.35 112.7
30 33 107.8
31 37.5 110.7
32 37.5 110.7
33 33 107.8
34 58.35 112.7
35 37.5 110.7
36 58.35 112.7
37 58.35 112.7
38 74 94.3
39 70 119.7
40 70 128
41 70 108.5
42 85 132.8
43 85 114.7
44 70 112.5
45 74 90.3
46 70 112.1
47 85 121.3
48 85 126.6
49 70 114.9
50 80 123.6
51 80 121.5
52 70 110.2
53 70 113.6
54 70 136.1
55 70 108.8
56 70 119.7
57 70 128
58 83 116.9
59 80 124.8
60 80 110.5
61 83 124.7
62 35 109.5
63 50 109.5
64 33 107.8
65 37.5 110.7
66 37.5 110.7
67 58.35 112.7
68 37.5 110.7
69 58.35 112.7
70 37.5 110.7
71 58.35 112.7
72 58.35 112.7
73 70 119.7
74 70 128.6
75 35 121.6
76 35 132.1

Dihedral Coeffs # opls

1 0 2.8 0 0
2 0 2.8 0 0
3 0 3.05 0 0
4 0 3.05 0 0
5 0 7.25 0 0
6 0 7.25 0 0
7 0 7.25 0 0
8 0 7.25 0 0
9 0 7.25 0 0
10 0 7.25 0 0
11 0 7.25 0 0
12 0 7.25 0 0
13 0 7 0 0
14 0 7 0 0
15 0 7 0 0
16 0 7 0 0
17 0 7.25 0 0
18 0 7.25 0 0
19 0 7.25 0 0
20 0 7.25 0 0
21 0 3 0 0
22 0 3 0 0
23 0 6 0 0
24 0 6 0 0
25 0 6 0 0
26 0 6 0 0
27 0 2.8 0 0
28 0 7.25 0 0
29 0 7.25 0 0
30 0 0 0 0
31 -0.443 4.628 -0.218 -0.537
32 0 0 0 0
33 0 0 0 0
34 0 0 0.76 0
35 0 0 0.76 0
36 0 0 0.468 0
37 1.3 -0.05 0.2 0
38 0 0 0.3 0
39 0 0 0.3 0
40 0 0 0.3 0
41 1.3 -0.05 0.2 0
42 0 0 0.3 0
43 0 0 0.3 0
44 0 0 0.3 0
45 1.3 -0.05 0.2 0
46 1.3 -0.05 0.2 0
47 0 0 0.3 0
48 1.3 -0.05 0.2 0
49 0 0 0.3 0
50 0 0 0.3 0
51 0 0 0.3 0
52 1.3 -0.05 0.2 0
53 0 0 0.3 0
54 0 0 0.3 0
55 1.3 -0.05 0.2 0
56 0 0 0.3 0
57 0 0 0.3 0
58 0 3.05 0 0
59 0 3.05 0 0
60 0 2.8 0 0
61 0 2.8 0 0
62 0 6 0 0
63 0 6 0 0
64 0 6 0 0
65 0 6 0 0
66 0 7.25 0 0
67 0 7.25 0 0
68 0 6 0 0
69 0 6 0 0
70 0 6 0 0
71 0 6 0 0
72 0 3.05 0 0
73 0 3.05 0 0
74 0 7.25 0 0
75 0 7.25 0 0
76 0 7.25 0 0
77 0 7.25 0 0
78 0.75 1.5 0 0
79 0.75 1.5 0 0
80 0.75 1.5 0 0
81 0.75 1.5 0 0
82 0 7.25 0 0
83 0 7.25 0 0
84 0 7.25 0 0
85 0 7.25 0 0
86 0 6 0 0
87 0 6 0 0
88 0 6 0 0
89 0 6 0 0
90 0 0 0 0
91 0 0 0 0
92 -0.245 5.055 0.261 -0.548
93 0 0 0 0
94 4 5 0 0
95 0 5.124 0 0
96 0 0 0.198 0
97 -1.22 -0.126 0.422 0
98 0 0 0.468 0
99 1.3 -0.05 0.2 0
100 0 0 0.3 0
101 0 0 0.3 0
102 0 0 0.3 0
103 1.3 -0.05 0.2 0
104 0 0 0.3 0
105 0 0 0.3 0
106 0 0 0.3 0
107 1.3 -0.05 0.2 0
108 1.3 -0.05 0.2 0
109 0 0 0.3 0
110 1.3 -0.05 0.2 0
111 0 0 0.3 0
112 0 0 0.3 0
113 1.3 -0.05 0.2 0
114 0 2.8 0 0
115 0 7.25 0 0
116 0 7.25 0 0
117 0 2.8 0 0
118 0 6 0 0
119 0 6 0 0

Improper Coeffs # cvff

1 0.8335 -1 2
2 0.8335 -1 2
3 0.8335 -1 2
4 0.8335 -1 2
5 0.8335 -1 2
6 0.8335 -1 2
7 0.8335 -1 2
8 0.8335 -1 2
9 0.8335 -1 2
10 0.8335 -1 2
11 0.8335 -1 2
12 0.8335 -1 2
13 0.8335 -1 2
14 0.8335 -1 2
15 0.8335 -1 2
16 0.8335 -1 2
17 0.8335 -1 2
18 0.8335 -1 2
19 3.5 -1 2
20 3.5 -1 2
21 3.5 -1 2

Atoms # full

65 1 12 5.9999999999999998e-02 2.3259279809660896e+02 1.8767981957279210e+02 1.3162353929224361e+02 0 0 0
61 1 12 5.9999999999999998e-02 2.3010954803853281e+02 1.8764221441253520e+02 1.3108887391412878e+02 0 0 0
66 1 12 5.9999999999999998e-02 2.3178648112984570e+02 1.8616434815232523e+02 1.3198035823757402e+02 0 0 0
64 1 12 5.9999999999999998e-02 2.3209774681060105e+02 1.8738432146947665e+02 1.3333182071370521e+02 0 0 0
63 1 14 -1.7999999999999999e-01 2.3186280755635178e+02 1.8720900061670599e+02 1.3228197970142270e+02 0 0 0
500 1 12 5.9999999999999998e-02 1.9250874094667606e+02 1.6013481143800121e+02 1.2985606957921581e+02 0 0 0
498 1 12 5.9999999999999998e-02 1.9113575220357527e+02 1.5787150652979571e+02 1.3135074926693127e+02 0 0 0
492 1 28 2.9999999999999999e-02 1.9306385915226119e+02 1.5760948921611299e+02 1.3275768698433617e+02 0 0 0
496 1 13 -1.2000000000000000e-01 1.9123513142931517e+02 1.5895278935971800e+02 1.3125560791912551e+02 0 0 0
493 1 28 2.9999999999999999e-02 1.9172968869579566e+02 1.5783823491053835e+02 1.3383564616410177e+02 0 0 0
491 1 27 1.9000000000000000e-01 1.9257089661390154e+02 1.5835841833406528e+02 1.3337752096546521e+02 0 0 0
499 1 14 -1.7999999999999999e-01 1.9221372066036375e+02 1.5911169057357941e+02 1.3008906475427619e+02 0 0 0
501 1 12 5.9999999999999998e-02 1.9183996945458318e+02 1.5857176038614293e+02 1.2921907312827813e+02 0 0 0
502 1 12 5.9999999999999998e-02 1.9314684838948190e+02 1.5860925922527170e+02 1.3034388897137279e+02 0 0 0
494 1 29 -5.9999999999999998e-02 1.9185062964694663e+02 1.5954794724606950e+02 1.3265044065438988e+02 0 0 0
497 1 12 5.9999999999999998e-02 1.9024143348645509e+02 1.5935336032680880e+02 1.3105508874479060e+02 0 0 0
439 1 12 5.9999999999999998e-02 1.9454218337817230e+02 1.6344852954140373e+02 1.3143620343938451e+02 0 0 0
495 1 12 5.9999999999999998e-02 1.9254086502313257e+02 1.6029669943853952e+02 1.3226179521220283e+02 0 0 0
438 1 12 5.9999999999999998e-02 1.9330110361505129e+02 1.6450087169134608e+02 1.3176822695015164e+02 0 0 0
436 1 14 -1.7999999999999999e-01 1.9438863668559046e+02 1.6445502841876177e+02 1.3182541202300411e+02 0 0 0
434 1 12 5.9999999999999998e-02 1.9467180564232581e+02 1.6393553500055032e+02 1.3382520609585643e+02 0 0 0
433 1 13 -1.2000000000000000e-01 1.9487366731514325e+02 1.6478648445539795e+02 1.3317463950329554e+02 0 0 0
437 1 12 5.9999999999999998e-02 1.9462962124435435e+02 1.6511491303125490e+02 1.3099199816291164e+02 0 0 0
514 1 12 5.9999999999999998e-02 1.9044960887512661e+02 1.6327709281733024e+02 1.3244173386371705e+02 0 0 0
435 1 12 5.9999999999999998e-02 1.9596320390193404e+02 1.6481405864023787e+02 1.3315883735649922e+02 0 0 0
399 1 12 5.9999999999999998e-02 1.9112221690431144e+02 1.7006224285398676e+02 1.3277998901223475e+02 0 0 0
432 1 12 5.9999999999999998e-02 1.9311950471208183e+02 1.6614548569788857e+02 1.3350308855963172e+02 0 0 0
431 1 11 1.0000000000000001e-01 1.9419233093607534e+02 1.6604042114211958e+02 1.3366466000584958e+02 0 0 0
445 1 12 5.9999999999999998e-02 1.9324856954798304e+02 1.6877818814175410e+02 1.3334006172417847e+02 0 0 0
443 1 13 -1.2000000000000000e-01 1.9431159014010206e+02 1.6867925149358945e+02 1.3355983150336436e+02 0 0 0
442 1 12 5.9999999999999998e-02 1.9448649700971100e+02 1.6712028858977061e+02 1.3195283149564270e+02 0 0 0
440 1 13 -1.2000000000000000e-01 1.9476980570586349e+02 1.6728596671959525e+02 1.3299224813053331e+02 0 0 0
449 1 14 -1.7999999999999999e-01 1.9442747725322931e+02 1.7126058617288126e+02 1.3327686487905481e+02 0 0 0
444 1 12 5.9999999999999998e-02 1.9446117152286976e+02 1.6871027845677349e+02 1.3463907321465427e+02 0 0 0
452 1 12 5.9999999999999998e-02 1.9449688916039796e+02 1.7144004353088772e+02 1.3434974756833486e+02 0 0 0
447 1 12 5.9999999999999998e-02 1.9517518011179166e+02 1.6974561954431658e+02 1.3197405977937828e+02 0 0 0
446 1 13 -1.2000000000000000e-01 1.9508169425041297e+02 1.6986844357746810e+02 1.3305307537482503e+02 0 0 0
448 1 12 5.9999999999999998e-02 1.9609654529329353e+02 1.6985297226136063e+02 1.3345048952425182e+02 0 0 0
398 1 12 5.9999999999999998e-02 1.9080821623275219e+02 1.6845734390474254e+02 1.3216706546400641e+02 0 0 0
451 1 12 5.9999999999999998e-02 1.9336492982805783e+02 1.7126345466765753e+02 1.3303378977078717e+02 0 0 0
450 1 12 5.9999999999999998e-02 1.9498024243202366e+02 1.7205913480404939e+02 1.3278202071825010e+02 0 0 0
441 1 12 5.9999999999999998e-02 1.9585797392903308e+02 1.6725054702548613e+02 1.3293994742983551e+02 0 0 0
373 1 12 5.9999999999999998e-02 2.0090764510272811e+02 1.7201530941824163e+02 1.3467794986458287e+02 0 0 0
233 1 12 5.9999999999999998e-02 2.0422110680426502e+02 1.8513430758708935e+02 1.3208868321272897e+02 0 0 0
229 1 12 5.9999999999999998e-02 2.0639533838851253e+02 1.8614558895113342e+02 1.3229686847247044e+02 0 0 0
204 1 12 5.9999999999999998e-02 2.0682300532613212e+02 1.9034854213454881e+02 1.3096730491366191e+02 0 0 0
243 1 14 -1.7999999999999999e-01 2.1025782356604651e+02 1.8975319601652697e+02 1.3300070886892883e+02 0 0 0
239 1 12 5.9999999999999998e-02 2.0823123832629145e+02 1.8771242321506350e+02 1.3240038758208095e+02 0 0 0
241 1 12 5.9999999999999998e-02 2.1067726491235081e+02 1.8753679072722753e+02 1.3332661174265223e+02 0 0 0
245 1 12 5.9999999999999998e-02 2.1001648195651990e+02 1.8967863403259679e+02 1.3194038121339767e+02 0 0 0
50 1 14 -1.7999999999999999e-01 2.2572815070232184e+02 1.8647379461600741e+02 1.3371203056971945e+02 0 0 0
51 1 12 5.9999999999999998e-02 2.2615444088617249e+02 1.8599005960712299e+02 1.3283318059150062e+02 0 0 0
53 1 12 5.9999999999999998e-02 2.2481552364026058e+02 1.8696236963572616e+02 1.3337070029651352e+02 0 0 0
52 1 12 5.9999999999999998e-02 2.2544123067724726e+02 1.8572539073165100e+02 1.3445072436862989e+02 0 0 0
48 1 12 5.9999999999999998e-02 2.2599451519012382e+02 1.8789735040930123e+02 1.3530181733661342e+02 0 0 0
47 1 13 -1.2000000000000000e-01 2.2658439094626596e+02 1.8746626777835320e+02 1.3449292033021621e+02 0 0 0
49 1 12 5.9999999999999998e-02 2.2743248140026145e+02 1.8697663403626967e+02 1.3497156569914929e+02 0 0 0
201 1 12 5.9999999999999998e-02 2.0649104179750637e+02 1.9292218498457848e+02 1.3064808908663463e+02 0 0 0
202 1 12 5.9999999999999998e-02 2.0487984401380609e+02 1.9212790869969848e+02 1.3029513489818231e+02 0 0 0
200 1 13 -1.2000000000000000e-01 2.0566208434294720e+02 1.9232512081306146e+02 1.3102814748805358e+02 0 0 0
196 1 12 5.9999999999999998e-02 2.0349641759038619e+02 1.9412174744029454e+02 1.3129412166576273e+02 0 0 0
194 1 13 -1.2000000000000000e-01 2.0443492645879928e+02 1.9436750365819393e+02 1.3179101701430179e+02 0 0 0
185 1 29 -5.9999999999999998e-02 2.0408192736486680e+02 1.9517816275034843e+02 1.3301742643794952e+02 0 0 0
197 1 13 -1.2000000000000000e-01 2.0508947971465258e+02 1.9306118155362540e+02 1.3218731780794334e+02 0 0 0
198 1 12 5.9999999999999998e-02 2.0597793517220097e+02 1.9333079189647049e+02 1.3275833190737151e+02 0 0 0
195 1 12 5.9999999999999998e-02 2.0495464296404737e+02 1.9494498385535900e+02 1.3102648355535283e+02 0 0 0
199 1 12 5.9999999999999998e-02 2.0441664688755620e+02 1.9243021107647149e+02 1.3276807035834693e+02 0 0 0
184 1 28 2.9999999999999999e-02 2.0578539111245360e+02 1.9667533098295874e+02 1.3314516507144666e+02 0 0 0
186 1 12 5.9999999999999998e-02 2.0381938395510213e+02 1.9442628654328456e+02 1.3376163953057846e+02 0 0 0
180 1 25 -2.8899999999999998e-01 2.0605210654646993e+02 1.9500103107673206e+02 1.3441469486443538e+02 0 0 0
206 1 12 5.9999999999999998e-02 2.0700968127645532e+02 1.9133074658228159e+02 1.3239186304073641e+02 0 0 0
205 1 12 5.9999999999999998e-02 2.0556859437287457e+02 1.9039751887948691e+02 1.3212107461741718e+02 0 0 0
203 1 14 -1.7999999999999999e-01 2.0629402418715227e+02 1.9104049862624726e+02 1.3162264846455713e+02 0 0 0
179 1 24 -4.9900000000000000e-01 2.0793032064764961e+02 1.9587571729851206e+02 1.3344597817427658e+02 0 0 0
181 1 26 7.1099999999999997e-01 2.0740709769932826e+02 1.9507769318552997e+02 1.3420893585371661e+02 0 0 0
244 1 12 5.9999999999999998e-02 2.1132976051992910e+02 1.8994368224445998e+02 1.3294811366676009e+02 0 0 0
246 1 12 5.9999999999999998e-02 2.0978513238300602e+02 1.9065458871612216e+02 1.3339077959795640e+02 0 0 0
168 1 12 5.9999999999999998e-02 2.1144078193535279e+02 1.9297500988598213e+02 1.2891112275897265e+02 0 0 0
169 1 12 5.9999999999999998e-02 2.1273167064301566e+02 1.9214866463389197e+02 1.2975608750656514e+02 0 0 0
167 1 12 5.9999999999999998e-02 2.1293269516453037e+02 1.9288921403051074e+02 1.2808483712112150e+02 0 0 0
166 1 14 -1.7999999999999999e-01 2.1251633274454952e+02 1.9298245019250601e+02 1.2908785731660518e+02 0 0 0
163 1 13 -1.2000000000000000e-01 2.1283198773232874e+02 1.9431683698805057e+02 1.2976216243192854e+02 0 0 0
174 1 19 -3.7100000000000000e-01 2.0819350524095651e+02 1.9412547700264466e+02 1.3501429269503100e+02 0 0 0
164 1 12 5.9999999999999998e-02 2.1230370146830069e+02 1.9514967475321657e+02 1.2929805589036701e+02 0 0 0
161 1 12 5.9999999999999998e-02 2.1155327299854753e+02 1.9411029951809519e+02 1.3139535312343784e+02 0 0 0
160 1 13 -1.2000000000000000e-01 2.1261301956763532e+02 1.9432972112220236e+02 1.3126538582943579e+02 0 0 0
162 1 12 5.9999999999999998e-02 2.1319800376117487e+02 1.9351952622255052e+02 1.3170067628441092e+02 0 0 0
144 1 8 -4.3600000000000000e-01 2.1494097782142751e+02 1.9409123304722004e+02 1.3338945968894313e+02 0 0 0
14 1 7 1.3700000000000001e-01 2.2463063088368222e+02 1.9225336753650450e+02 1.3426921978328639e+02 0 0 0
9 1 3 -4.9000000000000002e-02 2.2509967961866133e+02 1.9321233698532899e+02 1.3443283787652715e+02 0 0 0
60 1 13 -1.2000000000000000e-01 2.3052325399412129e+02 1.8788074063829384e+02 1.3206869671561208e+02 0 0 0
58 1 12 5.9999999999999998e-02 2.2925059519826181e+02 1.8662667688335998e+02 1.3321725103591842e+02 0 0 0
55 1 12 5.9999999999999998e-02 2.2776455034632929e+02 1.8761837082898998e+02 1.3187778552325958e+02 0 0 0
54 1 13 -1.2000000000000000e-01 2.2814602228338603e+02 1.8832237471043226e+02 1.3261735140822222e+02 0 0 0
62 1 12 5.9999999999999998e-02 2.3073863468862993e+02 1.8894863943287598e+02 1.3203259517162547e+02 0 0 0
57 1 13 -1.2000000000000000e-01 2.2944022461146147e+02 1.8769605967656585e+02 1.3312472467330772e+02 0 0 0
41 1 8 -4.3600000000000000e-01 2.2711329684850941e+02 1.9099908160767734e+02 1.3370939208747063e+02 0 0 0
10 1 4 2.3200000000000001e-01 2.2754697042436194e+02 1.9225726521630747e+02 1.3418216138317277e+02 0 0 0
42 1 9 1.6900000000000001e-01 2.2748959798040721e+02 1.8987338517275393e+02 1.3449980078115075e+02 0 0 0
45 1 11 1.0000000000000001e-01 2.2707497345565662e+02 1.8867374032096237e+02 1.3364528541626800e+02 0 0 0
56 1 12 5.9999999999999998e-02 2.2840898206395809e+02 1.8926306626764264e+02 1.3213356264841909e+02 0 0 0
46 1 12 5.9999999999999998e-02 2.2614243084678239e+02 1.8883272904890146e+02 1.3310381808851653e+02 0 0 0
5 1 5 -7.0000000000000001e-03 2.2890486504726232e+02 1.9258537979980491e+02 1.3416277871453227e+02 0 0 0
1 1 1 -6.2000000000000000e-02 2.3033440686433423e+02 1.9158472065632188e+02 1.3384780327687577e+02 0 0 0
59 1 12 5.9999999999999998e-02 2.2977648378241770e+02 1.8816292671357527e+02 1.3405050269658773e+02 0 0 0
2 1 2 -5.2999999999999999e-02 2.3149694689408480e+02 1.9284356359952338e+02 1.3414123222240804e+02 0 0 0
44 1 10 5.9999999999999998e-02 2.2849963875468458e+02 1.8979998069999945e+02 1.3490295015503233e+02 0 0 0
12 1 6 -1.2100000000000000e-01 2.2655751567035213e+02 1.9331338597703407e+02 1.3435130807576755e+02 0 0 0
1237 1 30 0.0000000000000000e+00 2.3254955874125767e+02 1.9260225723281292e+02 1.3415463134836264e+02 0 0 0
193 1 12 5.9999999999999998e-02 2.0240923943458205e+02 1.9762232347752217e+02 1.3115959136979026e+02 0 0 0
189 1 12 5.9999999999999998e-02 2.0210433510691317e+02 1.9580793715010802e+02 1.3223004612098163e+02 0 0 0
191 1 12 5.9999999999999998e-02 2.0383922114081309e+02 1.9678943988992236e+02 1.3058243826944866e+02 0 0 0
190 1 14 -1.7999999999999999e-01 2.0336687539227853e+02 1.9720594915460634e+02 1.3147210666922581e+02 0 0 0
192 1 12 5.9999999999999998e-02 2.0405817710594184e+02 1.9800125901778534e+02 1.3175082546076109e+02 0 0 0
188 1 12 5.9999999999999998e-02 2.0275707955506317e+02 1.9676893190251602e+02 1.3361728510945167e+02 0 0 0
187 1 13 -1.2000000000000000e-01 2.0298975887734937e+02 1.9624872015399043e+02 1.3268812374489909e+02 0 0 0
183 1 28 2.9999999999999999e-02 2.0477781000615084e+02 1.9644476505032586e+02 1.3456896723737341e+02 0 0 0
182 1 27 1.9000000000000000e-01 2.0524475899983426e+02 1.9593040386448925e+02 1.3372903199535807e+02 0 0 0
165 1 12 5.9999999999999998e-02 2.1386428348553179e+02 1.9458652483178031e+02 1.2953915134506803e+02 0 0 0
158 1 12 5.9999999999999998e-02 2.1222893308352607e+02 1.9585557991234526e+02 1.3275857130867200e+02 0 0 0
157 1 13 -1.2000000000000000e-01 2.1291671445183860e+02 1.9573365385990488e+02 1.3192179719472000e+02 0 0 0
152 1 12 5.9999999999999998e-02 2.1406176063150662e+02 1.9821864823836202e+02 1.3283206091824451e+02 0 0 0
159 1 12 5.9999999999999998e-02 2.1245136654953697e+02 1.9637965273851063e+02 1.3117732638994627e+02 0 0 0
154 1 12 5.9999999999999998e-02 2.1341671021833230e+02 1.9866093921410086e+02 1.3050103744798383e+02 0 0 0
149 1 12 5.9999999999999998e-02 2.1497370018879818e+02 1.9560051474961790e+02 1.3149268651499975e+02 0 0 0
150 1 13 -1.2000000000000000e-01 2.1462072035571583e+02 1.9765402217936642e+02 1.3208582938329133e+02 0 0 0
148 1 11 1.0000000000000001e-01 2.1435866257810235e+02 1.9614295713810182e+02 1.3221072898770277e+02 0 0 0
151 1 12 5.9999999999999998e-02 2.1568965930012044e+02 1.9774552668939833e+02 1.3227843391705329e+02 0 0 0
145 1 9 1.6900000000000001e-01 2.1474298313458436e+02 1.9552190354426736e+02 1.3349463712128406e+02 0 0 0
146 1 10 5.9999999999999998e-02 2.1570750969535720e+02 1.9594425815323856e+02 1.3377642622134863e+02 0 0 0
153 1 14 -1.7999999999999999e-01 2.1443043193651263e+02 1.9830594882124137e+02 1.3068664482746243e+02 0 0 0
156 1 12 5.9999999999999998e-02 2.1469544447845470e+02 1.9762278962081828e+02 1.2987969879897628e+02 0 0 0
155 1 12 5.9999999999999998e-02 2.1505927984658427e+02 1.9919300185979046e+02 1.3061057104165343e+02 0 0 0
3 1 3 -4.9000000000000002e-02 2.3086165020425921e+02 1.9402648623156307e+02 1.3438546865788314e+02 0 0 0
17 1 10 5.9999999999999998e-02 2.2843327668954001e+02 1.9701571411359029e+02 1.3313793094175935e+02 0 0 0
29 1 12 5.9999999999999998e-02 2.2822086114299941e+02 1.9948012868982116e+02 1.3270861525888728e+02 0 0 0
6 1 6 -1.2100000000000000e-01 2.2940483797580808e+02 1.9391378030844123e+02 1.3446907737389552e+02 0 0 0
13 1 7 1.3700000000000001e-01 2.3132581046095646e+02 1.9497922185137952e+02 1.3459343522932110e+02 0 0 0
18 1 10 5.9999999999999998e-02 2.2723225432452182e+02 1.9736461028967881e+02 1.3443579992920053e+02 0 0 0
28 1 13 -1.2000000000000000e-01 2.2813283393157229e+02 1.9963499836970678e+02 1.3378396014092579e+02 0 0 0
36 1 12 5.9999999999999998e-02 2.2721055636874536e+02 2.0191084445338154e+02 1.3233498610841070e+02 0 0 0
40 1 12 5.9999999999999998e-02 2.2765098140782399e+02 2.0418096951816281e+02 1.3284328647890268e+02 0 0 0
37 1 14 -1.7999999999999999e-01 2.2835010017977669e+02 2.0344798532196700e+02 1.3324586207678848e+02 0 0 0
34 1 13 -1.2000000000000000e-01 2.2771574669206669e+02 2.0212134142535137e+02 1.3327762803436082e+02 0 0 0
39 1 12 5.9999999999999998e-02 2.2930429963728091e+02 2.0340070828762452e+02 1.3272110653828503e+02 0 0 0
32 1 12 5.9999999999999998e-02 2.2968802554709146e+02 2.0101993759896530e+02 1.3340351425972000e+02 0 0 0
554 1 12 5.9999999999999998e-02 1.9012154899243347e+02 1.5455173078713091e+02 1.3563437974316884e+02 0 0 0
488 1 24 -4.9900000000000000e-01 1.9373959468153456e+02 1.5684073597868934e+02 1.3529102304545762e+02 0 0 0
490 1 26 7.1099999999999997e-01 1.9403559589243986e+02 1.5799190607024721e+02 1.3528872217453491e+02 0 0 0
489 1 25 -2.8899999999999998e-01 1.9350788058463638e+02 1.5884691261278212e+02 1.3441052285001163e+02 0 0 0
553 1 12 5.9999999999999998e-02 1.9113799204354197e+02 1.5370987867813020e+02 1.3466143904571686e+02 0 0 0
504 1 12 5.9999999999999998e-02 1.9024456614656958e+02 1.5940078930013522e+02 1.3396337563685745e+02 0 0 0
548 1 12 5.9999999999999998e-02 1.9103032928841665e+02 1.5439189268999175e+02 1.3840368393279360e+02 0 0 0
550 1 12 5.9999999999999998e-02 1.9128880385567038e+02 1.5252653337109740e+02 1.3696738690233596e+02 0 0 0
483 1 19 -3.7100000000000000e-01 1.9497513614787198e+02 1.5860204846891094e+02 1.3613139255486070e+02 0 0 0
544 1 12 5.9999999999999998e-02 1.9395177278261806e+02 1.5376644006990989e+02 1.3836900187744459e+02 0 0 0
547 1 12 5.9999999999999998e-02 1.9253655311097702e+02 1.5515628631595462e+02 1.3761756167997717e+02 0 0 0
555 1 12 5.9999999999999998e-02 1.9176058535607868e+02 1.5520725693283069e+02 1.3532598923398407e+02 0 0 0
551 1 12 5.9999999999999998e-02 1.9277766150243565e+02 1.5314453938534703e+02 1.3627895022032317e+02 0 0 0
552 1 14 -1.7999999999999999e-01 1.9118332885908197e+02 1.5431466253953766e+02 1.3556713273028561e+02 0 0 0
549 1 13 -1.2000000000000000e-01 1.9179757069883465e+02 1.5343838535482911e+02 1.3665468492381640e+02 0 0 0
543 1 13 -1.2000000000000000e-01 1.9304391361279900e+02 1.5358006236093797e+02 1.3894272228832429e+02 0 0 0
546 1 13 -1.2000000000000000e-01 1.9200724283610117e+02 1.5425920761086681e+02 1.3793878112958899e+02 0 0 0
484 1 20 4.0799999999999997e-01 1.9575166170812122e+02 1.5800883391722289e+02 1.3708181506003092e+02 0 0 0
487 1 23 -1.8300000000000000e-01 1.9578169622589752e+02 1.5663676833738293e+02 1.3716811461329152e+02 0 0 0
513 1 12 5.9999999999999998e-02 1.9007260577029854e+02 1.6362588595598859e+02 1.3415643695672978e+02 0 0 0
505 1 12 5.9999999999999998e-02 1.9005461896506571e+02 1.6081801717190635e+02 1.3284665941730952e+02 0 0 0
511 1 12 5.9999999999999998e-02 1.9221818232783826e+02 1.6308925107098395e+02 1.3495065695406169e+02 0 0 0
503 1 13 -1.2000000000000000e-01 1.9073653679337934e+02 1.6023830216449920e+02 1.3346876759592544e+02 0 0 0
508 1 12 5.9999999999999998e-02 1.9196707630522769e+02 1.6057677817313146e+02 1.3503669738436767e+02 0 0 0
506 1 13 -1.2000000000000000e-01 1.9123122461900346e+02 1.6118545297472835e+02 1.3451120988392898e+02 0 0 0
509 1 13 -1.2000000000000000e-01 1.9184915161370964e+02 1.6254231465832373e+02 1.3408302974981376e+02 0 0 0
507 1 12 5.9999999999999998e-02 1.9037048107509065e+02 1.6142545535939956e+02 1.3513540490181086e+02 0 0 0
510 1 12 5.9999999999999998e-02 1.9264009949415134e+02 1.6239108997406831e+02 1.3334843291462781e+02 0 0 0
515 1 12 5.9999999999999998e-02 1.9138567252983995e+02 1.6443913986338163e+02 1.3325289827882807e+02 0 0 0
482 1 18 -6.2000000000000000e-02 1.9522902693263904e+02 1.6032725443126409e+02 1.3614757822396840e+02 0 0 0
512 1 14 -1.7999999999999999e-01 1.9086908624650738e+02 1.6349469655656799e+02 1.3342396976124570e+02 0 0 0
485 1 21 -6.8000000000000005e-02 1.9675373243509651e+02 1.5884744729682282e+02 1.3774388267367792e+02 0 0 0
486 1 22 -6.0999999999999999e-02 1.9774072110593514e+02 1.5877285500578108e+02 1.3871963788484683e+02 0 0 0
419 1 1 -6.2000000000000000e-02 1.9672135902415687e+02 1.6340983824414218e+02 1.3634804521940663e+02 0 0 0
481 1 17 7.6999999999999999e-02 1.9653523060111951e+02 1.6021175690910761e+02 1.3729073066993979e+02 0 0 0
480 1 16 -8.6999999999999994e-02 1.9736161176684422e+02 1.6117655590364421e+02 1.3788748740512250e+02 0 0 0
420 1 2 -5.2999999999999999e-02 1.9753890122807337e+02 1.6265141179648916e+02 1.3774591407110535e+02 0 0 0
275 1 17 7.6999999999999999e-02 2.0064681710873646e+02 1.8444775494935320e+02 1.3983824947693518e+02 0 0 0
479 1 15 -6.0000000000000001e-03 1.9847184589041953e+02 1.6027709718004550e+02 1.3890849293582559e+02 0 0 0
421 1 3 -4.9000000000000002e-02 1.9773817899287207e+02 1.6349441788866974e+02 1.3883039825475410e+02 0 0 0
397 1 12 5.9999999999999998e-02 1.8942734919976002e+02 1.6963559468839014e+02 1.3243470780634811e+02 0 0 0
392 1 12 5.9999999999999998e-02 1.8846744388599328e+02 1.6928071644027094e+02 1.3496506660232131e+02 0 0 0
391 1 29 -5.9999999999999998e-02 1.8949424933002595e+02 1.6941726927893305e+02 1.3530436573635828e+02 0 0 0
394 1 12 5.9999999999999998e-02 1.8985433368100851e+02 1.6771571717079223e+02 1.3409613164636286e+02 0 0 0
428 1 9 1.6900000000000001e-01 1.9443380016386621e+02 1.6598781298660830e+02 1.3520875388024845e+02 0 0 0
430 1 10 5.9999999999999998e-02 1.9378989409684144e+02 1.6678401709234294e+02 1.3558230976584619e+02 0 0 0
395 1 12 5.9999999999999998e-02 1.9135237826093282e+02 1.6846490698765797e+02 1.3456591368133053e+02 0 0 0
393 1 13 -1.2000000000000000e-01 1.9033312395293876e+02 1.6868320498976141e+02 1.3424721846875431e+02 0 0 0
388 1 27 1.9000000000000000e-01 1.8971488873455911e+02 1.7097033838807008e+02 1.3542275036214863e+02 0 0 0
396 1 14 -1.7999999999999999e-01 1.9038905028081237e+02 1.6925566584578033e+02 1.3277950514851258e+02 0 0 0
412 1 12 5.9999999999999998e-02 1.9046840773138246e+02 1.6489782874375143e+02 1.3758725484977535e+02 0 0 0
411 1 12 5.9999999999999998e-02 1.9028541828449073e+02 1.6492917066783110e+02 1.3935501855201514e+02 0 0 0
405 1 12 5.9999999999999998e-02 1.9004137151420753e+02 1.6684740139056049e+02 1.3611384198255655e+02 0 0 0
400 1 13 -1.2000000000000000e-01 1.8964435895908423e+02 1.6887150728357653e+02 1.3676448260107844e+02 0 0 0
401 1 12 5.9999999999999998e-02 1.8893659352391319e+02 1.6939423666131884e+02 1.3740785037102111e+02 0 0 0
407 1 12 5.9999999999999998e-02 1.8947039496510445e+02 1.6729864087997163e+02 1.3906410114572628e+02 0 0 0
403 1 13 -1.2000000000000000e-01 1.8953259854829773e+02 1.6735588663398195e+02 1.3693280035658594e+02 0 0 0
406 1 13 -1.2000000000000000e-01 1.9009417043000727e+02 1.6684900871531411e+02 1.3829155012152779e+02 0 0 0
404 1 12 5.9999999999999998e-02 1.8848511285817617e+02 1.6705899420067956e+02 1.3698503829020993e+02 0 0 0
409 1 14 -1.7999999999999999e-01 1.8994358844994545e+02 1.6536920107675914e+02 1.3841820180719560e+02 0 0 0
410 1 12 5.9999999999999998e-02 1.8888578732409854e+02 1.6511008033038294e+02 1.3837333281092498e+02 0 0 0
429 1 10 5.9999999999999998e-02 1.9425939041016503e+02 1.6500114717309827e+02 1.3563790681045290e+02 0 0 0
402 1 12 5.9999999999999998e-02 1.9059238966499043e+02 1.6922093089030733e+02 1.3717343360037779e+02 0 0 0
408 1 12 5.9999999999999998e-02 1.9110538370369324e+02 1.6719914772243771e+02 1.3849879489902213e+02 0 0 0
384 1 23 -1.8300000000000000e-01 1.9284977571460306e+02 1.7001295650597993e+02 1.3729895890282407e+02 0 0 0
427 1 8 -4.3600000000000000e-01 1.9581851771474678e+02 1.6629713695292014e+02 1.3536921495930366e+02 0 0 0
423 1 5 -7.0000000000000001e-03 1.9677237822332489e+02 1.6495212256538517e+02 1.3719820035908418e+02 0 0 0
424 1 6 -1.2100000000000000e-01 1.9734007103459047e+02 1.6481030803241154e+02 1.3850854414914485e+02 0 0 0
341 1 12 5.9999999999999998e-02 1.9545875692766074e+02 1.8169197502403162e+02 1.3968199148935489e+02 0 0 0
425 1 7 1.3700000000000001e-01 1.9573910588427299e+02 1.6893510102090241e+02 1.3628149735869087e+02 0 0 0
415 1 3 -4.9000000000000002e-02 1.9589225368401043e+02 1.6857839178744302e+02 1.3728931890747836e+02 0 0 0
416 1 4 2.3200000000000001e-01 1.9626117758293881e+02 1.6614956744061678e+02 1.3667427072072041e+02 0 0 0
418 1 6 -1.2100000000000000e-01 1.9625149771045710e+02 1.6725247741909436e+02 1.3757379408538011e+02 0 0 0
422 1 4 2.3200000000000001e-01 1.9727632587892901e+02 1.6590381801086394e+02 1.3939349474743565e+02 0 0 0
460 1 12 5.9999999999999998e-02 2.0206004491759495e+02 1.6704196755198217e+02 1.3913956105712151e+02 0 0 0
414 1 2 -5.2999999999999999e-02 1.9584346660295867e+02 1.6932055676921189e+02 1.3836979781077483e+02 0 0 0
413 1 1 -6.2000000000000000e-02 1.9654040035344073e+02 1.6859027037101103e+02 1.3981156497097712e+02 0 0 0
417 1 5 -7.0000000000000001e-03 1.9666206980949161e+02 1.6705954662051565e+02 1.3889444803012171e+02 0 0 0
327 1 10 5.9999999999999998e-02 1.9539450165285848e+02 1.7918895116784003e+02 1.3982485481581418e+02 0 0 0
329 1 12 5.9999999999999998e-02 1.9301234042929187e+02 1.7942749938909273e+02 1.3897854210880419e+02 0 0 0
38 1 12 5.9999999999999998e-02 2.2840740123477528e+02 2.0373808054436384e+02 1.3429498616449402e+02 0 0 0
386 1 25 -2.8899999999999998e-01 1.9105346161073072e+02 1.7128694879946522e+02 1.3570433507221844e+02 0 0 0
390 1 28 2.9999999999999999e-02 1.8953624427913925e+02 1.7146206448057532e+02 1.3446651210370032e+02 0 0 0
385 1 24 -4.9900000000000000e-01 1.9062882677295136e+02 1.7344339085469809e+02 1.3630027768921914e+02 0 0 0
389 1 28 2.9999999999999999e-02 1.8901827838130291e+02 1.7138450938588491e+02 1.3615165123551625e+02 0 0 0
381 1 20 4.0799999999999997e-01 1.9333842100249169e+02 1.7128715823927794e+02 1.3730378819730558e+02 0 0 0
387 1 26 7.1099999999999997e-01 1.9136258192041143e+02 1.7249972428994317e+02 1.3631738859661218e+02 0 0 0
380 1 19 -3.7100000000000000e-01 1.9267903908005792e+02 1.7242684717220541e+02 1.3696873671378464e+02 0 0 0
382 1 21 -6.8000000000000005e-02 1.9467904813635525e+02 1.7153416930861681e+02 1.3783023033671179e+02 0 0 0
379 1 18 -6.2000000000000000e-02 1.9368383820358869e+02 1.7386782580392793e+02 1.3709407857059750e+02 0 0 0
383 1 22 -6.0999999999999999e-02 1.9572750872475044e+02 1.7077965863790655e+02 1.3835834730289810e+02 0 0 0
375 1 12 5.9999999999999998e-02 1.9922212190472592e+02 1.7168601751895972e+02 1.3524299938382583e+02 0 0 0
378 1 17 7.6999999999999999e-02 1.9497853732028915e+02 1.7293370028810045e+02 1.3782176788715284e+02 0 0 0
377 1 16 -8.6999999999999994e-02 1.9623391425946738e+02 1.7329597834151784e+02 1.3825672750085630e+02 0 0 0
316 1 1 -6.2000000000000000e-02 1.9597287255277979e+02 1.7598290464419944e+02 1.3770136133833367e+02 0 0 0
372 1 14 -1.7999999999999999e-01 2.0009140267257195e+02 1.7233862625377367e+02 1.3532394873012777e+02 0 0 0
374 1 12 5.9999999999999998e-02 1.9971974090909657e+02 1.7330077928417705e+02 1.3497148721704141e+02 0 0 0
376 1 15 -6.0000000000000001e-03 1.9711539405997476e+02 1.7176854567774566e+02 1.3852339463031640e+02 0 0 0
317 1 2 -5.2999999999999999e-02 1.9683568841529103e+02 1.7453872825676169e+02 1.3823398745043497e+02 0 0 0
318 1 3 -4.9000000000000002e-02 1.9805959413590895e+02 1.7488594865869436e+02 1.3871100013864395e+02 0 0 0
323 1 7 1.3700000000000001e-01 1.9869882104072056e+02 1.7416207097947466e+02 1.3919451856610291e+02 0 0 0
321 1 6 -1.2100000000000000e-01 1.9838450048580779e+02 1.7623604762735525e+02 1.3879222700604126e+02 0 0 0
371 1 12 5.9999999999999998e-02 1.9964976554144684e+02 1.7300710035267321e+02 1.3728911502202530e+02 0 0 0
368 1 12 5.9999999999999998e-02 2.0164898181585920e+02 1.7431467947143545e+02 1.3647772008189253e+02 0 0 0
369 1 13 -1.2000000000000000e-01 2.0049783810294537e+02 1.7248910375314247e+02 1.3684128415664949e+02 0 0 0
366 1 13 -1.2000000000000000e-01 2.0173118109038091e+02 1.7341556910144106e+02 1.3708841157942445e+02 0 0 0
365 1 12 5.9999999999999998e-02 2.0109806287711541e+02 1.7372497140094535e+02 1.3927573881815965e+02 0 0 0
370 1 12 5.9999999999999998e-02 2.0062666251109763e+02 1.7153307067982763e+02 1.3734873382105260e+02 0 0 0
367 1 12 5.9999999999999998e-02 2.0261692668239067e+02 1.7290637219788707e+02 1.3670857833919246e+02 0 0 0
363 1 13 -1.2000000000000000e-01 2.0197636179176544e+02 1.7372131822933991e+02 1.3863023296441997e+02 0 0 0
359 1 14 -1.7999999999999999e-01 2.0508491736911884e+02 1.7419230203213459e+02 1.3839635396250353e+02 0 0 0
362 1 12 5.9999999999999998e-02 2.0480957141480260e+02 1.7316204637179590e+02 1.3817083704529787e+02 0 0 0
355 1 12 5.9999999999999998e-02 2.0308853036081888e+02 1.7508721145201864e+02 1.3998138042997232e+02 0 0 0
364 1 12 5.9999999999999998e-02 2.0264180575695025e+02 1.7293085685646889e+02 1.3897729958980747e+02 0 0 0
358 1 12 5.9999999999999998e-02 2.0386622111737972e+02 1.7517645859003787e+02 1.3703575405738746e+02 0 0 0
356 1 13 -1.2000000000000000e-01 2.0403416645117946e+02 1.7529917360187449e+02 1.3810572386636940e+02 0 0 0
354 1 11 1.0000000000000001e-01 2.0276544956427787e+02 1.7512543850494038e+02 1.3894106437639471e+02 0 0 0
360 1 12 5.9999999999999998e-02 2.0600653276893291e+02 1.7447188414054119e+02 1.3788590426739603e+02 0 0 0
361 1 12 5.9999999999999998e-02 2.0533725677771622e+02 1.7415725728943855e+02 1.3945616371804780e+02 0 0 0
336 1 12 5.9999999999999998e-02 1.9173813018061909e+02 1.7938917005043601e+02 1.3538056642452347e+02 0 0 0
333 1 14 -1.7999999999999999e-01 1.9192660434760691e+02 1.7967552939527465e+02 1.3641525276462534e+02 0 0 0
334 1 12 5.9999999999999998e-02 1.9196504136198595e+02 1.8074626653271355e+02 1.3621489166356770e+02 0 0 0
330 1 13 -1.2000000000000000e-01 1.9329030410262902e+02 1.7912186760860732e+02 1.3689003982413948e+02 0 0 0
339 1 12 5.9999999999999998e-02 1.9307772102026917e+02 1.8162392728495311e+02 1.3787613906670697e+02 0 0 0
332 1 12 5.9999999999999998e-02 1.9406420174118080e+02 1.7935326919736383e+02 1.3615816816711455e+02 0 0 0
337 1 13 -1.2000000000000000e-01 1.9403249501631782e+02 1.8115747473345183e+02 1.3811889141691967e+02 0 0 0
338 1 12 5.9999999999999998e-02 1.9475667865113832e+02 1.8138254023645032e+02 1.3733594594483597e+02 0 0 0
331 1 12 5.9999999999999998e-02 1.9315401134741839e+02 1.7804956148142045e+02 1.3703033963223334e+02 0 0 0
328 1 11 1.0000000000000001e-01 1.9379877452292916e+02 1.7969266314902433e+02 1.3827192368505359e+02 0 0 0
325 1 9 1.6900000000000001e-01 1.9508258179395619e+02 1.7898978074070135e+02 1.3879960490144188e+02 0 0 0
335 1 12 5.9999999999999998e-02 1.9102777799330391e+02 1.7933679174901161e+02 1.3693048991002817e+02 0 0 0
320 1 5 -7.0000000000000001e-03 1.9731328652504416e+02 1.7698543123373705e+02 1.3823216437801193e+02 0 0 0
319 1 4 2.3200000000000001e-01 1.9952837979077194e+02 1.7685529075148330e+02 1.3929140421631556e+02 0 0 0
350 1 8 -4.3600000000000000e-01 2.0053429674584842e+02 1.7605159421741149e+02 1.3962705359471320e+02 0 0 0
353 1 10 5.9999999999999998e-02 2.0153751291565715e+02 1.7664934446808823e+02 1.3792169998814447e+02 0 0 0
99 1 12 5.9999999999999998e-02 2.2423067436151447e+02 2.0059348028889858e+02 1.3990135254099422e+02 0 0 0
33 1 12 5.9999999999999998e-02 2.2894113652261854e+02 2.0126939488797657e+02 1.3490150408177345e+02 0 0 0
310 1 1 -6.2000000000000000e-02 2.0095740420765324e+02 1.7935250258069061e+02 1.3974059386323623e+02 0 0 0
311 1 2 -5.2999999999999999e-02 1.9987768827478331e+02 1.8077807877074073e+02 1.3947433647385967e+02 0 0 0
312 1 3 -4.9000000000000002e-02 1.9859644099394745e+02 1.8041500782358324e+02 1.3907050021171193e+02 0 0 0
324 1 8 -4.3600000000000000e-01 1.9620698334664092e+02 1.7915477610606538e+02 1.3791430302861781e+02 0 0 0
313 1 4 2.3200000000000001e-01 1.9731406404451400e+02 1.7842691075487585e+02 1.3830670760475027e+02 0 0 0
314 1 5 -7.0000000000000001e-03 1.9955503764971002e+02 1.7828721156811238e+02 1.3931093978371678e+02 0 0 0
315 1 6 -1.2100000000000000e-01 1.9840717720253366e+02 1.7905216853147158e+02 1.3884715591536184e+02 0 0 0
322 1 7 1.3700000000000001e-01 1.9786238748512125e+02 1.8113420425894302e+02 1.3873835275417892e+02 0 0 0
280 1 22 -6.0999999999999999e-02 2.0041964182773629e+02 1.8207732868727982e+02 1.3961268773242782e+02 0 0 0
232 1 12 5.9999999999999998e-02 2.0410817812099461e+02 1.8486856080945293e+02 1.3383177915191101e+02 0 0 0
351 1 9 1.6900000000000001e-01 2.0173556214083533e+02 1.7629203930613809e+02 1.3893224911564502e+02 0 0 0
352 1 10 5.9999999999999998e-02 2.0230733044287274e+02 1.7705124164557421e+02 1.3946590894439424e+02 0 0 0
357 1 12 5.9999999999999998e-02 2.0445955141442826e+02 1.7627278228593013e+02 1.3834910374119335e+02 0 0 0
349 1 12 5.9999999999999998e-02 1.9493710296800884e+02 1.8520340110163582e+02 1.3887360895970315e+02 0 0 0
347 1 12 5.9999999999999998e-02 1.9592468074530669e+02 1.8394507943871190e+02 1.3825519697669759e+02 0 0 0
346 1 14 -1.7999999999999999e-01 1.9488079041630851e+02 1.8422273863504066e+02 1.3840113662281104e+02 0 0 0
348 1 12 5.9999999999999998e-02 1.9443242144116073e+02 1.8420795800129326e+02 1.3740773478385034e+02 0 0 0
545 1 12 5.9999999999999998e-02 1.9293006603275532e+02 1.5251054286780811e+02 1.3911954696766583e+02 0 0 0
326 1 10 5.9999999999999998e-02 1.9471799566569669e+02 1.7796370118693443e+02 1.3875126146590753e+02 0 0 0
426 1 7 1.3700000000000001e-01 1.9815760996611976e+02 1.6320246370789346e+02 1.3978183948520805e+02 0 0 0
458 1 12 5.9999999999999998e-02 1.9973476422437943e+02 1.6736265576531710e+02 1.3934100067566746e+02 0 0 0
270 1 12 5.9999999999999998e-02 1.9809043986482095e+02 1.8734065201688915e+02 1.3553103272303898e+02 0 0 0
272 1 12 5.9999999999999998e-02 1.9721506777376675e+02 1.8676366468334808e+02 1.3677646423686258e+02 0 0 0
269 1 14 -1.7999999999999999e-01 1.9751822456878179e+02 1.8772986530163806e+02 1.3637316256977539e+02 0 0 0
271 1 12 5.9999999999999998e-02 1.9660221578395888e+02 1.8826377928788841e+02 1.3612025076158386e+02 0 0 0
266 1 13 -1.2000000000000000e-01 1.9828400535054431e+02 1.8821296713583962e+02 1.3753308777452784e+02 0 0 0
267 1 12 5.9999999999999998e-02 1.9873029321471481e+02 1.8743329938923199e+02 1.3815037647990053e+02 0 0 0
264 1 12 5.9999999999999998e-02 1.9987315842179015e+02 1.8912323933319851e+02 1.3624740532460825e+02 0 0 0
274 1 16 -8.6999999999999994e-02 2.0180098646124156e+02 1.8421866783648500e+02 1.3909961846529532e+02 0 0 0
31 1 13 -1.2000000000000000e-01 2.2869994223912434e+02 2.0104164222466713e+02 1.3386321026715962e+02 0 0 0
263 1 13 -1.2000000000000000e-01 1.9914540110832687e+02 1.8935534739652596e+02 1.3702496248725416e+02 0 0 0
231 1 12 5.9999999999999998e-02 2.0419605566609550e+02 1.8646312361535206e+02 1.3332862195486760e+02 0 0 0
230 1 14 -1.7999999999999999e-01 2.0457758978503188e+02 1.8547814034006032e+02 1.3305966161648243e+02 0 0 0
227 1 13 -1.2000000000000000e-01 2.0612226871832030e+02 1.8552529305929343e+02 1.3315054636865077e+02 0 0 0
273 1 15 -6.0000000000000001e-03 2.0193646437530802e+02 1.8253110767462886e+02 1.3895590693177752e+02 0 0 0
220 1 7 1.3700000000000001e-01 2.0178088136159548e+02 1.8714098362319078e+02 1.3891345419613307e+02 0 0 0
249 1 10 5.9999999999999998e-02 2.0211580765931043e+02 1.8938407072655761e+02 1.3636351275543052e+02 0 0 0
224 1 10 5.9999999999999998e-02 2.0570400075088415e+02 1.8473762870829867e+02 1.3546550665205183e+02 0 0 0
218 1 6 -1.2100000000000000e-01 2.0370785458299554e+02 1.8711401014718618e+02 1.3797909701308620e+02 0 0 0
217 1 5 -7.0000000000000001e-03 2.0472804202892831e+02 1.8621656221860792e+02 1.3753116054734099e+02 0 0 0
216 1 4 2.3200000000000001e-01 2.0395547806831325e+02 1.8849070888081883e+02 1.3788563566983740e+02 0 0 0
215 1 3 -4.9000000000000002e-02 2.0252445737868911e+02 1.8650827786409408e+02 1.3845174202474374e+02 0 0 0
210 1 4 2.3200000000000001e-01 2.0600845636635700e+02 1.8664865087736391e+02 1.3711430639899837e+02 0 0 0
212 1 6 -1.2100000000000000e-01 2.0632531886979717e+02 1.8804197345160989e+02 1.3726812888080099e+02 0 0 0
222 1 9 1.6900000000000001e-01 2.0668187615286141e+02 1.8521799090955116e+02 1.3549884989308006e+02 0 0 0
221 1 8 -4.3600000000000000e-01 2.0691276901900468e+02 1.8574302392356040e+02 1.3679041769429600e+02 0 0 0
226 1 12 5.9999999999999998e-02 2.0608988559632655e+02 1.8711343611533650e+02 1.3460377011510653e+02 0 0 0
225 1 11 1.0000000000000001e-01 2.0667653329245971e+02 1.8623341028698059e+02 1.3434014344337518e+02 0 0 0
214 1 2 -5.2999999999999999e-02 2.0265761557818865e+02 1.8516350670036908e+02 1.3846912859844184e+02 0 0 0
213 1 1 -6.2000000000000000e-02 2.0408667235528978e+02 1.8455603931589073e+02 1.3757839880886505e+02 0 0 0
238 1 12 5.9999999999999998e-02 2.0799383973676663e+02 1.8881475384304164e+02 1.3378869633734317e+02 0 0 0
228 1 12 5.9999999999999998e-02 2.0651789921371520e+02 1.8452172467783751e+02 1.3299425435351139e+02 0 0 0
236 1 12 5.9999999999999998e-02 2.0878088555385841e+02 1.8580335699698296e+02 1.3394135268802361e+02 0 0 0
237 1 13 -1.2000000000000000e-01 2.0852248590174011e+02 1.8793265107163054e+02 1.3342740975995000e+02 0 0 0
240 1 13 -1.2000000000000000e-01 2.0998905651963008e+02 1.8833199209096901e+02 1.3361318469358787e+02 0 0 0
223 1 10 5.9999999999999998e-02 2.0727931216280820e+02 1.8432959149176625e+02 1.3529411424003587e+02 0 0 0
209 1 3 -4.9000000000000002e-02 2.0762143247222940e+02 1.8870386705923190e+02 1.3710458885796552e+02 0 0 0
219 1 7 1.3700000000000001e-01 2.0850097725992876e+02 1.8812774609819340e+02 1.3685783877248841e+02 0 0 0
234 1 13 -1.2000000000000000e-01 2.0814510532401980e+02 1.8663386365207410e+02 1.3424817875336805e+02 0 0 0
242 1 12 5.9999999999999998e-02 2.1013809188342378e+02 1.8852210587471507e+02 1.3467607942450931e+02 0 0 0
235 1 12 5.9999999999999998e-02 2.0852190142034166e+02 1.8689118384561223e+02 1.3523808295743788e+02 0 0 0
126 1 12 5.9999999999999998e-02 2.1780006776553032e+02 1.8801727470343354e+02 1.3867817237816061e+02 0 0 0
131 1 13 -1.2000000000000000e-01 2.1548700154911216e+02 1.8961158774800674e+02 1.3963461177960480e+02 0 0 0
306 1 14 -1.7999999999999999e-01 1.9410450824332759e+02 1.9180423483085235e+02 1.3913914879544814e+02 0 0 0
303 1 13 -1.2000000000000000e-01 1.9554969149492842e+02 1.9140372831427027e+02 1.3948822878292782e+02 0 0 0
304 1 12 5.9999999999999998e-02 1.9613305608490214e+02 1.9102290078134874e+02 1.3864992319543134e+02 0 0 0
97 1 13 -1.2000000000000000e-01 2.2338832208567220e+02 2.0128460490517432e+02 1.3987152803140009e+02 0 0 0
305 1 12 5.9999999999999998e-02 1.9609111335126696e+02 1.9231932318579530e+02 1.3972623803745662e+02 0 0 0
308 1 12 5.9999999999999998e-02 1.9355816995160183e+02 1.9087860100171216e+02 1.3895799535443203e+02 0 0 0
132 1 12 5.9999999999999998e-02 2.1485837970871785e+02 1.8971296231541535e+02 1.3874993227514162e+02 0 0 0
255 1 12 5.9999999999999998e-02 2.0196491479020909e+02 1.9122698546640936e+02 1.3965939649516656e+02 0 0 0
268 1 12 5.9999999999999998e-02 1.9769333031393452e+02 1.8866659705619824e+02 1.3832896635905564e+02 0 0 0
261 1 12 5.9999999999999998e-02 2.0037713267271121e+02 1.8916085091443864e+02 1.3890527939823136e+02 0 0 0
309 1 12 5.9999999999999998e-02 1.9412814245547273e+02 1.9249547241535197e+02 1.3829669284563448e+02 0 0 0
256 1 14 -1.7999999999999999e-01 2.0058316867201222e+02 1.9292212495286725e+02 1.3925696182082837e+02 0 0 0
265 1 12 5.9999999999999998e-02 1.9847814693034695e+02 1.9005510708105743e+02 1.3652176435983682e+02 0 0 0
260 1 13 -1.2000000000000000e-01 1.9994567065636247e+02 1.8992509628769074e+02 1.3825885094785207e+02 0 0 0
262 1 12 5.9999999999999998e-02 1.9928360361392208e+02 1.9054686855255150e+02 1.3886148388210782e+02 0 0 0
257 1 12 5.9999999999999998e-02 1.9958968282443544e+02 1.9250991224797190e+02 1.3943350234529450e+02 0 0 0
35 1 12 5.9999999999999998e-02 2.2683818283617879e+02 2.0216161879224782e+02 1.3392288723853056e+02 0 0 0
211 1 5 -7.0000000000000001e-03 2.0527959729932778e+02 1.8894414426066012e+02 1.3757508661466960e+02 0 0 0
247 1 8 -4.3600000000000000e-01 2.0294046058941399e+02 1.8927113920089641e+02 1.3826346936330754e+02 0 0 0
535 1 12 5.9999999999999998e-02 1.9326380664927044e+02 1.5544133152793160e+02 1.3981856418965546e+02 0 0 0
259 1 12 5.9999999999999998e-02 2.0041472400439619e+02 1.9373107302995865e+02 1.3854609654597121e+02 0 0 0
252 1 12 5.9999999999999998e-02 2.0069714519361773e+02 1.9141862139499611e+02 1.3692237088497126e+02 0 0 0
251 1 11 1.0000000000000001e-01 2.0114620643407454e+02 1.9088383536226112e+02 1.3775929854105092e+02 0 0 0
253 1 13 -1.2000000000000000e-01 2.0164451598169791e+02 1.9185783360876806e+02 1.3883025514666559e+02 0 0 0
254 1 12 5.9999999999999998e-02 2.0247214250780851e+02 1.9247890511305283e+02 1.3848761169142588e+02 0 0 0
248 1 9 1.6900000000000001e-01 2.0238932446378664e+02 1.9005397423654395e+02 1.3717869239530984e+02 0 0 0
250 1 10 5.9999999999999998e-02 2.0315292682877634e+02 1.9066464793065236e+02 1.3669693614739543e+02 0 0 0
178 1 23 -1.8300000000000000e-01 2.0648267227852082e+02 1.9231314867119121e+02 1.3501484490677024e+02 0 0 0
207 1 1 -6.2000000000000000e-02 2.0583232808034370e+02 1.9064403424876878e+02 1.3752486012322842e+02 0 0 0
175 1 20 4.0799999999999997e-01 2.0774008990995640e+02 1.9280836162487847e+02 1.3533221230991356e+02 0 0 0
208 1 2 -5.2999999999999999e-02 2.0754702810203904e+02 1.9007713606744275e+02 1.3727325334487503e+02 0 0 0
176 1 21 -6.8000000000000005e-02 2.0869410670784444e+02 1.9214583035641505e+02 1.3619025108930825e+02 0 0 0
177 1 22 -6.0999999999999999e-02 2.0864110896915642e+02 1.9101536038996673e+02 1.3700688009383146e+02 0 0 0
173 1 18 -6.2000000000000000e-02 2.0993457873626380e+02 1.9433045069765333e+02 1.3526861667526620e+02 0 0 0
117 1 7 1.3700000000000001e-01 2.1246163058053747e+02 1.9342214992482101e+02 1.3464085479327318e+02 0 0 0
112 1 3 -4.9000000000000002e-02 2.1293910065335373e+02 1.9306943886741161e+02 1.3554308383267832e+02 0 0 0
172 1 17 7.6999999999999999e-02 2.0993966817064506e+02 1.9274660787114180e+02 1.3607909462084831e+02 0 0 0
111 1 2 -5.2999999999999999e-02 2.1238857143261450e+02 1.9235989775439700e+02 1.3662350577830722e+02 0 0 0
171 1 16 -8.6999999999999994e-02 2.1097088535447335e+02 1.9200916268586300e+02 1.3673366853580595e+02 0 0 0
170 1 15 -6.0000000000000001e-03 2.1030042596266023e+02 1.9058259112479041e+02 1.3730659582955872e+02 0 0 0
125 1 12 5.9999999999999998e-02 2.1898386393710075e+02 1.8911581354413298e+02 1.3927076632619637e+02 0 0 0
124 1 13 -1.2000000000000000e-01 2.1797348140523684e+02 1.8875443074456294e+02 1.3946215513393804e+02 0 0 0
115 1 6 -1.2100000000000000e-01 2.1436972109149488e+02 1.9316971271038702e+02 1.3553397967677594e+02 0 0 0
110 1 1 -6.2000000000000000e-02 2.1370294809456584e+02 1.9193522539814273e+02 1.3777450578897060e+02 0 0 0
114 1 5 -7.0000000000000001e-03 2.1487291337428044e+02 1.9267431386382799e+02 1.3674582079921589e+02 0 0 0
109 1 6 -1.2100000000000000e-01 2.1713981932738420e+02 1.9316836226928163e+02 1.3610920113730583e+02 0 0 0
116 1 7 1.3700000000000001e-01 2.1912006671641342e+02 1.9319763804248242e+02 1.3707348837064907e+02 0 0 0
106 1 3 -4.9000000000000002e-02 2.1855340361104930e+02 1.9338854663922723e+02 1.3617412924732398e+02 0 0 0
107 1 4 2.3200000000000001e-01 2.1622716456820939e+02 1.9262097891331072e+02 1.3701302157010795e+02 0 0 0
118 1 8 -4.3600000000000000e-01 2.1667399794047884e+02 1.9219455343342005e+02 1.3821831310110485e+02 0 0 0
122 1 11 1.0000000000000001e-01 2.1692784943430419e+02 1.8997784339882850e+02 1.3934738796855811e+02 0 0 0
119 1 9 1.6900000000000001e-01 2.1704679573569572e+02 1.9082586648773054e+02 1.3808990677703781e+02 0 0 0
121 1 10 5.9999999999999998e-02 2.1807882678732420e+02 1.9077080902166765e+02 1.3774352463834839e+02 0 0 0
120 1 10 5.9999999999999998e-02 2.1645598388857167e+02 1.9038128595541914e+02 1.3728903860565606e+02 0 0 0
113 1 4 2.3200000000000001e-01 2.1533849877916276e+02 1.9364362277190315e+02 1.3454658355702310e+02 0 0 0
105 1 2 -5.2999999999999999e-02 2.1914962617641399e+02 1.9401582754664716e+02 1.3513202851656871e+02 0 0 0
108 1 5 -7.0000000000000001e-03 2.1670323274960779e+02 1.9358717566202833e+02 1.3485035677043658e+02 0 0 0
104 1 1 -6.2000000000000000e-02 2.1802997134263751e+02 1.9418003584424616e+02 1.3384176197053307e+02 0 0 0
67 1 15 -6.0000000000000001e-03 2.2191820865758055e+02 1.9337237142371342e+02 1.3483024224291501e+02 0 0 0
74 1 22 -6.0999999999999999e-02 2.2054976319041432e+02 1.9453682446370482e+02 1.3506743031909022e+02 0 0 0
8 1 2 -5.2999999999999999e-02 2.2446746007526832e+02 1.9436733015084951e+02 1.3474630289003522e+02 0 0 0
43 1 10 5.9999999999999998e-02 2.2685867421824224e+02 1.8995514975441435e+02 1.3538487126395248e+02 0 0 0
147 1 10 5.9999999999999998e-02 2.1404299557598901e+02 1.9573123871744244e+02 1.3430352294662120e+02 0 0 0
75 1 23 -1.8300000000000000e-01 2.1916796369988487e+02 1.9737331081510260e+02 1.3522074527437704e+02 0 0 0
76 1 24 -4.9900000000000000e-01 2.2025211270827364e+02 2.0016157776940904e+02 1.3411240821969642e+02 0 0 0
93 1 12 5.9999999999999998e-02 2.2432632353031582e+02 2.0058748232278330e+02 1.3709986365614105e+02 0 0 0
96 1 12 5.9999999999999998e-02 2.2236217004916892e+02 2.0018394859959463e+02 1.3828512259689248e+02 0 0 0
77 1 25 -2.8899999999999998e-01 2.2197234021126542e+02 2.0020538106759039e+02 1.3550678482241577e+02 0 0 0
72 1 20 4.0799999999999997e-01 2.2049030712845320e+02 1.9720988199523873e+02 1.3507563726754805e+02 0 0 0
73 1 21 -6.8000000000000005e-02 2.2097871289003461e+02 1.9587845887683534e+02 1.3498252637624330e+02 0 0 0
71 1 19 -3.7100000000000000e-01 2.2138755584958849e+02 1.9820125088483326e+02 1.3483580062346473e+02 0 0 0
78 1 26 7.1099999999999997e-01 2.2112547333626779e+02 1.9961917709745623e+02 1.3475941808282488e+02 0 0 0
7 1 1 -6.2000000000000000e-02 2.2566234965937738e+02 1.9564628790315450e+02 1.3500011132325264e+02 0 0 0
69 1 17 7.6999999999999999e-02 2.2242131059330643e+02 1.9589475128772517e+02 1.3480445012129192e+02 0 0 0
68 1 16 -8.6999999999999994e-02 2.2305397721643186e+02 1.9467258109249869e+02 1.3467005787782506e+02 0 0 0
70 1 18 -6.2000000000000000e-02 2.2307030338708890e+02 1.9755233530673382e+02 1.3456227678609653e+02 0 0 0
11 1 5 -7.0000000000000001e-03 2.2704370030125980e+02 1.9460882146255057e+02 1.3467471041931657e+02 0 0 0
4 1 4 2.3200000000000001e-01 2.2838817596816412e+02 1.9489769944930063e+02 1.3470361046621102e+02 0 0 0
16 1 9 1.6900000000000001e-01 2.2828857284010257e+02 1.9725004619595450e+02 1.3419256331396249e+02 0 0 0
19 1 11 1.0000000000000001e-01 2.2890979150267927e+02 1.9859857928694160e+02 1.3455307796289998e+02 0 0 0
30 1 12 5.9999999999999998e-02 2.2705531279098551e+02 1.9953024426701279e+02 1.3391074680238711e+02 0 0 0
26 1 12 5.9999999999999998e-02 2.2719545921570571e+02 2.0014262990339634e+02 1.3657032042832947e+02 0 0 0
27 1 12 5.9999999999999998e-02 2.2767499416745727e+02 1.9901328332708431e+02 1.3775195627104495e+02 0 0 0
25 1 12 5.9999999999999998e-02 2.2674020115225241e+02 1.9846165586658017e+02 1.3638023007383276e+02 0 0 0
24 1 14 -1.7999999999999999e-01 2.2755801621295137e+02 1.9911988604854807e+02 1.3667350734068216e+02 0 0 0
20 1 12 5.9999999999999998e-02 2.2992517011402458e+02 1.9852848383671557e+02 1.3416295887405644e+02 0 0 0
21 1 13 -1.2000000000000000e-01 2.2894995064648586e+02 1.9887764662859837e+02 1.3604975093213784e+02 0 0 0
23 1 12 5.9999999999999998e-02 2.2928385299625444e+02 1.9797945208498464e+02 1.3656922740465438e+02 0 0 0
15 1 8 -4.3600000000000000e-01 2.2889668103831596e+02 1.9619660535393507e+02 1.3497642002440230e+02 0 0 0
22 1 12 5.9999999999999998e-02 2.2957201333357668e+02 1.9975517196930173e+02 1.3622606681319959e+02 0 0 0
79 1 27 1.9000000000000000e-01 2.2199475856597985e+02 2.0162829803424469e+02 1.3545789200332209e+02 0 0 0
80 1 28 2.9999999999999999e-02 2.2200455062406837e+02 2.0205509685234193e+02 1.3445497281775903e+02 0 0 0
87 1 14 -1.7999999999999999e-01 2.2440390630603255e+02 2.0442862453825032e+02 1.3689415061139670e+02 0 0 0
84 1 13 -1.2000000000000000e-01 2.2314754285397319e+02 2.0372153812601675e+02 1.3634118232822919e+02 0 0 0
83 1 12 5.9999999999999998e-02 2.2423114825206471e+02 2.0211125254993348e+02 1.3557749545402618e+02 0 0 0
81 1 28 2.9999999999999999e-02 2.2114447395111827e+02 2.0208704913167188e+02 1.3596253396817232e+02 0 0 0
89 1 12 5.9999999999999998e-02 2.2419785536918548e+02 2.0549752224789518e+02 1.3694983452301190e+02 0 0 0
95 1 12 5.9999999999999998e-02 2.2191437707519506e+02 2.0193553223249955e+02 1.3841282946113267e+02 0 0 0
86 1 12 5.9999999999999998e-02 2.2304165216417843e+02 2.0419023641454172e+02 1.3536281167397073e+02 0 0 0
82 1 29 -5.9999999999999998e-02 2.2330606051619384e+02 2.0222135233150951e+02 1.3614334942727211e+02 0 0 0
92 1 12 5.9999999999999998e-02 2.2454932725766957e+02 2.0204133197631486e+02 1.3789048817429494e+02 0 0 0
91 1 13 -1.2000000000000000e-01 2.2376170866484523e+02 2.0147079687689882e+02 1.3739830277323819e+02 0 0 0
88 1 12 5.9999999999999998e-02 2.2463080117275601e+02 2.0416593484105880e+02 1.3792740415746323e+02 0 0 0
90 1 12 5.9999999999999998e-02 2.2531394899282569e+02 2.0442540497657325e+02 1.3629422397955375e+02 0 0 0
94 1 13 -1.2000000000000000e-01 2.2271681359077382e+02 2.0119944182596103e+02 1.3846147867581024e+02 0 0 0
85 1 12 5.9999999999999998e-02 2.2227769178926783e+02 2.0380661112433168e+02 1.3699250589397312e+02 0 0 0
343 1 13 -1.2000000000000000e-01 1.9408079223592674e+02 1.8337216619411763e+02 1.3943324983904017e+02 0 0 0
461 1 12 5.9999999999999998e-02 2.0141495515670945e+02 1.6550277876260662e+02 1.3917197684291742e+02 0 0 0
459 1 13 -1.2000000000000000e-01 2.0152467832139328e+02 1.6637546886614757e+02 1.3981577264712465e+02 0 0 0
517 1 2 -5.2999999999999999e-02 1.9782517042283382e+02 1.5779368977117559e+02 1.3983676497666758e+02 0 0 0
345 1 12 5.9999999999999998e-02 1.9302437664659953e+02 1.8356524508317159e+02 1.3924668438770442e+02 0 0 0
340 1 13 -1.2000000000000000e-01 1.9440688376999225e+02 1.8185232194314435e+02 1.3944545000076803e+02 0 0 0
139 1 12 5.9999999999999998e-02 2.1281515435123657e+02 1.8992757781856116e+02 1.3994212112115494e+02 0 0 0
98 1 12 5.9999999999999998e-02 2.2367939966841791e+02 2.0233203780454491e+02 1.3995063882247462e+02 0 0 0
307 1 12 5.9999999999999998e-02 1.9357861429281516e+02 1.9238789987064462e+02 1.3989470863726589e+02 0 0 0
528 1 7 1.3700000000000001e-01 1.9579904248610745e+02 1.5713395911503267e+02 1.3990363484370954e+02 0 0 0
583 1 16 -8.6999999999999994e-02 1.9729619631904919e+02 1.5249242118145756e+02 1.4642800976488778e+02 0 0 0
258 1 12 5.9999999999999998e-02 2.0089716579193407e+02 1.9340888893514543e+02 1.4018030717275380e+02 0 0 0
541 1 12 5.9999999999999998e-02 1.9227053042413124e+02 1.5548746747599461e+02 1.4292834553647967e+02 0 0 0
530 1 8 -4.3600000000000000e-01 1.9487772818560293e+02 1.5517464501134370e+02 1.4176814028146086e+02 0 0 0
531 1 9 1.6900000000000001e-01 1.9456217862012352e+02 1.5410910893685042e+02 1.4090950447870802e+02 0 0 0
538 1 12 5.9999999999999998e-02 1.9116795191984332e+02 1.5436125815797638e+02 1.4035314823344672e+02 0 0 0
536 1 13 -1.2000000000000000e-01 1.9195629643187041e+02 1.5436632751623191e+02 1.4110586708947289e+02 0 0 0
539 1 14 -1.7999999999999999e-01 1.9181996983482944e+02 1.5558189164537404e+02 1.4194032770690600e+02 0 0 0
542 1 12 5.9999999999999998e-02 1.9077596336448087e+02 1.5588303956166882e+02 1.4202670159383754e+02 0 0 0
540 1 12 5.9999999999999998e-02 1.9240084827154550e+02 1.5641909796973985e+02 1.4155333180744526e+02 0 0 0
537 1 12 5.9999999999999998e-02 1.9192229432841447e+02 1.5341979804685147e+02 1.4164533519199611e+02 0 0 0
533 1 10 5.9999999999999998e-02 1.9453438062516474e+02 1.5315963989102735e+02 1.4144414069045877e+02 0 0 0
568 1 12 5.9999999999999998e-02 2.0410172031925285e+02 1.5487470428804704e+02 1.4128847832694490e+02 0 0 0
534 1 11 1.0000000000000001e-01 1.9320662056892223e+02 1.5444397219912716e+02 1.4025457350315824e+02 0 0 0
465 1 12 5.9999999999999998e-02 2.0202559167244360e+02 1.6514405120849452e+02 1.4158152538896766e+02 0 0 0
453 1 8 -4.3600000000000000e-01 1.9783744271414179e+02 1.6586954641668345e+02 1.4065197459069310e+02 0 0 0
522 1 1 -6.2000000000000000e-02 1.9595334757367399e+02 1.5339133577624546e+02 1.4425793064432852e+02 0 0 0
523 1 2 -5.2999999999999999e-02 1.9737717035154913e+02 1.5324213442388293e+02 1.4524519491103896e+02 0 0 0
558 1 10 5.9999999999999998e-02 2.0111954174956409e+02 1.5434061135639547e+02 1.4140137308211985e+02 0 0 0
529 1 7 1.3700000000000001e-01 1.9941979036351253e+02 1.5407457477732609e+02 1.4520459841649003e+02 0 0 0
524 1 3 -4.9000000000000002e-02 1.9844158297395214e+02 1.5395631105792742e+02 1.4476241746293883e+02 0 0 0
527 1 6 -1.2100000000000000e-01 1.9816404164675012e+02 1.5457595018397214e+02 1.4348098199022624e+02 0 0 0
526 1 5 -7.0000000000000001e-03 1.9676369755507957e+02 1.5453057108019715e+02 1.4316239103786052e+02 0 0 0
525 1 4 2.3200000000000001e-01 1.9898796265861790e+02 1.5537429533894124e+02 1.4273147723019079e+02 0 0 0
556 1 8 -4.3600000000000000e-01 2.0030852615283624e+02 1.5541830550098530e+02 1.4297705713168671e+02 0 0 0
557 1 9 1.6900000000000001e-01 2.0100216067959315e+02 1.5432586728513633e+02 1.4248493411314499e+02 0 0 0
559 1 10 5.9999999999999998e-02 2.0041723526789877e+02 1.5349544006679278e+02 1.4288034895690288e+02 0 0 0
519 1 4 2.3200000000000001e-01 1.9623582026129850e+02 1.5527255513649450e+02 1.4212835162214043e+02 0 0 0
521 1 6 -1.2100000000000000e-01 1.9707319228547414e+02 1.5619547351194007e+02 1.4141181450912961e+02 0 0 0
520 1 5 -7.0000000000000001e-03 1.9846361438888391e+02 1.5620270411055529e+02 1.4175647279878939e+02 0 0 0
1222 1 12 5.9999999999999998e-02 1.3891205279005521e+02 1.7184057953038817e+02 1.8049695118898828e+02 0 0 0
516 1 1 -6.2000000000000000e-02 1.9930288698336619e+02 1.5743571073608672e+02 1.4080488241332552e+02 0 0 0
301 1 12 5.9999999999999998e-02 1.9489980853662408e+02 1.8962205002030623e+02 1.4041912001185014e+02 0 0 0
129 1 12 5.9999999999999998e-02 2.1911837219656104e+02 1.8760628366728233e+02 1.4094394772297559e+02 0 0 0
128 1 12 5.9999999999999998e-02 2.1838476509566826e+02 1.8909471048998012e+02 1.4162533030550034e+02 0 0 0
276 1 18 -6.2000000000000000e-02 1.9983626135874715e+02 1.8594242263280569e+02 1.4035554962577649e+02 0 0 0
1216 1 12 5.9999999999999998e-02 1.4179278999953385e+02 1.7322211448644541e+02 1.7886431496411990e+02 0 0 0
570 1 12 5.9999999999999998e-02 2.0217017008442002e+02 1.5200555035667318e+02 1.4286433132582667e+02 0 0 0
561 1 12 5.9999999999999998e-02 2.0202573936090573e+02 1.5407246042757845e+02 1.4427607184031893e+02 0 0 0
573 1 12 5.9999999999999998e-02 2.0381702672791860e+02 1.5208099313004416e+02 1.4458304119765941e+02 0 0 0
572 1 13 -1.2000000000000000e-01 2.0423232832265833e+02 1.5233143872162165e+02 1.4360687438047586e+02 0 0 0
576 1 12 5.9999999999999998e-02 2.0507946418875650e+02 1.5119812697144818e+02 1.4195842510215701e+02 0 0 0
569 1 13 -1.2000000000000000e-01 2.0293524123574372e+02 1.5277658759368592e+02 1.4277340291555089e+02 0 0 0
575 1 13 -1.2000000000000000e-01 2.0487155420261246e+02 1.5109009855171999e+02 1.4302294549479487e+02 0 0 0
574 1 12 5.9999999999999998e-02 2.0492717690301561e+02 1.5316552426046789e+02 1.4370478711718278e+02 0 0 0
571 1 12 5.9999999999999998e-02 2.0309418572212468e+02 1.5282465352822047e+02 1.4169612563855043e+02 0 0 0
560 1 11 1.0000000000000001e-01 2.0229692068538219e+02 1.5411213731097288e+02 1.4322109011811744e+02 0 0 0
563 1 12 5.9999999999999998e-02 2.0407633205299450e+02 1.5524404903039311e+02 1.4372272372801808e+02 0 0 0
564 1 12 5.9999999999999998e-02 2.0262941078931186e+02 1.5618124403658425e+02 1.4368728482095167e+02 0 0 0
562 1 13 -1.2000000000000000e-01 2.0313676902619173e+02 1.5535924401140039e+02 1.4318230590458390e+02 0 0 0
473 1 12 5.9999999999999998e-02 2.0164035925520110e+02 1.6970700677591248e+02 1.4292899464541253e+02 0 0 0
467 1 12 5.9999999999999998e-02 1.9915412123253557e+02 1.6838476435179490e+02 1.4108379456308305e+02 0 0 0
477 1 12 5.9999999999999998e-02 1.9970031215966259e+02 1.7148099621966091e+02 1.4130990339715106e+02 0 0 0
476 1 12 5.9999999999999998e-02 1.9911086763657934e+02 1.7031603865192110e+02 1.4248679057448120e+02 0 0 0
474 1 12 5.9999999999999998e-02 2.0191108609215257e+02 1.7102279496982584e+02 1.4176321296133412e+02 0 0 0
472 1 13 -1.2000000000000000e-01 2.0126237476132522e+02 1.7018736028934416e+02 1.4202650463100983e+02 0 0 0
567 1 12 5.9999999999999998e-02 2.0425571496313663e+02 1.5662701902090382e+02 1.4175513600069263e+02 0 0 0
469 1 13 -1.2000000000000000e-01 2.0120137549983872e+02 1.6916798232802290e+02 1.4089353081742146e+02 0 0 0
566 1 12 5.9999999999999998e-02 2.0275737513377305e+02 1.5603328868892908e+02 1.4109887055384601e+02 0 0 0
475 1 14 -1.7999999999999999e-01 1.9994838379553150e+02 1.7096825186498447e+02 1.4223923315503379e+02 0 0 0
466 1 13 -1.2000000000000000e-01 2.0018385444739789e+02 1.6805422942490682e+02 1.4121979535259649e+02 0 0 0
478 1 12 5.9999999999999998e-02 2.0000824516554192e+02 1.7166866765332722e+02 1.4307226037515227e+02 0 0 0
457 1 11 1.0000000000000001e-01 2.0014842863615399e+02 1.6688517700559291e+02 1.4022925502462587e+02 0 0 0
1212 1 27 1.9000000000000000e-01 1.4051560048580814e+02 1.7462570230093127e+02 1.7782521019297934e+02 0 0 0
102 1 12 5.9999999999999998e-02 2.2204350761627600e+02 1.9987820727455974e+02 1.4085698289485052e+02 0 0 0
302 1 12 5.9999999999999998e-02 1.9506132449776317e+02 1.9087848601412864e+02 1.4155700467388940e+02 0 0 0
298 1 12 5.9999999999999998e-02 1.9727022780418068e+02 1.8956996682630685e+02 1.4020766838629481e+02 0 0 0
468 1 12 5.9999999999999998e-02 2.0028388214626361e+02 1.6780377040425302e+02 1.4227590413110724e+02 0 0 0
464 1 12 5.9999999999999998e-02 2.0246813971003988e+02 1.6682615129066215e+02 1.4175354218770514e+02 0 0 0
279 1 21 -6.8000000000000005e-02 1.9985120667975357e+02 1.8326732589776944e+02 1.4013365869990363e+02 0 0 0
462 1 14 -1.7999999999999999e-01 2.0243957600423008e+02 1.6599802366311354e+02 1.4104538348537676e+02 0 0 0
300 1 13 -1.2000000000000000e-01 1.9555251244251036e+02 1.9045480434616729e+02 1.4068103193331220e+02 0 0 0
565 1 14 -1.7999999999999999e-01 2.0361058044006700e+02 1.5574936035385707e+02 1.4171492703871075e+02 0 0 0
101 1 12 5.9999999999999998e-02 2.2298704261366248e+02 2.0101713389202848e+02 1.4206034112104092e+02 0 0 0
1215 1 29 -5.9999999999999998e-02 1.4107539840245380e+02 1.7320689023787591e+02 1.7804381662853689e+02 0 0 0
100 1 14 -1.7999999999999999e-01 2.2250311160392502e+02 2.0083608109100885e+02 1.4110058538061861e+02 0 0 0
127 1 14 -1.7999999999999999e-01 2.1825603290168183e+02 1.8827258597008975e+02 1.4092131369648683e+02 0 0 0
287 1 28 2.9999999999999999e-02 1.9576465876030875e+02 1.8730762555185035e+02 1.4283886985293370e+02 0 0 0
455 1 10 5.9999999999999998e-02 1.9954112709513788e+02 1.6479393012936561e+02 1.4029578256234612e+02 0 0 0
295 1 12 5.9999999999999998e-02 1.9823487039174859e+02 1.8722158610621523e+02 1.4418979872974143e+02 0 0 0
282 1 24 -4.9900000000000000e-01 1.9625007182716223e+02 1.8506211029311950e+02 1.4177863600398211e+02 0 0 0
283 1 25 -2.8899999999999998e-01 1.9744834857371492e+02 1.8691236938143800e+02 1.4157001054929879e+02 0 0 0
292 1 12 5.9999999999999998e-02 1.9902798546075641e+02 1.8873543113599106e+02 1.4241192784142135e+02 0 0 0
285 1 27 1.9000000000000000e-01 1.9638374443479793e+02 1.8769346687169744e+02 1.4202895652638512e+02 0 0 0
284 1 26 7.1099999999999997e-01 1.9727213171349308e+02 1.8564781684433328e+02 1.4139565544548108e+02 0 0 0
277 1 19 -3.7100000000000000e-01 1.9844910052421505e+02 1.8500886222149714e+02 1.4095404976382250e+02 0 0 0
1218 1 12 5.9999999999999998e-02 1.4014450384382522e+02 1.7129547979873286e+02 1.7856950898463876e+02 0 0 0
281 1 23 -1.8300000000000000e-01 1.9765994368487799e+02 1.8279844375897076e+02 1.4102179308452932e+02 0 0 0
296 1 12 5.9999999999999998e-02 1.9740850097496798e+02 1.8861597872475025e+02 1.4489977577390576e+02 0 0 0
289 1 12 5.9999999999999998e-02 1.9618167997656920e+02 1.8939449715145466e+02 1.4318963391620969e+02 0 0 0
297 1 13 -1.2000000000000000e-01 1.9692470663474620e+02 1.9007019006800687e+02 1.4111237376951308e+02 0 0 0
294 1 12 5.9999999999999998e-02 1.9915222901302138e+02 1.8843875469307144e+02 1.4496080676243125e+02 0 0 0
293 1 14 -1.7999999999999999e-01 1.9827876090198160e+02 1.8830250591424590e+02 1.4432316285842131e+02 0 0 0
290 1 13 -1.2000000000000000e-01 1.9823868023120056e+02 1.8909426738296244e+02 1.4307248351866011e+02 0 0 0
288 1 29 -5.9999999999999998e-02 1.9686360782921508e+02 1.8912700997493707e+02 1.4238246292181975e+02 0 0 0
291 1 12 5.9999999999999998e-02 1.9852355804346689e+02 1.9011073119570585e+02 1.4334404559090828e+02 0 0 0
299 1 12 5.9999999999999998e-02 1.9749673398968312e+02 1.9096292238174524e+02 1.4136518561716241e+02 0 0 0
1209 1 24 -4.9900000000000000e-01 1.4026731639977143e+02 1.7721417472537925e+02 1.7721286466149013e+02 0 0 0
140 1 14 -1.7999999999999999e-01 2.1255432979086589e+02 1.9125090280877589e+02 1.4161877875368421e+02 0 0 0
141 1 12 5.9999999999999998e-02 2.1149781526917110e+02 1.9111446260659054e+02 1.4184956347805192e+02 0 0 0
143 1 12 5.9999999999999998e-02 2.1259848019390327e+02 1.9217294021754259e+02 1.4103912536667400e+02 0 0 0
138 1 12 5.9999999999999998e-02 2.1340301326393549e+02 1.8921105798875305e+02 1.4150291828470716e+02 0 0 0
142 1 12 5.9999999999999998e-02 2.1308571088778535e+02 1.9139912663386701e+02 1.4255886589339397e+02 0 0 0
136 1 12 5.9999999999999998e-02 2.1523238992792312e+02 1.9058891521876805e+02 1.4166192174939775e+02 0 0 0
137 1 13 -1.2000000000000000e-01 2.1337463518917818e+02 1.9009288393093277e+02 1.4086285754095090e+02 0 0 0
130 1 12 5.9999999999999998e-02 2.1740503377333127e+02 1.8772123385386899e+02 1.4132120283524083e+02 0 0 0
342 1 12 5.9999999999999998e-02 1.9383486035038376e+02 1.8152358869209030e+02 1.4031310412736232e+02 0 0 0
134 1 13 -1.2000000000000000e-01 2.1478809290596948e+02 1.9048564975424804e+02 1.4067195386610501e+02 0 0 0
463 1 12 5.9999999999999998e-02 2.0347099092616918e+02 1.6586720037425775e+02 1.4071801744162158e+02 0 0 0
344 1 12 5.9999999999999998e-02 1.9430000808357948e+02 1.8379218638610934e+02 1.4041489512338438e+02 0 0 0
286 1 28 2.9999999999999999e-02 1.9562761858720270e+02 1.8764580790970658e+02 1.4124530971293612e+02 0 0 0
1219 1 12 5.9999999999999998e-02 1.3902497635951784e+02 1.7246584859141660e+02 1.7792762301556286e+02 0 0 0
1229 1 12 5.9999999999999998e-02 1.4211500853835105e+02 1.7063630148593381e+02 1.7765301275372519e+02 0 0 0
1221 1 12 5.9999999999999998e-02 1.4037516060655489e+02 1.7275860815444199e+02 1.8069645773316665e+02 0 0 0
456 1 10 5.9999999999999998e-02 1.9946457361860030e+02 1.6559219782584245e+02 1.4181472009303914e+02 0 0 0
1204 1 19 -3.7100000000000000e-01 1.4261133557492300e+02 1.7733703954728517e+02 1.7673468396521704e+02 0 0 0
454 1 9 1.6900000000000001e-01 1.9923506373515886e+02 1.6573223273289861e+02 1.4075839843830144e+02 0 0 0
1208 1 23 -1.8300000000000000e-01 1.4214430365285995e+02 1.7943905428260931e+02 1.7776806797941867e+02 0 0 0
1223 1 12 5.9999999999999998e-02 1.3883690081957752e+02 1.7347996829760277e+02 1.8013392166034345e+02 0 0 0
278 1 20 4.0799999999999997e-01 1.9858623901730721e+02 1.8366345921361361e+02 1.4067888419177120e+02 0 0 0
103 1 12 5.9999999999999998e-02 2.2170546447301024e+02 2.0157826398444735e+02 1.4106859148588512e+02 0 0 0
1211 1 26 7.1099999999999997e-01 1.4134502071176431e+02 1.7668654912566885e+02 1.7712088203566347e+02 0 0 0
658 1 12 5.9999999999999998e-02 1.9845552888844784e+02 1.4545720645728403e+02 1.4795215732994737e+02 0 0 0
657 1 12 5.9999999999999998e-02 1.9745651508691844e+02 1.4680103520914616e+02 1.4829146092936267e+02 0 0 0
656 1 12 5.9999999999999998e-02 1.9693204632214147e+02 1.4529809452452889e+02 1.4882859523146954e+02 0 0 0
655 1 14 -1.7999999999999999e-01 1.9784428752435039e+02 1.4588876377499432e+02 1.4874477468818182e+02 0 0 0
653 1 12 5.9999999999999998e-02 1.9900008056347014e+02 1.4516610160410255e+02 1.5021936471885124e+02 0 0 0
652 1 13 -1.2000000000000000e-01 1.9852758914649763e+02 1.4613328345809151e+02 1.5004786811548041e+02 0 0 0
654 1 12 5.9999999999999998e-02 1.9930348149449310e+02 1.4688266514995055e+02 1.4989128540832857e+02 0 0 0
651 1 12 5.9999999999999998e-02 1.9682338396055002e+02 1.4561855316634194e+02 1.5122720987468628e+02 0 0 0
650 1 12 5.9999999999999998e-02 1.9676083645322203e+02 1.4707871305614535e+02 1.5058101185620325e+02 0 0 0
649 1 13 -1.2000000000000000e-01 1.9748286013777440e+02 1.4648184962993687e+02 1.5113826909716286e+02 0 0 0
601 1 12 5.9999999999999998e-02 2.0353211242139412e+02 1.4639028252773258e+02 1.4737303049560876e+02 0 0 0
785 1 12 5.9999999999999998e-02 1.8457324255311960e+02 1.4628468543863801e+02 1.5326840180417008e+02 0 0 0
679 1 12 5.9999999999999998e-02 1.8618012189990739e+02 1.5221977262570817e+02 1.4993160050243068e+02 0 0 0
623 1 5 -7.0000000000000001e-03 1.9303040193806623e+02 1.5022148308678081e+02 1.5052251285082025e+02 0 0 0
619 1 1 -6.2000000000000000e-02 1.9355845184710688e+02 1.5134569647440102e+02 1.4928526012214931e+02 0 0 0
628 1 4 2.3200000000000001e-01 1.9179828660061824e+02 1.5027295297348772e+02 1.5121136895073766e+02 0 0 0
659 1 8 -4.3600000000000000e-01 1.9077965294577916e+02 1.5112263204860824e+02 1.5098721904396541e+02 0 0 0
661 1 10 5.9999999999999998e-02 1.9189296193584886e+02 1.5287811087116768e+02 1.5126846321405975e+02 0 0 0
660 1 9 1.6900000000000001e-01 1.9098233528058290e+02 1.5237388677520477e+02 1.5159190904962421e+02 0 0 0
673 1 12 5.9999999999999998e-02 1.8838381297724493e+02 1.5187306619638076e+02 1.5099466537460373e+02 0 0 0
585 1 18 -6.2000000000000000e-02 1.9985922338364429e+02 1.5120551601616731e+02 1.4683215967851655e+02 0 0 0
622 1 4 2.3200000000000001e-01 1.9399560486726853e+02 1.4842752007890940e+02 1.5193064061516705e+02 0 0 0
582 1 15 -6.0000000000000001e-03 1.9571305112357012e+02 1.5228514515648638e+02 1.4717773182061666e+02 0 0 0
584 1 17 7.6999999999999999e-02 1.9818981222726990e+02 1.5170299964452988e+02 1.4716555874665883e+02 0 0 0
586 1 19 -3.7100000000000000e-01 1.9990572211601327e+02 1.5027615091222833e+02 1.4832860260067429e+02 0 0 0
587 1 20 4.0799999999999997e-01 1.9863487070184382e+02 1.5018936145979583e+02 1.4885558460442260e+02 0 0 0
588 1 21 -6.8000000000000005e-02 1.9758784097022422e+02 1.5094117711061986e+02 1.4820638710461731e+02 0 0 0
589 1 22 -6.0999999999999999e-02 1.9621357379367731e+02 1.5107521359737774e+02 1.4827183378295356e+02 0 0 0
620 1 2 -5.2999999999999999e-02 1.9524150900604624e+02 1.5066257639080516e+02 1.4928504114999205e+02 0 0 0
624 1 6 -1.2100000000000000e-01 1.9413454697263882e+02 1.4939829181582246e+02 1.5091693651598845e+02 0 0 0
621 1 3 -4.9000000000000002e-02 1.9526714647116583e+02 1.4957532390421133e+02 1.5009266399243029e+02 0 0 0
633 1 8 -4.3600000000000000e-01 1.9501607360517630e+02 1.4755387536062537e+02 1.5223492359492312e+02 0 0 0
590 1 23 -1.8300000000000000e-01 1.9838042986163754e+02 1.4980290892742224e+02 1.5016841398049152e+02 0 0 0
631 1 7 1.3700000000000001e-01 1.9613856188916827e+02 1.4894767700997696e+02 1.5020709539295282e+02 0 0 0
605 1 12 5.9999999999999998e-02 2.0533870125264218e+02 1.4679880598320463e+02 1.4911932857876664e+02 0 0 0
604 1 12 5.9999999999999998e-02 2.0550241218412697e+02 1.4787042882353600e+02 1.4767227901137807e+02 0 0 0
593 1 26 7.1099999999999997e-01 2.0108439936925475e+02 1.4989707807817192e+02 1.4899988136349594e+02 0 0 0
600 1 12 5.9999999999999998e-02 2.0301747011711453e+02 1.4806687524143626e+02 1.4756315587804588e+02 0 0 0
603 1 12 5.9999999999999998e-02 2.0478954434717778e+02 1.4848703967688240e+02 1.4901657239437924e+02 0 0 0
608 1 12 5.9999999999999998e-02 2.0355909927567228e+02 1.4490122108401798e+02 1.4948040242090252e+02 0 0 0
599 1 13 -1.2000000000000000e-01 2.0345124722490212e+02 1.4721295610611352e+02 1.4808350146859908e+02 0 0 0
602 1 14 -1.7999999999999999e-01 2.0485350390685883e+02 1.4753879949233999e+02 1.4848285924189179e+02 0 0 0
595 1 28 2.9999999999999999e-02 2.0297589782050338e+02 1.4861548086483575e+02 1.5048520489608597e+02 0 0 0
594 1 27 1.9000000000000000e-01 2.0214325342410822e+02 1.4796991254528822e+02 1.5020583979694632e+02 0 0 0
596 1 28 2.9999999999999999e-02 2.0184988950006505e+02 1.4748071513265617e+02 1.5113466889835058e+02 0 0 0
592 1 25 -2.8899999999999998e-01 2.0101784780329029e+02 1.4865329774815490e+02 1.4965718278795092e+02 0 0 0
591 1 24 -4.9900000000000000e-01 2.0205461069703182e+02 1.5060034499848194e+02 1.4896867073153106e+02 0 0 0
607 1 12 5.9999999999999998e-02 2.0384859476160369e+02 1.4603629036785586e+02 1.5084782328399461e+02 0 0 0
597 1 29 -5.9999999999999998e-02 2.0245513163391229e+02 1.4677514122403562e+02 1.4925007660735369e+02 0 0 0
606 1 13 -1.2000000000000000e-01 2.0311384496933564e+02 1.4563964505327775e+02 1.5014716975957936e+02 0 0 0
598 1 12 5.9999999999999998e-02 2.0150172702259181e+02 1.4647520291163130e+02 1.4881515517092529e+02 0 0 0
684 1 12 5.9999999999999998e-02 1.8469016325863691e+02 1.5391034692745583e+02 1.4967310602544066e+02 0 0 0
683 1 12 5.9999999999999998e-02 1.8380803692134953e+02 1.5269751680826749e+02 1.5060487514974082e+02 0 0 0
681 1 14 -1.7999999999999999e-01 1.8465043247865395e+02 1.5338879684441062e+02 1.5062940460652695e+02 0 0 0
682 1 12 5.9999999999999998e-02 1.8440690573608364e+02 1.5415508885639824e+02 1.5136533344547598e+02 0 0 0
677 1 12 5.9999999999999998e-02 1.8702632733464844e+02 1.5426247459220113e+02 1.5205154077635339e+02 0 0 0
675 1 13 -1.2000000000000000e-01 1.8725772260904091e+02 1.5371856366060285e+02 1.5113572575208559e+02 0 0 0
678 1 13 -1.2000000000000000e-01 1.8602393310769972e+02 1.5276051664942986e+02 1.5086503553578615e+02 0 0 0
670 1 12 5.9999999999999998e-02 1.9232472148882326e+02 1.5518827730825234e+02 1.5207720017037303e+02 0 0 0
664 1 12 5.9999999999999998e-02 1.8991267163966401e+02 1.5342022228352479e+02 1.5026868698976227e+02 0 0 0
669 1 12 5.9999999999999998e-02 1.9128550317545117e+02 1.5657995926736243e+02 1.5192875203636606e+02 0 0 0
663 1 11 1.0000000000000001e-01 1.8986585776364555e+02 1.5334147403485429e+02 1.5135483024658595e+02 0 0 0
676 1 12 5.9999999999999998e-02 1.8731570843051568e+02 1.5429064746598783e+02 1.5020973379915870e+02 0 0 0
668 1 14 -1.7999999999999999e-01 1.9135582642920181e+02 1.5551638665510887e+02 1.5170078712898874e+02 0 0 0
665 1 13 -1.2000000000000000e-01 1.9010630311477499e+02 1.5471142014552265e+02 1.5212292250704130e+02 0 0 0
671 1 12 5.9999999999999998e-02 1.9140729721414684e+02 1.5547039799892516e+02 1.5061297473653005e+02 0 0 0
581 1 12 5.9999999999999998e-02 2.0400736547835191e+02 1.4960621118327623e+02 1.4443308484325382e+02 0 0 0
578 1 14 -1.7999999999999999e-01 2.0402384632190541e+02 1.4984860770960009e+02 1.4337050669312410e+02 0 0 0
580 1 12 5.9999999999999998e-02 2.0298686808905310e+02 1.4995720638802527e+02 1.4305272907832457e+02 0 0 0
577 1 12 5.9999999999999998e-02 2.0575743778787799e+02 1.5102294869312021e+02 1.4365445256168141e+02 0 0 0
579 1 12 5.9999999999999998e-02 2.0448423885782444e+02 1.4891604471525764e+02 1.4304421698010253e+02 0 0 0
648 1 12 5.9999999999999998e-02 1.9878891317804027e+02 1.4630502026540063e+02 1.5271057480610492e+02 0 0 0
646 1 13 -1.2000000000000000e-01 1.9806194408176290e+02 1.4707300732449966e+02 1.5244635525234671e+02 0 0 0
638 1 12 5.9999999999999998e-02 1.9671851820325367e+02 1.4612588116822994e+02 1.5365516191637158e+02 0 0 0
645 1 12 5.9999999999999998e-02 1.9867141894323743e+02 1.4562547202530266e+02 1.5528592859143146e+02 0 0 0
637 1 11 1.0000000000000001e-01 1.9708004639668556e+02 1.4715233051691229e+02 1.5359352507719728e+02 0 0 0
642 1 14 -1.7999999999999999e-01 1.9889275346341012e+02 1.4668606431038813e+02 1.5540532629645926e+02 0 0 0
643 1 12 5.9999999999999998e-02 1.9927275236054348e+02 1.4698119591609992e+02 1.5638338467188953e+02 0 0 0
644 1 12 5.9999999999999998e-02 1.9972291936370007e+02 1.4670240501016613e+02 1.5469916942816454e+02 0 0 0
614 1 12 5.9999999999999998e-02 2.0258088652178998e+02 1.4287186573345031e+02 1.5064852461533425e+02 0 0 0
720 1 12 5.9999999999999998e-02 1.9588540005258531e+02 1.4793537577800558e+02 1.6098624918308542e+02 0 0 0
616 1 12 5.9999999999999998e-02 2.0152688282273701e+02 1.4186874741802112e+02 1.5242354943715353e+02 0 0 0
613 1 12 5.9999999999999998e-02 2.0343392694980903e+02 1.4358127948214178e+02 1.5206652620195740e+02 0 0 0
772 1 12 5.9999999999999998e-02 1.7845396710539671e+02 1.5001132159923273e+02 1.5795542165975939e+02 0 0 0
773 1 12 5.9999999999999998e-02 1.7789056938005939e+02 1.4839570570135140e+02 1.5782506447452178e+02 0 0 0
771 1 14 -1.7999999999999999e-01 1.7879773039024340e+02 1.4897747700585620e+02 1.5798846952601988e+02 0 0 0
774 1 12 5.9999999999999998e-02 1.7915195201031526e+02 1.4891793113030320e+02 1.5901758629945726e+02 0 0 0
768 1 13 -1.2000000000000000e-01 1.7985382055078412e+02 1.4866106513797280e+02 1.5695634313131026e+02 0 0 0
786 1 12 5.9999999999999998e-02 1.8324656985138148e+02 1.4543905733180122e+02 1.5425453424652591e+02 0 0 0
770 1 12 5.9999999999999998e-02 1.7928005066375343e+02 1.4862435986490462e+02 1.5603030814141030e+02 0 0 0
767 1 12 5.9999999999999998e-02 1.8070316910739385e+02 1.5059713156149263e+02 1.5678010306681233e+02 0 0 0
769 1 12 5.9999999999999998e-02 1.8010352147521314e+02 1.4760266704187848e+02 1.5703079376044451e+02 0 0 0
722 1 1 -6.2000000000000000e-02 1.8536773368019132e+02 1.4932389250809385e+02 1.5709260888124263e+02 0 0 0
780 1 12 5.9999999999999998e-02 1.8305964215756131e+02 1.4767149448409370e+02 1.5601670337036182e+02 0 0 0
765 1 10 5.9999999999999998e-02 1.8259576289916257e+02 1.4854791211920607e+02 1.5795490135817502e+02 0 0 0
766 1 11 1.0000000000000001e-01 1.8102043691981422e+02 1.4955505086075200e+02 1.5681894825114657e+02 0 0 0
763 1 9 1.6900000000000001e-01 1.8197032587669696e+02 1.4943265012397606e+02 1.5807392738086841e+02 0 0 0
779 1 12 5.9999999999999998e-02 1.8162778036840194e+02 1.4711604306861577e+02 1.5559525239940180e+02 0 0 0
778 1 13 -1.2000000000000000e-01 1.8231686295998594e+02 1.4788606718686816e+02 1.5524836908496485e+02 0 0 0
787 1 12 5.9999999999999998e-02 1.8458760749380232e+02 1.4651196575962152e+02 1.5492637660257589e+02 0 0 0
781 1 13 -1.2000000000000000e-01 1.8298981179791772e+02 1.4754886898632793e+02 1.5394266851066627e+02 0 0 0
784 1 14 -1.7999999999999999e-01 1.8388783316311853e+02 1.4630944316548658e+02 1.5411557422537939e+02 0 0 0
783 1 12 5.9999999999999998e-02 1.8367049233915955e+02 1.4833944135334286e+02 1.5362680565003646e+02 0 0 0
782 1 12 5.9999999999999998e-02 1.8234822245414117e+02 1.4728047049684594e+02 1.5310336798497639e+02 0 0 0
775 1 13 -1.2000000000000000e-01 1.8175727523038105e+02 1.4935701387499864e+02 1.5542493540491739e+02 0 0 0
777 1 12 5.9999999999999998e-02 1.8248296687571894e+02 1.5014574162145016e+02 1.5522648846014721e+02 0 0 0
776 1 12 5.9999999999999998e-02 1.8122906006836482e+02 1.4957571176289119e+02 1.5449689402137116e+02 0 0 0
764 1 10 5.9999999999999998e-02 1.8138718404147323e+02 1.4928423005745867e+02 1.5898278222142025e+02 0 0 0
680 1 12 5.9999999999999998e-02 1.8587127286292906e+02 1.5190355701498672e+02 1.5152109589836991e+02 0 0 0
762 1 8 -4.3600000000000000e-01 1.8273810508931186e+02 1.5061218239308980e+02 1.5815758345023417e+02 0 0 0
688 1 18 -6.2000000000000000e-02 1.9057250689360609e+02 1.4533134997361080e+02 1.5591889985960921e+02 0 0 0
629 1 5 -7.0000000000000001e-03 1.9281147443409716e+02 1.4855567946187210e+02 1.5265711133983535e+02 0 0 0
630 1 6 -1.2100000000000000e-01 1.9169295701109019e+02 1.4935951240770200e+02 1.5225847009171210e+02 0 0 0
662 1 10 5.9999999999999998e-02 1.9095342129479502e+02 1.5223381772159388e+02 1.5267248513033934e+02 0 0 0
625 1 1 -6.2000000000000000e-02 1.9230208566595496e+02 1.4761035529675738e+02 1.5406306946728594e+02 0 0 0
627 1 3 -4.9000000000000002e-02 1.9049910385578340e+02 1.4907278857072859e+02 1.5298879057612871e+02 0 0 0
632 1 7 1.3700000000000001e-01 1.8958714842336926e+02 1.4962914864085147e+02 1.5283004309846947e+02 0 0 0
686 1 16 -8.6999999999999994e-02 1.8961264783597863e+02 1.4786882260959587e+02 1.5497318286258295e+02 0 0 0
626 1 2 -5.2999999999999999e-02 1.9059668582966711e+02 1.4817807976886084e+02 1.5401158253697361e+02 0 0 0
685 1 15 -6.0000000000000001e-03 1.8835458104612798e+02 1.4902744560378906e+02 1.5545917637221501e+02 0 0 0
687 1 17 7.6999999999999999e-02 1.8968644557979320e+02 1.4684505253115154e+02 1.5591043728012679e+02 0 0 0
692 1 22 -6.0999999999999999e-02 1.8790410013590579e+02 1.4806092907676572e+02 1.5683943992222382e+02 0 0 0
672 1 13 -1.2000000000000000e-01 1.8844187316061584e+02 1.5280060131130287e+02 1.5156423413358698e+02 0 0 0
647 1 12 5.9999999999999998e-02 1.9841996145291037e+02 1.4805680118867747e+02 1.5214291948878613e+02 0 0 0
635 1 10 5.9999999999999998e-02 1.9621416445443967e+02 1.4901955986071030e+02 1.5280510637551754e+02 0 0 0
639 1 13 -1.2000000000000000e-01 1.9777172691241668e+02 1.4757510225827806e+02 1.5491828959596779e+02 0 0 0
641 1 12 5.9999999999999998e-02 1.9812801214105286e+02 1.4859441239942223e+02 1.5476940147565898e+02 0 0 0
634 1 9 1.6900000000000001e-01 1.9587389200456016e+02 1.4807187779990835e+02 1.5322249518661314e+02 0 0 0
640 1 12 5.9999999999999998e-02 1.9705579949049692e+02 1.4777007523278434e+02 1.5571674653560609e+02 0 0 0
636 1 10 5.9999999999999998e-02 1.9520351457340874e+02 1.4827894502266017e+02 1.5405665198159568e+02 0 0 0
611 1 12 5.9999999999999998e-02 2.0121836234604274e+02 1.4454126653866655e+02 1.5022435178331722e+02 0 0 0
609 1 13 -1.2000000000000000e-01 2.0201468856808219e+02 1.4479203299745811e+02 1.5092512330995089e+02 0 0 0
612 1 13 -1.2000000000000000e-01 2.0249122101613128e+02 1.4351599940590413e+02 1.5152325451364908e+02 0 0 0
615 1 14 -1.7999999999999999e-01 2.0141842101974342e+02 1.4294702393084259e+02 1.5254040944108712e+02 0 0 0
618 1 12 5.9999999999999998e-02 2.0167976510850207e+02 1.4327046685523820e+02 1.5354797284684469e+02 0 0 0
617 1 12 5.9999999999999998e-02 2.0037457334271613e+02 1.4318017518320931e+02 1.5233035567957532e+02 0 0 0
610 1 12 5.9999999999999998e-02 2.0140577388249002e+02 1.4539183378839681e+02 1.5160155666162964e+02 0 0 0
875 1 12 5.9999999999999998e-02 1.7933528076707950e+02 1.6102248912748055e+02 1.5898425462851827e+02 0 0 0
674 1 12 5.9999999999999998e-02 1.8816046464601737e+02 1.5239835357747597e+02 1.5253742816251486e+02 0 0 0
667 1 12 5.9999999999999998e-02 1.8922936942827943e+02 1.5535601331005452e+02 1.5206302830063439e+02 0 0 0
666 1 12 5.9999999999999998e-02 1.9012884870817757e+02 1.5444096279857698e+02 1.5317859507358355e+02 0 0 0
696 1 26 7.1099999999999997e-01 1.9040944432224387e+02 1.4387278876262602e+02 1.5827877083333814e+02 0 0 0
706 1 12 5.9999999999999998e-02 1.9549598398654260e+02 1.4204286401860227e+02 1.5685040096149089e+02 0 0 0
703 1 12 5.9999999999999998e-02 1.9524469373524673e+02 1.4492990845511088e+02 1.5780166301123776e+02 0 0 0
708 1 12 5.9999999999999998e-02 1.9606748602339101e+02 1.4344174840271864e+02 1.5591650976729417e+02 0 0 0
714 1 12 5.9999999999999998e-02 1.9530162826806048e+02 1.4586205097280126e+02 1.5986352620702917e+02 0 0 0
704 1 12 5.9999999999999998e-02 1.9387044885588139e+02 1.4443363100668552e+02 1.5682454974021454e+02 0 0 0
702 1 13 -1.2000000000000000e-01 1.9465285920021225e+02 1.4406919040203448e+02 1.5749022064651882e+02 0 0 0
711 1 12 5.9999999999999998e-02 1.9313175853575723e+02 1.4572001607431346e+02 1.5870421824465944e+02 0 0 0
715 1 13 -1.2000000000000000e-01 1.9408242634965097e+02 1.4674075679460398e+02 1.6130040025131848e+02 0 0 0
717 1 12 5.9999999999999998e-02 1.9339957441495741e+02 1.4737863165831192e+02 1.6073921499275031e+02 0 0 0
713 1 12 5.9999999999999998e-02 1.9491156145670504e+02 1.4481885801450264e+02 1.6113270218026901e+02 0 0 0
701 1 12 5.9999999999999998e-02 1.9440480467011895e+02 1.4303574916579805e+02 1.5935306524610687e+02 0 0 0
705 1 14 -1.7999999999999999e-01 1.9571388812730697e+02 1.4311002153950554e+02 1.5689274020252100e+02 0 0 0
707 1 12 5.9999999999999998e-02 1.9650398927477875e+02 1.4316288044001936e+02 1.5764177031834708e+02 0 0 0
695 1 25 -2.8899999999999998e-01 1.9155527800699193e+02 1.4348197713571221e+02 1.5768303850369358e+02 0 0 0
699 1 28 2.9999999999999999e-02 1.9295823617254808e+02 1.4203783189230759e+02 1.5778942906585200e+02 0 0 0
697 1 27 1.9000000000000000e-01 1.9255599438636358e+02 1.4284805452728125e+02 1.5839757446737769e+02 0 0 0
712 1 13 -1.2000000000000000e-01 1.9444361665536604e+02 1.4552135319509603e+02 1.6044304416067442e+02 0 0 0
700 1 29 -5.9999999999999998e-02 1.9381428895560916e+02 1.4367405686853118e+02 1.5869583281572278e+02 0 0 0
709 1 13 -1.2000000000000000e-01 1.9339373888515553e+02 1.4496970629405357e+02 1.5945020859762823e+02 0 0 0
710 1 12 5.9999999999999998e-02 1.9249979190090838e+02 1.4482757152707850e+02 1.6005746184154964e+02 0 0 0
698 1 28 2.9999999999999999e-02 1.9217343627024937e+02 1.4257964271622464e+02 1.5938231018117293e+02 0 0 0
716 1 12 5.9999999999999998e-02 1.9350775438591117e+02 1.4639409425204559e+02 1.6215928168018306e+02 0 0 0
721 1 12 5.9999999999999998e-02 1.9600290536943982e+02 1.4684810030530110e+02 1.6229593268541751e+02 0 0 0
718 1 14 -1.7999999999999999e-01 1.9531046922457438e+02 1.4754720075515098e+02 1.6182700758774897e+02 0 0 0
719 1 12 5.9999999999999998e-02 1.9501596486712270e+02 1.4841076239232211e+02 1.6242335361039920e+02 0 0 0
789 1 16 -8.6999999999999994e-02 1.8169134524791488e+02 1.5201237840451986e+02 1.6331802735073268e+02 0 0 0
790 1 17 7.6999999999999999e-02 1.8120727250727552e+02 1.5138544569610124e+02 1.6443229394766905e+02 0 0 0
732 1 5 -7.0000000000000001e-03 1.8477611514898322e+02 1.5057110443382859e+02 1.6132844715036566e+02 0 0 0
725 1 4 2.3200000000000001e-01 1.8586832690909509e+02 1.4983129520092365e+02 1.6096237379706119e+02 0 0 0
727 1 6 -1.2100000000000000e-01 1.8602568702572216e+02 1.4957140174434502e+02 1.5957143361579753e+02 0 0 0
736 1 8 -4.3600000000000000e-01 1.8686577022271086e+02 1.4937321122593863e+02 1.6180781395998997e+02 0 0 0
728 1 1 -6.2000000000000000e-02 1.8426662367546515e+02 1.5095764867720982e+02 1.6292949985127760e+02 0 0 0
726 1 5 -7.0000000000000001e-03 1.8495554623708063e+02 1.4987494010095460e+02 1.5864888344230414e+02 0 0 0
733 1 6 -1.2100000000000000e-01 1.8371607452599923e+02 1.5080058621861781e+02 1.6042152129001497e+02 0 0 0
731 1 4 2.3200000000000001e-01 1.8376821824994192e+02 1.5047104822696244e+02 1.5906115086757526e+02 0 0 0
729 1 2 -5.2999999999999999e-02 1.8270405469249098e+02 1.5152194420913943e+02 1.6237365373214254e+02 0 0 0
730 1 3 -4.9000000000000002e-02 1.8257833233598222e+02 1.5148980072901048e+02 1.6102455352535534e+02 0 0 0
735 1 7 1.3700000000000001e-01 1.8171052320000479e+02 1.5183913757222533e+02 1.6048485817287701e+02 0 0 0
739 1 10 5.9999999999999998e-02 1.8682786399787432e+02 1.5119124847446477e+02 1.6290696714976261e+02 0 0 0
737 1 9 1.6900000000000001e-01 1.8754265189988274e+02 1.5051862389773223e+02 1.6243288464615679e+02 0 0 0
723 1 2 -5.2999999999999999e-02 1.8690256813750662e+02 1.4854447247729829e+02 1.5769769323458019e+02 0 0 0
724 1 3 -4.9000000000000002e-02 1.8708227617785280e+02 1.4882150363275591e+02 1.5899785964869002e+02 0 0 0
744 1 12 5.9999999999999998e-02 1.8949643131002000e+02 1.4809707114899427e+02 1.6278435117978972e+02 0 0 0
689 1 19 -3.7100000000000000e-01 1.8983639977509330e+02 1.4495780355274533e+02 1.5748874682928775e+02 0 0 0
690 1 20 4.0799999999999997e-01 1.8882809460319979e+02 1.4583824587379314e+02 1.5783476251166894e+02 0 0 0
694 1 24 -4.9900000000000000e-01 1.8999673389737322e+02 1.4353918235200933e+02 1.5931645500748593e+02 0 0 0
693 1 23 -1.8300000000000000e-01 1.8810808293396326e+02 1.4579299402246542e+02 1.5891726938006846e+02 0 0 0
691 1 21 -6.8000000000000005e-02 1.8871333718913226e+02 1.4695314053213622e+02 1.5695199490943014e+02 0 0 0
743 1 12 5.9999999999999998e-02 1.8972004486738280e+02 1.4942420253434562e+02 1.6168186115048320e+02 0 0 0
738 1 10 5.9999999999999998e-02 1.8804657854735657e+02 1.5114507440114744e+02 1.6169686989033252e+02 0 0 0
734 1 7 1.3700000000000001e-01 1.8794622617544746e+02 1.4869289758843851e+02 1.5963303748758341e+02 0 0 0
870 1 12 5.9999999999999998e-02 1.7761263284493566e+02 1.5879504632692897e+02 1.6153075162060537e+02 0 0 0
788 1 15 -6.0000000000000001e-03 1.8112194671846294e+02 1.5362037066576053e+02 1.6317285726263586e+02 0 0 0
825 1 1 -6.2000000000000000e-02 1.7888967250517859e+02 1.5578222727412054e+02 1.6396584182016190e+02 0 0 0
867 1 10 5.9999999999999998e-02 1.7933913168008732e+02 1.5896212155072806e+02 1.6322503708388223e+02 0 0 0
865 1 8 -4.3600000000000000e-01 1.7736555416055126e+02 1.5859925440391297e+02 1.6378080925377949e+02 0 0 0
866 1 9 1.6900000000000001e-01 1.7835943696220252e+02 1.5942875660360724e+02 1.6332775026104156e+02 0 0 0
874 1 14 -1.7999999999999999e-01 1.7855712254398981e+02 1.6046572604053765e+02 1.5950635148600156e+02 0 0 0
876 1 12 5.9999999999999998e-02 1.7849301111123211e+02 1.5951475729607580e+02 1.5897753370075412e+02 0 0 0
872 1 12 5.9999999999999998e-02 1.7983132051892574e+02 1.5974369221967311e+02 1.6115298151491342e+02 0 0 0
834 1 4 2.3200000000000001e-01 1.7765807016100550e+02 1.5807274828028261e+02 1.6501112416616053e+02 0 0 0
795 1 22 -6.0999999999999999e-02 1.8022377567781285e+02 1.5342513676613652e+02 1.6461167163812684e+02 0 0 0
882 1 12 5.9999999999999998e-02 1.7499024123364299e+02 1.5936003846609958e+02 1.6281541177980839e+02 0 0 0
838 1 7 1.3700000000000001e-01 1.7646846575903416e+02 1.6061657010789042e+02 1.6541986480879407e+02 0 0 0
877 1 12 5.9999999999999998e-02 1.7759291173709443e+02 1.6096999082809745e+02 1.5944220676308908e+02 0 0 0
889 1 12 5.9999999999999998e-02 1.7413675269593836e+02 1.6280021685267212e+02 1.6189312292762889e+02 0 0 0
888 1 12 5.9999999999999998e-02 1.7267198331670522e+02 1.6218152622111040e+02 1.6251303464247690e+02 0 0 0
890 1 12 5.9999999999999998e-02 1.7423891675082263e+02 1.6190536108235816e+02 1.6342556330392199e+02 0 0 0
887 1 14 -1.7999999999999999e-01 1.7373757795748296e+02 1.6195857744659008e+02 1.6245916409109793e+02 0 0 0
884 1 13 -1.2000000000000000e-01 1.7396810550675056e+02 1.6075778186857175e+02 1.6152014751950423e+02 0 0 0
886 1 12 5.9999999999999998e-02 1.7303175621822291e+02 1.6020215189528480e+02 1.6157138564754007e+02 0 0 0
883 1 12 5.9999999999999998e-02 1.7538732023818781e+02 1.5909593095161361e+02 1.6118397396229344e+02 0 0 0
885 1 12 5.9999999999999998e-02 1.7399742155581032e+02 1.6112308162451563e+02 1.6049360149907935e+02 0 0 0
881 1 13 -1.2000000000000000e-01 1.7518490484583035e+02 1.5990158235767785e+02 1.6188970324498379e+02 0 0 0
879 1 12 5.9999999999999998e-02 1.7667471887751677e+02 1.6115702280745069e+02 1.6294760526837695e+02 0 0 0
869 1 11 1.0000000000000001e-01 1.7781418432866141e+02 1.5978779840050424e+02 1.6193314486088155e+02 0 0 0
878 1 13 -1.2000000000000000e-01 1.7654320199809024e+02 1.6061330756285750e+02 1.6201209630175947e+02 0 0 0
873 1 12 5.9999999999999998e-02 1.7916161274950048e+02 1.6125566187923945e+02 1.6148952725510520e+02 0 0 0
871 1 13 -1.2000000000000000e-01 1.7890939015944750e+02 1.6030817762022738e+02 1.6101333680052267e+02 0 0 0
868 1 10 5.9999999999999998e-02 1.7848662102502885e+02 1.6033039333486070e+02 1.6392689583532558e+02 0 0 0
880 1 12 5.9999999999999998e-02 1.7663622053837707e+02 1.6140461358808031e+02 1.6126826693222725e+02 0 0 0
1069 1 12 5.9999999999999998e-02 1.5435770334944505e+02 1.6799619093997265e+02 1.6380921687952295e+02 0 0 0
1066 1 12 5.9999999999999998e-02 1.5713282459089382e+02 1.6765413820713400e+02 1.6269380706277659e+02 0 0 0
1065 1 12 5.9999999999999998e-02 1.5606457903461904e+02 1.6650725548357377e+02 1.6340868853404720e+02 0 0 0
947 1 12 5.9999999999999998e-02 1.7073193490896620e+02 1.6889101791881737e+02 1.6364997814703185e+02 0 0 0
949 1 12 5.9999999999999998e-02 1.7246846093482793e+02 1.6696481405536451e+02 1.6421725668458436e+02 0 0 0
946 1 11 1.0000000000000001e-01 1.7173239837676030e+02 1.6896870870245314e+02 1.6407558006402414e+02 0 0 0
959 1 12 5.9999999999999998e-02 1.7140248341048846e+02 1.7163679498701737e+02 1.6500877748027776e+02 0 0 0
943 1 9 1.6900000000000001e-01 1.7182778588217590e+02 1.6885406498079351e+02 1.6570143772296629e+02 0 0 0
952 1 12 5.9999999999999998e-02 1.7248737774901056e+02 1.6808860694241258e+02 1.6133412219926578e+02 0 0 0
953 1 12 5.9999999999999998e-02 1.7136511219269045e+02 1.6709148420158976e+02 1.6194144284009764e+02 0 0 0
951 1 14 -1.7999999999999999e-01 1.7241983348102093e+02 1.6731613709956909e+02 1.6210016926627017e+02 0 0 0
954 1 12 5.9999999999999998e-02 1.7295127208045281e+02 1.6642522241000978e+02 1.6176558877561931e+02 0 0 0
948 1 13 -1.2000000000000000e-01 1.7268909693579189e+02 1.6779777722198779e+02 1.6354972982271951e+02 0 0 0
963 1 12 5.9999999999999998e-02 1.7130212270222319e+02 1.7288643010184248e+02 1.6227266181931964e+02 0 0 0
958 1 13 -1.2000000000000000e-01 1.7128371083041353e+02 1.7147111347508900e+02 1.6393801011391909e+02 0 0 0
957 1 12 5.9999999999999998e-02 1.7252435601989805e+02 1.7041448446487104e+02 1.6254595140458977e+02 0 0 0
956 1 12 5.9999999999999998e-02 1.7320848699060647e+02 1.7062026322457965e+02 1.6416455608454157e+02 0 0 0
955 1 13 -1.2000000000000000e-01 1.7230926191399053e+02 1.7034711565172410e+02 1.6361239243896006e+02 0 0 0
960 1 12 5.9999999999999998e-02 1.7028044542252155e+02 1.7108260290355835e+02 1.6376302906516298e+02 0 0 0
961 1 13 -1.2000000000000000e-01 1.7162592771773879e+02 1.7285634057799902e+02 1.6331301992445105e+02 0 0 0
950 1 12 5.9999999999999998e-02 1.7374226224150473e+02 1.6795068627834519e+02 1.6378544583615357e+02 0 0 0
966 1 12 5.9999999999999998e-02 1.7348118466433777e+02 1.7292278461602754e+02 1.6437374727426985e+02 0 0 0
962 1 12 5.9999999999999998e-02 1.7106092918835239e+02 1.7366018743595930e+02 1.6378493860971651e+02 0 0 0
965 1 12 5.9999999999999998e-02 1.7331071777208538e+02 1.7420415640501346e+02 1.6310331175448206e+02 0 0 0
964 1 14 -1.7999999999999999e-01 1.7317149259966695e+02 1.7315261209813247e+02 1.6335425222818938e+02 0 0 0
967 1 12 5.9999999999999998e-02 1.7378413766645332e+02 1.7240803912008801e+02 1.6284594413629071e+02 0 0 0
820 1 12 5.9999999999999998e-02 1.8595125828858590e+02 1.4537407535300014e+02 1.6989106121378140e+02 0 0 0
814 1 12 5.9999999999999998e-02 1.8352251923833410e+02 1.4575786019416313e+02 1.6840703811739508e+02 0 0 0
819 1 12 5.9999999999999998e-02 1.8615118310602378e+02 1.4668019702583331e+02 1.6873985693607946e+02 0 0 0
823 1 12 5.9999999999999998e-02 1.8674315713464009e+02 1.4814754018264966e+02 1.7090622759081865e+02 0 0 0
821 1 14 -1.7999999999999999e-01 1.8684877056008608e+02 1.4706498251596921e+02 1.7083541246908300e+02 0 0 0
818 1 13 -1.2000000000000000e-01 1.8592594117732440e+02 1.4645841152645235e+02 1.6978301439139889e+02 0 0 0
817 1 12 5.9999999999999998e-02 1.8425191843882953e+02 1.4633834732860819e+02 1.7100107351892990e+02 0 0 0
822 1 12 5.9999999999999998e-02 1.8660616528603893e+02 1.4670339461565882e+02 1.7183466062198724e+02 0 0 0
815 1 13 -1.2000000000000000e-01 1.8444446540840627e+02 1.4687462121300146e+02 1.7007186090510012e+02 0 0 0
824 1 12 5.9999999999999998e-02 1.8786154221753597e+02 1.4679684566555559e+02 1.7053458660422169e+02 0 0 0
806 1 12 5.9999999999999998e-02 1.8207880503649818e+02 1.4586029721621830e+02 1.7125033741361082e+02 0 0 0
800 1 27 1.9000000000000000e-01 1.8096487862818449e+02 1.4702512126675055e+02 1.6828407170152329e+02 0 0 0
797 1 24 -4.9900000000000000e-01 1.7992676436135224e+02 1.4948458736271206e+02 1.6872640560095931e+02 0 0 0
792 1 19 -3.7100000000000000e-01 1.8061574835681949e+02 1.5023332992312029e+02 1.6655577889959451e+02 0 0 0
799 1 26 7.1099999999999997e-01 1.8044335200635865e+02 1.4928393964054692e+02 1.6763835061859160e+02 0 0 0
796 1 23 -1.8300000000000000e-01 1.7948720116781124e+02 1.5209371827888154e+02 1.6741440492839570e+02 0 0 0
793 1 20 4.0799999999999997e-01 1.8009737430221207e+02 1.5152435866462292e+02 1.6647370205740515e+02 0 0 0
794 1 21 -6.8000000000000005e-02 1.8046058527092947e+02 1.5222061172650302e+02 1.6529317397638448e+02 0 0 0
791 1 18 -6.2000000000000000e-02 1.8156897234231849e+02 1.4973905089836165e+02 1.6512511906671355e+02 0 0 0
798 1 25 -2.8899999999999998e-01 1.8109056436296311e+02 1.4809981259042598e+02 1.6733571612744572e+02 0 0 0
802 1 28 2.9999999999999999e-02 1.8093525717346287e+02 1.4611065524726021e+02 1.6769164072260236e+02 0 0 0
801 1 28 2.9999999999999999e-02 1.7993301874544287e+02 1.4708526862785723e+02 1.6863011526550122e+02 0 0 0
813 1 12 5.9999999999999998e-02 1.8361358244920444e+02 1.4727069984211511e+02 1.6800412947340723e+02 0 0 0
816 1 12 5.9999999999999998e-02 1.8445831531575689e+02 1.4792098373927033e+02 1.7037687507587509e+02 0 0 0
812 1 13 -1.2000000000000000e-01 1.8339822171322999e+02 1.4671369950246176e+02 1.6891597955357017e+02 0 0 0
804 1 12 5.9999999999999998e-02 1.8189071085328530e+02 1.4787741537176726e+02 1.7002753328543665e+02 0 0 0
803 1 29 -5.9999999999999998e-02 1.8195540852609037e+02 1.4695083773305058e+02 1.6945712282746453e+02 0 0 0
752 1 13 -1.2000000000000000e-01 1.8684937908869847e+02 1.5002991861987445e+02 1.6540724490138001e+02 0 0 0
753 1 12 5.9999999999999998e-02 1.8613425888343914e+02 1.5053032898760424e+02 1.6475433448783517e+02 0 0 0
759 1 12 5.9999999999999998e-02 1.8409173020591399e+02 1.4970623984919288e+02 1.6696708941525031e+02 0 0 0
757 1 12 5.9999999999999998e-02 1.8575260809140096e+02 1.4846557909182496e+02 1.6605647672369940e+02 0 0 0
755 1 13 -1.2000000000000000e-01 1.8614502128454643e+02 1.4934221231952827e+02 1.6657186601742913e+02 0 0 0
756 1 12 5.9999999999999998e-02 1.8689580110418802e+02 1.4904187763438989e+02 1.6730277555067758e+02 0 0 0
758 1 14 -1.7999999999999999e-01 1.8504655193446831e+02 1.5010741395833162e+02 1.6730690525056684e+02 0 0 0
760 1 12 5.9999999999999998e-02 1.8522175839177768e+02 1.4985899474716697e+02 1.6835365765342340e+02 0 0 0
750 1 12 5.9999999999999998e-02 1.8722896662809836e+02 1.4838709288583993e+02 1.6409623562569141e+02 0 0 0
749 1 13 -1.2000000000000000e-01 1.8774161988226049e+02 1.4923746556812500e+02 1.6454584987022503e+02 0 0 0
751 1 12 5.9999999999999998e-02 1.8851627677284708e+02 1.4882725440363481e+02 1.6519371830391989e+02 0 0 0
754 1 12 5.9999999999999998e-02 1.8739231973725754e+02 1.5093037875800448e+02 1.6569445037288415e+02 0 0 0
805 1 13 -1.2000000000000000e-01 1.8143288014228733e+02 1.4588889145980042e+02 1.7037280485126487e+02 0 0 0
747 1 12 5.9999999999999998e-02 1.9102214889881427e+02 1.4916805020538422e+02 1.6433518645493126e+02 0 0 0
742 1 13 -1.2000000000000000e-01 1.8960603174425245e+02 1.4918056237999284e+02 1.6273814733094179e+02 0 0 0
740 1 11 1.0000000000000001e-01 1.8846834999902794e+02 1.5002642054868033e+02 1.6344165264744962e+02 0 0 0
745 1 14 -1.7999999999999999e-01 1.9100233055745485e+02 1.4953892044924896e+02 1.6331041209539578e+02 0 0 0
748 1 12 5.9999999999999998e-02 1.9106665102675410e+02 1.5062430594582713e+02 1.6338723383584050e+02 0 0 0
746 1 12 5.9999999999999998e-02 1.9180804375438166e+02 1.4899205678742064e+02 1.6282065049749173e+02 0 0 0
741 1 12 5.9999999999999998e-02 1.8893031360652461e+02 1.5095159358828977e+02 1.6378624584547961e+02 0 0 0
860 1 12 5.9999999999999998e-02 1.8093431219172049e+02 1.5283675458543217e+02 1.6963831377075019e+02 0 0 0
826 1 2 -5.2999999999999999e-02 1.7941893768296777e+02 1.5455491902393115e+02 1.6512579800687851e+02 0 0 0
827 1 3 -4.9000000000000002e-02 1.7913920802526113e+02 1.5494441787637851e+02 1.6643557381377343e+02 0 0 0
830 1 6 -1.2100000000000000e-01 1.7855068616101161e+02 1.5626408963648666e+02 1.6646199334322429e+02 0 0 0
829 1 5 -7.0000000000000001e-03 1.7827868786524635e+02 1.5681497473319681e+02 1.6517992764209890e+02 0 0 0
837 1 7 1.3700000000000001e-01 1.7955045529344338e+02 1.5445571698089589e+02 1.6730646250882413e+02 0 0 0
828 1 4 2.3200000000000001e-01 1.7824188397541138e+02 1.5696962543345882e+02 1.6760735926380156e+02 0 0 0
839 1 8 -4.3600000000000000e-01 1.7849901828292781e+02 1.5636099400652321e+02 1.6882977364294078e+02 0 0 0
835 1 5 -7.0000000000000001e-03 1.7759720939191729e+02 1.5825670800145167e+02 1.6751230175709958e+02 0 0 0
853 1 12 5.9999999999999998e-02 1.8058130053577264e+02 1.5516444125701088e+02 1.6925954142781490e+02 0 0 0
854 1 12 5.9999999999999998e-02 1.8175791054557519e+02 1.5605966073104440e+02 1.7022719276608814e+02 0 0 0
840 1 9 1.6900000000000001e-01 1.7902020930602740e+02 1.5715466846619677e+02 1.6985304099488829e+02 0 0 0
841 1 10 5.9999999999999998e-02 1.7966006623828636e+02 1.5793676488746587e+02 1.6944437445633378e+02 0 0 0
836 1 6 -1.2100000000000000e-01 1.7725965165622168e+02 1.5880147240449153e+02 1.6623011389630869e+02 0 0 0
842 1 10 5.9999999999999998e-02 1.7827027290883512e+02 1.5765327856002199e+02 1.7046711214658362e+02 0 0 0
843 1 11 1.0000000000000001e-01 1.7967054969728562e+02 1.5627133758843763e+02 1.7089619166572510e+02 0 0 0
852 1 13 -1.2000000000000000e-01 1.8084330012786691e+02 1.5546848123131781e+02 1.7027295937144518e+02 0 0 0
858 1 13 -1.2000000000000000e-01 1.8165534725512856e+02 1.5297233570480964e+02 1.7044443174929279e+02 0 0 0
761 1 12 5.9999999999999998e-02 1.8516050060591999e+02 1.5118556239177684e+02 1.6719415922044243e+02 0 0 0
859 1 12 5.9999999999999998e-02 1.8258558325828801e+02 1.5327268066238071e+02 1.6996219333601965e+02 0 0 0
1116 1 12 5.9999999999999998e-02 1.4951156100880928e+02 1.6679728765316753e+02 1.6463662848945282e+02 0 0 0
1120 1 12 5.9999999999999998e-02 1.5178484715523436e+02 1.6587702721599896e+02 1.6277958993345612e+02 0 0 0
1119 1 12 5.9999999999999998e-02 1.5024222404329510e+02 1.6510723134658903e+02 1.6292695038079782e+02 0 0 0
1117 1 14 -1.7999999999999999e-01 1.5074191953783620e+02 1.6607038082275926e+02 1.6303062053096579e+02 0 0 0
1118 1 12 5.9999999999999998e-02 1.5036883299193445e+02 1.6681056521058534e+02 1.6232278331163712e+02 0 0 0
1056 1 12 5.9999999999999998e-02 1.6035173237635195e+02 1.6500610992786358e+02 1.6517429343432960e+02 0 0 0
1057 1 12 5.9999999999999998e-02 1.6018395018805327e+02 1.6460041176683515e+02 1.6683551738212594e+02 0 0 0
1055 1 12 5.9999999999999998e-02 1.6173012942973665e+02 1.6508280290782514e+02 1.6604891313336586e+02 0 0 0
1054 1 14 -1.7999999999999999e-01 1.6067159942676923e+02 1.6531284621285403e+02 1.6617013374395981e+02 0 0 0
833 1 3 -4.9000000000000002e-02 1.7669014391175520e+02 1.6007637446164139e+02 1.6632840620046522e+02 0 0 0
891 1 15 -6.0000000000000001e-03 1.7428744701116150e+02 1.6242080713748399e+02 1.6748383162645086e+02 0 0 0
898 1 22 -6.0999999999999999e-02 1.7439672331814393e+02 1.6391844402685211e+02 1.6830596433878384e+02 0 0 0
897 1 21 -6.8000000000000005e-02 1.7545825345782151e+02 1.6384119906258789e+02 1.6926831561595148e+02 0 0 0
892 1 16 -8.6999999999999994e-02 1.7591516240887469e+02 1.6189086459746125e+02 1.6795649930535876e+02 0 0 0
893 1 17 7.6999999999999999e-02 1.7631633420099726e+02 1.6271713429528924e+02 1.6898674860128187e+02 0 0 0
929 1 2 -5.2999999999999999e-02 1.7330681876530241e+02 1.6484454443014911e+02 1.6841558998296833e+02 0 0 0
896 1 20 4.0799999999999997e-01 1.7588641035727184e+02 1.6463197139885952e+02 1.7045947061549003e+02 0 0 0
928 1 1 -6.2000000000000000e-02 1.7241387617711072e+02 1.6486530960501722e+02 1.6991083319296433e+02 0 0 0
832 1 2 -5.2999999999999999e-02 1.7655247223564467e+02 1.6064166376842567e+02 1.6757203131152923e+02 0 0 0
831 1 1 -6.2000000000000000e-02 1.7718873039376163e+02 1.5945223587070001e+02 1.6877273439958742e+02 0 0 0
895 1 19 -3.7100000000000000e-01 1.7717999363337327e+02 1.6426478093084759e+02 1.7084523777285241e+02 0 0 0
894 1 18 -6.2000000000000000e-02 1.7768759138208264e+02 1.6271034672035017e+02 1.7009274666537775e+02 0 0 0
916 1 12 5.9999999999999998e-02 1.8019902357074304e+02 1.6233660775018302e+02 1.7324847856758021e+02 0 0 0
901 1 25 -2.8899999999999998e-01 1.7905137192939216e+02 1.6433864085398648e+02 1.7208451756989353e+02 0 0 0
917 1 12 5.9999999999999998e-02 1.8015244110413053e+02 1.6286066144009106e+02 1.7501882469095048e+02 0 0 0
915 1 13 -1.2000000000000000e-01 1.8072872959610626e+02 1.6276692094655110e+02 1.7409838712423581e+02 0 0 0
922 1 12 5.9999999999999998e-02 1.8077382589421433e+02 1.5986239532195322e+02 1.7432758920875824e+02 0 0 0
927 1 12 5.9999999999999998e-02 1.8217221798002527e+02 1.5870975300884714e+02 1.7583973295502031e+02 0 0 0
924 1 14 -1.7999999999999999e-01 1.8267660274392426e+02 1.5955267016254197e+02 1.7536730651035566e+02 0 0 0
923 1 12 5.9999999999999998e-02 1.8083399410508977e+02 1.6050487504288679e+02 1.7577971727674236e+02 0 0 0
921 1 13 -1.2000000000000000e-01 1.8149051112189366e+02 1.6043930719322873e+02 1.7491208469833720e+02 0 0 0
925 1 12 5.9999999999999998e-02 1.8323414197971118e+02 1.6013766701079842e+02 1.7609876440317655e+02 0 0 0
1172 1 12 5.9999999999999998e-02 1.4255895943774522e+02 1.6818594795446884e+02 1.7213421714301828e+02 0 0 0
1111 1 28 2.9999999999999999e-02 1.4963204334887675e+02 1.6656941830109270e+02 1.6690491756899095e+02 0 0 0
1109 1 27 1.9000000000000000e-01 1.5070998004927421e+02 1.6645449487756102e+02 1.6701869389662528e+02 0 0 0
1106 1 24 -4.9900000000000000e-01 1.4936792791876550e+02 1.6876216768733661e+02 1.6774500289996249e+02 0 0 0
1108 1 26 7.1099999999999997e-01 1.5059415123579444e+02 1.6875658063733570e+02 1.6764920607575726e+02 0 0 0
1101 1 19 -3.7100000000000000e-01 1.5147014878449303e+02 1.6991877304589616e+02 1.6791447676401748e+02 0 0 0
1107 1 25 -2.8899999999999998e-01 1.5133966596255374e+02 1.6771159760267267e+02 1.6741006394330753e+02 0 0 0
1070 1 12 5.9999999999999998e-02 1.5537873610223548e+02 1.6951053773651566e+02 1.6344826675230206e+02 0 0 0
1063 1 12 5.9999999999999998e-02 1.5640181609199092e+02 1.6752494970567491e+02 1.6564151974862554e+02 0 0 0
1061 1 13 -1.2000000000000000e-01 1.5706563334371359e+02 1.6779900618567152e+02 1.6482155650713540e+02 0 0 0
1064 1 13 -1.2000000000000000e-01 1.5639778341855700e+02 1.6754182415122349e+02 1.6349080143471636e+02 0 0 0
1060 1 12 5.9999999999999998e-02 1.5820556761815581e+02 1.6606970755262779e+02 1.6474041855576436e+02 0 0 0
1058 1 13 -1.2000000000000000e-01 1.5841349218775272e+02 1.6708348959650669e+02 1.6508263681863431e+02 0 0 0
1059 1 12 5.9999999999999998e-02 1.5912100850467797e+02 1.6742227901731093e+02 1.6432583936243137e+02 0 0 0
1049 1 11 1.0000000000000001e-01 1.5894865923972552e+02 1.6708115733410986e+02 1.6651391078660188e+02 0 0 0
1050 1 12 5.9999999999999998e-02 1.5831950392029432e+02 1.6631650691797353e+02 1.6696951294324063e+02 0 0 0
1067 1 14 -1.7999999999999999e-01 1.5519749857347168e+02 1.6844867068794304e+02 1.6328185925499804e+02 0 0 0
1068 1 12 5.9999999999999998e-02 1.5496108514317004e+02 1.6843021027143132e+02 1.6221796644752118e+02 0 0 0
1062 1 12 5.9999999999999998e-02 1.5720143417280002e+02 1.6887439992192373e+02 1.6493638893433450e+02 0 0 0
1037 1 1 -6.2000000000000000e-02 1.5642886801635268e+02 1.7097896316198319e+02 1.6702987329297540e+02 0 0 0
1100 1 18 -6.2000000000000000e-02 1.5317756919811532e+02 1.6998056624653327e+02 1.6740055750564059e+02 0 0 0
1048 1 10 5.9999999999999998e-02 1.5759975052024907e+02 1.6856272035108066e+02 1.6738403601822489e+02 0 0 0
1047 1 10 5.9999999999999998e-02 1.5914790693589867e+02 1.6835872393782836e+02 1.6829719790854224e+02 0 0 0
1046 1 9 1.6900000000000001e-01 1.5867591642803222e+02 1.6840366254615680e+02 1.6731571651062464e+02 0 0 0
1045 1 8 -4.3600000000000000e-01 1.5922935417216408e+02 1.6952903758240848e+02 1.6658038717804195e+02 0 0 0
1114 1 13 -1.2000000000000000e-01 1.5056886533804916e+02 1.6664870168525295e+02 1.6441724351779243e+02 0 0 0
1115 1 12 5.9999999999999998e-02 1.5108254225686576e+02 1.6758652017197096e+02 1.6462874418724067e+02 0 0 0
1052 1 12 5.9999999999999998e-02 1.6079293378302270e+02 1.6673339325460034e+02 1.6769698097689860e+02 0 0 0
1051 1 13 -1.2000000000000000e-01 1.6039577974123691e+02 1.6669586925292333e+02 1.6668260395835213e+02 0 0 0
1053 1 12 5.9999999999999998e-02 1.6095357941385058e+02 1.6742934535660874e+02 1.6610039070021372e+02 0 0 0
1034 1 4 2.3200000000000001e-01 1.5927147072480415e+02 1.7074203741803939e+02 1.6727661219669292e+02 0 0 0
1043 1 7 1.3700000000000001e-01 1.6182151107138216e+02 1.6960468692350645e+02 1.6747989044219403e+02 0 0 0
1033 1 3 -4.9000000000000002e-02 1.6166359629348983e+02 1.7058571891238566e+02 1.6790302063459222e+02 0 0 0
1032 1 2 -5.2999999999999999e-02 1.6262809957657481e+02 1.7119695811835348e+02 1.6865614610282699e+02 0 0 0
1036 1 6 -1.2100000000000000e-01 1.6042529649027895e+02 1.7122770255306807e+02 1.6783245101137962e+02 0 0 0
1001 1 22 -6.0999999999999999e-02 1.6385797171135053e+02 1.7065245015077858e+02 1.6912091872337626e+02 0 0 0
1000 1 21 -6.8000000000000005e-02 1.6434282830567238e+02 1.7050013956465915e+02 1.7041071053226605e+02 0 0 0
942 1 8 -4.3600000000000000e-01 1.7094508039075376e+02 1.6770480564617671e+02 1.6593559718554107e+02 0 0 0
944 1 10 5.9999999999999998e-02 1.7150718848279391e+02 1.6975653623614437e+02 1.6622188269350951e+02 0 0 0
931 1 4 2.3200000000000001e-01 1.7072000274976267e+02 1.6739939496404713e+02 1.6723440296156130e+02 0 0 0
937 1 4 2.3200000000000001e-01 1.7022783149679734e+02 1.6655040984461976e+02 1.7001327572686094e+02 0 0 0
968 1 8 -4.3600000000000000e-01 1.6989697275617152e+02 1.6599780724804322e+02 1.7124027184304725e+02 0 0 0
994 1 15 -6.0000000000000001e-03 1.6514673044372816e+02 1.7028386556275083e+02 1.6794704529916152e+02 0 0 0
938 1 5 -7.0000000000000001e-03 1.6960312887860212e+02 1.6785170015121815e+02 1.6799311395984688e+02 0 0 0
934 1 1 -6.2000000000000000e-02 1.6832474340895669e+02 1.6890369759626674e+02 1.6738732452336325e+02 0 0 0
935 1 2 -5.2999999999999999e-02 1.6745293837422457e+02 1.6882790549026601e+02 1.6895276761595582e+02 0 0 0
939 1 6 -1.2100000000000000e-01 1.6930134962216991e+02 1.6741221913933785e+02 1.6931005159516479e+02 0 0 0
936 1 3 -4.9000000000000002e-02 1.6801326535800217e+02 1.6794533123267962e+02 1.6976238084471970e+02 0 0 0
995 1 16 -8.6999999999999994e-02 1.6621999314265074e+02 1.6959283313347103e+02 1.6920735504592366e+02 0 0 0
941 1 7 1.3700000000000001e-01 1.6769317074470223e+02 1.6771563133785443e+02 1.7076795401304395e+02 0 0 0
996 1 17 7.6999999999999999e-02 1.6562523706539915e+02 1.6985653137288776e+02 1.7043241854351805e+02 0 0 0
945 1 10 5.9999999999999998e-02 1.7284925485062533e+02 1.6877146593498446e+02 1.6607275866562273e+02 0 0 0
933 1 6 -1.2100000000000000e-01 1.7158456931905653e+02 1.6649082084142483e+02 1.6791683169760074e+02 0 0 0
940 1 7 1.3700000000000001e-01 1.7333076156680644e+02 1.6609071379164990e+02 1.6660287361191570e+02 0 0 0
930 1 3 -4.9000000000000002e-02 1.7285466890117553e+02 1.6583433646875002e+02 1.6753775672869293e+02 0 0 0
899 1 23 -1.8300000000000000e-01 1.7522051040757816e+02 1.6568454708383447e+02 1.7090563320552803e+02 0 0 0
932 1 5 -7.0000000000000001e-03 1.7134954043028264e+02 1.6617996151418251e+02 1.6932068262679473e+02 0 0 0
906 1 29 -5.9999999999999998e-02 1.8121863590120211e+02 1.6417395063202002e+02 1.7349723015652918e+02 0 0 0
907 1 12 5.9999999999999998e-02 1.8174222095693332e+02 1.6394264837151601e+02 1.7256962142775362e+02 0 0 0
919 1 12 5.9999999999999998e-02 1.8249451006744826e+02 1.6168613423407888e+02 1.7346830879868546e+02 0 0 0
926 1 12 5.9999999999999998e-02 1.8334314657970015e+02 1.5919959407199443e+02 1.7458044140687107e+02 0 0 0
918 1 13 -1.2000000000000000e-01 1.8188392413827137e+02 1.6176843349023412e+02 1.7436748152822153e+02 0 0 0
920 1 12 5.9999999999999998e-02 1.8263674101576109e+02 1.6225073762783339e+02 1.7499097929670171e+02 0 0 0
1171 1 12 5.9999999999999998e-02 1.4110868777149346e+02 1.6885086901604350e+02 1.7151512587163501e+02 0 0 0
1163 1 12 5.9999999999999998e-02 1.4488511163281783e+02 1.7123203551739570e+02 1.7065265506900789e+02 0 0 0
1156 1 12 5.9999999999999998e-02 1.4688389039007552e+02 1.7000510314171351e+02 1.7087887459509741e+02 0 0 0
1154 1 13 -1.2000000000000000e-01 1.4726407482827713e+02 1.7059265823991049e+02 1.7171454143832256e+02 0 0 0
1162 1 12 5.9999999999999998e-02 1.4432467419761022e+02 1.7248235437102787e+02 1.7175023079425719e+02 0 0 0
1169 1 12 5.9999999999999998e-02 1.4198056773193099e+02 1.7134012465469206e+02 1.7193132388426048e+02 0 0 0
1164 1 13 -1.2000000000000000e-01 1.4394799269906346e+02 1.7052583331427712e+02 1.7238650870901085e+02 0 0 0
1161 1 13 -1.2000000000000000e-01 1.4483085257488642e+02 1.7151816798565369e+02 1.7170302841465818e+02 0 0 0
1167 1 13 -1.2000000000000000e-01 1.4257944968274774e+02 1.7044163107154944e+02 1.7178249539344793e+02 0 0 0
1170 1 14 -1.7999999999999999e-01 1.4192245884401265e+02 1.6906779630218563e+02 1.7220709349761162e+02 0 0 0
1166 1 12 5.9999999999999998e-02 1.4439950962610862e+02 1.6954215100537596e+02 1.7225765097675213e+02 0 0 0
1168 1 12 5.9999999999999998e-02 1.4258883295735316e+02 1.7035010504109769e+02 1.7069638527682713e+02 0 0 0
1151 1 10 5.9999999999999998e-02 1.4706468956504932e+02 1.7295915256816659e+02 1.7065295139166926e+02 0 0 0
1105 1 23 -1.8300000000000000e-01 1.4981505424184698e+02 1.7138732923170554e+02 1.6888681768673717e+02 0 0 0
1102 1 20 4.0799999999999997e-01 1.5107684728401858e+02 1.7111532999778697e+02 1.6850596685218849e+02 0 0 0
1103 1 21 -6.8000000000000005e-02 1.5214042638684830e+02 1.7208294344214031e+02 1.6870374154239983e+02 0 0 0
1104 1 22 -6.0999999999999999e-02 1.5221265826175386e+02 1.7336121682563822e+02 1.6928028298753270e+02 0 0 0
1134 1 1 -6.2000000000000000e-02 1.5160047430452050e+02 1.7591401870454550e+02 1.7019323390379662e+02 0 0 0
1135 1 2 -5.2999999999999999e-02 1.5135542494612741e+02 1.7414779040547987e+02 1.7012095404463619e+02 0 0 0
1155 1 12 5.9999999999999998e-02 1.4811027684059508e+02 1.7105970034546343e+02 1.7121064268760068e+02 0 0 0
1136 1 3 -4.9000000000000002e-02 1.5023678784675639e+02 1.7376838890119848e+02 1.7076057917836212e+02 0 0 0
1146 1 7 1.3700000000000001e-01 1.4981599660460247e+02 1.7277395312973943e+02 1.7078136924736560e+02 0 0 0
1042 1 6 -1.2100000000000000e-01 1.5803422418812923e+02 1.7257630502315578e+02 1.6841090769307087e+02 0 0 0
1041 1 5 -7.0000000000000001e-03 1.5808315955734241e+02 1.7143963060771890e+02 1.6758526387471971e+02 0 0 0
1038 1 2 -5.2999999999999999e-02 1.5575712458411920e+02 1.7232527543612480e+02 1.6798861682920585e+02 0 0 0
1098 1 16 -8.6999999999999994e-02 1.5439379379818547e+02 1.7250397128943530e+02 1.6821719413708647e+02 0 0 0
1099 1 17 7.6999999999999999e-02 1.5336241922321506e+02 1.7161665412375240e+02 1.6812620539308239e+02 0 0 0
1039 1 3 -4.9000000000000002e-02 1.5676346811230246e+02 1.7310885315426708e+02 1.6852512868506091e+02 0 0 0
1044 1 7 1.3700000000000001e-01 1.5664067075207089e+02 1.7402893130584928e+02 1.6907719480727931e+02 0 0 0
1097 1 15 -6.0000000000000001e-03 1.5385817017044866e+02 1.7389131854718951e+02 1.6915487196096097e+02 0 0 0
1040 1 4 2.3200000000000001e-01 1.5926373722325530e+02 1.7310174824321473e+02 1.6890509402739644e+02 0 0 0
1031 1 1 -6.2000000000000000e-02 1.6196770790613232e+02 1.7275117974799284e+02 1.6924119635456003e+02 0 0 0
1035 1 5 -7.0000000000000001e-03 1.6042921260022507e+02 1.7238093605696963e+02 1.6860338434672104e+02 0 0 0
1073 1 10 5.9999999999999998e-02 1.5910927338358482e+02 1.7538208257632084e+02 1.6805973567128243e+02 0 0 0
1071 1 8 -4.3600000000000000e-01 1.5935352092406561e+02 1.7420119856725961e+02 1.6973551640905075e+02 0 0 0
1072 1 9 1.6900000000000001e-01 1.5978015411330810e+02 1.7530969867561541e+02 1.6891576128100289e+02 0 0 0
1074 1 10 5.9999999999999998e-02 1.6079143991014601e+02 1.7527132425586311e+02 1.6851088038328655e+02 0 0 0
1075 1 11 1.0000000000000001e-01 1.5981016865247142e+02 1.7666945326698112e+02 1.6973573091239112e+02 0 0 0
1076 1 12 5.9999999999999998e-02 1.5892255132880186e+02 1.7669622403255414e+02 1.7036780591809239e+02 0 0 0
1085 1 12 5.9999999999999998e-02 1.6205971519783100e+02 1.7667136243217246e+02 1.7014111716298009e+02 0 0 0
1084 1 13 -1.2000000000000000e-01 1.6108938801570855e+02 1.7667971197287804e+02 1.7063760024617659e+02 0 0 0
1081 1 12 5.9999999999999998e-02 1.6065111648504066e+02 1.7877270785113942e+02 1.6706850421122658e+02 0 0 0
1079 1 12 5.9999999999999998e-02 1.5896351091905325e+02 1.7761535834172423e+02 1.6797232638450475e+02 0 0 0
1080 1 14 -1.7999999999999999e-01 1.6094567164895679e+02 1.7802530745968610e+02 1.6780520629997929e+02 0 0 0
1083 1 12 5.9999999999999998e-02 1.6122781072992967e+02 1.7716360077826778e+02 1.6720026072457981e+02 0 0 0
1077 1 13 -1.2000000000000000e-01 1.5968891468151614e+02 1.7784145880072458e+02 1.6875384315143904e+02 0 0 0
1078 1 12 5.9999999999999998e-02 1.5936054243867517e+02 1.7872798583039844e+02 1.6929637587699284e+02 0 0 0
1082 1 12 5.9999999999999998e-02 1.6185712961539812e+02 1.7825797956985735e+02 1.6835584962889877e+02 0 0 0
1086 1 12 5.9999999999999998e-02 1.6106555844270724e+02 1.7765956883537632e+02 1.7111447833581724e+02 0 0 0
864 1 12 5.9999999999999998e-02 1.8098813144104497e+02 1.5160000828999213e+02 1.7194762473696889e+02 0 0 0
861 1 14 -1.7999999999999999e-01 1.8183116588654354e+02 1.5177204346938373e+02 1.7127844846755806e+02 0 0 0
807 1 12 5.9999999999999998e-02 1.8143714129358204e+02 1.4493612160676363e+02 1.6984336037468378e+02 0 0 0
808 1 14 -1.7999999999999999e-01 1.8000115833922538e+02 1.4608120661397666e+02 1.7092051648722682e+02 0 0 0
809 1 12 5.9999999999999998e-02 1.7996151534771400e+02 1.4697925195781778e+02 1.7153699275872825e+02 0 0 0
810 1 12 5.9999999999999998e-02 1.7969106665772856e+02 1.4532172427455879e+02 1.7163824188238252e+02 0 0 0
811 1 12 5.9999999999999998e-02 1.7927719146392985e+02 1.4606863421423401e+02 1.7010576877147554e+02 0 0 0
862 1 12 5.9999999999999998e-02 1.8185284059233152e+02 1.5083919682390950e+02 1.7071504156013322e+02 0 0 0
846 1 12 5.9999999999999998e-02 1.7912253905194481e+02 1.5777178600775076e+02 1.7237132952582752e+02 0 0 0
844 1 12 5.9999999999999998e-02 1.7894154117983410e+02 1.5553032601076166e+02 1.7122413742836471e+02 0 0 0
855 1 13 -1.2000000000000000e-01 1.8119979691494930e+02 1.5421138324432769e+02 1.7113077394071624e+02 0 0 0
856 1 12 5.9999999999999998e-02 1.8031175117802920e+02 1.5390003854684969e+02 1.7168080961494675e+02 0 0 0
845 1 13 -1.2000000000000000e-01 1.7999204598330545e+02 1.5716565737185761e+02 1.7211703447190087e+02 0 0 0
848 1 14 -1.7999999999999999e-01 1.8030154515471551e+02 1.5648565525458201e+02 1.7348972414773928e+02 0 0 0
850 1 12 5.9999999999999998e-02 1.8136263585503963e+02 1.5625448217352630e+02 1.7358324169327420e+02 0 0 0
847 1 12 5.9999999999999998e-02 1.8069812830050211e+02 1.5791679909453956e+02 1.7176300915278765e+02 0 0 0
857 1 12 5.9999999999999998e-02 1.8201026930242736e+02 1.5448959165425487e+02 1.7180444666792664e+02 0 0 0
863 1 12 5.9999999999999998e-02 1.8272011896673123e+02 1.5169645206863032e+02 1.7190466597106030e+02 0 0 0
1113 1 12 5.9999999999999998e-02 1.5081820289446864e+02 1.6482891031734334e+02 1.6554704017804667e+02 0 0 0
989 1 12 5.9999999999999998e-02 1.6818272824189455e+02 1.6961005597467044e+02 1.7460241780572684e+02 0 0 0
982 1 12 5.9999999999999998e-02 1.6923102447793278e+02 1.6727389609673662e+02 1.7459495893524706e+02 0 0 0
986 1 12 5.9999999999999998e-02 1.6983443986985901e+02 1.6893850170024768e+02 1.7628501810289745e+02 0 0 0
983 1 12 5.9999999999999998e-02 1.7085313011101255e+02 1.6715743173309517e+02 1.7496548766902711e+02 0 0 0
902 1 26 7.1099999999999997e-01 1.7796290394762732e+02 1.6496954077708185e+02 1.7189341999470315e+02 0 0 0
851 1 12 5.9999999999999998e-02 1.7968384923767738e+02 1.5561112981052273e+02 1.7369406946050648e+02 0 0 0
849 1 12 5.9999999999999998e-02 1.8000038437201010e+02 1.5717896252704455e+02 1.7427504396504247e+02 0 0 0
905 1 28 2.9999999999999999e-02 1.7936939220712352e+02 1.6508194700509981e+02 1.7403436962866141e+02 0 0 0
912 1 12 5.9999999999999998e-02 1.8158283469147798e+02 1.6424129868893698e+02 1.7630623262330838e+02 0 0 0
1157 1 14 -1.7999999999999999e-01 1.4778789963600212e+02 1.6954802354046146e+02 1.7273828487271220e+02 0 0 0
1160 1 12 5.9999999999999998e-02 1.4845859306842084e+02 1.6991453688451759e+02 1.7351541955564002e+02 0 0 0
1236 1 12 5.9999999999999998e-02 1.4416941050429102e+02 1.6892420693883852e+02 1.7519579409129085e+02 0 0 0
1234 1 12 5.9999999999999998e-02 1.4332581401117130e+02 1.6887550796853384e+02 1.7669982509231235e+02 0 0 0
1110 1 28 2.9999999999999999e-02 1.5072314497180139e+02 1.6576881891523482e+02 1.6786591002089150e+02 0 0 0
1112 1 29 -5.9999999999999998e-02 1.5110760317512342e+02 1.6587774806858766e+02 1.6561251421199688e+02 0 0 0
1159 1 12 5.9999999999999998e-02 1.4697490014661469e+02 1.6914986640532840e+02 1.7334541149945480e+02 0 0 0
1125 1 12 5.9999999999999998e-02 1.5316953770491065e+02 1.6463963507636279e+02 1.6741979509926364e+02 0 0 0
1123 1 12 5.9999999999999998e-02 1.5296841842030798e+02 1.6563487486085614e+02 1.6456431294343363e+02 0 0 0
1126 1 12 5.9999999999999998e-02 1.5312518974486306e+02 1.6370226124486658e+02 1.6597449308803758e+02 0 0 0
1130 1 14 -1.7999999999999999e-01 1.5566556088110784e+02 1.6355802231412926e+02 1.6691347827994107e+02 0 0 0
1131 1 12 5.9999999999999998e-02 1.5533502484409095e+02 1.6338956464392285e+02 1.6793840165663889e+02 0 0 0
1133 1 12 5.9999999999999998e-02 1.5544581944509770e+02 1.6260713458501084e+02 1.6642806472204094e+02 0 0 0
1132 1 12 5.9999999999999998e-02 1.5673004905907746e+02 1.6374948016021398e+02 1.6704878851288473e+02 0 0 0
1121 1 13 -1.2000000000000000e-01 1.5265027104289027e+02 1.6576596331906427e+02 1.6559857503530398e+02 0 0 0
1124 1 13 -1.2000000000000000e-01 1.5339175309522099e+02 1.6468874842431697e+02 1.6635381752006253e+02 0 0 0
1127 1 13 -1.2000000000000000e-01 1.5494091857235355e+02 1.6472105012962678e+02 1.6628378539120692e+02 0 0 0
1129 1 12 5.9999999999999998e-02 1.5537016912729067e+02 1.6462592486113431e+02 1.6528639113995413e+02 0 0 0
1122 1 12 5.9999999999999998e-02 1.5308541094890754e+02 1.6671399954977375e+02 1.6591477207533148e+02 0 0 0
1128 1 12 5.9999999999999998e-02 1.5532915553230367e+02 1.6562173674050200e+02 1.6675932266637892e+02 0 0 0
1025 1 12 5.9999999999999998e-02 1.5817107998360450e+02 1.6944246132690876e+02 1.7282935122530012e+02 0 0 0
1012 1 12 5.9999999999999998e-02 1.5949385124336365e+02 1.7154518987595210e+02 1.7706386545457656e+02 0 0 0
999 1 20 4.0799999999999997e-01 1.6386851368223327e+02 1.7069477999890870e+02 1.7173196137389684e+02 0 0 0
1002 1 23 -1.8300000000000000e-01 1.6270442535700224e+02 1.7120746846076335e+02 1.7189763754474103e+02 0 0 0
1004 1 25 -2.8899999999999998e-01 1.6304058658061012e+02 1.7033483237424380e+02 1.7441616789063588e+02 0 0 0
1018 1 13 -1.2000000000000000e-01 1.6014169381243252e+02 1.7101289921776544e+02 1.7459177470763387e+02 0 0 0
1020 1 12 5.9999999999999998e-02 1.5911060217162870e+02 1.7119052722640890e+02 1.7489738609777703e+02 0 0 0
1010 1 12 5.9999999999999998e-02 1.6107306629270695e+02 1.6984919271609391e+02 1.7618786358879021e+02 0 0 0
1009 1 29 -5.9999999999999998e-02 1.6106417591256485e+02 1.7087788823852827e+02 1.7582757692061551e+02 0 0 0
1024 1 13 -1.2000000000000000e-01 1.5914113533081013e+02 1.6973190495666350e+02 1.7242522870753385e+02 0 0 0
1021 1 13 -1.2000000000000000e-01 1.6013883960907745e+02 1.6977025147977773e+02 1.7363960738428423e+02 0 0 0
1023 1 12 5.9999999999999998e-02 1.6011793427403668e+02 1.6887149150464188e+02 1.7425596237500150e+02 0 0 0
1005 1 26 7.1099999999999997e-01 1.6435948665434842e+02 1.7042094052046619e+02 1.7417342979442418e+02 0 0 0
1011 1 13 -1.2000000000000000e-01 1.6055807346871376e+02 1.7174879416389334e+02 1.7694522149318283e+02 0 0 0
1006 1 27 1.9000000000000000e-01 1.6250597234107013e+02 1.7115287817239169e+02 1.7549991443292907e+02 0 0 0
1007 1 28 2.9999999999999999e-02 1.6310804307652876e+02 1.7101468715048267e+02 1.7639797572101818e+02 0 0 0
1015 1 12 5.9999999999999998e-02 1.6146714605595594e+02 1.7064317320319074e+02 1.7874793976641718e+02 0 0 0
973 1 12 5.9999999999999998e-02 1.6979548164578341e+02 1.6838941779172194e+02 1.7232702371030354e+02 0 0 0
997 1 18 -6.2000000000000000e-02 1.6621410553558144e+02 1.6976779456969567e+02 1.7214245773843959e+02 0 0 0
998 1 19 -3.7100000000000000e-01 1.6470452021635370e+02 1.7039678673545143e+02 1.7275463741630929e+02 0 0 0
987 1 13 -1.2000000000000000e-01 1.6907966118697883e+02 1.7020559475583403e+02 1.7477255084860428e+02 0 0 0
988 1 12 5.9999999999999998e-02 1.6937028902799594e+02 1.7062742922607364e+02 1.7381042239485680e+02 0 0 0
981 1 13 -1.2000000000000000e-01 1.7016346306671042e+02 1.6781599336429707e+02 1.7443751423604826e+02 0 0 0
985 1 12 5.9999999999999998e-02 1.7112215418500867e+02 1.6960803418478500e+02 1.7523728904906127e+02 0 0 0
984 1 13 -1.2000000000000000e-01 1.7011837463722100e+02 1.6918384878174942e+02 1.7526164822224942e+02 0 0 0
993 1 12 5.9999999999999998e-02 1.6988308169757562e+02 1.7163968604974920e+02 1.7634410076741543e+02 0 0 0
990 1 14 -1.7999999999999999e-01 1.6895091271629437e+02 1.7127188681747100e+02 1.7591528287273815e+02 0 0 0
992 1 12 5.9999999999999998e-02 1.6836645043624731e+02 1.7213675069078849e+02 1.7560141295654105e+02 0 0 0
991 1 12 5.9999999999999998e-02 1.6835511344374817e+02 1.7085557175212597e+02 1.7672756670355437e+02 0 0 0
972 1 11 1.0000000000000001e-01 1.7052569000318431e+02 1.6782440167412463e+02 1.7290637899131605e+02 0 0 0
1003 1 24 -4.9900000000000000e-01 1.6518001373492581e+02 1.7042868578573169e+02 1.7503314456167618e+02 0 0 0
970 1 10 5.9999999999999998e-02 1.7176513901552448e+02 1.6629854759749949e+02 1.7205793070780609e+02 0 0 0
976 1 12 5.9999999999999998e-02 1.7172830370517167e+02 1.6897135689071561e+02 1.7166482902254063e+02 0 0 0
969 1 9 1.6900000000000001e-01 1.7072041884569950e+02 1.6644731268927646e+02 1.7233092999702919e+02 0 0 0
980 1 12 5.9999999999999998e-02 1.7344728046436626e+02 1.6740730450689856e+02 1.7309247038498816e+02 0 0 0
977 1 14 -1.7999999999999999e-01 1.7306257044185926e+02 1.6839712946132545e+02 1.7333812213778495e+02 0 0 0
978 1 12 5.9999999999999998e-02 1.7372721223875669e+02 1.6911945517411317e+02 1.7286420558176167e+02 0 0 0
974 1 13 -1.2000000000000000e-01 1.7168582552387602e+02 1.6878392165596105e+02 1.7273775196844636e+02 0 0 0
975 1 12 5.9999999999999998e-02 1.7154630687381069e+02 1.6975686874113291e+02 1.7320892975785728e+02 0 0 0
979 1 12 5.9999999999999998e-02 1.7307026744591775e+02 1.6862462189688438e+02 1.7440409022058719e+02 0 0 0
971 1 10 5.9999999999999998e-02 1.7067636280836822e+02 1.6566832130769623e+02 1.7309206827487412e+02 0 0 0
900 1 24 -4.9900000000000000e-01 1.7768755547168576e+02 1.6604779326326582e+02 1.7242054550408349e+02 0 0 0
904 1 28 2.9999999999999999e-02 1.8030009813133324e+02 1.6584436823484242e+02 1.7272438513801680e+02 0 0 0
903 1 27 1.9000000000000000e-01 1.7996005716828734e+02 1.6489477895757489e+02 1.7313760704998413e+02 0 0 0
908 1 13 -1.2000000000000000e-01 1.8221935719838862e+02 1.6506431235006983e+02 1.7433763476519565e+02 0 0 0
909 1 12 5.9999999999999998e-02 1.8239925042858982e+02 1.6604955907079525e+02 1.7390748670681336e+02 0 0 0
913 1 12 5.9999999999999998e-02 1.8084124734363249e+02 1.6580535840874674e+02 1.7590349767877419e+02 0 0 0
910 1 12 5.9999999999999998e-02 1.8323223122825712e+02 1.6467476674999961e+02 1.7423545634433859e+02 0 0 0
911 1 14 -1.7999999999999999e-01 1.8173754620015526e+02 1.6519386012265190e+02 1.7579948705831117e+02 0 0 0
914 1 12 5.9999999999999998e-02 1.8246930706506456e+02 1.6571266721898166e+02 1.7641873273835571e+02 0 0 0
1165 1 12 5.9999999999999998e-02 1.4386846312839586e+02 1.7077164730677228e+02 1.7344544698668693e+02 0 0 0
1173 1 12 5.9999999999999998e-02 1.4152467832811362e+02 1.6908801388008385e+02 1.7322171757652029e+02 0 0 0
1150 1 10 5.9999999999999998e-02 1.4616708833746793e+02 1.7389529613287215e+02 1.7191606088620094e+02 0 0 0
1225 1 12 5.9999999999999998e-02 1.4240000588707704e+02 1.7341163281246847e+02 1.7635848485761267e+02 0 0 0
1231 1 12 5.9999999999999998e-02 1.4403642592514240e+02 1.7156091737382937e+02 1.7550357800350119e+02 0 0 0
1152 1 11 1.0000000000000001e-01 1.4626047143818025e+02 1.7173004699715221e+02 1.7222719661604319e+02 0 0 0
1149 1 9 1.6900000000000001e-01 1.4690106881429276e+02 1.7311381344213379e+02 1.7171944583235407e+02 0 0 0
1153 1 12 5.9999999999999998e-02 1.4625893990469174e+02 1.7179513431713912e+02 1.7331525051874382e+02 0 0 0
1228 1 12 5.9999999999999998e-02 1.4342766305434506e+02 1.7165411095600206e+02 1.7785660516494724e+02 0 0 0
1230 1 13 -1.2000000000000000e-01 1.4333576146703237e+02 1.7083069032963337e+02 1.7590847078719500e+02 0 0 0
1232 1 12 5.9999999999999998e-02 1.4250834833274479e+02 1.7062189766939008e+02 1.7523031657703325e+02 0 0 0
1235 1 12 5.9999999999999998e-02 1.4499379435301364e+02 1.6968455972304230e+02 1.7656337117305014e+02 0 0 0
1233 1 14 -1.7999999999999999e-01 1.4401895388258575e+02 1.6948394897322910e+02 1.7611891487141929e+02 0 0 0
1224 1 13 -1.2000000000000000e-01 1.4180078785579656e+02 1.7265896632691926e+02 1.7687086258050954e+02 0 0 0
1227 1 13 -1.2000000000000000e-01 1.4265474617127549e+02 1.7142175062576916e+02 1.7712400147332400e+02 0 0 0
1138 1 5 -7.0000000000000001e-03 1.5033885556019328e+02 1.7612488930506467e+02 1.7136079780267320e+02 0 0 0
1158 1 12 5.9999999999999998e-02 1.4822747160258425e+02 1.6865259588207789e+02 1.7229886957979653e+02 0 0 0
1139 1 6 -1.2100000000000000e-01 1.4963303364127748e+02 1.7486282007104663e+02 1.7150501920742403e+02 0 0 0
1137 1 4 2.3200000000000001e-01 1.4853438729471588e+02 1.7477917849206645e+02 1.7231844781046016e+02 0 0 0
1144 1 5 -7.0000000000000001e-03 1.4805120498095476e+02 1.7585311310243014e+02 1.7305678013977803e+02 0 0 0
1148 1 8 -4.3600000000000000e-01 1.4798006518591086e+02 1.7354865466972777e+02 1.7258350954936105e+02 0 0 0
1191 1 12 5.9999999999999998e-02 1.5464798948327334e+02 1.7688713811667404e+02 1.7190683271057352e+02 0 0 0
1193 1 13 -1.2000000000000000e-01 1.5571387981684987e+02 1.7589918361401635e+02 1.7342729073522963e+02 0 0 0
1196 1 14 -1.7999999999999999e-01 1.5689335783435288e+02 1.7572218512662036e+02 1.7238638973766902e+02 0 0 0
1197 1 12 5.9999999999999998e-02 1.5780326174046473e+02 1.7548130600253799e+02 1.7293607407520594e+02 0 0 0
1199 1 12 5.9999999999999998e-02 1.5671447167122136e+02 1.7500420688149856e+02 1.7158601042694997e+02 0 0 0
1190 1 13 -1.2000000000000000e-01 1.5436756914893127e+02 1.7644320583016696e+02 1.7286202305584328e+02 0 0 0
1195 1 12 5.9999999999999998e-02 1.5538437554021968e+02 1.7501767344047406e+02 1.7397726055215244e+02 0 0 0
1194 1 12 5.9999999999999998e-02 1.5617686850907310e+02 1.7653197166806754e+02 1.7418447023704536e+02 0 0 0
1198 1 12 5.9999999999999998e-02 1.5706253114443476e+02 1.7669920133606891e+02 1.7193370914174864e+02 0 0 0
1030 1 12 5.9999999999999998e-02 1.5877447587131215e+02 1.7193041664641834e+02 1.7219409500183170e+02 0 0 0
1028 1 12 5.9999999999999998e-02 1.5808072909681925e+02 1.7093515388016027e+02 1.7099259809779329e+02 0 0 0
1027 1 14 -1.7999999999999999e-01 1.5896300928929736e+02 1.7101873461724747e+02 1.7162718136445989e+02 0 0 0
1192 1 12 5.9999999999999998e-02 1.5362041459468151e+02 1.7567318979608922e+02 1.7266983724065636e+02 0 0 0
1092 1 12 5.9999999999999998e-02 1.6314941943274448e+02 1.7579503172269153e+02 1.7224783198257759e+02 0 0 0
1089 1 12 5.9999999999999998e-02 1.6090753931087625e+02 1.7634636983865582e+02 1.7272974363729170e+02 0 0 0
1091 1 12 5.9999999999999998e-02 1.6256805912396732e+02 1.7433758559827339e+02 1.7132767983362385e+02 0 0 0
1087 1 13 -1.2000000000000000e-01 1.6101618664671466e+02 1.7573558938310174e+02 1.7183350537935300e+02 0 0 0
1090 1 13 -1.2000000000000000e-01 1.6235574189149614e+02 1.7505961508197348e+02 1.7211615609753841e+02 0 0 0
1088 1 12 5.9999999999999998e-02 1.6015251388666869e+02 1.7508122102935022e+02 1.7171530448905722e+02 0 0 0
1029 1 12 5.9999999999999998e-02 1.5980740064646650e+02 1.7118846450584240e+02 1.7095912825099580e+02 0 0 0
1026 1 12 5.9999999999999998e-02 1.5937611798177400e+02 1.6893068715983372e+02 1.7172456208000656e+02 0 0 0
1022 1 12 5.9999999999999998e-02 1.6116609782392851e+02 1.6981000660146975e+02 1.7327730895303878e+02 0 0 0
1095 1 12 5.9999999999999998e-02 1.6200642662284375e+02 1.7466665733448144e+02 1.7430241052805977e+02 0 0 0
1096 1 12 5.9999999999999998e-02 1.6321756008435116e+02 1.7363153592221499e+02 1.7349547302787570e+02 0 0 0
1093 1 14 -1.7999999999999999e-01 1.6225106739403330e+02 1.7412417810955890e+02 1.7338919249122549e+02 0 0 0
1094 1 12 5.9999999999999998e-02 1.6146877551386959e+02 1.7338859909477534e+02 1.7320199592378876e+02 0 0 0
1008 1 28 2.9999999999999999e-02 1.6249931952546459e+02 1.7222117660899823e+02 1.7528359477602606e+02 0 0 0
1019 1 12 5.9999999999999998e-02 1.6025714755669370e+02 1.7186849051071789e+02 1.7392639208882090e+02 0 0 0
1140 1 1 -6.2000000000000000e-02 1.4669321399341152e+02 1.7595677695378058e+02 1.7415386562535582e+02 0 0 0
1200 1 15 -6.0000000000000001e-03 1.4637056175332984e+02 1.8011056819499029e+02 1.7569620132690980e+02 0 0 0
1207 1 22 -6.0999999999999999e-02 1.4489746013430664e+02 1.8040770287999470e+02 1.7657796026661174e+02 0 0 0
1238 1 31 -0.0000000000000000e+00 1.4463733708943198e+02 1.8138958931276997e+02 1.7694488673698027e+02 0 0 0
1201 1 16 -8.6999999999999994e-02 1.4597874901558555e+02 1.7854764168195311e+02 1.7509036159330063e+02 0 0 0
1202 1 17 7.6999999999999999e-02 1.4476468581162010e+02 1.7818666063809775e+02 1.7567083387946801e+02 0 0 0
1206 1 21 -6.8000000000000005e-02 1.4416152067244718e+02 1.7919322446926878e+02 1.7648811631569424e+02 0 0 0
1205 1 20 4.0799999999999997e-01 1.4291939461955613e+02 1.7867971521530501e+02 1.7699264414903251e+02 0 0 0
1203 1 18 -6.2000000000000000e-02 1.4389704397312838e+02 1.7663123697230029e+02 1.7556359365099732e+02 0 0 0
1143 1 4 2.3200000000000001e-01 1.4992136539482243e+02 1.7725687211204155e+02 1.7210899571571596e+02 0 0 0
1177 1 10 5.9999999999999998e-02 1.5247686084291570e+02 1.7794679366026295e+02 1.7173302686051090e+02 0 0 0
1174 1 8 -4.3600000000000000e-01 1.5048583663046966e+02 1.7849827366631015e+02 1.7209608583515285e+02 0 0 0
1176 1 10 5.9999999999999998e-02 1.5220162018234237e+02 1.7951254468724264e+02 1.7248254504082615e+02 0 0 0
1175 1 9 1.6900000000000001e-01 1.5188541074310422e+02 1.7846942122732645e+02 1.7248478960945840e+02 0 0 0
1178 1 11 1.0000000000000001e-01 1.5223890149742994e+02 1.7781970128023019e+02 1.7393877584668894e+02 0 0 0
1182 1 12 5.9999999999999998e-02 1.5254698297402317e+02 1.7955309422163404e+02 1.7499529897446584e+02 0 0 0
1141 1 2 -5.2999999999999999e-02 1.4692960922754037e+02 1.7768923919360753e+02 1.7434795170219900e+02 0 0 0
1142 1 3 -4.9000000000000002e-02 1.4804438400902478e+02 1.7815818371578376e+02 1.7367980222178704e+02 0 0 0
1145 1 6 -1.2100000000000000e-01 1.4877241264531506e+02 1.7715068275417295e+02 1.7292887542811792e+02 0 0 0
1179 1 12 5.9999999999999998e-02 1.5166160008419195e+02 1.7689537159368734e+02 1.7391785435417492e+02 0 0 0
1147 1 7 1.3700000000000001e-01 1.4835878978353725e+02 1.7919118691742372e+02 1.7365850916294701e+02 0 0 0
1181 1 12 5.9999999999999998e-02 1.5078242022663062e+02 1.7919417385954205e+02 1.7473677030503717e+02 0 0 0
1186 1 12 5.9999999999999998e-02 1.5130335091515269e+02 1.7890678291538467e+02 1.7717724537473634e+02 0 0 0
1180 1 13 -1.2000000000000000e-01 1.5175254692574646e+02 1.7880883867095832e+02 1.7505057152347683e+02 0 0 0
1183 1 14 -1.7999999999999999e-01 1.5170367140846454e+02 1.7819655107348055e+02 1.7645377164996071e+02 0 0 0
1184 1 12 5.9999999999999998e-02 1.5109164535508231e+02 1.7729558593372025e+02 1.7649603195703440e+02 0 0 0
1187 1 13 -1.2000000000000000e-01 1.5375688763739592e+02 1.7743108510567649e+02 1.7389943758166132e+02 0 0 0
1188 1 12 5.9999999999999998e-02 1.5424095360406812e+02 1.7837545348941944e+02 1.7365054304062369e+02 0 0 0
1189 1 12 5.9999999999999998e-02 1.5408185237157338e+02 1.7715651364814693e+02 1.7490298550615657e+02 0 0 0
1185 1 12 5.9999999999999998e-02 1.5269821981335687e+02 1.7806831859795048e+02 1.7688100701043706e+02 0 0 0
1014 1 14 -1.7999999999999999e-01 1.6126433496169886e+02 1.7160760375843114e+02 1.7828227744750342e+02 0 0 0
1017 1 12 5.9999999999999998e-02 1.6224698169030987e+02 1.7207923078589903e+02 1.7827371343274396e+02 0 0 0
1016 1 12 5.9999999999999998e-02 1.6069924725354744e+02 1.7221053666398836e+02 1.7899308527248434e+02 0 0 0
1013 1 12 5.9999999999999998e-02 1.6071895863073684e+02 1.7275964641005240e+02 1.7657053000452535e+02 0 0 0
1226 1 12 5.9999999999999998e-02 1.4110381665945485e+02 1.7240234970574861e+02 1.7607306620583202e+02 0 0 0
1214 1 28 2.9999999999999999e-02 1.3981605764737827e+02 1.7468014550500803e+02 1.7699107836799078e+02 0 0 0
1210 1 25 -2.8899999999999998e-01 1.4161129984073023e+02 1.7543435189591750e+02 1.7743862375719149e+02 0 0 0
1213 1 28 2.9999999999999999e-02 1.4001132483116166e+02 1.7506428626539793e+02 1.7868628527297491e+02 0 0 0
1217 1 13 -1.2000000000000000e-01 1.3990115288789809e+02 1.7235796457637386e+02 1.7856697874414587e+02 0 0 0
1220 1 14 -1.7999999999999999e-01 1.3951225523562962e+02 1.7262922462023928e+02 1.8004319344598437e+02 0 0 0
135 1 12 5.9999999999999998e-02 2.1488543790575531e+02 1.9152873018062849e+02 1.4037094355521299e+02 0 0 0
123 1 12 5.9999999999999998e-02 2.1725868378791645e+02 1.9068016330794961e+02 1.4011249931713562e+02 0 0 0
518 1 3 -4.9000000000000002e-02 1.9676967215425191e+02 1.5715372714043900e+02 1.4037680212120171e+02 0 0 0
471 1 12 5.9999999999999998e-02 2.0217023801855007e+02 1.6878708033733616e+02 1.4057054615324392e+02 0 0 0
470 1 12 5.9999999999999998e-02 2.0076836446478612e+02 1.6977179174573780e+02 1.4009602493928895e+02 0 0 0
532 1 10 5.9999999999999998e-02 1.9538332863660312e+02 1.5404846129860812e+02 1.4019526744500169e+02 0 0 0
133 1 12 5.9999999999999998e-02 2.1549944173054931e+02 1.8862674812061184e+02 1.4010155519204039e+02 0 0 0

Velocities

65 -5.8606286285586085e-03 2.9877088274045806e-02 2.0415370911952391e-02
61 -1.3523095220793604e-02 3.1526942832611635e-02 -4.5643336586714787e-03
66 5.0284899544536486e-03 -4.4868201259593340e-03 -4.1635666823103658e-03
64 -1.1457462727578808e-02 6.9717437376683403e-03 -2.0270927849156579e-03
63 -3.8659665859279231e-03 -4.4823670656364374e-03 -1.9669401286320637e-03
500 -1.9176545785138555e-02 1.2771678150147830e-02 2.0147200810912615e-02
498 -2.7940490888819447e-02 1.2235190406645129e-02 4.2750852518274925e-03
492 1.1762198978848250e-02 6.9234967878199494e-03 1.5101064958435970e-02
496 5.3314956197712607e-03 8.9469734635819979e-03 5.0908531939891496e-03
493 -1.1646121721968095e-02 1.5059206157711533e-02 -1.4337216412331837e-02
491 -1.0474394982526378e-03 1.0999438528333343e-02 2.4224321083198103e-04
499 1.3437833429990787e-03 2.3183329624344418e-03 -3.3552439243064134e-04
501 2.6496781422457611e-02 3.1573219668382837e-03 -1.1627407230388619e-02
502 3.8641582079394091e-03 8.7818635744822387e-03 3.1625882855756300e-03
494 -6.3573389465401795e-04 -4.5473024085782663e-03 1.1226452898788076e-03
497 -2.2084520721368560e-03 -1.7639685505903287e-02 -1.0117791120827200e-02
439 9.6428379021401729e-03 2.9093854816687552e-03 6.0850638656038030e-03
495 4.7830048984531005e-03 -1.4525112449517602e-02 -8.8540793034095847e-03
438 -4.5284291635167180e-03 2.1320383686463194e-02 2.9843760742256538e-02
436 -3.6633644983602434e-03 5.8331821270922448e-03 -7.7039233510797509e-03
434 -4.5180095987202044e-03 6.7658339770210521e-04 -1.5189045615645314e-02
433 5.0132539699319122e-03 6.6649184363805980e-03 -4.3292340634137321e-03
437 3.4765880672148449e-03 2.5972937365522961e-02 1.0843200921720081e-02
514 4.7107484900810147e-03 2.7820828438450591e-04 -4.5042600832311940e-03
435 5.9775641552352963e-03 -1.3981263749716082e-02 1.7133825838562242e-02
399 1.5800799951940885e-02 -8.8128620469552933e-03 6.9344432794863327e-03
432 4.9701663450000865e-03 1.6718031477770963e-02 -3.9825971217304712e-03
431 2.7442693145782113e-03 3.4503606084738802e-03 3.2869873517219427e-03
445 3.6564660787910383e-05 1.8424272605102078e-02 5.1765424147110703e-03
443 -8.0251162724940183e-04 -2.0849474082251869e-03 -4.9307227457321887e-04
442 -2.5749008021709065e-02 7.3634565351334089e-03 2.2377062988713577e-03
440 -1.3903852274649603e-03 8.8871340052360372e-04 -3.4844755482095428e-03
449 8.0409649608605713e-04 8.5930111685964521e-03 4.4624093356923937e-03
444 -5.1144833147918761e-03 2.2268598675180464e-02 -5.8794058344459733e-04
452 -1.7542687675091657e-02 -2.6296951992497864e-02 1.1666166399998077e-02
447 -2.5440624443239943e-02 1.7515689671588182e-02 -3.5322501860944979e-04
446 -2.7162057134446620e-03 -3.2255191593708425e-03 4.0157996585281769e-03
448 3.3312062627115962e-03 -1.0650682951397710e-02 -1.1676105677956263e-02
398 1.0403037420215909e-03 -1.2281833744713503e-02 2.1841303899514039e-02
451 6.4100327374386730e-03 -3.4426095398546089e-02 -2.0557346503022451e-02
450 3.1361781130791952e-03 7.4984464895111493e-03 5.2723796522765971e-03
441 -1.5345030105455453e-03 3.7783158350060317e-03 -9.3042181824610336e-03
373 6.5725762031323548e-03 1.9558102083852516e-02 -9.3215404427053634e-03
233 1.2698948173061454e-02 -6.6066818904385290e-03 -5.0461487859017884e-03
229 3.0490401209498953e-02 -9.6266441025988757e-03 -1.8328591268310182e-03
204 2.6301269050744915e-03 1.5675973911952305e-03 9.2313616848380183e-03
243 2.9760196385920771e-03 -5.7958421101054714e-03 -1.7571208683824571e-03
239 -8.1294453346657282e-03 1.8696480042881297e-02 -2.7193103301688301e-04
241 -2.4318037337115596e-03 -5.4674365521035313e-03 -3.0400852346326697e-03
245 6.5784866429522771e-03 1.1768763008371862e-02 -3.7450934300533069e-03
50 -3.0760041459026943e-05 -1.2873158692099178e-03 9.0797324315486701e-03
51 -1.6963431651776235e-02 -1.9154172987186111e-02 1.0511064107046796e-02
53 7.7147638494537612e-03 1.3689717508578946e-03 -7.8090300417067975e-03
52 -2.6687587099002590e-02 1.0640731955725520e-02 1.0851723437582048e-02
48 6.2627900210323294e-03 5.3068192980885217e-03 1.5994401333704314e-03
47 9.8474340271716555e-04 3.1572446086143876e-03 -1.1448197849647777e-03
49 8.7050703611179260e-03 4.4385082099746519e-04 -1.7563941701427124e-02
201 8.0699290605176135e-03 -6.2876504846336913e-03 1.1305039267422087e-02
202 1.3394381228423796e-02 5.1944170825747576e-03 -2.2473543989515964e-02
200 -5.6177779326854194e-03 3.7838113310305357e-03 -2.0503433143045048e-03
196 3.6491469477204427e-03 -1.4028572829473502e-02 1.8707340096704311e-02
194 3.1367851649193165e-03 6.6232637295561671e-03 9.3511423740539491e-03
185 7.3010026227666542e-03 3.4375870560138647e-03 3.0557466957880177e-03
197 2.2030132176545994e-03 2.4107527640821916e-03 6.2178898574184532e-04
198 -2.0934284515537926e-02 -6.3362443168362313e-03 4.0073073969439842e-02
195 -9.0431839527095759e-03 -2.9880051827235262e-03 -6.4002478386500344e-03
199 -2.1477631443237170e-02 -7.0681395633809332e-03 -3.6946949644773235e-02
184 -2.2756526121436339e-03 -3.8741726860089896e-03 -5.3373187575387502e-03
186 2.3598460527710324e-03 2.9248430360458099e-03 6.7466916161289670e-04
180 -2.5922508198591081e-03 -2.1198603689093123e-03 -4.7637056203815207e-04
206 -1.6444719126828388e-02 -1.8725318033135815e-02 1.6861343747254176e-02
205 -6.5994725428528394e-03 -1.3450426985137458e-03 2.0860977828772408e-03
203 -8.1274545718993188e-03 3.1339572852861515e-04 1.9737521645006931e-03
179 -9.7088920952372081e-04 6.4649822981134777e-03 -1.9596583872528669e-03
181 2.9860515684730993e-03 -4.1820693397911259e-03 -8.4204994517821583e-03
244 -1.0393847735789843e-03 1.1258099622177104e-02 -2.4340066199014940e-02
246 2.2807567763606120e-02 8.0649371239418875e-03 -9.0629199719759641e-03
168 1.8857898311300230e-03 1.3159130334708483e-02 -1.2093278634040777e-03
169 -3.1258912406231867e-02 -8.3724172899800487e-03 -1.6777117408502452e-03
167 -7.7322818363450060e-03 -2.1890533627493117e-02 1.9234806760296493e-03
166 1.2706859606113870e-03 4.1388246916958492e-03 3.2111976348779244e-03
163 1.9706611658215005e-03 -8.8466854987659643e-03 7.0347626225116065e-03
174 -3.5044298982306923e-04 -2.4935878432022772e-04 5.8102546182287537e-03
164 1.3653239423949176e-03 -1.5158689053359854e-02 -3.4769186646708430e-03
161 4.2682828333069174e-03 4.5460495317869278e-03 1.4264052912708663e-02
160 3.9060359120951316e-03 1.5711087341757425e-05 3.9565251545088864e-03
162 1.8571883373485844e-02 1.5378791112742235e-02 1.2799599500189092e-02
144 -3.6221023833660645e-03 -3.7519672148149498e-03 -1.1692742404771693e-03
14 -4.4502431537102134e-03 2.1010743004195543e-03 1.0335550426578129e-02
9 -1.5783294835321378e-03 3.4187774207463622e-03 -5.3717109583905189e-03
60 -1.1514110167573401e-03 1.2822628554464111e-03 -2.2499566766417609e-03
58 -1.9601884670509565e-02 4.2664087893290085e-04 4.2573002340375588e-03
55 6.6955488519988161e-03 -2.4698550029215414e-02 1.0432158729907699e-02
54 -3.7321336883613075e-03 -6.3294851155271392e-03 -1.4142767363510850e-03
62 5.4991411684606559e-03 -3.1416245036466743e-04 -9.8547602405385931e-03
57 4.6264091630929668e-03 -3.8396681018021479e-03 4.0513225727661310e-03
41 -8.2336134668427891e-03 -1.1942168210675409e-03 -3.8742237166147502e-03
10 -1.3962918082699568e-03 1.5460105066705113e-03 1.8733516378965636e-03
42 8.4018133961734562e-03 -4.0857647930516681e-03 1.0041306700110391e-03
45 -1.8319282404320123e-04 -2.1558935447248766e-03 6.6527143863900282e-03
56 1.9507906587950784e-02 -1.1933185583400363e-02 1.6272208044128367e-04
46 2.6601125281272690e-03 -1.8970464989284487e-02 -3.7119670000404833e-03
5 -2.0825018388734820e-03 -7.3628413692027267e-03 -3.2248427865166967e-03
1 -1.0417450154409989e-03 -2.8315242389836707e-03 1.2785759467383510e-03
59 1.7258103259656932e-02 1.7716235371720162e-02 -1.1222613314928478e-02
2 1.2049487290062227e-03 -5.4090296711363315e-03 3.8566331014285990e-03
44 7.0928295794271297e-03 -9.4334353070648809e-03 3.4288530393877564e-03
12 2.6609027476889183e-03 -1.3739922775909104e-03 3.8997808112950175e-03
1237 -8.8005622973673266e-03 -4.8976993112718088e-02 4.1081188310369762e-03
193 3.8190405826160284e-03 1.5775776000388358e-02 2.5779632547569182e-03
189 -2.8686669749813571e-03 1.1265280471992344e-02 1.1036955435743279e-02
191 -6.1105459680888957e-03 2.2900078505674631e-02 -8.5687854097393160e-03
190 -3.1576511693162512e-03 8.5971064623030491e-04 3.5387617994056294e-03
192 5.3656515567277472e-03 -1.0632605692396351e-03 -1.1783459373257052e-02
188 -9.2693142355284499e-03 -1.4101171357211197e-02 7.8281864613309899e-03
187 5.4479438341717961e-03 4.4126801274024467e-03 1.2020671515454598e-03
183 -1.8337773978209944e-03 -1.0059743745440584e-02 8.0712426998214883e-03
182 -6.2295267242695662e-03 1.7967881714737891e-03 -1.7707404643235130e-03
165 2.3598690928504939e-03 -1.8001823024236058e-02 -2.1943486964486393e-03
158 -7.7148593948518909e-03 3.4510635803747240e-02 -9.0230204933564023e-03
157 -1.9181856022012901e-03 2.9086393209855031e-03 2.9507045249439946e-04
152 2.2794159600109293e-02 3.5140805084158200e-03 1.6686789666348796e-02
159 6.2496664672816640e-03 -7.9937594032206665e-03 -1.4405007942890820e-02
154 -2.2961806896156429e-03 -1.2186815214067647e-02 -2.7376748982019694e-02
149 3.4160216569499046e-03 -2.4403396513154410e-03 1.2949488157189559e-02
150 4.7839500521692380e-03 -1.5893043293111898e-03 7.1400427836630347e-03
148 -1.6804677665897259e-03 2.7155648502186140e-03 4.7578777497883163e-03
151 9.3557506673277169e-03 -1.6266737477099030e-02 -1.0350344587333011e-02
145 -1.2595209203301674e-03 2.3354630882198735e-03 6.6560903273043788e-03
146 -4.3475371147901195e-03 -7.3016360111356001e-04 2.1780778143482581e-02
153 -6.4840839985749765e-04 5.7262811100662232e-03 -2.2517845003127103e-03
156 1.0446829468863373e-02 1.5902771538551456e-02 -7.1901729741270107e-03
155 1.8766910591902577e-02 -8.0989434475702490e-03 -2.7382597324702540e-03
3 1.5075168516367797e-03 5.5284883271214530e-03 -1.4736346304338676e-03
17 1.7208836898842166e-02 5.2480555396291180e-03 1.9854882143554684e-03
29 -2.2055269013856627e-02 1.6885744215401878e-02 -1.7757731801882704e-03
6 8.1191780524068435e-04 4.6770758582973916e-03 1.5694936370038439e-03
13 5.1019521859910688e-03 -2.1094547187450099e-03 2.5475877398389257e-02
18 5.6755124277736756e-03 1.8755006516972577e-02 2.4214278051588132e-02
28 6.1703076308795490e-03 2.1514491771695049e-03 2.8497114843220170e-03
36 -5.8468683750845058e-03 1.7229126433536395e-02 -2.2763986804445985e-03
40 1.5626784917979631e-02 1.1523729434201609e-02 -9.6145510334014073e-03
37 -6.1644557699404188e-03 -3.1810278848978663e-03 9.0102730663565100e-04
34 1.3234276291972154e-03 7.1271674253671280e-03 -3.7058432178563344e-03
39 -7.3869487947605611e-03 1.7178788558331183e-03 -1.7086910723246190e-03
32 -9.8756372574856626e-03 -1.6224603615088914e-03 -1.0789071193795165e-02
554 -6.0533985782619077e-03 -5.2762688614671881e-03 -6.3894901731268040e-03
488 -1.7622088363622444e-03 -8.4640094242356047e-03 1.5846892397899971e-03
490 -4.0064314660036432e-03 5.6969512348549879e-04 1.4246723289504455e-03
489 6.0819714137463996e-04 9.7685154946945490e-04 7.6967822593098255e-03
553 -2.8820897721270320e-03 1.4801983250387417e-02 -1.1739798769401214e-02
504 6.7132076911177035e-03 -5.1375242215568762e-03 -2.5388524245598377e-03
548 1.3673502043800493e-02 7.4105770964354471e-03 1.9507289702712965e-02
550 1.3071227134567273e-02 -3.2885758568136410e-03 1.0600878367610122e-02
483 8.1546358880506134e-04 -2.2189847630631433e-03 -2.3398776844512112e-03
544 1.0412780508778677e-02 -1.8734979361209044e-02 -3.6814649768426940e-05
547 2.0647328873815800e-02 -9.5211360708358766e-03 -4.4747862181101685e-03
555 4.4662026370969436e-03 -5.6255627943071406e-03 1.2051954210407570e-02
551 9.3897726078930582e-03 6.6186004678981843e-03 -9.6524990611906482e-03
552 -4.9692979733656677e-03 -2.7082681000560292e-03 -1.0665697052184157e-05
549 7.0453767189781200e-03 -5.3953518037446815e-03 -6.2575334876860218e-03
543 5.5171375207304866e-03 2.1836519827412165e-03 -1.6488023912690957e-03
546 2.3643936925234811e-03 1.3454001106834601e-03 -2.8473977266503577e-03
484 1.3673100630034524e-04 3.5842835878749347e-03 -6.5576546162626290e-03
487 -9.9102887930937111e-04 2.8276864494276902e-03 3.0138783910143050e-04
513 2.8749896826739587e-03 1.0338536616804714e-02 5.7047423283426687e-03
505 -4.6844063614147839e-03 -4.0241074952539002e-03 6.4932016167637682e-03
511 1.0100831470336103e-02 -1.1554802432932965e-02 -3.9672630012531334e-03
503 3.0317185645541960e-03 -8.1386276442210422e-04 9.6822565089029768e-04
508 -1.2284016599322685e-02 -5.3493986152472325e-03 1.4153941423086373e-02
506 -2.7628739460347387e-03 1.5283112151649764e-03 8.8199069945229629e-03
509 4.3611603839750481e-03 -6.1752590391957046e-03 -4.8362730825351570e-03
507 -1.4356933704587923e-02 1.9754487145728322e-03 -7.1180014697311157e-03
510 5.4009544991515546e-03 5.9465516589358031e-03 -6.2387231950818680e-03
515 5.5126688298235199e-03 -3.1401662638298033e-03 2.4663884705744244e-03
482 1.2289023905071969e-03 4.4620288693701839e-04 2.0333344794931153e-03
512 -4.5809326026454433e-03 1.7530152548050622e-03 -8.8960747661146345e-04
485 -1.8770968031483501e-03 1.1187235575515018e-03 -5.0580210703427709e-03
486 4.1135783903842819e-03 -2.4884873423365317e-03 2.4335715721925102e-03
419 2.1937406818626319e-03 -1.0550992743734262e-03 -7.0742544383511014e-03
481 4.2261322081737643e-03 -1.0659703373756000e-03 -7.0728097091431554e-04
480 -1.6979618974809468e-03 -1.0875324640802925e-02 2.2828987089478533e-03
420 -2.7608211735936777e-03 1.6799264480946896e-03 1.6901072352149747e-04
275 1.8972586787855744e-03 1.8935627259160407e-03 4.9519427355287204e-03
479 2.0397424193849303e-04 2.1899010176693666e-03 -2.3450153162661584e-03
421 -1.4032357219676168e-04 4.1475622089561279e-04 -2.8203345412662730e-03
397 2.6042187819869875e-03 1.1815050971675210e-02 1.6325965608844761e-02
392 5.8226380948117129e-03 -1.9949007792963401e-02 -1.7817197286485256e-02
391 -6.6044227769414938e-04 3.5561299642509745e-03 -7.6228024296662797e-03
394 -2.1159127249408504e-02 1.1207953204013724e-02 -3.1089819770784250e-02
428 4.3738212207791562e-03 -3.3057353457152951e-03 1.3499530001949667e-03
430 1.0710939450878060e-02 -1.7798973180787121e-03 8.7608321717295799e-03
395 -1.7848332341854054e-04 2.2688048712347385e-02 1.5264284267764364e-02
393 -1.7000060571154946e-03 -3.4347996174924514e-03 2.8084296595860514e-03
388 -1.9090631125814382e-03 -3.2279490967272880e-04 -8.2068252027137024e-04
396 3.2711777313859905e-03 2.4637421691472107e-03 4.5221751127082661e-03
412 -2.5613035783244122e-02 -4.6322558785848863e-03 -2.2931152154020286e-02
411 -2.0035320308161311e-02 8.2647550618335161e-03 9.9708825456646180e-03
405 8.7311442455479567e-03 -2.5715440321321541e-02 1.8012136453518242e-02
400 -4.0531706129055770e-03 1.7402227328384234e-03 1.6783208773521954e-04
401 4.7850886664147834e-03 3.9665595058210592e-03 8.1413346562146695e-03
407 -4.0056089331203951e-03 9.4219819496309098e-03 -6.0540976458897180e-03
403 3.0730801625286392e-03 1.1514177316154005e-03 -2.2822816905791608e-03
406 9.1076226614845719e-04 1.2643996426323497e-03 2.5978207942150664e-03
404 7.8042352001621062e-03 -1.3584072394907630e-02 1.3278307267016344e-02
409 3.9614354157400345e-03 -3.9936413030753661e-03 -4.5813595066505246e-03
410 5.6385134971568699e-03 -1.2935358257486719e-02 6.5402497224914483e-03
429 7.8972355265426782e-03 -1.1008901072988223e-02 -1.4577840631618585e-02
402 7.2749907398365606e-04 -8.9073744141576078e-04 -8.7503107293992310e-03
408 9.7286871550666589e-03 -9.6725147167518333e-03 -2.2829661091306925e-02
384 2.6590036414645569e-03 -3.5731829741441627e-03 1.5325536215370860e-03
427 -1.2614014405427940e-03 4.4408864566396230e-05 -5.9690105568105667e-03
423 -3.7906415302378154e-03 5.2836225682384641e-03 -7.8547361450278250e-04
424 2.6937497100628176e-03 3.2653414789866461e-03 -3.8416478268544938e-03
341 7.2103637737453976e-03 -2.7184781336221904e-03 -2.6723676589407729e-02
425 -9.9443561531324647e-03 -6.6623826976379089e-03 5.5102674712625335e-03
415 -3.4457556827462354e-03 -6.2495226220186711e-04 6.6231929968259256e-03
416 3.2550124002526633e-03 -1.6177812084951209e-03 8.1244083207272569e-03
418 -2.1389700753687898e-03 3.5137739414759076e-03 -3.3151219797408630e-04
422 -2.9869639436855321e-03 -3.3479841758799990e-03 6.9610653076498561e-04
460 -6.6328638447176304e-04 3.3637177122960694e-03 2.2894273031091490e-03
414 7.4697207847730391e-03 -3.4288216849733323e-03 6.8961390377983304e-03
413 -1.7838495587467091e-04 1.6578379783827484e-03 -2.4377816217937822e-03
417 -2.2546324055028322e-03 6.6275032594757255e-03 -5.9824243966072176e-03
327 -1.2532753188684692e-02 2.2344075814504573e-02 -1.8418444998801018e-03
329 -1.4293841355016433e-04 -1.3145438150615594e-02 1.0818369906544823e-02
38 -1.6563808807239452e-02 -1.2155846443225725e-03 1.0770539959816597e-03
386 3.5387620022642443e-03 -5.7159925665250973e-03 -2.3149786235581345e-03
390 -1.3874801036754926e-02 -2.6645615334326390e-03 2.8986679715858090e-04
385 3.4222526829282875e-03 -2.2159595527354871e-03 -3.9960065706662745e-03
389 -2.0537273441022397e-03 -2.0347200062903349e-02 1.0482938990222720e-02
381 -1.0558461271192336e-03 -8.1209492780182999e-03 -6.2265985245131845e-03
387 -6.3556430276488218e-03 1.7927732660615048e-03 -8.8911659445806701e-03
380 -3.7194837660280144e-03 2.6667614864201387e-03 6.9249996706456408e-03
382 2.1312366635515309e-03 -3.6670763641222376e-03 -7.5758264932973482e-03
379 1.5030017323335726e-03 1.8673328448499497e-03 4.9394888284550679e-04
383 1.2682847529918671e-05 3.2079046265775504e-03 -4.9344135317193182e-03
375 1.1696635397993552e-02 -4.0282825043255963e-03 -2.6637746377362373e-03
378 4.7302618766538202e-03 -5.3782031253819208e-03 -5.0505016207015949e-03
377 -3.1796917488786098e-03 2.2089907889331364e-03 3.7573404239959092e-03
316 3.7835402504876048e-03 -3.3579707237377215e-05 1.0132215175135289e-03
372 7.0010813431518630e-03 1.7844119143747468e-03 1.7731047919007683e-04
374 2.7938624179329002e-02 9.2651523086015441e-03 -1.2628385465088018e-03
376 -2.1012693662898190e-03 -8.7052199025622562e-04 3.5085014575337546e-03
317 -2.4500401281106155e-03 8.2341294292249071e-03 3.7013400899016669e-03
318 7.7128092001652240e-03 4.7769231194634044e-04 3.8472001457031434e-03
323 -2.0881804615404745e-02 -2.4843010623237773e-02 4.4398174586807535e-03
321 2.4811551593687440e-03 1.0557893735336167e-03 -2.1077354365562711e-03
371 1.4925367292279678e-02 8.4423720547937807e-03 2.1198461129054335e-02
368 -7.3455849407428348e-03 7.4423594421603781e-04 1.7463654197571555e-02
369 -3.1804654813748370e-04 7.5912907949090046e-03 -6.3780705591370617e-03
366 -2.0385376436096079e-03 -6.1085185078065497e-03 6.5440212701096869e-03
365 3.1939055177866967e-03 -9.4222493646083528e-03 6.3602057439511722e-03
370 2.7387302912835589e-03 9.6047260511861396e-03 -3.3355187465060562e-03
367 3.3956691300583461e-03 1.4689468649611056e-04 1.0823044046306223e-02
363 2.4482008315930303e-03 7.3330991606105770e-03 5.4832009147108536e-03
359 4.0685045426998396e-03 -4.7824126491280003e-03 -5.5339470389067667e-04
362 -5.7116578051281067e-03 -2.1009892135559032e-03 -6.6801433063082890e-04
355 -4.6401953935840418e-03 -3.7299695472857101e-02 -1.5187437123885359e-03
364 -2.5693143135302417e-02 -1.9527280503088044e-02 -2.6600223376018655e-03
358 -1.0809118972083533e-02 -6.5588565956218913e-03 3.8882182269851730e-03
356 2.5804449991798763e-03 3.9523116654690792e-03 6.2631209763269931e-04
354 -4.3608988814323917e-03 1.6296362649948451e-03 -2.1035526748355404e-04
360 3.0748991655507349e-03 -2.8901191518270757e-03 -1.3361213214756469e-03
361 -2.7173730886514331e-02 8.9047635149910910e-03 7.2990480467411958e-03
336 2.1039797407277992e-02 -9.9998078311395646e-03 -5.5498950587485911e-03
333 9.2985661732851682e-04 2.7778376277687402e-03 -5.5988889991172358e-03
334 -2.5732582212105622e-04 3.8618173469998911e-03 3.9378989426320420e-04
330 -8.9178811258821735e-03 2.6452892881065576e-03 -3.6222794138482529e-03
339 -1.2254505624731241e-02 -4.4562466201377385e-03 3.7285010245244221e-02
332 -2.3809403566883096e-02 -2.6065503295271074e-03 -2.0807228913870233e-02
337 -9.2007210917240112e-04 -1.3937690549439441e-03 1.5191251279583247e-04
338 -5.6160784439314246e-03 9.7100679320002350e-03 -1.0231850483935301e-03
331 2.8286826077122493e-02 -3.3611814689733940e-03 -1.5791763928855219e-02
328 -5.1027071305460789e-03 -5.4490867911389154e-03 8.0654022067919509e-03
325 -8.0628978462183847e-03 -2.6847178204795217e-03 1.7897547404484460e-03
335 -1.4289975375838237e-02 -7.4555671401713907e-03 -3.8073340909407220e-02
320 9.4048781811195041e-04 -4.9113773544245444e-04 -5.8338332720486838e-04
319 8.4216100655106385e-04 -2.5146197885247750e-03 2.5643540692672179e-03
350 2.6988369298692129e-03 -2.2599687278917822e-03 4.6176206278550807e-03
353 7.0520765180337383e-03 -1.3136895266525547e-02 -8.7030684905974477e-03
99 -8.6490045020662949e-03 -1.8891335667614969e-02 5.7513988589653264e-03
33 2.3191658819529681e-02 -4.2286286154935229e-04 -8.7525429528802418e-04
310 -7.3943344277850945e-05 2.7848462899180185e-03 1.5762940609091427e-03
311 8.7614820085404020e-03 5.5930711340261008e-03 2.4138493505864822e-03
312 3.6248361654038636e-03 -1.7391302404924950e-04 1.6796433523809419e-04
324 -9.7766418123845808e-05 5.6967648552881953e-03 3.2503345194367685e-03
313 -4.4514843624715545e-04 -4.0257639956926775e-03 -2.0517479580601725e-03
314 -6.5241520101095331e-03 2.9940146243134188e-03 -2.0357113015771470e-04
315 -3.5105950352601620e-03 -4.6769263402931258e-03 2.2262461286555904e-03
322 -4.6314979369603835e-03 4.1377670714217944e-03 2.8087234922247586e-02
280 -9.8618843412755534e-04 1.2983961350465437e-03 5.9362877060324358e-03
232 7.2807456397419850e-03 6.7651226236897328e-03 4.7099180634166526e-03
351 -6.4550778911658599e-03 6.8651723119384179e-03 9.6003864681452888e-04
352 2.4339659805415262e-03 4.3891122496238170e-03 -4.8580983103631960e-03
357 6.5948080783695667e-03 3.4044060582633074e-03 -4.3053692635485856e-03
349 1.6781139551230433e-02 4.4219638313387297e-03 -2.4092465528378904e-02
347 3.6405694184365673e-03 1.6407845905762424e-02 -1.5557250707320452e-02
346 -3.1724896136708951e-04 -4.1710517528303686e-03 -3.5936664717069922e-03
348 2.9621700629904515e-02 -2.3691998623303749e-03 -1.7224778481592588e-02
545 -3.2101314317968060e-03 3.4815054417176852e-03 5.2486755237976057e-04
326 -1.5386486662002886e-03 -5.5296095399881302e-03 1.7340687517049556e-02
426 1.4271085968680758e-02 -6.7534992807005085e-03 -1.1153402523092607e-02
458 4.7271588709153906e-03 1.0113009895321969e-02 4.3253469634808965e-03
270 8.1729944899800837e-03 -2.2039208850107095e-03 2.3386519029792887e-03
272 1.9439784387557408e-02 2.7136307182148212e-03 8.8908135994643822e-04
269 3.3768780035587222e-03 5.7397557530560741e-03 -4.4358856649382673e-03
271 -1.6049953814990171e-02 -2.6300759835046324e-02 -2.9760519048493881e-03
266 2.7834260364129832e-03 3.5297183674560615e-03 2.4492915704846514e-03
267 1.5568327030026892e-02 3.7691422883315918e-04 -1.1344097865046877e-02
264 -7.1265112615475127e-04 -6.2903060777556169e-03 4.0053309152320921e-04
274 4.3776115315511841e-03 -3.6356998734799360e-03 -1.8542599279003228e-03
31 -2.4542926632029126e-03 -1.0027543521543379e-04 4.8868188952427682e-03
263 -1.8479128688386906e-03 -8.0151205781157800e-04 -2.3752977702810739e-03
231 7.4066388956027978e-03 9.8123581526358052e-03 -1.9255262435327009e-02
230 -5.5153940161632915e-04 2.5759247076101274e-03 -3.3885365533281092e-03
227 3.0620696869771841e-03 5.2009926615254759e-04 -3.5058965393559407e-03
273 2.1987947231859547e-03 -3.8844782465923911e-04 6.1980150568917230e-04
220 9.6375568363419352e-03 9.1473132165283653e-03 7.1348639633125280e-04
249 -4.0280362103341282e-03 1.2035911378536445e-02 -8.7464230141227218e-03
224 -3.5551766917699674e-03 -9.4408287492510224e-03 -2.5913339820515732e-02
218 4.3116547595013913e-03 -2.1077201801889588e-03 6.8409554354671607e-03
217 -1.4833555284808708e-03 -5.8445649316860382e-03 -7.6545455929092386e-03
216 -5.3324559259503839e-03 4.3106273440799772e-03 -6.8230806101915575e-03
215 -2.4806274074355939e-03 -7.6779330332808907e-03 4.0095445677461516e-03
210 -1.0617419698719861e-04 -5.9052162164582268e-03 1.6219711200438423e-03
212 -3.1453654581542817e-03 -7.7348647261024960e-03 3.3719336259473323e-03
222 -6.4715467622753643e-03 -5.3882188066534933e-03 9.0683041985671429e-03
221 -2.0437171359271107e-03 -1.1689541006724966e-03 -1.0070701344886736e-03
226 -1.3611418677705881e-05 8.8295071723189546e-03 2.4136019510579750e-03
225 -1.6680971495904857e-03 8.9003806493373385e-03 -1.6542411166746032e-03
214 -1.1323753306341942e-03 -9.0650162387238883e-03 -1.5562497649729799e-03
213 5.1447968964210349e-04 2.6058691673024035e-03 -4.6119050753459043e-03
238 -1.3129150278219535e-02 9.8489496880958490e-04 -1.3374326365849678e-02
228 -1.4495330772952753e-02 -7.2122765056530673e-03 1.0352610390012252e-03
236 -5.3020851312190692e-03 3.3157198736146203e-04 -1.1167841441482649e-02
237 1.7348196281124688e-03 4.6870218608903577e-03 -1.5073083041268205e-04
240 2.9820890143586560e-03 -3.9954845781061173e-03 5.7363369870934789e-03
223 1.2437496299361016e-02 1.1058104660525567e-02 -5.5436542216948095e-03
209 7.8266102048371914e-04 -1.6618017949281568e-03 2.3987640528155014e-03
219 1.5777990990819008e-03 -1.3261137770018475e-02 3.2720986123866508e-02
234 -1.6444155746429591e-03 4.7488797452291550e-04 -4.0640088946563291e-03
242 2.0090505331346872e-02 7.3539184919835304e-03 1.3541325102438102e-03
235 -6.4030825586280764e-04 -6.3541667225255078e-03 -2.7324636485460429e-03
126 -8.2011686820762843e-03 7.8348645606034321e-03 -8.8287595364082688e-03
131 4.5349532311434138e-04 -3.1848455227337320e-04 -1.4732360078844524e-03
306 -1.0528810253895566e-03 -1.9220280209875677e-03 -3.1539650989780401e-03
303 -5.9577466099034982e-03 -2.9033759000640980e-03 1.7658894909600559e-03
304 1.2943801764268743e-03 -1.6477821683781247e-02 1.2972960616375295e-02
97 4.8276314074038986e-03 -2.1808529739193649e-03 3.0919602295073189e-03
305 5.7990109008539690e-03 -8.6404219243486902e-03 -2.8624563888057747e-03
308 1.5614091163560530e-02 -1.0395152208684364e-02 -1.0692085157537556e-02
132 -2.3598026367272384e-02 -4.3362596304282602e-02 1.1209570571601110e-02
255 -2.3497730066074675e-03 1.1315290082953594e-03 7.2694175847278913e-03
268 -2.9983456665548094e-02 4.0059378400782658e-03 -2.3058715570185434e-02
261 1.7093743767269451e-02 -5.1083492454440252e-03 -1.2110543443662945e-02
309 -1.2698860887272606e-03 -9.4824435860035739e-03 -9.2631223677119481e-03
256 5.7706212902419157e-03 -3.5482062883765634e-03 -3.0465174280065108e-03
265 -4.2471471833850606e-04 5.1555383063773700e-03 4.1821035715488616e-03
260 5.1569147508013840e-04 -1.1343816161315113e-03 3.4885112138619517e-03
262 -9.1827822342812337e-03 -3.4815634759575590e-03 -4.8413330710252696e-03
257 1.7595684261978807e-02 -2.1831976094749721e-02 2.0310353982766417e-02
35 7.3775350442465241e-03 3.0479494884335288e-02 2.8611971875607471e-03
211 -3.1386927418512334e-03 -6.6800577949347279e-03 4.5993133967809751e-03
247 1.9383135056656176e-03 -3.3035309207375845e-03 -2.0354510621537999e-04
535 -5.2449875187881613e-03 7.5695014494833995e-03 2.6360699790436839e-02
259 8.5741235487975676e-03 8.3792898949958932e-03 9.7466436960563663e-03
252 1.5613511574968117e-03 -1.3346675546278126e-02 -1.0496284733003671e-02
251 6.7706379101993468e-03 -8.3832815731417975e-04 -5.0990135079269526e-03
253 7.7879872452560634e-03 -1.0388261146485563e-04 2.3948943072699884e-03
254 2.3154149231547832e-02 -2.1635415656539061e-02 1.4599013513080083e-03
248 1.0023736765009358e-04 5.8441213752844137e-03 -5.0625892757378780e-03
250 -1.3730813297860717e-03 5.8562281377837538e-03 -7.4118444810387955e-03
178 5.3630416059836754e-03 -5.0705936334861064e-03 -3.1058081662756181e-03
207 1.9465737243798812e-03 -3.0202257717022317e-03 -2.5657332327566585e-04
175 1.4777958983370619e-03 2.6000956492019172e-03 -2.5171696222919164e-03
208 -3.6076595710542057e-03 -2.3498178179432692e-03 -2.9160199046043112e-04
176 -1.0365018872531175e-03 -8.5227120673515653e-03 1.5205303338378631e-03
177 -5.7695941314931821e-03 9.5849271084361707e-04 -6.9738737360192245e-04
173 9.4094613253025165e-04 2.1191850813638293e-03 -1.5547479740942108e-04
117 4.1154014886880573e-03 1.0644029519097939e-02 -1.0919006509822556e-02
112 7.6292303197326126e-04 1.3026678906339918e-02 -8.1760671979696133e-03
172 3.4254858057299296e-03 4.4108360697604450e-04 2.2558409465686293e-03
111 8.2122717831198174e-03 1.2032240085751164e-03 -3.5282412528656513e-03
171 -7.0997400981242381e-03 -1.6772011903444179e-03 -2.1912883797483083e-03
170 -3.7788199196119607e-04 -2.1625498383547859e-03 -7.5530849800862989e-04
125 1.8883007397530770e-03 -6.4213767834521334e-03 9.8920784665842733e-03
124 -4.8583013491609629e-03 3.6170279926385153e-03 -5.5385466878931245e-03
115 -3.1645044084751901e-03 4.4511727545762493e-03 2.8557205507009440e-03
110 -9.1134692717496988e-04 2.0991016350834970e-03 -7.3874553695610151e-04
114 4.4321535031071656e-03 -2.0629704031811637e-03 -4.5364038433091305e-03
109 -7.0603228093837084e-03 -9.0976012007908222e-04 -5.8301873782995179e-04
116 -6.5492863518141599e-03 7.7060230946738913e-03 5.9666067890565824e-03
106 -6.2742847680589912e-03 -7.8532765095864921e-03 2.4205523366869156e-03
107 -5.0626952975729106e-03 2.8770501337633159e-03 1.6129654884748563e-03
118 6.7947065021398143e-03 -2.1403038358424860e-03 -2.6353425989515096e-03
122 8.9861606855550693e-03 4.1816285867426351e-03 2.3565329326136596e-03
119 -6.8950484304176754e-04 2.7228122871187843e-03 2.0055071083297247e-03
121 2.5378575257886974e-03 1.9804789430506526e-02 9.0728040256759495e-03
120 -4.1056365175197382e-03 2.2532855326223698e-02 -6.6714270902182042e-03
113 4.8842285366861920e-03 -3.5994986234238877e-04 4.5779458647272073e-04
105 8.6614782924464924e-04 3.8974666984976725e-03 1.5401308997216494e-03
108 -3.8147932366357031e-03 5.4233494657559417e-03 3.9936887020234372e-03
104 -1.4715266780531081e-03 6.3214009379263299e-03 -2.6296867918449048e-04
67 2.5150788491697701e-03 -1.4757888297566881e-03 -2.8326088767447982e-03
74 4.7169800421785341e-03 8.4516514481217490e-03 -3.4464200093612166e-03
8 -4.2954089297350468e-05 -2.2083683980469323e-03 2.8797610087389395e-03
43 2.0181490058237325e-02 5.8620601277129180e-03 8.4987536697778213e-03
147 -1.8278038845098144e-02 2.2307603296921826e-02 -1.3518401080138510e-02
75 2.2178943706639915e-03 2.0885631083414464e-03 -2.0292491614804149e-03
76 2.7003743251426565e-03 2.3683316961433522e-03 1.6917930092469299e-03
93 2.3728702973203220e-02 1.0043347063225702e-02 4.4039986778178792e-03
96 8.3300087434383537e-04 -2.3680457927255710e-03 -4.6706067970322743e-03
77 5.9172835791638746e-03 -1.2404138781355136e-03 -6.2430879502821399e-03
72 1.0294790160800879e-02 -1.4876114941499337e-03 8.1919986845596527e-03
73 2.4085551335919094e-03 1.3581948083500093e-04 -7.0153812090456213e-03
71 2.5988389381129975e-03 -5.5387061317845850e-03 2.0420176156362622e-03
78 1.0679193045466477e-03 -6.1123273290423974e-03 -1.7806887589146881e-03
7 -1.4223716290232920e-03 1.6145561939282006e-03 7.9366346892660606e-03
69 -2.8836988134983395e-04 -9.5799897455930614e-04 5.2833774018701402e-03
68 2.1709051271062677e-03 -3.8764025747533314e-03 9.0533186160111608e-04
70 4.3309110238829406e-05 -3.1113066895235766e-03 7.3345772503615359e-04
11 -4.3291056405568738e-03 -2.5291793244979683e-03 4.1307537711096978e-03
4 -4.3464955958591915e-03 -5.9759797696328568e-03 -1.7470410509672174e-03
16 -1.9521196327325684e-03 -5.0126155449176455e-03 1.6946578537667930e-03
19 3.1107558360275000e-03 -2.6646266234928080e-03 -1.9147636707396751e-03
30 6.9849354838349724e-03 4.2733265193171787e-03 1.0710564794338281e-02
26 3.0760600099244646e-02 1.1154757088832137e-02 1.7160586786579751e-02
27 6.0373693215501380e-03 3.4014775476337959e-02 1.7079949525713713e-04
25 -7.9946213416041568e-03 -1.0439208188515847e-03 -6.8972308335982172e-03
24 -7.0558303407771087e-03 -4.2356527052974683e-03 -2.3408152049184026e-03
20 7.5209468531302840e-03 -1.2295262472309231e-03 9.4320540601138311e-03
21 -6.7728900623809868e-03 1.8691378370239277e-03 -6.3541434947763306e-03
23 -6.7656722301402553e-04 -1.0978396582071922e-04 -1.3854638138449706e-02
15 -4.5519787790928128e-03 -9.2323554757216420e-03 4.1718582000640602e-04
22 -9.0675926197626468e-03 3.0177186213183062e-03 -3.9433439358481049e-03
79 5.3311343843319217e-03 5.9072055145269076e-03 -6.8749766002628191e-03
80 4.3069077815268076e-04 -4.7940255766231047e-03 -1.1327380896311924e-02
87 3.5027102274788370e-03 4.9526397552813271e-03 4.6200657830004939e-03
84 8.7227006120260808e-03 -9.6686031312568645e-04 2.8007824040719716e-03
83 1.6120789355818184e-02 5.4675979506899420e-03 9.4288472729891406e-03
81 -5.7546264142108892e-03 -1.6440876095756823e-02 -5.8068431195235038e-03
89 7.4442586980679208e-03 4.7610454258904117e-03 2.3648334655900747e-02
95 2.6233148699163007e-02 2.6240860947983356e-02 4.4791095864237188e-03
86 -1.5337649608771632e-02 -1.1678839734362614e-02 6.5221246303848624e-04
82 2.9810388597765539e-03 -5.3886577246795983e-03 -9.2625348531090064e-03
92 -5.5944268909722508e-04 -7.1635610875695581e-03 -6.0213592275752958e-03
91 -2.8811687841582001e-03 -2.6273607457649533e-03 -7.5801749385532502e-03
88 -3.7160381269005976e-02 1.0443402099334007e-02 1.5061953580893551e-02
90 -1.5472751561062578e-03 -4.1695270886145984e-03 -2.7383402253174736e-03
94 1.3022136111496443e-03 -2.0533570523929312e-03 -7.4403409964665856e-03
85 1.2468388332447811e-02 -2.3173848674114848e-02 1.1219862936061734e-02
343 3.4696975326312428e-03 -2.7250361334811950e-03 3.8293524398280748e-03
461 3.7873762458120554e-02 -1.0233345902250054e-02 1.2132564716549440e-02
459 2.8526238432368305e-03 1.1842994684556096e-03 2.8717793074153992e-03
517 -6.1362783557629614e-04 3.5914162138875306e-03 7.9157390002779094e-03
345 1.1130034907576780e-03 -1.8578819505812607e-02 1.0322112690847947e-03
340 -1.2037427148291855e-03 -5.1977506937931758e-03 9.0619465752907521e-03
139 -1.8389476583045222e-02 8.8720897769940833e-03 8.2373167866410333e-03
98 -9.7166458141235250e-03 3.0937954400112083e-03 -1.0056379723188999e-02
307 1.2866408244531953e-02 -2.0957625191027123e-03 6.5306092416168608e-03
528 1.3502537493393399e-02 7.1690055079749358e-04 -2.2847859307362262e-02
583 -6.5017648247438081e-03 -2.0926573744883218e-03 -3.5755332149294758e-03
258 2.2407215200690632e-02 -7.9773621818763005e-03 -6.3945263673759033e-03
541 1.6088768594907651e-02 -2.8401341983831712e-03 -6.1883228347268098e-03
530 4.2160552127257127e-03 -3.7750194959702165e-04 5.0933310367434108e-03
531 9.1701878062857135e-04 -5.5229129686150237e-03 4.6281873084241792e-03
538 -8.8998842998330788e-03 6.2464322193840870e-03 -9.9525548906440942e-04
536 -3.7349055211784378e-03 -1.5266174376714079e-03 -6.5545859541807951e-03
539 -1.3970293407578988e-03 -8.2134672334270679e-03 1.1654143929554653e-03
542 8.7975263867049840e-03 2.5291816569134526e-02 8.1523174325846774e-03
540 1.2594548421326249e-02 -1.0027024307622943e-02 1.7692467759828800e-02
537 -1.6077590307384470e-03 -1.3928211967211515e-02 -2.7896093755356170e-02
533 2.2215098506576524e-03 1.4718755506246841e-02 4.0601881521713769e-02
568 -6.0779149668781412e-03 -5.0795709350511557e-03 1.4822846062174167e-02
534 8.1429807130488224e-03 -4.5415464906275972e-03 -1.7642347411481367e-04
465 -1.0813823134994374e-02 1.2139937697394755e-02 -3.4950432550906857e-03
453 4.8981130085929301e-03 -3.5555590712752503e-03 -6.1644590139369919e-03
522 1.0006774760929853e-02 7.7971126132646472e-05 3.8554226053309861e-03
523 -1.9683111410754818e-04 3.6782567256588550e-03 4.8269617988466089e-03
558 -8.9982718274161152e-04 -1.9912378048652556e-02 5.3914545380175623e-03
529 -6.1847439446905701e-03 1.4949576891314724e-02 -7.6079066068282465e-04
524 -1.0867795895246941e-04 6.0490728145208734e-04 -1.0373771642358660e-02
527 -8.5976047623433915e-03 4.4902567984746195e-03 -2.0804907687711829e-03
526 -8.1981764317094977e-03 -4.1154547750330093e-03 4.3534297117518218e-04
525 2.6150249919486656e-03 -2.9106439869560044e-03 -4.5602398342693600e-03
556 8.0943998342911817e-03 8.2815852585718414e-04 3.3196764811879282e-03
557 -5.1751136352144135e-03 -2.0334681763716418e-03 5.1404811315045248e-03
559 -9.0549380196105675e-04 -1.7302922313264232e-02 -2.2126151822195694e-02
519 -3.4720174301500579e-03 -9.0157889881854172e-04 5.8435797356111408e-04
521 -7.1404940996738385e-04 5.4193269373448809e-03 3.3969181294068065e-03
520 -9.6590433366430751e-04 -6.6986479090309589e-04 -2.2011934499216799e-03
1222 4.4710071661096754e-03 -1.4319530262174814e-02 -4.0435366472347023e-02
516 3.5098191347089605e-03 -1.6935895335925188e-03 8.8930659822907118e-04
301 -2.2595845212519841e-03 7.2538402685684679e-03 -4.1684322718388966e-03
129 1.7565976912771758e-03 -3.5516223555096278e-03 3.0934472483961032e-02
128 -1.2950122084832693e-02 1.3797947504051052e-02 -1.2577264748261815e-02
276 -2.6309516893728013e-03 1.4039653615083307e-03 -8.3050131865804004e-04
1216 -2.1998766925741400e-02 3.0578289102531370e-02 1.3263531000861707e-02
570 1.6651463732864951e-02 -8.6732127561324774e-03 -2.4405119100083219e-02
561 1.5669777003167233e-02 1.5000851275350773e-03 6.9213746354236253e-03
573 4.2593674226221543e-03 -3.3603010117614669e-05 2.7726043128739964e-03
572 -3.7749034650166498e-03 -1.0290382168765639e-02 -3.1028243558733439e-03
576 1.7329589839885109e-02 2.7646383142137947e-02 7.1663918394675105e-03
569 8.4651808997583868e-03 2.1294287419470954e-03 -2.0804870333698887e-03
575 -2.9795705117909915e-03 9.1366747141594391e-03 1.2393718401326555e-03
574 -5.9864177552783737e-03 -8.7862649452952971e-03 -6.5129572654051287e-05
571 -6.9959909661259940e-03 -1.1447263732690930e-02 -5.0472821258779150e-03
560 -7.5086774644398287e-03 3.4978330494759725e-03 1.0675565037613732e-03
563 1.4039516505934958e-03 1.7316006324057807e-02 2.2368189698647963e-03
564 1.8208575893354680e-03 -6.8456733522149300e-03 3.7982815215905855e-03
562 2.3296551737747766e-03 -2.0183173525288676e-03 -3.5645453134941227e-03
473 -1.5239744683337282e-02 -1.1500615172768491e-02 -4.1164216926048427e-03
467 -8.4465232812766904e-03 -1.2703274733242051e-02 -5.3154201773995139e-03
477 -1.8139910439452310e-03 9.0517865217851386e-03 6.9834747843221063e-03
476 -1.8580596238112906e-02 3.1239057072459078e-02 1.0174524158471818e-02
474 -4.9897355814963211e-03 -7.8715425042526438e-05 -4.1051486091476241e-03
472 -6.2416981607839976e-03 1.9951129825048724e-03 -7.3270432151012921e-04
567 -1.6837154889092192e-02 9.0151007654868248e-03 -7.3253145711402274e-03
469 -7.8758776179990529e-03 7.1442434521351650e-03 -7.7110564934149244e-03
566 -2.1667148336843994e-02 -2.9557860540251539e-03 2.2259775972087840e-02
475 1.7856944052789543e-03 2.1010910307587855e-03 2.1294244957116358e-03
466 -6.0216977630809859e-03 -2.8615854162551187e-03 1.5747283683798204e-03
478 1.4141438142435576e-02 1.3103439340360222e-03 1.8750492255676960e-03
457 -5.8151327407072637e-04 4.1794289184354395e-03 3.7047802285387625e-03
1212 -1.2006555953651057e-04 3.8635397288306257e-03 -5.9647531433476416e-03
102 6.9628696181387407e-03 7.2932253518854704e-04 -3.1319094020153151e-03
302 -7.4696700382615574e-03 -2.6736328238788462e-03 3.6582554961689098e-03
298 3.3762567764173794e-02 -1.9387424595843012e-03 1.6031891661988353e-02
468 -2.2896567029943408e-02 4.3443599885148662e-02 1.4612049739881724e-02
464 5.9414767528140726e-03 -1.2465610272920693e-02 2.1490707874445521e-02
279 1.0677699464138664e-03 2.9065897478832052e-03 -4.0918749092465470e-04
462 6.5042682541751676e-03 6.0908393563372147e-03 -4.6361939762099694e-05
300 1.6889499469638987e-03 6.9679065075501300e-04 7.1497912207610110e-03
565 -6.3233386832930831e-03 7.6093764052810316e-04 2.8808432541743553e-03
101 -2.6571989247374949e-03 5.2634030025214464e-03 -9.5583774139625717e-04
1215 -1.2967672850143818e-03 1.9185444711610153e-03 -4.3967244201851786e-03
100 1.2868372243211646e-03 3.2824679599852244e-03 -2.6026594669005944e-03
127 5.3035141278008086e-03 -1.2390301452895375e-04 2.1823784062457543e-04
287 -5.8731538440437801e-03 -4.3498230015137718e-03 -1.8120545612698897e-02
455 -4.1672721057082390e-02 -2.5531937816905955e-03 -2.3042059248029580e-02
295 5.3573430544384005e-03 2.5181475536126432e-03 -6.0959914594941730e-03
282 1.3347870437969288e-03 -5.6738945990234850e-03 -1.1025805101888865e-03
283 -1.9686005535321008e-03 -1.3747565760429512e-03 9.3655626093796303e-04
292 -3.9786697612656076e-03 -8.5721722462559196e-04 -3.8893803402972080e-03
285 5.3604683196778781e-03 9.6638234455472972e-03 -3.0529398669845225e-03
284 2.4220325228851256e-03 -1.9476715577575465e-03 3.2668253353189975e-03
277 -4.8667671665465799e-04 2.2210658338370407e-04 2.6322607284932090e-04
1218 9.6209404019582181e-03 1.7394647571812426e-03 2.4035971149375650e-03
281 -3.4987068841795357e-04 1.7158067673579747e-03 7.3744196636507621e-03
296 -1.3627554599056804e-03 -2.1804261288101770e-03 4.0876412154859636e-03
289 -1.6641421440369657e-03 -2.9259611504025392e-02 7.4388185285122988e-03
297 1.5835146879417594e-03 -2.8910330889069104e-03 3.5770528484968733e-03
294 -1.1609885595094415e-02 -6.5970534849140866e-03 1.2566442030653855e-02
293 -3.2371394711142934e-03 2.2293108993925231e-03 -1.0749194351187545e-03
290 -3.3913271048516130e-03 4.6491687343799331e-03 -6.1800788601111094e-03
288 -4.5050043437998653e-03 1.7530464498050531e-03 -6.0542180373521692e-03
291 2.1089495255589594e-03 -7.1195431312491052e-03 3.2145671924525297e-02
299 9.9010173494833292e-03 -4.0955662291916346e-03 -1.1542930102163935e-02
1209 2.5286624111186921e-03 4.1737093181530693e-03 6.9609415413219482e-03
140 7.8355642586886206e-03 -1.2783416902743768e-03 -5.4215196264461056e-03
141 7.1813015125927115e-03 1.1032327216054466e-02 -5.7828191083862690e-04
143 -2.9397460981017427e-02 5.0326853190743783e-03 1.9142123028485377e-03
138 -1.1408465862317202e-02 -1.1034074665191727e-03 4.0944100258073247e-03
142 -1.0735621981638849e-02 2.7906573241910791e-03 4.2358209064532314e-03
136 -9.6638822881835759e-04 -3.7167368180027562e-04 1.1105036345718082e-03
137 2.3386061748739881e-03 -4.7173225854447781e-03 -1.5228186686600557e-03
130 7.9633662630563297e-03 2.0138771435045111e-03 8.8333045316369551e-03
342 -2.6696350114705541e-02 5.3669289132279407e-04 -5.5618311199330675e-03
134 1.3387445213833729e-03 -4.1256664263289802e-04 6.2479075341224209e-05
463 2.5804873964435024e-03 -5.1055058360757943e-03 -7.7383900833415103e-03
344 -1.7749118204835934e-02 -6.2590707781299895e-03 9.9897985336467095e-03
286 2.9785443455233930e-03 2.5303942393265838e-03 -4.1575444054723612e-04
1219 1.9071074060823000e-02 1.8994841949077329e-03 -2.2413028694882039e-02
1229 -3.6390109884036300e-03 4.8174948382023438e-03 1.0217008232149979e-02
1221 -2.8747160180458398e-03 -1.1265515340512606e-02 1.3977525926770701e-02
456 2.4952732982739621e-03 -1.9964379972895518e-02 -5.1136460610204503e-03
1204 -5.9136915469372789e-04 -2.1648448902672392e-03 6.9425081053760959e-03
454 -5.5911794670240531e-03 -1.7466178795009603e-03 -9.6995418547653027e-04
1208 4.2618104885573330e-03 -3.0431970640825579e-03 -5.5036302115121674e-04
1223 7.1869329318297740e-03 4.6689623817310023e-03 -1.2930783540505998e-03
278 1.3650021790391341e-03 -4.3573348426149494e-04 -6.9000502899432381e-04
103 9.4285433517310724e-03 1.1779178573107268e-02 -1.4864582456361785e-02
1211 2.1345176751435910e-03 1.9633735855294019e-03 -4.0883585165448913e-03
658 -1.4109276865570685e-02 -3.3152862609037038e-03 3.9870991724925186e-03
657 -6.3026298367305769e-03 1.9349595530038914e-03 -5.4312164884359954e-04
656 -1.6830936509501810e-02 1.1001065351106173e-02 -1.9381132408149360e-02
655 -9.2505794925878265e-03 3.0539006204584954e-03 4.2835457639819651e-03
653 2.9104517036161481e-03 6.9870543738961791e-03 1.5625556214313046e-03
652 -4.6069564953720435e-03 2.0262014337422145e-03 -5.0632008317812154e-03
654 -2.8242189087301962e-02 2.9257624901462692e-02 8.9556933661488133e-03
651 -1.4788054096280447e-03 -3.8208416628755220e-03 -8.7602493266438484e-04
650 1.0356850422329601e-02 -4.7045651983145115e-03 -5.4206781087068273e-03
649 2.9877981030178584e-03 -6.8354494172336759e-03 1.9346496697658807e-03
601 1.4504946450153254e-02 -7.4105591535817104e-03 4.7269550889361238e-03
785 -1.2231580505227388e-03 1.8900165717080385e-02 4.7401750210838587e-03
679 8.7901904600638757e-03 -8.7170130739826733e-03 -1.5875646770657006e-04
623 2.9994762120526676e-04 1.6616883743200230e-03 -1.0744018514713600e-03
619 -2.5819161515117633e-03 5.9289350704292559e-04 -5.8038251089038778e-04
628 7.5734433282141785e-04 -4.5015805963289071e-03 4.6189437232418617e-03
659 -4.3255666871930380e-03 4.1661096341370054e-03 3.9818737828564016e-03
661 7.9792182573600878e-03 -2.4855058699890090e-02 2.2325148285329112e-04
660 -6.2430429371380051e-03 -7.4674684548436010e-04 -3.0201528632483486e-03
673 -1.6040986541205084e-03 -2.0243715261454357e-02 5.0411969143866635e-02
585 -2.4915295613835960e-03 -2.0900219786500820e-03 1.0982681034587781e-03
622 -4.8786395317429046e-03 -3.4055543900705990e-03 2.8053069075454026e-03
582 -2.4707031832949282e-03 4.7633851154680884e-03 -4.7402559980394068e-03
584 -1.8966142758738485e-03 -2.4331071676320554e-05 -3.6989671726934230e-03
586 -6.0160966853303206e-03 -4.8830758552180931e-03 1.2262989884847613e-03
587 -2.1830812508363295e-03 -1.3089227426823988e-03 1.8534693449084494e-03
588 -6.1181294304520637e-04 -2.8093902750589458e-03 1.3765594374384117e-03
589 -1.1846623498027075e-02 7.8443275422969919e-03 2.4674134549515611e-03
620 -4.1625559044104910e-03 -5.1977838356717211e-03 -7.5503374922034315e-03
624 9.6044829829224445e-04 2.9616449396381358e-03 5.4551736340846214e-03
621 -5.1293326424505122e-04 -3.1595517964314243e-03 1.3963629411361015e-04
633 -3.1881549453282388e-03 -3.2510975269664580e-03 4.7583331943882945e-03
590 -3.7195678994024679e-03 -1.7038403218803855e-03 -2.0506978698586194e-03
631 -1.1906160545895897e-02 -2.0578275496426525e-02 -8.9201919823419622e-03
605 6.1185809824615576e-03 1.0487379730728252e-02 1.0633762013870687e-02
604 -1.3754035848884207e-02 1.1725964831898054e-02 -4.9546174891796080e-03
593 -6.8442022697701114e-03 -1.7156065556425404e-03 5.6829251023852948e-03
600 5.3321281327747428e-03 9.9612460898272880e-03 9.1603113882054010e-03
603 -7.1417753942106576e-03 -4.3583643297706552e-03 -2.3124207054669270e-02
608 9.6974703683652720e-03 2.8396299165811393e-03 9.3399658346048318e-03
599 1.9113187430419322e-03 -3.4474471021754424e-04 -4.8273249686144161e-03
602 -5.4564562136223014e-03 -1.2927229909866519e-02 -8.0028673547723993e-03
595 4.9860244202812104e-03 -4.2626534619699492e-03 -7.5858109806245409e-03
594 -1.5243908787268001e-03 2.8496720103771984e-03 -4.5536134400894429e-03
596 -8.6884536276151531e-03 -4.0312587355195257e-03 -1.0393138491017750e-02
592 -6.0421393829479079e-03 2.6888806697028768e-03 -4.8209819990631423e-03
591 -1.8803090845779735e-04 2.6979396216791495e-03 -5.9223406091060511e-03
607 -2.6082580394274361e-04 1.6290959821560255e-03 1.1867491831632237e-03
597 -1.1804873765433016e-03 3.5214775805629292e-03 -3.5938554957859808e-03
606 -9.7118438244987346e-04 4.3061001166179516e-03 4.2313850227399110e-04
598 2.9357654337593209e-03 1.3264268898554971e-03 -1.1020323247727531e-02
684 -6.3403064284665656e-03 -5.6535206971073540e-03 3.6165485466696373e-03
683 2.9412092862436479e-03 -2.2142005480371776e-03 -8.8756533974174347e-03
681 -6.2809581682880984e-04 1.4702606850766160e-03 7.6917582642973227e-03
682 -7.0619295041901660e-03 6.3963917849566628e-04 6.4404353512558668e-03
677 -9.8447883243257782e-03 1.9387526311231935e-02 -9.4062495488519918e-03
675 2.9228130807996016e-03 6.2461235687793978e-03 2.0154800165739376e-03
678 3.7500117068373640e-03 -4.4458387963741984e-05 -6.0479437362493558e-03
670 1.7216086847078170e-02 1.4433263757843571e-02 -9.7407074957236248e-03
664 -1.6639449318853826e-02 8.8878730647289038e-03 -4.7886923454702529e-03
669 -1.9588928568095320e-03 -8.1902424985407004e-03 -1.9947641731528000e-02
663 -6.1319355158251194e-03 -2.3528388432766272e-03 -5.2722067492252172e-03
676 -3.4429188139678595e-02 1.4056476280226842e-02 4.0004785028492293e-03
668 3.3197531408577074e-03 -1.2594308231970939e-02 1.7264041933737584e-03
665 2.6703185353206629e-03 -5.0660998353901920e-03 2.1054095671520076e-03
671 8.6001755521997597e-03 -1.5685863168269868e-02 2.1181745024082049e-03
581 -1.5332222844132274e-02 4.6377489911701439e-03 -3.5752622003836516e-03
578 1.2252997992114189e-02 -2.7139014872280820e-03 -4.6593206882563102e-03
580 9.3502807023147644e-03 6.6692947520848520e-03 7.6735196828204757e-03
577 -8.9687559897037731e-04 4.5258722189601948e-03 -2.3168371679264553e-03
579 -5.1744516862407006e-03 -1.5252268161825067e-02 6.2297902340524760e-03
648 -6.4861533117031743e-03 -1.9936156055720800e-02 -3.2152006319793376e-02
646 -5.3869711624083315e-03 -6.5742996193188718e-03 2.6753621888372906e-03
638 -3.0347397577821432e-04 1.5365875897036239e-03 -1.1033721914358871e-02
645 2.0593254042001158e-02 3.2979985278196104e-03 -2.2381510683741283e-02
637 -1.1779471339464864e-03 3.1182811390557848e-03 7.0908179746499121e-03
642 -6.4425489661313921e-03 6.7317261405833084e-03 2.8613792239737010e-03
643 -1.1124207444308764e-02 -6.7733417290641853e-03 8.6628629412677759e-03
644 -1.2639123541949024e-02 1.2282469468940580e-02 -4.2814475104526991e-03
614 -7.2194703994467434e-03 8.4824829353837804e-03 -1.4556951579297339e-03
720 -1.1990530699599638e-02 1.2319927044503735e-02 -1.8327430018660559e-03
616 -2.0325306812344509e-02 8.1257586610998989e-04 -3.6630064786951584e-02
613 4.6381814851970803e-03 -2.5100600292270160e-02 -4.0366493564850704e-03
772 -7.7182122498587538e-03 5.0749276934552116e-03 1.6407509151836520e-02
773 9.4558420275492779e-03 -7.4438428121212201e-03 -1.5427753521378398e-02
771 -2.5642181488691063e-03 6.2043323757015479e-03 2.3566816030978089e-03
774 -2.6164042617932311e-02 8.9472340934559236e-03 1.0679978486874023e-02
768 -8.9563412497280855e-04 -1.3628216594540842e-03 1.2840451980857825e-03
786 1.2301780625256660e-03 3.8246920077085319e-03 1.8911721159287295e-03
770 -3.3390424284772719e-03 -6.8175783123333739e-03 2.9221740454753015e-03
767 8.2403040828219407e-03 4.2264081815605011e-03 -2.6791152437069385e-03
769 -2.4981819903585620e-03 -3.0666809636501276e-03 -1.5540539750137704e-02
722 3.3154995129376437e-03 2.3745388740903867e-03 -4.4691042596503947e-03
780 1.2436151291122675e-04 1.2843939491033298e-02 3.9923127179980673e-04
765 -1.2069276092178949e-03 4.5617701825068898e-04 2.1109945629792268e-02
766 6.9956578737230303e-03 3.7654389565096699e-03 -4.7854353035877237e-03
763 -6.5314629766540832e-03 4.8509990145285562e-04 -8.0870675375729201e-03
779 -8.7149358271094678e-03 2.8694811473029182e-03 -7.7144825717777288e-04
778 -5.2975423029708079e-03 1.2230231841956337e-03 2.5804837319033549e-03
787 -1.0854180701631820e-02 1.9571299781936818e-02 1.3518165017555527e-02
781 7.7811041108450264e-04 4.3942563723416026e-04 -3.1355608563245841e-03
784 8.1466520067529388e-04 4.9369402883802640e-03 7.0008618731677028e-03
783 7.2909320665825849e-03 5.5391041988386359e-04 1.1076020019356429e-02
782 5.9468597119952003e-03 -7.0433927522955894e-03 -4.8704382085029236e-03
775 -3.6953302947523763e-03 -9.8851356944274684e-03 6.7224557957284341e-03
777 -1.2663579772171796e-02 -6.1401454273394872e-03 -1.3147766108636782e-02
776 1.9311349758514104e-02 -1.8166569752974038e-02 -8.9703542866730358e-03
764 6.4255811835702429e-03 8.2715455532497532e-03 1.3895019151104399e-03
680 3.2079041007956697e-03 -7.8217754856648048e-03 -1.6033682395066858e-02
762 3.0830442032691151e-03 3.1215148282417293e-03 3.9740652854701975e-03
688 -2.1479822256493483e-03 2.5852905206180041e-03 -4.3668021928310686e-04
629 9.1367672033768384e-03 -8.2014207429301402e-03 3.3654804527397646e-03
630 -5.6519430347090182e-03 -6.1012169001799562e-03 2.4710610161168822e-04
662 3.1694205312875298e-02 1.3293219756680578e-02 -5.2108470590904303e-04
625 1.5868061123066519e-03 -3.5453377722887728e-03 -1.6493908076191477e-03
627 -2.9586829770130944e-03 -9.3759987395917294e-04 -6.1573810279107423e-03
632 -5.5810587716613718e-03 -3.1223443041511244e-03 7.7264039120014585e-04
686 -1.8862140499067013e-04 -1.0362327849110233e-03 1.5751606458975316e-03
626 -8.5649424184205828e-04 -5.9063574537222630e-03 -4.5095692610040627e-03
685 1.1596768609510916e-03 5.1744172121126583e-04 -3.1664473701848933e-03
687 4.6568133858660727e-03 6.4281402415267602e-05 4.2664385420618893e-03
692 3.6269785948747022e-04 2.2453757542521650e-03 7.9948324195948332e-03
672 4.0142525464848680e-03 4.8199014507125928e-03 9.5245787355753477e-03
647 1.1374168035906143e-02 -1.6576239440797867e-02 -9.7846923957261057e-03
635 -2.0818862901321424e-02 8.8712680265517589e-03 -3.9228997569242495e-03
639 -8.1617427796314181e-03 -6.1801952996872237e-04 6.1444822398378056e-03
641 -1.2191978869649168e-02 2.4821848443086140e-03 1.7394770944000947e-02
634 -1.7112055362917338e-03 4.5045021547852502e-03 2.0724914888002309e-03
640 -7.1951099239927060e-03 3.5872579949990185e-03 6.0440134966209483e-03
636 -3.2179318953274659e-02 -1.1451746970002331e-02 -1.8018199873798921e-02
611 -2.4728381981526163e-04 -1.8679882513191463e-02 8.6317229990627749e-03
609 6.8982032284657597e-03 -7.9887448797589938e-03 -3.3349262328957610e-03
612 -2.5928547392319663e-03 -2.3261708897878792e-04 5.5696989161506828e-03
615 -5.7178505555913221e-03 -1.6479468722243372e-03 3.3617884490153068e-03
618 -3.7399384243231976e-03 2.7840342779242489e-04 2.2494460597072162e-03
617 -3.3177658566577949e-03 5.2142468054933505e-03 -8.3197688960538990e-04
610 -9.3329754396448885e-03 -1.8929026533275019e-02 -7.9323227060013306e-03
875 -2.2601970752436959e-02 -8.8506315628510673e-03 -2.6450472719595473e-02
674 -1.6335122703722380e-02 -1.1133964420075131e-02 -2.4276126939862179e-03
667 3.6866472250540270e-03 -6.0493866403288235e-04 3.2141311818392020e-02
666 -2.1022161895352037e-02 1.4811872248500771e-02 7.7113903466205346e-03
696 -5.6682540838757373e-04 2.8104633938222731e-04 -3.8297377693097402e-03
706 1.3023420870941107e-03 7.4739592781589452e-04 2.4827340225048859e-03
703 2.3669220840290112e-03 -1.0908592751947794e-02 2.4094098830459668e-02
708 -8.5842255769782994e-03 -6.6624726810552426e-03 -8.5319308033096324e-03
714 -1.7187173808674131e-02 5.5488773439043614e-03 -2.0189089796981700e-02
704 -2.4188593428095827e-02 -2.4679515144767170e-02 1.4076157873327335e-02
702 1.3523608031653863e-03 -8.7948557270185604e-04 -2.1998478547346069e-03
711 -7.1294267777752256e-03 9.1347015261039315e-03 3.0493991865940626e-03
715 -1.8554784551225059e-03 -6.9097242568068248e-03 -2.2933930620766755e-04
717 5.6718609353991478e-03 -3.8752859321159764e-03 -5.8707780077398627e-03
713 -1.4794379364392009e-02 -7.8254668881658457e-04 6.3086451702398742e-03
701 -8.7917195657570019e-03 3.8597721834074004e-03 7.9837205795508272e-03
705 -2.9262347322446028e-03 1.9124598513767556e-03 -3.5419199285701901e-03
707 -1.4882676867007149e-02 7.1512631044041144e-03 8.9690975208658198e-03
695 5.7505999319713867e-03 3.1810089665991461e-03 2.7506799593089580e-03
699 -1.5850814380154260e-02 -2.4349231488790649e-02 1.7449004171785510e-02
697 -7.7190072356469097e-04 -3.0186499510737356e-04 -5.3862012038713662e-03
712 -2.6091790345240669e-03 -2.2343168238750685e-03 -3.3403117657144887e-03
700 -1.4160565478352079e-03 2.5587679349521964e-03 5.2597391670314506e-05
709 6.7971724739817148e-03 5.6315982359945076e-03 -5.4304498752497134e-03
710 6.2969772141398912e-04 -1.2422211693040364e-02 -1.8974195129235056e-02
698 6.6625602267333228e-03 -2.2222264132781906e-03 -3.0388006237579185e-03
716 -3.6230013709406712e-02 1.3629727241571576e-02 -1.4959931336422590e-02
721 1.0800644540696668e-02 1.2941016756334795e-02 1.9463016523412573e-02
718 4.8608768244909287e-03 -5.5965076743154556e-03 1.3166456512591436e-03
719 2.6607686676969937e-02 -1.3921394512128942e-03 5.7983692053815298e-03
789 5.9538008897400060e-03 4.0916791227266856e-03 1.2856953148362754e-04
790 -2.6764803799360216e-03 -3.8235813977455387e-04 -3.1708258642665975e-03
732 -5.7341609580579297e-04 1.5066361423755280e-03 -8.9420373744188066e-03
725 4.4879412572114497e-03 6.4156968437230587e-03 4.5779595594996484e-03
727 8.4222953919112185e-03 1.7769207241454326e-05 -9.7163214681437928e-04
736 -3.5620042112038974e-03 1.5049824762926761e-03 -2.1012705347918910e-03
728 5.7906597950960290e-04 2.7756286339157181e-03 1.8591629502191826e-03
726 -7.7566233906151303e-03 5.0350041689193690e-03 7.3196769582677089e-03
733 -1.2477009634275916e-03 8.3381498835905336e-03 7.4246634847941503e-04
731 -2.8476419540769785e-04 2.7271859790999071e-03 8.8888785745833959e-03
729 -3.3224589796367471e-03 1.3274270635674212e-03 -1.1287611082058824e-03
730 6.3137003319372349e-03 2.7221618853727138e-03 -1.4161692972456945e-03
735 1.2518756998803953e-02 -9.2600521368308986e-03 -1.8895899765637245e-02
739 -3.4328463045486496e-03 -3.2269408738473371e-03 1.9499923840188633e-02
737 -9.4691855015222332e-03 7.3926231596109200e-04 4.8518246671416469e-03
723 4.6873035687805048e-03 -7.8818026003132230e-03 8.5803546397259772e-03
724 1.0989861180299650e-02 -5.9163698151607413e-04 9.7465728006401731e-04
744 1.8982650398834747e-02 -7.0871504387884894e-03 3.1383132285579228e-02
689 -2.8094785467602909e-03 3.7799629684667551e-03 5.7586082507045857e-03
690 3.8503237191512864e-03 5.2172381518768530e-03 -1.3670644926795709e-02
694 -3.1609019349677051e-03 9.6139868576811940e-04 -1.0472827969046120e-02
693 7.3279601109066152e-03 2.9540927135778636e-03 1.5677612944298431e-03
691 -1.4160848009611667e-03 -4.0617108480352814e-03 1.1578749570701110e-03
743 -1.7724397457273246e-02 -1.7475902779593766e-02 -3.2840081747042248e-03
738 4.6988510497342224e-03 -9.4393560531728787e-03 6.0161498952571143e-03
734 8.2594641782020445e-03 -1.9928660674672256e-03 4.4143448923679310e-03
870 2.4703365344379488e-02 2.6654704309663417e-03 -2.6564912833997367e-02
788 -3.1017361535334046e-03 -2.8094337469090655e-03 -2.8960118473533294e-03
825 -2.5176092267551672e-03 -2.5896808112662985e-03 2.3319031615640939e-03
867 8.7585535706420393e-03 -9.5345211408857109e-04 3.4271802508988439e-02
865 1.2026473340623436e-03 2.6209534735078441e-03 -8.3395357083638393e-04
866 3.3317135250982848e-03 -5.6598009775764334e-03 2.4167085496094557e-03
874 -1.9664193834691419e-03 -2.7543988812766883e-03 1.0676929337742773e-02
876 -8.7278188272435931e-03 9.0261877537851660e-03 -9.8010564350356332e-03
872 4.1438219695298017e-03 -7.4321959239731592e-03 -9.3693093822034279e-03
834 -5.7433361984436954e-03 -4.6524667054057426e-03 2.2685595364951607e-03
795 1.2851181260081564e-03 4.0688682582213313e-03 2.5025878493970064e-03
882 4.0375227995634666e-03 -9.2443350940875748e-04 6.6855070083847183e-05
838 2.8120951733287915e-02 5.1850607507501157e-03 3.2435756351603597e-04
877 -1.0171722153154740e-02 -2.1423958876919620e-02 -1.0549242539993594e-02
889 4.0901853858177923e-03 6.4887394142498032e-03 2.6178294543737386e-02
888 3.3966804954644117e-03 -9.2547305209387098e-03 -8.3169030349468601e-03
890 -4.2740528492253967e-04 -1.6458506286425638e-02 1.0764037928745999e-02
887 5.1544348934955825e-03 -5.6505650134045932e-03 8.5183644458151023e-03
884 -6.7495892904777006e-04 4.1256728284089234e-03 4.4570688641400111e-03
886 8.6983970776470607e-03 -1.3276016732207054e-02 -1.7588941082928990e-02
883 3.5680133316974565e-03 8.2446479952343246e-03 -1.2954875711839738e-02
885 3.2910655440922180e-03 1.6793690273295445e-02 9.0459373712883512e-03
881 9.5884993331376168e-03 -2.2597601274907558e-03 4.6633199997462188e-04
879 1.3232694385681555e-03 5.9581944688307745e-03 -1.9269279157281087e-03
869 1.6352452581103993e-04 -1.7705399415302860e-03 -3.2363693869958050e-03
878 5.3326973781772941e-03 1.7246371241353201e-03 3.6061609063496332e-05
873 8.3916675433133373e-03 3.2999286949852145e-03 -8.1701260177315192e-03
871 6.5497735517624205e-03 -9.7854423762852973e-04 1.5597864828156567e-03
868 5.4537967201208695e-03 -1.0885513539260216e-02 9.7562611875216358e-03
880 -1.9690389804410825e-02 7.3229989880580718e-03 3.1015746234441611e-03
1069 -5.0024104625979770e-03 1.7551360761325505e-02 4.1756655672630207e-03
1066 4.2980578122922726e-03 -4.3879748114493029e-03 -1.6681966796463961e-03
1065 2.5536289508401797e-02 -7.3217486620956651e-03 -9.2836964770906753e-03
947 8.0123994269716697e-03 1.6402538852319095e-02 -1.5047240450039459e-02
949 -9.5089377574612589e-03 -2.5813670131805872e-02 -2.2350987404322422e-02
946 6.1576685462160722e-03 -4.9110433681775964e-03 -6.3531641281002410e-03
959 -2.7990704994569075e-02 2.8807893245601384e-02 -2.1421394673037004e-03
943 -3.4156159291273187e-04 5.1008497900697216e-03 -8.4343803973395345e-03
952 1.4950775066237709e-02 2.0042156021915403e-03 3.0333264797108520e-03
953 -4.3991331673958389e-03 1.8591959889145530e-02 -3.1382678249357914e-05
951 9.5141850723543767e-04 -3.3785929197224984e-03 -3.9541855482750415e-03
954 4.0684686719860995e-02 1.3700197409228978e-02 1.4925613583453266e-02
948 -3.8318295398783982e-03 -4.9281253821242769e-03 6.0733066570818530e-03
963 7.6187119531996809e-03 -1.1851207509270083e-02 7.7899388307421111e-03
958 -5.3748593190744501e-03 2.9948451793726668e-03 -4.6350191867349649e-04
957 1.2415288643112428e-02 1.3159411205041478e-02 3.5503171577661008e-03
956 -7.1541173960925370e-03 -1.1245826614573417e-02 -6.6882856296129334e-03
955 -1.1914910007410715e-02 -3.9522529676071722e-03 -2.3446182535030789e-03
960 -1.3256839904888764e-02 1.4156674590593043e-02 2.0401082177509213e-02
961 -1.8054671274428471e-03 -6.9549294342724057e-03 1.0867348533104344e-02
950 1.8329345163419287e-03 -3.6627055760889655e-02 2.0247702908300254e-03
966 1.4319347243507951e-02 1.6412126102611632e-03 5.5998347191136481e-04
962 -2.4908068281922630e-02 -2.0793686420524194e-02 6.7272351247295399e-03
965 -7.8202837220768540e-03 -4.1596880025477918e-03 4.0326943653116619e-03
964 -5.1089110837692596e-03 -4.2458980872548298e-03 5.3006066106495494e-03
967 -1.5741708896840662e-03 6.4947930174262779e-03 -5.5322638998517876e-03
820 1.1952440294970279e-02 8.8846534075434982e-04 3.5291884726458399e-03
814 -5.6621567771194961e-03 9.5258473157174787e-03 -1.3529168121845663e-02
819 -2.1324157871672151e-02 3.1939540212255098e-02 -2.8080819663296465e-03
823 -3.5002782498344896e-02 1.8952421031587805e-04 -1.0957839921383735e-02
821 -1.3968303391915882e-03 2.6895638909268443e-03 4.6465676951896426e-04
818 1.1091940240431264e-03 -2.3573850009801366e-04 -4.7671624328948113e-03
817 -3.8041018580530675e-02 3.4433948569578153e-03 -5.8838775555968481e-03
822 5.0902678942610332e-03 -5.6627682082158104e-03 -1.0415057166068889e-03
815 -1.0274627505395329e-02 2.6605132752428495e-03 -1.1410931110418442e-04
824 -7.7021271819631880e-03 1.5630306067215705e-04 -1.9119156229814527e-02
806 -4.0493737984609790e-03 8.5581121869398331e-03 5.1776754838988867e-03
800 6.1715328062602014e-03 3.0315331047967905e-03 6.0281363278009859e-03
797 1.0559590770080128e-03 3.5877637107600735e-03 3.1042888108901862e-05
792 2.0349065445997828e-03 1.0655566853122508e-03 -5.5790467268906976e-03
799 -1.0291068686767961e-02 2.9467546652010685e-03 -7.1397722875526177e-04
796 -2.5881757123474530e-03 3.8530311389145628e-03 5.4517180064360691e-03
793 1.3450074348003735e-03 -4.0881990628048766e-03 4.5692029497675221e-03
794 3.5371999579443883e-03 1.2482538460989216e-03 -1.6907236832100169e-03
791 1.0765799801205622e-03 3.9268797744182856e-04 8.8071473658772517e-04
798 -2.4180963064122257e-03 -3.0978994245373272e-04 -2.4957050130600829e-03
802 -3.2481047448083950e-03 -1.3325820733544064e-03 1.3208497390393608e-02
801 2.3157869721702707e-03 1.3377293049977423e-03 -5.0865791745794428e-03
813 4.7006238235641103e-03 -1.3083600721323254e-04 1.1652319683651725e-02
816 7.7015092822897329e-03 4.1629974424263428e-03 -5.8426137520779450e-03
812 -3.7151241013531405e-03 -1.6987723475441622e-03 8.6385916029924677e-03
804 -1.1132118726732500e-02 -1.2154044338188331e-03 7.1782131802890113e-03
803 -3.6950381271307802e-04 2.2041415634558256e-03 2.7221432607353827e-03
752 -5.7126380423188176e-03 -4.9044270245629388e-03 -4.7696227397941255e-03
753 5.8499590663473452e-03 1.8937896141234704e-02 2.9314982884491299e-04
759 -9.9112175649996338e-03 2.0661422596471624e-02 -5.9791608983159363e-03
757 -7.2880382071018280e-03 1.3501582781899958e-02 -8.4814919134077252e-03
755 6.3688130079552173e-03 2.4341134071748866e-03 1.0713713449791923e-04
756 5.7536929920087897e-03 -1.3035436265142296e-02 -5.6875300938567762e-03
758 -5.0465038225397706e-03 5.9358626036815181e-03 -2.7404615832648401e-03
760 -8.2762439220582466e-03 1.0586004879052591e-02 -1.1503983744798468e-03
750 3.8582351079600261e-03 -4.2031368031541748e-03 5.3382591435594930e-03
749 -1.8707140533799562e-05 5.7690128158352965e-03 -9.1128674097465875e-03
751 -1.0174275468553966e-02 -2.5286859364920398e-02 -1.6717129394581656e-02
754 1.0934650211246604e-02 -1.5708557649582993e-02 -3.0227064657336869e-03
805 9.0151980571560972e-05 6.3620609794141341e-03 2.0246470242849457e-03
747 7.5033216023168321e-03 3.1261010986805456e-03 1.6369030357221232e-04
742 -6.1586242557363341e-04 -6.2323513535708502e-03 1.0054829171940959e-03
740 -7.3994498825253633e-03 2.8209367110451299e-03 -4.8971833333767657e-03
745 -3.1629623735404682e-03 -3.1751957627265868e-03 -1.8588205597607121e-03
748 2.1230574026700035e-03 -4.5768713824967840e-03 1.4092040188720649e-02
746 1.1680498063457773e-03 7.1398363650771830e-03 -5.9452158098094645e-03
741 -6.1188691562002618e-03 3.8513176540554074e-03 -9.2378185686604018e-03
860 1.3992766485639883e-02 -7.7009516535403435e-03 -5.2491282186904169e-03
826 1.5012398728169595e-03 -1.4549007018060435e-03 3.4469097585796207e-03
827 4.2091989811902462e-03 9.0923101114278920e-04 -4.2527404766862223e-03
830 1.2109291491341494e-03 -2.1352226083021877e-03 5.1212356488600256e-03
829 -7.4922784325790895e-03 -6.5632921028848257e-04 2.3487465876429019e-03
837 -8.5202027870345063e-03 1.7727649122545479e-02 1.0870341215863475e-02
828 4.6412647892513370e-03 -8.4013284653723381e-04 -3.0471021487571198e-03
839 -2.6467199493068199e-03 -3.3067573422864661e-03 -5.8096445632109279e-05
835 -7.8780195300151221e-03 1.7754647511504869e-03 1.4619679227451632e-02
853 -7.2341037184658055e-03 8.3536098976617762e-03 8.4153874856770904e-03
854 -5.6229286106992274e-03 1.0188965524267141e-02 -1.3567735701428923e-02
840 4.0123807613821633e-03 -4.7336699286420507e-03 6.0334992722725807e-03
841 -3.3883956906434636e-03 3.5327343993109398e-03 1.0128415877531946e-02
836 -7.8442814798298927e-03 3.1716815524827446e-04 6.3627809073250174e-03
842 1.6259356117556755e-02 1.8666841820426810e-02 2.0715125437786143e-03
843 -3.1462372012350070e-03 -1.5026639508751952e-03 -6.3394955636370952e-04
852 2.6698591217153224e-03 -5.3173463953626310e-04 8.5291469160514843e-03
858 2.7699155749035692e-03 5.1893023881525750e-03 2.4547539809038721e-03
761 -3.0134661292966127e-03 6.5538969076447710e-03 4.9537867110180213e-03
859 -8.3452007910479273e-03 -4.5838547827007350e-03 -2.4969666110198581e-02
1116 8.4260457440191140e-04 1.8890143601481371e-03 1.6631600077282867e-02
1120 5.7385058575375918e-03 2.5535910391283969e-02 1.0981708429775944e-02
1119 6.7792804195719843e-03 -6.3889550811476398e-03 7.9248782784505749e-03
1117 -4.1347294947983492e-03 1.5081332189389098e-03 -1.1993056271815234e-02
1118 -7.1168456169624804e-03 2.1815822197709455e-02 1.0568645166060337e-02
1056 -2.4509704048131090e-02 -3.3037267888134459e-03 4.7582217153106813e-03
1057 1.7546302081296188e-02 -3.0431269379337066e-02 -7.4658895818218154e-03
1055 -8.7952354304389260e-03 -5.0996126518964499e-03 -2.5928283353716833e-02
1054 -6.6046076356015568e-03 -7.1667794700185179e-03 -4.5436274780468564e-05
833 -1.9519223236332450e-04 -3.2454256620810013e-03 2.3855207107065990e-03
891 2.6323197319136687e-03 5.6643742440301971e-04 -7.2952244159934642e-04
898 -1.3399170623170588e-03 2.6983155358263496e-03 2.8114907830926873e-03
897 4.7924143014387074e-03 1.6298489802003076e-03 4.1445083547480091e-04
892 1.9998448964283883e-03 -4.0178425361507304e-03 -8.4990606898701704e-04
893 3.3847073789222862e-03 -2.1039906348706439e-03 1.0674914729569648e-02
929 5.6944471231413281e-04 6.3210392164189094e-03 -6.2470138640192217e-03
896 1.0437371350162461e-03 -9.0125454231463568e-03 6.9870894862512321e-03
928 -6.6070550345783720e-03 1.1720558755096925e-04 -5.2557353953411661e-03
832 2.6263254427747297e-03 -1.1749845410584008e-03 2.7251243419452627e-03
831 1.9045073054431330e-03 -1.3986086635448282e-03 -2.5331064712876220e-03
895 -2.6529432192084934e-03 -3.6446273229531960e-03 -5.4761355711917216e-03
894 1.8999019637592374e-03 5.8825617991535930e-04 3.5604304285863850e-03
916 2.1306655549814358e-02 2.9031586574907770e-03 -1.5707997594226211e-02
901 3.7458257809823100e-03 -3.4288749774226356e-03 -3.3141236023593403e-03
917 -4.8399084628306208e-02 -1.9862433617659899e-03 -2.6314704223940985e-02
915 -3.9885096475387348e-03 6.7206108097056017e-04 1.8645547609217757e-03
922 -9.0044608948002675e-03 2.2494412590358816e-02 -6.3629132964689630e-05
927 2.4689244493302661e-03 -5.8478150730409059e-03 3.1752687420731791e-03
924 -9.4998369295926858e-04 -1.7869652400644826e-04 9.7465852738167179e-03
923 -4.4299068651251087e-03 -3.6540874366825884e-03 -1.7341831879069500e-03
921 4.8554313194374109e-03 7.7178872743898511e-05 4.8540556339162341e-03
925 -4.6694256723315210e-02 2.9382928726506441e-02 2.1594309932775432e-02
1172 2.2753046929205826e-02 1.2250643617388328e-02 2.9624885949335700e-02
1111 -3.0811647564019987e-03 -8.3302148451129560e-03 -2.4296224288323232e-02
1109 -5.0691359327163284e-03 -1.0304279208683204e-02 -7.1401403447283818e-03
1106 3.4758421331909277e-03 5.7426552729671100e-03 -3.3844600415943748e-03
1108 2.4335060884145623e-03 -2.2857321546404237e-03 -2.0502373068683639e-03
1101 -4.5738716243732659e-03 -9.5649945957080439e-03 -2.3855065561981218e-03
1107 -9.3252119214491398e-04 4.5606203522525549e-03 -2.9295173198708828e-03
1070 1.8597100926735829e-02 -9.6355533839008727e-03 2.4817554392794979e-02
1063 6.3075770154011812e-03 -2.8419424056496098e-02 -2.1227990886902542e-03
1061 -3.5056816284180607e-03 7.9534883390809479e-04 -2.8793211540628936e-04
1064 5.1873357284133743e-03 -1.4819352582354775e-03 -4.2200751888161477e-04
1060 2.4206737812734795e-02 -1.6913365186607191e-03 -1.6520350601508641e-02
1058 -2.3171290447069142e-03 9.9111200314517568e-04 -8.5994280145653048e-03
1059 1.3243725249092963e-02 -2.4243533467475650e-02 -5.3652155723756863e-03
1049 8.1597585616735634e-04 4.3052764569082805e-03 2.6231735397146054e-03
1050 -3.3475275666336518e-03 1.7846123816346177e-02 1.9514529576700697e-02
1067 5.8356917064579699e-03 -3.9173136249107381e-03 3.5819416588080888e-03
1068 2.7399495227334234e-02 2.1151213104173968e-03 -1.4247724258036915e-03
1062 -4.6542184664239905e-03 -1.8170968850557312e-03 2.6392454796167333e-02
1037 1.3209564619849831e-03 -3.9910032141291995e-03 4.5105990646507801e-05
1100 2.3828361036253519e-03 -5.8223404815136955e-04 -1.8081450155044343e-03
1048 3.7933552486992005e-03 -1.5820076034222419e-02 3.4014034335870403e-03
1047 -2.4286523431303685e-02 -6.6159434829744035e-03 1.1611811386308131e-02
1046 6.3225176329998588e-03 4.3710696889382727e-03 -2.3240160275756630e-03
1045 -3.6130343662100941e-03 2.7158750809780016e-03 4.6616761326335316e-04
1114 -3.1557746238469130e-03 -2.3101275069590636e-03 -5.0049812286731468e-04
1115 8.3915313751624864e-04 -4.6295678252691441e-03 3.0598783502187540e-04
1052 -1.8317807876518190e-02 -6.6805077886255863e-03 1.8258015048846395e-03
1051 -5.8551933351634264e-04 3.2610443802259352e-03 -5.3725038436567146e-03
1053 3.9337858012286958e-03 8.9105062786649805e-04 -3.9899382770343245e-03
1034 -3.2275788432962306e-03 1.2241237808297759e-02 -7.9904562751055715e-04
1043 -3.4181675101037969e-04 1.0642513801404961e-02 -1.9620867584528724e-02
1033 -6.2494173550015184e-04 2.0709932420018584e-03 -3.2440548850821007e-05
1032 -3.5302293962460834e-03 -6.7955852745263878e-04 1.4520494067614717e-03
1036 -7.4756038466074360e-03 4.7059921368057846e-03 2.6170892706197219e-03
1001 -6.6855404951493445e-03 -1.9982975054075479e-03 -6.0360411096731714e-04
1000 5.1826288798529196e-03 -3.0007585715896117e-03 3.9720129395676863e-03
942 1.0681991795800621e-04 6.2815437021492941e-03 -6.4127509421086303e-04
944 4.8130005940864974e-03 9.9979378190545795e-03 -1.3690849214107514e-02
931 1.6926651857282571e-03 9.4662733086738234e-03 3.0314483582804727e-04
937 -1.9892062886674128e-03 -1.6856902515779311e-03 7.8543886747566016e-03
968 1.2206797130114582e-03 3.5801364955161865e-03 -6.5429633740088887e-04
994 -2.6959417501200033e-03 1.3950452546936177e-03 2.5366392653895981e-03
938 1.9244244152278292e-03 6.5860860302788087e-03 1.6373727476948997e-03
934 -1.7277364196948719e-03 6.5789437451222832e-04 -1.3320347492607979e-03
935 -1.2412926187484654e-03 5.8028145606846596e-04 -4.3834232880902713e-03
939 1.1406649325877845e-02 2.2889839050344450e-03 -5.6017014848506429e-03
936 -3.1896413955937002e-03 5.0589116297779331e-03 -1.3584432271406658e-03
995 7.4869513004991572e-03 -7.4955545195022769e-03 5.0858943927559654e-03
941 8.6008377420640075e-03 9.6141887455290752e-03 3.5434519678865370e-03
996 7.3545374347084042e-03 6.2596662553377237e-03 3.4882914360127621e-03
945 -2.9850787164835539e-03 -1.7074586852572095e-03 -2.8251730507101659e-03
933 7.9880711573432281e-03 -3.7805778418051367e-03 -1.9863978643584789e-03
940 2.8053983545877834e-03 2.6523740467345024e-03 3.7247269843543140e-03
930 7.4735869638715754e-03 -2.3036531426320842e-03 4.7530283811136010e-03
899 4.5970309011039153e-04 -5.6846295876017252e-03 7.7655886624727931e-03
932 2.6860028062626012e-03 -1.7676367791455412e-03 3.2546703513600453e-04
906 3.0034279997500856e-03 3.5992814436240866e-04 4.0676529087121218e-03
907 1.5761735200611967e-02 -5.9753241681779930e-03 1.2783490139158650e-02
919 6.6728808863733774e-03 -5.9325001956738108e-03 1.0026779483555543e-04
926 -2.2849112862657839e-02 -3.6112606014771101e-03 -7.2014881720823196e-03
918 4.7149843966084563e-03 -1.4906646538657060e-03 -1.6698019909068432e-03
920 -1.0232673379363537e-02 9.8787725311391128e-03 7.3409465548074943e-03
1171 1.6263333367289707e-02 -4.0758798179612284e-03 -1.2004055057407039e-02
1163 -1.6011338353422333e-02 1.3018616956351297e-02 -8.5819872301075850e-03
1156 1.1356759315261105e-02 -1.7710978698184728e-02 1.6243209535674735e-02
1154 2.9237944281605477e-04 7.8567274279070908e-03 3.5000189851545917e-03
1162 1.1303423589168889e-03 -1.8836541270919917e-03 4.3104889289589344e-03
1169 -1.7362465099675136e-03 -1.3791865166279849e-03 -1.2155841414928975e-02
1164 4.5322464022774546e-03 5.8664622852335853e-03 5.1979069275259514e-03
1161 5.8554518767857952e-04 -1.7856316071561064e-03 -3.7347557519787590e-03
1167 -1.8176714443856007e-03 -3.7131546622379413e-03 8.5014717352959672e-04
1170 6.9802063594740687e-03 3.4398475553373336e-03 -3.3369997361871618e-03
1166 -7.7113980799916691e-03 7.4775602375304088e-03 -5.2935513486515207e-02
1168 -1.9120451643454228e-02 -2.2405244467290496e-02 1.9753874721488997e-03
1151 -3.4733534336889110e-02 1.3316712524860516e-02 -5.3089140232947538e-03
1105 1.1299982265269985e-02 1.3592203300226205e-03 -7.2376476167117969e-03
1102 -8.6387493702585732e-03 3.0737286615721486e-03 -2.6521797792829409e-03
1103 -1.7169355489680112e-03 7.6867245470386338e-03 -5.8743801541424855e-03
1104 7.2468575733206802e-04 6.1902292181039015e-03 5.3560124734995688e-03
1134 -1.4893998715094156e-03 -1.8125789230642223e-03 -3.0935740768465460e-03
1135 -6.3698641253824659e-04 4.3683204116709926e-03 2.0202833862524418e-03
1155 -1.1688703988822095e-02 1.8196592141133564e-02 -7.2799419309647721e-03
1136 -5.7451601869007128e-03 -4.1421005670717074e-03 -6.0185772729744809e-04
1146 -6.8465138024312961e-03 -3.2241648354592810e-03 1.9033586137734714e-02
1042 -1.3335274297699511e-04 -4.3512132114152599e-03 8.3066574363611456e-04
1041 -5.7832981352082318e-03 5.6055939781697300e-03 -1.2752059744201127e-03
1038 1.7323160477965820e-03 -3.5666089917292428e-03 1.4496944664206316e-02
1098 -2.2103207567911385e-04 -1.9812184845188962e-03 4.9512346703355871e-03
1099 8.2938835722845324e-03 -3.1420615819701720e-03 1.7631175074195652e-03
1039 -2.2877186122564901e-03 -3.8610813813765477e-03 -5.4885041464220277e-04
1044 3.4678234572815768e-03 -6.7292202338972030e-03 5.4254526958591011e-03
1097 1.3761917237545978e-03 -2.7198403344121896e-03 -2.6749326326162581e-03
1040 9.5167771404752006e-04 2.3368363362916327e-03 2.4621794020020693e-03
1031 1.7513293975430218e-03 -4.3700936371226411e-04 1.2321662763720954e-03
1035 1.0142976247900145e-02 -3.9305747685330862e-03 7.0998451394023304e-03
1073 2.1524696914070846e-02 5.9807599781301164e-03 -1.7026230124187691e-02
1071 1.4295404839255156e-04 2.7901534142889587e-03 1.0142819889195548e-05
1072 -2.1948667036099149e-03 -1.4680886199163079e-03 9.4449192340933044e-04
1074 -2.0335734698240693e-03 -2.6185405541885493e-02 4.7033159597075422e-03
1075 -2.1463721247468055e-03 -2.2386069686550305e-03 5.4775251669815514e-03
1076 -8.1086003162806706e-03 1.3584788043426448e-03 -3.0516586965938157e-03
1085 -8.9073121854876865e-03 7.1329392562764831e-03 -2.6537600694965559e-02
1084 4.9181626927821895e-03 2.5372914094073835e-03 1.9927495740641797e-04
1081 6.6969670026870839e-03 -8.9653202782977535e-03 -1.2685655104877083e-02
1079 1.2563241950654700e-02 2.7848251250888006e-02 -1.9286284349519234e-02
1080 5.8258525254009296e-03 7.1957827447701713e-03 4.1822629385529272e-03
1083 -1.5666119974705524e-02 5.3042248152525605e-03 -2.9733951587077260e-03
1077 1.5561119589528913e-03 -2.2768124586670041e-03 7.3634087249347524e-05
1078 -1.7289967835327467e-02 -9.5072648683676916e-03 6.0233771047548995e-04
1082 -4.1163500593789469e-04 3.1829089561924381e-03 1.6304866297258420e-02
1086 -3.5637374319221253e-02 -2.6677058975551767e-03 9.2562656024699937e-03
864 -2.7680668234446839e-02 -3.7495625515644557e-03 -3.7951266189979280e-02
861 4.3996529157962373e-04 3.4256507199735406e-03 -5.5050421245071257e-04
807 1.1146677096491734e-03 -2.3003351868387122e-03 1.7672556853695016e-02
808 -2.6748936309949557e-03 3.5236724798089268e-03 -3.8155670300764146e-03
809 -9.8094392420123577e-03 -4.0674937963736521e-03 6.9485090830841067e-03
810 -2.1509213736038386e-02 5.5314315921905308e-03 -9.7697903546306031e-03
811 -1.7457038680007076e-02 -1.5429136457491987e-02 9.8652299267845099e-03
862 5.0866418961343805e-03 1.4637225929457795e-03 2.8085012595542784e-03
846 1.3182130777821034e-02 2.1305159672386144e-02 -7.8857962541906412e-03
844 -3.8033097072328616e-03 -1.0420612467882619e-02 -2.2318147446302738e-02
855 -4.1872131229963401e-04 -9.3310521252593648e-03 -3.2267162093355090e-04
856 6.9527037215277247e-04 -4.4095697929744587e-04 6.4251035246276345e-03
845 4.5504467180938910e-06 -7.4440137126159580e-04 -4.6173659044570933e-04
848 -3.3937100901437506e-04 -1.1188526835364239e-03 6.0259009597594384e-03
850 -2.2851109048574996e-03 -5.7498453771782738e-03 1.6051517075057156e-02
847 1.1515357360781759e-02 -1.6777339941597101e-02 -1.1480367245947415e-02
857 -7.0326877015237299e-03 2.7346785902373980e-02 -7.4277323488062480e-03
863 -1.3302257902413264e-03 -3.5073907524559559e-04 1.6185852286001777e-03
1113 -1.7318750673740658e-02 8.9819538099685393e-03 8.5305136888837868e-03
989 1.4460771759761881e-02 -1.9149807733314150e-02 -1.8788152983110842e-02
982 -2.7405215146166801e-03 -6.5744774924213862e-04 3.8179056921482184e-03
986 1.8073727487691909e-02 -3.6542398086340447e-04 2.7514504345512465e-03
983 7.5971379364109649e-04 5.9854468479856457e-05 -6.5901925601678894e-03
902 -1.4947114331131657e-03 4.0469495776623314e-03 4.5747777063475320e-03
851 -1.4330448001746222e-02 4.4838707826644402e-03 -1.2341939026859778e-02
849 1.1784608684647884e-02 6.9624304500277823e-04 8.9518253796379704e-03
905 -7.6106134154879969e-03 -2.4379908616460572e-02 -4.3088463055101483e-03
912 -1.0516232143459254e-02 -1.5133456775561818e-02 -2.3890869700742272e-02
1157 5.0540205429793570e-03 -2.8962062020731851e-03 -8.1936801569583596e-03
1160 4.0881768960884298e-03 9.6836940658205628e-04 -9.2272616736778206e-03
1236 -1.9125908064542892e-02 -2.3249527285802100e-02 9.6986596445402685e-03
1234 6.1896494765422902e-03 -1.7449656934775473e-02 -9.0500061010114416e-03
1110 -1.3234815060001929e-02 -1.0200515733322627e-02 -6.8125697773890673e-03
1112 5.3647351271083245e-03 3.3235821917524827e-03 -5.2303087987696610e-03
1159 2.0097828053097764e-02 1.6035469702444835e-02 2.4665933113368430e-02
1125 7.9385810033262838e-03 1.4062996266872595e-02 -2.3203363337441769e-03
1123 2.7304970492326861e-02 3.2293836136379157e-02 1.2615243908473571e-02
1126 -9.0765504433237883e-03 5.9379757085651378e-03 -1.4913804506022784e-02
1130 2.7585505271918282e-03 3.4227092682393122e-03 4.0012401450700815e-03
1131 1.4101870321156434e-02 6.6707675793419617e-03 8.2114674563307771e-03
1133 2.2729366334113248e-03 -4.7145859213912015e-03 1.9879203259723633e-02
1132 6.1280625709704065e-03 -8.1811205436704663e-03 -7.2301241226811986e-03
1121 -9.2105450059843299e-03 -1.1894772643100528e-03 5.6205786748024676e-03
1124 -2.5347137413852068e-03 2.8376253464566450e-04 -5.1136154102584350e-03
1127 -6.6822331348123940e-03 -2.0729448298008892e-03 -8.5630974134364270e-04
1129 1.6323684741772190e-02 1.8780534109885411e-02 6.9901375725249003e-03
1122 -7.1014222853848325e-03 -3.7733828110224341e-03 1.0497938711859856e-02
1128 -2.3695075298568003e-02 5.0598213718154707e-03 -6.0333080784159083e-04
1025 3.1983463106701002e-03 2.1034366509151471e-03 1.4204209116888170e-02
1012 8.1656974421511885e-03 -3.8660778209324495e-03 -1.0544104676053455e-02
999 6.4202523011508746e-03 -4.9281815807216620e-03 -3.7829892736413449e-03
1002 -1.7688728186951402e-03 1.8840698412697081e-03 3.0740912122048767e-03
1004 2.3851760247784685e-03 -5.0087613004264493e-05 9.4208353828751801e-03
1018 7.9244684266922289e-03 -3.1667854745594561e-03 -2.7044462307872445e-03
1020 1.2393215710296411e-02 1.8712346975910815e-02 -9.4295604317276997e-05
1010 -1.9531734779849089e-03 1.2279969285190790e-03 2.7410033042156733e-04
1009 -3.9978718906179241e-03 1.7408668655333548e-03 1.7526846546041049e-03
1024 -4.6759529901307106e-03 6.0421575135070947e-03 -1.9775237834267021e-03
1021 1.1231766413496850e-02 9.6295688511308496e-03 -2.0119925816936982e-03
1023 9.2570476555616770e-03 1.4390391099229816e-02 4.9280167024817354e-03
1005 6.3887105772704898e-03 -1.4661504640611155e-02 6.7648296294309136e-03
1011 9.5227738955730931e-03 -1.6102125179200378e-03 5.0115063142836527e-03
1006 4.7584912676850957e-04 -5.5094387292125079e-05 2.0910065272989370e-03
1007 5.5286573689541730e-03 -3.8920468926050018e-03 -1.8860065447913001e-03
1015 6.4351155995004388e-03 -1.3869600957900208e-02 -2.6324025366167701e-02
973 -2.5787912620449209e-03 -1.7300279676106034e-02 -1.0860149587680355e-02
997 -1.5285558894541276e-03 1.8841712429187476e-03 -5.3295675235347966e-04
998 -7.7927312749096617e-03 1.3860257899975343e-04 6.7248482218197564e-03
987 -7.6162638134524353e-04 -9.0766047058544214e-05 -3.4124479614637921e-03
988 1.9733527450690137e-03 -2.7117200505031750e-04 -2.6665977262465691e-03
981 -3.5107117867572220e-03 -1.0594854303189554e-03 -2.3378729150889178e-03
985 2.6534635852035028e-03 -5.4295577792438290e-03 3.1768351543756692e-03
984 -9.4058576574311385e-04 2.8203748866516896e-03 -1.6118377892104744e-03
993 4.6938433717038496e-03 -4.9061744419509595e-03 6.2237649223585642e-03
990 8.0966612020401587e-03 -2.5350455912243526e-03 -3.2882203057494818e-03
992 2.5615080345040651e-03 -1.9720161027486222e-03 8.4074163647254625e-03
991 1.2262591646468668e-03 -5.7510452823104812e-03 -9.9189865287702961e-03
972 -4.4864313583287199e-03 -6.7573207939841890e-03 1.6629288844309522e-03
1003 3.4131134749414995e-03 -1.8411248350663385e-03 3.9362093259156172e-04
970 -6.6354361105329784e-03 -9.4759148251072883e-03 5.2487298637467440e-03
976 -3.9189160811344529e-04 -1.3778843467232826e-02 6.9049704367767594e-04
969 -6.5714345906381262e-03 -3.3205832488163401e-03 2.3420422945154115e-03
980 1.1458849738679259e-02 1.3174326796667791e-02 -7.5042650319176478e-03
977 -1.6496066061705108e-03 6.1816356760618632e-03 4.7197733566884417e-04
978 -1.5823893027709628e-02 2.4498237199548776e-02 8.2143308586545630e-03
974 -2.0175069088289982e-03 -1.4735588033413477e-03 2.7811252802458493e-03
975 -7.2726284924152611e-03 3.7417631942070124e-03 -9.9963343467291271e-03
979 4.2927962090038695e-03 8.4860617953805718e-03 -7.0762914709051204e-05
971 -1.6872736966087553e-02 3.8151390101215147e-03 8.8096863294062876e-03
900 5.4300719805069567e-03 6.2830043757875365e-03 1.3171592114527150e-03
904 -2.2020261580801706e-03 -1.1407414972227024e-02 -1.9660115274740843e-02
903 -2.3416074357624395e-03 -5.0802602421114260e-03 -4.9428311460999047e-03
908 -1.1812479297669443e-03 -2.9992924127515293e-03 3.0466145499330518e-03
909 -1.7556521018431265e-02 -5.6904997836191755e-03 -9.6000325566425078e-03
913 3.6320168483887664e-03 4.2882895476886512e-03 1.2537079486405698e-02
910 -1.3115340511453946e-03 -4.5369663046669713e-03 8.1714709817570525e-03
911 -1.1861994764936969e-03 -1.5782630846402658e-03 4.7922303282213049e-03
914 3.7861989763953870e-03 4.9213854094687561e-03 -6.6274243758723452e-03
1165 -2.0302654536204202e-02 -4.0524455816393919e-02 1.4091032864124541e-02
1173 2.1017638195121684e-02 -9.2640843740706830e-03 2.4302765463206119e-03
1150 -1.5585486462927003e-02 -1.0625637993183707e-02 -6.4427880311434304e-03
1225 -5.9621488555543318e-03 4.5537764627591828e-04 -1.7423323176364965e-02
1231 2.2911169171429321e-02 -9.0650399789023381e-03 3.8893573844527594e-02
1152 -1.5862123618568061e-03 1.8079661833680862e-03 -2.6975106381212808e-03
1149 -5.8358939245738350e-03 -3.3219402638972892e-03 1.5479623289785661e-03
1153 6.7363418324730470e-03 -1.3077110755913977e-02 -1.8072584828830070e-03
1228 4.1168267120983495e-03 -2.4432384893189111e-02 8.0263778907818939e-03
1230 -2.4282647318983530e-03 -2.6111677869757994e-03 7.0279072526212277e-03
1232 -8.2090032767738377e-03 1.4658620122443799e-02 8.8488903638837130e-03
1235 -1.0923436591270073e-03 -2.3830748210125641e-03 2.7228671295627086e-03
1233 6.2986765601181447e-05 -1.8937413278197889e-03 2.4447175254973445e-05
1224 7.6372684240319753e-03 1.8737117090800374e-03 9.9525559773672449e-04
1227 -8.3077421470444807e-04 -3.4344533018242145e-04 5.4229369598292705e-03
1138 5.4750140129720452e-05 4.1702988846063832e-03 -3.8059123237874591e-04
1158 1.8409186748941978e-03 -3.5520187265252810e-03 -1.0084211000472730e-02
1139 -5.9764298797412136e-04 4.0965669163843940e-03 6.0288564716784862e-03
1137 -4.2286634450951393e-03 2.8919828173744355e-03 -1.1846337259404675e-03
1144 -8.5528266733936599e-05 2.2875783346924241e-03 7.7948673469160406e-03
1148 -4.7213524202562940e-03 -8.2685140347840812e-03 2.5036218819770545e-03
1191 -1.2435690828051035e-02 -7.7526749748864157e-03 -1.0791427732464212e-02
1193 -7.5500351688014705e-04 1.9137028209926335e-03 2.0618205122867285e-03
1196 -9.5945912127888052e-03 -9.7659131285169069e-04 -7.0090306924375364e-03
1197 -6.1458329054740832e-03 2.5065046196349004e-02 -1.0592731898638459e-03
1199 2.0852148858653387e-03 -2.4650717181025787e-02 1.1756241058691488e-02
1190 4.8971269556353678e-04 -3.6270699292828669e-03 -5.2041651399442473e-03
1195 -6.8370091570099795e-03 1.7210515199670012e-02 2.3303508074465920e-02
1194 -1.8817828210517299e-03 1.1263618802354563e-03 3.3978324112195054e-03
1198 -1.0755886758297005e-03 -3.6508116791452308e-03 -9.4907500324062002e-03
1030 -1.9004102237975959e-03 -1.3292437013574337e-02 2.7771299582614220e-02
1028 6.2796327592007264e-04 3.5592231382484780e-03 -8.2726674035541218e-04
1027 -1.0497051346525783e-03 3.4634460211085162e-03 1.5132243473460526e-03
1192 -6.0872199020122860e-05 -5.1717549907030541e-03 2.9973774743277245e-03
1092 -9.0221856299747729e-04 2.7208333438361572e-03 2.6763897838187202e-02
1089 5.9602937091987208e-03 2.9378486571580959e-04 -2.2304569726383345e-03
1091 -1.0825743434371361e-02 -8.1127282560838378e-03 9.2545213864967824e-03
1087 -2.0408952018941655e-03 -1.9104604242723825e-03 -1.8225444141421530e-03
1090 4.2788824966116376e-03 7.5744495530436547e-04 5.5058641351518499e-03
1088 -3.8869391657806681e-03 3.9115169375614879e-03 -2.2567262748694607e-02
1029 4.5968378625314884e-03 8.3693008237673908e-03 9.9620637307013885e-03
1026 2.2355139085945889e-02 -1.3327550806998042e-02 2.9488508572067640e-02
1022 -8.6554534459761911e-04 1.5538570033436928e-02 -3.4179676041982729e-02
1095 5.7563740447227453e-03 2.1871536317157081e-05 3.8776940974286286e-03
1096 1.1484015887979736e-03 -6.8026673804045760e-03 -3.7319401308634698e-03
1093 4.4224376961747745e-03 1.0482179512119115e-03 2.9156605626455968e-03
1094 -1.9179363997780118e-03 8.7213559282919573e-03 -1.0048002504652784e-03
1008 -9.7589633675045501e-03 3.5782502712592744e-03 1.9415334258722029e-02
1019 -3.1295062415296802e-02 -1.1302020864236715e-02 -2.1215017688974085e-02
1140 2.4243489855811508e-03 -3.2374887480329088e-03 3.2359433449644878e-03
1200 -7.9539185792956767e-04 -7.6101607222663192e-03 -3.2162303607742586e-03
1207 -1.7345825094201592e-03 -7.9367491069127390e-03 -3.0307160231464970e-03
1238 6.2819897335561099e-03 2.2050526742565176e-04 -1.8977796033689501e-02
1201 -5.3292592549757630e-03 -7.5851905150036607e-04 -1.9920929275550081e-03
1202 -7.2584250872414526e-04 4.8269844137742782e-03 -4.8437060726625207e-03
1206 -2.4950781649966049e-03 -5.1473764992509830e-03 8.1603004229689625e-03
1205 -3.2171691836036626e-04 -1.1087690511337865e-02 4.0595502343031015e-03
1203 2.6896832978837186e-03 -5.5192234582661381e-04 2.6038485294094561e-03
1143 -8.3203881020031574e-03 7.4209119072609023e-03 -4.4350070291337045e-03
1177 -1.2973331850779975e-02 -1.1722438187776719e-02 6.3422518350226579e-03
1174 -7.0654806409532643e-03 -1.2438023025378292e-03 3.1013368935036622e-03
1176 4.3363729187135486e-03 2.3665348893593514e-03 -7.3966638210905605e-03
1175 1.7322710581739800e-03 3.2673539744147548e-03 7.5115800850348528e-03
1178 5.6892067266236974e-03 4.9660721546224166e-03 -4.4932422784704010e-03
1182 3.8513538072140027e-03 -4.8519490031113006e-03 -6.1711700370523778e-03
1141 1.9243336665470076e-03 -2.4723764665318631e-03 6.0690897201265068e-03
1142 1.0958801623919463e-03 2.9985677519073857e-04 9.0664347893543665e-03
1145 -3.3363778879991718e-03 -1.6530958916966573e-03 -8.1144980416988453e-03
1179 5.0238031072492202e-03 5.3342174979559773e-03 1.1314217485106316e-02
1147 -2.2243424593189546e-03 1.1481635324372818e-03 1.2573678305071640e-03
1181 -4.2217415742369611e-03 -2.3869505650876626e-02 -4.7392449753243127e-03
1186 -3.9263677442723955e-03 -9.5658491279456779e-03 4.2465716353424993e-03
1180 2.5250244773224488e-03 -3.0631712078579127e-03 4.1355749569385261e-04
1183 -3.3494989421670837e-03 -2.1274925486321982e-03 -2.7684239652279253e-03
1184 -1.4291323232647722e-02 4.8670005744708578e-03 -1.1191396794397615e-02
1187 9.3419815750827497e-03 4.3038968328042975e-03 -4.8855840611820352e-03
1188 -6.2811569556297576e-04 1.4627710242532401e-02 1.5196844906491487e-02
1189 -1.4571014593848138e-02 2.7630707376245537e-03 2.3990877710459075e-03
1185 -1.0049842198269503e-02 1.1880816741226799e-02 1.7688144901096003e-02
1014 1.0169909428423513e-02 9.9023733868097946e-04 3.8578914977362550e-03
1017 7.7435560033101954e-03 6.0957656657129556e-03 5.3890406052304425e-03
1016 -5.0936662384709576e-03 -3.7839572266628132e-03 -4.2514274360213418e-03
1013 -1.4853391838848126e-03 -1.3285041764312874e-03 1.2215273893566624e-03
1226 -4.7162884960276191e-03 2.4359385700346084e-03 1.1798340079697491e-02
1214 -1.9910279748796979e-02 1.2672934022622644e-02 1.1280292487800278e-02
1210 -1.6407564063791417e-03 5.5962231301329964e-03 5.9068866453925390e-03
1213 1.8040555409078059e-02 -1.9189178953093664e-03 7.5086468939593214e-03
1217 1.6271244920485343e-03 -1.1452429063070315e-04 1.0281771968965951e-03
1220 7.2773290080070290e-03 4.8899506225136896e-03 -2.7483871863245093e-03
135 3.1623115424222879e-02 -1.0917214718993609e-03 6.5992843785161112e-03
123 2.1606761924471359e-02 -2.0114584551294335e-03 2.6275567525958486e-03
518 3.7679357036749825e-03 5.3745699619143009e-03 -2.5309564711265579e-03
471 -6.4499641952286586e-03 -7.4246457076945858e-04 5.9302526674016934e-03
470 -1.0549605226736508e-02 2.3451529493941025e-03 -9.8435199651187456e-03
532 -1.9072242915215201e-03 -3.0709747171897271e-03 1.2238223027336772e-03
133 -9.2420554240549395e-03 -1.2093328972171693e-02 -2.6865021072763725e-02

Bonds

1 19 63 64
2 19 63 65
3 19 63 66
4 17 496 497
5 17 496 498
6 18 496 499
7 36 491 492
8 36 491 493
9 37 491 494
10 19 499 500
11 19 499 501
12 19 499 502
13 38 494 495
14 39 494 496
15 39 494 503
16 19 436 437
17 19 436 438
18 19 436 439
19 17 433 434
20 17 433 435
21 18 433 436
22 15 431 432
23 16 431 433
24 16 431 440
25 17 443 444
26 17 443 445
27 20 443 446
28 17 440 441
29 17 440 442
30 20 440 443
31 19 449 450
32 19 449 451
33 19 449 452
34 17 446 447
35 17 446 448
36 18 446 449
37 19 243 244
38 19 243 245
39 19 243 246
40 19 50 51
41 19 50 52
42 19 50 53
43 17 47 48
44 17 47 49
45 18 47 50
46 17 200 201
47 17 200 202
48 18 200 203
49 17 194 195
50 17 194 196
51 20 194 197
52 38 185 186
53 39 185 187
54 39 185 194
55 17 197 198
56 17 197 199
57 20 197 200
58 34 180 181
59 35 180 182
60 19 203 204
61 19 203 205
62 19 203 206
63 33 179 181
64 19 166 167
65 19 166 168
66 19 166 169
67 17 163 164
68 17 163 165
69 18 163 166
70 27 174 175
71 28 174 181
72 17 160 161
73 17 160 162
74 20 160 163
75 12 144 145
76 5 9 12
77 6 9 14
78 17 60 61
79 17 60 62
80 18 60 63
81 17 54 55
82 17 54 56
83 20 54 57
84 17 57 58
85 17 57 59
86 20 57 60
87 12 41 42
88 7 10 12
89 9 10 41
90 13 42 43
91 13 42 44
92 14 42 45
93 15 45 46
94 16 45 47
95 16 45 54
96 10 5 6
97 8 5 10
98 1 1 2
99 2 1 5
100 3 2 3
101 4 2 1237
102 19 190 191
103 19 190 192
104 19 190 193
105 17 187 188
106 17 187 189
107 18 187 190
108 36 182 183
109 36 182 184
110 37 182 185
111 17 157 158
112 17 157 159
113 20 157 160
114 17 150 151
115 17 150 152
116 18 150 153
117 15 148 149
118 16 148 150
119 16 148 157
120 13 145 146
121 13 145 147
122 14 145 148
123 19 153 154
124 19 153 155
125 19 153 156
126 5 3 6
127 6 3 13
128 17 28 29
129 17 28 30
130 20 28 31
131 19 37 38
132 19 37 39
133 19 37 40
134 17 34 35
135 17 34 36
136 18 34 37
137 33 488 490
138 34 489 490
139 35 489 491
140 27 483 484
141 28 483 490
142 19 552 553
143 19 552 554
144 19 552 555
145 17 549 550
146 17 549 551
147 18 549 552
148 17 543 544
149 17 543 545
150 20 543 546
151 17 546 547
152 17 546 548
153 20 546 549
154 29 484 485
155 30 484 487
156 17 503 504
157 17 503 505
158 20 503 506
159 17 506 507
160 17 506 508
161 20 506 509
162 17 509 510
163 17 509 511
164 18 509 512
165 26 482 483
166 19 512 513
167 19 512 514
168 19 512 515
169 31 485 486
170 32 486 517
171 1 419 420
172 2 419 423
173 24 481 482
174 25 481 485
175 23 480 481
176 3 420 421
177 11 420 480
178 24 275 276
179 25 275 279
180 21 479 480
181 22 479 486
182 5 421 424
183 6 421 426
184 38 391 392
185 39 391 393
186 39 391 400
187 13 428 429
188 13 428 430
189 14 428 431
190 17 393 394
191 17 393 395
192 18 393 396
193 36 388 389
194 36 388 390
195 37 388 391
196 19 396 397
197 19 396 398
198 19 396 399
199 17 400 401
200 17 400 402
201 20 400 403
202 17 403 404
203 17 403 405
204 20 403 406
205 17 406 407
206 17 406 408
207 18 406 409
208 19 409 410
209 19 409 411
210 19 409 412
211 12 427 428
212 10 423 424
213 5 415 418
214 6 415 425
215 7 416 418
216 8 416 423
217 9 416 427
218 7 422 424
219 9 422 453
220 3 414 415
221 1 413 414
222 2 413 417
223 10 417 418
224 8 417 422
225 34 386 387
226 35 386 388
227 33 385 387
228 29 381 382
229 30 381 384
230 27 380 381
231 28 380 387
232 31 382 383
233 26 379 380
234 32 383 414
235 24 378 379
236 25 378 382
237 23 377 378
238 1 316 317
239 2 316 320
240 19 372 373
241 19 372 374
242 19 372 375
243 21 376 377
244 22 376 383
245 3 317 318
246 11 317 377
247 5 318 321
248 6 318 323
249 17 369 370
250 17 369 371
251 18 369 372
252 17 366 367
253 17 366 368
254 20 366 369
255 17 363 364
256 17 363 365
257 20 363 366
258 19 359 360
259 19 359 361
260 19 359 362
261 17 356 357
262 17 356 358
263 18 356 359
264 15 354 355
265 16 354 356
266 16 354 363
267 19 333 334
268 19 333 335
269 19 333 336
270 17 330 331
271 17 330 332
272 18 330 333
273 17 337 338
274 17 337 339
275 20 337 340
276 15 328 329
277 16 328 330
278 16 328 337
279 13 325 326
280 13 325 327
281 14 325 328
282 10 320 321
283 7 319 321
284 9 319 350
285 12 350 351
286 1 310 311
287 2 310 314
288 3 311 312
289 5 312 315
290 6 312 322
291 12 324 325
292 7 313 315
293 8 313 320
294 9 313 324
295 10 314 315
296 8 314 319
297 32 280 311
298 13 351 352
299 13 351 353
300 14 351 354
301 19 346 347
302 19 346 348
303 19 346 349
304 19 269 270
305 19 269 271
306 19 269 272
307 17 266 267
308 17 266 268
309 18 266 269
310 23 274 275
311 17 31 32
312 17 31 33
313 20 31 34
314 17 263 264
315 17 263 265
316 20 263 266
317 19 230 231
318 19 230 232
319 19 230 233
320 17 227 228
321 17 227 229
322 18 227 230
323 21 273 274
324 22 273 280
325 10 217 218
326 7 216 218
327 9 216 247
328 5 215 218
329 6 215 220
330 7 210 212
331 8 210 217
332 9 210 221
333 13 222 223
334 13 222 224
335 14 222 225
336 12 221 222
337 15 225 226
338 16 225 227
339 16 225 234
340 3 214 215
341 11 214 274
342 1 213 214
343 2 213 217
344 17 237 238
345 17 237 239
346 20 237 240
347 17 240 241
348 17 240 242
349 18 240 243
350 5 209 212
351 6 209 219
352 17 234 235
353 17 234 236
354 20 234 237
355 17 131 132
356 17 131 133
357 20 131 134
358 19 306 307
359 19 306 308
360 19 306 309
361 17 303 304
362 17 303 305
363 18 303 306
364 17 97 98
365 17 97 99
366 18 97 100
367 19 256 257
368 19 256 258
369 19 256 259
370 17 260 261
371 17 260 262
372 20 260 263
373 10 211 212
374 8 211 216
375 12 247 248
376 15 251 252
377 16 251 253
378 16 251 260
379 17 253 254
380 17 253 255
381 18 253 256
382 13 248 249
383 13 248 250
384 14 248 251
385 1 207 208
386 2 207 211
387 29 175 176
388 30 175 178
389 3 208 209
390 31 176 177
391 32 177 208
392 26 173 174
393 5 112 115
394 6 112 117
395 24 172 173
396 25 172 176
397 3 111 112
398 11 111 171
399 23 171 172
400 21 170 171
401 22 170 177
402 17 124 125
403 17 124 126
404 18 124 127
405 1 110 111
406 2 110 114
407 10 114 115
408 5 106 109
409 6 106 116
410 7 107 109
411 8 107 114
412 9 107 118
413 12 118 119
414 15 122 123
415 16 122 124
416 16 122 131
417 13 119 120
418 13 119 121
419 14 119 122
420 7 113 115
421 9 113 144
422 3 105 106
423 10 108 109
424 8 108 113
425 1 104 105
426 2 104 108
427 21 67 68
428 22 67 74
429 32 74 105
430 3 8 9
431 11 8 68
432 33 76 78
433 34 77 78
434 35 77 79
435 29 72 73
436 30 72 75
437 31 73 74
438 27 71 72
439 28 71 78
440 1 7 8
441 2 7 11
442 24 69 70
443 25 69 73
444 23 68 69
445 26 70 71
446 10 11 12
447 7 4 6
448 8 4 11
449 9 4 15
450 13 16 17
451 13 16 18
452 14 16 19
453 15 19 20
454 16 19 21
455 16 19 28
456 19 24 25
457 19 24 26
458 19 24 27
459 17 21 22
460 17 21 23
461 18 21 24
462 12 15 16
463 36 79 80
464 36 79 81
465 37 79 82
466 19 87 88
467 19 87 89
468 19 87 90
469 17 84 85
470 17 84 86
471 18 84 87
472 38 82 83
473 39 82 84
474 39 82 91
475 17 91 92
476 17 91 93
477 20 91 94
478 17 94 95
479 17 94 96
480 20 94 97
481 17 343 344
482 17 343 345
483 18 343 346
484 17 459 460
485 17 459 461
486 18 459 462
487 3 517 518
488 17 340 341
489 17 340 342
490 20 340 343
491 23 583 584
492 12 530 531
493 13 531 532
494 13 531 533
495 14 531 534
496 17 536 537
497 17 536 538
498 18 536 539
499 19 539 540
500 19 539 541
501 19 539 542
502 15 534 535
503 16 534 536
504 16 534 543
505 12 453 454
506 1 522 523
507 2 522 526
508 3 523 524
509 11 523 583
510 5 524 527
511 6 524 529
512 10 526 527
513 7 525 527
514 9 525 556
515 12 556 557
516 13 557 558
517 13 557 559
518 14 557 560
519 7 519 521
520 8 519 526
521 9 519 530
522 10 520 521
523 8 520 525
524 1 516 517
525 2 516 520
526 26 276 277
527 17 572 573
528 17 572 574
529 20 572 575
530 17 569 570
531 17 569 571
532 20 569 572
533 17 575 576
534 17 575 577
535 18 575 578
536 15 560 561
537 16 560 562
538 16 560 569
539 17 562 563
540 17 562 564
541 18 562 565
542 17 472 473
543 17 472 474
544 18 472 475
545 17 469 470
546 17 469 471
547 20 469 472
548 19 475 476
549 19 475 477
550 19 475 478
551 17 466 467
552 17 466 468
553 20 466 469
554 15 457 458
555 16 457 459
556 16 457 466
557 36 1212 1213
558 36 1212 1214
559 37 1212 1215
560 31 279 280
561 19 462 463
562 19 462 464
563 19 462 465
564 17 300 301
565 17 300 302
566 20 300 303
567 19 565 566
568 19 565 567
569 19 565 568
570 38 1215 1216
571 39 1215 1217
572 39 1215 1224
573 19 100 101
574 19 100 102
575 19 100 103
576 19 127 128
577 19 127 129
578 19 127 130
579 33 282 284
580 34 283 284
581 35 283 285
582 36 285 286
583 36 285 287
584 37 285 288
585 27 277 278
586 28 277 284
587 17 297 298
588 17 297 299
589 20 297 300
590 19 293 294
591 19 293 295
592 19 293 296
593 17 290 291
594 17 290 292
595 18 290 293
596 38 288 289
597 39 288 290
598 39 288 297
599 33 1209 1211
600 19 140 141
601 19 140 142
602 19 140 143
603 17 137 138
604 17 137 139
605 18 137 140
606 17 134 135
607 17 134 136
608 20 134 137
609 27 1204 1205
610 28 1204 1211
611 13 454 455
612 13 454 456
613 14 454 457
614 29 278 279
615 30 278 281
616 19 655 656
617 19 655 657
618 19 655 658
619 17 652 653
620 17 652 654
621 18 652 655
622 17 649 650
623 17 649 651
624 20 649 652
625 10 623 624
626 8 623 628
627 1 619 620
628 2 619 623
629 7 628 630
630 9 628 659
631 12 659 660
632 13 660 661
633 13 660 662
634 14 660 663
635 26 585 586
636 7 622 624
637 8 622 629
638 9 622 633
639 21 582 583
640 22 582 589
641 24 584 585
642 25 584 588
643 27 586 587
644 28 586 593
645 29 587 588
646 30 587 590
647 31 588 589
648 32 589 620
649 3 620 621
650 5 621 624
651 6 621 631
652 12 633 634
653 17 599 600
654 17 599 601
655 18 599 602
656 19 602 603
657 19 602 604
658 19 602 605
659 36 594 595
660 36 594 596
661 37 594 597
662 34 592 593
663 35 592 594
664 33 591 593
665 38 597 598
666 39 597 599
667 39 597 606
668 17 606 607
669 17 606 608
670 20 606 609
671 19 681 682
672 19 681 683
673 19 681 684
674 17 675 676
675 17 675 677
676 20 675 678
677 17 678 679
678 17 678 680
679 18 678 681
680 15 663 664
681 16 663 665
682 16 663 672
683 19 668 669
684 19 668 670
685 19 668 671
686 17 665 666
687 17 665 667
688 18 665 668
689 19 578 579
690 19 578 580
691 19 578 581
692 17 646 647
693 17 646 648
694 20 646 649
695 15 637 638
696 16 637 639
697 16 637 646
698 19 642 643
699 19 642 644
700 19 642 645
701 19 771 772
702 19 771 773
703 19 771 774
704 17 768 769
705 17 768 770
706 18 768 771
707 1 722 723
708 2 722 726
709 15 766 767
710 16 766 768
711 16 766 775
712 13 763 764
713 13 763 765
714 14 763 766
715 17 778 779
716 17 778 780
717 20 778 781
718 17 781 782
719 17 781 783
720 18 781 784
721 19 784 785
722 19 784 786
723 19 784 787
724 17 775 776
725 17 775 777
726 20 775 778
727 12 762 763
728 26 688 689
729 10 629 630
730 1 625 626
731 2 625 629
732 5 627 630
733 6 627 632
734 23 686 687
735 3 626 627
736 11 626 686
737 21 685 686
738 22 685 692
739 24 687 688
740 25 687 691
741 32 692 723
742 17 672 673
743 17 672 674
744 20 672 675
745 17 639 640
746 17 639 641
747 18 639 642
748 13 634 635
749 13 634 636
750 14 634 637
751 17 609 610
752 17 609 611
753 20 609 612
754 17 612 613
755 17 612 614
756 18 612 615
757 19 615 616
758 19 615 617
759 19 615 618
760 17 702 703
761 17 702 704
762 18 702 705
763 17 715 716
764 17 715 717
765 18 715 718
766 19 705 706
767 19 705 707
768 19 705 708
769 34 695 696
770 35 695 697
771 36 697 698
772 36 697 699
773 37 697 700
774 17 712 713
775 17 712 714
776 20 712 715
777 38 700 701
778 39 700 702
779 39 700 709
780 17 709 710
781 17 709 711
782 20 709 712
783 19 718 719
784 19 718 720
785 19 718 721
786 23 789 790
787 24 790 791
788 25 790 794
789 10 732 733
790 7 725 727
791 8 725 732
792 9 725 736
793 12 736 737
794 1 728 729
795 2 728 732
796 10 726 727
797 8 726 731
798 7 731 733
799 9 731 762
800 3 729 730
801 11 729 789
802 5 730 733
803 6 730 735
804 13 737 738
805 13 737 739
806 14 737 740
807 3 723 724
808 5 724 727
809 6 724 734
810 27 689 690
811 28 689 696
812 29 690 691
813 30 690 693
814 33 694 696
815 31 691 692
816 21 788 789
817 22 788 795
818 1 825 826
819 2 825 829
820 12 865 866
821 13 866 867
822 13 866 868
823 14 866 869
824 19 874 875
825 19 874 876
826 19 874 877
827 7 834 836
828 9 834 865
829 32 795 826
830 19 887 888
831 19 887 889
832 19 887 890
833 17 884 885
834 17 884 886
835 18 884 887
836 17 881 882
837 17 881 883
838 20 881 884
839 15 869 870
840 16 869 871
841 16 869 878
842 17 878 879
843 17 878 880
844 20 878 881
845 17 871 872
846 17 871 873
847 18 871 874
848 15 946 947
849 16 946 948
850 16 946 955
851 13 943 944
852 13 943 945
853 14 943 946
854 19 951 952
855 19 951 953
856 19 951 954
857 17 948 949
858 17 948 950
859 18 948 951
860 17 958 959
861 17 958 960
862 20 958 961
863 17 955 956
864 17 955 957
865 20 955 958
866 17 961 962
867 17 961 963
868 18 961 964
869 19 964 965
870 19 964 966
871 19 964 967
872 19 821 822
873 19 821 823
874 19 821 824
875 17 818 819
876 17 818 820
877 18 818 821
878 17 815 816
879 17 815 817
880 20 815 818
881 36 800 801
882 36 800 802
883 37 800 803
884 33 797 799
885 27 792 793
886 28 792 799
887 29 793 794
888 30 793 796
889 31 794 795
890 26 791 792
891 34 798 799
892 35 798 800
893 17 812 813
894 17 812 814
895 20 812 815
896 38 803 804
897 39 803 805
898 39 803 812
899 17 752 753
900 17 752 754
901 20 752 755
902 17 755 756
903 17 755 757
904 18 755 758
905 19 758 759
906 19 758 760
907 19 758 761
908 17 749 750
909 17 749 751
910 20 749 752
911 17 805 806
912 17 805 807
913 18 805 808
914 17 742 743
915 17 742 744
916 18 742 745
917 15 740 741
918 16 740 742
919 16 740 749
920 19 745 746
921 19 745 747
922 19 745 748
923 3 826 827
924 5 827 830
925 6 827 837
926 10 829 830
927 8 829 834
928 7 828 830
929 8 828 835
930 9 828 839
931 12 839 840
932 10 835 836
933 13 840 841
934 13 840 842
935 14 840 843
936 15 843 844
937 16 843 845
938 16 843 852
939 17 852 853
940 17 852 854
941 20 852 855
942 17 858 859
943 17 858 860
944 18 858 861
945 19 1117 1118
946 19 1117 1119
947 19 1117 1120
948 19 1054 1055
949 19 1054 1056
950 19 1054 1057
951 5 833 836
952 6 833 838
953 21 891 892
954 22 891 898
955 32 898 929
956 31 897 898
957 23 892 893
958 24 893 894
959 25 893 897
960 3 929 930
961 29 896 897
962 30 896 899
963 1 928 929
964 2 928 932
965 3 832 833
966 11 832 892
967 1 831 832
968 2 831 835
969 27 895 896
970 28 895 902
971 26 894 895
972 34 901 902
973 35 901 903
974 17 915 916
975 17 915 917
976 20 915 918
977 19 924 925
978 19 924 926
979 19 924 927
980 17 921 922
981 17 921 923
982 18 921 924
983 36 1109 1110
984 36 1109 1111
985 37 1109 1112
986 33 1106 1108
987 27 1101 1102
988 28 1101 1108
989 34 1107 1108
990 35 1107 1109
991 17 1061 1062
992 17 1061 1063
993 20 1061 1064
994 17 1064 1065
995 17 1064 1066
996 18 1064 1067
997 17 1058 1059
998 17 1058 1060
999 20 1058 1061
1000 15 1049 1050
1001 16 1049 1051
1002 16 1049 1058
1003 19 1067 1068
1004 19 1067 1069
1005 19 1067 1070
1006 1 1037 1038
1007 2 1037 1041
1008 26 1100 1101
1009 13 1046 1047
1010 13 1046 1048
1011 14 1046 1049
1012 12 1045 1046
1013 17 1114 1115
1014 17 1114 1116
1015 18 1114 1117
1016 17 1051 1052
1017 17 1051 1053
1018 18 1051 1054
1019 7 1034 1036
1020 8 1034 1041
1021 9 1034 1045
1022 5 1033 1036
1023 6 1033 1043
1024 3 1032 1033
1025 32 1001 1032
1026 31 1000 1001
1027 12 942 943
1028 7 931 933
1029 8 931 938
1030 9 931 942
1031 7 937 939
1032 9 937 968
1033 12 968 969
1034 21 994 995
1035 22 994 1001
1036 10 938 939
1037 1 934 935
1038 2 934 938
1039 3 935 936
1040 11 935 995
1041 5 936 939
1042 6 936 941
1043 23 995 996
1044 24 996 997
1045 25 996 1000
1046 5 930 933
1047 6 930 940
1048 10 932 933
1049 8 932 937
1050 38 906 907
1051 39 906 908
1052 39 906 915
1053 17 918 919
1054 17 918 920
1055 20 918 921
1056 17 1154 1155
1057 17 1154 1156
1058 18 1154 1157
1059 17 1164 1165
1060 17 1164 1166
1061 20 1164 1167
1062 17 1161 1162
1063 17 1161 1163
1064 20 1161 1164
1065 17 1167 1168
1066 17 1167 1169
1067 18 1167 1170
1068 19 1170 1171
1069 19 1170 1172
1070 19 1170 1173
1071 29 1102 1103
1072 30 1102 1105
1073 31 1103 1104
1074 32 1104 1135
1075 1 1134 1135
1076 2 1134 1138
1077 3 1135 1136
1078 5 1136 1139
1079 6 1136 1146
1080 10 1041 1042
1081 3 1038 1039
1082 11 1038 1098
1083 23 1098 1099
1084 24 1099 1100
1085 25 1099 1103
1086 5 1039 1042
1087 6 1039 1044
1088 21 1097 1098
1089 22 1097 1104
1090 7 1040 1042
1091 9 1040 1071
1092 1 1031 1032
1093 2 1031 1035
1094 10 1035 1036
1095 8 1035 1040
1096 12 1071 1072
1097 13 1072 1073
1098 13 1072 1074
1099 14 1072 1075
1100 15 1075 1076
1101 16 1075 1077
1102 16 1075 1084
1103 17 1084 1085
1104 17 1084 1086
1105 20 1084 1087
1106 19 1080 1081
1107 19 1080 1082
1108 19 1080 1083
1109 17 1077 1078
1110 17 1077 1079
1111 18 1077 1080
1112 19 861 862
1113 19 861 863
1114 19 861 864
1115 19 808 809
1116 19 808 810
1117 19 808 811
1118 17 855 856
1119 17 855 857
1120 20 855 858
1121 17 845 846
1122 17 845 847
1123 18 845 848
1124 19 848 849
1125 19 848 850
1126 19 848 851
1127 19 1157 1158
1128 19 1157 1159
1129 19 1157 1160
1130 38 1112 1113
1131 39 1112 1114
1132 39 1112 1121
1133 19 1130 1131
1134 19 1130 1132
1135 19 1130 1133
1136 17 1121 1122
1137 17 1121 1123
1138 20 1121 1124
1139 17 1124 1125
1140 17 1124 1126
1141 20 1124 1127
1142 17 1127 1128
1143 17 1127 1129
1144 18 1127 1130
1145 29 999 1000
1146 30 999 1002
1147 34 1004 1005
1148 35 1004 1006
1149 17 1018 1019
1150 17 1018 1020
1151 20 1018 1021
1152 38 1009 1010
1153 39 1009 1011
1154 39 1009 1018
1155 17 1024 1025
1156 17 1024 1026
1157 18 1024 1027
1158 17 1021 1022
1159 17 1021 1023
1160 20 1021 1024
1161 17 1011 1012
1162 17 1011 1013
1163 18 1011 1014
1164 36 1006 1007
1165 36 1006 1008
1166 37 1006 1009
1167 26 997 998
1168 27 998 999
1169 28 998 1005
1170 17 987 988
1171 17 987 989
1172 18 987 990
1173 17 981 982
1174 17 981 983
1175 20 981 984
1176 17 984 985
1177 17 984 986
1178 20 984 987
1179 19 990 991
1180 19 990 992
1181 19 990 993
1182 15 972 973
1183 16 972 974
1184 16 972 981
1185 33 1003 1005
1186 13 969 970
1187 13 969 971
1188 14 969 972
1189 19 977 978
1190 19 977 979
1191 19 977 980
1192 17 974 975
1193 17 974 976
1194 18 974 977
1195 33 900 902
1196 36 903 904
1197 36 903 905
1198 37 903 906
1199 17 908 909
1200 17 908 910
1201 18 908 911
1202 19 911 912
1203 19 911 913
1204 19 911 914
1205 15 1152 1153
1206 16 1152 1154
1207 16 1152 1161
1208 13 1149 1150
1209 13 1149 1151
1210 14 1149 1152
1211 17 1230 1231
1212 17 1230 1232
1213 18 1230 1233
1214 19 1233 1234
1215 19 1233 1235
1216 19 1233 1236
1217 17 1224 1225
1218 17 1224 1226
1219 20 1224 1227
1220 17 1227 1228
1221 17 1227 1229
1222 20 1227 1230
1223 10 1138 1139
1224 8 1138 1143
1225 7 1137 1139
1226 8 1137 1144
1227 9 1137 1148
1228 10 1144 1145
1229 12 1148 1149
1230 17 1193 1194
1231 17 1193 1195
1232 18 1193 1196
1233 19 1196 1197
1234 19 1196 1198
1235 19 1196 1199
1236 17 1190 1191
1237 17 1190 1192
1238 20 1190 1193
1239 19 1027 1028
1240 19 1027 1029
1241 19 1027 1030
1242 17 1087 1088
1243 17 1087 1089
1244 20 1087 1090
1245 17 1090 1091
1246 17 1090 1092
1247 18 1090 1093
1248 19 1093 1094
1249 19 1093 1095
1250 19 1093 1096
1251 1 1140 1141
1252 2 1140 1144
1253 21 1200 1201
1254 22 1200 1207
1255 40 1207 1238
1256 23 1201 1202
1257 24 1202 1203
1258 25 1202 1206
1259 31 1206 1207
1260 29 1205 1206
1261 30 1205 1208
1262 26 1203 1204
1263 7 1143 1145
1264 9 1143 1174
1265 12 1174 1175
1266 13 1175 1176
1267 13 1175 1177
1268 14 1175 1178
1269 15 1178 1179
1270 16 1178 1180
1271 16 1178 1187
1272 3 1141 1142
1273 11 1141 1201
1274 5 1142 1145
1275 6 1142 1147
1276 17 1180 1181
1277 17 1180 1182
1278 18 1180 1183
1279 19 1183 1184
1280 19 1183 1185
1281 19 1183 1186
1282 17 1187 1188
1283 17 1187 1189
1284 20 1187 1190
1285 19 1014 1015
1286 19 1014 1016
1287 19 1014 1017
1288 34 1210 1211
1289 35 1210 1212
1290 17 1217 1218
1291 17 1217 1219
1292 18 1217 1220
1293 19 1220 1221
1294 19 1220 1222
1295 19 1220 1223
1296 5 518 521
1297 6 518 528

Angles

1 32 60 63 64
2 32 60 63 65
3 32 60 63 66
4 33 64 63 65
5 33 64 63 66
6 33 65 63 66
7 70 494 496 497
8 70 494 496 498
9 71 494 496 499
10 30 497 496 498
11 31 497 496 499
12 31 498 496 499
13 62 489 491 492
14 62 489 491 493
15 63 489 491 494
16 64 492 491 493
17 65 492 491 494
18 65 493 491 494
19 32 496 499 500
20 32 496 499 501
21 32 496 499 502
22 33 500 499 501
23 33 500 499 502
24 33 501 499 502
25 66 491 494 495
26 67 491 494 496
27 67 491 494 503
28 68 495 494 496
29 68 495 494 503
30 69 496 494 503
31 32 433 436 437
32 32 433 436 438
33 32 433 436 439
34 33 437 436 438
35 33 437 436 439
36 33 438 436 439
37 28 431 433 434
38 28 431 433 435
39 29 431 433 436
40 30 434 433 435
41 31 434 433 436
42 31 435 433 436
43 24 428 431 432
44 25 428 431 433
45 25 428 431 440
46 26 432 431 433
47 26 432 431 440
48 27 433 431 440
49 35 440 443 444
50 35 440 443 445
51 36 440 443 446
52 30 444 443 445
53 35 444 443 446
54 35 445 443 446
55 28 431 440 441
56 28 431 440 442
57 34 431 440 443
58 30 441 440 442
59 35 441 440 443
60 35 442 440 443
61 32 446 449 450
62 32 446 449 451
63 32 446 449 452
64 33 450 449 451
65 33 450 449 452
66 33 451 449 452
67 35 443 446 447
68 35 443 446 448
69 37 443 446 449
70 30 447 446 448
71 31 447 446 449
72 31 448 446 449
73 32 240 243 244
74 32 240 243 245
75 32 240 243 246
76 33 244 243 245
77 33 244 243 246
78 33 245 243 246
79 32 47 50 51
80 32 47 50 52
81 32 47 50 53
82 33 51 50 52
83 33 51 50 53
84 33 52 50 53
85 28 45 47 48
86 28 45 47 49
87 29 45 47 50
88 30 48 47 49
89 31 48 47 50
90 31 49 47 50
91 35 197 200 201
92 35 197 200 202
93 37 197 200 203
94 30 201 200 202
95 31 201 200 203
96 31 202 200 203
97 70 185 194 195
98 70 185 194 196
99 72 185 194 197
100 30 195 194 196
101 35 195 194 197
102 35 196 194 197
103 66 182 185 186
104 67 182 185 187
105 67 182 185 194
106 68 186 185 187
107 68 186 185 194
108 69 187 185 194
109 35 194 197 198
110 35 194 197 199
111 36 194 197 200
112 30 198 197 199
113 35 198 197 200
114 35 199 197 200
115 58 181 180 182
116 32 200 203 204
117 32 200 203 205
118 32 200 203 206
119 33 204 203 205
120 33 204 203 206
121 33 205 203 206
122 59 174 181 179
123 60 174 181 180
124 61 179 181 180
125 32 163 166 167
126 32 163 166 168
127 32 163 166 169
128 33 167 166 168
129 33 167 166 169
130 33 168 166 169
131 35 160 163 164
132 35 160 163 165
133 37 160 163 166
134 30 164 163 165
135 31 164 163 166
136 31 165 163 166
137 46 173 174 175
138 47 173 174 181
139 48 175 174 181
140 35 157 160 161
141 35 157 160 162
142 36 157 160 163
143 30 161 160 162
144 35 161 160 163
145 35 162 160 163
146 19 113 144 145
147 5 8 9 12
148 6 8 9 14
149 7 12 9 14
150 35 57 60 61
151 35 57 60 62
152 37 57 60 63
153 30 61 60 62
154 31 61 60 63
155 31 62 60 63
156 28 45 54 55
157 28 45 54 56
158 34 45 54 57
159 30 55 54 56
160 35 55 54 57
161 35 56 54 57
162 35 54 57 58
163 35 54 57 59
164 36 54 57 60
165 30 58 57 59
166 35 58 57 60
167 35 59 57 60
168 19 10 41 42
169 8 5 10 12
170 10 5 10 41
171 9 12 10 41
172 20 41 42 43
173 20 41 42 44
174 21 41 42 45
175 22 43 42 44
176 23 43 42 45
177 23 44 42 45
178 24 42 45 46
179 25 42 45 47
180 25 42 45 54
181 26 46 45 47
182 26 46 45 54
183 27 47 45 54
184 11 1 5 6
185 12 1 5 10
186 13 6 5 10
187 1 2 1 5
188 2 1 2 3
189 3 1 2 1237
190 4 3 2 1237
191 14 9 12 10
192 15 9 12 11
193 16 10 12 11
194 32 187 190 191
195 32 187 190 192
196 32 187 190 193
197 33 191 190 192
198 33 191 190 193
199 33 192 190 193
200 70 185 187 188
201 70 185 187 189
202 71 185 187 190
203 30 188 187 189
204 31 188 187 190
205 31 189 187 190
206 62 180 182 183
207 62 180 182 184
208 63 180 182 185
209 64 183 182 184
210 65 183 182 185
211 65 184 182 185
212 28 148 157 158
213 28 148 157 159
214 34 148 157 160
215 30 158 157 159
216 35 158 157 160
217 35 159 157 160
218 28 148 150 151
219 28 148 150 152
220 29 148 150 153
221 30 151 150 152
222 31 151 150 153
223 31 152 150 153
224 24 145 148 149
225 25 145 148 150
226 25 145 148 157
227 26 149 148 150
228 26 149 148 157
229 27 150 148 157
230 20 144 145 146
231 20 144 145 147
232 21 144 145 148
233 22 146 145 147
234 23 146 145 148
235 23 147 145 148
236 32 150 153 154
237 32 150 153 155
238 32 150 153 156
239 33 154 153 155
240 33 154 153 156
241 33 155 153 156
242 5 2 3 6
243 6 2 3 13
244 7 6 3 13
245 14 3 6 4
246 15 3 6 5
247 16 4 6 5
248 28 19 28 29
249 28 19 28 30
250 34 19 28 31
251 30 29 28 30
252 35 29 28 31
253 35 30 28 31
254 32 34 37 38
255 32 34 37 39
256 32 34 37 40
257 33 38 37 39
258 33 38 37 40
259 33 39 37 40
260 35 31 34 35
261 35 31 34 36
262 37 31 34 37
263 30 35 34 36
264 31 35 34 37
265 31 36 34 37
266 59 483 490 488
267 60 483 490 489
268 61 488 490 489
269 58 490 489 491
270 46 482 483 484
271 47 482 483 490
272 48 484 483 490
273 32 549 552 553
274 32 549 552 554
275 32 549 552 555
276 33 553 552 554
277 33 553 552 555
278 33 554 552 555
279 35 546 549 550
280 35 546 549 551
281 37 546 549 552
282 30 550 549 551
283 31 550 549 552
284 31 551 549 552
285 28 534 543 544
286 28 534 543 545
287 34 534 543 546
288 30 544 543 545
289 35 544 543 546
290 35 545 543 546
291 35 543 546 547
292 35 543 546 548
293 36 543 546 549
294 30 547 546 548
295 35 547 546 549
296 35 548 546 549
297 49 483 484 485
298 50 483 484 487
299 51 485 484 487
300 70 494 503 504
301 70 494 503 505
302 72 494 503 506
303 30 504 503 505
304 35 504 503 506
305 35 505 503 506
306 35 503 506 507
307 35 503 506 508
308 36 503 506 509
309 30 507 506 508
310 35 507 506 509
311 35 508 506 509
312 35 506 509 510
313 35 506 509 511
314 37 506 509 512
315 30 510 509 511
316 31 510 509 512
317 31 511 509 512
318 45 481 482 483
319 32 509 512 513
320 32 509 512 514
321 32 509 512 515
322 33 513 512 514
323 33 513 512 515
324 33 514 512 515
325 52 481 485 484
326 53 481 485 486
327 54 484 485 486
328 55 479 486 485
329 56 479 486 517
330 57 485 486 517
331 1 420 419 423
332 42 480 481 482
333 43 480 481 485
334 44 482 481 485
335 39 420 480 479
336 40 420 480 481
337 41 479 480 481
338 2 419 420 421
339 17 419 420 480
340 18 421 420 480
341 42 274 275 276
342 43 274 275 279
343 44 276 275 279
344 38 480 479 486
345 5 420 421 424
346 6 420 421 426
347 7 424 421 426
348 66 388 391 392
349 67 388 391 393
350 67 388 391 400
351 68 392 391 393
352 68 392 391 400
353 69 393 391 400
354 20 427 428 429
355 20 427 428 430
356 21 427 428 431
357 22 429 428 430
358 23 429 428 431
359 23 430 428 431
360 70 391 393 394
361 70 391 393 395
362 71 391 393 396
363 30 394 393 395
364 31 394 393 396
365 31 395 393 396
366 62 386 388 389
367 62 386 388 390
368 63 386 388 391
369 64 389 388 390
370 65 389 388 391
371 65 390 388 391
372 32 393 396 397
373 32 393 396 398
374 32 393 396 399
375 33 397 396 398
376 33 397 396 399
377 33 398 396 399
378 70 391 400 401
379 70 391 400 402
380 72 391 400 403
381 30 401 400 402
382 35 401 400 403
383 35 402 400 403
384 35 400 403 404
385 35 400 403 405
386 36 400 403 406
387 30 404 403 405
388 35 404 403 406
389 35 405 403 406
390 35 403 406 407
391 35 403 406 408
392 37 403 406 409
393 30 407 406 408
394 31 407 406 409
395 31 408 406 409
396 32 406 409 410
397 32 406 409 411
398 32 406 409 412
399 33 410 409 411
400 33 410 409 412
401 33 411 409 412
402 19 416 427 428
403 12 416 423 419
404 13 416 423 424
405 11 419 423 424
406 14 421 424 422
407 15 421 424 423
408 16 422 424 423
409 5 414 415 418
410 6 414 415 425
411 7 418 415 425
412 8 418 416 423
413 9 418 416 427
414 10 423 416 427
415 14 415 418 416
416 15 415 418 417
417 16 416 418 417
418 8 417 422 424
419 10 417 422 453
420 9 424 422 453
421 73 383 414 413
422 74 383 414 415
423 2 413 414 415
424 1 414 413 417
425 11 413 417 418
426 12 413 417 422
427 13 418 417 422
428 58 387 386 388
429 49 380 381 382
430 50 380 381 384
431 51 382 381 384
432 59 380 387 385
433 60 380 387 386
434 61 385 387 386
435 46 379 380 381
436 47 379 380 387
437 48 381 380 387
438 52 378 382 381
439 53 378 382 383
440 54 381 382 383
441 45 378 379 380
442 55 376 383 382
443 56 376 383 414
444 57 382 383 414
445 42 377 378 379
446 43 377 378 382
447 44 379 378 382
448 39 317 377 376
449 40 317 377 378
450 41 376 377 378
451 1 317 316 320
452 32 369 372 373
453 32 369 372 374
454 32 369 372 375
455 33 373 372 374
456 33 373 372 375
457 33 374 372 375
458 38 377 376 383
459 2 316 317 318
460 17 316 317 377
461 18 318 317 377
462 5 317 318 321
463 6 317 318 323
464 7 321 318 323
465 14 318 321 319
466 15 318 321 320
467 16 319 321 320
468 35 366 369 370
469 35 366 369 371
470 37 366 369 372
471 30 370 369 371
472 31 370 369 372
473 31 371 369 372
474 35 363 366 367
475 35 363 366 368
476 36 363 366 369
477 30 367 366 368
478 35 367 366 369
479 35 368 366 369
480 28 354 363 364
481 28 354 363 365
482 34 354 363 366
483 30 364 363 365
484 35 364 363 366
485 35 365 363 366
486 32 356 359 360
487 32 356 359 361
488 32 356 359 362
489 33 360 359 361
490 33 360 359 362
491 33 361 359 362
492 28 354 356 357
493 28 354 356 358
494 29 354 356 359
495 30 357 356 358
496 31 357 356 359
497 31 358 356 359
498 24 351 354 355
499 25 351 354 356
500 25 351 354 363
501 26 355 354 356
502 26 355 354 363
503 27 356 354 363
504 32 330 333 334
505 32 330 333 335
506 32 330 333 336
507 33 334 333 335
508 33 334 333 336
509 33 335 333 336
510 28 328 330 331
511 28 328 330 332
512 29 328 330 333
513 30 331 330 332
514 31 331 330 333
515 31 332 330 333
516 28 328 337 338
517 28 328 337 339
518 34 328 337 340
519 30 338 337 339
520 35 338 337 340
521 35 339 337 340
522 24 325 328 329
523 25 325 328 330
524 25 325 328 337
525 26 329 328 330
526 26 329 328 337
527 27 330 328 337
528 20 324 325 326
529 20 324 325 327
530 21 324 325 328
531 22 326 325 327
532 23 326 325 328
533 23 327 325 328
534 12 313 320 316
535 13 313 320 321
536 11 316 320 321
537 8 314 319 321
538 10 314 319 350
539 9 321 319 350
540 19 319 350 351
541 1 311 310 314
542 73 280 311 310
543 74 280 311 312
544 2 310 311 312
545 5 311 312 315
546 6 311 312 322
547 7 315 312 322
548 19 313 324 325
549 8 315 313 320
550 9 315 313 324
551 10 320 313 324
552 11 310 314 315
553 12 310 314 319
554 13 315 314 319
555 14 312 315 313
556 15 312 315 314
557 16 313 315 314
558 55 273 280 279
559 56 273 280 311
560 57 279 280 311
561 20 350 351 352
562 20 350 351 353
563 21 350 351 354
564 22 352 351 353
565 23 352 351 354
566 23 353 351 354
567 32 343 346 347
568 32 343 346 348
569 32 343 346 349
570 33 347 346 348
571 33 347 346 349
572 33 348 346 349
573 32 266 269 270
574 32 266 269 271
575 32 266 269 272
576 33 270 269 271
577 33 270 269 272
578 33 271 269 272
579 35 263 266 267
580 35 263 266 268
581 37 263 266 269
582 30 267 266 268
583 31 267 266 269
584 31 268 266 269
585 39 214 274 273
586 40 214 274 275
587 41 273 274 275
588 35 28 31 32
589 35 28 31 33
590 36 28 31 34
591 30 32 31 33
592 35 32 31 34
593 35 33 31 34
594 35 260 263 264
595 35 260 263 265
596 36 260 263 266
597 30 264 263 265
598 35 264 263 266
599 35 265 263 266
600 32 227 230 231
601 32 227 230 232
602 32 227 230 233
603 33 231 230 232
604 33 231 230 233
605 33 232 230 233
606 28 225 227 228
607 28 225 227 229
608 29 225 227 230
609 30 228 227 229
610 31 228 227 230
611 31 229 227 230
612 38 274 273 280
613 14 215 218 216
614 15 215 218 217
615 16 216 218 217
616 12 210 217 213
617 13 210 217 218
618 11 213 217 218
619 8 211 216 218
620 10 211 216 247
621 9 218 216 247
622 5 214 215 218
623 6 214 215 220
624 7 218 215 220
625 8 212 210 217
626 9 212 210 221
627 10 217 210 221
628 14 209 212 210
629 15 209 212 211
630 16 210 212 211
631 20 221 222 223
632 20 221 222 224
633 21 221 222 225
634 22 223 222 224
635 23 223 222 225
636 23 224 222 225
637 19 210 221 222
638 24 222 225 226
639 25 222 225 227
640 25 222 225 234
641 26 226 225 227
642 26 226 225 234
643 27 227 225 234
644 2 213 214 215
645 17 213 214 274
646 18 215 214 274
647 1 214 213 217
648 35 234 237 238
649 35 234 237 239
650 36 234 237 240
651 30 238 237 239
652 35 238 237 240
653 35 239 237 240
654 35 237 240 241
655 35 237 240 242
656 37 237 240 243
657 30 241 240 242
658 31 241 240 243
659 31 242 240 243
660 5 208 209 212
661 6 208 209 219
662 7 212 209 219
663 28 225 234 235
664 28 225 234 236
665 34 225 234 237
666 30 235 234 236
667 35 235 234 237
668 35 236 234 237
669 28 122 131 132
670 28 122 131 133
671 34 122 131 134
672 30 132 131 133
673 35 132 131 134
674 35 133 131 134
675 32 303 306 307
676 32 303 306 308
677 32 303 306 309
678 33 307 306 308
679 33 307 306 309
680 33 308 306 309
681 35 300 303 304
682 35 300 303 305
683 37 300 303 306
684 30 304 303 305
685 31 304 303 306
686 31 305 303 306
687 35 94 97 98
688 35 94 97 99
689 37 94 97 100
690 30 98 97 99
691 31 98 97 100
692 31 99 97 100
693 32 253 256 257
694 32 253 256 258
695 32 253 256 259
696 33 257 256 258
697 33 257 256 259
698 33 258 256 259
699 28 251 260 261
700 28 251 260 262
701 34 251 260 263
702 30 261 260 262
703 35 261 260 263
704 35 262 260 263
705 11 207 211 212
706 12 207 211 216
707 13 212 211 216
708 19 216 247 248
709 24 248 251 252
710 25 248 251 253
711 25 248 251 260
712 26 252 251 253
713 26 252 251 260
714 27 253 251 260
715 28 251 253 254
716 28 251 253 255
717 29 251 253 256
718 30 254 253 255
719 31 254 253 256
720 31 255 253 256
721 20 247 248 249
722 20 247 248 250
723 21 247 248 251
724 22 249 248 250
725 23 249 248 251
726 23 250 248 251
727 1 208 207 211
728 49 174 175 176
729 50 174 175 178
730 51 176 175 178
731 73 177 208 207
732 74 177 208 209
733 2 207 208 209
734 52 172 176 175
735 53 172 176 177
736 54 175 176 177
737 55 170 177 176
738 56 170 177 208
739 57 176 177 208
740 45 172 173 174
741 5 111 112 115
742 6 111 112 117
743 7 115 112 117
744 42 171 172 173
745 43 171 172 176
746 44 173 172 176
747 2 110 111 112
748 17 110 111 171
749 18 112 111 171
750 39 111 171 170
751 40 111 171 172
752 41 170 171 172
753 38 171 170 177
754 28 122 124 125
755 28 122 124 126
756 29 122 124 127
757 30 125 124 126
758 31 125 124 127
759 31 126 124 127
760 14 112 115 113
761 15 112 115 114
762 16 113 115 114
763 1 111 110 114
764 12 107 114 110
765 13 107 114 115
766 11 110 114 115
767 14 106 109 107
768 15 106 109 108
769 16 107 109 108
770 5 105 106 109
771 6 105 106 116
772 7 109 106 116
773 8 109 107 114
774 9 109 107 118
775 10 114 107 118
776 19 107 118 119
777 24 119 122 123
778 25 119 122 124
779 25 119 122 131
780 26 123 122 124
781 26 123 122 131
782 27 124 122 131
783 20 118 119 120
784 20 118 119 121
785 21 118 119 122
786 22 120 119 121
787 23 120 119 122
788 23 121 119 122
789 8 108 113 115
790 10 108 113 144
791 9 115 113 144
792 73 74 105 104
793 74 74 105 106
794 2 104 105 106
795 11 104 108 109
796 12 104 108 113
797 13 109 108 113
798 1 105 104 108
799 38 68 67 74
800 55 67 74 73
801 56 67 74 105
802 57 73 74 105
803 2 7 8 9
804 17 7 8 68
805 18 9 8 68
806 58 78 77 79
807 49 71 72 73
808 50 71 72 75
809 51 73 72 75
810 52 69 73 72
811 53 69 73 74
812 54 72 73 74
813 46 70 71 72
814 47 70 71 78
815 48 72 71 78
816 59 71 78 76
817 60 71 78 77
818 61 76 78 77
819 1 8 7 11
820 42 68 69 70
821 43 68 69 73
822 44 70 69 73
823 39 8 68 67
824 40 8 68 69
825 41 67 68 69
826 45 69 70 71
827 12 4 11 7
828 13 4 11 12
829 11 7 11 12
830 8 6 4 11
831 9 6 4 15
832 10 11 4 15
833 20 15 16 17
834 20 15 16 18
835 21 15 16 19
836 22 17 16 18
837 23 17 16 19
838 23 18 16 19
839 24 16 19 20
840 25 16 19 21
841 25 16 19 28
842 26 20 19 21
843 26 20 19 28
844 27 21 19 28
845 32 21 24 25
846 32 21 24 26
847 32 21 24 27
848 33 25 24 26
849 33 25 24 27
850 33 26 24 27
851 28 19 21 22
852 28 19 21 23
853 29 19 21 24
854 30 22 21 23
855 31 22 21 24
856 31 23 21 24
857 19 4 15 16
858 62 77 79 80
859 62 77 79 81
860 63 77 79 82
861 64 80 79 81
862 65 80 79 82
863 65 81 79 82
864 32 84 87 88
865 32 84 87 89
866 32 84 87 90
867 33 88 87 89
868 33 88 87 90
869 33 89 87 90
870 70 82 84 85
871 70 82 84 86
872 71 82 84 87
873 30 85 84 86
874 31 85 84 87
875 31 86 84 87
876 66 79 82 83
877 67 79 82 84
878 67 79 82 91
879 68 83 82 84
880 68 83 82 91
881 69 84 82 91
882 70 82 91 92
883 70 82 91 93
884 72 82 91 94
885 30 92 91 93
886 35 92 91 94
887 35 93 91 94
888 35 91 94 95
889 35 91 94 96
890 36 91 94 97
891 30 95 94 96
892 35 95 94 97
893 35 96 94 97
894 35 340 343 344
895 35 340 343 345
896 37 340 343 346
897 30 344 343 345
898 31 344 343 346
899 31 345 343 346
900 28 457 459 460
901 28 457 459 461
902 29 457 459 462
903 30 460 459 461
904 31 460 459 462
905 31 461 459 462
906 73 486 517 516
907 74 486 517 518
908 2 516 517 518
909 35 337 340 341
910 35 337 340 342
911 36 337 340 343
912 30 341 340 342
913 35 341 340 343
914 35 342 340 343
915 39 523 583 582
916 40 523 583 584
917 41 582 583 584
918 19 519 530 531
919 20 530 531 532
920 20 530 531 533
921 21 530 531 534
922 22 532 531 533
923 23 532 531 534
924 23 533 531 534
925 28 534 536 537
926 28 534 536 538
927 29 534 536 539
928 30 537 536 538
929 31 537 536 539
930 31 538 536 539
931 32 536 539 540
932 32 536 539 541
933 32 536 539 542
934 33 540 539 541
935 33 540 539 542
936 33 541 539 542
937 24 531 534 535
938 25 531 534 536
939 25 531 534 543
940 26 535 534 536
941 26 535 534 543
942 27 536 534 543
943 19 422 453 454
944 1 523 522 526
945 2 522 523 524
946 17 522 523 583
947 18 524 523 583
948 5 523 524 527
949 6 523 524 529
950 7 527 524 529
951 14 524 527 525
952 15 524 527 526
953 16 525 527 526
954 12 519 526 522
955 13 519 526 527
956 11 522 526 527
957 8 520 525 527
958 10 520 525 556
959 9 527 525 556
960 19 525 556 557
961 20 556 557 558
962 20 556 557 559
963 21 556 557 560
964 22 558 557 559
965 23 558 557 560
966 23 559 557 560
967 8 521 519 526
968 9 521 519 530
969 10 526 519 530
970 14 518 521 519
971 15 518 521 520
972 16 519 521 520
973 11 516 520 521
974 12 516 520 525
975 13 521 520 525
976 1 517 516 520
977 45 275 276 277
978 35 569 572 573
979 35 569 572 574
980 36 569 572 575
981 30 573 572 574
982 35 573 572 575
983 35 574 572 575
984 28 560 569 570
985 28 560 569 571
986 34 560 569 572
987 30 570 569 571
988 35 570 569 572
989 35 571 569 572
990 35 572 575 576
991 35 572 575 577
992 37 572 575 578
993 30 576 575 577
994 31 576 575 578
995 31 577 575 578
996 24 557 560 561
997 25 557 560 562
998 25 557 560 569
999 26 561 560 562
1000 26 561 560 569
1001 27 562 560 569
1002 28 560 562 563
1003 28 560 562 564
1004 29 560 562 565
1005 30 563 562 564
1006 31 563 562 565
1007 31 564 562 565
1008 35 469 472 473
1009 35 469 472 474
1010 37 469 472 475
1011 30 473 472 474
1012 31 473 472 475
1013 31 474 472 475
1014 35 466 469 470
1015 35 466 469 471
1016 36 466 469 472
1017 30 470 469 471
1018 35 470 469 472
1019 35 471 469 472
1020 32 472 475 476
1021 32 472 475 477
1022 32 472 475 478
1023 33 476 475 477
1024 33 476 475 478
1025 33 477 475 478
1026 28 457 466 467
1027 28 457 466 468
1028 34 457 466 469
1029 30 467 466 468
1030 35 467 466 469
1031 35 468 466 469
1032 24 454 457 458
1033 25 454 457 459
1034 25 454 457 466
1035 26 458 457 459
1036 26 458 457 466
1037 27 459 457 466
1038 62 1210 1212 1213
1039 62 1210 1212 1214
1040 63 1210 1212 1215
1041 64 1213 1212 1214
1042 65 1213 1212 1215
1043 65 1214 1212 1215
1044 52 275 279 278
1045 53 275 279 280
1046 54 278 279 280
1047 32 459 462 463
1048 32 459 462 464
1049 32 459 462 465
1050 33 463 462 464
1051 33 463 462 465
1052 33 464 462 465
1053 35 297 300 301
1054 35 297 300 302
1055 36 297 300 303
1056 30 301 300 302
1057 35 301 300 303
1058 35 302 300 303
1059 32 562 565 566
1060 32 562 565 567
1061 32 562 565 568
1062 33 566 565 567
1063 33 566 565 568
1064 33 567 565 568
1065 66 1212 1215 1216
1066 67 1212 1215 1217
1067 67 1212 1215 1224
1068 68 1216 1215 1217
1069 68 1216 1215 1224
1070 69 1217 1215 1224
1071 32 97 100 101
1072 32 97 100 102
1073 32 97 100 103
1074 33 101 100 102
1075 33 101 100 103
1076 33 102 100 103
1077 32 124 127 128
1078 32 124 127 129
1079 32 124 127 130
1080 33 128 127 129
1081 33 128 127 130
1082 33 129 127 130
1083 58 284 283 285
1084 62 283 285 286
1085 62 283 285 287
1086 63 283 285 288
1087 64 286 285 287
1088 65 286 285 288
1089 65 287 285 288
1090 59 277 284 282
1091 60 277 284 283
1092 61 282 284 283
1093 46 276 277 278
1094 47 276 277 284
1095 48 278 277 284
1096 70 288 297 298
1097 70 288 297 299
1098 72 288 297 300
1099 30 298 297 299
1100 35 298 297 300
1101 35 299 297 300
1102 32 290 293 294
1103 32 290 293 295
1104 32 290 293 296
1105 33 294 293 295
1106 33 294 293 296
1107 33 295 293 296
1108 70 288 290 291
1109 70 288 290 292
1110 71 288 290 293
1111 30 291 290 292
1112 31 291 290 293
1113 31 292 290 293
1114 66 285 288 289
1115 67 285 288 290
1116 67 285 288 297
1117 68 289 288 290
1118 68 289 288 297
1119 69 290 288 297
1120 32 137 140 141
1121 32 137 140 142
1122 32 137 140 143
1123 33 141 140 142
1124 33 141 140 143
1125 33 142 140 143
1126 35 134 137 138
1127 35 134 137 139
1128 37 134 137 140
1129 30 138 137 139
1130 31 138 137 140
1131 31 139 137 140
1132 35 131 134 135
1133 35 131 134 136
1134 36 131 134 137
1135 30 135 134 136
1136 35 135 134 137
1137 35 136 134 137
1138 46 1203 1204 1205
1139 47 1203 1204 1211
1140 48 1205 1204 1211
1141 20 453 454 455
1142 20 453 454 456
1143 21 453 454 457
1144 22 455 454 456
1145 23 455 454 457
1146 23 456 454 457
1147 49 277 278 279
1148 50 277 278 281
1149 51 279 278 281
1150 59 1204 1211 1209
1151 60 1204 1211 1210
1152 61 1209 1211 1210
1153 32 652 655 656
1154 32 652 655 657
1155 32 652 655 658
1156 33 656 655 657
1157 33 656 655 658
1158 33 657 655 658
1159 35 649 652 653
1160 35 649 652 654
1161 37 649 652 655
1162 30 653 652 654
1163 31 653 652 655
1164 31 654 652 655
1165 35 646 649 650
1166 35 646 649 651
1167 36 646 649 652
1168 30 650 649 651
1169 35 650 649 652
1170 35 651 649 652
1171 11 619 623 624
1172 12 619 623 628
1173 13 624 623 628
1174 1 620 619 623
1175 8 623 628 630
1176 10 623 628 659
1177 9 630 628 659
1178 19 628 659 660
1179 20 659 660 661
1180 20 659 660 662
1181 21 659 660 663
1182 22 661 660 662
1183 23 661 660 663
1184 23 662 660 663
1185 45 584 585 586
1186 8 624 622 629
1187 9 624 622 633
1188 10 629 622 633
1189 38 583 582 589
1190 42 583 584 585
1191 43 583 584 588
1192 44 585 584 588
1193 46 585 586 587
1194 47 585 586 593
1195 48 587 586 593
1196 49 586 587 588
1197 50 586 587 590
1198 51 588 587 590
1199 52 584 588 587
1200 53 584 588 589
1201 54 587 588 589
1202 55 582 589 588
1203 56 582 589 620
1204 57 588 589 620
1205 73 589 620 619
1206 74 589 620 621
1207 2 619 620 621
1208 14 621 624 622
1209 15 621 624 623
1210 16 622 624 623
1211 5 620 621 624
1212 6 620 621 631
1213 7 624 621 631
1214 19 622 633 634
1215 59 586 593 591
1216 60 586 593 592
1217 61 591 593 592
1218 70 597 599 600
1219 70 597 599 601
1220 71 597 599 602
1221 30 600 599 601
1222 31 600 599 602
1223 31 601 599 602
1224 32 599 602 603
1225 32 599 602 604
1226 32 599 602 605
1227 33 603 602 604
1228 33 603 602 605
1229 33 604 602 605
1230 62 592 594 595
1231 62 592 594 596
1232 63 592 594 597
1233 64 595 594 596
1234 65 595 594 597
1235 65 596 594 597
1236 58 593 592 594
1237 66 594 597 598
1238 67 594 597 599
1239 67 594 597 606
1240 68 598 597 599
1241 68 598 597 606
1242 69 599 597 606
1243 70 597 606 607
1244 70 597 606 608
1245 72 597 606 609
1246 30 607 606 608
1247 35 607 606 609
1248 35 608 606 609
1249 32 678 681 682
1250 32 678 681 683
1251 32 678 681 684
1252 33 682 681 683
1253 33 682 681 684
1254 33 683 681 684
1255 35 672 675 676
1256 35 672 675 677
1257 36 672 675 678
1258 30 676 675 677
1259 35 676 675 678
1260 35 677 675 678
1261 35 675 678 679
1262 35 675 678 680
1263 37 675 678 681
1264 30 679 678 680
1265 31 679 678 681
1266 31 680 678 681
1267 24 660 663 664
1268 25 660 663 665
1269 25 660 663 672
1270 26 664 663 665
1271 26 664 663 672
1272 27 665 663 672
1273 32 665 668 669
1274 32 665 668 670
1275 32 665 668 671
1276 33 669 668 670
1277 33 669 668 671
1278 33 670 668 671
1279 28 663 665 666
1280 28 663 665 667
1281 29 663 665 668
1282 30 666 665 667
1283 31 666 665 668
1284 31 667 665 668
1285 32 575 578 579
1286 32 575 578 580
1287 32 575 578 581
1288 33 579 578 580
1289 33 579 578 581
1290 33 580 578 581
1291 28 637 646 647
1292 28 637 646 648
1293 34 637 646 649
1294 30 647 646 648
1295 35 647 646 649
1296 35 648 646 649
1297 24 634 637 638
1298 25 634 637 639
1299 25 634 637 646
1300 26 638 637 639
1301 26 638 637 646
1302 27 639 637 646
1303 32 639 642 643
1304 32 639 642 644
1305 32 639 642 645
1306 33 643 642 644
1307 33 643 642 645
1308 33 644 642 645
1309 32 768 771 772
1310 32 768 771 773
1311 32 768 771 774
1312 33 772 771 773
1313 33 772 771 774
1314 33 773 771 774
1315 28 766 768 769
1316 28 766 768 770
1317 29 766 768 771
1318 30 769 768 770
1319 31 769 768 771
1320 31 770 768 771
1321 1 723 722 726
1322 24 763 766 767
1323 25 763 766 768
1324 25 763 766 775
1325 26 767 766 768
1326 26 767 766 775
1327 27 768 766 775
1328 20 762 763 764
1329 20 762 763 765
1330 21 762 763 766
1331 22 764 763 765
1332 23 764 763 766
1333 23 765 763 766
1334 35 775 778 779
1335 35 775 778 780
1336 36 775 778 781
1337 30 779 778 780
1338 35 779 778 781
1339 35 780 778 781
1340 35 778 781 782
1341 35 778 781 783
1342 37 778 781 784
1343 30 782 781 783
1344 31 782 781 784
1345 31 783 781 784
1346 32 781 784 785
1347 32 781 784 786
1348 32 781 784 787
1349 33 785 784 786
1350 33 785 784 787
1351 33 786 784 787
1352 28 766 775 776
1353 28 766 775 777
1354 34 766 775 778
1355 30 776 775 777
1356 35 776 775 778
1357 35 777 775 778
1358 19 731 762 763
1359 45 687 688 689
1360 12 622 629 625
1361 13 622 629 630
1362 11 625 629 630
1363 14 627 630 628
1364 15 627 630 629
1365 16 628 630 629
1366 1 626 625 629
1367 5 626 627 630
1368 6 626 627 632
1369 7 630 627 632
1370 39 626 686 685
1371 40 626 686 687
1372 41 685 686 687
1373 2 625 626 627
1374 17 625 626 686
1375 18 627 626 686
1376 38 686 685 692
1377 42 686 687 688
1378 43 686 687 691
1379 44 688 687 691
1380 55 685 692 691
1381 56 685 692 723
1382 57 691 692 723
1383 28 663 672 673
1384 28 663 672 674
1385 34 663 672 675
1386 30 673 672 674
1387 35 673 672 675
1388 35 674 672 675
1389 28 637 639 640
1390 28 637 639 641
1391 29 637 639 642
1392 30 640 639 641
1393 31 640 639 642
1394 31 641 639 642
1395 20 633 634 635
1396 20 633 634 636
1397 21 633 634 637
1398 22 635 634 636
1399 23 635 634 637
1400 23 636 634 637
1401 35 606 609 610
1402 35 606 609 611
1403 36 606 609 612
1404 30 610 609 611
1405 35 610 609 612
1406 35 611 609 612
1407 35 609 612 613
1408 35 609 612 614
1409 37 609 612 615
1410 30 613 612 614
1411 31 613 612 615
1412 31 614 612 615
1413 32 612 615 616
1414 32 612 615 617
1415 32 612 615 618
1416 33 616 615 617
1417 33 616 615 618
1418 33 617 615 618
1419 59 689 696 694
1420 60 689 696 695
1421 61 694 696 695
1422 70 700 702 703
1423 70 700 702 704
1424 71 700 702 705
1425 30 703 702 704
1426 31 703 702 705
1427 31 704 702 705
1428 35 712 715 716
1429 35 712 715 717
1430 37 712 715 718
1431 30 716 715 717
1432 31 716 715 718
1433 31 717 715 718
1434 32 702 705 706
1435 32 702 705 707
1436 32 702 705 708
1437 33 706 705 707
1438 33 706 705 708
1439 33 707 705 708
1440 58 696 695 697
1441 62 695 697 698
1442 62 695 697 699
1443 63 695 697 700
1444 64 698 697 699
1445 65 698 697 700
1446 65 699 697 700
1447 35 709 712 713
1448 35 709 712 714
1449 36 709 712 715
1450 30 713 712 714
1451 35 713 712 715
1452 35 714 712 715
1453 66 697 700 701
1454 67 697 700 702
1455 67 697 700 709
1456 68 701 700 702
1457 68 701 700 709
1458 69 702 700 709
1459 70 700 709 710
1460 70 700 709 711
1461 72 700 709 712
1462 30 710 709 711
1463 35 710 709 712
1464 35 711 709 712
1465 32 715 718 719
1466 32 715 718 720
1467 32 715 718 721
1468 33 719 718 720
1469 33 719 718 721
1470 33 720 718 721
1471 39 729 789 788
1472 40 729 789 790
1473 41 788 789 790
1474 42 789 790 791
1475 43 789 790 794
1476 44 791 790 794
1477 12 725 732 728
1478 13 725 732 733
1479 11 728 732 733
1480 8 727 725 732
1481 9 727 725 736
1482 10 732 725 736
1483 14 724 727 725
1484 15 724 727 726
1485 16 725 727 726
1486 19 725 736 737
1487 1 729 728 732
1488 11 722 726 727
1489 12 722 726 731
1490 13 727 726 731
1491 14 730 733 731
1492 15 730 733 732
1493 16 731 733 732
1494 8 726 731 733
1495 10 726 731 762
1496 9 733 731 762
1497 2 728 729 730
1498 17 728 729 789
1499 18 730 729 789
1500 5 729 730 733
1501 6 729 730 735
1502 7 733 730 735
1503 20 736 737 738
1504 20 736 737 739
1505 21 736 737 740
1506 22 738 737 739
1507 23 738 737 740
1508 23 739 737 740
1509 73 692 723 722
1510 74 692 723 724
1511 2 722 723 724
1512 5 723 724 727
1513 6 723 724 734
1514 7 727 724 734
1515 46 688 689 690
1516 47 688 689 696
1517 48 690 689 696
1518 49 689 690 691
1519 50 689 690 693
1520 51 691 690 693
1521 52 687 691 690
1522 53 687 691 692
1523 54 690 691 692
1524 38 789 788 795
1525 1 826 825 829
1526 19 834 865 866
1527 20 865 866 867
1528 20 865 866 868
1529 21 865 866 869
1530 22 867 866 868
1531 23 867 866 869
1532 23 868 866 869
1533 32 871 874 875
1534 32 871 874 876
1535 32 871 874 877
1536 33 875 874 876
1537 33 875 874 877
1538 33 876 874 877
1539 8 829 834 836
1540 10 829 834 865
1541 9 836 834 865
1542 55 788 795 794
1543 56 788 795 826
1544 57 794 795 826
1545 32 884 887 888
1546 32 884 887 889
1547 32 884 887 890
1548 33 888 887 889
1549 33 888 887 890
1550 33 889 887 890
1551 35 881 884 885
1552 35 881 884 886
1553 37 881 884 887
1554 30 885 884 886
1555 31 885 884 887
1556 31 886 884 887
1557 35 878 881 882
1558 35 878 881 883
1559 36 878 881 884
1560 30 882 881 883
1561 35 882 881 884
1562 35 883 881 884
1563 24 866 869 870
1564 25 866 869 871
1565 25 866 869 878
1566 26 870 869 871
1567 26 870 869 878
1568 27 871 869 878
1569 28 869 878 879
1570 28 869 878 880
1571 34 869 878 881
1572 30 879 878 880
1573 35 879 878 881
1574 35 880 878 881
1575 28 869 871 872
1576 28 869 871 873
1577 29 869 871 874
1578 30 872 871 873
1579 31 872 871 874
1580 31 873 871 874
1581 24 943 946 947
1582 25 943 946 948
1583 25 943 946 955
1584 26 947 946 948
1585 26 947 946 955
1586 27 948 946 955
1587 20 942 943 944
1588 20 942 943 945
1589 21 942 943 946
1590 22 944 943 945
1591 23 944 943 946
1592 23 945 943 946
1593 32 948 951 952
1594 32 948 951 953
1595 32 948 951 954
1596 33 952 951 953
1597 33 952 951 954
1598 33 953 951 954
1599 28 946 948 949
1600 28 946 948 950
1601 29 946 948 951
1602 30 949 948 950
1603 31 949 948 951
1604 31 950 948 951
1605 35 955 958 959
1606 35 955 958 960
1607 36 955 958 961
1608 30 959 958 960
1609 35 959 958 961
1610 35 960 958 961
1611 28 946 955 956
1612 28 946 955 957
1613 34 946 955 958
1614 30 956 955 957
1615 35 956 955 958
1616 35 957 955 958
1617 35 958 961 962
1618 35 958 961 963
1619 37 958 961 964
1620 30 962 961 963
1621 31 962 961 964
1622 31 963 961 964
1623 32 961 964 965
1624 32 961 964 966
1625 32 961 964 967
1626 33 965 964 966
1627 33 965 964 967
1628 33 966 964 967
1629 32 818 821 822
1630 32 818 821 823
1631 32 818 821 824
1632 33 822 821 823
1633 33 822 821 824
1634 33 823 821 824
1635 35 815 818 819
1636 35 815 818 820
1637 37 815 818 821
1638 30 819 818 820
1639 31 819 818 821
1640 31 820 818 821
1641 35 812 815 816
1642 35 812 815 817
1643 36 812 815 818
1644 30 816 815 817
1645 35 816 815 818
1646 35 817 815 818
1647 62 798 800 801
1648 62 798 800 802
1649 63 798 800 803
1650 64 801 800 802
1651 65 801 800 803
1652 65 802 800 803
1653 46 791 792 793
1654 47 791 792 799
1655 48 793 792 799
1656 59 792 799 797
1657 60 792 799 798
1658 61 797 799 798
1659 49 792 793 794
1660 50 792 793 796
1661 51 794 793 796
1662 52 790 794 793
1663 53 790 794 795
1664 54 793 794 795
1665 45 790 791 792
1666 58 799 798 800
1667 70 803 812 813
1668 70 803 812 814
1669 72 803 812 815
1670 30 813 812 814
1671 35 813 812 815
1672 35 814 812 815
1673 66 800 803 804
1674 67 800 803 805
1675 67 800 803 812
1676 68 804 803 805
1677 68 804 803 812
1678 69 805 803 812
1679 35 749 752 753
1680 35 749 752 754
1681 36 749 752 755
1682 30 753 752 754
1683 35 753 752 755
1684 35 754 752 755
1685 35 752 755 756
1686 35 752 755 757
1687 37 752 755 758
1688 30 756 755 757
1689 31 756 755 758
1690 31 757 755 758
1691 32 755 758 759
1692 32 755 758 760
1693 32 755 758 761
1694 33 759 758 760
1695 33 759 758 761
1696 33 760 758 761
1697 28 740 749 750
1698 28 740 749 751
1699 34 740 749 752
1700 30 750 749 751
1701 35 750 749 752
1702 35 751 749 752
1703 70 803 805 806
1704 70 803 805 807
1705 71 803 805 808
1706 30 806 805 807
1707 31 806 805 808
1708 31 807 805 808
1709 28 740 742 743
1710 28 740 742 744
1711 29 740 742 745
1712 30 743 742 744
1713 31 743 742 745
1714 31 744 742 745
1715 24 737 740 741
1716 25 737 740 742
1717 25 737 740 749
1718 26 741 740 742
1719 26 741 740 749
1720 27 742 740 749
1721 32 742 745 746
1722 32 742 745 747
1723 32 742 745 748
1724 33 746 745 747
1725 33 746 745 748
1726 33 747 745 748
1727 73 795 826 825
1728 74 795 826 827
1729 2 825 826 827
1730 5 826 827 830
1731 6 826 827 837
1732 7 830 827 837
1733 14 827 830 828
1734 15 827 830 829
1735 16 828 830 829
1736 11 825 829 830
1737 12 825 829 834
1738 13 830 829 834
1739 8 830 828 835
1740 9 830 828 839
1741 10 835 828 839
1742 19 828 839 840
1743 12 828 835 831
1744 13 828 835 836
1745 11 831 835 836
1746 20 839 840 841
1747 20 839 840 842
1748 21 839 840 843
1749 22 841 840 842
1750 23 841 840 843
1751 23 842 840 843
1752 14 833 836 834
1753 15 833 836 835
1754 16 834 836 835
1755 24 840 843 844
1756 25 840 843 845
1757 25 840 843 852
1758 26 844 843 845
1759 26 844 843 852
1760 27 845 843 852
1761 28 843 852 853
1762 28 843 852 854
1763 34 843 852 855
1764 30 853 852 854
1765 35 853 852 855
1766 35 854 852 855
1767 35 855 858 859
1768 35 855 858 860
1769 37 855 858 861
1770 30 859 858 860
1771 31 859 858 861
1772 31 860 858 861
1773 32 1114 1117 1118
1774 32 1114 1117 1119
1775 32 1114 1117 1120
1776 33 1118 1117 1119
1777 33 1118 1117 1120
1778 33 1119 1117 1120
1779 32 1051 1054 1055
1780 32 1051 1054 1056
1781 32 1051 1054 1057
1782 33 1055 1054 1056
1783 33 1055 1054 1057
1784 33 1056 1054 1057
1785 5 832 833 836
1786 6 832 833 838
1787 7 836 833 838
1788 38 892 891 898
1789 55 891 898 897
1790 56 891 898 929
1791 57 897 898 929
1792 52 893 897 896
1793 53 893 897 898
1794 54 896 897 898
1795 39 832 892 891
1796 40 832 892 893
1797 41 891 892 893
1798 42 892 893 894
1799 43 892 893 897
1800 44 894 893 897
1801 73 898 929 928
1802 74 898 929 930
1803 2 928 929 930
1804 49 895 896 897
1805 50 895 896 899
1806 51 897 896 899
1807 1 929 928 932
1808 2 831 832 833
1809 17 831 832 892
1810 18 833 832 892
1811 1 832 831 835
1812 46 894 895 896
1813 47 894 895 902
1814 48 896 895 902
1815 45 893 894 895
1816 58 902 901 903
1817 70 906 915 916
1818 70 906 915 917
1819 72 906 915 918
1820 30 916 915 917
1821 35 916 915 918
1822 35 917 915 918
1823 32 921 924 925
1824 32 921 924 926
1825 32 921 924 927
1826 33 925 924 926
1827 33 925 924 927
1828 33 926 924 927
1829 35 918 921 922
1830 35 918 921 923
1831 37 918 921 924
1832 30 922 921 923
1833 31 922 921 924
1834 31 923 921 924
1835 62 1107 1109 1110
1836 62 1107 1109 1111
1837 63 1107 1109 1112
1838 64 1110 1109 1111
1839 65 1110 1109 1112
1840 65 1111 1109 1112
1841 59 1101 1108 1106
1842 60 1101 1108 1107
1843 61 1106 1108 1107
1844 46 1100 1101 1102
1845 47 1100 1101 1108
1846 48 1102 1101 1108
1847 58 1108 1107 1109
1848 35 1058 1061 1062
1849 35 1058 1061 1063
1850 36 1058 1061 1064
1851 30 1062 1061 1063
1852 35 1062 1061 1064
1853 35 1063 1061 1064
1854 35 1061 1064 1065
1855 35 1061 1064 1066
1856 37 1061 1064 1067
1857 30 1065 1064 1066
1858 31 1065 1064 1067
1859 31 1066 1064 1067
1860 28 1049 1058 1059
1861 28 1049 1058 1060
1862 34 1049 1058 1061
1863 30 1059 1058 1060
1864 35 1059 1058 1061
1865 35 1060 1058 1061
1866 24 1046 1049 1050
1867 25 1046 1049 1051
1868 25 1046 1049 1058
1869 26 1050 1049 1051
1870 26 1050 1049 1058
1871 27 1051 1049 1058
1872 32 1064 1067 1068
1873 32 1064 1067 1069
1874 32 1064 1067 1070
1875 33 1068 1067 1069
1876 33 1068 1067 1070
1877 33 1069 1067 1070
1878 1 1038 1037 1041
1879 45 1099 1100 1101
1880 20 1045 1046 1047
1881 20 1045 1046 1048
1882 21 1045 1046 1049
1883 22 1047 1046 1048
1884 23 1047 1046 1049
1885 23 1048 1046 1049
1886 19 1034 1045 1046
1887 70 1112 1114 1115
1888 70 1112 1114 1116
1889 71 1112 1114 1117
1890 30 1115 1114 1116
1891 31 1115 1114 1117
1892 31 1116 1114 1117
1893 28 1049 1051 1052
1894 28 1049 1051 1053
1895 29 1049 1051 1054
1896 30 1052 1051 1053
1897 31 1052 1051 1054
1898 31 1053 1051 1054
1899 8 1036 1034 1041
1900 9 1036 1034 1045
1901 10 1041 1034 1045
1902 5 1032 1033 1036
1903 6 1032 1033 1043
1904 7 1036 1033 1043
1905 73 1001 1032 1031
1906 74 1001 1032 1033
1907 2 1031 1032 1033
1908 14 1033 1036 1034
1909 15 1033 1036 1035
1910 16 1034 1036 1035
1911 55 994 1001 1000
1912 56 994 1001 1032
1913 57 1000 1001 1032
1914 52 996 1000 999
1915 53 996 1000 1001
1916 54 999 1000 1001
1917 19 931 942 943
1918 8 933 931 938
1919 9 933 931 942
1920 10 938 931 942
1921 8 932 937 939
1922 10 932 937 968
1923 9 939 937 968
1924 19 937 968 969
1925 38 995 994 1001
1926 12 931 938 934
1927 13 931 938 939
1928 11 934 938 939
1929 1 935 934 938
1930 2 934 935 936
1931 17 934 935 995
1932 18 936 935 995
1933 14 936 939 937
1934 15 936 939 938
1935 16 937 939 938
1936 5 935 936 939
1937 6 935 936 941
1938 7 939 936 941
1939 39 935 995 994
1940 40 935 995 996
1941 41 994 995 996
1942 42 995 996 997
1943 43 995 996 1000
1944 44 997 996 1000
1945 14 930 933 931
1946 15 930 933 932
1947 16 931 933 932
1948 5 929 930 933
1949 6 929 930 940
1950 7 933 930 940
1951 11 928 932 933
1952 12 928 932 937
1953 13 933 932 937
1954 66 903 906 907
1955 67 903 906 908
1956 67 903 906 915
1957 68 907 906 908
1958 68 907 906 915
1959 69 908 906 915
1960 35 915 918 919
1961 35 915 918 920
1962 36 915 918 921
1963 30 919 918 920
1964 35 919 918 921
1965 35 920 918 921
1966 28 1152 1154 1155
1967 28 1152 1154 1156
1968 29 1152 1154 1157
1969 30 1155 1154 1156
1970 31 1155 1154 1157
1971 31 1156 1154 1157
1972 35 1161 1164 1165
1973 35 1161 1164 1166
1974 36 1161 1164 1167
1975 30 1165 1164 1166
1976 35 1165 1164 1167
1977 35 1166 1164 1167
1978 28 1152 1161 1162
1979 28 1152 1161 1163
1980 34 1152 1161 1164
1981 30 1162 1161 1163
1982 35 1162 1161 1164
1983 35 1163 1161 1164
1984 35 1164 1167 1168
1985 35 1164 1167 1169
1986 37 1164 1167 1170
1987 30 1168 1167 1169
1988 31 1168 1167 1170
1989 31 1169 1167 1170
1990 32 1167 1170 1171
1991 32 1167 1170 1172
1992 32 1167 1170 1173
1993 33 1171 1170 1172
1994 33 1171 1170 1173
1995 33 1172 1170 1173
1996 49 1101 1102 1103
1997 50 1101 1102 1105
1998 51 1103 1102 1105
1999 52 1099 1103 1102
2000 53 1099 1103 1104
2001 54 1102 1103 1104
2002 55 1097 1104 1103
2003 56 1097 1104 1135
2004 57 1103 1104 1135
2005 1 1135 1134 1138
2006 73 1104 1135 1134
2007 74 1104 1135 1136
2008 2 1134 1135 1136
2009 5 1135 1136 1139
2010 6 1135 1136 1146
2011 7 1139 1136 1146
2012 14 1039 1042 1040
2013 15 1039 1042 1041
2014 16 1040 1042 1041
2015 12 1034 1041 1037
2016 13 1034 1041 1042
2017 11 1037 1041 1042
2018 2 1037 1038 1039
2019 17 1037 1038 1098
2020 18 1039 1038 1098
2021 39 1038 1098 1097
2022 40 1038 1098 1099
2023 41 1097 1098 1099
2024 42 1098 1099 1100
2025 43 1098 1099 1103
2026 44 1100 1099 1103
2027 5 1038 1039 1042
2028 6 1038 1039 1044
2029 7 1042 1039 1044
2030 38 1098 1097 1104
2031 8 1035 1040 1042
2032 10 1035 1040 1071
2033 9 1042 1040 1071
2034 1 1032 1031 1035
2035 11 1031 1035 1036
2036 12 1031 1035 1040
2037 13 1036 1035 1040
2038 19 1040 1071 1072
2039 20 1071 1072 1073
2040 20 1071 1072 1074
2041 21 1071 1072 1075
2042 22 1073 1072 1074
2043 23 1073 1072 1075
2044 23 1074 1072 1075
2045 24 1072 1075 1076
2046 25 1072 1075 1077
2047 25 1072 1075 1084
2048 26 1076 1075 1077
2049 26 1076 1075 1084
2050 27 1077 1075 1084
2051 28 1075 1084 1085
2052 28 1075 1084 1086
2053 34 1075 1084 1087
2054 30 1085 1084 1086
2055 35 1085 1084 1087
2056 35 1086 1084 1087
2057 32 1077 1080 1081
2058 32 1077 1080 1082
2059 32 1077 1080 1083
2060 33 1081 1080 1082
2061 33 1081 1080 1083
2062 33 1082 1080 1083
2063 28 1075 1077 1078
2064 28 1075 1077 1079
2065 29 1075 1077 1080
2066 30 1078 1077 1079
2067 31 1078 1077 1080
2068 31 1079 1077 1080
2069 32 858 861 862
2070 32 858 861 863
2071 32 858 861 864
2072 33 862 861 863
2073 33 862 861 864
2074 33 863 861 864
2075 32 805 808 809
2076 32 805 808 810
2077 32 805 808 811
2078 33 809 808 810
2079 33 809 808 811
2080 33 810 808 811
2081 35 852 855 856
2082 35 852 855 857
2083 36 852 855 858
2084 30 856 855 857
2085 35 856 855 858
2086 35 857 855 858
2087 28 843 845 846
2088 28 843 845 847
2089 29 843 845 848
2090 30 846 845 847
2091 31 846 845 848
2092 31 847 845 848
2093 32 845 848 849
2094 32 845 848 850
2095 32 845 848 851
2096 33 849 848 850
2097 33 849 848 851
2098 33 850 848 851
2099 59 895 902 900
2100 60 895 902 901
2101 61 900 902 901
2102 32 1154 1157 1158
2103 32 1154 1157 1159
2104 32 1154 1157 1160
2105 33 1158 1157 1159
2106 33 1158 1157 1160
2107 33 1159 1157 1160
2108 66 1109 1112 1113
2109 67 1109 1112 1114
2110 67 1109 1112 1121
2111 68 1113 1112 1114
2112 68 1113 1112 1121
2113 69 1114 1112 1121
2114 32 1127 1130 1131
2115 32 1127 1130 1132
2116 32 1127 1130 1133
2117 33 1131 1130 1132
2118 33 1131 1130 1133
2119 33 1132 1130 1133
2120 70 1112 1121 1122
2121 70 1112 1121 1123
2122 72 1112 1121 1124
2123 30 1122 1121 1123
2124 35 1122 1121 1124
2125 35 1123 1121 1124
2126 35 1121 1124 1125
2127 35 1121 1124 1126
2128 36 1121 1124 1127
2129 30 1125 1124 1126
2130 35 1125 1124 1127
2131 35 1126 1124 1127
2132 35 1124 1127 1128
2133 35 1124 1127 1129
2134 37 1124 1127 1130
2135 30 1128 1127 1129
2136 31 1128 1127 1130
2137 31 1129 1127 1130
2138 49 998 999 1000
2139 50 998 999 1002
2140 51 1000 999 1002
2141 58 1005 1004 1006
2142 70 1009 1018 1019
2143 70 1009 1018 1020
2144 72 1009 1018 1021
2145 30 1019 1018 1020
2146 35 1019 1018 1021
2147 35 1020 1018 1021
2148 66 1006 1009 1010
2149 67 1006 1009 1011
2150 67 1006 1009 1018
2151 68 1010 1009 1011
2152 68 1010 1009 1018
2153 69 1011 1009 1018
2154 35 1021 1024 1025
2155 35 1021 1024 1026
2156 37 1021 1024 1027
2157 30 1025 1024 1026
2158 31 1025 1024 1027
2159 31 1026 1024 1027
2160 35 1018 1021 1022
2161 35 1018 1021 1023
2162 36 1018 1021 1024
2163 30 1022 1021 1023
2164 35 1022 1021 1024
2165 35 1023 1021 1024
2166 59 998 1005 1003
2167 60 998 1005 1004
2168 61 1003 1005 1004
2169 70 1009 1011 1012
2170 70 1009 1011 1013
2171 71 1009 1011 1014
2172 30 1012 1011 1013
2173 31 1012 1011 1014
2174 31 1013 1011 1014
2175 62 1004 1006 1007
2176 62 1004 1006 1008
2177 63 1004 1006 1009
2178 64 1007 1006 1008
2179 65 1007 1006 1009
2180 65 1008 1006 1009
2181 45 996 997 998
2182 46 997 998 999
2183 47 997 998 1005
2184 48 999 998 1005
2185 35 984 987 988
2186 35 984 987 989
2187 37 984 987 990
2188 30 988 987 989
2189 31 988 987 990
2190 31 989 987 990
2191 28 972 981 982
2192 28 972 981 983
2193 34 972 981 984
2194 30 982 981 983
2195 35 982 981 984
2196 35 983 981 984
2197 35 981 984 985
2198 35 981 984 986
2199 36 981 984 987
2200 30 985 984 986
2201 35 985 984 987
2202 35 986 984 987
2203 32 987 990 991
2204 32 987 990 992
2205 32 987 990 993
2206 33 991 990 992
2207 33 991 990 993
2208 33 992 990 993
2209 24 969 972 973
2210 25 969 972 974
2211 25 969 972 981
2212 26 973 972 974
2213 26 973 972 981
2214 27 974 972 981
2215 20 968 969 970
2216 20 968 969 971
2217 21 968 969 972
2218 22 970 969 971
2219 23 970 969 972
2220 23 971 969 972
2221 32 974 977 978
2222 32 974 977 979
2223 32 974 977 980
2224 33 978 977 979
2225 33 978 977 980
2226 33 979 977 980
2227 28 972 974 975
2228 28 972 974 976
2229 29 972 974 977
2230 30 975 974 976
2231 31 975 974 977
2232 31 976 974 977
2233 62 901 903 904
2234 62 901 903 905
2235 63 901 903 906
2236 64 904 903 905
2237 65 904 903 906
2238 65 905 903 906
2239 70 906 908 909
2240 70 906 908 910
2241 71 906 908 911
2242 30 909 908 910
2243 31 909 908 911
2244 31 910 908 911
2245 32 908 911 912
2246 32 908 911 913
2247 32 908 911 914
2248 33 912 911 913
2249 33 912 911 914
2250 33 913 911 914
2251 24 1149 1152 1153
2252 25 1149 1152 1154
2253 25 1149 1152 1161
2254 26 1153 1152 1154
2255 26 1153 1152 1161
2256 27 1154 1152 1161
2257 20 1148 1149 1150
2258 20 1148 1149 1151
2259 21 1148 1149 1152
2260 22 1150 1149 1151
2261 23 1150 1149 1152
2262 23 1151 1149 1152
2263 35 1227 1230 1231
2264 35 1227 1230 1232
2265 37 1227 1230 1233
2266 30 1231 1230 1232
2267 31 1231 1230 1233
2268 31 1232 1230 1233
2269 32 1230 1233 1234
2270 32 1230 1233 1235
2271 32 1230 1233 1236
2272 33 1234 1233 1235
2273 33 1234 1233 1236
2274 33 1235 1233 1236
2275 70 1215 1224 1225
2276 70 1215 1224 1226
2277 72 1215 1224 1227
2278 30 1225 1224 1226
2279 35 1225 1224 1227
2280 35 1226 1224 1227
2281 35 1224 1227 1228
2282 35 1224 1227 1229
2283 36 1224 1227 1230
2284 30 1228 1227 1229
2285 35 1228 1227 1230
2286 35 1229 1227 1230
2287 11 1134 1138 1139
2288 12 1134 1138 1143
2289 13 1139 1138 1143
2290 14 1136 1139 1137
2291 15 1136 1139 1138
2292 16 1137 1139 1138
2293 8 1139 1137 1144
2294 9 1139 1137 1148
2295 10 1144 1137 1148
2296 12 1137 1144 1140
2297 13 1137 1144 1145
2298 11 1140 1144 1145
2299 19 1137 1148 1149
2300 35 1190 1193 1194
2301 35 1190 1193 1195
2302 37 1190 1193 1196
2303 30 1194 1193 1195
2304 31 1194 1193 1196
2305 31 1195 1193 1196
2306 32 1193 1196 1197
2307 32 1193 1196 1198
2308 32 1193 1196 1199
2309 33 1197 1196 1198
2310 33 1197 1196 1199
2311 33 1198 1196 1199
2312 35 1187 1190 1191
2313 35 1187 1190 1192
2314 36 1187 1190 1193
2315 30 1191 1190 1192
2316 35 1191 1190 1193
2317 35 1192 1190 1193
2318 32 1024 1027 1028
2319 32 1024 1027 1029
2320 32 1024 1027 1030
2321 33 1028 1027 1029
2322 33 1028 1027 1030
2323 33 1029 1027 1030
2324 35 1084 1087 1088
2325 35 1084 1087 1089
2326 36 1084 1087 1090
2327 30 1088 1087 1089
2328 35 1088 1087 1090
2329 35 1089 1087 1090
2330 35 1087 1090 1091
2331 35 1087 1090 1092
2332 37 1087 1090 1093
2333 30 1091 1090 1092
2334 31 1091 1090 1093
2335 31 1092 1090 1093
2336 32 1090 1093 1094
2337 32 1090 1093 1095
2338 32 1090 1093 1096
2339 33 1094 1093 1095
2340 33 1094 1093 1096
2341 33 1095 1093 1096
2342 1 1141 1140 1144
2343 38 1201 1200 1207
2344 55 1200 1207 1206
2345 75 1200 1207 1238
2346 76 1206 1207 1238
2347 39 1141 1201 1200
2348 40 1141 1201 1202
2349 41 1200 1201 1202
2350 42 1201 1202 1203
2351 43 1201 1202 1206
2352 44 1203 1202 1206
2353 52 1202 1206 1205
2354 53 1202 1206 1207
2355 54 1205 1206 1207
2356 49 1204 1205 1206
2357 50 1204 1205 1208
2358 51 1206 1205 1208
2359 45 1202 1203 1204
2360 8 1138 1143 1145
2361 10 1138 1143 1174
2362 9 1145 1143 1174
2363 19 1143 1174 1175
2364 20 1174 1175 1176
2365 20 1174 1175 1177
2366 21 1174 1175 1178
2367 22 1176 1175 1177
2368 23 1176 1175 1178
2369 23 1177 1175 1178
2370 24 1175 1178 1179
2371 25 1175 1178 1180
2372 25 1175 1178 1187
2373 26 1179 1178 1180
2374 26 1179 1178 1187
2375 27 1180 1178 1187
2376 2 1140 1141 1142
2377 17 1140 1141 1201
2378 18 1142 1141 1201
2379 5 1141 1142 1145
2380 6 1141 1142 1147
2381 7 1145 1142 1147
2382 14 1142 1145 1143
2383 15 1142 1145 1144
2384 16 1143 1145 1144
2385 28 1178 1180 1181
2386 28 1178 1180 1182
2387 29 1178 1180 1183
2388 30 1181 1180 1182
2389 31 1181 1180 1183
2390 31 1182 1180 1183
2391 32 1180 1183 1184
2392 32 1180 1183 1185
2393 32 1180 1183 1186
2394 33 1184 1183 1185
2395 33 1184 1183 1186
2396 33 1185 1183 1186
2397 28 1178 1187 1188
2398 28 1178 1187 1189
2399 34 1178 1187 1190
2400 30 1188 1187 1189
2401 35 1188 1187 1190
2402 35 1189 1187 1190
2403 32 1011 1014 1015
2404 32 1011 1014 1016
2405 32 1011 1014 1017
2406 33 1015 1014 1016
2407 33 1015 1014 1017
2408 33 1016 1014 1017
2409 58 1211 1210 1212
2410 70 1215 1217 1218
2411 70 1215 1217 1219
2412 71 1215 1217 1220
2413 30 1218 1217 1219
2414 31 1218 1217 1220
2415 31 1219 1217 1220
2416 32 1217 1220 1221
2417 32 1217 1220 1222
2418 32 1217 1220 1223
2419 33 1221 1220 1222
2420 33 1221 1220 1223
2421 33 1222 1220 1223
2422 5 517 518 521
2423 6 517 518 528
2424 7 521 518 528

Dihedrals

1 111 494 496 499 500
2 111 494 496 499 501
3 111 494 496 499 502
4 50 497 496 499 500
5 50 497 496 499 501
6 50 497 496 499 502
7 50 498 496 499 500
8 50 498 496 499 501
9 50 498 496 499 502
10 98 489 491 494 495
11 99 489 491 494 496
12 99 489 491 494 503
13 100 492 491 494 495
14 101 492 491 494 496
15 101 492 491 494 503
16 100 493 491 494 495
17 101 493 491 494 496
18 101 493 491 494 503
19 102 491 494 496 497
20 102 491 494 496 498
21 103 491 494 496 499
22 104 495 494 496 497
23 104 495 494 496 498
24 105 495 494 496 499
25 106 503 494 496 497
26 106 503 494 496 498
27 107 503 494 496 499
28 102 491 494 503 504
29 102 491 494 503 505
30 108 491 494 503 506
31 104 495 494 503 504
32 104 495 494 503 505
33 109 495 494 503 506
34 106 496 494 503 504
35 106 496 494 503 505
36 110 496 494 503 506
37 49 431 433 436 437
38 49 431 433 436 438
39 49 431 433 436 439
40 50 434 433 436 437
41 50 434 433 436 438
42 50 434 433 436 439
43 50 435 433 436 437
44 50 435 433 436 438
45 50 435 433 436 439
46 40 428 431 433 434
47 40 428 431 433 435
48 41 428 431 433 436
49 42 432 431 433 434
50 42 432 431 433 435
51 43 432 431 433 436
52 44 440 431 433 434
53 44 440 431 433 435
54 45 440 431 433 436
55 40 428 431 440 441
56 40 428 431 440 442
57 46 428 431 440 443
58 42 432 431 440 441
59 42 432 431 440 442
60 47 432 431 440 443
61 44 433 431 440 441
62 44 433 431 440 442
63 48 433 431 440 443
64 54 440 443 446 447
65 54 440 443 446 448
66 55 440 443 446 449
67 53 444 443 446 447
68 53 444 443 446 448
69 56 444 443 446 449
70 53 445 443 446 447
71 53 445 443 446 448
72 56 445 443 446 449
73 51 431 440 443 444
74 51 431 440 443 445
75 52 431 440 443 446
76 53 441 440 443 444
77 53 441 440 443 445
78 54 441 440 443 446
79 53 442 440 443 444
80 53 442 440 443 445
81 54 442 440 443 446
82 57 443 446 449 450
83 57 443 446 449 451
84 57 443 446 449 452
85 50 447 446 449 450
86 50 447 446 449 451
87 50 447 446 449 452
88 50 448 446 449 450
89 50 448 446 449 451
90 50 448 446 449 452
91 49 45 47 50 51
92 49 45 47 50 52
93 49 45 47 50 53
94 50 48 47 50 51
95 50 48 47 50 52
96 50 48 47 50 53
97 50 49 47 50 51
98 50 49 47 50 52
99 50 49 47 50 53
100 57 197 200 203 204
101 57 197 200 203 205
102 57 197 200 203 206
103 50 201 200 203 204
104 50 201 200 203 205
105 50 201 200 203 206
106 50 202 200 203 204
107 50 202 200 203 205
108 50 202 200 203 206
109 112 185 194 197 198
110 112 185 194 197 199
111 113 185 194 197 200
112 53 195 194 197 198
113 53 195 194 197 199
114 54 195 194 197 200
115 53 196 194 197 198
116 53 196 194 197 199
117 54 196 194 197 200
118 102 182 185 187 188
119 102 182 185 187 189
120 103 182 185 187 190
121 104 186 185 187 188
122 104 186 185 187 189
123 105 186 185 187 190
124 106 194 185 187 188
125 106 194 185 187 189
126 107 194 185 187 190
127 102 182 185 194 195
128 102 182 185 194 196
129 108 182 185 194 197
130 104 186 185 194 195
131 104 186 185 194 196
132 109 186 185 194 197
133 106 187 185 194 195
134 106 187 185 194 196
135 110 187 185 194 197
136 54 194 197 200 201
137 54 194 197 200 202
138 55 194 197 200 203
139 53 198 197 200 201
140 53 198 197 200 202
141 56 198 197 200 203
142 53 199 197 200 201
143 53 199 197 200 202
144 56 199 197 200 203
145 94 182 180 181 174
146 95 182 180 181 179
147 96 181 180 182 183
148 96 181 180 182 184
149 97 181 180 182 185
150 57 160 163 166 167
151 57 160 163 166 168
152 57 160 163 166 169
153 50 164 163 166 167
154 50 164 163 166 168
155 50 164 163 166 169
156 50 165 163 166 167
157 50 165 163 166 168
158 50 165 163 166 169
159 74 173 174 175 176
160 75 173 174 175 178
161 76 181 174 175 176
162 77 181 174 175 178
163 78 173 174 181 179
164 79 173 174 181 180
165 80 175 174 181 179
166 81 175 174 181 180
167 54 157 160 163 164
168 54 157 160 163 165
169 55 157 160 163 166
170 53 161 160 163 164
171 53 161 160 163 165
172 56 161 160 163 166
173 53 162 160 163 164
174 53 162 160 163 165
175 56 162 160 163 166
176 34 113 144 145 146
177 34 113 144 145 147
178 35 113 144 145 148
179 9 8 9 12 10
180 10 8 9 12 11
181 11 14 9 12 10
182 12 14 9 12 11
183 57 57 60 63 64
184 57 57 60 63 65
185 57 57 60 63 66
186 50 61 60 63 64
187 50 61 60 63 65
188 50 61 60 63 66
189 50 62 60 63 64
190 50 62 60 63 65
191 50 62 60 63 66
192 51 45 54 57 58
193 51 45 54 57 59
194 52 45 54 57 60
195 53 55 54 57 58
196 53 55 54 57 59
197 54 55 54 57 60
198 53 56 54 57 58
199 53 56 54 57 59
200 54 56 54 57 60
201 54 54 57 60 61
202 54 54 57 60 62
203 55 54 57 60 63
204 53 58 57 60 61
205 53 58 57 60 62
206 56 58 57 60 63
207 53 59 57 60 61
208 53 59 57 60 62
209 56 59 57 60 63
210 34 10 41 42 43
211 34 10 41 42 44
212 35 10 41 42 45
213 13 5 10 12 9
214 14 5 10 12 11
215 15 41 10 12 9
216 16 41 10 12 11
217 22 5 10 41 42
218 21 12 10 41 42
219 36 41 42 45 46
220 37 41 42 45 47
221 37 41 42 45 54
222 38 43 42 45 46
223 39 43 42 45 47
224 39 43 42 45 54
225 38 44 42 45 46
226 39 44 42 45 47
227 39 44 42 45 54
228 40 42 45 47 48
229 40 42 45 47 49
230 41 42 45 47 50
231 42 46 45 47 48
232 42 46 45 47 49
233 43 46 45 47 50
234 44 54 45 47 48
235 44 54 45 47 49
236 45 54 45 47 50
237 40 42 45 54 55
238 40 42 45 54 56
239 46 42 45 54 57
240 42 46 45 54 55
241 42 46 45 54 56
242 47 46 45 54 57
243 44 47 45 54 55
244 44 47 45 54 56
245 48 47 45 54 57
246 23 1 5 6 3
247 24 1 5 6 4
248 25 10 5 6 3
249 26 10 5 6 4
250 17 1 5 10 12
251 19 1 5 10 41
252 18 6 5 10 12
253 20 6 5 10 41
254 1 5 1 2 3
255 2 5 1 2 1237
256 3 2 1 5 6
257 4 2 1 5 10
258 5 1 2 3 6
259 6 1 2 3 13
260 7 1237 2 3 6
261 8 1237 2 3 13
262 111 185 187 190 191
263 111 185 187 190 192
264 111 185 187 190 193
265 50 188 187 190 191
266 50 188 187 190 192
267 50 188 187 190 193
268 50 189 187 190 191
269 50 189 187 190 192
270 50 189 187 190 193
271 98 180 182 185 186
272 99 180 182 185 187
273 99 180 182 185 194
274 100 183 182 185 186
275 101 183 182 185 187
276 101 183 182 185 194
277 100 184 182 185 186
278 101 184 182 185 187
279 101 184 182 185 194
280 51 148 157 160 161
281 51 148 157 160 162
282 52 148 157 160 163
283 53 158 157 160 161
284 53 158 157 160 162
285 54 158 157 160 163
286 53 159 157 160 161
287 53 159 157 160 162
288 54 159 157 160 163
289 49 148 150 153 154
290 49 148 150 153 155
291 49 148 150 153 156
292 50 151 150 153 154
293 50 151 150 153 155
294 50 151 150 153 156
295 50 152 150 153 154
296 50 152 150 153 155
297 50 152 150 153 156
298 40 145 148 150 151
299 40 145 148 150 152
300 41 145 148 150 153
301 42 149 148 150 151
302 42 149 148 150 152
303 43 149 148 150 153
304 44 157 148 150 151
305 44 157 148 150 152
306 45 157 148 150 153
307 40 145 148 157 158
308 40 145 148 157 159
309 46 145 148 157 160
310 42 149 148 157 158
311 42 149 148 157 159
312 47 149 148 157 160
313 44 150 148 157 158
314 44 150 148 157 159
315 48 150 148 157 160
316 36 144 145 148 149
317 37 144 145 148 150
318 37 144 145 148 157
319 38 146 145 148 149
320 39 146 145 148 150
321 39 146 145 148 157
322 38 147 145 148 149
323 39 147 145 148 150
324 39 147 145 148 157
325 9 2 3 6 4
326 10 2 3 6 5
327 11 13 3 6 4
328 12 13 3 6 5
329 51 19 28 31 32
330 51 19 28 31 33
331 52 19 28 31 34
332 53 29 28 31 32
333 53 29 28 31 33
334 54 29 28 31 34
335 53 30 28 31 32
336 53 30 28 31 33
337 54 30 28 31 34
338 57 31 34 37 38
339 57 31 34 37 39
340 57 31 34 37 40
341 50 35 34 37 38
342 50 35 34 37 39
343 50 35 34 37 40
344 50 36 34 37 38
345 50 36 34 37 39
346 50 36 34 37 40
347 94 491 489 490 483
348 95 491 489 490 488
349 96 490 489 491 492
350 96 490 489 491 493
351 97 490 489 491 494
352 74 482 483 484 485
353 75 482 483 484 487
354 76 490 483 484 485
355 77 490 483 484 487
356 78 482 483 490 488
357 79 482 483 490 489
358 80 484 483 490 488
359 81 484 483 490 489
360 57 546 549 552 553
361 57 546 549 552 554
362 57 546 549 552 555
363 50 550 549 552 553
364 50 550 549 552 554
365 50 550 549 552 555
366 50 551 549 552 553
367 50 551 549 552 554
368 50 551 549 552 555
369 51 534 543 546 547
370 51 534 543 546 548
371 52 534 543 546 549
372 53 544 543 546 547
373 53 544 543 546 548
374 54 544 543 546 549
375 53 545 543 546 547
376 53 545 543 546 548
377 54 545 543 546 549
378 54 543 546 549 550
379 54 543 546 549 551
380 55 543 546 549 552
381 53 547 546 549 550
382 53 547 546 549 551
383 56 547 546 549 552
384 53 548 546 549 550
385 53 548 546 549 551
386 56 548 546 549 552
387 82 483 484 485 481
388 83 483 484 485 486
389 84 487 484 485 481
390 85 487 484 485 486
391 112 494 503 506 507
392 112 494 503 506 508
393 113 494 503 506 509
394 53 504 503 506 507
395 53 504 503 506 508
396 54 504 503 506 509
397 53 505 503 506 507
398 53 505 503 506 508
399 54 505 503 506 509
400 54 503 506 509 510
401 54 503 506 509 511
402 55 503 506 509 512
403 53 507 506 509 510
404 53 507 506 509 511
405 56 507 506 509 512
406 53 508 506 509 510
407 53 508 506 509 511
408 56 508 506 509 512
409 57 506 509 512 513
410 57 506 509 512 514
411 57 506 509 512 515
412 50 510 509 512 513
413 50 510 509 512 514
414 50 510 509 512 515
415 50 511 509 512 513
416 50 511 509 512 514
417 50 511 509 512 515
418 72 481 482 483 484
419 73 481 482 483 490
420 86 481 485 486 479
421 87 481 485 486 517
422 88 484 485 486 479
423 89 484 485 486 517
424 90 479 486 517 516
425 91 479 486 517 518
426 92 485 486 517 516
427 93 485 486 517 518
428 1 423 419 420 421
429 27 423 419 420 480
430 4 420 419 423 416
431 3 420 419 423 424
432 66 480 481 482 483
433 67 485 481 482 483
434 68 480 481 485 484
435 69 480 481 485 486
436 70 482 481 485 484
437 71 482 481 485 486
438 62 420 480 481 482
439 63 420 480 481 485
440 64 479 480 481 482
441 65 479 480 481 485
442 5 419 420 421 424
443 6 419 420 421 426
444 28 480 420 421 424
445 29 480 420 421 426
446 30 419 420 480 479
447 31 419 420 480 481
448 32 421 420 480 479
449 33 421 420 480 481
450 66 274 275 276 277
451 67 279 275 276 277
452 68 274 275 279 278
453 69 274 275 279 280
454 70 276 275 279 278
455 71 276 275 279 280
456 58 486 479 480 420
457 59 486 479 480 481
458 60 480 479 486 485
459 61 480 479 486 517
460 9 420 421 424 422
461 10 420 421 424 423
462 11 426 421 424 422
463 12 426 421 424 423
464 102 388 391 393 394
465 102 388 391 393 395
466 103 388 391 393 396
467 104 392 391 393 394
468 104 392 391 393 395
469 105 392 391 393 396
470 106 400 391 393 394
471 106 400 391 393 395
472 107 400 391 393 396
473 102 388 391 400 401
474 102 388 391 400 402
475 108 388 391 400 403
476 104 392 391 400 401
477 104 392 391 400 402
478 109 392 391 400 403
479 106 393 391 400 401
480 106 393 391 400 402
481 110 393 391 400 403
482 36 427 428 431 432
483 37 427 428 431 433
484 37 427 428 431 440
485 38 429 428 431 432
486 39 429 428 431 433
487 39 429 428 431 440
488 38 430 428 431 432
489 39 430 428 431 433
490 39 430 428 431 440
491 111 391 393 396 397
492 111 391 393 396 398
493 111 391 393 396 399
494 50 394 393 396 397
495 50 394 393 396 398
496 50 394 393 396 399
497 50 395 393 396 397
498 50 395 393 396 398
499 50 395 393 396 399
500 98 386 388 391 392
501 99 386 388 391 393
502 99 386 388 391 400
503 100 389 388 391 392
504 101 389 388 391 393
505 101 389 388 391 400
506 100 390 388 391 392
507 101 390 388 391 393
508 101 390 388 391 400
509 112 391 400 403 404
510 112 391 400 403 405
511 113 391 400 403 406
512 53 401 400 403 404
513 53 401 400 403 405
514 54 401 400 403 406
515 53 402 400 403 404
516 53 402 400 403 405
517 54 402 400 403 406
518 54 400 403 406 407
519 54 400 403 406 408
520 55 400 403 406 409
521 53 404 403 406 407
522 53 404 403 406 408
523 56 404 403 406 409
524 53 405 403 406 407
525 53 405 403 406 408
526 56 405 403 406 409
527 57 403 406 409 410
528 57 403 406 409 411
529 57 403 406 409 412
530 50 407 406 409 410
531 50 407 406 409 411
532 50 407 406 409 412
533 50 408 406 409 410
534 50 408 406 409 411
535 50 408 406 409 412
536 34 416 427 428 429
537 34 416 427 428 430
538 35 416 427 428 431
539 25 416 423 424 421
540 26 416 423 424 422
541 23 419 423 424 421
542 24 419 423 424 422
543 9 414 415 418 416
544 10 414 415 418 417
545 11 425 415 418 416
546 12 425 415 418 417
547 13 423 416 418 415
548 14 423 416 418 417
549 15 427 416 418 415
550 16 427 416 418 417
551 17 418 416 423 419
552 18 418 416 423 424
553 19 427 416 423 419
554 20 427 416 423 424
555 21 418 416 427 428
556 22 423 416 427 428
557 13 417 422 424 421
558 14 417 422 424 423
559 15 453 422 424 421
560 16 453 422 424 423
561 22 417 422 453 454
562 21 424 422 453 454
563 115 383 414 415 418
564 116 383 414 415 425
565 5 413 414 415 418
566 6 413 414 415 425
567 114 417 413 414 383
568 1 417 413 414 415
569 3 414 413 417 418
570 4 414 413 417 422
571 23 413 417 418 415
572 24 413 417 418 416
573 25 422 417 418 415
574 26 422 417 418 416
575 17 413 417 422 424
576 19 413 417 422 453
577 18 418 417 422 424
578 20 418 417 422 453
579 94 388 386 387 380
580 95 388 386 387 385
581 96 387 386 388 389
582 96 387 386 388 390
583 97 387 386 388 391
584 82 380 381 382 378
585 83 380 381 382 383
586 84 384 381 382 378
587 85 384 381 382 383
588 74 379 380 381 382
589 75 379 380 381 384
590 76 387 380 381 382
591 77 387 380 381 384
592 78 379 380 387 385
593 79 379 380 387 386
594 80 381 380 387 385
595 81 381 380 387 386
596 86 378 382 383 376
597 87 378 382 383 414
598 88 381 382 383 376
599 89 381 382 383 414
600 72 378 379 380 381
601 73 378 379 380 387
602 90 376 383 414 413
603 91 376 383 414 415
604 92 382 383 414 413
605 93 382 383 414 415
606 66 377 378 379 380
607 67 382 378 379 380
608 68 377 378 382 381
609 69 377 378 382 383
610 70 379 378 382 381
611 71 379 378 382 383
612 62 317 377 378 379
613 63 317 377 378 382
614 64 376 377 378 379
615 65 376 377 378 382
616 1 320 316 317 318
617 27 320 316 317 377
618 4 317 316 320 313
619 3 317 316 320 321
620 58 383 376 377 317
621 59 383 376 377 378
622 60 377 376 383 382
623 61 377 376 383 414
624 5 316 317 318 321
625 6 316 317 318 323
626 28 377 317 318 321
627 29 377 317 318 323
628 30 316 317 377 376
629 31 316 317 377 378
630 32 318 317 377 376
631 33 318 317 377 378
632 9 317 318 321 319
633 10 317 318 321 320
634 11 323 318 321 319
635 12 323 318 321 320
636 57 366 369 372 373
637 57 366 369 372 374
638 57 366 369 372 375
639 50 370 369 372 373
640 50 370 369 372 374
641 50 370 369 372 375
642 50 371 369 372 373
643 50 371 369 372 374
644 50 371 369 372 375
645 54 363 366 369 370
646 54 363 366 369 371
647 55 363 366 369 372
648 53 367 366 369 370
649 53 367 366 369 371
650 56 367 366 369 372
651 53 368 366 369 370
652 53 368 366 369 371
653 56 368 366 369 372
654 51 354 363 366 367
655 51 354 363 366 368
656 52 354 363 366 369
657 53 364 363 366 367
658 53 364 363 366 368
659 54 364 363 366 369
660 53 365 363 366 367
661 53 365 363 366 368
662 54 365 363 366 369
663 49 354 356 359 360
664 49 354 356 359 361
665 49 354 356 359 362
666 50 357 356 359 360
667 50 357 356 359 361
668 50 357 356 359 362
669 50 358 356 359 360
670 50 358 356 359 361
671 50 358 356 359 362
672 40 351 354 356 357
673 40 351 354 356 358
674 41 351 354 356 359
675 42 355 354 356 357
676 42 355 354 356 358
677 43 355 354 356 359
678 44 363 354 356 357
679 44 363 354 356 358
680 45 363 354 356 359
681 40 351 354 363 364
682 40 351 354 363 365
683 46 351 354 363 366
684 42 355 354 363 364
685 42 355 354 363 365
686 47 355 354 363 366
687 44 356 354 363 364
688 44 356 354 363 365
689 48 356 354 363 366
690 49 328 330 333 334
691 49 328 330 333 335
692 49 328 330 333 336
693 50 331 330 333 334
694 50 331 330 333 335
695 50 331 330 333 336
696 50 332 330 333 334
697 50 332 330 333 335
698 50 332 330 333 336
699 51 328 337 340 341
700 51 328 337 340 342
701 52 328 337 340 343
702 53 338 337 340 341
703 53 338 337 340 342
704 54 338 337 340 343
705 53 339 337 340 341
706 53 339 337 340 342
707 54 339 337 340 343
708 40 325 328 330 331
709 40 325 328 330 332
710 41 325 328 330 333
711 42 329 328 330 331
712 42 329 328 330 332
713 43 329 328 330 333
714 44 337 328 330 331
715 44 337 328 330 332
716 45 337 328 330 333
717 40 325 328 337 338
718 40 325 328 337 339
719 46 325 328 337 340
720 42 329 328 337 338
721 42 329 328 337 339
722 47 329 328 337 340
723 44 330 328 337 338
724 44 330 328 337 339
725 48 330 328 337 340
726 36 324 325 328 329
727 37 324 325 328 330
728 37 324 325 328 337
729 38 326 325 328 329
730 39 326 325 328 330
731 39 326 325 328 337
732 38 327 325 328 329
733 39 327 325 328 330
734 39 327 325 328 337
735 25 313 320 321 318
736 26 313 320 321 319
737 23 316 320 321 318
738 24 316 320 321 319
739 13 314 319 321 318
740 14 314 319 321 320
741 15 350 319 321 318
742 16 350 319 321 320
743 22 314 319 350 351
744 21 321 319 350 351
745 34 319 350 351 352
746 34 319 350 351 353
747 35 319 350 351 354
748 114 314 310 311 280
749 1 314 310 311 312
750 3 311 310 314 315
751 4 311 310 314 319
752 115 280 311 312 315
753 116 280 311 312 322
754 5 310 311 312 315
755 6 310 311 312 322
756 9 311 312 315 313
757 10 311 312 315 314
758 11 322 312 315 313
759 12 322 312 315 314
760 34 313 324 325 326
761 34 313 324 325 327
762 35 313 324 325 328
763 13 320 313 315 312
764 14 320 313 315 314
765 15 324 313 315 312
766 16 324 313 315 314
767 17 315 313 320 316
768 18 315 313 320 321
769 19 324 313 320 316
770 20 324 313 320 321
771 21 315 313 324 325
772 22 320 313 324 325
773 23 310 314 315 312
774 24 310 314 315 313
775 25 319 314 315 312
776 26 319 314 315 313
777 17 310 314 319 321
778 19 310 314 319 350
779 18 315 314 319 321
780 20 315 314 319 350
781 90 273 280 311 310
782 91 273 280 311 312
783 92 279 280 311 310
784 93 279 280 311 312
785 36 350 351 354 355
786 37 350 351 354 356
787 37 350 351 354 363
788 38 352 351 354 355
789 39 352 351 354 356
790 39 352 351 354 363
791 38 353 351 354 355
792 39 353 351 354 356
793 39 353 351 354 363
794 57 263 266 269 270
795 57 263 266 269 271
796 57 263 266 269 272
797 50 267 266 269 270
798 50 267 266 269 271
799 50 267 266 269 272
800 50 268 266 269 270
801 50 268 266 269 271
802 50 268 266 269 272
803 62 214 274 275 276
804 63 214 274 275 279
805 64 273 274 275 276
806 65 273 274 275 279
807 54 28 31 34 35
808 54 28 31 34 36
809 55 28 31 34 37
810 53 32 31 34 35
811 53 32 31 34 36
812 56 32 31 34 37
813 53 33 31 34 35
814 53 33 31 34 36
815 56 33 31 34 37
816 54 260 263 266 267
817 54 260 263 266 268
818 55 260 263 266 269
819 53 264 263 266 267
820 53 264 263 266 268
821 56 264 263 266 269
822 53 265 263 266 267
823 53 265 263 266 268
824 56 265 263 266 269
825 49 225 227 230 231
826 49 225 227 230 232
827 49 225 227 230 233
828 50 228 227 230 231
829 50 228 227 230 232
830 50 228 227 230 233
831 50 229 227 230 231
832 50 229 227 230 232
833 50 229 227 230 233
834 58 280 273 274 214
835 59 280 273 274 275
836 60 274 273 280 279
837 61 274 273 280 311
838 25 210 217 218 215
839 26 210 217 218 216
840 23 213 217 218 215
841 24 213 217 218 216
842 13 211 216 218 215
843 14 211 216 218 217
844 15 247 216 218 215
845 16 247 216 218 217
846 22 211 216 247 248
847 21 218 216 247 248
848 9 214 215 218 216
849 10 214 215 218 217
850 11 220 215 218 216
851 12 220 215 218 217
852 13 217 210 212 209
853 14 217 210 212 211
854 15 221 210 212 209
855 16 221 210 212 211
856 17 212 210 217 213
857 18 212 210 217 218
858 19 221 210 217 213
859 20 221 210 217 218
860 21 212 210 221 222
861 22 217 210 221 222
862 36 221 222 225 226
863 37 221 222 225 227
864 37 221 222 225 234
865 38 223 222 225 226
866 39 223 222 225 227
867 39 223 222 225 234
868 38 224 222 225 226
869 39 224 222 225 227
870 39 224 222 225 234
871 34 210 221 222 223
872 34 210 221 222 224
873 35 210 221 222 225
874 40 222 225 227 228
875 40 222 225 227 229
876 41 222 225 227 230
877 42 226 225 227 228
878 42 226 225 227 229
879 43 226 225 227 230
880 44 234 225 227 228
881 44 234 225 227 229
882 45 234 225 227 230
883 40 222 225 234 235
884 40 222 225 234 236
885 46 222 225 234 237
886 42 226 225 234 235
887 42 226 225 234 236
888 47 226 225 234 237
889 44 227 225 234 235
890 44 227 225 234 236
891 48 227 225 234 237
892 5 213 214 215 218
893 6 213 214 215 220
894 28 274 214 215 218
895 29 274 214 215 220
896 30 213 214 274 273
897 31 213 214 274 275
898 32 215 214 274 273
899 33 215 214 274 275
900 1 217 213 214 215
901 27 217 213 214 274
902 4 214 213 217 210
903 3 214 213 217 218
904 54 234 237 240 241
905 54 234 237 240 242
906 55 234 237 240 243
907 53 238 237 240 241
908 53 238 237 240 242
909 56 238 237 240 243
910 53 239 237 240 241
911 53 239 237 240 242
912 56 239 237 240 243
913 57 237 240 243 244
914 57 237 240 243 245
915 57 237 240 243 246
916 50 241 240 243 244
917 50 241 240 243 245
918 50 241 240 243 246
919 50 242 240 243 244
920 50 242 240 243 245
921 50 242 240 243 246
922 9 208 209 212 210
923 10 208 209 212 211
924 11 219 209 212 210
925 12 219 209 212 211
926 51 225 234 237 238
927 51 225 234 237 239
928 52 225 234 237 240
929 53 235 234 237 238
930 53 235 234 237 239
931 54 235 234 237 240
932 53 236 234 237 238
933 53 236 234 237 239
934 54 236 234 237 240
935 51 122 131 134 135
936 51 122 131 134 136
937 52 122 131 134 137
938 53 132 131 134 135
939 53 132 131 134 136
940 54 132 131 134 137
941 53 133 131 134 135
942 53 133 131 134 136
943 54 133 131 134 137
944 57 300 303 306 307
945 57 300 303 306 308
946 57 300 303 306 309
947 50 304 303 306 307
948 50 304 303 306 308
949 50 304 303 306 309
950 50 305 303 306 307
951 50 305 303 306 308
952 50 305 303 306 309
953 57 94 97 100 101
954 57 94 97 100 102
955 57 94 97 100 103
956 50 98 97 100 101
957 50 98 97 100 102
958 50 98 97 100 103
959 50 99 97 100 101
960 50 99 97 100 102
961 50 99 97 100 103
962 51 251 260 263 264
963 51 251 260 263 265
964 52 251 260 263 266
965 53 261 260 263 264
966 53 261 260 263 265
967 54 261 260 263 266
968 53 262 260 263 264
969 53 262 260 263 265
970 54 262 260 263 266
971 23 207 211 212 209
972 24 207 211 212 210
973 25 216 211 212 209
974 26 216 211 212 210
975 17 207 211 216 218
976 19 207 211 216 247
977 18 212 211 216 218
978 20 212 211 216 247
979 34 216 247 248 249
980 34 216 247 248 250
981 35 216 247 248 251
982 40 248 251 253 254
983 40 248 251 253 255
984 41 248 251 253 256
985 42 252 251 253 254
986 42 252 251 253 255
987 43 252 251 253 256
988 44 260 251 253 254
989 44 260 251 253 255
990 45 260 251 253 256
991 40 248 251 260 261
992 40 248 251 260 262
993 46 248 251 260 263
994 42 252 251 260 261
995 42 252 251 260 262
996 47 252 251 260 263
997 44 253 251 260 261
998 44 253 251 260 262
999 48 253 251 260 263
1000 49 251 253 256 257
1001 49 251 253 256 258
1002 49 251 253 256 259
1003 50 254 253 256 257
1004 50 254 253 256 258
1005 50 254 253 256 259
1006 50 255 253 256 257
1007 50 255 253 256 258
1008 50 255 253 256 259
1009 36 247 248 251 252
1010 37 247 248 251 253
1011 37 247 248 251 260
1012 38 249 248 251 252
1013 39 249 248 251 253
1014 39 249 248 251 260
1015 38 250 248 251 252
1016 39 250 248 251 253
1017 39 250 248 251 260
1018 114 211 207 208 177
1019 1 211 207 208 209
1020 3 208 207 211 212
1021 4 208 207 211 216
1022 82 174 175 176 172
1023 83 174 175 176 177
1024 84 178 175 176 172
1025 85 178 175 176 177
1026 115 177 208 209 212
1027 116 177 208 209 219
1028 5 207 208 209 212
1029 6 207 208 209 219
1030 86 172 176 177 170
1031 87 172 176 177 208
1032 88 175 176 177 170
1033 89 175 176 177 208
1034 90 170 177 208 207
1035 91 170 177 208 209
1036 92 176 177 208 207
1037 93 176 177 208 209
1038 72 172 173 174 175
1039 73 172 173 174 181
1040 9 111 112 115 113
1041 10 111 112 115 114
1042 11 117 112 115 113
1043 12 117 112 115 114
1044 66 171 172 173 174
1045 67 176 172 173 174
1046 68 171 172 176 175
1047 69 171 172 176 177
1048 70 173 172 176 175
1049 71 173 172 176 177
1050 5 110 111 112 115
1051 6 110 111 112 117
1052 28 171 111 112 115
1053 29 171 111 112 117
1054 30 110 111 171 170
1055 31 110 111 171 172
1056 32 112 111 171 170
1057 33 112 111 171 172
1058 62 111 171 172 173
1059 63 111 171 172 176
1060 64 170 171 172 173
1061 65 170 171 172 176
1062 58 177 170 171 111
1063 59 177 170 171 172
1064 60 171 170 177 176
1065 61 171 170 177 208
1066 49 122 124 127 128
1067 49 122 124 127 129
1068 49 122 124 127 130
1069 50 125 124 127 128
1070 50 125 124 127 129
1071 50 125 124 127 130
1072 50 126 124 127 128
1073 50 126 124 127 129
1074 50 126 124 127 130
1075 1 114 110 111 112
1076 27 114 110 111 171
1077 4 111 110 114 107
1078 3 111 110 114 115
1079 25 107 114 115 112
1080 26 107 114 115 113
1081 23 110 114 115 112
1082 24 110 114 115 113
1083 9 105 106 109 107
1084 10 105 106 109 108
1085 11 116 106 109 107
1086 12 116 106 109 108
1087 13 114 107 109 106
1088 14 114 107 109 108
1089 15 118 107 109 106
1090 16 118 107 109 108
1091 17 109 107 114 110
1092 18 109 107 114 115
1093 19 118 107 114 110
1094 20 118 107 114 115
1095 21 109 107 118 119
1096 22 114 107 118 119
1097 34 107 118 119 120
1098 34 107 118 119 121
1099 35 107 118 119 122
1100 40 119 122 124 125
1101 40 119 122 124 126
1102 41 119 122 124 127
1103 42 123 122 124 125
1104 42 123 122 124 126
1105 43 123 122 124 127
1106 44 131 122 124 125
1107 44 131 122 124 126
1108 45 131 122 124 127
1109 40 119 122 131 132
1110 40 119 122 131 133
1111 46 119 122 131 134
1112 42 123 122 131 132
1113 42 123 122 131 133
1114 47 123 122 131 134
1115 44 124 122 131 132
1116 44 124 122 131 133
1117 48 124 122 131 134
1118 36 118 119 122 123
1119 37 118 119 122 124
1120 37 118 119 122 131
1121 38 120 119 122 123
1122 39 120 119 122 124
1123 39 120 119 122 131
1124 38 121 119 122 123
1125 39 121 119 122 124
1126 39 121 119 122 131
1127 13 108 113 115 112
1128 14 108 113 115 114
1129 15 144 113 115 112
1130 16 144 113 115 114
1131 22 108 113 144 145
1132 21 115 113 144 145
1133 115 74 105 106 109
1134 116 74 105 106 116
1135 5 104 105 106 109
1136 6 104 105 106 116
1137 23 104 108 109 106
1138 24 104 108 109 107
1139 25 113 108 109 106
1140 26 113 108 109 107
1141 17 104 108 113 115
1142 19 104 108 113 144
1143 18 109 108 113 115
1144 20 109 108 113 144
1145 114 108 104 105 74
1146 1 108 104 105 106
1147 3 105 104 108 109
1148 4 105 104 108 113
1149 58 74 67 68 8
1150 59 74 67 68 69
1151 60 68 67 74 73
1152 61 68 67 74 105
1153 90 67 74 105 104
1154 91 67 74 105 106
1155 92 73 74 105 104
1156 93 73 74 105 106
1157 5 7 8 9 12
1158 6 7 8 9 14
1159 28 68 8 9 12
1160 29 68 8 9 14
1161 30 7 8 68 67
1162 31 7 8 68 69
1163 32 9 8 68 67
1164 33 9 8 68 69
1165 94 79 77 78 71
1166 95 79 77 78 76
1167 96 78 77 79 80
1168 96 78 77 79 81
1169 97 78 77 79 82
1170 82 71 72 73 69
1171 83 71 72 73 74
1172 84 75 72 73 69
1173 85 75 72 73 74
1174 86 69 73 74 67
1175 87 69 73 74 105
1176 88 72 73 74 67
1177 89 72 73 74 105
1178 74 70 71 72 73
1179 75 70 71 72 75
1180 76 78 71 72 73
1181 77 78 71 72 75
1182 78 70 71 78 76
1183 79 70 71 78 77
1184 80 72 71 78 76
1185 81 72 71 78 77
1186 1 11 7 8 9
1187 27 11 7 8 68
1188 4 8 7 11 4
1189 3 8 7 11 12
1190 66 68 69 70 71
1191 67 73 69 70 71
1192 68 68 69 73 72
1193 69 68 69 73 74
1194 70 70 69 73 72
1195 71 70 69 73 74
1196 62 8 68 69 70
1197 63 8 68 69 73
1198 64 67 68 69 70
1199 65 67 68 69 73
1200 72 69 70 71 72
1201 73 69 70 71 78
1202 25 4 11 12 9
1203 26 4 11 12 10
1204 23 7 11 12 9
1205 24 7 11 12 10
1206 13 11 4 6 3
1207 14 11 4 6 5
1208 15 15 4 6 3
1209 16 15 4 6 5
1210 17 6 4 11 7
1211 18 6 4 11 12
1212 19 15 4 11 7
1213 20 15 4 11 12
1214 21 6 4 15 16
1215 22 11 4 15 16
1216 36 15 16 19 20
1217 37 15 16 19 21
1218 37 15 16 19 28
1219 38 17 16 19 20
1220 39 17 16 19 21
1221 39 17 16 19 28
1222 38 18 16 19 20
1223 39 18 16 19 21
1224 39 18 16 19 28
1225 40 16 19 21 22
1226 40 16 19 21 23
1227 41 16 19 21 24
1228 42 20 19 21 22
1229 42 20 19 21 23
1230 43 20 19 21 24
1231 44 28 19 21 22
1232 44 28 19 21 23
1233 45 28 19 21 24
1234 40 16 19 28 29
1235 40 16 19 28 30
1236 46 16 19 28 31
1237 42 20 19 28 29
1238 42 20 19 28 30
1239 47 20 19 28 31
1240 44 21 19 28 29
1241 44 21 19 28 30
1242 48 21 19 28 31
1243 49 19 21 24 25
1244 49 19 21 24 26
1245 49 19 21 24 27
1246 50 22 21 24 25
1247 50 22 21 24 26
1248 50 22 21 24 27
1249 50 23 21 24 25
1250 50 23 21 24 26
1251 50 23 21 24 27
1252 34 4 15 16 17
1253 34 4 15 16 18
1254 35 4 15 16 19
1255 98 77 79 82 83
1256 99 77 79 82 84
1257 99 77 79 82 91
1258 100 80 79 82 83
1259 101 80 79 82 84
1260 101 80 79 82 91
1261 100 81 79 82 83
1262 101 81 79 82 84
1263 101 81 79 82 91
1264 111 82 84 87 88
1265 111 82 84 87 89
1266 111 82 84 87 90
1267 50 85 84 87 88
1268 50 85 84 87 89
1269 50 85 84 87 90
1270 50 86 84 87 88
1271 50 86 84 87 89
1272 50 86 84 87 90
1273 102 79 82 84 85
1274 102 79 82 84 86
1275 103 79 82 84 87
1276 104 83 82 84 85
1277 104 83 82 84 86
1278 105 83 82 84 87
1279 106 91 82 84 85
1280 106 91 82 84 86
1281 107 91 82 84 87
1282 102 79 82 91 92
1283 102 79 82 91 93
1284 108 79 82 91 94
1285 104 83 82 91 92
1286 104 83 82 91 93
1287 109 83 82 91 94
1288 106 84 82 91 92
1289 106 84 82 91 93
1290 110 84 82 91 94
1291 112 82 91 94 95
1292 112 82 91 94 96
1293 113 82 91 94 97
1294 53 92 91 94 95
1295 53 92 91 94 96
1296 54 92 91 94 97
1297 53 93 91 94 95
1298 53 93 91 94 96
1299 54 93 91 94 97
1300 54 91 94 97 98
1301 54 91 94 97 99
1302 55 91 94 97 100
1303 53 95 94 97 98
1304 53 95 94 97 99
1305 56 95 94 97 100
1306 53 96 94 97 98
1307 53 96 94 97 99
1308 56 96 94 97 100
1309 57 340 343 346 347
1310 57 340 343 346 348
1311 57 340 343 346 349
1312 50 344 343 346 347
1313 50 344 343 346 348
1314 50 344 343 346 349
1315 50 345 343 346 347
1316 50 345 343 346 348
1317 50 345 343 346 349
1318 49 457 459 462 463
1319 49 457 459 462 464
1320 49 457 459 462 465
1321 50 460 459 462 463
1322 50 460 459 462 464
1323 50 460 459 462 465
1324 50 461 459 462 463
1325 50 461 459 462 464
1326 50 461 459 462 465
1327 115 486 517 518 521
1328 116 486 517 518 528
1329 5 516 517 518 521
1330 6 516 517 518 528
1331 54 337 340 343 344
1332 54 337 340 343 345
1333 55 337 340 343 346
1334 53 341 340 343 344
1335 53 341 340 343 345
1336 56 341 340 343 346
1337 53 342 340 343 344
1338 53 342 340 343 345
1339 56 342 340 343 346
1340 62 523 583 584 585
1341 63 523 583 584 588
1342 64 582 583 584 585
1343 65 582 583 584 588
1344 34 519 530 531 532
1345 34 519 530 531 533
1346 35 519 530 531 534
1347 36 530 531 534 535
1348 37 530 531 534 536
1349 37 530 531 534 543
1350 38 532 531 534 535
1351 39 532 531 534 536
1352 39 532 531 534 543
1353 38 533 531 534 535
1354 39 533 531 534 536
1355 39 533 531 534 543
1356 49 534 536 539 540
1357 49 534 536 539 541
1358 49 534 536 539 542
1359 50 537 536 539 540
1360 50 537 536 539 541
1361 50 537 536 539 542
1362 50 538 536 539 540
1363 50 538 536 539 541
1364 50 538 536 539 542
1365 40 531 534 536 537
1366 40 531 534 536 538
1367 41 531 534 536 539
1368 42 535 534 536 537
1369 42 535 534 536 538
1370 43 535 534 536 539
1371 44 543 534 536 537
1372 44 543 534 536 538
1373 45 543 534 536 539
1374 40 531 534 543 544
1375 40 531 534 543 545
1376 46 531 534 543 546
1377 42 535 534 543 544
1378 42 535 534 543 545
1379 47 535 534 543 546
1380 44 536 534 543 544
1381 44 536 534 543 545
1382 48 536 534 543 546
1383 34 422 453 454 455
1384 34 422 453 454 456
1385 35 422 453 454 457
1386 1 526 522 523 524
1387 27 526 522 523 583
1388 4 523 522 526 519
1389 3 523 522 526 527
1390 5 522 523 524 527
1391 6 522 523 524 529
1392 28 583 523 524 527
1393 29 583 523 524 529
1394 30 522 523 583 582
1395 31 522 523 583 584
1396 32 524 523 583 582
1397 33 524 523 583 584
1398 9 523 524 527 525
1399 10 523 524 527 526
1400 11 529 524 527 525
1401 12 529 524 527 526
1402 25 519 526 527 524
1403 26 519 526 527 525
1404 23 522 526 527 524
1405 24 522 526 527 525
1406 13 520 525 527 524
1407 14 520 525 527 526
1408 15 556 525 527 524
1409 16 556 525 527 526
1410 22 520 525 556 557
1411 21 527 525 556 557
1412 34 525 556 557 558
1413 34 525 556 557 559
1414 35 525 556 557 560
1415 36 556 557 560 561
1416 37 556 557 560 562
1417 37 556 557 560 569
1418 38 558 557 560 561
1419 39 558 557 560 562
1420 39 558 557 560 569
1421 38 559 557 560 561
1422 39 559 557 560 562
1423 39 559 557 560 569
1424 13 526 519 521 518
1425 14 526 519 521 520
1426 15 530 519 521 518
1427 16 530 519 521 520
1428 17 521 519 526 522
1429 18 521 519 526 527
1430 19 530 519 526 522
1431 20 530 519 526 527
1432 21 521 519 530 531
1433 22 526 519 530 531
1434 23 516 520 521 518
1435 24 516 520 521 519
1436 25 525 520 521 518
1437 26 525 520 521 519
1438 17 516 520 525 527
1439 19 516 520 525 556
1440 18 521 520 525 527
1441 20 521 520 525 556
1442 114 520 516 517 486
1443 1 520 516 517 518
1444 3 517 516 520 521
1445 4 517 516 520 525
1446 72 275 276 277 278
1447 73 275 276 277 284
1448 54 569 572 575 576
1449 54 569 572 575 577
1450 55 569 572 575 578
1451 53 573 572 575 576
1452 53 573 572 575 577
1453 56 573 572 575 578
1454 53 574 572 575 576
1455 53 574 572 575 577
1456 56 574 572 575 578
1457 51 560 569 572 573
1458 51 560 569 572 574
1459 52 560 569 572 575
1460 53 570 569 572 573
1461 53 570 569 572 574
1462 54 570 569 572 575
1463 53 571 569 572 573
1464 53 571 569 572 574
1465 54 571 569 572 575
1466 57 572 575 578 579
1467 57 572 575 578 580
1468 57 572 575 578 581
1469 50 576 575 578 579
1470 50 576 575 578 580
1471 50 576 575 578 581
1472 50 577 575 578 579
1473 50 577 575 578 580
1474 50 577 575 578 581
1475 40 557 560 562 563
1476 40 557 560 562 564
1477 41 557 560 562 565
1478 42 561 560 562 563
1479 42 561 560 562 564
1480 43 561 560 562 565
1481 44 569 560 562 563
1482 44 569 560 562 564
1483 45 569 560 562 565
1484 40 557 560 569 570
1485 40 557 560 569 571
1486 46 557 560 569 572
1487 42 561 560 569 570
1488 42 561 560 569 571
1489 47 561 560 569 572
1490 44 562 560 569 570
1491 44 562 560 569 571
1492 48 562 560 569 572
1493 49 560 562 565 566
1494 49 560 562 565 567
1495 49 560 562 565 568
1496 50 563 562 565 566
1497 50 563 562 565 567
1498 50 563 562 565 568
1499 50 564 562 565 566
1500 50 564 562 565 567
1501 50 564 562 565 568
1502 57 469 472 475 476
1503 57 469 472 475 477
1504 57 469 472 475 478
1505 50 473 472 475 476
1506 50 473 472 475 477
1507 50 473 472 475 478
1508 50 474 472 475 476
1509 50 474 472 475 477
1510 50 474 472 475 478
1511 54 466 469 472 473
1512 54 466 469 472 474
1513 55 466 469 472 475
1514 53 470 469 472 473
1515 53 470 469 472 474
1516 56 470 469 472 475
1517 53 471 469 472 473
1518 53 471 469 472 474
1519 56 471 469 472 475
1520 51 457 466 469 470
1521 51 457 466 469 471
1522 52 457 466 469 472
1523 53 467 466 469 470
1524 53 467 466 469 471
1525 54 467 466 469 472
1526 53 468 466 469 470
1527 53 468 466 469 471
1528 54 468 466 469 472
1529 40 454 457 459 460
1530 40 454 457 459 461
1531 41 454 457 459 462
1532 42 458 457 459 460
1533 42 458 457 459 461
1534 43 458 457 459 462
1535 44 466 457 459 460
1536 44 466 457 459 461
1537 45 466 457 459 462
1538 40 454 457 466 467
1539 40 454 457 466 468
1540 46 454 457 466 469
1541 42 458 457 466 467
1542 42 458 457 466 468
1543 47 458 457 466 469
1544 44 459 457 466 467
1545 44 459 457 466 468
1546 48 459 457 466 469
1547 98 1210 1212 1215 1216
1548 99 1210 1212 1215 1217
1549 99 1210 1212 1215 1224
1550 100 1213 1212 1215 1216
1551 101 1213 1212 1215 1217
1552 101 1213 1212 1215 1224
1553 100 1214 1212 1215 1216
1554 101 1214 1212 1215 1217
1555 101 1214 1212 1215 1224
1556 86 275 279 280 273
1557 87 275 279 280 311
1558 88 278 279 280 273
1559 89 278 279 280 311
1560 54 297 300 303 304
1561 54 297 300 303 305
1562 55 297 300 303 306
1563 53 301 300 303 304
1564 53 301 300 303 305
1565 56 301 300 303 306
1566 53 302 300 303 304
1567 53 302 300 303 305
1568 56 302 300 303 306
1569 102 1212 1215 1217 1218
1570 102 1212 1215 1217 1219
1571 103 1212 1215 1217 1220
1572 104 1216 1215 1217 1218
1573 104 1216 1215 1217 1219
1574 105 1216 1215 1217 1220
1575 106 1224 1215 1217 1218
1576 106 1224 1215 1217 1219
1577 107 1224 1215 1217 1220
1578 102 1212 1215 1224 1225
1579 102 1212 1215 1224 1226
1580 108 1212 1215 1224 1227
1581 104 1216 1215 1224 1225
1582 104 1216 1215 1224 1226
1583 109 1216 1215 1224 1227
1584 106 1217 1215 1224 1225
1585 106 1217 1215 1224 1226
1586 110 1217 1215 1224 1227
1587 94 285 283 284 277
1588 95 285 283 284 282
1589 96 284 283 285 286
1590 96 284 283 285 287
1591 97 284 283 285 288
1592 98 283 285 288 289
1593 99 283 285 288 290
1594 99 283 285 288 297
1595 100 286 285 288 289
1596 101 286 285 288 290
1597 101 286 285 288 297
1598 100 287 285 288 289
1599 101 287 285 288 290
1600 101 287 285 288 297
1601 74 276 277 278 279
1602 75 276 277 278 281
1603 76 284 277 278 279
1604 77 284 277 278 281
1605 78 276 277 284 282
1606 79 276 277 284 283
1607 80 278 277 284 282
1608 81 278 277 284 283
1609 112 288 297 300 301
1610 112 288 297 300 302
1611 113 288 297 300 303
1612 53 298 297 300 301
1613 53 298 297 300 302
1614 54 298 297 300 303
1615 53 299 297 300 301
1616 53 299 297 300 302
1617 54 299 297 300 303
1618 111 288 290 293 294
1619 111 288 290 293 295
1620 111 288 290 293 296
1621 50 291 290 293 294
1622 50 291 290 293 295
1623 50 291 290 293 296
1624 50 292 290 293 294
1625 50 292 290 293 295
1626 50 292 290 293 296
1627 102 285 288 290 291
1628 102 285 288 290 292
1629 103 285 288 290 293
1630 104 289 288 290 291
1631 104 289 288 290 292
1632 105 289 288 290 293
1633 106 297 288 290 291
1634 106 297 288 290 292
1635 107 297 288 290 293
1636 102 285 288 297 298
1637 102 285 288 297 299
1638 108 285 288 297 300
1639 104 289 288 297 298
1640 104 289 288 297 299
1641 109 289 288 297 300
1642 106 290 288 297 298
1643 106 290 288 297 299
1644 110 290 288 297 300
1645 57 134 137 140 141
1646 57 134 137 140 142
1647 57 134 137 140 143
1648 50 138 137 140 141
1649 50 138 137 140 142
1650 50 138 137 140 143
1651 50 139 137 140 141
1652 50 139 137 140 142
1653 50 139 137 140 143
1654 54 131 134 137 138
1655 54 131 134 137 139
1656 55 131 134 137 140
1657 53 135 134 137 138
1658 53 135 134 137 139
1659 56 135 134 137 140
1660 53 136 134 137 138
1661 53 136 134 137 139
1662 56 136 134 137 140
1663 74 1203 1204 1205 1206
1664 75 1203 1204 1205 1208
1665 76 1211 1204 1205 1206
1666 77 1211 1204 1205 1208
1667 78 1203 1204 1211 1209
1668 79 1203 1204 1211 1210
1669 80 1205 1204 1211 1209
1670 81 1205 1204 1211 1210
1671 36 453 454 457 458
1672 37 453 454 457 459
1673 37 453 454 457 466
1674 38 455 454 457 458
1675 39 455 454 457 459
1676 39 455 454 457 466
1677 38 456 454 457 458
1678 39 456 454 457 459
1679 39 456 454 457 466
1680 82 277 278 279 275
1681 83 277 278 279 280
1682 84 281 278 279 275
1683 85 281 278 279 280
1684 57 649 652 655 656
1685 57 649 652 655 657
1686 57 649 652 655 658
1687 50 653 652 655 656
1688 50 653 652 655 657
1689 50 653 652 655 658
1690 50 654 652 655 656
1691 50 654 652 655 657
1692 50 654 652 655 658
1693 54 646 649 652 653
1694 54 646 649 652 654
1695 55 646 649 652 655
1696 53 650 649 652 653
1697 53 650 649 652 654
1698 56 650 649 652 655
1699 53 651 649 652 653
1700 53 651 649 652 654
1701 56 651 649 652 655
1702 23 619 623 624 621
1703 24 619 623 624 622
1704 25 628 623 624 621
1705 26 628 623 624 622
1706 17 619 623 628 630
1707 19 619 623 628 659
1708 18 624 623 628 630
1709 20 624 623 628 659
1710 114 623 619 620 589
1711 1 623 619 620 621
1712 3 620 619 623 624
1713 4 620 619 623 628
1714 13 623 628 630 627
1715 14 623 628 630 629
1716 15 659 628 630 627
1717 16 659 628 630 629
1718 22 623 628 659 660
1719 21 630 628 659 660
1720 34 628 659 660 661
1721 34 628 659 660 662
1722 35 628 659 660 663
1723 36 659 660 663 664
1724 37 659 660 663 665
1725 37 659 660 663 672
1726 38 661 660 663 664
1727 39 661 660 663 665
1728 39 661 660 663 672
1729 38 662 660 663 664
1730 39 662 660 663 665
1731 39 662 660 663 672
1732 72 584 585 586 587
1733 73 584 585 586 593
1734 13 629 622 624 621
1735 14 629 622 624 623
1736 15 633 622 624 621
1737 16 633 622 624 623
1738 17 624 622 629 625
1739 18 624 622 629 630
1740 19 633 622 629 625
1741 20 633 622 629 630
1742 21 624 622 633 634
1743 22 629 622 633 634
1744 58 589 582 583 523
1745 59 589 582 583 584
1746 60 583 582 589 588
1747 61 583 582 589 620
1748 66 583 584 585 586
1749 67 588 584 585 586
1750 68 583 584 588 587
1751 69 583 584 588 589
1752 70 585 584 588 587
1753 71 585 584 588 589
1754 74 585 586 587 588
1755 75 585 586 587 590
1756 76 593 586 587 588
1757 77 593 586 587 590
1758 78 585 586 593 591
1759 79 585 586 593 592
1760 80 587 586 593 591
1761 81 587 586 593 592
1762 82 586 587 588 584
1763 83 586 587 588 589
1764 84 590 587 588 584
1765 85 590 587 588 589
1766 86 584 588 589 582
1767 87 584 588 589 620
1768 88 587 588 589 582
1769 89 587 588 589 620
1770 90 582 589 620 619
1771 91 582 589 620 621
1772 92 588 589 620 619
1773 93 588 589 620 621
1774 115 589 620 621 624
1775 116 589 620 621 631
1776 5 619 620 621 624
1777 6 619 620 621 631
1778 9 620 621 624 622
1779 10 620 621 624 623
1780 11 631 621 624 622
1781 12 631 621 624 623
1782 34 622 633 634 635
1783 34 622 633 634 636
1784 35 622 633 634 637
1785 111 597 599 602 603
1786 111 597 599 602 604
1787 111 597 599 602 605
1788 50 600 599 602 603
1789 50 600 599 602 604
1790 50 600 599 602 605
1791 50 601 599 602 603
1792 50 601 599 602 604
1793 50 601 599 602 605
1794 98 592 594 597 598
1795 99 592 594 597 599
1796 99 592 594 597 606
1797 100 595 594 597 598
1798 101 595 594 597 599
1799 101 595 594 597 606
1800 100 596 594 597 598
1801 101 596 594 597 599
1802 101 596 594 597 606
1803 94 594 592 593 586
1804 95 594 592 593 591
1805 96 593 592 594 595
1806 96 593 592 594 596
1807 97 593 592 594 597
1808 102 594 597 599 600
1809 102 594 597 599 601
1810 103 594 597 599 602
1811 104 598 597 599 600
1812 104 598 597 599 601
1813 105 598 597 599 602
1814 106 606 597 599 600
1815 106 606 597 599 601
1816 107 606 597 599 602
1817 102 594 597 606 607
1818 102 594 597 606 608
1819 108 594 597 606 609
1820 104 598 597 606 607
1821 104 598 597 606 608
1822 109 598 597 606 609
1823 106 599 597 606 607
1824 106 599 597 606 608
1825 110 599 597 606 609
1826 112 597 606 609 610
1827 112 597 606 609 611
1828 113 597 606 609 612
1829 53 607 606 609 610
1830 53 607 606 609 611
1831 54 607 606 609 612
1832 53 608 606 609 610
1833 53 608 606 609 611
1834 54 608 606 609 612
1835 54 672 675 678 679
1836 54 672 675 678 680
1837 55 672 675 678 681
1838 53 676 675 678 679
1839 53 676 675 678 680
1840 56 676 675 678 681
1841 53 677 675 678 679
1842 53 677 675 678 680
1843 56 677 675 678 681
1844 57 675 678 681 682
1845 57 675 678 681 683
1846 57 675 678 681 684
1847 50 679 678 681 682
1848 50 679 678 681 683
1849 50 679 678 681 684
1850 50 680 678 681 682
1851 50 680 678 681 683
1852 50 680 678 681 684
1853 40 660 663 665 666
1854 40 660 663 665 667
1855 41 660 663 665 668
1856 42 664 663 665 666
1857 42 664 663 665 667
1858 43 664 663 665 668
1859 44 672 663 665 666
1860 44 672 663 665 667
1861 45 672 663 665 668
1862 40 660 663 672 673
1863 40 660 663 672 674
1864 46 660 663 672 675
1865 42 664 663 672 673
1866 42 664 663 672 674
1867 47 664 663 672 675
1868 44 665 663 672 673
1869 44 665 663 672 674
1870 48 665 663 672 675
1871 49 663 665 668 669
1872 49 663 665 668 670
1873 49 663 665 668 671
1874 50 666 665 668 669
1875 50 666 665 668 670
1876 50 666 665 668 671
1877 50 667 665 668 669
1878 50 667 665 668 670
1879 50 667 665 668 671
1880 51 637 646 649 650
1881 51 637 646 649 651
1882 52 637 646 649 652
1883 53 647 646 649 650
1884 53 647 646 649 651
1885 54 647 646 649 652
1886 53 648 646 649 650
1887 53 648 646 649 651
1888 54 648 646 649 652
1889 40 634 637 639 640
1890 40 634 637 639 641
1891 41 634 637 639 642
1892 42 638 637 639 640
1893 42 638 637 639 641
1894 43 638 637 639 642
1895 44 646 637 639 640
1896 44 646 637 639 641
1897 45 646 637 639 642
1898 40 634 637 646 647
1899 40 634 637 646 648
1900 46 634 637 646 649
1901 42 638 637 646 647
1902 42 638 637 646 648
1903 47 638 637 646 649
1904 44 639 637 646 647
1905 44 639 637 646 648
1906 48 639 637 646 649
1907 49 766 768 771 772
1908 49 766 768 771 773
1909 49 766 768 771 774
1910 50 769 768 771 772
1911 50 769 768 771 773
1912 50 769 768 771 774
1913 50 770 768 771 772
1914 50 770 768 771 773
1915 50 770 768 771 774
1916 114 726 722 723 692
1917 1 726 722 723 724
1918 3 723 722 726 727
1919 4 723 722 726 731
1920 40 763 766 768 769
1921 40 763 766 768 770
1922 41 763 766 768 771
1923 42 767 766 768 769
1924 42 767 766 768 770
1925 43 767 766 768 771
1926 44 775 766 768 769
1927 44 775 766 768 770
1928 45 775 766 768 771
1929 40 763 766 775 776
1930 40 763 766 775 777
1931 46 763 766 775 778
1932 42 767 766 775 776
1933 42 767 766 775 777
1934 47 767 766 775 778
1935 44 768 766 775 776
1936 44 768 766 775 777
1937 48 768 766 775 778
1938 36 762 763 766 767
1939 37 762 763 766 768
1940 37 762 763 766 775
1941 38 764 763 766 767
1942 39 764 763 766 768
1943 39 764 763 766 775
1944 38 765 763 766 767
1945 39 765 763 766 768
1946 39 765 763 766 775
1947 54 775 778 781 782
1948 54 775 778 781 783
1949 55 775 778 781 784
1950 53 779 778 781 782
1951 53 779 778 781 783
1952 56 779 778 781 784
1953 53 780 778 781 782
1954 53 780 778 781 783
1955 56 780 778 781 784
1956 57 778 781 784 785
1957 57 778 781 784 786
1958 57 778 781 784 787
1959 50 782 781 784 785
1960 50 782 781 784 786
1961 50 782 781 784 787
1962 50 783 781 784 785
1963 50 783 781 784 786
1964 50 783 781 784 787
1965 51 766 775 778 779
1966 51 766 775 778 780
1967 52 766 775 778 781
1968 53 776 775 778 779
1969 53 776 775 778 780
1970 54 776 775 778 781
1971 53 777 775 778 779
1972 53 777 775 778 780
1973 54 777 775 778 781
1974 34 731 762 763 764
1975 34 731 762 763 765
1976 35 731 762 763 766
1977 72 687 688 689 690
1978 73 687 688 689 696
1979 25 622 629 630 627
1980 26 622 629 630 628
1981 23 625 629 630 627
1982 24 625 629 630 628
1983 1 629 625 626 627
1984 27 629 625 626 686
1985 4 626 625 629 622
1986 3 626 625 629 630
1987 9 626 627 630 628
1988 10 626 627 630 629
1989 11 632 627 630 628
1990 12 632 627 630 629
1991 62 626 686 687 688
1992 63 626 686 687 691
1993 64 685 686 687 688
1994 65 685 686 687 691
1995 5 625 626 627 630
1996 6 625 626 627 632
1997 28 686 626 627 630
1998 29 686 626 627 632
1999 30 625 626 686 685
2000 31 625 626 686 687
2001 32 627 626 686 685
2002 33 627 626 686 687
2003 58 692 685 686 626
2004 59 692 685 686 687
2005 60 686 685 692 691
2006 61 686 685 692 723
2007 66 686 687 688 689
2008 67 691 687 688 689
2009 68 686 687 691 690
2010 69 686 687 691 692
2011 70 688 687 691 690
2012 71 688 687 691 692
2013 90 685 692 723 722
2014 91 685 692 723 724
2015 92 691 692 723 722
2016 93 691 692 723 724
2017 51 663 672 675 676
2018 51 663 672 675 677
2019 52 663 672 675 678
2020 53 673 672 675 676
2021 53 673 672 675 677
2022 54 673 672 675 678
2023 53 674 672 675 676
2024 53 674 672 675 677
2025 54 674 672 675 678
2026 49 637 639 642 643
2027 49 637 639 642 644
2028 49 637 639 642 645
2029 50 640 639 642 643
2030 50 640 639 642 644
2031 50 640 639 642 645
2032 50 641 639 642 643
2033 50 641 639 642 644
2034 50 641 639 642 645
2035 36 633 634 637 638
2036 37 633 634 637 639
2037 37 633 634 637 646
2038 38 635 634 637 638
2039 39 635 634 637 639
2040 39 635 634 637 646
2041 38 636 634 637 638
2042 39 636 634 637 639
2043 39 636 634 637 646
2044 54 606 609 612 613
2045 54 606 609 612 614
2046 55 606 609 612 615
2047 53 610 609 612 613
2048 53 610 609 612 614
2049 56 610 609 612 615
2050 53 611 609 612 613
2051 53 611 609 612 614
2052 56 611 609 612 615
2053 57 609 612 615 616
2054 57 609 612 615 617
2055 57 609 612 615 618
2056 50 613 612 615 616
2057 50 613 612 615 617
2058 50 613 612 615 618
2059 50 614 612 615 616
2060 50 614 612 615 617
2061 50 614 612 615 618
2062 111 700 702 705 706
2063 111 700 702 705 707
2064 111 700 702 705 708
2065 50 703 702 705 706
2066 50 703 702 705 707
2067 50 703 702 705 708
2068 50 704 702 705 706
2069 50 704 702 705 707
2070 50 704 702 705 708
2071 57 712 715 718 719
2072 57 712 715 718 720
2073 57 712 715 718 721
2074 50 716 715 718 719
2075 50 716 715 718 720
2076 50 716 715 718 721
2077 50 717 715 718 719
2078 50 717 715 718 720
2079 50 717 715 718 721
2080 94 697 695 696 689
2081 95 697 695 696 694
2082 96 696 695 697 698
2083 96 696 695 697 699
2084 97 696 695 697 700
2085 98 695 697 700 701
2086 99 695 697 700 702
2087 99 695 697 700 709
2088 100 698 697 700 701
2089 101 698 697 700 702
2090 101 698 697 700 709
2091 100 699 697 700 701
2092 101 699 697 700 702
2093 101 699 697 700 709
2094 54 709 712 715 716
2095 54 709 712 715 717
2096 55 709 712 715 718
2097 53 713 712 715 716
2098 53 713 712 715 717
2099 56 713 712 715 718
2100 53 714 712 715 716
2101 53 714 712 715 717
2102 56 714 712 715 718
2103 102 697 700 702 703
2104 102 697 700 702 704
2105 103 697 700 702 705
2106 104 701 700 702 703
2107 104 701 700 702 704
2108 105 701 700 702 705
2109 106 709 700 702 703
2110 106 709 700 702 704
2111 107 709 700 702 705
2112 102 697 700 709 710
2113 102 697 700 709 711
2114 108 697 700 709 712
2115 104 701 700 709 710
2116 104 701 700 709 711
2117 109 701 700 709 712
2118 106 702 700 709 710
2119 106 702 700 709 711
2120 110 702 700 709 712
2121 112 700 709 712 713
2122 112 700 709 712 714
2123 113 700 709 712 715
2124 53 710 709 712 713
2125 53 710 709 712 714
2126 54 710 709 712 715
2127 53 711 709 712 713
2128 53 711 709 712 714
2129 54 711 709 712 715
2130 62 729 789 790 791
2131 63 729 789 790 794
2132 64 788 789 790 791
2133 65 788 789 790 794
2134 66 789 790 791 792
2135 67 794 790 791 792
2136 68 789 790 794 793
2137 69 789 790 794 795
2138 70 791 790 794 793
2139 71 791 790 794 795
2140 25 725 732 733 730
2141 26 725 732 733 731
2142 23 728 732 733 730
2143 24 728 732 733 731
2144 13 732 725 727 724
2145 14 732 725 727 726
2146 15 736 725 727 724
2147 16 736 725 727 726
2148 17 727 725 732 728
2149 18 727 725 732 733
2150 19 736 725 732 728
2151 20 736 725 732 733
2152 21 727 725 736 737
2153 22 732 725 736 737
2154 34 725 736 737 738
2155 34 725 736 737 739
2156 35 725 736 737 740
2157 1 732 728 729 730
2158 27 732 728 729 789
2159 4 729 728 732 725
2160 3 729 728 732 733
2161 23 722 726 727 724
2162 24 722 726 727 725
2163 25 731 726 727 724
2164 26 731 726 727 725
2165 17 722 726 731 733
2166 19 722 726 731 762
2167 18 727 726 731 733
2168 20 727 726 731 762
2169 13 726 731 733 730
2170 14 726 731 733 732
2171 15 762 731 733 730
2172 16 762 731 733 732
2173 22 726 731 762 763
2174 21 733 731 762 763
2175 5 728 729 730 733
2176 6 728 729 730 735
2177 28 789 729 730 733
2178 29 789 729 730 735
2179 30 728 729 789 788
2180 31 728 729 789 790
2181 32 730 729 789 788
2182 33 730 729 789 790
2183 9 729 730 733 731
2184 10 729 730 733 732
2185 11 735 730 733 731
2186 12 735 730 733 732
2187 36 736 737 740 741
2188 37 736 737 740 742
2189 37 736 737 740 749
2190 38 738 737 740 741
2191 39 738 737 740 742
2192 39 738 737 740 749
2193 38 739 737 740 741
2194 39 739 737 740 742
2195 39 739 737 740 749
2196 115 692 723 724 727
2197 116 692 723 724 734
2198 5 722 723 724 727
2199 6 722 723 724 734
2200 9 723 724 727 725
2201 10 723 724 727 726
2202 11 734 724 727 725
2203 12 734 724 727 726
2204 74 688 689 690 691
2205 75 688 689 690 693
2206 76 696 689 690 691
2207 77 696 689 690 693
2208 78 688 689 696 694
2209 79 688 689 696 695
2210 80 690 689 696 694
2211 81 690 689 696 695
2212 82 689 690 691 687
2213 83 689 690 691 692
2214 84 693 690 691 687
2215 85 693 690 691 692
2216 86 687 691 692 685
2217 87 687 691 692 723
2218 88 690 691 692 685
2219 89 690 691 692 723
2220 58 795 788 789 729
2221 59 795 788 789 790
2222 60 789 788 795 794
2223 61 789 788 795 826
2224 114 829 825 826 795
2225 1 829 825 826 827
2226 3 826 825 829 830
2227 4 826 825 829 834
2228 34 834 865 866 867
2229 34 834 865 866 868
2230 35 834 865 866 869
2231 36 865 866 869 870
2232 37 865 866 869 871
2233 37 865 866 869 878
2234 38 867 866 869 870
2235 39 867 866 869 871
2236 39 867 866 869 878
2237 38 868 866 869 870
2238 39 868 866 869 871
2239 39 868 866 869 878
2240 13 829 834 836 833
2241 14 829 834 836 835
2242 15 865 834 836 833
2243 16 865 834 836 835
2244 22 829 834 865 866
2245 21 836 834 865 866
2246 90 788 795 826 825
2247 91 788 795 826 827
2248 92 794 795 826 825
2249 93 794 795 826 827
2250 57 881 884 887 888
2251 57 881 884 887 889
2252 57 881 884 887 890
2253 50 885 884 887 888
2254 50 885 884 887 889
2255 50 885 884 887 890
2256 50 886 884 887 888
2257 50 886 884 887 889
2258 50 886 884 887 890
2259 54 878 881 884 885
2260 54 878 881 884 886
2261 55 878 881 884 887
2262 53 882 881 884 885
2263 53 882 881 884 886
2264 56 882 881 884 887
2265 53 883 881 884 885
2266 53 883 881 884 886
2267 56 883 881 884 887
2268 40 866 869 871 872
2269 40 866 869 871 873
2270 41 866 869 871 874
2271 42 870 869 871 872
2272 42 870 869 871 873
2273 43 870 869 871 874
2274 44 878 869 871 872
2275 44 878 869 871 873
2276 45 878 869 871 874
2277 40 866 869 878 879
2278 40 866 869 878 880
2279 46 866 869 878 881
2280 42 870 869 878 879
2281 42 870 869 878 880
2282 47 870 869 878 881
2283 44 871 869 878 879
2284 44 871 869 878 880
2285 48 871 869 878 881
2286 51 869 878 881 882
2287 51 869 878 881 883
2288 52 869 878 881 884
2289 53 879 878 881 882
2290 53 879 878 881 883
2291 54 879 878 881 884
2292 53 880 878 881 882
2293 53 880 878 881 883
2294 54 880 878 881 884
2295 49 869 871 874 875
2296 49 869 871 874 876
2297 49 869 871 874 877
2298 50 872 871 874 875
2299 50 872 871 874 876
2300 50 872 871 874 877
2301 50 873 871 874 875
2302 50 873 871 874 876
2303 50 873 871 874 877
2304 40 943 946 948 949
2305 40 943 946 948 950
2306 41 943 946 948 951
2307 42 947 946 948 949
2308 42 947 946 948 950
2309 43 947 946 948 951
2310 44 955 946 948 949
2311 44 955 946 948 950
2312 45 955 946 948 951
2313 40 943 946 955 956
2314 40 943 946 955 957
2315 46 943 946 955 958
2316 42 947 946 955 956
2317 42 947 946 955 957
2318 47 947 946 955 958
2319 44 948 946 955 956
2320 44 948 946 955 957
2321 48 948 946 955 958
2322 36 942 943 946 947
2323 37 942 943 946 948
2324 37 942 943 946 955
2325 38 944 943 946 947
2326 39 944 943 946 948
2327 39 944 943 946 955
2328 38 945 943 946 947
2329 39 945 943 946 948
2330 39 945 943 946 955
2331 49 946 948 951 952
2332 49 946 948 951 953
2333 49 946 948 951 954
2334 50 949 948 951 952
2335 50 949 948 951 953
2336 50 949 948 951 954
2337 50 950 948 951 952
2338 50 950 948 951 953
2339 50 950 948 951 954
2340 54 955 958 961 962
2341 54 955 958 961 963
2342 55 955 958 961 964
2343 53 959 958 961 962
2344 53 959 958 961 963
2345 56 959 958 961 964
2346 53 960 958 961 962
2347 53 960 958 961 963
2348 56 960 958 961 964
2349 51 946 955 958 959
2350 51 946 955 958 960
2351 52 946 955 958 961
2352 53 956 955 958 959
2353 53 956 955 958 960
2354 54 956 955 958 961
2355 53 957 955 958 959
2356 53 957 955 958 960
2357 54 957 955 958 961
2358 57 958 961 964 965
2359 57 958 961 964 966
2360 57 958 961 964 967
2361 50 962 961 964 965
2362 50 962 961 964 966
2363 50 962 961 964 967
2364 50 963 961 964 965
2365 50 963 961 964 966
2366 50 963 961 964 967
2367 57 815 818 821 822
2368 57 815 818 821 823
2369 57 815 818 821 824
2370 50 819 818 821 822
2371 50 819 818 821 823
2372 50 819 818 821 824
2373 50 820 818 821 822
2374 50 820 818 821 823
2375 50 820 818 821 824
2376 54 812 815 818 819
2377 54 812 815 818 820
2378 55 812 815 818 821
2379 53 816 815 818 819
2380 53 816 815 818 820
2381 56 816 815 818 821
2382 53 817 815 818 819
2383 53 817 815 818 820
2384 56 817 815 818 821
2385 98 798 800 803 804
2386 99 798 800 803 805
2387 99 798 800 803 812
2388 100 801 800 803 804
2389 101 801 800 803 805
2390 101 801 800 803 812
2391 100 802 800 803 804
2392 101 802 800 803 805
2393 101 802 800 803 812
2394 74 791 792 793 794
2395 75 791 792 793 796
2396 76 799 792 793 794
2397 77 799 792 793 796
2398 78 791 792 799 797
2399 79 791 792 799 798
2400 80 793 792 799 797
2401 81 793 792 799 798
2402 82 792 793 794 790
2403 83 792 793 794 795
2404 84 796 793 794 790
2405 85 796 793 794 795
2406 86 790 794 795 788
2407 87 790 794 795 826
2408 88 793 794 795 788
2409 89 793 794 795 826
2410 72 790 791 792 793
2411 73 790 791 792 799
2412 94 800 798 799 792
2413 95 800 798 799 797
2414 96 799 798 800 801
2415 96 799 798 800 802
2416 97 799 798 800 803
2417 112 803 812 815 816
2418 112 803 812 815 817
2419 113 803 812 815 818
2420 53 813 812 815 816
2421 53 813 812 815 817
2422 54 813 812 815 818
2423 53 814 812 815 816
2424 53 814 812 815 817
2425 54 814 812 815 818
2426 102 800 803 805 806
2427 102 800 803 805 807
2428 103 800 803 805 808
2429 104 804 803 805 806
2430 104 804 803 805 807
2431 105 804 803 805 808
2432 106 812 803 805 806
2433 106 812 803 805 807
2434 107 812 803 805 808
2435 102 800 803 812 813
2436 102 800 803 812 814
2437 108 800 803 812 815
2438 104 804 803 812 813
2439 104 804 803 812 814
2440 109 804 803 812 815
2441 106 805 803 812 813
2442 106 805 803 812 814
2443 110 805 803 812 815
2444 54 749 752 755 756
2445 54 749 752 755 757
2446 55 749 752 755 758
2447 53 753 752 755 756
2448 53 753 752 755 757
2449 56 753 752 755 758
2450 53 754 752 755 756
2451 53 754 752 755 757
2452 56 754 752 755 758
2453 57 752 755 758 759
2454 57 752 755 758 760
2455 57 752 755 758 761
2456 50 756 755 758 759
2457 50 756 755 758 760
2458 50 756 755 758 761
2459 50 757 755 758 759
2460 50 757 755 758 760
2461 50 757 755 758 761
2462 51 740 749 752 753
2463 51 740 749 752 754
2464 52 740 749 752 755
2465 53 750 749 752 753
2466 53 750 749 752 754
2467 54 750 749 752 755
2468 53 751 749 752 753
2469 53 751 749 752 754
2470 54 751 749 752 755
2471 111 803 805 808 809
2472 111 803 805 808 810
2473 111 803 805 808 811
2474 50 806 805 808 809
2475 50 806 805 808 810
2476 50 806 805 808 811
2477 50 807 805 808 809
2478 50 807 805 808 810
2479 50 807 805 808 811
2480 49 740 742 745 746
2481 49 740 742 745 747
2482 49 740 742 745 748
2483 50 743 742 745 746
2484 50 743 742 745 747
2485 50 743 742 745 748
2486 50 744 742 745 746
2487 50 744 742 745 747
2488 50 744 742 745 748
2489 40 737 740 742 743
2490 40 737 740 742 744
2491 41 737 740 742 745
2492 42 741 740 742 743
2493 42 741 740 742 744
2494 43 741 740 742 745
2495 44 749 740 742 743
2496 44 749 740 742 744
2497 45 749 740 742 745
2498 40 737 740 749 750
2499 40 737 740 749 751
2500 46 737 740 749 752
2501 42 741 740 749 750
2502 42 741 740 749 751
2503 47 741 740 749 752
2504 44 742 740 749 750
2505 44 742 740 749 751
2506 48 742 740 749 752
2507 115 795 826 827 830
2508 116 795 826 827 837
2509 5 825 826 827 830
2510 6 825 826 827 837
2511 9 826 827 830 828
2512 10 826 827 830 829
2513 11 837 827 830 828
2514 12 837 827 830 829
2515 23 825 829 830 827
2516 24 825 829 830 828
2517 25 834 829 830 827
2518 26 834 829 830 828
2519 17 825 829 834 836
2520 19 825 829 834 865
2521 18 830 829 834 836
2522 20 830 829 834 865
2523 13 835 828 830 827
2524 14 835 828 830 829
2525 15 839 828 830 827
2526 16 839 828 830 829
2527 17 830 828 835 831
2528 18 830 828 835 836
2529 19 839 828 835 831
2530 20 839 828 835 836
2531 21 830 828 839 840
2532 22 835 828 839 840
2533 34 828 839 840 841
2534 34 828 839 840 842
2535 35 828 839 840 843
2536 25 828 835 836 833
2537 26 828 835 836 834
2538 23 831 835 836 833
2539 24 831 835 836 834
2540 36 839 840 843 844
2541 37 839 840 843 845
2542 37 839 840 843 852
2543 38 841 840 843 844
2544 39 841 840 843 845
2545 39 841 840 843 852
2546 38 842 840 843 844
2547 39 842 840 843 845
2548 39 842 840 843 852
2549 40 840 843 845 846
2550 40 840 843 845 847
2551 41 840 843 845 848
2552 42 844 843 845 846
2553 42 844 843 845 847
2554 43 844 843 845 848
2555 44 852 843 845 846
2556 44 852 843 845 847
2557 45 852 843 845 848
2558 40 840 843 852 853
2559 40 840 843 852 854
2560 46 840 843 852 855
2561 42 844 843 852 853
2562 42 844 843 852 854
2563 47 844 843 852 855
2564 44 845 843 852 853
2565 44 845 843 852 854
2566 48 845 843 852 855
2567 51 843 852 855 856
2568 51 843 852 855 857
2569 52 843 852 855 858
2570 53 853 852 855 856
2571 53 853 852 855 857
2572 54 853 852 855 858
2573 53 854 852 855 856
2574 53 854 852 855 857
2575 54 854 852 855 858
2576 57 855 858 861 862
2577 57 855 858 861 863
2578 57 855 858 861 864
2579 50 859 858 861 862
2580 50 859 858 861 863
2581 50 859 858 861 864
2582 50 860 858 861 862
2583 50 860 858 861 863
2584 50 860 858 861 864
2585 9 832 833 836 834
2586 10 832 833 836 835
2587 11 838 833 836 834
2588 12 838 833 836 835
2589 58 898 891 892 832
2590 59 898 891 892 893
2591 60 892 891 898 897
2592 61 892 891 898 929
2593 90 891 898 929 928
2594 91 891 898 929 930
2595 92 897 898 929 928
2596 93 897 898 929 930
2597 86 893 897 898 891
2598 87 893 897 898 929
2599 88 896 897 898 891
2600 89 896 897 898 929
2601 62 832 892 893 894
2602 63 832 892 893 897
2603 64 891 892 893 894
2604 65 891 892 893 897
2605 66 892 893 894 895
2606 67 897 893 894 895
2607 68 892 893 897 896
2608 69 892 893 897 898
2609 70 894 893 897 896
2610 71 894 893 897 898
2611 115 898 929 930 933
2612 116 898 929 930 940
2613 5 928 929 930 933
2614 6 928 929 930 940
2615 82 895 896 897 893
2616 83 895 896 897 898
2617 84 899 896 897 893
2618 85 899 896 897 898
2619 114 932 928 929 898
2620 1 932 928 929 930
2621 3 929 928 932 933
2622 4 929 928 932 937
2623 5 831 832 833 836
2624 6 831 832 833 838
2625 28 892 832 833 836
2626 29 892 832 833 838
2627 30 831 832 892 891
2628 31 831 832 892 893
2629 32 833 832 892 891
2630 33 833 832 892 893
2631 1 835 831 832 833
2632 27 835 831 832 892
2633 4 832 831 835 828
2634 3 832 831 835 836
2635 74 894 895 896 897
2636 75 894 895 896 899
2637 76 902 895 896 897
2638 77 902 895 896 899
2639 78 894 895 902 900
2640 79 894 895 902 901
2641 80 896 895 902 900
2642 81 896 895 902 901
2643 72 893 894 895 896
2644 73 893 894 895 902
2645 94 903 901 902 895
2646 95 903 901 902 900
2647 96 902 901 903 904
2648 96 902 901 903 905
2649 97 902 901 903 906
2650 112 906 915 918 919
2651 112 906 915 918 920
2652 113 906 915 918 921
2653 53 916 915 918 919
2654 53 916 915 918 920
2655 54 916 915 918 921
2656 53 917 915 918 919
2657 53 917 915 918 920
2658 54 917 915 918 921
2659 57 918 921 924 925
2660 57 918 921 924 926
2661 57 918 921 924 927
2662 50 922 921 924 925
2663 50 922 921 924 926
2664 50 922 921 924 927
2665 50 923 921 924 925
2666 50 923 921 924 926
2667 50 923 921 924 927
2668 98 1107 1109 1112 1113
2669 99 1107 1109 1112 1114
2670 99 1107 1109 1112 1121
2671 100 1110 1109 1112 1113
2672 101 1110 1109 1112 1114
2673 101 1110 1109 1112 1121
2674 100 1111 1109 1112 1113
2675 101 1111 1109 1112 1114
2676 101 1111 1109 1112 1121
2677 74 1100 1101 1102 1103
2678 75 1100 1101 1102 1105
2679 76 1108 1101 1102 1103
2680 77 1108 1101 1102 1105
2681 78 1100 1101 1108 1106
2682 79 1100 1101 1108 1107
2683 80 1102 1101 1108 1106
2684 81 1102 1101 1108 1107
2685 94 1109 1107 1108 1101
2686 95 1109 1107 1108 1106
2687 96 1108 1107 1109 1110
2688 96 1108 1107 1109 1111
2689 97 1108 1107 1109 1112
2690 54 1058 1061 1064 1065
2691 54 1058 1061 1064 1066
2692 55 1058 1061 1064 1067
2693 53 1062 1061 1064 1065
2694 53 1062 1061 1064 1066
2695 56 1062 1061 1064 1067
2696 53 1063 1061 1064 1065
2697 53 1063 1061 1064 1066
2698 56 1063 1061 1064 1067
2699 57 1061 1064 1067 1068
2700 57 1061 1064 1067 1069
2701 57 1061 1064 1067 1070
2702 50 1065 1064 1067 1068
2703 50 1065 1064 1067 1069
2704 50 1065 1064 1067 1070
2705 50 1066 1064 1067 1068
2706 50 1066 1064 1067 1069
2707 50 1066 1064 1067 1070
2708 51 1049 1058 1061 1062
2709 51 1049 1058 1061 1063
2710 52 1049 1058 1061 1064
2711 53 1059 1058 1061 1062
2712 53 1059 1058 1061 1063
2713 54 1059 1058 1061 1064
2714 53 1060 1058 1061 1062
2715 53 1060 1058 1061 1063
2716 54 1060 1058 1061 1064
2717 40 1046 1049 1051 1052
2718 40 1046 1049 1051 1053
2719 41 1046 1049 1051 1054
2720 42 1050 1049 1051 1052
2721 42 1050 1049 1051 1053
2722 43 1050 1049 1051 1054
2723 44 1058 1049 1051 1052
2724 44 1058 1049 1051 1053
2725 45 1058 1049 1051 1054
2726 40 1046 1049 1058 1059
2727 40 1046 1049 1058 1060
2728 46 1046 1049 1058 1061
2729 42 1050 1049 1058 1059
2730 42 1050 1049 1058 1060
2731 47 1050 1049 1058 1061
2732 44 1051 1049 1058 1059
2733 44 1051 1049 1058 1060
2734 48 1051 1049 1058 1061
2735 1 1041 1037 1038 1039
2736 27 1041 1037 1038 1098
2737 4 1038 1037 1041 1034
2738 3 1038 1037 1041 1042
2739 72 1099 1100 1101 1102
2740 73 1099 1100 1101 1108
2741 36 1045 1046 1049 1050
2742 37 1045 1046 1049 1051
2743 37 1045 1046 1049 1058
2744 38 1047 1046 1049 1050
2745 39 1047 1046 1049 1051
2746 39 1047 1046 1049 1058
2747 38 1048 1046 1049 1050
2748 39 1048 1046 1049 1051
2749 39 1048 1046 1049 1058
2750 34 1034 1045 1046 1047
2751 34 1034 1045 1046 1048
2752 35 1034 1045 1046 1049
2753 111 1112 1114 1117 1118
2754 111 1112 1114 1117 1119
2755 111 1112 1114 1117 1120
2756 50 1115 1114 1117 1118
2757 50 1115 1114 1117 1119
2758 50 1115 1114 1117 1120
2759 50 1116 1114 1117 1118
2760 50 1116 1114 1117 1119
2761 50 1116 1114 1117 1120
2762 49 1049 1051 1054 1055
2763 49 1049 1051 1054 1056
2764 49 1049 1051 1054 1057
2765 50 1052 1051 1054 1055
2766 50 1052 1051 1054 1056
2767 50 1052 1051 1054 1057
2768 50 1053 1051 1054 1055
2769 50 1053 1051 1054 1056
2770 50 1053 1051 1054 1057
2771 13 1041 1034 1036 1033
2772 14 1041 1034 1036 1035
2773 15 1045 1034 1036 1033
2774 16 1045 1034 1036 1035
2775 17 1036 1034 1041 1037
2776 18 1036 1034 1041 1042
2777 19 1045 1034 1041 1037
2778 20 1045 1034 1041 1042
2779 21 1036 1034 1045 1046
2780 22 1041 1034 1045 1046
2781 9 1032 1033 1036 1034
2782 10 1032 1033 1036 1035
2783 11 1043 1033 1036 1034
2784 12 1043 1033 1036 1035
2785 115 1001 1032 1033 1036
2786 116 1001 1032 1033 1043
2787 5 1031 1032 1033 1036
2788 6 1031 1032 1033 1043
2789 90 994 1001 1032 1031
2790 91 994 1001 1032 1033
2791 92 1000 1001 1032 1031
2792 93 1000 1001 1032 1033
2793 86 996 1000 1001 994
2794 87 996 1000 1001 1032
2795 88 999 1000 1001 994
2796 89 999 1000 1001 1032
2797 34 931 942 943 944
2798 34 931 942 943 945
2799 35 931 942 943 946
2800 13 938 931 933 930
2801 14 938 931 933 932
2802 15 942 931 933 930
2803 16 942 931 933 932
2804 17 933 931 938 934
2805 18 933 931 938 939
2806 19 942 931 938 934
2807 20 942 931 938 939
2808 21 933 931 942 943
2809 22 938 931 942 943
2810 13 932 937 939 936
2811 14 932 937 939 938
2812 15 968 937 939 936
2813 16 968 937 939 938
2814 22 932 937 968 969
2815 21 939 937 968 969
2816 34 937 968 969 970
2817 34 937 968 969 971
2818 35 937 968 969 972
2819 58 1001 994 995 935
2820 59 1001 994 995 996
2821 60 995 994 1001 1000
2822 61 995 994 1001 1032
2823 25 931 938 939 936
2824 26 931 938 939 937
2825 23 934 938 939 936
2826 24 934 938 939 937
2827 1 938 934 935 936
2828 27 938 934 935 995
2829 4 935 934 938 931
2830 3 935 934 938 939
2831 5 934 935 936 939
2832 6 934 935 936 941
2833 28 995 935 936 939
2834 29 995 935 936 941
2835 30 934 935 995 994
2836 31 934 935 995 996
2837 32 936 935 995 994
2838 33 936 935 995 996
2839 9 935 936 939 937
2840 10 935 936 939 938
2841 11 941 936 939 937
2842 12 941 936 939 938
2843 62 935 995 996 997
2844 63 935 995 996 1000
2845 64 994 995 996 997
2846 65 994 995 996 1000
2847 66 995 996 997 998
2848 67 1000 996 997 998
2849 68 995 996 1000 999
2850 69 995 996 1000 1001
2851 70 997 996 1000 999
2852 71 997 996 1000 1001
2853 9 929 930 933 931
2854 10 929 930 933 932
2855 11 940 930 933 931
2856 12 940 930 933 932
2857 23 928 932 933 930
2858 24 928 932 933 931
2859 25 937 932 933 930
2860 26 937 932 933 931
2861 17 928 932 937 939
2862 19 928 932 937 968
2863 18 933 932 937 939
2864 20 933 932 937 968
2865 102 903 906 908 909
2866 102 903 906 908 910
2867 103 903 906 908 911
2868 104 907 906 908 909
2869 104 907 906 908 910
2870 105 907 906 908 911
2871 106 915 906 908 909
2872 106 915 906 908 910
2873 107 915 906 908 911
2874 102 903 906 915 916
2875 102 903 906 915 917
2876 108 903 906 915 918
2877 104 907 906 915 916
2878 104 907 906 915 917
2879 109 907 906 915 918
2880 106 908 906 915 916
2881 106 908 906 915 917
2882 110 908 906 915 918
2883 54 915 918 921 922
2884 54 915 918 921 923
2885 55 915 918 921 924
2886 53 919 918 921 922
2887 53 919 918 921 923
2888 56 919 918 921 924
2889 53 920 918 921 922
2890 53 920 918 921 923
2891 56 920 918 921 924
2892 49 1152 1154 1157 1158
2893 49 1152 1154 1157 1159
2894 49 1152 1154 1157 1160
2895 50 1155 1154 1157 1158
2896 50 1155 1154 1157 1159
2897 50 1155 1154 1157 1160
2898 50 1156 1154 1157 1158
2899 50 1156 1154 1157 1159
2900 50 1156 1154 1157 1160
2901 54 1161 1164 1167 1168
2902 54 1161 1164 1167 1169
2903 55 1161 1164 1167 1170
2904 53 1165 1164 1167 1168
2905 53 1165 1164 1167 1169
2906 56 1165 1164 1167 1170
2907 53 1166 1164 1167 1168
2908 53 1166 1164 1167 1169
2909 56 1166 1164 1167 1170
2910 51 1152 1161 1164 1165
2911 51 1152 1161 1164 1166
2912 52 1152 1161 1164 1167
2913 53 1162 1161 1164 1165
2914 53 1162 1161 1164 1166
2915 54 1162 1161 1164 1167
2916 53 1163 1161 1164 1165
2917 53 1163 1161 1164 1166
2918 54 1163 1161 1164 1167
2919 57 1164 1167 1170 1171
2920 57 1164 1167 1170 1172
2921 57 1164 1167 1170 1173
2922 50 1168 1167 1170 1171
2923 50 1168 1167 1170 1172
2924 50 1168 1167 1170 1173
2925 50 1169 1167 1170 1171
2926 50 1169 1167 1170 1172
2927 50 1169 1167 1170 1173
2928 82 1101 1102 1103 1099
2929 83 1101 1102 1103 1104
2930 84 1105 1102 1103 1099
2931 85 1105 1102 1103 1104
2932 86 1099 1103 1104 1097
2933 87 1099 1103 1104 1135
2934 88 1102 1103 1104 1097
2935 89 1102 1103 1104 1135
2936 90 1097 1104 1135 1134
2937 91 1097 1104 1135 1136
2938 92 1103 1104 1135 1134
2939 93 1103 1104 1135 1136
2940 114 1138 1134 1135 1104
2941 1 1138 1134 1135 1136
2942 3 1135 1134 1138 1139
2943 4 1135 1134 1138 1143
2944 115 1104 1135 1136 1139
2945 116 1104 1135 1136 1146
2946 5 1134 1135 1136 1139
2947 6 1134 1135 1136 1146
2948 9 1135 1136 1139 1137
2949 10 1135 1136 1139 1138
2950 11 1146 1136 1139 1137
2951 12 1146 1136 1139 1138
2952 25 1034 1041 1042 1039
2953 26 1034 1041 1042 1040
2954 23 1037 1041 1042 1039
2955 24 1037 1041 1042 1040
2956 5 1037 1038 1039 1042
2957 6 1037 1038 1039 1044
2958 28 1098 1038 1039 1042
2959 29 1098 1038 1039 1044
2960 30 1037 1038 1098 1097
2961 31 1037 1038 1098 1099
2962 32 1039 1038 1098 1097
2963 33 1039 1038 1098 1099
2964 62 1038 1098 1099 1100
2965 63 1038 1098 1099 1103
2966 64 1097 1098 1099 1100
2967 65 1097 1098 1099 1103
2968 66 1098 1099 1100 1101
2969 67 1103 1099 1100 1101
2970 68 1098 1099 1103 1102
2971 69 1098 1099 1103 1104
2972 70 1100 1099 1103 1102
2973 71 1100 1099 1103 1104
2974 9 1038 1039 1042 1040
2975 10 1038 1039 1042 1041
2976 11 1044 1039 1042 1040
2977 12 1044 1039 1042 1041
2978 58 1104 1097 1098 1038
2979 59 1104 1097 1098 1099
2980 60 1098 1097 1104 1103
2981 61 1098 1097 1104 1135
2982 13 1035 1040 1042 1039
2983 14 1035 1040 1042 1041
2984 15 1071 1040 1042 1039
2985 16 1071 1040 1042 1041
2986 22 1035 1040 1071 1072
2987 21 1042 1040 1071 1072
2988 114 1035 1031 1032 1001
2989 1 1035 1031 1032 1033
2990 3 1032 1031 1035 1036
2991 4 1032 1031 1035 1040
2992 23 1031 1035 1036 1033
2993 24 1031 1035 1036 1034
2994 25 1040 1035 1036 1033
2995 26 1040 1035 1036 1034
2996 17 1031 1035 1040 1042
2997 19 1031 1035 1040 1071
2998 18 1036 1035 1040 1042
2999 20 1036 1035 1040 1071
3000 34 1040 1071 1072 1073
3001 34 1040 1071 1072 1074
3002 35 1040 1071 1072 1075
3003 36 1071 1072 1075 1076
3004 37 1071 1072 1075 1077
3005 37 1071 1072 1075 1084
3006 38 1073 1072 1075 1076
3007 39 1073 1072 1075 1077
3008 39 1073 1072 1075 1084
3009 38 1074 1072 1075 1076
3010 39 1074 1072 1075 1077
3011 39 1074 1072 1075 1084
3012 40 1072 1075 1077 1078
3013 40 1072 1075 1077 1079
3014 41 1072 1075 1077 1080
3015 42 1076 1075 1077 1078
3016 42 1076 1075 1077 1079
3017 43 1076 1075 1077 1080
3018 44 1084 1075 1077 1078
3019 44 1084 1075 1077 1079
3020 45 1084 1075 1077 1080
3021 40 1072 1075 1084 1085
3022 40 1072 1075 1084 1086
3023 46 1072 1075 1084 1087
3024 42 1076 1075 1084 1085
3025 42 1076 1075 1084 1086
3026 47 1076 1075 1084 1087
3027 44 1077 1075 1084 1085
3028 44 1077 1075 1084 1086
3029 48 1077 1075 1084 1087
3030 51 1075 1084 1087 1088
3031 51 1075 1084 1087 1089
3032 52 1075 1084 1087 1090
3033 53 1085 1084 1087 1088
3034 53 1085 1084 1087 1089
3035 54 1085 1084 1087 1090
3036 53 1086 1084 1087 1088
3037 53 1086 1084 1087 1089
3038 54 1086 1084 1087 1090
3039 49 1075 1077 1080 1081
3040 49 1075 1077 1080 1082
3041 49 1075 1077 1080 1083
3042 50 1078 1077 1080 1081
3043 50 1078 1077 1080 1082
3044 50 1078 1077 1080 1083
3045 50 1079 1077 1080 1081
3046 50 1079 1077 1080 1082
3047 50 1079 1077 1080 1083
3048 54 852 855 858 859
3049 54 852 855 858 860
3050 55 852 855 858 861
3051 53 856 855 858 859
3052 53 856 855 858 860
3053 56 856 855 858 861
3054 53 857 855 858 859
3055 53 857 855 858 860
3056 56 857 855 858 861
3057 49 843 845 848 849
3058 49 843 845 848 850
3059 49 843 845 848 851
3060 50 846 845 848 849
3061 50 846 845 848 850
3062 50 846 845 848 851
3063 50 847 845 848 849
3064 50 847 845 848 850
3065 50 847 845 848 851
3066 102 1109 1112 1114 1115
3067 102 1109 1112 1114 1116
3068 103 1109 1112 1114 1117
3069 104 1113 1112 1114 1115
3070 104 1113 1112 1114 1116
3071 105 1113 1112 1114 1117
3072 106 1121 1112 1114 1115
3073 106 1121 1112 1114 1116
3074 107 1121 1112 1114 1117
3075 102 1109 1112 1121 1122
3076 102 1109 1112 1121 1123
3077 108 1109 1112 1121 1124
3078 104 1113 1112 1121 1122
3079 104 1113 1112 1121 1123
3080 109 1113 1112 1121 1124
3081 106 1114 1112 1121 1122
3082 106 1114 1112 1121 1123
3083 110 1114 1112 1121 1124
3084 112 1112 1121 1124 1125
3085 112 1112 1121 1124 1126
3086 113 1112 1121 1124 1127
3087 53 1122 1121 1124 1125
3088 53 1122 1121 1124 1126
3089 54 1122 1121 1124 1127
3090 53 1123 1121 1124 1125
3091 53 1123 1121 1124 1126
3092 54 1123 1121 1124 1127
3093 54 1121 1124 1127 1128
3094 54 1121 1124 1127 1129
3095 55 1121 1124 1127 1130
3096 53 1125 1124 1127 1128
3097 53 1125 1124 1127 1129
3098 56 1125 1124 1127 1130
3099 53 1126 1124 1127 1128
3100 53 1126 1124 1127 1129
3101 56 1126 1124 1127 1130
3102 57 1124 1127 1130 1131
3103 57 1124 1127 1130 1132
3104 57 1124 1127 1130 1133
3105 50 1128 1127 1130 1131
3106 50 1128 1127 1130 1132
3107 50 1128 1127 1130 1133
3108 50 1129 1127 1130 1131
3109 50 1129 1127 1130 1132
3110 50 1129 1127 1130 1133
3111 82 998 999 1000 996
3112 83 998 999 1000 1001
3113 84 1002 999 1000 996
3114 85 1002 999 1000 1001
3115 94 1006 1004 1005 998
3116 95 1006 1004 1005 1003
3117 96 1005 1004 1006 1007
3118 96 1005 1004 1006 1008
3119 97 1005 1004 1006 1009
3120 112 1009 1018 1021 1022
3121 112 1009 1018 1021 1023
3122 113 1009 1018 1021 1024
3123 53 1019 1018 1021 1022
3124 53 1019 1018 1021 1023
3125 54 1019 1018 1021 1024
3126 53 1020 1018 1021 1022
3127 53 1020 1018 1021 1023
3128 54 1020 1018 1021 1024
3129 102 1006 1009 1011 1012
3130 102 1006 1009 1011 1013
3131 103 1006 1009 1011 1014
3132 104 1010 1009 1011 1012
3133 104 1010 1009 1011 1013
3134 105 1010 1009 1011 1014
3135 106 1018 1009 1011 1012
3136 106 1018 1009 1011 1013
3137 107 1018 1009 1011 1014
3138 102 1006 1009 1018 1019
3139 102 1006 1009 1018 1020
3140 108 1006 1009 1018 1021
3141 104 1010 1009 1018 1019
3142 104 1010 1009 1018 1020
3143 109 1010 1009 1018 1021
3144 106 1011 1009 1018 1019
3145 106 1011 1009 1018 1020
3146 110 1011 1009 1018 1021
3147 57 1021 1024 1027 1028
3148 57 1021 1024 1027 1029
3149 57 1021 1024 1027 1030
3150 50 1025 1024 1027 1028
3151 50 1025 1024 1027 1029
3152 50 1025 1024 1027 1030
3153 50 1026 1024 1027 1028
3154 50 1026 1024 1027 1029
3155 50 1026 1024 1027 1030
3156 54 1018 1021 1024 1025
3157 54 1018 1021 1024 1026
3158 55 1018 1021 1024 1027
3159 53 1022 1021 1024 1025
3160 53 1022 1021 1024 1026
3161 56 1022 1021 1024 1027
3162 53 1023 1021 1024 1025
3163 53 1023 1021 1024 1026
3164 56 1023 1021 1024 1027
3165 111 1009 1011 1014 1015
3166 111 1009 1011 1014 1016
3167 111 1009 1011 1014 1017
3168 50 1012 1011 1014 1015
3169 50 1012 1011 1014 1016
3170 50 1012 1011 1014 1017
3171 50 1013 1011 1014 1015
3172 50 1013 1011 1014 1016
3173 50 1013 1011 1014 1017
3174 98 1004 1006 1009 1010
3175 99 1004 1006 1009 1011
3176 99 1004 1006 1009 1018
3177 100 1007 1006 1009 1010
3178 101 1007 1006 1009 1011
3179 101 1007 1006 1009 1018
3180 100 1008 1006 1009 1010
3181 101 1008 1006 1009 1011
3182 101 1008 1006 1009 1018
3183 72 996 997 998 999
3184 73 996 997 998 1005
3185 74 997 998 999 1000
3186 75 997 998 999 1002
3187 76 1005 998 999 1000
3188 77 1005 998 999 1002
3189 78 997 998 1005 1003
3190 79 997 998 1005 1004
3191 80 999 998 1005 1003
3192 81 999 998 1005 1004
3193 57 984 987 990 991
3194 57 984 987 990 992
3195 57 984 987 990 993
3196 50 988 987 990 991
3197 50 988 987 990 992
3198 50 988 987 990 993
3199 50 989 987 990 991
3200 50 989 987 990 992
3201 50 989 987 990 993
3202 51 972 981 984 985
3203 51 972 981 984 986
3204 52 972 981 984 987
3205 53 982 981 984 985
3206 53 982 981 984 986
3207 54 982 981 984 987
3208 53 983 981 984 985
3209 53 983 981 984 986
3210 54 983 981 984 987
3211 54 981 984 987 988
3212 54 981 984 987 989
3213 55 981 984 987 990
3214 53 985 984 987 988
3215 53 985 984 987 989
3216 56 985 984 987 990
3217 53 986 984 987 988
3218 53 986 984 987 989
3219 56 986 984 987 990
3220 40 969 972 974 975
3221 40 969 972 974 976
3222 41 969 972 974 977
3223 42 973 972 974 975
3224 42 973 972 974 976
3225 43 973 972 974 977
3226 44 981 972 974 975
3227 44 981 972 974 976
3228 45 981 972 974 977
3229 40 969 972 981 982
3230 40 969 972 981 983
3231 46 969 972 981 984
3232 42 973 972 981 982
3233 42 973 972 981 983
3234 47 973 972 981 984
3235 44 974 972 981 982
3236 44 974 972 981 983
3237 48 974 972 981 984
3238 36 968 969 972 973
3239 37 968 969 972 974
3240 37 968 969 972 981
3241 38 970 969 972 973
3242 39 970 969 972 974
3243 39 970 969 972 981
3244 38 971 969 972 973
3245 39 971 969 972 974
3246 39 971 969 972 981
3247 49 972 974 977 978
3248 49 972 974 977 979
3249 49 972 974 977 980
3250 50 975 974 977 978
3251 50 975 974 977 979
3252 50 975 974 977 980
3253 50 976 974 977 978
3254 50 976 974 977 979
3255 50 976 974 977 980
3256 98 901 903 906 907
3257 99 901 903 906 908
3258 99 901 903 906 915
3259 100 904 903 906 907
3260 101 904 903 906 908
3261 101 904 903 906 915
3262 100 905 903 906 907
3263 101 905 903 906 908
3264 101 905 903 906 915
3265 111 906 908 911 912
3266 111 906 908 911 913
3267 111 906 908 911 914
3268 50 909 908 911 912
3269 50 909 908 911 913
3270 50 909 908 911 914
3271 50 910 908 911 912
3272 50 910 908 911 913
3273 50 910 908 911 914
3274 40 1149 1152 1154 1155
3275 40 1149 1152 1154 1156
3276 41 1149 1152 1154 1157
3277 42 1153 1152 1154 1155
3278 42 1153 1152 1154 1156
3279 43 1153 1152 1154 1157
3280 44 1161 1152 1154 1155
3281 44 1161 1152 1154 1156
3282 45 1161 1152 1154 1157
3283 40 1149 1152 1161 1162
3284 40 1149 1152 1161 1163
3285 46 1149 1152 1161 1164
3286 42 1153 1152 1161 1162
3287 42 1153 1152 1161 1163
3288 47 1153 1152 1161 1164
3289 44 1154 1152 1161 1162
3290 44 1154 1152 1161 1163
3291 48 1154 1152 1161 1164
3292 36 1148 1149 1152 1153
3293 37 1148 1149 1152 1154
3294 37 1148 1149 1152 1161
3295 38 1150 1149 1152 1153
3296 39 1150 1149 1152 1154
3297 39 1150 1149 1152 1161
3298 38 1151 1149 1152 1153
3299 39 1151 1149 1152 1154
3300 39 1151 1149 1152 1161
3301 57 1227 1230 1233 1234
3302 57 1227 1230 1233 1235
3303 57 1227 1230 1233 1236
3304 50 1231 1230 1233 1234
3305 50 1231 1230 1233 1235
3306 50 1231 1230 1233 1236
3307 50 1232 1230 1233 1234
3308 50 1232 1230 1233 1235
3309 50 1232 1230 1233 1236
3310 112 1215 1224 1227 1228
3311 112 1215 1224 1227 1229
3312 113 1215 1224 1227 1230
3313 53 1225 1224 1227 1228
3314 53 1225 1224 1227 1229
3315 54 1225 1224 1227 1230
3316 53 1226 1224 1227 1228
3317 53 1226 1224 1227 1229
3318 54 1226 1224 1227 1230
3319 54 1224 1227 1230 1231
3320 54 1224 1227 1230 1232
3321 55 1224 1227 1230 1233
3322 53 1228 1227 1230 1231
3323 53 1228 1227 1230 1232
3324 56 1228 1227 1230 1233
3325 53 1229 1227 1230 1231
3326 53 1229 1227 1230 1232
3327 56 1229 1227 1230 1233
3328 23 1134 1138 1139 1136
3329 24 1134 1138 1139 1137
3330 25 1143 1138 1139 1136
3331 26 1143 1138 1139 1137
3332 17 1134 1138 1143 1145
3333 19 1134 1138 1143 1174
3334 18 1139 1138 1143 1145
3335 20 1139 1138 1143 1174
3336 13 1144 1137 1139 1136
3337 14 1144 1137 1139 1138
3338 15 1148 1137 1139 1136
3339 16 1148 1137 1139 1138
3340 17 1139 1137 1144 1140
3341 18 1139 1137 1144 1145
3342 19 1148 1137 1144 1140
3343 20 1148 1137 1144 1145
3344 21 1139 1137 1148 1149
3345 22 1144 1137 1148 1149
3346 25 1137 1144 1145 1142
3347 26 1137 1144 1145 1143
3348 23 1140 1144 1145 1142
3349 24 1140 1144 1145 1143
3350 34 1137 1148 1149 1150
3351 34 1137 1148 1149 1151
3352 35 1137 1148 1149 1152
3353 57 1190 1193 1196 1197
3354 57 1190 1193 1196 1198
3355 57 1190 1193 1196 1199
3356 50 1194 1193 1196 1197
3357 50 1194 1193 1196 1198
3358 50 1194 1193 1196 1199
3359 50 1195 1193 1196 1197
3360 50 1195 1193 1196 1198
3361 50 1195 1193 1196 1199
3362 54 1187 1190 1193 1194
3363 54 1187 1190 1193 1195
3364 55 1187 1190 1193 1196
3365 53 1191 1190 1193 1194
3366 53 1191 1190 1193 1195
3367 56 1191 1190 1193 1196
3368 53 1192 1190 1193 1194
3369 53 1192 1190 1193 1195
3370 56 1192 1190 1193 1196
3371 54 1084 1087 1090 1091
3372 54 1084 1087 1090 1092
3373 55 1084 1087 1090 1093
3374 53 1088 1087 1090 1091
3375 53 1088 1087 1090 1092
3376 56 1088 1087 1090 1093
3377 53 1089 1087 1090 1091
3378 53 1089 1087 1090 1092
3379 56 1089 1087 1090 1093
3380 57 1087 1090 1093 1094
3381 57 1087 1090 1093 1095
3382 57 1087 1090 1093 1096
3383 50 1091 1090 1093 1094
3384 50 1091 1090 1093 1095
3385 50 1091 1090 1093 1096
3386 50 1092 1090 1093 1094
3387 50 1092 1090 1093 1095
3388 50 1092 1090 1093 1096
3389 1 1144 1140 1141 1142
3390 27 1144 1140 1141 1201
3391 4 1141 1140 1144 1137
3392 3 1141 1140 1144 1145
3393 58 1207 1200 1201 1141
3394 59 1207 1200 1201 1202
3395 60 1201 1200 1207 1206
3396 117 1201 1200 1207 1238
3397 62 1141 1201 1202 1203
3398 63 1141 1201 1202 1206
3399 64 1200 1201 1202 1203
3400 65 1200 1201 1202 1206
3401 66 1201 1202 1203 1204
3402 67 1206 1202 1203 1204
3403 68 1201 1202 1206 1205
3404 69 1201 1202 1206 1207
3405 70 1203 1202 1206 1205
3406 71 1203 1202 1206 1207
3407 86 1202 1206 1207 1200
3408 118 1202 1206 1207 1238
3409 88 1205 1206 1207 1200
3410 119 1205 1206 1207 1238
3411 82 1204 1205 1206 1202
3412 83 1204 1205 1206 1207
3413 84 1208 1205 1206 1202
3414 85 1208 1205 1206 1207
3415 72 1202 1203 1204 1205
3416 73 1202 1203 1204 1211
3417 13 1138 1143 1145 1142
3418 14 1138 1143 1145 1144
3419 15 1174 1143 1145 1142
3420 16 1174 1143 1145 1144
3421 22 1138 1143 1174 1175
3422 21 1145 1143 1174 1175
3423 34 1143 1174 1175 1176
3424 34 1143 1174 1175 1177
3425 35 1143 1174 1175 1178
3426 36 1174 1175 1178 1179
3427 37 1174 1175 1178 1180
3428 37 1174 1175 1178 1187
3429 38 1176 1175 1178 1179
3430 39 1176 1175 1178 1180
3431 39 1176 1175 1178 1187
3432 38 1177 1175 1178 1179
3433 39 1177 1175 1178 1180
3434 39 1177 1175 1178 1187
3435 40 1175 1178 1180 1181
3436 40 1175 1178 1180 1182
3437 41 1175 1178 1180 1183
3438 42 1179 1178 1180 1181
3439 42 1179 1178 1180 1182
3440 43 1179 1178 1180 1183
3441 44 1187 1178 1180 1181
3442 44 1187 1178 1180 1182
3443 45 1187 1178 1180 1183
3444 40 1175 1178 1187 1188
3445 40 1175 1178 1187 1189
3446 46 1175 1178 1187 1190
3447 42 1179 1178 1187 1188
3448 42 1179 1178 1187 1189
3449 47 1179 1178 1187 1190
3450 44 1180 1178 1187 1188
3451 44 1180 1178 1187 1189
3452 48 1180 1178 1187 1190
3453 5 1140 1141 1142 1145
3454 6 1140 1141 1142 1147
3455 28 1201 1141 1142 1145
3456 29 1201 1141 1142 1147
3457 30 1140 1141 1201 1200
3458 31 1140 1141 1201 1202
3459 32 1142 1141 1201 1200
3460 33 1142 1141 1201 1202
3461 9 1141 1142 1145 1143
3462 10 1141 1142 1145 1144
3463 11 1147 1142 1145 1143
3464 12 1147 1142 1145 1144
3465 49 1178 1180 1183 1184
3466 49 1178 1180 1183 1185
3467 49 1178 1180 1183 1186
3468 50 1181 1180 1183 1184
3469 50 1181 1180 1183 1185
3470 50 1181 1180 1183 1186
3471 50 1182 1180 1183 1184
3472 50 1182 1180 1183 1185
3473 50 1182 1180 1183 1186
3474 51 1178 1187 1190 1191
3475 51 1178 1187 1190 1192
3476 52 1178 1187 1190 1193
3477 53 1188 1187 1190 1191
3478 53 1188 1187 1190 1192
3479 54 1188 1187 1190 1193
3480 53 1189 1187 1190 1191
3481 53 1189 1187 1190 1192
3482 54 1189 1187 1190 1193
3483 94 1212 1210 1211 1204
3484 95 1212 1210 1211 1209
3485 96 1211 1210 1212 1213
3486 96 1211 1210 1212 1214
3487 97 1211 1210 1212 1215
3488 111 1215 1217 1220 1221
3489 111 1215 1217 1220 1222
3490 111 1215 1217 1220 1223
3491 50 1218 1217 1220 1221
3492 50 1218 1217 1220 1222
3493 50 1218 1217 1220 1223
3494 50 1219 1217 1220 1221
3495 50 1219 1217 1220 1222
3496 50 1219 1217 1220 1223
3497 9 517 518 521 519
3498 10 517 518 521 520
3499 11 528 518 521 519
3500 12 528 518 521 520

Impropers

1 20 179 180 181 174
2 19 174 179 181 180
3 21 180 174 181 179
4 11 115 144 113 108
5 9 11 9 12 10
6 11 12 41 10 5
7 5 6 10 5 1
8 7 9 10 12 11
9 8 4 5 6 3
10 12 41 5 10 12
11 6 10 1 5 6
12 10 5 12 10 41
13 4 7 12 11 4
14 9 5 3 6 4
15 3 15 6 4 11
16 4 1 6 5 10
17 19 483 488 490 489
18 20 488 489 490 483
19 21 489 483 490 488
20 16 481 484 485 486
21 13 480 482 481 485
22 14 482 485 481 480
23 17 484 486 485 481
24 6 416 419 423 424
25 18 486 481 485 484
26 15 485 480 481 482
27 18 280 275 279 278
28 9 423 421 424 422
29 2 423 427 416 418
30 1 418 423 416 427
31 8 422 423 424 421
32 10 417 424 422 453
33 4 419 424 423 416
34 9 417 415 418 416
35 7 415 416 418 417
36 5 424 416 423 419
37 3 427 418 416 423
38 4 413 418 417 422
39 5 418 422 417 413
40 7 421 422 424 423
41 6 422 413 417 418
42 8 416 417 418 415
43 12 453 417 422 424
44 20 385 386 387 380
45 19 380 385 387 386
46 16 378 381 382 383
47 21 386 380 387 385
48 14 379 382 378 377
49 13 377 379 378 382
50 17 381 383 382 378
51 18 383 378 382 381
52 15 382 377 378 379
53 6 313 316 320 321
54 9 320 318 321 319
55 10 314 321 319 350
56 4 316 321 320 313
57 1 315 320 313 324
58 8 319 320 321 318
59 5 315 319 314 310
60 7 318 319 321 320
61 11 321 350 319 314
62 6 319 310 314 315
63 9 314 312 315 313
64 2 320 324 313 315
65 7 312 313 315 314
66 5 321 313 320 316
67 8 313 314 315 312
68 12 350 314 319 321
69 3 324 315 313 320
70 4 310 315 314 319
71 17 278 280 279 275
72 15 279 274 275 276
73 10 211 218 216 247
74 4 213 218 217 210
75 1 212 217 210 221
76 8 216 217 218 215
77 5 212 216 211 207
78 7 215 216 218 217
79 9 217 215 218 216
80 7 209 210 212 211
81 5 218 210 217 213
82 3 221 212 210 217
83 4 207 212 211 216
84 2 217 221 210 212
85 6 210 213 217 218
86 9 211 209 212 210
87 8 210 211 212 209
88 12 247 211 216 218
89 11 218 247 216 211
90 6 216 207 211 212
91 16 172 175 176 177
92 14 173 176 172 171
93 17 175 177 176 172
94 13 171 173 172 176
95 9 114 112 115 113
96 18 177 172 176 175
97 15 176 171 172 173
98 10 108 115 113 144
99 4 110 115 114 107
100 6 107 110 114 115
101 1 109 114 107 118
102 8 113 114 115 112
103 3 118 109 107 114
104 4 104 109 108 113
105 9 108 106 109 107
106 7 106 107 109 108
107 5 115 107 114 110
108 2 114 118 107 109
109 5 109 113 108 104
110 7 112 113 115 114
111 8 107 108 109 106
112 12 144 108 113 115
113 6 113 104 108 109
114 17 72 74 73 69
115 19 71 76 78 77
116 20 76 77 78 71
117 16 69 72 73 74
118 14 70 73 69 68
119 21 77 71 78 76
120 6 4 7 11 12
121 18 74 69 73 72
122 15 73 68 69 70
123 13 68 70 69 73
124 1 6 11 4 15
125 8 10 11 12 9
126 7 3 4 6 5
127 5 12 4 11 7
128 2 11 15 4 6
129 15 588 583 584 585
130 2 526 530 519 521
131 11 424 453 422 417
132 6 519 522 526 527
133 9 526 524 527 525
134 10 520 527 525 556
135 4 522 527 526 519
136 1 521 526 519 530
137 8 525 526 527 524
138 5 521 525 520 516
139 7 524 525 527 526
140 11 527 556 525 520
141 7 518 519 521 520
142 5 527 519 526 522
143 3 530 521 519 526
144 4 516 521 520 525
145 8 519 520 521 518
146 12 556 520 525 527
147 6 525 516 520 521
148 13 274 276 275 279
149 14 276 279 275 274
150 19 277 282 284 283
151 20 282 283 284 277
152 21 283 277 284 282
153 19 1204 1209 1211 1210
154 21 1210 1204 1211 1209
155 16 275 278 279 280
156 8 622 623 624 621
157 12 659 623 628 630
158 6 628 619 623 624
159 5 624 628 623 619
160 7 627 628 630 629
161 11 630 659 628 623
162 13 583 585 584 588
163 7 621 622 624 623
164 5 630 622 629 625
165 18 589 584 588 587
166 21 592 586 593 591
167 16 584 587 588 589
168 14 585 588 584 583
169 17 587 589 588 584
170 3 633 624 622 629
171 4 619 624 623 628
172 9 623 621 624 622
173 2 629 633 622 624
174 20 591 592 593 586
175 19 586 591 593 592
176 6 731 722 726 727
177 11 733 762 731 726
178 13 686 688 687 691
179 1 624 629 622 633
180 8 628 629 630 627
181 10 623 630 628 659
182 4 625 630 629 622
183 6 622 625 629 630
184 9 629 627 630 628
185 15 691 686 687 688
186 18 692 687 691 690
187 17 690 692 691 687
188 20 694 695 696 689
189 15 794 789 790 791
190 18 795 790 794 793
191 1 727 732 725 736
192 8 731 732 733 730
193 7 724 725 727 726
194 5 733 725 732 728
195 3 736 727 725 732
196 4 722 727 726 731
197 2 732 736 725 727
198 6 725 728 732 733
199 8 725 726 727 724
200 12 762 726 731 733
201 10 726 733 731 762
202 4 728 733 732 725
203 5 727 731 726 722
204 7 730 731 733 732
205 9 732 730 733 731
206 9 726 724 727 725
207 21 695 689 696 694
208 16 687 690 691 692
209 19 689 694 696 695
210 14 688 691 687 686
211 6 834 825 829 830
212 11 836 865 834 829
213 5 830 834 829 825
214 7 833 834 836 835
215 17 793 795 794 790
216 19 792 797 799 798
217 21 798 792 799 797
218 16 790 793 794 795
219 14 791 794 790 789
220 13 789 791 790 794
221 20 797 798 799 792
222 9 829 827 830 828
223 3 839 830 828 835
224 4 825 830 829 834
225 8 828 829 830 827
226 12 865 829 834 836
227 7 827 828 830 829
228 5 836 828 835 831
229 2 835 839 828 830
230 1 830 835 828 839
231 8 834 835 836 833
232 10 829 836 834 865
233 4 831 836 835 828
234 9 835 833 836 834
235 17 896 898 897 893
236 14 894 897 893 892
237 15 897 892 893 894
238 18 898 893 897 896
239 16 893 896 897 898
240 6 937 928 932 933
241 6 828 831 835 836
242 21 901 895 902 900
243 13 892 894 893 897
244 20 900 901 902 895
245 19 1101 1106 1108 1107
246 21 1107 1101 1108 1106
247 20 1106 1107 1108 1101
248 6 1034 1037 1041 1042
249 13 1098 1100 1099 1103
250 2 1041 1045 1034 1036
251 7 1033 1034 1036 1035
252 5 1042 1034 1041 1037
253 9 1035 1033 1036 1034
254 3 1045 1036 1034 1041
255 4 1031 1036 1035 1040
256 17 999 1001 1000 996
257 14 997 1000 996 995
258 2 938 942 931 933
259 7 930 931 933 932
260 5 939 931 938 934
261 5 933 937 932 928
262 7 936 937 939 938
263 11 939 968 937 932
264 1 933 938 931 942
265 8 937 938 939 936
266 6 931 934 938 939
267 10 932 939 937 968
268 4 934 939 938 931
269 9 938 936 939 937
270 15 1000 995 996 997
271 18 1001 996 1000 999
272 3 942 933 931 938
273 4 928 933 932 937
274 9 932 930 933 931
275 8 931 932 933 930
276 12 968 932 937 939
277 16 1099 1102 1103 1104
278 14 1100 1103 1099 1098
279 17 1102 1104 1103 1099
280 6 1143 1134 1138 1139
281 9 1138 1136 1139 1137
282 10 1035 1042 1040 1071
283 4 1037 1042 1041 1034
284 1 1036 1041 1034 1045
285 8 1040 1041 1042 1039
286 15 1103 1098 1099 1100
287 18 1104 1099 1103 1102
288 9 1041 1039 1042 1040
289 5 1036 1040 1035 1031
290 7 1039 1040 1042 1041
291 6 1040 1031 1035 1036
292 8 1034 1035 1036 1033
293 12 1071 1035 1040 1042
294 11 1042 1071 1040 1035
295 16 996 999 1000 1001
296 20 1003 1004 1005 998
297 13 995 997 996 1000
298 21 1004 998 1005 1003
299 19 998 1003 1005 1004
300 19 895 900 902 901
301 8 1137 1138 1139 1136
302 12 1174 1138 1143 1145
303 3 1148 1139 1137 1144
304 4 1134 1139 1138 1143
305 7 1136 1137 1139 1138
306 5 1145 1137 1144 1140
307 1 1139 1144 1137 1148
308 8 1143 1144 1145 1142
309 2 1144 1148 1137 1139
310 6 1137 1140 1144 1145
311 17 1205 1207 1206 1202
312 15 1206 1201 1202 1203
313 18 1207 1202 1206 1205
314 14 1203 1206 1202 1201
315 16 1202 1205 1206 1207
316 13 1201 1203 1202 1206
317 5 1139 1143 1138 1134
318 7 1142 1143 1145 1144
319 11 1145 1174 1143 1138
320 9 1144 1142 1145 1143
321 10 1138 1145 1143 1174
322 4 1140 1145 1144 1137
323 20 1209 1210 1211 1204
324 9 520 518 521 519
