# Supplementary material for: Modelling the morphology and thermomechanical behaviour of low-bandgap conjugated polymers and bulk heterojunction films
Source: Royal Society of Chemistry journal article supplement (doi:10.1039/c6ee03456j), 2016-12-19
Supplement: c6ee03456j4.data [file c6ee03456j4.data]

LAMMPS data file via write_data, version 7 Dec 2015, timestep = 100000

1094 atoms
21 atom types
1153 bonds
27 bond types
2076 angles
45 angle types
3020 dihedrals
71 dihedral types
504 impropers
15 improper types

0.0000000000000000e+00 2.8000000000000000e+02 xlo xhi
0.0000000000000000e+00 2.8000000000000000e+02 ylo yhi
0.0000000000000000e+00 2.8000000000000000e+02 zlo zhi

Masses

1 32.06
2 12.011
3 12.011
4 1.008
5 14.007
6 12.011
7 12.011
8 12.011
9 12.011
10 1.008
11 12.011
12 12.011
13 1.008
14 15.999
15 12.011
16 1.008
17 12.011
18 1.008
19 12.011
20 1.008
21 1.008

Pair Coeffs # lj/cut/coul/long

1 0.25 3.55
2 0.07 3.55
3 0.07 3.55
4 0.03 2.42
5 0.17 3.25
6 0.07 3.55
7 0.07 3.55
8 0.07 3.55
9 0.07 3.55
10 0.03 2.42
11 0.07 3.55
12 0.07 3.55
13 0.03 2.42
14 0.14 2.9
15 0.066 3.5
16 0.03 2.5
17 0.066 3.5
18 0.03 2.5
19 0.066 3.5
20 0.03 2.42
21 0.03 2.42

Bond Coeffs # harmonic

1 250 1.74
2 546 1.367
3 367 1.08
4 469 1.424
5 367 1.08
6 359.23 1.47
7 483 1.323
8 483 1.354
9 469 1.449
10 469 1.486
11 469 1.394
12 469 1.434
13 460 1.403
14 367 1.08
15 469 1.431
16 469 1.4
17 469 1.4
18 367 1.08
19 450 1.364
20 320 1.41
21 340 1.09
22 268 1.529
23 340 1.09
24 268 1.529
25 268 1.529
26 340 1.09
27 367 1.08

Angle Coeffs # harmonic

1 74 97
2 70 111
3 35 125
4 35 124
5 70 107.3
6 35 125.7
7 35 127.5
8 70 125
9 70 124
10 70 120.6
11 70 119.7
12 70 115.8
13 63 124.5
14 70 124.2
15 70 119.7
16 63 116.1
17 63 122.8
18 35 120
19 35 120
20 70 119.4
21 70 119.4
22 63 121.1
23 63 120
24 63 120
25 63 120
26 35 120
27 35 120
28 63 120
29 70 120
30 75 111
31 35 109.5
32 50 109.5
33 33 107.8
34 37.5 110.7
35 37.5 110.7
36 58.35 112.7
37 33 107.8
38 37.5 110.7
39 58.35 112.7
40 58.35 112.7
41 37.5 110.7
42 37.5 110.7
43 33 107.8
44 35 120
45 35 120

Dihedral Coeffs # opls

1 0 2.8 0 0
2 0 2.8 0 0
3 0 2.8 0 0
4 0 7.25 0 0
5 0 7.25 0 0
6 0 7.25 0 0
7 0 7.25 0 0
8 0 7.25 0 0
9 0 7.25 0 0
10 0 7.25 0 0
11 0 7.25 0 0
12 0 7.25 0 0
13 0 0 0 0
14 0 0 0 0
15 0 0 0 0
16 1.16 8.074 1.795 0.417
17 0 3.05 0 0
18 0 3.05 0 0
19 0 3.05 0 0
20 0 3.05 0 0
21 0 7.25 0 0
22 0 7.25 0 0
23 0 7.25 0 0
24 0 0 0 0
25 0 0 0 0
26 0 7.25 0 0
27 0 7.25 0 0
28 0 7.25 0 0
29 0 7.25 0 0
30 0 7.25 0 0
31 0 7.25 0 0
32 0 7.25 0 0
33 0 7.25 0 0
34 0 7.25 0 0
35 0 7.25 0 0
36 0 7.25 0 0
37 0 7.25 0 0
38 0 7.25 0 0
39 0 7.25 0 0
40 0 7.25 0 0
41 0 7.25 0 0
42 0 7.25 0 0
43 0 7.25 0 0
44 0 7.25 0 0
45 0 7.25 0 0
46 0 7.25 0 0
47 0 7.25 0 0
48 0 7.25 0 0
49 0 7.25 0 0
50 0 3 0 0
51 0 7.25 0 0
52 0 7.25 0 0
53 0 0 0.76 0
54 0 0 0.76 0
55 0 0 0.468 0
56 1.3 -0.05 0.2 0
57 0 0 0.3 0
58 0 0 0.3 0
59 0 0 0.3 0
60 1.3 -0.05 0.2 0
61 0 0 0.3 0
62 0 0 0.3 0
63 1.3 -0.05 0.2 0
64 1.3 -0.05 0.2 0
65 0 0 0.3 0
66 0 0 0.3 0
67 0 0 0.3 0
68 0 7.25 0 0
69 0 7.25 0 0
70 0 7.25 0 0
71 0 7.25 0 0

Improper Coeffs # cvff

1 0.8335 -1 2
2 0.8335 -1 2
3 0.8335 -1 2
4 0.8335 -1 2
5 0.8335 -1 2
6 0.8335 -1 2
7 0.8335 -1 2
8 0.8335 -1 2
9 0.8335 -1 2
10 0.8335 -1 2
11 0.8335 -1 2
12 0.8335 -1 2
13 0.8335 -1 2
14 0.8335 -1 2
15 0.8335 -1 2

Atoms # full

979 1 16 2.9999999999999999e-02 3.3876598668974573e+01 5.9687902596203571e+01 3.6370750079980767e+00 0 0 0
980 1 17 -1.2000000000000000e-01 3.2547787239781698e+01 5.8982576379086979e+01 5.2808166348061274e+00 0 0 0
981 1 18 5.9999999999999998e-02 3.1771234807790826e+01 5.9745232999400372e+01 5.2223219112472856e+00 0 0 0
973 1 13 1.1500000000000000e-01 3.6856481857297588e+01 5.9078431819410660e+01 3.2066291260364426e+00 0 0 0
977 1 15 1.4000000000000001e-01 3.3886369904384530e+01 5.9588456947435638e+01 4.7224851357283519e+00 0 0 0
978 1 16 2.9999999999999999e-02 3.3810412003607304e+01 6.0632180490149651e+01 5.0273980357357466e+00 0 0 0
1019 1 10 1.4499999999999999e-01 3.7776867406276132e+01 6.6054267700473574e+01 4.7971106953654505e+00 0 0 0
1012 1 8 -1.6700000000000001e-01 3.7546653198240620e+01 6.7108861059120414e+01 4.8322428219237095e+00 0 0 0
1018 1 9 2.2900000000000001e-01 3.6671407659587480e+01 6.9596452079128667e+01 5.2743023400248221e+00 0 0 0
1016 1 7 -7.2999999999999995e-02 3.6949586103426441e+01 6.9185227791455475e+01 3.9403212949645749e+00 0 0 0
1017 1 8 -1.6700000000000001e-01 3.7248550163297281e+01 6.7852482675377573e+01 3.7681608819155223e+00 0 0 0
1094 1 21 -0.0000000000000000e+00 3.6676707031645130e+01 6.9929163567910550e+01 3.2064980378420254e+00 0 0 0
1020 1 10 1.4499999999999999e-01 3.7425262842019109e+01 6.7569038508401590e+01 2.7411107208297838e+00 0 0 0
1008 1 4 1.7399999999999999e-01 3.9916021338041084e+01 6.7989283982257803e+01 7.4345240842223097e+00 0 0 0
1005 1 3 -2.2400000000000000e-01 3.9469582402700034e+01 6.7060146107310885e+01 7.7566965323780863e+00 0 0 0
1011 1 7 -7.2999999999999995e-02 3.7763409352755929e+01 6.7580578389343742e+01 6.0561918580291199e+00 0 0 0
1006 1 2 1.0800000000000000e-01 3.8403330238214210e+01 6.6746366595386860e+01 7.1593975482203520e+00 0 0 0
1009 1 5 -2.9999999999999999e-01 3.7466792863949621e+01 6.9335152728045287e+01 7.4504531855702485e+00 0 0 0
1013 1 9 2.2900000000000001e-01 3.7396221853958870e+01 6.8892753639785155e+01 6.2887063725652608e+00 0 0 0
1014 1 5 -2.9999999999999999e-01 3.6211138220712655e+01 7.0882843676701555e+01 5.5415385373360335e+00 0 0 0
1062 1 11 -1.1500000000000000e-01 3.4710322534219380e+01 7.2937274210748271e+01 7.8397438876914816e+00 0 0 0
1066 1 13 1.1500000000000000e-01 3.4156122983732210e+01 7.2050862270732537e+01 8.1109204553321472e+00 0 0 0
1061 1 11 -1.1500000000000000e-01 3.4080538790115739e+01 7.4163950359160097e+01 7.8320561353702205e+00 0 0 0
1010 1 6 1.3100000000000001e-01 3.7078354319888746e+01 7.0551646358106154e+01 7.8356405896943881e+00 0 0 0
1015 1 6 1.3100000000000001e-01 3.6464644163207431e+01 7.1454503710743666e+01 6.7467797066071515e+00 0 0 0
1059 1 12 2.3499999999999999e-01 3.5617634049313509e+01 7.5081022745060181e+01 6.2484518672019389e+00 0 0 0
1030 1 13 1.1500000000000000e-01 3.7499797787620572e+01 7.3097876971135335e+01 8.9294880073950740e+00 0 0 0
1057 1 11 -1.1500000000000000e-01 3.5858306073934152e+01 7.2811460582986825e+01 6.9541074395292766e+00 0 0 0
1058 1 11 -1.1500000000000000e-01 3.6425908115393426e+01 7.3877817731045354e+01 6.2738162103891266e+00 0 0 0
1063 1 13 1.1500000000000000e-01 3.7323406994701493e+01 7.3721586776562589e+01 5.6937406545326850e+00 0 0 0
1067 1 14 -2.8499999999999998e-01 3.5859772478422293e+01 7.6266879184801297e+01 5.5831502814725065e+00 0 0 0
1065 1 13 1.1500000000000000e-01 3.3165795432711064e+01 7.4235032044785655e+01 8.4017858818752345e+00 0 0 0
1070 1 16 2.9999999999999999e-02 3.7921361033780762e+01 7.6251811668482063e+01 6.3327019955224921e+00 0 0 0
1069 1 16 2.9999999999999999e-02 3.6569838877232094e+01 7.7135243801734802e+01 7.1625466352799823e+00 0 0 0
1074 1 17 -1.2000000000000000e-01 3.7736573530565757e+01 7.7717920013686538e+01 3.8739952065332273e+00 0 0 0
1071 1 17 -1.2000000000000000e-01 3.7493409546981198e+01 7.7997581827866185e+01 5.3133573542531369e+00 0 0 0
1068 1 15 1.4000000000000001e-01 3.6978193302595372e+01 7.6785249420781412e+01 6.2144685020705710e+00 0 0 0
1075 1 18 5.9999999999999998e-02 3.8126859355029147e+01 7.6792818232815847e+01 3.4497737746680657e+00 0 0 0
1073 1 18 5.9999999999999998e-02 3.8209222176097107e+01 7.8696505077672583e+01 5.7460449717221511e+00 0 0 0
1060 1 11 -1.1500000000000000e-01 3.4518830162136616e+01 7.5236844711081687e+01 7.0633765010544360e+00 0 0 0
1064 1 13 1.1500000000000000e-01 3.3858408705639938e+01 7.6087206916657365e+01 6.9789512730283958e+00 0 0 0
1077 1 17 -1.2000000000000000e-01 3.8329379773375848e+01 7.8995173572854227e+01 3.1492206281752795e+00 0 0 0
1076 1 18 5.9999999999999998e-02 3.6716061313092055e+01 7.7905282835444581e+01 3.5400035297091001e+00 0 0 0
1078 1 18 5.9999999999999998e-02 3.7980938018123872e+01 7.9961147572633351e+01 3.5147101295762777e+00 0 0 0
1087 1 18 5.9999999999999998e-02 4.1754772233342990e+01 7.8654978297820776e+01 1.3483036561682902e+00 0 0 0
1072 1 18 5.9999999999999998e-02 3.6600606419167086e+01 7.8622646573230725e+01 5.3305818015658835e+00 0 0 0
1086 1 17 -1.2000000000000000e-01 4.1087111679471178e+01 7.9516077179143736e+01 1.3193560304257244e+00 0 0 0
1083 1 17 -1.2000000000000000e-01 4.0705090912471967e+01 7.9954911885528702e+01 2.7491280703717011e+00 0 0 0
1080 1 17 -1.2000000000000000e-01 3.9853818494232158e+01 7.8937434812573414e+01 3.4885943965984270e+00 0 0 0
1085 1 18 5.9999999999999998e-02 4.0096696296018813e+01 8.0855889535163939e+01 2.8278381646915149e+00 0 0 0
1079 1 18 5.9999999999999998e-02 3.8212436555746571e+01 7.9083721095993354e+01 2.0691356232165434e+00 0 0 0
1082 1 18 5.9999999999999998e-02 4.0019075294736609e+01 7.9148032505980453e+01 4.5452111088412304e+00 0 0 0
1081 1 18 5.9999999999999998e-02 4.0383098951958630e+01 7.8021335870899748e+01 3.2264397183072195e+00 0 0 0
1084 1 18 5.9999999999999998e-02 4.1545615985793653e+01 8.0375356332727918e+01 3.3012568447148340e+00 0 0 0
1088 1 18 5.9999999999999998e-02 4.1598174299531749e+01 8.0396604933627728e+01 9.3001559825870317e-01 0 0 0
987 1 18 5.9999999999999998e-02 3.0788301264246616e+01 5.7446055225706033e+01 6.6452187697746448e+00 0 0 0
986 1 17 -1.2000000000000000e-01 3.1720263831017451e+01 5.7314215079973437e+01 7.1949131918529838e+00 0 0 0
991 1 18 5.9999999999999998e-02 3.1391631134354316e+01 5.5190563257175015e+01 6.9326032607897270e+00 0 0 0
988 1 18 5.9999999999999998e-02 3.1564552800755820e+01 5.7132790649527948e+01 8.2583701612392044e+00 0 0 0
989 1 17 -1.2000000000000000e-01 3.2191199398275565e+01 5.5828320905409136e+01 6.5556995762249866e+00 0 0 0
1000 1 18 5.9999999999999998e-02 3.3669726277291659e+01 5.4144053780549228e+01 9.9325054090288134e+00 0 0 0
993 1 18 5.9999999999999998e-02 3.3650411551798179e+01 5.6142956639773921e+01 7.8395907886180671e+00 0 0 0
998 1 19 -1.7999999999999999e-01 3.2842418167304245e+01 5.3974924537815014e+01 9.2432619098981057e+00 0 0 0
995 1 17 -1.2000000000000000e-01 3.3316784352735141e+01 5.3974525486326137e+01 7.7339633094321467e+00 0 0 0
992 1 17 -1.2000000000000000e-01 3.3592964337234761e+01 5.5361059749436080e+01 7.0823344211163102e+00 0 0 0
990 1 18 5.9999999999999998e-02 3.2172705767917599e+01 5.5709496581903494e+01 5.4723533155997641e+00 0 0 0
994 1 18 5.9999999999999998e-02 3.4303008093395178e+01 5.5083004295105724e+01 6.3034727361977039e+00 0 0 0
999 1 18 5.9999999999999998e-02 3.2376494186976885e+01 5.3013833820197981e+01 9.4607996451828509e+00 0 0 0
996 1 18 5.9999999999999998e-02 3.4238053225946317e+01 5.3424443909920882e+01 7.5421976861365438e+00 0 0 0
997 1 18 5.9999999999999998e-02 3.2599913114940982e+01 5.3400237143430360e+01 7.1471169152661052e+00 0 0 0
1001 1 18 5.9999999999999998e-02 3.2422369412976394e+01 5.4966966622524922e+01 9.4091290580992535e+00 0 0 0
982 1 18 5.9999999999999998e-02 3.2436621904507156e+01 5.8199023230283082e+01 4.5312922566948686e+00 0 0 0
940 1 14 -2.8499999999999998e-01 3.8668964026426814e+01 5.5277915035688061e+01 8.4220882299648459e+00 0 0 0
943 1 16 2.9999999999999999e-02 3.8418426114437217e+01 5.5361587103813676e+01 6.3833984145953471e+00 0 0 0
945 1 18 5.9999999999999998e-02 3.8995018813571562e+01 5.2985457178179374e+01 6.8526565102924915e+00 0 0 0
942 1 16 2.9999999999999999e-02 4.0028636804707020e+01 5.5860596868928340e+01 6.8550414911527273e+00 0 0 0
941 1 15 1.4000000000000001e-01 3.9192229131739893e+01 5.5221579707851099e+01 7.1382009364815353e+00 0 0 0
952 1 18 5.9999999999999998e-02 4.2362538137493438e+01 5.3957589082916833e+01 7.2775744713108743e+00 0 0 0
944 1 17 -1.2000000000000000e-01 3.9700568384666163e+01 5.3814231098175000e+01 6.9112579306751680e+00 0 0 0
946 1 18 5.9999999999999998e-02 4.0288083879543848e+01 5.3724602349411498e+01 5.9975334266176672e+00 0 0 0
947 1 17 -1.2000000000000000e-01 4.0551498200170940e+01 5.3117529615197036e+01 8.1439950142394917e+00 0 0 0
950 1 17 -1.2000000000000000e-01 4.1875371416482317e+01 5.3835895730099089e+01 8.2450250094630544e+00 0 0 0
948 1 18 5.9999999999999998e-02 4.0090917045997230e+01 5.3131888479900219e+01 9.1318010500682387e+00 0 0 0
949 1 18 5.9999999999999998e-02 4.0866483422055872e+01 5.2095430529001668e+01 7.9337622719572485e+00 0 0 0
958 1 18 5.9999999999999998e-02 4.1404387121861390e+01 5.2056217609148206e+01 1.0593128935587131e+01 0 0 0
960 1 18 5.9999999999999998e-02 4.3819357961600360e+01 5.0997266855484277e+01 1.0796379100690601e+01 0 0 0
951 1 18 5.9999999999999998e-02 4.1938037564815914e+01 5.4737588474694952e+01 8.8542241131224415e+00 0 0 0
953 1 17 -1.2000000000000000e-01 4.2725641571444555e+01 5.2830613969769232e+01 9.0601922845647174e+00 0 0 0
954 1 18 5.9999999999999998e-02 4.3697649893122772e+01 5.3280242874228328e+01 8.8573779095002472e+00 0 0 0
983 1 17 -1.2000000000000000e-01 3.2694891103101185e+01 5.8478239037586064e+01 6.7455326248643974e+00 0 0 0
985 1 18 5.9999999999999998e-02 3.2846096085449339e+01 5.9304251648996896e+01 7.4404716614510464e+00 0 0 0
976 1 14 -2.8499999999999998e-01 3.5093942085996545e+01 5.8777523876154739e+01 4.8782851127706470e+00 0 0 0
968 1 12 2.3499999999999999e-01 3.6074892081018945e+01 5.9555980484398731e+01 5.1832770996156849e+00 0 0 0
969 1 11 -1.1500000000000000e-01 3.7105861909862320e+01 5.9456598191066298e+01 4.1870370945534381e+00 0 0 0
967 1 11 -1.1500000000000000e-01 3.6280879704772047e+01 5.9997972424664120e+01 6.4745648477645679e+00 0 0 0
984 1 18 5.9999999999999998e-02 3.3629663966863021e+01 5.7939267217714814e+01 6.8998322870051050e+00 0 0 0
882 1 13 1.1500000000000000e-01 3.3106494584068969e+01 5.9096413801983964e+01 9.7621410757570573e+00 0 0 0
879 1 11 -1.1500000000000000e-01 3.2805245519795307e+01 5.7988464945852712e+01 1.1525979223059121e+01 0 0 0
878 1 11 -1.1500000000000000e-01 3.3161587393428817e+01 5.9176829088806393e+01 1.0837733082050384e+01 0 0 0
883 1 13 1.1500000000000000e-01 3.2438728738996154e+01 5.7145964403264557e+01 1.0958301246446245e+01 0 0 0
880 1 11 -1.1500000000000000e-01 3.3158235614677785e+01 5.7972665339051197e+01 1.2983949654894287e+01 0 0 0
931 1 11 -1.1500000000000000e-01 3.8313727409688816e+01 5.7710229720408421e+01 8.8046800117817590e+00 0 0 0
932 1 12 2.3499999999999999e-01 3.7869487899629547e+01 5.6376918204372004e+01 8.6784188578680013e+00 0 0 0
877 1 12 2.3499999999999999e-01 3.3488560842612429e+01 6.0291428631993838e+01 1.1571753854378173e+01 0 0 0
876 1 11 -1.1500000000000000e-01 3.4003828635860884e+01 6.0297604467464623e+01 1.2902662986522710e+01 0 0 0
972 1 13 1.1500000000000000e-01 3.5518810509443959e+01 5.9924976083909492e+01 7.2363535821052887e+00 0 0 0
966 1 11 -1.1500000000000000e-01 3.7522392927000730e+01 6.0572667729039374e+01 6.8138173582841803e+00 0 0 0
923 1 5 -2.9999999999999999e-01 3.8318760336339786e+01 6.2292802542581562e+01 8.4397285976745362e+00 0 0 0
924 1 6 1.3100000000000001e-01 3.7957508212618116e+01 6.1054995792983469e+01 8.1814643158609144e+00 0 0 0
919 1 6 1.3100000000000001e-01 3.7959000465970277e+01 6.0162215033010717e+01 9.3122640949369355e+00 0 0 0
935 1 11 -1.1500000000000000e-01 3.6231778812419158e+01 5.8425528931155462e+01 9.8432570114986380e+00 0 0 0
930 1 11 -1.1500000000000000e-01 3.7555925409393218e+01 5.8741242318075891e+01 9.3410977940561128e+00 0 0 0
918 1 5 -2.9999999999999999e-01 3.8598291488385186e+01 6.0477699519028150e+01 1.0445164333516153e+01 0 0 0
971 1 11 -1.1500000000000000e-01 3.8497876271519182e+01 6.0721214580630004e+01 5.7878222626470439e+00 0 0 0
970 1 11 -1.1500000000000000e-01 3.8290189696732597e+01 6.0125732346169237e+01 4.5052166378637404e+00 0 0 0
974 1 13 1.1500000000000000e-01 3.9121416145555962e+01 6.0319330435583737e+01 3.8434142726884963e+00 0 0 0
936 1 13 1.1500000000000000e-01 3.9262359831845245e+01 5.7811612634401428e+01 8.2985001698442211e+00 0 0 0
975 1 13 1.1500000000000000e-01 3.9403848959798708e+01 6.1294583036068538e+01 5.9176764208384878e+00 0 0 0
896 1 18 5.9999999999999998e-02 3.4644281701833386e+01 6.5848523885055798e+01 8.3203255395429405e+00 0 0 0
892 1 17 -1.2000000000000000e-01 3.4121343741446445e+01 6.4254480703855691e+01 9.6118194525685698e+00 0 0 0
893 1 18 5.9999999999999998e-02 3.3303225132845640e+01 6.3813822947329371e+01 9.0420796466901052e+00 0 0 0
897 1 18 5.9999999999999998e-02 3.5183511482257856e+01 6.6170025250967626e+01 9.8904567543579596e+00 0 0 0
895 1 17 -1.2000000000000000e-01 3.4334350380131049e+01 6.5739604887324219e+01 9.3596422503928789e+00 0 0 0
894 1 18 5.9999999999999998e-02 3.4049390951369304e+01 6.4322239539914662e+01 1.0697329273920426e+01 0 0 0
898 1 17 -1.2000000000000000e-01 3.2919232809096897e+01 6.6479789499006614e+01 9.1648240912746815e+00 0 0 0
900 1 18 5.9999999999999998e-02 3.2190475395098467e+01 6.5810120306459837e+01 8.7081447819312547e+00 0 0 0
1002 1 1 -1.1600000000000001e-01 3.7694584940859713e+01 6.5258233176548401e+01 7.7315382694687500e+00 0 0 0
891 1 18 5.9999999999999998e-02 3.5830731539412625e+01 6.3075882205335219e+01 8.6707836458226399e+00 0 0 0
889 1 17 -1.2000000000000000e-01 3.5248593744349904e+01 6.3131156798245399e+01 9.5906535509361781e+00 0 0 0
890 1 18 5.9999999999999998e-02 3.5989197679012285e+01 6.3204819475867289e+01 1.0387007508190420e+01 0 0 0
886 1 15 1.4000000000000001e-01 3.4660951838526188e+01 6.1701476003510187e+01 9.7962954374011968e+00 0 0 0
887 1 16 2.9999999999999999e-02 3.5469119113526801e+01 6.0971447143371968e+01 9.8412903773223057e+00 0 0 0
888 1 16 2.9999999999999999e-02 3.4098687165635333e+01 6.1221602380171625e+01 8.9952462820825616e+00 0 0 0
885 1 14 -2.8499999999999998e-01 3.3878420297729733e+01 6.1498428101322851e+01 1.1048506807975137e+01 0 0 0
920 1 7 -7.2999999999999995e-02 3.9341404920247861e+01 6.2189924712889443e+01 1.2046161658693322e+01 0 0 0
922 1 9 2.2900000000000001e-01 3.8914573442207370e+01 6.1872814616240149e+01 1.0714128204661929e+01 0 0 0
899 1 18 5.9999999999999998e-02 3.2334662679989762e+01 6.6695972912842933e+01 1.0059051335480834e+01 0 0 0
1037 1 18 5.9999999999999998e-02 4.0943554400115559e+01 7.0121141660691990e+01 1.4295630083409643e+01 0 0 0
1004 1 3 -2.2400000000000000e-01 3.9779431041897929e+01 6.6281779018579670e+01 8.8723338485121914e+00 0 0 0
1007 1 4 1.7399999999999999e-01 4.0675085158982839e+01 6.6450190946243026e+01 9.4518518595951786e+00 0 0 0
925 1 7 -7.2999999999999995e-02 3.9064374720640878e+01 6.4169235983585978e+01 9.9538796519963473e+00 0 0 0
927 1 9 2.2900000000000001e-01 3.8744992109813950e+01 6.2832165000037286e+01 9.6250432496935403e+00 0 0 0
1003 1 2 1.0800000000000000e-01 3.9008429456106420e+01 6.5210825955645021e+01 8.9332142413891980e+00 0 0 0
929 1 10 1.4499999999999999e-01 3.9371009761280789e+01 6.5609274702444182e+01 1.1626109453372095e+01 0 0 0
926 1 8 -1.6700000000000001e-01 3.9345428678975544e+01 6.4575695769713249e+01 1.1313923294097066e+01 0 0 0
928 1 10 1.4499999999999999e-01 3.9527832386324462e+01 6.4045185595680806e+01 1.3312631726707059e+01 0 0 0
921 1 8 -1.6700000000000001e-01 3.9354981592920197e+01 6.3600758840032057e+01 1.2343607752760567e+01 0 0 0
905 1 18 5.9999999999999998e-02 3.3340909746077891e+01 6.9847343831613671e+01 8.8048564254439210e+00 0 0 0
903 1 18 5.9999999999999998e-02 3.3070176509758113e+01 6.7439323203737956e+01 7.5978556894661331e+00 0 0 0
901 1 17 -1.2000000000000000e-01 3.2799263436000338e+01 6.7766732864324112e+01 8.6016031775346402e+00 0 0 0
908 1 18 5.9999999999999998e-02 3.4011961215534662e+01 6.8174727590473395e+01 1.1320003424174478e+01 0 0 0
904 1 17 -1.2000000000000000e-01 3.3594628665995025e+01 6.8873212624669790e+01 9.2229414673008669e+00 0 0 0
907 1 19 -1.7999999999999999e-01 3.3493369178923615e+01 6.8963058960388437e+01 1.0774388228371034e+01 0 0 0
909 1 18 5.9999999999999998e-02 3.3881043771015143e+01 6.9918631059260349e+01 1.1127503872945061e+01 0 0 0
910 1 18 5.9999999999999998e-02 3.2546676801393183e+01 6.8613237279061536e+01 1.1186089983057448e+01 0 0 0
902 1 18 5.9999999999999998e-02 3.1745994771752141e+01 6.8013511666154812e+01 8.4680915910932431e+00 0 0 0
906 1 18 5.9999999999999998e-02 3.4631309395684418e+01 6.8691751506813290e+01 8.9392779735889434e+00 0 0 0
1033 1 16 2.9999999999999999e-02 3.8718193676753678e+01 6.9030543805839258e+01 1.4512873370103614e+01 0 0 0
1036 1 18 5.9999999999999998e-02 4.0964699992294406e+01 6.9945858566613168e+01 1.2575695664808526e+01 0 0 0
1035 1 17 -1.2000000000000000e-01 4.0579163727604680e+01 6.9488002396516180e+01 1.3486645882274244e+01 0 0 0
1038 1 17 -1.2000000000000000e-01 4.0913316656552951e+01 6.7949891811539587e+01 1.3754196533962155e+01 0 0 0
1039 1 18 5.9999999999999998e-02 4.0371244489774305e+01 6.7889374668427308e+01 1.4697910172715755e+01 0 0 0
1032 1 15 1.4000000000000001e-01 3.9078547191539187e+01 6.9696394678549652e+01 1.3728725422008942e+01 0 0 0
1021 1 11 -1.1500000000000000e-01 3.7530462613673450e+01 7.1011039390513957e+01 9.2503220457652358e+00 0 0 0
1027 1 13 1.1500000000000000e-01 3.7375825079212071e+01 6.9014062192469623e+01 1.0198320688897958e+01 0 0 0
1022 1 11 -1.1500000000000000e-01 3.7570219732303116e+01 7.0070688971536114e+01 1.0308550306556894e+01 0 0 0
1034 1 16 2.9999999999999999e-02 3.9088045939690673e+01 7.0680103258889631e+01 1.4198115746185783e+01 0 0 0
1023 1 12 2.3499999999999999e-01 3.8139607407403425e+01 7.0387108142007349e+01 1.1582664837500074e+01 0 0 0
1026 1 11 -1.1500000000000000e-01 3.7794447425910704e+01 7.2309001668479070e+01 9.6056960726490175e+00 0 0 0
1031 1 14 -2.8499999999999998e-01 3.8402769466840347e+01 6.9408238011575307e+01 1.2512208079030666e+01 0 0 0
1024 1 11 -1.1500000000000000e-01 3.8339733138658922e+01 7.1807401633481973e+01 1.1858973962196822e+01 0 0 0
1025 1 11 -1.1500000000000000e-01 3.8105996653983894e+01 7.2785969109155133e+01 1.0924810533194995e+01 0 0 0
1029 1 13 1.1500000000000000e-01 3.8347490673110379e+01 7.3813096098033583e+01 1.1155224915219357e+01 0 0 0
1028 1 13 1.1500000000000000e-01 3.8582295322587157e+01 7.2193205878053931e+01 1.2838115765919971e+01 0 0 0
35 1 18 5.9999999999999998e-02 1.7987262168535967e+01 3.2935239431001598e+01 8.2547365668001504e+01 0 0 0
1091 1 18 5.9999999999999998e-02 3.9281131015370704e+01 7.8311480091785697e+01 5.3636741234065377e-01 0 0 0
31 1 15 1.4000000000000001e-01 1.8662995811780164e+01 3.4512579027471510e+01 8.1299782525861531e+01 0 0 0
33 1 16 2.9999999999999999e-02 1.9646592203920608e+01 3.4717988098631452e+01 8.1722213801306154e+01 0 0 0
763 1 18 5.9999999999999998e-02 2.3934249497227238e+01 5.0802656196663406e+01 2.0434989402503213e+01 0 0 0
761 1 16 2.9999999999999999e-02 2.5630731028055468e+01 5.3015211297376702e+01 1.9776134562205751e+01 0 0 0
870 1 18 5.9999999999999998e-02 3.1826428808695681e+01 4.9293075891670050e+01 1.9950385312269198e+01 0 0 0
868 1 17 -1.2000000000000000e-01 3.2857738559905279e+01 4.9575927655363152e+01 1.9739446374517176e+01 0 0 0
869 1 18 5.9999999999999998e-02 3.3088871192000589e+01 5.0277890222017987e+01 2.0540649436448327e+01 0 0 0
854 1 18 5.9999999999999998e-02 2.8895896878525591e+01 5.3190621683159087e+01 1.6689883176940516e+01 0 0 0
853 1 17 -1.2000000000000000e-01 2.9693523430313547e+01 5.2793654895783675e+01 1.6061942652391586e+01 0 0 0
856 1 17 -1.2000000000000000e-01 3.0307606643184688e+01 5.1391082108199349e+01 1.6326504910937107e+01 0 0 0
855 1 18 5.9999999999999998e-02 2.9288715698671048e+01 5.2525089760055998e+01 1.5086182914325848e+01 0 0 0
789 1 11 -1.1500000000000000e-01 2.9599847910236996e+01 5.7856464960046701e+01 1.9844171625673546e+01 0 0 0
846 1 13 1.1500000000000000e-01 2.8535058831733082e+01 5.6972831286877131e+01 1.5654337062025720e+01 0 0 0
849 1 14 -2.8499999999999998e-01 2.9927029805705054e+01 5.5202945973066107e+01 1.5755869601906198e+01 0 0 0
850 1 15 1.4000000000000001e-01 3.0602231691900784e+01 5.4028408301359335e+01 1.6005378456472613e+01 0 0 0
851 1 16 2.9999999999999999e-02 3.1315219996088988e+01 5.4241220985580718e+01 1.6801907439552245e+01 0 0 0
793 1 13 1.1500000000000000e-01 2.9921213590064699e+01 5.6948515743421673e+01 1.9355548744650886e+01 0 0 0
860 1 18 5.9999999999999998e-02 3.0268432464929091e+01 5.0035423352073110e+01 1.8016367400368413e+01 0 0 0
937 1 13 1.1500000000000000e-01 3.6355218704140100e+01 5.4995409799576841e+01 9.3279753625099264e+00 0 0 0
857 1 18 5.9999999999999998e-02 2.9597157690343405e+01 5.0746518967294165e+01 1.5808913539089867e+01 0 0 0
852 1 16 2.9999999999999999e-02 3.1252086404002242e+01 5.3833373068179277e+01 1.5152295826492365e+01 0 0 0
866 1 18 5.9999999999999998e-02 3.3027094227335333e+01 4.9924637851419696e+01 1.7540163690977096e+01 0 0 0
957 1 18 5.9999999999999998e-02 4.2127035943637921e+01 5.3434411333757431e+01 1.1192082802695374e+01 0 0 0
955 1 18 5.9999999999999998e-02 4.2609499709302924e+01 5.1863613178583265e+01 8.5707839289083481e+00 0 0 0
959 1 17 -1.2000000000000000e-01 4.3433648379116903e+01 5.1843422354693502e+01 1.1365017682372715e+01 0 0 0
956 1 17 -1.2000000000000000e-01 4.2362609990130352e+01 5.2574952497785979e+01 1.0564440082935448e+01 0 0 0
961 1 18 5.9999999999999998e-02 4.4335826203155086e+01 5.2441595814314297e+01 1.1492948342010624e+01 0 0 0
964 1 18 5.9999999999999998e-02 4.2401030166982899e+01 5.2019326033631685e+01 1.3503478978954661e+01 0 0 0
962 1 19 -1.7999999999999999e-01 4.2872780571224737e+01 5.1339474971877586e+01 1.2794004460028614e+01 0 0 0
963 1 18 5.9999999999999998e-02 4.1940207863019630e+01 5.0915410184484948e+01 1.2421744783208027e+01 0 0 0
792 1 13 1.1500000000000000e-01 2.9219094936914942e+01 5.9291993496890136e+01 1.8191409318819673e+01 0 0 0
791 1 13 1.1500000000000000e-01 2.9039102806320411e+01 6.1172022504270643e+01 1.9457553784107070e+01 0 0 0
788 1 11 -1.1500000000000000e-01 2.9444113260430022e+01 5.9057660523361903e+01 1.9221387382469516e+01 0 0 0
787 1 11 -1.1500000000000000e-01 2.9305196098942119e+01 6.0259726472525038e+01 1.9970691494749115e+01 0 0 0
847 1 13 1.1500000000000000e-01 2.9270099714690055e+01 5.9720629765591305e+01 1.5433798757937327e+01 0 0 0
843 1 11 -1.1500000000000000e-01 2.9869896878809293e+01 5.8831754752800407e+01 1.5562424469016021e+01 0 0 0
844 1 11 -1.1500000000000000e-01 3.1235215190285974e+01 5.9090959838383206e+01 1.5736873571725646e+01 0 0 0
848 1 13 1.1500000000000000e-01 3.1540655501613820e+01 6.0095690817477710e+01 1.5484639799475060e+01 0 0 0
842 1 11 -1.1500000000000000e-01 2.9509850858697284e+01 5.7437545753871021e+01 1.5639472058372800e+01 0 0 0
841 1 12 2.3499999999999999e-01 3.0485602968469010e+01 5.6492884732901672e+01 1.5934794497908374e+01 0 0 0
828 1 6 1.3100000000000001e-01 3.3557836464588533e+01 5.8493275926901951e+01 1.6072699953424813e+01 0 0 0
839 1 11 -1.1500000000000000e-01 3.2139831684201980e+01 5.8109845712670776e+01 1.6115103604873905e+01 0 0 0
840 1 11 -1.1500000000000000e-01 3.1860131009819629e+01 5.6708571740975586e+01 1.6181962083002279e+01 0 0 0
845 1 13 1.1500000000000000e-01 3.2628798105969196e+01 5.6038544004844425e+01 1.6537790311382114e+01 0 0 0
797 1 16 2.9999999999999999e-02 2.8790991843851724e+01 6.2814532497825745e+01 2.0995725526387528e+01 0 0 0
800 1 18 5.9999999999999998e-02 2.9885716109093433e+01 6.4193854924512820e+01 2.2717042105565096e+01 0 0 0
795 1 15 1.4000000000000001e-01 2.9618819025524328e+01 6.2550483703290944e+01 2.1653814475924865e+01 0 0 0
786 1 12 2.3499999999999999e-01 2.9312524174360775e+01 6.0157367776683820e+01 2.1419786202218145e+01 0 0 0
794 1 14 -2.8499999999999998e-01 2.9369971028797547e+01 6.1257392103385001e+01 2.2275520988970786e+01 0 0 0
808 1 18 5.9999999999999998e-02 2.5373892753459490e+01 6.4512287001170776e+01 2.3109011183752671e+01 0 0 0
799 1 18 5.9999999999999998e-02 2.9528401951081186e+01 6.2903833836835190e+01 2.3835951534182300e+01 0 0 0
798 1 17 -1.2000000000000000e-01 2.9221508237474929e+01 6.3346778035386563e+01 2.2888472253983284e+01 0 0 0
827 1 5 -2.9999999999999999e-01 3.4319379628390848e+01 5.8223070503038123e+01 1.7237780982744958e+01 0 0 0
796 1 16 2.9999999999999999e-02 3.0593379192754576e+01 6.2753721698962551e+01 2.1209936355479680e+01 0 0 0
875 1 11 -1.1500000000000000e-01 3.3747918950243701e+01 5.9126004597613296e+01 1.3628801943775500e+01 0 0 0
934 1 11 -1.1500000000000000e-01 3.5870384009625084e+01 5.7006998880910828e+01 9.7966962880395982e+00 0 0 0
933 1 11 -1.1500000000000000e-01 3.6631221007326303e+01 5.6023696432911862e+01 9.1467315258134878e+00 0 0 0
939 1 13 1.1500000000000000e-01 3.5617142420055927e+01 5.9153831605591400e+01 1.0351388214626528e+01 0 0 0
884 1 13 1.1500000000000000e-01 3.2980342681203474e+01 5.7066335976588462e+01 1.3543700662894990e+01 0 0 0
938 1 13 1.1500000000000000e-01 3.4937994605052111e+01 5.6654912125448632e+01 1.0212731040035342e+01 0 0 0
833 1 6 1.3100000000000001e-01 3.4346804022964164e+01 5.9021012142207830e+01 1.4986526729760767e+01 0 0 0
832 1 5 -2.9999999999999999e-01 3.5677249457898945e+01 5.8930499301768045e+01 1.4944037567124518e+01 0 0 0
831 1 9 2.2900000000000001e-01 3.5628584913124406e+01 5.8420955433918905e+01 1.7378753852054206e+01 0 0 0
829 1 7 -7.2999999999999995e-02 3.6294415417366324e+01 5.8306998264034547e+01 1.8685887601573949e+01 0 0 0
836 1 9 2.2900000000000001e-01 3.6267372266608731e+01 5.8953921432149471e+01 1.6231876792411665e+01 0 0 0
830 1 8 -1.6700000000000001e-01 3.7479213260718403e+01 5.9159172317449716e+01 1.8777994490500642e+01 0 0 0
965 1 18 5.9999999999999998e-02 4.3481453527542158e+01 5.0673538920862029e+01 1.3405679544608203e+01 0 0 0
809 1 18 5.9999999999999998e-02 2.5157457337532087e+01 6.4395381240993856e+01 2.4828042008240601e+01 0 0 0
803 1 18 5.9999999999999998e-02 2.7174276862065323e+01 6.3127839933960622e+01 2.2417109004123354e+01 0 0 0
802 1 18 5.9999999999999998e-02 2.7752609861172949e+01 6.4775543292317877e+01 2.2241283698261245e+01 0 0 0
801 1 17 -1.2000000000000000e-01 2.7805805479016776e+01 6.3889674707990885e+01 2.2874140785334848e+01 0 0 0
807 1 17 -1.2000000000000000e-01 2.5754020769416858e+01 6.4012548242126712e+01 2.4000001567554744e+01 0 0 0
804 1 17 -1.2000000000000000e-01 2.7188947443830301e+01 6.4119011800184751e+01 2.4157058329346007e+01 0 0 0
881 1 13 1.1500000000000000e-01 3.4600729400828122e+01 6.1100082899990106e+01 1.3310263087250085e+01 0 0 0
911 1 1 -1.1600000000000001e-01 3.7782530807103527e+01 6.0585259278882965e+01 1.3741704656607784e+01 0 0 0
915 1 2 1.0800000000000000e-01 3.9338702855339207e+01 6.1305465126974759e+01 1.3221142361491157e+01 0 0 0
914 1 3 -2.2400000000000000e-01 4.0175478706350788e+01 6.1234816226373503e+01 1.4252170233923010e+01 0 0 0
912 1 2 1.0800000000000000e-01 3.8435550912111779e+01 6.0016523777770452e+01 1.5178994192261021e+01 0 0 0
834 1 7 -7.2999999999999995e-02 3.7605534815131186e+01 5.9635379188931218e+01 1.6343249642177557e+01 0 0 0
916 1 4 1.7399999999999999e-01 4.0139654260985630e+01 6.0487413011591016e+01 1.6375161716951915e+01 0 0 0
913 1 3 -2.2400000000000000e-01 3.9663977053032788e+01 6.0552264048259381e+01 1.5407729271311794e+01 0 0 0
835 1 8 -1.6700000000000001e-01 3.8052859680137075e+01 5.9742650749465071e+01 1.7686726593884405e+01 0 0 0
838 1 10 1.4499999999999999e-01 3.8877058945657851e+01 6.0440465489118623e+01 1.7698980566190830e+01 0 0 0
917 1 4 1.7399999999999999e-01 4.1241512371722294e+01 6.1393385344287587e+01 1.4182685997303999e+01 0 0 0
1046 1 18 5.9999999999999998e-02 4.2044820334990831e+01 6.6389325126114514e+01 1.5808911527267050e+01 0 0 0
1055 1 18 5.9999999999999998e-02 4.3822683253423406e+01 6.5857189140232364e+01 1.7647371647292378e+01 0 0 0
1051 1 18 5.9999999999999998e-02 4.2645612743721195e+01 6.4192068923233677e+01 1.6080143726240973e+01 0 0 0
1042 1 18 5.9999999999999998e-02 4.2934852597616768e+01 6.8302666175660477e+01 1.4454590869563965e+01 0 0 0
1041 1 17 -1.2000000000000000e-01 4.2346669646243058e+01 6.7534296440369246e+01 1.3952845268508135e+01 0 0 0
1040 1 18 5.9999999999999998e-02 4.0522992765976184e+01 6.7258042674448774e+01 1.3007810279120463e+01 0 0 0
1043 1 18 5.9999999999999998e-02 4.2840796501364899e+01 6.7395943237882278e+01 1.2991181598012997e+01 0 0 0
1048 1 18 5.9999999999999998e-02 4.4348503409472670e+01 6.5181566010630036e+01 1.4163526882433676e+01 0 0 0
1044 1 17 -1.2000000000000000e-01 4.2566164303936155e+01 6.6265680318579200e+01 1.4859694793326875e+01 0 0 0
1047 1 17 -1.2000000000000000e-01 4.3947435635115077e+01 6.5658459709944282e+01 1.5057851792288888e+01 0 0 0
1050 1 17 -1.2000000000000000e-01 4.3685804801540328e+01 6.4509845693133784e+01 1.6008598324719188e+01 0 0 0
1049 1 18 5.9999999999999998e-02 4.4913364134520627e+01 6.6063326611773419e+01 1.5359787120343118e+01 0 0 0
1045 1 18 5.9999999999999998e-02 4.1868155502509829e+01 6.5486676201629891e+01 1.4553040383891577e+01 0 0 0
1053 1 19 -1.7999999999999999e-01 4.4009667335185334e+01 6.4803724499378276e+01 1.7439166929435107e+01 0 0 0
1052 1 18 5.9999999999999998e-02 4.4210877160615198e+01 6.3623276879247548e+01 1.5653077320179804e+01 0 0 0
1056 1 18 5.9999999999999998e-02 4.5071289352158487e+01 6.4801277153571576e+01 1.7686255385382331e+01 0 0 0
782 1 18 5.9999999999999998e-02 2.7173419486724942e+01 4.7227280342173259e+01 1.7287163507620527e+01 0 0 0
781 1 18 5.9999999999999998e-02 2.7872908050353132e+01 4.7986423212657527e+01 1.5975639140583652e+01 0 0 0
783 1 18 5.9999999999999998e-02 2.8225573847262670e+01 4.8583861092461298e+01 1.7671747003037268e+01 0 0 0
776 1 18 5.9999999999999998e-02 2.4696276025501387e+01 4.7943885098419585e+01 1.7869746245519643e+01 0 0 0
778 1 18 5.9999999999999998e-02 2.5924653748870142e+01 4.9190740939763742e+01 1.5826129420209249e+01 0 0 0
780 1 19 -1.7999999999999999e-01 2.7479262252435596e+01 4.8222427440082285e+01 1.6964297325520036e+01 0 0 0
769 1 18 5.9999999999999998e-02 2.5286272398451292e+01 5.1590073937205503e+01 1.7956703785964113e+01 0 0 0
766 1 18 5.9999999999999998e-02 2.2432787766645966e+01 5.1582154378007729e+01 1.9095973323541187e+01 0 0 0
765 1 17 -1.2000000000000000e-01 2.3391383266903425e+01 5.2060406353660987e+01 1.8894801829895314e+01 0 0 0
770 1 18 5.9999999999999998e-02 2.3931297028696104e+01 5.2039119308730321e+01 1.6910712979779596e+01 0 0 0
768 1 17 -1.2000000000000000e-01 2.4221941929068258e+01 5.1441314389116918e+01 1.7774574067163424e+01 0 0 0
774 1 17 -1.2000000000000000e-01 2.5117130629000606e+01 4.8946279959305059e+01 1.7791083491391216e+01 0 0 0
775 1 18 5.9999999999999998e-02 2.5358064081404972e+01 4.9185400539066343e+01 1.8826879305251062e+01 0 0 0
777 1 17 -1.2000000000000000e-01 2.6278757982958616e+01 4.9127438280778776e+01 1.6855062488408642e+01 0 0 0
779 1 18 5.9999999999999998e-02 2.6672234101829879e+01 5.0143061103421722e+01 1.6897333365597628e+01 0 0 0
773 1 18 5.9999999999999998e-02 2.3353328040244413e+01 4.9371474680829465e+01 1.8263217051849491e+01 0 0 0
771 1 17 -1.2000000000000000e-01 2.3930057074022940e+01 4.9971595963100590e+01 1.7559414125434717e+01 0 0 0
772 1 18 5.9999999999999998e-02 2.3503578819976990e+01 5.0014913162664932e+01 1.6557246513970863e+01 0 0 0
760 1 16 2.9999999999999999e-02 2.5866008281534700e+01 5.1988845651937218e+01 2.1255608943652536e+01 0 0 0
759 1 15 1.4000000000000001e-01 2.5166852778901351e+01 5.2574211370944035e+01 2.0658424792188153e+01 0 0 0
762 1 17 -1.2000000000000000e-01 2.3855245752492959e+01 5.1885234985479535e+01 2.0335583292680525e+01 0 0 0
764 1 18 5.9999999999999998e-02 2.3157782208112959e+01 5.2222497268910523e+01 2.1102328895749199e+01 0 0 0
767 1 18 5.9999999999999998e-02 2.3339306967701990e+01 5.3110309797884355e+01 1.8606547019517247e+01 0 0 0
863 1 18 5.9999999999999998e-02 3.1882858686364226e+01 5.2075390361107296e+01 1.9297196288779904e+01 0 0 0
873 1 18 5.9999999999999998e-02 3.3738070025672322e+01 4.7703613644639148e+01 1.8688426843849459e+01 0 0 0
874 1 18 5.9999999999999998e-02 3.3743924207941660e+01 4.7637343627088434e+01 2.0535355792088996e+01 0 0 0
871 1 19 -1.7999999999999999e-01 3.3772471744434796e+01 4.8247359977582498e+01 1.9632490850563745e+01 0 0 0
872 1 18 5.9999999999999998e-02 3.4805903152925907e+01 4.8532437815515699e+01 1.9829595262436399e+01 0 0 0
758 1 14 -2.8499999999999998e-01 2.4720690348193461e+01 5.3624746658190773e+01 2.1515516712334239e+01 0 0 0
755 1 13 1.1500000000000000e-01 2.3883686902755837e+01 5.5081673354527538e+01 2.3257710819135593e+01 0 0 0
751 1 11 -1.1500000000000000e-01 2.4920406768393118e+01 5.5250800315481150e+01 2.3006696892686072e+01 0 0 0
756 1 13 1.1500000000000000e-01 2.5354527725376183e+01 5.7009001354638187e+01 2.4234256047359391e+01 0 0 0
752 1 11 -1.1500000000000000e-01 2.5750226792937092e+01 5.6259130495005294e+01 2.3565289723988130e+01 0 0 0
858 1 18 5.9999999999999998e-02 3.1226951141790753e+01 5.1606143599937951e+01 1.5781845082331163e+01 0 0 0
731 1 3 -2.2400000000000000e-01 2.9269647852159444e+01 5.1454464415126544e+01 2.6025966657981311e+01 0 0 0
735 1 4 1.7399999999999999e-01 2.9273153132042090e+01 5.3494742154969337e+01 2.4940595404335440e+01 0 0 0
750 1 12 2.3499999999999999e-01 2.5567933457433195e+01 5.4374358224002876e+01 2.2120762183801450e+01 0 0 0
754 1 13 1.1500000000000000e-01 2.7534629459839927e+01 5.3922231554453852e+01 2.1159465380851461e+01 0 0 0
749 1 11 -1.1500000000000000e-01 2.6954002958983214e+01 5.4485499716411077e+01 2.1875008422343875e+01 0 0 0
748 1 11 -1.1500000000000000e-01 2.7841801893421707e+01 5.5452293626615621e+01 2.2516503706854415e+01 0 0 0
753 1 11 -1.1500000000000000e-01 2.7174776954962894e+01 5.6282082203049526e+01 2.3387745289327309e+01 0 0 0
757 1 13 1.1500000000000000e-01 2.7941186511627230e+01 5.6697672631293678e+01 2.4025162725083042e+01 0 0 0
859 1 17 -1.2000000000000000e-01 3.0552626703884830e+01 5.1069930074525558e+01 1.7823676165558435e+01 0 0 0
861 1 18 5.9999999999999998e-02 2.9817017151909173e+01 5.1737655010340113e+01 1.8272142453404676e+01 0 0 0
742 1 6 1.3100000000000001e-01 3.0194115826081877e+01 5.6461793363760570e+01 2.1698724853902394e+01 0 0 0
737 1 6 1.3100000000000001e-01 2.9315513438889276e+01 5.5449306805123165e+01 2.2400828074702108e+01 0 0 0
732 1 3 -2.2400000000000000e-01 2.9741330501770783e+01 5.2539831678870961e+01 2.5128627138655720e+01 0 0 0
733 1 2 1.0800000000000000e-01 3.0908035659783454e+01 5.2224711270226727e+01 2.4416361872414189e+01 0 0 0
736 1 5 -2.9999999999999999e-01 2.9925350623776701e+01 5.4378974258551075e+01 2.2884630332720679e+01 0 0 0
745 1 9 2.2900000000000001e-01 3.2115861318290683e+01 5.5289883279339797e+01 2.2298060920152114e+01 0 0 0
740 1 9 2.2900000000000001e-01 3.1302819724588918e+01 5.4257334453036108e+01 2.2912145254354719e+01 0 0 0
738 1 7 -7.2999999999999995e-02 3.1838646693823051e+01 5.3134552060629716e+01 2.3596089058012485e+01 0 0 0
862 1 17 -1.2000000000000000e-01 3.1950970013119136e+01 5.1504711360765640e+01 1.8371028743782457e+01 0 0 0
864 1 18 5.9999999999999998e-02 3.2325124907800756e+01 5.2308530583373404e+01 1.7737007673075798e+01 0 0 0
867 1 18 5.9999999999999998e-02 3.4174601138091802e+01 5.0707110703920506e+01 1.8346764626800336e+01 0 0 0
865 1 17 -1.2000000000000000e-01 3.3112174389019657e+01 5.0494385364093169e+01 1.8465501052093973e+01 0 0 0
744 1 8 -1.6700000000000001e-01 3.4055397418019879e+01 5.4099479479790418e+01 2.3059940892787068e+01 0 0 0
739 1 8 -1.6700000000000001e-01 3.3210792521676943e+01 5.3167383479716086e+01 2.3684086348109425e+01 0 0 0
746 1 10 1.4499999999999999e-01 3.3514872226833099e+01 5.2307781243651121e+01 2.4262895063199540e+01 0 0 0
729 1 1 -1.1600000000000001e-01 3.1429156082018935e+01 5.0837448871116699e+01 2.5096487925992857e+01 0 0 0
815 1 18 5.9999999999999998e-02 2.3333934825890779e+01 6.3657403600842294e+01 2.3273306269451307e+01 0 0 0
818 1 18 5.9999999999999998e-02 2.1832414898158966e+01 6.2767012150700140e+01 2.4951490437869893e+01 0 0 0
813 1 17 -1.2000000000000000e-01 2.3633987196034894e+01 6.2690339804053927e+01 2.3676860758635055e+01 0 0 0
816 1 19 -1.7999999999999999e-01 2.2880018758872293e+01 6.2468091106452874e+01 2.4987161048153947e+01 0 0 0
819 1 18 5.9999999999999998e-02 2.2944595098184728e+01 6.1451870311042022e+01 2.5376039522897603e+01 0 0 0
721 1 18 5.9999999999999998e-02 3.0295728379038891e+01 5.6661509034884531e+01 2.6841251779874664e+01 0 0 0
817 1 18 5.9999999999999998e-02 2.3267575843214122e+01 6.3129068146392257e+01 2.5762408663385894e+01 0 0 0
708 1 18 5.9999999999999998e-02 2.6349684976527779e+01 5.7386704846347108e+01 3.0535345163063276e+01 0 0 0
785 1 11 -1.1500000000000000e-01 2.9698851382472995e+01 5.8910812499653225e+01 2.2009800763841756e+01 0 0 0
784 1 11 -1.1500000000000000e-01 2.9687209729537582e+01 5.7647730365243042e+01 2.1215322991055494e+01 0 0 0
741 1 5 -2.9999999999999999e-01 3.1495616203865982e+01 5.6427763235653600e+01 2.1726285068935741e+01 0 0 0
814 1 18 5.9999999999999998e-02 2.3244515716909660e+01 6.2113131154598086e+01 2.2838264532095398e+01 0 0 0
790 1 13 1.1500000000000000e-01 2.9808282836689344e+01 5.8906448309728127e+01 2.3084233502860073e+01 0 0 0
726 1 18 5.9999999999999998e-02 3.3826159575617559e+01 5.5217485643105839e+01 2.8023016707847692e+01 0 0 0
717 1 18 5.9999999999999998e-02 2.8508369057493692e+01 5.6531080999030763e+01 2.8433504701346109e+01 0 0 0
723 1 18 5.9999999999999998e-02 3.1139308448174003e+01 5.4648801096077683e+01 2.8548421301272619e+01 0 0 0
722 1 17 -1.2000000000000000e-01 3.1660889207133810e+01 5.5604747041042543e+01 2.8501295244263254e+01 0 0 0
720 1 18 5.9999999999999998e-02 3.1394914621387088e+01 5.7527275097720000e+01 2.7990949959429788e+01 0 0 0
719 1 17 -1.2000000000000000e-01 3.0732407088115053e+01 5.6675009092357939e+01 2.7839865786903498e+01 0 0 0
716 1 17 -1.2000000000000000e-01 2.9487500572287249e+01 5.6713166368399285e+01 2.8876501761247226e+01 0 0 0
725 1 19 -1.7999999999999999e-01 3.2920455176459278e+01 5.5624321780370259e+01 2.7573256883189256e+01 0 0 0
727 1 18 5.9999999999999998e-02 3.2548742299615760e+01 5.5190042491816136e+01 2.6645177461042458e+01 0 0 0
728 1 18 5.9999999999999998e-02 3.3418022721712575e+01 5.6594076036829669e+01 2.7562968343365519e+01 0 0 0
724 1 18 5.9999999999999998e-02 3.1948233960135354e+01 5.5737219281699097e+01 2.9544360044232182e+01 0 0 0
718 1 18 5.9999999999999998e-02 2.9374056792208865e+01 5.5846716273304573e+01 2.9528034343541766e+01 0 0 0
837 1 10 1.4499999999999999e-01 3.7838539503077534e+01 5.9409781650078450e+01 1.9765151830518658e+01 0 0 0
743 1 7 -7.2999999999999995e-02 3.3583289534376441e+01 5.5090743898427739e+01 2.2292975825290888e+01 0 0 0
747 1 10 1.4499999999999999e-01 3.5105461500277379e+01 5.3895136784096096e+01 2.2911584949633170e+01 0 0 0
820 1 1 -1.1600000000000001e-01 3.4323163545768665e+01 5.6715099049079626e+01 1.9939283947614935e+01 0 0 0
824 1 2 1.0800000000000000e-01 3.5785668966175074e+01 5.7519388329404926e+01 1.9862924078169428e+01 0 0 0
823 1 3 -2.2400000000000000e-01 3.6555006349534324e+01 5.7140140112905961e+01 2.0970170666314917e+01 0 0 0
821 1 2 1.0800000000000000e-01 3.4494980602194595e+01 5.6027721875906387e+01 2.1548452278992514e+01 0 0 0
826 1 4 1.7399999999999999e-01 3.7501248437940220e+01 5.7605129570803207e+01 2.1204287547751665e+01 0 0 0
822 1 3 -2.2400000000000000e-01 3.5736724319869971e+01 5.6373685892059960e+01 2.1924107249818380e+01 0 0 0
825 1 4 1.7399999999999999e-01 3.6063067436147897e+01 5.6118497695894092e+01 2.2921493411240135e+01 0 0 0
810 1 17 -1.2000000000000000e-01 2.5111100666453755e+01 6.2584473306318806e+01 2.3778587193167471e+01 0 0 0
811 1 18 5.9999999999999998e-02 2.5350937177033245e+01 6.2107226060452454e+01 2.4728752383333436e+01 0 0 0
812 1 18 5.9999999999999998e-02 2.5641598583152899e+01 6.2048793863763358e+01 2.2991364542003545e+01 0 0 0
805 1 18 5.9999999999999998e-02 2.7405296708211818e+01 6.5079986573975432e+01 2.4623770745927352e+01 0 0 0
806 1 18 5.9999999999999998e-02 2.7492123954616186e+01 6.3364759009849834e+01 2.4883203446841200e+01 0 0 0
1054 1 18 5.9999999999999998e-02 4.3595815426639035e+01 6.3968851675219476e+01 1.8004688038151812e+01 0 0 0
596 1 18 5.9999999999999998e-02 1.7458332959981124e+01 3.7363509927201832e+01 3.3559154662372308e+01 0 0 0
637 1 18 5.9999999999999998e-02 2.5739918909507701e+01 2.9271396758471617e+01 2.4130153206208711e+01 0 0 0
630 1 18 5.9999999999999998e-02 2.4082357553550658e+01 3.0917917374984032e+01 2.7382552354499374e+01 0 0 0
628 1 17 -1.2000000000000000e-01 2.4937458268875197e+01 3.0651367556284278e+01 2.6761380911490935e+01 0 0 0
622 1 17 -1.2000000000000000e-01 2.5972484581105689e+01 3.2666103674345976e+01 2.7854506256483020e+01 0 0 0
624 1 18 5.9999999999999998e-02 2.6620953347062734e+01 3.2599527143884373e+01 2.8728094466094959e+01 0 0 0
620 1 18 5.9999999999999998e-02 2.5829278870502012e+01 3.3727962972544702e+01 2.6155184237993911e+01 0 0 0
619 1 17 -1.2000000000000000e-01 2.6559370594953549e+01 3.3611010881379762e+01 2.6956051341371914e+01 0 0 0
621 1 18 5.9999999999999998e-02 2.7494078386525874e+01 3.3212133116804175e+01 2.6561947453938249e+01 0 0 0
625 1 17 -1.2000000000000000e-01 2.6041976566222509e+01 3.1136772296222063e+01 2.7564804439930860e+01 0 0 0
623 1 18 5.9999999999999998e-02 2.5199618008695431e+01 3.3027058435551339e+01 2.8533099598042213e+01 0 0 0
626 1 18 5.9999999999999998e-02 2.5987850662647947e+01 3.0504077314632113e+01 2.8450733435221540e+01 0 0 0
627 1 18 5.9999999999999998e-02 2.6892510233910141e+01 3.0752812429113781e+01 2.7001539090788953e+01 0 0 0
633 1 18 5.9999999999999998e-02 2.6211926873094193e+01 2.8895414918240373e+01 2.6327653947274655e+01 0 0 0
629 1 18 5.9999999999999998e-02 2.4816421318467423e+01 3.1267073632738118e+01 2.5870114293465221e+01 0 0 0
617 1 18 5.9999999999999998e-02 2.7988984068589037e+01 3.4680065223439762e+01 2.8036847413184667e+01 0 0 0
616 1 17 -1.2000000000000000e-01 2.7175384885558305e+01 3.4967326212845599e+01 2.7370785132414806e+01 0 0 0
618 1 18 5.9999999999999998e-02 2.6391328411039428e+01 3.5536736089160165e+01 2.7869911036029002e+01 0 0 0
610 1 13 1.1500000000000000e-01 2.4027950470800487e+01 4.0301994655476534e+01 2.6692448871578172e+01 0 0 0
613 1 15 1.4000000000000001e-01 2.7646583040470251e+01 3.5843795901826049e+01 2.6199402083450206e+01 0 0 0
615 1 16 2.9999999999999999e-02 2.8490012877963771e+01 3.6299309525242862e+01 2.6718279442449898e+01 0 0 0
612 1 14 -2.8499999999999998e-01 2.6705937368564477e+01 3.6857636342423909e+01 2.5659617018819350e+01 0 0 0
614 1 16 2.9999999999999999e-02 2.7931503160784690e+01 3.5362522585103498e+01 2.5263829253007565e+01 0 0 0
609 1 13 1.1500000000000000e-01 2.5064551851075606e+01 3.8543775543354904e+01 2.5232257363086848e+01 0 0 0
605 1 11 -1.1500000000000000e-01 2.5295833240264162e+01 3.8665548274704804e+01 2.6280150640531932e+01 0 0 0
604 1 12 2.3499999999999999e-01 2.6198186074174124e+01 3.7685191795198030e+01 2.6691200139626499e+01 0 0 0
606 1 11 -1.1500000000000000e-01 2.4773571017890823e+01 3.9654051267094303e+01 2.7129048648500319e+01 0 0 0
603 1 11 -1.1500000000000000e-01 2.6731588697309572e+01 3.7873222349715753e+01 2.8013741056653608e+01 0 0 0
608 1 13 1.1500000000000000e-01 2.7560696505706943e+01 3.7312711904971017e+01 2.8419706921458232e+01 0 0 0
540 1 17 -1.2000000000000000e-01 2.3664903494890954e+01 4.3577791682468515e+01 2.7330951460106448e+01 0 0 0
541 1 18 5.9999999999999998e-02 2.2902995956308704e+01 4.2800482075099175e+01 2.7389149055798221e+01 0 0 0
536 1 18 5.9999999999999998e-02 2.2865176248359852e+01 4.3726538911271355e+01 2.9909882119778040e+01 0 0 0
538 1 18 5.9999999999999998e-02 2.3977158006567304e+01 4.5781622038025127e+01 2.7921098145837448e+01 0 0 0
542 1 18 5.9999999999999998e-02 2.4634257891175601e+01 4.3080126126899657e+01 2.7358899153677473e+01 0 0 0
537 1 17 -1.2000000000000000e-01 2.3448118302889860e+01 4.4886141525513352e+01 2.8247185805120377e+01 0 0 0
535 1 18 5.9999999999999998e-02 2.3405058832399845e+01 4.5215993491622690e+01 3.0510413015062316e+01 0 0 0
534 1 17 -1.2000000000000000e-01 2.3622066235188317e+01 4.4489384053261112e+01 2.9727440134389639e+01 0 0 0
649 1 9 2.2900000000000001e-01 2.8716704834287107e+01 4.7505156040030300e+01 2.8205521158515001e+01 0 0 0
645 1 5 -2.9999999999999999e-01 2.7863660040920085e+01 4.7507326072482243e+01 2.9324535141790374e+01 0 0 0
642 1 2 1.0800000000000000e-01 2.9175328072182825e+01 4.4812414056326240e+01 2.8005317668568708e+01 0 0 0
647 1 7 -7.2999999999999995e-02 2.9224878406013225e+01 4.6225185550792574e+01 2.7503850126147238e+01 0 0 0
644 1 4 1.7399999999999999e-01 2.7760368259536634e+01 4.3758161583532910e+01 2.6726567377035931e+01 0 0 0
656 1 10 1.4499999999999999e-01 3.0590189192563663e+01 4.8108566393231001e+01 2.4879503589390694e+01 0 0 0
655 1 10 1.4499999999999999e-01 2.9815184347701813e+01 4.5534251565763192e+01 2.5687265704199017e+01 0 0 0
648 1 8 -1.6700000000000001e-01 2.9675216818308186e+01 4.6446666662253300e+01 2.6247897296612791e+01 0 0 0
641 1 3 -2.2400000000000000e-01 2.8395231570446111e+01 4.3747171841757556e+01 2.7600196475702393e+01 0 0 0
653 1 8 -1.6700000000000001e-01 3.0025116793063773e+01 4.7790524500552714e+01 2.5743183239391232e+01 0 0 0
643 1 4 1.7399999999999999e-01 2.7794688764387224e+01 4.1739269048322029e+01 2.8245444874350621e+01 0 0 0
640 1 3 -2.2400000000000000e-01 2.8338126416688695e+01 4.2638170529988379e+01 2.8496545739182078e+01 0 0 0
545 1 18 5.9999999999999998e-02 2.2490949992756772e+01 4.4604522430847993e+01 2.5640383160297091e+01 0 0 0
543 1 19 -1.7999999999999999e-01 2.3516630287306231e+01 4.4289438288357481e+01 2.5832222641980138e+01 0 0 0
546 1 18 5.9999999999999998e-02 2.4186221493074907e+01 4.5068534246307863e+01 2.5467860941045934e+01 0 0 0
709 1 18 5.9999999999999998e-02 2.6871160768442415e+01 5.7641410302071705e+01 3.2192853983184555e+01 0 0 0
544 1 18 5.9999999999999998e-02 2.3588941301911557e+01 4.3445159389108312e+01 2.5146610369762922e+01 0 0 0
734 1 4 1.7399999999999999e-01 2.8305610165628387e+01 5.1370257222899134e+01 2.6505487760462753e+01 0 0 0
730 1 2 1.0800000000000000e-01 2.9980997857847878e+01 5.0295259297316640e+01 2.5917647944316606e+01 0 0 0
652 1 7 -7.2999999999999995e-02 2.9762513860279537e+01 4.8938989274591478e+01 2.6390429133936493e+01 0 0 0
654 1 9 2.2900000000000001e-01 2.9086689289269351e+01 4.8848563920253270e+01 2.7665991368773039e+01 0 0 0
666 1 13 1.1500000000000000e-01 2.5188580842358462e+01 4.8417696031922091e+01 3.0226811980437290e+01 0 0 0
650 1 5 -2.9999999999999999e-01 2.8760708393460146e+01 4.9884747510551726e+01 2.8418599715520493e+01 0 0 0
646 1 6 1.3100000000000001e-01 2.7656080072114868e+01 4.8546054656805083e+01 3.0065383081501331e+01 0 0 0
699 1 13 1.1500000000000000e-01 2.6754419479127137e+01 5.2106072648489999e+01 2.9649507805163928e+01 0 0 0
693 1 11 -1.1500000000000000e-01 2.8383547388513602e+01 5.1117907315540968e+01 3.0332607589092582e+01 0 0 0
651 1 6 1.3100000000000001e-01 2.8034409788429702e+01 4.9883490680823719e+01 2.9545304128709585e+01 0 0 0
695 1 12 2.3499999999999999e-01 2.8125719997965557e+01 5.3457794300588553e+01 3.0845829513532326e+01 0 0 0
703 1 14 -2.8499999999999998e-01 2.7658046189696108e+01 5.4749922046067780e+01 3.0511529710028761e+01 0 0 0
704 1 15 1.4000000000000001e-01 2.7287325595734327e+01 5.5659698247803711e+01 3.1519360903513839e+01 0 0 0
694 1 11 -1.1500000000000000e-01 2.7632983494993223e+01 5.2247112370913669e+01 3.0261580567769737e+01 0 0 0
698 1 11 -1.1500000000000000e-01 2.9591620936443192e+01 5.1119174096007306e+01 3.1078058702995982e+01 0 0 0
697 1 11 -1.1500000000000000e-01 3.0068005579913855e+01 5.2244166386780861e+01 3.1781259366534211e+01 0 0 0
696 1 11 -1.1500000000000000e-01 2.9233656209285847e+01 5.3369467283134227e+01 3.1655322803777171e+01 0 0 0
657 1 11 -1.1500000000000000e-01 2.6957296245549088e+01 4.8124053176973234e+01 3.1329152402969918e+01 0 0 0
662 1 11 -1.1500000000000000e-01 2.5527017826732294e+01 4.8160962464931643e+01 3.1219761265742594e+01 0 0 0
702 1 13 1.1500000000000000e-01 3.0077537398397965e+01 5.0156627991980365e+01 3.1139623218944028e+01 0 0 0
707 1 17 -1.2000000000000000e-01 2.7129924219836621e+01 5.7145585162883513e+01 3.1257279785528311e+01 0 0 0
710 1 17 -1.2000000000000000e-01 2.8594279829305748e+01 5.7825202149500200e+01 3.0987827682992709e+01 0 0 0
712 1 18 5.9999999999999998e-02 2.9396963661409792e+01 5.7440636493640412e+01 3.1617040539286211e+01 0 0 0
715 1 18 5.9999999999999998e-02 2.8636748233274734e+01 5.8756475268158894e+01 2.9118926275107693e+01 0 0 0
711 1 18 5.9999999999999998e-02 2.8276194074925645e+01 5.8818783016713809e+01 3.1303610072273468e+01 0 0 0
714 1 18 5.9999999999999998e-02 3.0110875122274628e+01 5.8630716605968637e+01 2.9889231697903455e+01 0 0 0
713 1 17 -1.2000000000000000e-01 2.9234524339715758e+01 5.8023954349570431e+01 2.9661308447463085e+01 0 0 0
706 1 16 2.9999999999999999e-02 2.8065815130639272e+01 5.5568708657592552e+01 3.2276840231884499e+01 0 0 0
705 1 16 2.9999999999999999e-02 2.6450615118767896e+01 5.5172333632478583e+01 3.2019851958887955e+01 0 0 0
700 1 13 1.1500000000000000e-01 2.9850762163175041e+01 5.4174042792988011e+01 3.2027127175211980e+01 0 0 0
701 1 13 1.1500000000000000e-01 3.1105227182822361e+01 5.2395529013853540e+01 3.2041376074159011e+01 0 0 0
595 1 17 -1.2000000000000000e-01 1.7874693328037942e+01 3.8267759240784258e+01 3.3115220762486274e+01 0 0 0
597 1 18 5.9999999999999998e-02 1.8964375441770315e+01 3.8274543857571800e+01 3.3140856673864839e+01 0 0 0
601 1 18 5.9999999999999998e-02 1.6557170269793250e+01 4.0123393218046083e+01 3.3790841188374245e+01 0 0 0
599 1 18 5.9999999999999998e-02 1.8213142642752455e+01 4.0486365348678206e+01 3.3723058782239960e+01 0 0 0
600 1 18 5.9999999999999998e-02 1.7576116497160584e+01 3.9430709561289788e+01 3.5046929501171576e+01 0 0 0
598 1 19 -1.7999999999999999e-01 1.7532181041661122e+01 3.9676889102864173e+01 3.3986002872447401e+01 0 0 0
635 1 18 5.9999999999999998e-02 2.4377647280071997e+01 2.8298160722464285e+01 2.4490455387383751e+01 0 0 0
585 1 18 5.9999999999999998e-02 1.8443050174700854e+01 3.4351272156643780e+01 3.0267014823889436e+01 0 0 0
580 1 17 -1.2000000000000000e-01 2.0644457669720307e+01 3.5009510854630918e+01 3.0598474683252732e+01 0 0 0
581 1 18 5.9999999999999998e-02 2.0999356314670308e+01 3.4124545576062459e+01 3.0070285498265260e+01 0 0 0
591 1 18 5.9999999999999998e-02 1.9739586936909149e+01 3.7954340397300207e+01 3.1134039728649181e+01 0 0 0
594 1 18 5.9999999999999998e-02 1.6609085172936776e+01 3.8519482344272220e+01 3.1360625046824104e+01 0 0 0
589 1 17 -1.2000000000000000e-01 1.8716651653687048e+01 3.7750881213314784e+01 3.0817324215743295e+01 0 0 0
590 1 18 5.9999999999999998e-02 1.8541255101885017e+01 3.7861045701846919e+01 2.9747184028777390e+01 0 0 0
592 1 17 -1.2000000000000000e-01 1.7665374859715005e+01 3.8521908231683440e+01 3.1629598779049477e+01 0 0 0
593 1 18 5.9999999999999998e-02 1.7974487023360503e+01 3.9526288090217321e+01 3.1340166643964853e+01 0 0 0
582 1 18 5.9999999999999998e-02 2.0605266342287358e+01 3.4850762636137425e+01 3.1676140504105732e+01 0 0 0
584 1 18 5.9999999999999998e-02 1.9001009198832985e+01 3.5565633397735006e+01 2.9253432252097458e+01 0 0 0
587 1 18 5.9999999999999998e-02 1.8803258430398632e+01 3.6055840197381563e+01 3.2109942652073407e+01 0 0 0
583 1 17 -1.2000000000000000e-01 1.9117958658773066e+01 3.5207144354184322e+01 3.0276128890474585e+01 0 0 0
586 1 17 -1.2000000000000000e-01 1.8346042197289126e+01 3.6239534591827585e+01 3.1137672211338721e+01 0 0 0
588 1 18 5.9999999999999998e-02 1.7321245605665098e+01 3.5868488237558907e+01 3.1152502404832813e+01 0 0 0
578 1 16 2.9999999999999999e-02 2.1743844284569469e+01 3.6262674035922565e+01 2.9125465098226673e+01 0 0 0
577 1 15 1.4000000000000001e-01 2.1826460750559029e+01 3.6051614609140998e+01 3.0191639872873189e+01 0 0 0
632 1 18 5.9999999999999998e-02 2.4462362273539323e+01 2.8418200605229941e+01 2.6469524336457987e+01 0 0 0
636 1 18 5.9999999999999998e-02 2.4266127476912406e+01 3.0049501254099763e+01 2.4497673759004375e+01 0 0 0
634 1 19 -1.7999999999999999e-01 2.4887187890478714e+01 2.9208541155842813e+01 2.4806170267602386e+01 0 0 0
631 1 17 -1.2000000000000000e-01 2.5173999135034546e+01 2.9227634512679415e+01 2.6306767553440473e+01 0 0 0
579 1 16 2.9999999999999999e-02 2.1740209733821924e+01 3.7046528546293715e+01 3.0628455602997626e+01 0 0 0
573 1 13 1.1500000000000000e-01 2.3651900296455128e+01 3.4346634289502653e+01 3.2590669006173954e+01 0 0 0
574 1 13 1.1500000000000000e-01 2.4610831519943957e+01 3.5814371726279369e+01 3.4529366428321900e+01 0 0 0
569 1 11 -1.1500000000000000e-01 2.4159106936192856e+01 3.5285482819780476e+01 3.2424221231177896e+01 0 0 0
519 1 13 1.1500000000000000e-01 2.0797281071480612e+01 3.8385416150614539e+01 3.3365152194081460e+01 0 0 0
515 1 11 -1.1500000000000000e-01 2.1354225549971613e+01 3.9116489494587057e+01 3.3932377558122283e+01 0 0 0
514 1 11 -1.1500000000000000e-01 2.1435602499746594e+01 4.0439413708967365e+01 3.3604056031361893e+01 0 0 0
518 1 13 1.1500000000000000e-01 2.0914791785956151e+01 4.0733862617101757e+01 3.2704914195554252e+01 0 0 0
513 1 12 2.3499999999999999e-01 2.2261222217344923e+01 4.1395134815680478e+01 3.4264011165293866e+01 0 0 0
611 1 13 1.1500000000000000e-01 2.4459980011628389e+01 4.0181187025829516e+01 2.9179275290134008e+01 0 0 0
607 1 11 -1.1500000000000000e-01 2.5009703111676021e+01 3.9583594367793630e+01 2.8467174504896672e+01 0 0 0
602 1 11 -1.1500000000000000e-01 2.6196972510512389e+01 3.8869144874127393e+01 2.8873286058828445e+01 0 0 0
572 1 13 1.1500000000000000e-01 2.4616741374430855e+01 3.7106267371441518e+01 2.9874736504908803e+01 0 0 0
566 1 11 -1.1500000000000000e-01 2.5750666462122361e+01 3.7376020619518009e+01 3.1900154685558455e+01 0 0 0
560 1 6 1.3100000000000001e-01 2.6873897586216348e+01 3.9136583305654270e+01 3.0138757617195171e+01 0 0 0
555 1 6 1.3100000000000001e-01 2.6673856497277470e+01 3.8517052677938700e+01 3.1413198313280169e+01 0 0 0
559 1 5 -2.9999999999999999e-01 2.7813938957703652e+01 4.0040410809056347e+01 3.0018819091527448e+01 0 0 0
558 1 9 2.2900000000000001e-01 2.8107622579600111e+01 4.0159024533419156e+01 3.2283758415575242e+01 0 0 0
554 1 5 -2.9999999999999999e-01 2.7578390784779053e+01 3.8865346339255126e+01 3.2408964091913184e+01 0 0 0
576 1 14 -2.8499999999999998e-01 2.3094832366376504e+01 3.5196861672840221e+01 3.0258826186870021e+01 0 0 0
568 1 12 2.3499999999999999e-01 2.3992328558034689e+01 3.5738813685645582e+01 3.1181360109952063e+01 0 0 0
567 1 11 -1.1500000000000000e-01 2.4810167854371123e+01 3.6881120144346909e+01 3.0913146309845914e+01 0 0 0
575 1 13 1.1500000000000000e-01 2.6220025599185679e+01 3.7548881840844963e+01 3.3839597634461946e+01 0 0 0
570 1 11 -1.1500000000000000e-01 2.4723798540441909e+01 3.5957187514638328e+01 3.3464827982386176e+01 0 0 0
571 1 11 -1.1500000000000000e-01 2.5602641807542089e+01 3.7023376570552500e+01 3.3126098184770065e+01 0 0 0
524 1 16 2.9999999999999999e-02 2.4422686839314629e+01 4.2805367024541752e+01 3.4369405361795195e+01 0 0 0
539 1 18 5.9999999999999998e-02 2.2374031225598859e+01 4.5070471819931555e+01 2.8268617769137911e+01 0 0 0
533 1 18 5.9999999999999998e-02 2.5835277516685078e+01 4.4559512342001106e+01 2.9959992995808786e+01 0 0 0
531 1 17 -1.2000000000000000e-01 2.4989859598176213e+01 4.3899124013058085e+01 3.0153010601225258e+01 0 0 0
527 1 18 5.9999999999999998e-02 2.3508282414387004e+01 4.2693247216550205e+01 3.1507637417260362e+01 0 0 0
525 1 17 -1.2000000000000000e-01 2.4253371502071115e+01 4.2832837017012778e+01 3.2290871902928508e+01 0 0 0
521 1 14 -2.8499999999999998e-01 2.2342824687923521e+01 4.2704981579432854e+01 3.3964971913423810e+01 0 0 0
522 1 15 1.4000000000000001e-01 2.3711234404816228e+01 4.3202412596309536e+01 3.3645326338584368e+01 0 0 0
526 1 18 5.9999999999999998e-02 2.4688945539513707e+01 4.1835416274095998e+01 3.2231482386586158e+01 0 0 0
682 1 18 5.9999999999999998e-02 2.4391887157310226e+01 4.4951007560219168e+01 3.7783102180957620e+01 0 0 0
563 1 9 2.2900000000000001e-01 2.8281373406131348e+01 4.0775592267357254e+01 3.1048116052423111e+01 0 0 0
529 1 18 5.9999999999999998e-02 2.4956878249509831e+01 4.4601569357182200e+01 3.2127723172567919e+01 0 0 0
532 1 18 5.9999999999999998e-02 2.5364220207577574e+01 4.3173333836075074e+01 2.9431080720211341e+01 0 0 0
528 1 17 -1.2000000000000000e-01 2.5225118239423175e+01 4.3673378064745989e+01 3.1623136004826698e+01 0 0 0
530 1 18 5.9999999999999998e-02 2.6291390691428607e+01 4.3519384269267206e+01 3.1788813308884222e+01 0 0 0
556 1 7 -7.2999999999999995e-02 2.8486283394717255e+01 4.0870925522132268e+01 3.3495858126429958e+01 0 0 0
638 1 1 -1.1600000000000001e-01 2.9651458118179253e+01 4.4449695068291867e+01 2.9623149385942128e+01 0 0 0
639 1 2 1.0800000000000000e-01 2.8912345362845876e+01 4.2940023094814855e+01 2.9581898062234128e+01 0 0 0
561 1 7 -7.2999999999999995e-02 2.8942766956795765e+01 4.2093854697323330e+01 3.0832734347998599e+01 0 0 0
562 1 8 -1.6700000000000001e-01 2.9406793584614846e+01 4.2649829454404113e+01 3.2033636102611453e+01 0 0 0
557 1 8 -1.6700000000000001e-01 2.9230589802175039e+01 4.2076714425091083e+01 3.3267852290115563e+01 0 0 0
564 1 10 1.4499999999999999e-01 2.9738036668794752e+01 4.2643540639360751e+01 3.4034406737219321e+01 0 0 0
565 1 10 1.4499999999999999e-01 2.9943075078082000e+01 4.3572688480672774e+01 3.1868913980845427e+01 0 0 0
669 1 16 2.9999999999999999e-02 2.8268704437347374e+01 4.5116448984392122e+01 3.3448386447005127e+01 0 0 0
668 1 15 1.4000000000000001e-01 2.7641766163738303e+01 4.5315245259447316e+01 3.4317597835017160e+01 0 0 0
670 1 16 2.9999999999999999e-02 2.6783394929270056e+01 4.4754537811620160e+01 3.3947589092207870e+01 0 0 0
671 1 17 -1.2000000000000000e-01 2.8160966553461364e+01 4.4641531489007008e+01 3.5523134518926739e+01 0 0 0
675 1 18 5.9999999999999998e-02 2.6023115060424079e+01 4.4128390869639780e+01 3.6159475455321243e+01 0 0 0
672 1 18 5.9999999999999998e-02 2.8296933686058903e+01 4.3606836665892288e+01 3.5208460786649070e+01 0 0 0
523 1 16 2.9999999999999999e-02 2.3558829394716966e+01 4.4281078837976565e+01 3.3682094058507637e+01 0 0 0
673 1 18 5.9999999999999998e-02 2.9091678898415037e+01 4.4973565368583529e+01 3.5983168374847516e+01 0 0 0
676 1 18 5.9999999999999998e-02 2.7356546486294839e+01 4.4203594906186723e+01 3.7355902908784394e+01 0 0 0
674 1 17 -1.2000000000000000e-01 2.6879447899508360e+01 4.4702926333305001e+01 3.6512608734134119e+01 0 0 0
665 1 13 1.1500000000000000e-01 2.3670288537334741e+01 4.7643835004358095e+01 3.2191433239553831e+01 0 0 0
664 1 13 1.1500000000000000e-01 2.5000732745854069e+01 4.6977488036949403e+01 3.4458074571918189e+01 0 0 0
658 1 11 -1.1500000000000000e-01 2.7652784683405081e+01 4.7784857795088932e+01 3.2455702448716742e+01 0 0 0
663 1 13 1.1500000000000000e-01 2.8695574161285844e+01 4.8060813475587729e+01 3.2508980654594914e+01 0 0 0
661 1 11 -1.1500000000000000e-01 2.4748405481896494e+01 4.7684641025664583e+01 3.2240409993978389e+01 0 0 0
660 1 11 -1.1500000000000000e-01 2.5441619985880390e+01 4.7276849257634488e+01 3.3518712394091182e+01 0 0 0
659 1 12 2.3499999999999999e-01 2.6881917166001855e+01 4.7296440300720555e+01 3.3534070052248637e+01 0 0 0
667 1 14 -2.8499999999999998e-01 2.7589120736395603e+01 4.6770740660980394e+01 3.4562367691618796e+01 0 0 0
490 1 18 5.9999999999999998e-02 1.7089120135587478e+01 4.3869186999873442e+01 3.5974366240986313e+01 0 0 0
486 1 15 1.4000000000000001e-01 1.8326305214763305e+01 4.2165815670215579e+01 3.6631081315342129e+01 0 0 0
482 1 13 1.1500000000000000e-01 1.7342119184086176e+01 3.9828400909667074e+01 3.8514748753338068e+01 0 0 0
485 1 14 -2.8499999999999998e-01 1.8661752492843608e+01 4.1837912490827179e+01 3.7895663029677976e+01 0 0 0
516 1 11 -1.1500000000000000e-01 2.1871493080347413e+01 3.8609536257377499e+01 3.5085609256975303e+01 0 0 0
511 1 11 -1.1500000000000000e-01 2.2636576217428299e+01 3.9483602895548600e+01 3.5884404246850082e+01 0 0 0
512 1 11 -1.1500000000000000e-01 2.2871331651661613e+01 4.0806829340404668e+01 3.5376747603938398e+01 0 0 0
481 1 13 1.1500000000000000e-01 2.1284778069874509e+01 4.1122007745747553e+01 3.7837977271250388e+01 0 0 0
520 1 13 1.1500000000000000e-01 2.1520768278964667e+01 3.7607565032821640e+01 3.5284218871186354e+01 0 0 0
469 1 6 1.3100000000000001e-01 2.3213228667742428e+01 3.9004956006469563e+01 3.7074244928317206e+01 0 0 0
464 1 6 1.3100000000000001e-01 2.2470387451204228e+01 3.9057342366008093e+01 3.8447369161722143e+01 0 0 0
479 1 11 -1.1500000000000000e-01 1.8812849355396555e+01 3.8219713231125851e+01 3.8985478126991119e+01 0 0 0
483 1 13 1.1500000000000000e-01 1.8372855051697830e+01 3.7406844159877956e+01 3.9544091486768039e+01 0 0 0
484 1 13 1.1500000000000000e-01 2.0751659273460834e+01 3.7138720665384916e+01 3.9276580590171079e+01 0 0 0
477 1 12 2.3499999999999999e-01 1.9204774932196113e+01 4.0557970940288435e+01 3.7902759085685545e+01 0 0 0
476 1 11 -1.1500000000000000e-01 2.0547045424878327e+01 4.0383851519871271e+01 3.8115962757754701e+01 0 0 0
478 1 11 -1.1500000000000000e-01 1.8368698605550978e+01 3.9497068640579542e+01 3.8567223689129264e+01 0 0 0
475 1 11 -1.1500000000000000e-01 2.1005360347604029e+01 3.9099737239995463e+01 3.8534058323135334e+01 0 0 0
480 1 11 -1.1500000000000000e-01 2.0249599709734149e+01 3.7991012011326511e+01 3.8843065127812892e+01 0 0 0
463 1 5 -2.9999999999999999e-01 2.3169397344748855e+01 3.8899144278197689e+01 3.9514895410950466e+01 0 0 0
468 1 5 -2.9999999999999999e-01 2.4494445705700976e+01 3.9193456677994327e+01 3.7235065775491854e+01 0 0 0
547 1 1 -1.1600000000000001e-01 2.6832602095735574e+01 4.0577335734904430e+01 3.5692452830300070e+01 0 0 0
470 1 7 -7.2999999999999995e-02 2.6602886200927358e+01 3.9416183611114803e+01 3.8226481610885955e+01 0 0 0
472 1 9 2.2900000000000001e-01 2.5190125029641525e+01 3.9392153989137924e+01 3.8362830318091390e+01 0 0 0
548 1 2 1.0800000000000000e-01 2.7321816854413896e+01 3.9449841671872392e+01 3.6960419227115693e+01 0 0 0
474 1 10 1.4499999999999999e-01 2.8444565079082285e+01 3.9243990689823505e+01 3.9200470057197656e+01 0 0 0
471 1 8 -1.6700000000000001e-01 2.7408911409527459e+01 3.9396019866908510e+01 3.9466380955907141e+01 0 0 0
467 1 9 2.2900000000000001e-01 2.4548917126264641e+01 3.9095088007075880e+01 3.9637409942318691e+01 0 0 0
465 1 7 -7.2999999999999995e-02 2.5281945312177953e+01 3.9004261725533198e+01 4.0808407352213699e+01 0 0 0
466 1 8 -1.6700000000000001e-01 2.6744534298656017e+01 3.9099404554099621e+01 4.0684204216689075e+01 0 0 0
491 1 18 5.9999999999999998e-02 1.6178113602894186e+01 4.2472978273285989e+01 3.6384589254808184e+01 0 0 0
489 1 17 -1.2000000000000000e-01 1.7006872123920299e+01 4.3089876967899009e+01 3.6732001471832639e+01 0 0 0
488 1 16 2.9999999999999999e-02 1.9126372032057930e+01 4.2613509513098748e+01 3.6041536029600465e+01 0 0 0
492 1 17 -1.2000000000000000e-01 1.6518255529178639e+01 4.3939653675461507e+01 3.7966437767104608e+01 0 0 0
494 1 18 5.9999999999999998e-02 1.7131275401637307e+01 4.4840901626038331e+01 3.7958771228484160e+01 0 0 0
495 1 17 -1.2000000000000000e-01 1.5168027605907664e+01 4.4673235570736537e+01 3.7846248886875088e+01 0 0 0
498 1 17 -1.2000000000000000e-01 1.4096179268211964e+01 4.3589507645938582e+01 3.7867550242191285e+01 0 0 0
502 1 18 5.9999999999999998e-02 1.2110032021564946e+01 4.2944022191601505e+01 3.8074161915706249e+01 0 0 0
503 1 18 5.9999999999999998e-02 1.2553757944710799e+01 4.4459557551975152e+01 3.8891298549469923e+01 0 0 0
501 1 17 -1.2000000000000000e-01 1.2627617803752171e+01 4.3896581793259138e+01 3.7960865868055457e+01 0 0 0
497 1 18 5.9999999999999998e-02 1.4986229974925733e+01 4.5280628177911026e+01 3.8732885595811879e+01 0 0 0
496 1 18 5.9999999999999998e-02 1.5077676040208653e+01 4.5378226692990943e+01 3.7019856612689559e+01 0 0 0
499 1 18 5.9999999999999998e-02 1.4291425050238047e+01 4.3045541325733389e+01 3.8791714707155023e+01 0 0 0
493 1 18 5.9999999999999998e-02 1.6680758563833365e+01 4.3261258640355884e+01 3.8803977610336403e+01 0 0 0
500 1 18 5.9999999999999998e-02 1.4282124960804920e+01 4.2991988180054634e+01 3.6975084647716727e+01 0 0 0
691 1 18 5.9999999999999998e-02 2.3039406245345258e+01 4.7336385933919324e+01 4.2012069859098133e+01 0 0 0
689 1 19 -1.7999999999999999e-01 2.3580303969058040e+01 4.7561214593616825e+01 4.1092840961719055e+01 0 0 0
690 1 18 5.9999999999999998e-02 2.4238389398181422e+01 4.8424803564751279e+01 4.1188962244932952e+01 0 0 0
487 1 16 2.9999999999999999e-02 1.8081339334983443e+01 4.1399864400773687e+01 3.5895275341348253e+01 0 0 0
517 1 13 1.1500000000000000e-01 2.3549837935938744e+01 4.1448745718374504e+01 3.5918939992201565e+01 0 0 0
685 1 18 5.9999999999999998e-02 2.4238866991301155e+01 4.7418471571456415e+01 3.8558617803756491e+01 0 0 0
681 1 18 5.9999999999999998e-02 2.5791417035413581e+01 4.4750278808898969e+01 3.8740694110876525e+01 0 0 0
692 1 18 5.9999999999999998e-02 2.2762159083957542e+01 4.7932095695014418e+01 4.0475438204912287e+01 0 0 0
686 1 17 -1.2000000000000000e-01 2.4151139313284137e+01 4.6272867214687324e+01 4.0447961980454565e+01 0 0 0
688 1 18 5.9999999999999998e-02 2.5016156559010440e+01 4.5913814995327591e+01 4.1005570281310582e+01 0 0 0
680 1 17 -1.2000000000000000e-01 2.5240705536650200e+01 4.5506724744170853e+01 3.8181581810485746e+01 0 0 0
683 1 17 -1.2000000000000000e-01 2.4764165770024505e+01 4.6627933366042640e+01 3.9094538141518711e+01 0 0 0
684 1 18 5.9999999999999998e-02 2.5767616511998320e+01 4.6927588091397418e+01 3.9396852153017448e+01 0 0 0
679 1 18 5.9999999999999998e-02 2.7090290554201449e+01 4.6387640585991427e+01 3.7675372316648669e+01 0 0 0
678 1 18 5.9999999999999998e-02 2.6257701467008978e+01 4.6809176585338690e+01 3.6390301502902389e+01 0 0 0
552 1 4 1.7399999999999999e-01 2.9380527820545094e+01 3.8752758367999078e+01 3.7441900585516002e+01 0 0 0
549 1 3 -2.2400000000000000e-01 2.8665901314445893e+01 3.9197764266824990e+01 3.6765381031629651e+01 0 0 0
551 1 2 1.0800000000000000e-01 2.8230009988323662e+01 4.0191526806346282e+01 3.4744241901837903e+01 0 0 0
550 1 3 -2.2400000000000000e-01 2.8984579981577379e+01 3.9301452602959216e+01 3.5424714416562090e+01 0 0 0
677 1 17 -1.2000000000000000e-01 2.6293162932108078e+01 4.5957187080448499e+01 3.7069239181433872e+01 0 0 0
553 1 4 1.7399999999999999e-01 3.0024229681121536e+01 3.9173164947532555e+01 3.5161901213501672e+01 0 0 0
506 1 18 5.9999999999999998e-02 1.2071296012974258e+01 4.3931662673728987e+01 3.5927899951308042e+01 0 0 0
504 1 17 -1.2000000000000000e-01 1.1992365861476348e+01 4.4659530410183784e+01 3.6735413803665281e+01 0 0 0
505 1 18 5.9999999999999998e-02 1.2650591915886885e+01 4.5513339770637543e+01 3.6574636499493188e+01 0 0 0
508 1 18 5.9999999999999998e-02 1.0603282059946855e+01 4.5828958016512750e+01 3.8036600715332540e+01 0 0 0
509 1 18 5.9999999999999998e-02 9.8971289565711498e+00 4.4400070358831400e+01 3.7503660913317454e+01 0 0 0
507 1 19 -1.7999999999999999e-01 1.0616320184268714e+01 4.5153120794406469e+01 3.7181513341728234e+01 0 0 0
510 1 18 5.9999999999999998e-02 1.0145196799953776e+01 4.5869247586311296e+01 3.6508233922127623e+01 0 0 0
687 1 18 5.9999999999999998e-02 2.3367743559671659e+01 4.5515668439424083e+01 4.0480228215084082e+01 0 0 0
375 1 8 -1.6700000000000001e-01 2.2043305641021210e+01 3.7744919432461245e+01 4.7654499464604179e+01 0 0 0
429 1 13 1.1500000000000000e-01 2.8094996496567674e+01 3.5627409400297779e+01 4.5752451885518553e+01 0 0 0
378 1 6 1.3100000000000001e-01 2.7193886701758220e+01 3.7448311115078866e+01 4.7715216110088313e+01 0 0 0
420 1 11 -1.1500000000000000e-01 2.8587986347322879e+01 3.7262984783346198e+01 4.7234987612945339e+01 0 0 0
376 1 9 2.2900000000000001e-01 2.4474648761598900e+01 3.7708425716527920e+01 4.8363405184876825e+01 0 0 0
373 1 6 1.3100000000000001e-01 2.6668919450718725e+01 3.7129024589220109e+01 4.9055532448395383e+01 0 0 0
381 1 9 2.2900000000000001e-01 2.4927712499631340e+01 3.7681404025501074e+01 4.6967410436705549e+01 0 0 0
425 1 11 -1.1500000000000000e-01 2.8890424394860876e+01 3.6190391938984718e+01 4.6218010818147349e+01 0 0 0
428 1 13 1.1500000000000000e-01 3.0284529224340581e+01 3.5546804578730061e+01 4.4788451038361650e+01 0 0 0
424 1 11 -1.1500000000000000e-01 3.0173715523926539e+01 3.6146542441197766e+01 4.5679761769881928e+01 0 0 0
423 1 11 -1.1500000000000000e-01 3.1220415945437800e+01 3.6720711127938813e+01 4.6330063358719300e+01 0 0 0
461 1 4 1.7399999999999999e-01 2.3229164262631230e+01 3.6063156848147671e+01 4.3701690003756831e+01 0 0 0
462 1 4 1.7399999999999999e-01 2.3761091335588489e+01 3.6843375565272758e+01 4.1147864619155193e+01 0 0 0
459 1 3 -2.2400000000000000e-01 2.3887423016280700e+01 3.7368967166950107e+01 4.2082847920984541e+01 0 0 0
458 1 3 -2.2400000000000000e-01 2.3731701527931946e+01 3.7000019239340091e+01 4.3511571206807950e+01 0 0 0
383 1 10 1.4499999999999999e-01 2.1762054913892793e+01 3.8056896695726472e+01 4.5587326749450810e+01 0 0 0
380 1 8 -1.6700000000000001e-01 2.2551881207524428e+01 3.7883114971269805e+01 4.6303130031179094e+01 0 0 0
456 1 1 -1.1600000000000001e-01 2.5046796062460526e+01 3.9077868252890944e+01 4.3604912945890511e+01 0 0 0
460 1 2 1.0800000000000000e-01 2.4671479527711263e+01 3.8467391327513631e+01 4.2065222910205001e+01 0 0 0
457 1 2 1.0800000000000000e-01 2.4310564427197008e+01 3.7884567005093636e+01 4.4433399434332124e+01 0 0 0
473 1 10 1.4499999999999999e-01 2.7341364215773925e+01 3.8719518726488019e+01 4.1500219417535774e+01 0 0 0
379 1 7 -7.2999999999999995e-02 2.3967464434530960e+01 3.7797703676013931e+01 4.5861097759157104e+01 0 0 0
377 1 5 -2.9999999999999999e-01 2.6335753126947264e+01 3.7800884594393217e+01 4.6729020528295585e+01 0 0 0
427 1 13 1.1500000000000000e-01 3.2245615732376720e+01 3.6470557424952062e+01 4.6100305830567571e+01 0 0 0
421 1 11 -1.1500000000000000e-01 2.9708202461533094e+01 3.7980267620437701e+01 4.7805124950136737e+01 0 0 0
422 1 12 2.3499999999999999e-01 3.0980286528497878e+01 3.7571863130727472e+01 4.7413428304056929e+01 0 0 0
430 1 14 -2.8499999999999998e-01 3.1929670023961187e+01 3.8230433156046963e+01 4.8234966019503801e+01 0 0 0
426 1 13 1.1500000000000000e-01 2.9569254853617995e+01 3.8743450290854035e+01 4.8556554104369447e+01 0 0 0
432 1 16 2.9999999999999999e-02 3.3789124522988956e+01 3.7136290857712545e+01 4.8735836086661230e+01 0 0 0
433 1 16 2.9999999999999999e-02 3.3564627108900815e+01 3.7709428805425212e+01 4.7233163832661738e+01 0 0 0
442 1 18 5.9999999999999998e-02 3.6026133052693744e+01 4.0861015870311192e+01 5.0324414431645735e+01 0 0 0
431 1 15 1.4000000000000001e-01 3.3247770785207038e+01 3.7947248970594210e+01 4.8248616264206042e+01 0 0 0
436 1 18 5.9999999999999998e-02 3.3627080070268534e+01 4.0049815144998327e+01 4.7813449907044074e+01 0 0 0
434 1 17 -1.2000000000000000e-01 3.3950851060019254e+01 3.9248609346174732e+01 4.8477785977440853e+01 0 0 0
440 1 17 -1.2000000000000000e-01 3.4937803745767788e+01 4.0861058141839422e+01 5.0264074394481014e+01 0 0 0
437 1 17 -1.2000000000000000e-01 3.4279371334377387e+01 3.9552249695440224e+01 4.9995416074340540e+01 0 0 0
438 1 18 5.9999999999999998e-02 3.3357288382139458e+01 3.9404790791379398e+01 5.0557660595961138e+01 0 0 0
435 1 18 5.9999999999999998e-02 3.4984019024787180e+01 3.9068251430211411e+01 4.8180910441110584e+01 0 0 0
441 1 18 5.9999999999999998e-02 3.4490610818527095e+01 4.1539319707543413e+01 4.9537383421152157e+01 0 0 0
439 1 18 5.9999999999999998e-02 3.4989866415762719e+01 3.8797909937326104e+01 5.0333452328400334e+01 0 0 0
320 1 18 5.9999999999999998e-02 1.5526669843523047e+01 2.4284207836719755e+01 5.3499194296672755e+01 0 0 0
326 1 18 5.9999999999999998e-02 1.7802348203478026e+01 2.2939224839958928e+01 5.0628121972131574e+01 0 0 0
322 1 17 -1.2000000000000000e-01 1.6874101815016374e+01 2.4557364762899596e+01 5.1865318868535233e+01 0 0 0
323 1 18 5.9999999999999998e-02 1.7254646993675514e+01 2.5342219367123221e+01 5.1211644838041380e+01 0 0 0
319 1 17 -1.2000000000000000e-01 1.5723409308917320e+01 2.4992897994752301e+01 5.2694736774055421e+01 0 0 0
321 1 18 5.9999999999999998e-02 1.4852831675184470e+01 2.5144723623924055e+01 5.2056658330792153e+01 0 0 0
308 1 18 5.9999999999999998e-02 1.3490906493160690e+01 2.8872237749069921e+01 5.6141333988887780e+01 0 0 0
315 1 18 5.9999999999999998e-02 1.5847164259184680e+01 2.5764389229300910e+01 5.5435197313652530e+01 0 0 0
314 1 18 5.9999999999999998e-02 1.4220781460490800e+01 2.6047610026847771e+01 5.4678463871380025e+01 0 0 0
396 1 16 2.9999999999999999e-02 2.6413254415406296e+01 3.0852568511896806e+01 5.1069305541639622e+01 0 0 0
402 1 18 5.9999999999999998e-02 2.7572978594935488e+01 2.9756374132412617e+01 5.2914749249708201e+01 0 0 0
337 1 13 1.1500000000000000e-01 1.4576710295644315e+01 3.5844156794928004e+01 5.2610207718078534e+01 0 0 0
333 1 11 -1.1500000000000000e-01 1.5377166460046192e+01 3.6188566894125600e+01 5.3248213683914067e+01 0 0 0
336 1 13 1.1500000000000000e-01 1.5174593724000070e+01 3.8414974590551395e+01 5.3474587219662133e+01 0 0 0
332 1 11 -1.1500000000000000e-01 1.5601760033548539e+01 3.7472586581878971e+01 5.3784157543009130e+01 0 0 0
338 1 13 1.1500000000000000e-01 1.5991099988460817e+01 3.4227439765508493e+01 5.2917632956005640e+01 0 0 0
334 1 11 -1.1500000000000000e-01 1.6351262996812750e+01 3.5123832050554846e+01 5.3400502999313630e+01 0 0 0
329 1 11 -1.1500000000000000e-01 1.7488362474357807e+01 3.5453945103403250e+01 5.4096953362341154e+01 0 0 0
331 1 12 2.3499999999999999e-01 1.6600147234602208e+01 3.7832894392977323e+01 5.4709660176301384e+01 0 0 0
365 1 1 -1.1600000000000001e-01 2.2896855051703277e+01 3.5490495582416372e+01 5.0782717039067116e+01 0 0 0
382 1 10 1.4499999999999999e-01 2.1033984800322109e+01 3.7463540144999605e+01 4.7916219041858220e+01 0 0 0
330 1 11 -1.1500000000000000e-01 1.7627914139172248e+01 3.6790141014256662e+01 5.4691740309498741e+01 0 0 0
287 1 6 1.3100000000000001e-01 1.8710146331779999e+01 3.4494388581050316e+01 5.4139702320450844e+01 0 0 0
286 1 5 -2.9999999999999999e-01 1.9758895699888090e+01 3.4727023617374471e+01 5.3318841184935202e+01 0 0 0
290 1 9 2.2900000000000001e-01 2.1040740914053174e+01 3.4332775599528070e+01 5.3755430012485107e+01 0 0 0
390 1 13 1.1500000000000000e-01 2.6439569012661259e+01 3.4625244795529149e+01 4.9261977815570006e+01 0 0 0
366 1 2 1.0800000000000000e-01 2.2215897786730693e+01 3.5939228827655832e+01 5.2158763507277200e+01 0 0 0
367 1 3 -2.2400000000000000e-01 2.1959261963788105e+01 3.7277753160792194e+01 5.2259849909849045e+01 0 0 0
400 1 18 5.9999999999999998e-02 2.6043866327563599e+01 3.2155486228494077e+01 5.3210042197257380e+01 0 0 0
374 1 7 -7.2999999999999995e-02 2.3054851504786903e+01 3.7517061631708174e+01 4.8661403470342293e+01 0 0 0
369 1 2 1.0800000000000000e-01 2.2602749815980175e+01 3.7104148808088802e+01 5.0072630645664503e+01 0 0 0
368 1 3 -2.2400000000000000e-01 2.2184143530752728e+01 3.7938699351227257e+01 5.1050818542032758e+01 0 0 0
372 1 5 -2.9999999999999999e-01 2.5335365868700976e+01 3.7462823560479265e+01 4.9398089076585407e+01 0 0 0
370 1 4 1.7399999999999999e-01 2.1717818986568716e+01 3.7668543228750465e+01 5.3237289632561712e+01 0 0 0
395 1 15 1.4000000000000001e-01 2.6789532002016411e+01 3.1838645840366667e+01 5.1341641144354178e+01 0 0 0
397 1 16 2.9999999999999999e-02 2.5785578681055462e+01 3.2227034531073514e+01 5.1170375403616369e+01 0 0 0
398 1 17 -1.2000000000000000e-01 2.7051383366901508e+01 3.1972410476918764e+01 5.2836554732711981e+01 0 0 0
399 1 18 5.9999999999999998e-02 2.7646795703015734e+01 3.2837131991370029e+01 5.3129542402275696e+01 0 0 0
385 1 11 -1.1500000000000000e-01 2.7222083824023471e+01 3.4927076802466104e+01 4.9942395341495939e+01 0 0 0
384 1 11 -1.1500000000000000e-01 2.7444953873915932e+01 3.6381284211645678e+01 5.0063268367566579e+01 0 0 0
371 1 4 1.7399999999999999e-01 2.2200381869881259e+01 3.9018470412635118e+01 5.1066009700266065e+01 0 0 0
288 1 7 -7.2999999999999995e-02 2.2299227537788518e+01 3.4871717928370046e+01 5.3262725195170056e+01 0 0 0
289 1 8 -1.6700000000000001e-01 2.3549394380758137e+01 3.4363130417199550e+01 5.3641161004039724e+01 0 0 0
292 1 10 1.4499999999999999e-01 2.4427726731738023e+01 3.4856152576971908e+01 5.3251466981509829e+01 0 0 0
401 1 17 -1.2000000000000000e-01 2.7866324579545793e+01 3.0736572140093326e+01 5.3290595226485543e+01 0 0 0
394 1 14 -2.8499999999999998e-01 2.7688910604330793e+01 3.2414195435205215e+01 5.0521964815397453e+01 0 0 0
386 1 12 2.3499999999999999e-01 2.7978368649992632e+01 3.3838845150120541e+01 5.0613186229337309e+01 0 0 0
403 1 18 5.9999999999999998e-02 2.8945218118564810e+01 3.0863741340983140e+01 5.3201619211668017e+01 0 0 0
387 1 11 -1.1500000000000000e-01 2.8964016413907153e+01 3.4421357793132422e+01 5.1455894538753832e+01 0 0 0
391 1 13 1.1500000000000000e-01 2.9721086082167378e+01 3.3787740722723342e+01 5.1893815679470464e+01 0 0 0
389 1 11 -1.1500000000000000e-01 2.8466676921769832e+01 3.6681566611020706e+01 5.0974219516050951e+01 0 0 0
388 1 11 -1.1500000000000000e-01 2.9166173231705702e+01 3.5684462809947640e+01 5.1704802950568478e+01 0 0 0
392 1 13 1.1500000000000000e-01 2.9887596593761799e+01 3.5931063197912998e+01 5.2469745158408394e+01 0 0 0
348 1 18 5.9999999999999998e-02 1.9328472177987994e+01 3.9233915796265990e+01 5.3276333444577588e+01 0 0 0
453 1 18 5.9999999999999998e-02 3.6988662938865552e+01 4.3001488524022164e+01 5.4561038596537742e+01 0 0 0
393 1 13 1.1500000000000000e-01 2.8900167203925143e+01 3.7650389925801349e+01 5.1173888141564227e+01 0 0 0
445 1 18 5.9999999999999998e-02 3.4783835831623492e+01 4.2672593935338661e+01 5.1446950883510283e+01 0 0 0
447 1 18 5.9999999999999998e-02 3.6423780502965116e+01 4.1310260863463611e+01 5.2762628856019774e+01 0 0 0
451 1 18 5.9999999999999998e-02 3.4744551529431220e+01 4.3416682962861522e+01 5.3686039070754155e+01 0 0 0
444 1 18 5.9999999999999998e-02 3.3473606084922565e+01 4.1589119792927022e+01 5.1651540314828225e+01 0 0 0
452 1 19 -1.7999999999999999e-01 3.6100913853643242e+01 4.2856227585057475e+01 5.5176587799965716e+01 0 0 0
449 1 17 -1.2000000000000000e-01 3.5032532586447914e+01 4.2462742257962674e+01 5.4127812814501873e+01 0 0 0
450 1 18 5.9999999999999998e-02 3.4108595480324105e+01 4.2080688394555850e+01 5.4561949971119759e+01 0 0 0
446 1 17 -1.2000000000000000e-01 3.5365994485448041e+01 4.1541525282846422e+01 5.2887950565247074e+01 0 0 0
443 1 17 -1.2000000000000000e-01 3.4559389253626591e+01 4.1611799235228489e+01 5.1558478171550590e+01 0 0 0
448 1 18 5.9999999999999998e-02 3.5254267041541098e+01 4.0486130550024235e+01 5.3136463761415285e+01 0 0 0
454 1 18 5.9999999999999998e-02 3.6078092325233449e+01 4.3799618019799240e+01 5.5722109353262496e+01 0 0 0
455 1 18 5.9999999999999998e-02 3.6353259173610866e+01 4.1946466018898334e+01 5.5721340709714980e+01 0 0 0
327 1 18 5.9999999999999998e-02 1.6081453058619548e+01 2.3369507851160098e+01 5.0599767352659583e+01 0 0 0
324 1 18 5.9999999999999998e-02 1.7793652456036710e+01 2.4587064686397785e+01 5.2449822391828967e+01 0 0 0
317 1 18 5.9999999999999998e-02 1.6901015942528790e+01 2.6629392678455734e+01 5.3875570078015635e+01 0 0 0
318 1 18 5.9999999999999998e-02 1.5636944826323255e+01 2.7066385136944056e+01 5.2780276667525570e+01 0 0 0
316 1 17 -1.2000000000000000e-01 1.5937402094288357e+01 2.6295951615826798e+01 5.3490387658968174e+01 0 0 0
325 1 19 -1.7999999999999999e-01 1.6947603809397847e+01 2.3218700484303945e+01 5.1244080952799777e+01 0 0 0
328 1 18 5.9999999999999998e-02 1.6661260010470542e+01 2.2418332276011135e+01 5.1926369718977263e+01 0 0 0
233 1 18 5.9999999999999998e-02 9.6678180114490999e+00 3.1884207708545443e+01 6.3732227672489600e+01 0 0 0
232 1 18 5.9999999999999998e-02 9.7695876086797675e+00 3.3296360480187644e+01 6.2546479080494372e+01 0 0 0
310 1 17 -1.2000000000000000e-01 1.5341030007079333e+01 2.7836297355915313e+01 5.5638904207516362e+01 0 0 0
311 1 18 5.9999999999999998e-02 1.6308398325102424e+01 2.8287119537876755e+01 5.5417414027999676e+01 0 0 0
307 1 17 -1.2000000000000000e-01 1.4095542538834783e+01 2.8802024308286679e+01 5.5237129600456086e+01 0 0 0
309 1 18 5.9999999999999998e-02 1.3414703811308097e+01 2.8424035742102433e+01 5.4474447939076562e+01 0 0 0
313 1 17 -1.2000000000000000e-01 1.5237745468155419e+01 2.6417118636561199e+01 5.4810174492968194e+01 0 0 0
305 1 16 2.9999999999999999e-02 1.5648063273796675e+01 2.9976362068620670e+01 5.4349752923712089e+01 0 0 0
304 1 15 1.4000000000000001e-01 1.4671406811629600e+01 3.0156117661043012e+01 5.4799120366408815e+01 0 0 0
166 1 18 5.9999999999999998e-02 1.8387450893665712e+01 2.7640309853822124e+01 6.0337870216693481e+01 0 0 0
306 1 16 2.9999999999999999e-02 1.3980751075696180e+01 3.0778082061209144e+01 5.4229686257977285e+01 0 0 0
312 1 18 5.9999999999999998e-02 1.5311768218625859e+01 2.7692776448048679e+01 5.6719017883177358e+01 0 0 0
303 1 14 -2.8499999999999998e-01 1.4657715208077724e+01 3.0817508457381670e+01 5.6056112691152876e+01 0 0 0
165 1 18 5.9999999999999998e-02 1.8420028591050276e+01 2.9296588085605826e+01 6.0377927890492714e+01 0 0 0
164 1 17 -1.2000000000000000e-01 1.7719029784514998e+01 2.8486275322643571e+01 6.0177693286460467e+01 0 0 0
161 1 17 -1.2000000000000000e-01 1.6411879574775114e+01 2.8528622793866912e+01 6.0944497479596215e+01 0 0 0
162 1 18 5.9999999999999998e-02 1.5637438175600037e+01 2.9015385208067325e+01 6.0351705060439912e+01 0 0 0
300 1 13 1.1500000000000000e-01 1.4423495256778757e+01 3.2563834953650939e+01 5.7927262233587847e+01 0 0 0
296 1 11 -1.1500000000000000e-01 1.5446852971947356e+01 3.2441987538356251e+01 5.7604319213550404e+01 0 0 0
163 1 18 5.9999999999999998e-02 1.6392250167190785e+01 2.9310123802279868e+01 6.1704083478538237e+01 0 0 0
227 1 18 5.9999999999999998e-02 1.0276402048462170e+01 3.3342961440299263e+01 6.5744889320863408e+01 0 0 0
226 1 18 5.9999999999999998e-02 9.5581339747279390e+00 3.4955557347945827e+01 6.6013705687498359e+01 0 0 0
225 1 17 -1.2000000000000000e-01 1.0011501295243908e+01 3.4291503804174305e+01 6.5277775857755728e+01 0 0 0
224 1 18 5.9999999999999998e-02 1.1034659170738117e+01 3.5856597723941285e+01 6.4155669669332539e+01 0 0 0
175 1 18 5.9999999999999998e-02 1.8236890343926031e+01 2.8665959096882958e+01 5.6250793236306350e+01 0 0 0
172 1 18 5.9999999999999998e-02 1.8911173156965717e+01 3.0184856566854258e+01 5.8047394993897413e+01 0 0 0
174 1 18 5.9999999999999998e-02 1.9515549340585949e+01 2.9665779989706849e+01 5.6004340943140775e+01 0 0 0
173 1 17 -1.2000000000000000e-01 1.9240155987498589e+01 2.8827953647512295e+01 5.6644894288220719e+01 0 0 0
170 1 17 -1.2000000000000000e-01 1.8948541194159112e+01 2.9097624296488039e+01 5.8115436991777038e+01 0 0 0
299 1 13 1.1500000000000000e-01 1.6920068953371796e+01 3.1560210655932707e+01 5.4757695166480154e+01 0 0 0
169 1 18 5.9999999999999998e-02 1.7638566153588151e+01 2.7540318666666526e+01 5.8352697642129890e+01 0 0 0
168 1 18 5.9999999999999998e-02 1.6788195481544019e+01 2.8938994846008036e+01 5.8048245698882610e+01 0 0 0
167 1 17 -1.2000000000000000e-01 1.7644997845073775e+01 2.8595053894553679e+01 5.8627638243086714e+01 0 0 0
295 1 12 2.3499999999999999e-01 1.5613677398573758e+01 3.1759416776875682e+01 5.6431919191213083e+01 0 0 0
294 1 11 -1.1500000000000000e-01 1.6742339316689961e+01 3.2072286333493764e+01 5.5691820787954761e+01 0 0 0
274 1 1 -1.1600000000000001e-01 2.1515564683450414e+01 3.2017165114870487e+01 5.7859363240338226e+01 0 0 0
171 1 18 5.9999999999999998e-02 1.9790862020712005e+01 2.8788793916086579e+01 5.8734483941803944e+01 0 0 0
275 1 2 1.0800000000000000e-01 2.2348214289750366e+01 3.0748603195196573e+01 5.8718907861903418e+01 0 0 0
405 1 18 5.9999999999999998e-02 2.6873282502548822e+01 2.9930443721961222e+01 5.4749370593642588e+01 0 0 0
404 1 17 -1.2000000000000000e-01 2.7746769722033982e+01 3.0582320205539624e+01 5.4762681554200135e+01 0 0 0
411 1 18 5.9999999999999998e-02 2.8441361701249171e+01 3.0545640840198921e+01 5.7829247488382350e+01 0 0 0
407 1 17 -1.2000000000000000e-01 2.8789825958740536e+01 3.0093961065614543e+01 5.5668933025493473e+01 0 0 0
409 1 18 5.9999999999999998e-02 2.9094956369013904e+01 2.9125809885702303e+01 5.5271845313357602e+01 0 0 0
412 1 18 5.9999999999999998e-02 2.7217261527761575e+01 2.9857723570773611e+01 5.6954064442918117e+01 0 0 0
410 1 17 -1.2000000000000000e-01 2.8297414780789879e+01 2.9773465006234808e+01 5.7073520178275579e+01 0 0 0
415 1 18 5.9999999999999998e-02 2.8736941149439293e+01 2.7526845564683427e+01 5.7070916882947841e+01 0 0 0
341 1 16 2.9999999999999999e-02 1.7950896299078192e+01 4.0373230585801593e+01 5.5917321164415448e+01 0 0 0
301 1 13 1.1500000000000000e-01 1.6323323934377697e+01 3.3962279829970740e+01 5.9005421295956921e+01 0 0 0
217 1 18 5.9999999999999998e-02 1.4228231994209256e+01 3.6299500855250422e+01 6.5091641784055412e+01 0 0 0
339 1 14 -2.8499999999999998e-01 1.6632855277366154e+01 3.9096844125274728e+01 5.5390358504461162e+01 0 0 0
342 1 16 2.9999999999999999e-02 1.8650529550722446e+01 3.9008237448323570e+01 5.5239650248886520e+01 0 0 0
340 1 15 1.4000000000000001e-01 1.7860716064946097e+01 3.9732464107145965e+01 5.5040174947540656e+01 0 0 0
335 1 13 1.1500000000000000e-01 1.8610476744146460e+01 3.6677525594262647e+01 5.5125662531199659e+01 0 0 0
297 1 11 -1.1500000000000000e-01 1.6464185298111524e+01 3.3309466606521852e+01 5.8156661629445068e+01 0 0 0
298 1 11 -1.1500000000000000e-01 1.7576815870975210e+01 3.3598237122404925e+01 5.7403720472265142e+01 0 0 0
293 1 11 -1.1500000000000000e-01 1.7704910255915635e+01 3.3089604072612907e+01 5.6098771067699211e+01 0 0 0
302 1 13 1.1500000000000000e-01 1.8493374524538915e+01 3.3940593495698465e+01 5.7861008508674118e+01 0 0 0
282 1 6 1.3100000000000001e-01 1.8858109547508402e+01 3.3522362541090487e+01 5.5192974134006249e+01 0 0 0
249 1 15 1.4000000000000001e-01 2.0954445670661428e+01 3.7241826668245132e+01 5.7663827523464739e+01 0 0 0
250 1 16 2.9999999999999999e-02 2.0422671928382769e+01 3.7266022874651100e+01 5.6712653772944520e+01 0 0 0
248 1 14 -2.8499999999999998e-01 2.0160150032311101e+01 3.6232407204478818e+01 5.8362178430201595e+01 0 0 0
281 1 5 -2.9999999999999999e-01 2.0003023486317563e+01 3.2961794037014883e+01 5.5491717916807104e+01 0 0 0
285 1 9 2.2900000000000001e-01 2.1104580882788714e+01 3.3386563620370204e+01 5.4877324560856060e+01 0 0 0
252 1 17 -1.2000000000000000e-01 2.2448544367371934e+01 3.6740438431008805e+01 5.7502156592619251e+01 0 0 0
254 1 18 5.9999999999999998e-02 2.2543755580217599e+01 3.5726161925965890e+01 5.7114499286568382e+01 0 0 0
253 1 18 5.9999999999999998e-02 2.3018243228714610e+01 3.6927000348340862e+01 5.8412506997502412e+01 0 0 0
244 1 13 1.1500000000000000e-01 1.9642537324583817e+01 3.4096294419614267e+01 5.9495840300050595e+01 0 0 0
239 1 11 -1.1500000000000000e-01 2.0007693623809324e+01 3.4811193829498215e+01 6.0218321933646585e+01 0 0 0
240 1 12 2.3499999999999999e-01 2.0275274518120945e+01 3.6089541799542921e+01 5.9692716210107683e+01 0 0 0
241 1 11 -1.1500000000000000e-01 2.0876392991289428e+01 3.6954332783410877e+01 6.0558011235180821e+01 0 0 0
406 1 18 5.9999999999999998e-02 2.7585492144869946e+01 3.1606529162333164e+01 5.5098963511124879e+01 0 0 0
414 1 18 5.9999999999999998e-02 2.8835588111178833e+01 2.8264508648254857e+01 5.8592886768632980e+01 0 0 0
277 1 3 -2.2400000000000000e-01 2.3490282546025757e+01 3.0962052917235624e+01 5.6752593229380835e+01 0 0 0
280 1 4 1.7399999999999999e-01 2.4247711847687256e+01 3.0594185604139213e+01 5.6076298550309794e+01 0 0 0
276 1 3 -2.2400000000000000e-01 2.3134054766917437e+01 3.0117846016955617e+01 5.7839432743787704e+01 0 0 0
278 1 2 1.0800000000000000e-01 2.2499046340902694e+01 3.1880944140591520e+01 5.6378144756690162e+01 0 0 0
283 1 7 -7.2999999999999995e-02 2.2437021068089770e+01 3.2861784741320960e+01 5.5339663570925907e+01 0 0 0
284 1 8 -1.6700000000000001e-01 2.3540392418850583e+01 3.3375062206671252e+01 5.4695987948062104e+01 0 0 0
291 1 10 1.4499999999999999e-01 2.4506880604030421e+01 3.3073734375958530e+01 5.5072155631875781e+01 0 0 0
256 1 18 5.9999999999999998e-02 2.2565888673744876e+01 3.7378127193151691e+01 5.5497431780762085e+01 0 0 0
255 1 17 -1.2000000000000000e-01 2.3028488379457723e+01 3.7540329542155277e+01 5.6470977959227795e+01 0 0 0
259 1 18 5.9999999999999998e-02 2.4802787035464060e+01 3.6439412163063011e+01 5.6624794595038551e+01 0 0 0
408 1 18 5.9999999999999998e-02 2.9702837732672300e+01 3.0662144564567935e+01 5.5846913576875515e+01 0 0 0
418 1 18 5.9999999999999998e-02 3.1134134180052165e+01 2.7720750253833042e+01 5.8157432455372103e+01 0 0 0
419 1 18 5.9999999999999998e-02 3.0876641649247620e+01 2.9487135056928128e+01 5.8354360985394557e+01 0 0 0
416 1 19 -1.7999999999999999e-01 3.0649510305229448e+01 2.8608377501875538e+01 5.7750790555569878e+01 0 0 0
417 1 18 5.9999999999999998e-02 3.0719204787999036e+01 2.8765311847558667e+01 5.6674401027814994e+01 0 0 0
413 1 17 -1.2000000000000000e-01 2.9101752604797603e+01 2.8435513389344230e+01 5.7549807698678379e+01 0 0 0
360 1 18 5.9999999999999998e-02 1.8166895482670153e+01 3.8920705178706221e+01 4.9001309768697354e+01 0 0 0
343 1 17 -1.2000000000000000e-01 1.8177177242967648e+01 4.0686155884759202e+01 5.3817175998823870e+01 0 0 0
350 1 18 5.9999999999999998e-02 1.8711173304841115e+01 3.9134613726772592e+01 5.0923793075971815e+01 0 0 0
345 1 18 5.9999999999999998e-02 1.8396374030685688e+01 4.1729728159849223e+01 5.4043029341576471e+01 0 0 0
344 1 18 5.9999999999999998e-02 1.7212863492686814e+01 4.0521990776739990e+01 5.3336292213622713e+01 0 0 0
347 1 18 5.9999999999999998e-02 2.0229793964529069e+01 4.0732640129279325e+01 5.3173131350369339e+01 0 0 0
358 1 17 -1.2000000000000000e-01 1.7213465974181865e+01 3.9447040920510233e+01 4.8956111507009155e+01 0 0 0
357 1 18 5.9999999999999998e-02 1.6620178644390201e+01 4.1365818008414294e+01 4.9077180235543672e+01 0 0 0
355 1 17 -1.2000000000000000e-01 1.7557425502984540e+01 4.0865942551423636e+01 4.9321706526716085e+01 0 0 0
356 1 18 5.9999999999999998e-02 1.8344294810755773e+01 4.1123680886517569e+01 4.8612828791382775e+01 0 0 0
359 1 18 5.9999999999999998e-02 1.6558217978144555e+01 3.8833794400696938e+01 4.9574721939964803e+01 0 0 0
353 1 18 5.9999999999999998e-02 1.8277951712633516e+01 4.2094667512636818e+01 5.1111613096093670e+01 0 0 0
352 1 17 -1.2000000000000000e-01 1.7958201290952498e+01 4.1116875309660202e+01 5.0751356338828536e+01 0 0 0
351 1 18 5.9999999999999998e-02 1.9930691239688880e+01 4.0353862653781981e+01 5.0752064790648895e+01 0 0 0
354 1 18 5.9999999999999998e-02 1.7004120241302022e+01 4.0824283666545575e+01 5.1189784778526828e+01 0 0 0
349 1 17 -1.2000000000000000e-01 1.9050446968886444e+01 4.0084930970092650e+01 5.1335970852733311e+01 0 0 0
346 1 17 -1.2000000000000000e-01 1.9291259660989105e+01 4.0253888886294412e+01 5.2893749949087500e+01 0 0 0
260 1 18 5.9999999999999998e-02 2.5094866750326005e+01 3.7626830221594034e+01 5.7351780813507652e+01 0 0 0
251 1 16 2.9999999999999999e-02 2.1060345957643545e+01 3.8149098713873563e+01 5.8258590400013617e+01 0 0 0
245 1 13 1.1500000000000000e-01 2.1529578915827074e+01 3.7691879873065105e+01 6.0115549441882820e+01 0 0 0
263 1 18 5.9999999999999998e-02 2.4669731412578379e+01 3.7801993636087445e+01 5.4298706148231204e+01 0 0 0
261 1 17 -1.2000000000000000e-01 2.5130219264638171e+01 3.8266764671126758e+01 5.5170508219271142e+01 0 0 0
258 1 17 -1.2000000000000000e-01 2.4571520519173340e+01 3.7482022488946136e+01 5.6406667322044299e+01 0 0 0
266 1 18 5.9999999999999998e-02 2.7038891976075927e+01 3.8823333081383240e+01 5.5741138998374751e+01 0 0 0
268 1 18 5.9999999999999998e-02 2.6704215861589155e+01 3.9985688082701131e+01 5.3700001091470362e+01 0 0 0
273 1 18 5.9999999999999998e-02 2.9136653288645153e+01 3.9777417435413071e+01 5.3922595381366492e+01 0 0 0
269 1 18 5.9999999999999998e-02 2.6470061582175841e+01 3.8659609256662449e+01 5.2716229867829945e+01 0 0 0
267 1 17 -1.2000000000000000e-01 2.7100811943074092e+01 3.8982373780916738e+01 5.3544527743278529e+01 0 0 0
264 1 17 -1.2000000000000000e-01 2.6596156607222895e+01 3.8283746839814050e+01 5.4903922115866600e+01 0 0 0
272 1 18 5.9999999999999998e-02 2.8867620057534197e+01 3.9249332435699095e+01 5.2283566287238550e+01 0 0 0
262 1 18 5.9999999999999998e-02 2.4876112489965600e+01 3.9320933542450760e+01 5.5059793550025866e+01 0 0 0
257 1 18 5.9999999999999998e-02 2.2743185023450032e+01 3.8582698011775051e+01 5.6612998786744207e+01 0 0 0
364 1 18 5.9999999999999998e-02 1.6702745029489360e+01 3.8461945474496339e+01 4.6870550167609565e+01 0 0 0
362 1 18 5.9999999999999998e-02 1.5810099923852301e+01 3.9851143620599963e+01 4.7300231758800869e+01 0 0 0
361 1 19 -1.7999999999999999e-01 1.6767643120400813e+01 3.9362705293036171e+01 4.7480894481126143e+01 0 0 0
363 1 18 5.9999999999999998e-02 1.7310949318288706e+01 3.9973038090709956e+01 4.6759498444630161e+01 0 0 0
140 1 17 -1.2000000000000000e-01 1.0896743373240609e+01 2.1522073913808882e+01 7.6083586861505538e+01 0 0 0
142 1 18 5.9999999999999998e-02 1.1667131891771005e+01 2.1916671549958444e+01 7.6746078166473950e+01 0 0 0
145 1 18 5.9999999999999998e-02 9.6805512007483578e+00 2.3392051967171504e+01 7.6017339195860430e+01 0 0 0
143 1 19 -1.7999999999999999e-01 9.6003348620628444e+00 2.2344585727521469e+01 7.6307993954860208e+01 0 0 0
146 1 18 5.9999999999999998e-02 9.3411137462542158e+00 2.2163906739963281e+01 7.7351190645720038e+01 0 0 0
133 1 18 5.9999999999999998e-02 1.2435535058376837e+01 2.3153264695246691e+01 7.2406789740397102e+01 0 0 0
135 1 18 5.9999999999999998e-02 1.1173010585459160e+01 2.4042700143463460e+01 7.4597945162063937e+01 0 0 0
134 1 17 -1.2000000000000000e-01 1.1952429237723170e+01 2.3280958315788364e+01 7.4579079438434178e+01 0 0 0
132 1 18 5.9999999999999998e-02 1.3881064862093492e+01 2.3384131382865341e+01 7.3325858094772357e+01 0 0 0
131 1 17 -1.2000000000000000e-01 1.2814514391819754e+01 2.3608968289587992e+01 7.3321562385142727e+01 0 0 0
136 1 18 5.9999999999999998e-02 1.2454319026426552e+01 2.3582180655704956e+01 7.5498574811947506e+01 0 0 0
150 1 11 -1.1500000000000000e-01 1.2803816578611505e+01 2.6173602923816102e+01 6.3169657778280616e+01 0 0 0
159 1 16 2.9999999999999999e-02 1.6526869441827142e+01 2.6803379375291907e+01 6.2327958856974533e+01 0 0 0
151 1 11 -1.1500000000000000e-01 1.2507317170797283e+01 2.5547364204696372e+01 6.4432859697520485e+01 0 0 0
154 1 13 1.1500000000000000e-01 1.1983049132369356e+01 2.6117375174302417e+01 6.2469958386131552e+01 0 0 0
155 1 13 1.1500000000000000e-01 1.1548114511146228e+01 2.5055290436655490e+01 6.4497618206802230e+01 0 0 0
180 1 18 5.9999999999999998e-02 1.8814556722308541e+01 2.6077943004964780e+01 5.6029770274794004e+01 0 0 0
177 1 18 5.9999999999999998e-02 2.1155040867071492e+01 2.7786486152739904e+01 5.7058005767111474e+01 0 0 0
234 1 19 -1.7999999999999999e-01 7.8844138737820577e+00 3.2478674606102388e+01 6.2405184046263415e+01 0 0 0
231 1 17 -1.2000000000000000e-01 9.1938054949156420e+00 3.2768813994738814e+01 6.3306919536971428e+01 0 0 0
237 1 18 5.9999999999999998e-02 6.9947637783650283e+00 3.3080411079368098e+01 6.2591022950480330e+01 0 0 0
236 1 18 5.9999999999999998e-02 8.0479948090232778e+00 3.2142837902954312e+01 6.1381194305195130e+01 0 0 0
230 1 18 5.9999999999999998e-02 8.2766293500805528e+00 3.4635646912739858e+01 6.4118186551983698e+01 0 0 0
119 1 13 1.1500000000000000e-01 1.0765860942827358e+01 2.9440134329313839e+01 6.8712426141394630e+01 0 0 0
152 1 11 -1.1500000000000000e-01 1.3418200750130637e+01 2.5677799776193208e+01 6.5490937912024009e+01 0 0 0
147 1 11 -1.1500000000000000e-01 1.4582907371555152e+01 2.6277174405945612e+01 6.5255575507961765e+01 0 0 0
157 1 14 -2.8499999999999998e-01 1.4416623600231297e+01 2.7116478071284483e+01 6.1773503990253353e+01 0 0 0
158 1 15 1.4000000000000001e-01 1.5847512346344621e+01 2.7114194006055477e+01 6.1534253490069290e+01 0 0 0
160 1 16 2.9999999999999999e-02 1.6064812930203701e+01 2.6452753557450166e+01 6.0695577756837409e+01 0 0 0
148 1 11 -1.1500000000000000e-01 1.4903540776755893e+01 2.7009609390016436e+01 6.4111299773326820e+01 0 0 0
149 1 12 2.3499999999999999e-01 1.4000188768279489e+01 2.6877710723752365e+01 6.3081941255606203e+01 0 0 0
153 1 13 1.1500000000000000e-01 1.5785568748114970e+01 2.7625397297819344e+01 6.4015216942686195e+01 0 0 0
235 1 18 5.9999999999999998e-02 7.5343230141362358e+00 3.1534406262537242e+01 6.2822189665338605e+01 0 0 0
229 1 18 5.9999999999999998e-02 7.9361812630467687e+00 3.3067524534139004e+01 6.4916436379576112e+01 0 0 0
228 1 17 -1.2000000000000000e-01 8.6993132089566387e+00 3.3684603405486982e+01 6.4442153553379171e+01 0 0 0
222 1 17 -1.2000000000000000e-01 1.1283085177066981e+01 3.4870888677464770e+01 6.4549067763013710e+01 0 0 0
223 1 18 5.9999999999999998e-02 1.1420049547564025e+01 3.4377991638818251e+01 6.3586574769281746e+01 0 0 0
120 1 13 1.1500000000000000e-01 1.3270916872938020e+01 2.9364383334062047e+01 6.7989296332062594e+01 0 0 0
181 1 18 5.9999999999999998e-02 2.0396196951535888e+01 2.5384562030940948e+01 5.5767709225181008e+01 0 0 0
182 1 18 5.9999999999999998e-02 1.9689478856427776e+01 2.5696561341306221e+01 5.7346510410978354e+01 0 0 0
179 1 19 -1.7999999999999999e-01 1.9853262938275169e+01 2.6123475309081883e+01 5.6357056399937974e+01 0 0 0
178 1 18 5.9999999999999998e-02 2.0675554696527310e+01 2.7931119129912695e+01 5.5488212194869512e+01 0 0 0
176 1 17 -1.2000000000000000e-01 2.0274451188840771e+01 2.7595679383187942e+01 5.6444609683251031e+01 0 0 0
186 1 3 -2.2400000000000000e-01 2.0931428279204827e+01 2.7154299057384968e+01 6.4160212718683781e+01 0 0 0
187 1 2 1.0800000000000000e-01 2.0214594086076588e+01 2.8107713745197529e+01 6.3528219381910574e+01 0 0 0
183 1 1 -1.1600000000000001e-01 1.8723103080488656e+01 2.8187105668662678e+01 6.4585229303785979e+01 0 0 0
189 1 4 1.7399999999999999e-01 2.1906781290883163e+01 2.6830199480531107e+01 6.3828480949187480e+01 0 0 0
200 1 10 1.4499999999999999e-01 2.1427839187601069e+01 2.7064567588124604e+01 6.1512345263872540e+01 0 0 0
193 1 8 -1.6700000000000001e-01 2.1319590510982660e+01 2.8115697569210116e+01 6.1289168233527718e+01 0 0 0
198 1 8 -1.6700000000000001e-01 2.1855564001880321e+01 2.8735583219383386e+01 6.0150974976488563e+01 0 0 0
201 1 10 1.4499999999999999e-01 2.2014836575110536e+01 2.8104657739824766e+01 5.9289020635087375e+01 0 0 0
192 1 7 -7.2999999999999995e-02 2.0733846396187051e+01 2.8804188809120948e+01 6.2340146876552858e+01 0 0 0
197 1 7 -7.2999999999999995e-02 2.1832479845490038e+01 3.0154990885790749e+01 5.9994091397769502e+01 0 0 0
194 1 9 2.2900000000000001e-01 2.0443964364978555e+01 3.0217370428541063e+01 6.2119073990123859e+01 0 0 0
221 1 18 5.9999999999999998e-02 1.2539468549184321e+01 3.5352525957662159e+01 6.6061960272877272e+01 0 0 0
219 1 17 -1.2000000000000000e-01 1.2672110655557177e+01 3.4790341223548268e+01 6.5137592591942521e+01 0 0 0
220 1 18 5.9999999999999998e-02 1.2670796499274598e+01 3.3725601031671118e+01 6.5370887683619785e+01 0 0 0
216 1 17 -1.2000000000000000e-01 1.3961093758666621e+01 3.5318599503232200e+01 6.4698488250799343e+01 0 0 0
218 1 18 5.9999999999999998e-02 1.3892881115585359e+01 3.5505162424266388e+01 6.3626741400652328e+01 0 0 0
213 1 15 1.4000000000000001e-01 1.5064453409203661e+01 3.4322368541846984e+01 6.4943299202199825e+01 0 0 0
208 1 13 1.1500000000000000e-01 1.7338443992939606e+01 3.3511471131885351e+01 6.3201148170578975e+01 0 0 0
215 1 16 2.9999999999999999e-02 1.5145612004097202e+01 3.3704717649360177e+01 6.4048860456131820e+01 0 0 0
214 1 16 2.9999999999999999e-02 1.5085687063664789e+01 3.3655506124777808e+01 6.5805241014547931e+01 0 0 0
203 1 11 -1.1500000000000000e-01 1.7980970336391596e+01 3.3689162036393462e+01 6.4050845669942902e+01 0 0 0
212 1 14 -2.8499999999999998e-01 1.6302231451163028e+01 3.5068075819666859e+01 6.4998572696715627e+01 0 0 0
204 1 12 2.3499999999999999e-01 1.7488646203540899e+01 3.4471324580440417e+01 6.5112288029035028e+01 0 0 0
205 1 11 -1.1500000000000000e-01 1.7944953751881776e+01 3.4311174183727140e+01 6.6372823467846601e+01 0 0 0
206 1 11 -1.1500000000000000e-01 1.9248743643364161e+01 3.3681245543397033e+01 6.6468151482136108e+01 0 0 0
209 1 13 1.1500000000000000e-01 1.7452240490315440e+01 3.4631292031144653e+01 6.7279001268083093e+01 0 0 0
190 1 5 -2.9999999999999999e-01 1.9808170380334268e+01 3.1048668413017666e+01 6.3027514360593088e+01 0 0 0
199 1 9 2.2900000000000001e-01 2.1182522207526322e+01 3.0863691159248013e+01 6.1055134153485255e+01 0 0 0
196 1 6 1.3100000000000001e-01 2.0261322707414866e+01 3.3075232456663500e+01 6.1735047601710363e+01 0 0 0
191 1 6 1.3100000000000001e-01 1.9833751494676509e+01 3.2412879906360153e+01 6.2910697045892924e+01 0 0 0
238 1 11 -1.1500000000000000e-01 2.0438612923124079e+01 3.4547056181398517e+01 6.1464761225962150e+01 0 0 0
243 1 11 -1.1500000000000000e-01 2.0702408088082585e+01 3.5516869406393027e+01 6.2483009748603685e+01 0 0 0
242 1 11 -1.1500000000000000e-01 2.0745915738918452e+01 3.6873782931211366e+01 6.1944085236131905e+01 0 0 0
247 1 13 1.1500000000000000e-01 2.0955373311944754e+01 3.5298498668936951e+01 6.3510006738151006e+01 0 0 0
202 1 11 -1.1500000000000000e-01 1.9277627220405869e+01 3.3131234071370699e+01 6.4110471257362676e+01 0 0 0
211 1 13 1.1500000000000000e-01 2.0849668351156485e+01 3.2620643315981773e+01 6.5388020451811812e+01 0 0 0
207 1 11 -1.1500000000000000e-01 1.9849028659037401e+01 3.3025258806673889e+01 6.5350516968669496e+01 0 0 0
195 1 5 -2.9999999999999999e-01 2.0994288260054013e+01 3.2236402832762877e+01 6.0876812127224113e+01 0 0 0
279 1 4 1.7399999999999999e-01 2.3320542523163965e+01 2.9055199957645446e+01 5.7790385119964625e+01 0 0 0
246 1 13 1.1500000000000000e-01 2.1205486523448194e+01 3.7527862753756480e+01 6.2670290633899015e+01 0 0 0
265 1 18 5.9999999999999998e-02 2.6900106578062619e+01 3.7239341311784308e+01 5.4833696717391653e+01 0 0 0
270 1 19 -1.7999999999999999e-01 2.8613836135962810e+01 3.9033546365099660e+01 5.3321414831981848e+01 0 0 0
271 1 18 5.9999999999999998e-02 2.9035427204072750e+01 3.8086367925532294e+01 5.3657887686038386e+01 0 0 0
141 1 18 5.9999999999999998e-02 1.0630773996490117e+01 2.0476757219405389e+01 7.6240664594471710e+01 0 0 0
137 1 17 -1.2000000000000000e-01 1.1275690147788033e+01 2.1903533708370254e+01 7.4634011614439672e+01 0 0 0
138 1 18 5.9999999999999998e-02 1.0575667600702637e+01 2.1843999403904768e+01 7.3800629474021505e+01 0 0 0
144 1 18 5.9999999999999998e-02 8.7525416979310098e+00 2.1902534568143189e+01 7.5784603511006793e+01 0 0 0
128 1 17 -1.2000000000000000e-01 1.3163989203932980e+01 2.5147205841983475e+01 7.2824293976650949e+01 0 0 0
129 1 18 5.9999999999999998e-02 1.3495128755219230e+01 2.4924770359206750e+01 7.1809912857111158e+01 0 0 0
130 1 18 5.9999999999999998e-02 1.3976685846239839e+01 2.5608938915779337e+01 7.3385031706006487e+01 0 0 0
127 1 18 5.9999999999999998e-02 1.1576269863789960e+01 2.6076670468226691e+01 7.3940956390277293e+01 0 0 0
126 1 18 5.9999999999999998e-02 1.2120468791463328e+01 2.7040012884964867e+01 7.2584106313732732e+01 0 0 0
123 1 16 2.9999999999999999e-02 1.0341120942743078e+01 2.4843183024287722e+01 7.2280914814211926e+01 0 0 0
125 1 17 -1.2000000000000000e-01 1.1884521684963453e+01 2.6022846123141925e+01 7.2896837500096694e+01 0 0 0
139 1 18 5.9999999999999998e-02 1.1972262498729627e+01 2.1092560869736154e+01 7.4421385078861761e+01 0 0 0
124 1 16 2.9999999999999999e-02 1.0184091851140618e+01 2.6593087697535285e+01 7.1789272317421833e+01 0 0 0
122 1 15 1.4000000000000001e-01 1.0818231846253939e+01 2.5707006310277990e+01 7.1818016822532655e+01 0 0 0
113 1 12 2.3499999999999999e-01 1.1625388435652898e+01 2.6333988863163693e+01 6.9697559463106813e+01 0 0 0
121 1 14 -2.8499999999999998e-01 1.1264804844954959e+01 2.5273156323502036e+01 7.0517656088419642e+01 0 0 0
118 1 13 1.1500000000000000e-01 9.7981937997228243e+00 2.7651498695338852e+01 6.9781611928806413e+01 0 0 0
114 1 11 -1.1500000000000000e-01 1.0825145453509336e+01 2.7548086963642017e+01 6.9463686914797435e+01 0 0 0
115 1 11 -1.1500000000000000e-01 1.1392423713367819e+01 2.8560654430447819e+01 6.8694144947142561e+01 0 0 0
156 1 13 1.1500000000000000e-01 1.2976416180121582e+01 2.5347788074589676e+01 6.6419549063425222e+01 0 0 0
112 1 11 -1.1500000000000000e-01 1.2940882929003639e+01 2.6300850716313203e+01 6.9161350765742256e+01 0 0 0
117 1 13 1.1500000000000000e-01 1.3553074599940016e+01 2.5419502960047524e+01 6.9283201045026203e+01 0 0 0
105 1 6 1.3100000000000001e-01 1.5370975446256301e+01 2.6524162770252069e+01 6.6585224829682332e+01 0 0 0
104 1 5 -2.9999999999999999e-01 1.6675735544895499e+01 2.6486796146338325e+01 6.6502418604383521e+01 0 0 0
111 1 11 -1.1500000000000000e-01 1.3474400174713827e+01 2.7390592036365746e+01 6.8425471655642923e+01 0 0 0
99 1 5 -2.9999999999999999e-01 1.5706376031849176e+01 2.7710523563426396e+01 6.8804822526063731e+01 0 0 0
100 1 6 1.3100000000000001e-01 1.4848136093642136e+01 2.7299295774686911e+01 6.7873051059329484e+01 0 0 0
96 1 2 1.0800000000000000e-01 1.7373957076591918e+01 2.9409677801079248e+01 7.0545701524323533e+01 0 0 0
116 1 11 -1.1500000000000000e-01 1.2756246299081983e+01 2.8448844113859671e+01 6.8240895490801080e+01 0 0 0
92 1 1 -1.1600000000000001e-01 1.5831116579700000e+01 2.9387054920089795e+01 7.1171126646832832e+01 0 0 0
101 1 7 -7.2999999999999995e-02 1.7905747949168013e+01 2.8471917043358978e+01 6.9459359683717921e+01 0 0 0
103 1 9 2.2900000000000001e-01 1.7047890553809026e+01 2.7770108387917240e+01 6.8531762802769464e+01 0 0 0
108 1 9 2.2900000000000001e-01 1.7468902441420354e+01 2.6909106321794347e+01 6.7497468934781963e+01 0 0 0
19 1 10 1.4499999999999999e-01 1.4358500854694180e+01 2.9453712076047751e+01 7.3260586019766592e+01 0 0 0
106 1 7 -7.2999999999999995e-02 1.8780986913692043e+01 2.6867645750859278e+01 6.7055764365167008e+01 0 0 0
102 1 8 -1.6700000000000001e-01 1.9276130703729304e+01 2.8165750122429401e+01 6.9160034695908678e+01 0 0 0
107 1 8 -1.6700000000000001e-01 1.9683352926486364e+01 2.7240616376379716e+01 6.8159385692100400e+01 0 0 0
109 1 10 1.4499999999999999e-01 2.0055806434163017e+01 2.8725094417476512e+01 6.9655655231168168e+01 0 0 0
188 1 4 1.7399999999999999e-01 2.0896629354522371e+01 2.5801621439795127e+01 6.5959803149130408e+01 0 0 0
185 1 3 -2.2400000000000000e-01 2.0341296770833917e+01 2.6449048667679204e+01 6.5297350353764386e+01 0 0 0
184 1 2 1.0800000000000000e-01 1.9101963732310324e+01 2.6814023129778530e+01 6.5551663639667765e+01 0 0 0
110 1 10 1.4499999999999999e-01 2.0734616756426647e+01 2.7309660032733284e+01 6.7921736090003932e+01 0 0 0
90 1 18 5.9999999999999998e-02 1.9058534455954916e+01 2.4496591471814117e+01 7.2442366267123703e+01 0 0 0
87 1 18 5.9999999999999998e-02 2.1217661017774144e+01 2.4208615880115097e+01 7.3414750708995726e+01 0 0 0
91 1 18 5.9999999999999998e-02 1.9063104760522840e+01 2.4218979437828583e+01 7.4180146541609673e+01 0 0 0
88 1 19 -1.7999999999999999e-01 1.9329158925356932e+01 2.4935254960300544e+01 7.3402801990199052e+01 0 0 0
89 1 18 5.9999999999999998e-02 1.8734391316725521e+01 2.5675605304818081e+01 7.3937810005963854e+01 0 0 0
210 1 13 1.1500000000000000e-01 1.9702723104147982e+01 3.3449030687407273e+01 6.7420190824728678e+01 0 0 0
95 1 3 -2.2400000000000000e-01 1.8215609063290863e+01 3.0099784925949624e+01 7.1319421155540837e+01 0 0 0
16 1 8 -1.6700000000000001e-01 1.4152233000995386e+01 3.0419553407183130e+01 7.3697626173071882e+01 0 0 0
15 1 7 -7.2999999999999995e-02 1.5221860610033445e+01 3.1203394358860034e+01 7.3391355254831566e+01 0 0 0
94 1 3 -2.2400000000000000e-01 1.7417816239213401e+01 3.0930348474361537e+01 7.2136942679580329e+01 0 0 0
97 1 4 1.7399999999999999e-01 1.7858343786097507e+01 3.1532646231323110e+01 7.2917694171666852e+01 0 0 0
93 1 2 1.0800000000000000e-01 1.6090764117587685e+01 3.0742018233737806e+01 7.2224242012124478e+01 0 0 0
98 1 4 1.7399999999999999e-01 1.9245384295552427e+01 3.0332162742176720e+01 7.1091466068854530e+01 0 0 0
78 1 18 5.9999999999999998e-02 2.2243889886200019e+01 2.7773304919415061e+01 7.4264139070174579e+01 0 0 0
76 1 17 -1.2000000000000000e-01 2.1462230769345041e+01 2.8248939353848847e+01 7.3671787051729098e+01 0 0 0
77 1 18 5.9999999999999998e-02 2.0563208214580623e+01 2.8065300488949724e+01 7.4260120261235556e+01 0 0 0
71 1 18 5.9999999999999998e-02 2.3644713430154336e+01 3.0106279659241356e+01 7.4488248397994866e+01 0 0 0
70 1 17 -1.2000000000000000e-01 2.2622309208234626e+01 3.0439140911027380e+01 7.4667114567023802e+01 0 0 0
73 1 17 -1.2000000000000000e-01 2.1712080351191119e+01 2.9829415259253466e+01 7.3688920980323857e+01 0 0 0
72 1 18 5.9999999999999998e-02 2.2334730475576240e+01 3.0150737855509490e+01 7.5678164590861783e+01 0 0 0
75 1 18 5.9999999999999998e-02 2.2086429629218010e+01 3.0001078179504830e+01 7.2679716109574940e+01 0 0 0
74 1 18 5.9999999999999998e-02 2.0705268388459167e+01 3.0244810112166707e+01 7.3645588528247188e+01 0 0 0
81 1 18 5.9999999999999998e-02 2.0729509108912648e+01 2.8027333329743868e+01 7.1720854137509690e+01 0 0 0
80 1 18 5.9999999999999998e-02 2.2473596205360263e+01 2.8016570679145271e+01 7.1791022838935490e+01 0 0 0
84 1 18 5.9999999999999998e-02 2.1102297004746958e+01 2.5599129733473649e+01 7.1361021663512005e+01 0 0 0
79 1 17 -1.2000000000000000e-01 2.1578191289605176e+01 2.7628008827255329e+01 7.2276172747747523e+01 0 0 0
83 1 18 5.9999999999999998e-02 2.2528185369227252e+01 2.5574488113532418e+01 7.2310029039107093e+01 0 0 0
86 1 18 5.9999999999999998e-02 2.1191904846833612e+01 2.5365725208470664e+01 7.4449091942702196e+01 0 0 0
85 1 17 -1.2000000000000000e-01 2.0785908578357017e+01 2.5208847807176063e+01 7.3449763910825467e+01 0 0 0
82 1 17 -1.2000000000000000e-01 2.1523906887267458e+01 2.5997387265923770e+01 7.2283917127765562e+01 0 0 0
18 1 10 1.4499999999999999e-01 1.2402357528562598e+01 3.0030377280556074e+01 7.4619949869516816e+01 0 0 0
11 1 8 -1.6700000000000001e-01 1.3248557122780204e+01 3.0699438530514584e+01 7.4671943047433928e+01 0 0 0
6 1 4 1.7399999999999999e-01 9.9320816662838336e+00 3.0768152474581292e+01 7.8510069591905989e+01 0 0 0
4 1 3 -2.2400000000000000e-01 1.1464777038955928e+01 3.1084698121654011e+01 7.7008195319099684e+01 0 0 0
3 1 3 -2.2400000000000000e-01 1.0527233739949173e+01 3.1454401838704729e+01 7.7925898538658714e+01 0 0 0
7 1 4 1.7399999999999999e-01 1.1355984634698798e+01 3.0062722987852073e+01 7.6676335350639405e+01 0 0 0
1093 1 20 0.0000000000000000e+00 9.9505749118870881e+00 3.3488069013325564e+01 7.8650580387687341e+01 0 0 0
2 1 2 1.0800000000000000e-01 1.0395550079641064e+01 3.2878550354591567e+01 7.7877997638244011e+01 0 0 0
5 1 2 1.0800000000000000e-01 1.2197585117819486e+01 3.2065071909241887e+01 7.6382366589581892e+01 0 0 0
10 1 7 -7.2999999999999995e-02 1.3339418001127344e+01 3.1858795915818561e+01 7.5535594218209397e+01 0 0 0
1 1 1 -1.1600000000000001e-01 1.1819375051111590e+01 3.3563194704043497e+01 7.6949278268480583e+01 0 0 0
17 1 9 2.2900000000000001e-01 1.5352717464147839e+01 3.2485305575506494e+01 7.4141948713043334e+01 0 0 0
12 1 9 2.2900000000000001e-01 1.4408976185111211e+01 3.2816038471948644e+01 7.5202191391957442e+01 0 0 0
13 1 5 -2.9999999999999999e-01 1.6531654641695980e+01 3.3197324788113335e+01 7.4068294531513715e+01 0 0 0
29 1 13 1.1500000000000000e-01 1.4806823012958155e+01 3.6850401908037284e+01 7.7197029988747929e+01 0 0 0
8 1 5 -2.9999999999999999e-01 1.4657860335812632e+01 3.3892659875067999e+01 7.5955488072304689e+01 0 0 0
21 1 11 -1.1500000000000000e-01 1.7293528907926266e+01 3.4685852211584795e+01 7.8061497343916855e+01 0 0 0
25 1 11 -1.1500000000000000e-01 1.5572575446262052e+01 3.6449365857971756e+01 7.7844481374905214e+01 0 0 0
20 1 11 -1.1500000000000000e-01 1.6163680246675252e+01 3.5237633493328623e+01 7.7348560421217329e+01 0 0 0
9 1 6 1.3100000000000001e-01 1.5876686232799832e+01 3.4465153156098530e+01 7.6080995964072045e+01 0 0 0
14 1 6 1.3100000000000001e-01 1.6843886056855439e+01 3.4019521614218917e+01 7.5066942925600671e+01 0 0 0
22 1 12 2.3499999999999999e-01 1.7726733423930320e+01 3.5464791508454816e+01 7.9242954956077014e+01 0 0 0
26 1 13 1.1500000000000000e-01 1.7821082826188039e+01 3.3811821415280235e+01 7.7709138108990516e+01 0 0 0
65 1 13 1.1500000000000000e-01 1.7883840099280121e+01 3.6168069697450512e+01 7.3858004793972356e+01 0 0 0
56 1 11 -1.1500000000000000e-01 1.8212084102694174e+01 3.4438232766412526e+01 7.4983502360556884e+01 0 0 0
62 1 13 1.1500000000000000e-01 1.8531387563728536e+01 3.2483775423769558e+01 7.5606170623784507e+01 0 0 0
63 1 13 1.1500000000000000e-01 2.1914103744139357e+01 3.4621936908549955e+01 7.4157489370412478e+01 0 0 0
59 1 11 -1.1500000000000000e-01 2.0872349150819758e+01 3.4563691687230296e+01 7.4436334957594582e+01 0 0 0
60 1 11 -1.1500000000000000e-01 1.9989985249750056e+01 3.5573880429597473e+01 7.4098024241417562e+01 0 0 0
64 1 13 1.1500000000000000e-01 2.0384557809568484e+01 3.6538925070499850e+01 7.3816241814527714e+01 0 0 0
66 1 14 -2.8499999999999998e-01 2.1020758935249674e+01 3.2271225730798093e+01 7.5289753081909339e+01 0 0 0
58 1 12 2.3499999999999999e-01 2.0349487314526222e+01 3.3364616835000639e+01 7.4988428276319738e+01 0 0 0
61 1 11 -1.1500000000000000e-01 1.8641820402086228e+01 3.5519969769279463e+01 7.4272531444095918e+01 0 0 0
67 1 15 1.4000000000000001e-01 2.2253299067691284e+01 3.1958138063145981e+01 7.4608950368944150e+01 0 0 0
57 1 11 -1.1500000000000000e-01 1.9042173834506254e+01 3.3359147025044379e+01 7.5233046053075810e+01 0 0 0
68 1 16 2.9999999999999999e-02 2.2186147911652537e+01 3.2318175451535268e+01 7.3582322911569364e+01 0 0 0
30 1 14 -2.8499999999999998e-01 1.8879270972453362e+01 3.5032510309554048e+01 7.9958757819273927e+01 0 0 0
69 1 16 2.9999999999999999e-02 2.3162248918165535e+01 3.2453694398123872e+01 7.4950028360799507e+01 0 0 0
23 1 11 -1.1500000000000000e-01 1.7223303349670452e+01 3.6722071975844926e+01 7.9546422745538678e+01 0 0 0
28 1 13 1.1500000000000000e-01 1.6058351311426001e+01 3.8308608064480396e+01 7.8875074295090116e+01 0 0 0
24 1 11 -1.1500000000000000e-01 1.6201352315327448e+01 3.7251536222244582e+01 7.8706107336085239e+01 0 0 0
27 1 13 1.1500000000000000e-01 1.7677465240924754e+01 3.7463165243093819e+01 8.0187451407745513e+01 0 0 0
32 1 16 2.9999999999999999e-02 1.7825012508159940e+01 3.5076995274720382e+01 8.1708828403989145e+01 0 0 0
48 1 18 5.9999999999999998e-02 1.7199277970191908e+01 2.9978905106734462e+01 8.0267255011665114e+01 0 0 0
41 1 18 5.9999999999999998e-02 2.0657232732673588e+01 3.0782210469256540e+01 8.0401907820914516e+01 0 0 0
40 1 17 -1.2000000000000000e-01 1.9764014248789472e+01 3.1320140010851269e+01 8.0084271925610921e+01 0 0 0
42 1 18 5.9999999999999998e-02 2.0381781773035495e+01 3.1860960998763332e+01 7.9367350343109550e+01 0 0 0
37 1 17 -1.2000000000000000e-01 1.9313693791534213e+01 3.1907688361271958e+01 8.1429931561056804e+01 0 0 0
44 1 18 5.9999999999999998e-02 1.9121110305355884e+01 2.9992046570551558e+01 7.8365060187420724e+01 0 0 0
39 1 18 5.9999999999999998e-02 1.8909149104959077e+01 3.1158855472839903e+01 8.2110882270062504e+01 0 0 0
38 1 18 5.9999999999999998e-02 2.0239136480946680e+01 3.2227515638680131e+01 8.1908855795638630e+01 0 0 0
43 1 17 -1.2000000000000000e-01 1.8919186391675712e+01 3.0433292477079295e+01 7.9341087341767945e+01 0 0 0
45 1 18 5.9999999999999998e-02 1.8262214854426894e+01 3.1217965148657608e+01 7.8965884465589127e+01 0 0 0
52 1 19 -1.7999999999999999e-01 1.6328946960665203e+01 2.7426226745182952e+01 7.8947109018444962e+01 0 0 0
54 1 18 5.9999999999999998e-02 1.6231807496799156e+01 2.6563604634220809e+01 7.8287907051563835e+01 0 0 0
55 1 18 5.9999999999999998e-02 1.5419618501478643e+01 2.7968060303254447e+01 7.9207182384953043e+01 0 0 0
53 1 18 5.9999999999999998e-02 1.6720343614012521e+01 2.7092701464057338e+01 7.9908186304754679e+01 0 0 0
49 1 17 -1.2000000000000000e-01 1.7359231643557287e+01 2.8447969264533324e+01 7.8468827293980112e+01 0 0 0
51 1 18 5.9999999999999998e-02 1.8211664675602705e+01 2.7814203137311132e+01 7.8224286940221958e+01 0 0 0
50 1 18 5.9999999999999998e-02 1.7108719361499862e+01 2.9128725226724853e+01 7.7655245565010219e+01 0 0 0
47 1 18 5.9999999999999998e-02 1.8357586295013245e+01 2.8618564725493282e+01 8.0498103667748737e+01 0 0 0
46 1 17 -1.2000000000000000e-01 1.7935683226269738e+01 2.9332109552795679e+01 7.9790324337478097e+01 0 0 0
34 1 17 -1.2000000000000000e-01 1.8282547353439664e+01 3.3062385565849418e+01 8.1505856853381886e+01 0 0 0
36 1 18 5.9999999999999998e-02 1.7315099997790213e+01 3.2868664154270640e+01 8.1042588429080666e+01 0 0 0
1089 1 19 -1.7999999999999999e-01 4.0035555982767711e+01 7.9077780298084647e+01 3.5824688279954769e-01 0 0 0
1092 1 18 5.9999999999999998e-02 3.9364784103492035e+01 7.9912793513267331e+01 1.5596492706725940e-01 0 0 0
1090 1 18 5.9999999999999998e-02 4.0375481782999643e+01 7.8839996003589476e+01 2.7935027414164415e+02 0 0 -1

Velocities

979 1.7877201249656364e-02 4.0058992748781247e-02 9.9635767684681624e-03
980 1.4340949209647390e-02 1.6043745714479817e-02 -6.6519561893435845e-04
981 1.3559066685273286e-02 1.5756004668561495e-02 5.6821280019286316e-03
973 -2.3630764320944408e-02 2.6897381312699378e-02 9.8205242953644679e-03
977 9.3806827043427504e-03 4.9705107549206876e-03 6.8323356061437369e-03
978 2.3151275037346417e-02 -1.6907545917090388e-03 3.1520787605457221e-02
1019 -1.5138553163533412e-02 2.4289220494226379e-03 -1.6171812426779026e-02
1012 -4.2119796466776044e-05 4.6642728011638806e-03 6.4319634405874369e-03
1018 -1.1712815647768484e-02 8.0103781655230192e-03 5.5020495013287252e-03
1016 -4.8299998477944785e-03 -1.9944124284514068e-03 9.8173928590283722e-03
1017 4.7190234689929314e-03 4.4819694514923953e-03 7.8408970181038963e-03
1094 6.7949072409246788e-03 -2.1110720115339970e-02 -1.3076392625833069e-02
1020 1.9074702398746132e-02 -5.0238799458752811e-03 1.2993535617480472e-02
1008 1.4259230120954139e-02 -2.1646820925895260e-02 -2.3156240121437435e-02
1005 3.7726579737417231e-03 -1.1951123415572459e-02 -9.9666514838514918e-03
1011 -1.6869260715859490e-02 6.1865834482830988e-03 -5.7186533127243817e-03
1006 -3.4689034259827341e-03 1.0222358118088777e-02 1.8537243821890514e-03
1009 -3.7069940677515074e-03 4.9328011413120746e-03 -4.1666007107610068e-03
1013 7.0424521432601236e-03 2.5009425042211209e-02 -2.1143528132671792e-02
1014 -9.0150351271713527e-03 9.2214357988117340e-04 5.6981209238477935e-03
1062 -1.2390447523286754e-03 -4.9284752221871835e-03 4.1820679845450803e-03
1066 3.1539688406552427e-02 -2.3235892368932212e-02 1.0156085035272043e-02
1061 -1.6481527817324545e-03 -6.4777489689110028e-03 1.9079041008006968e-02
1010 -4.7515606949620230e-03 -1.1737020894805271e-02 3.9647849353161473e-03
1015 6.8209279033125863e-03 3.3716863957864540e-03 -1.4582462138594028e-02
1059 8.1137113584357750e-03 1.8798152039898295e-02 -1.2550015462443926e-02
1030 -1.3938934634239827e-02 9.7883757766388125e-03 2.2870088415376660e-02
1057 1.9114541432436925e-02 -2.2630336052747004e-03 -4.0823542388987132e-03
1058 2.3291799760886338e-03 1.9317147789031717e-04 -1.9400215552959948e-03
1063 2.3911983383769729e-02 -8.4202678455934602e-03 3.3750487395320238e-02
1067 -4.5777228823838398e-03 1.1559094913098415e-02 2.2324407921027463e-03
1065 -9.3313018067625233e-03 2.3954395144582797e-02 2.5515596246959171e-03
1070 -1.3630517965894595e-02 2.1119274034517039e-03 1.6893531753964419e-02
1069 7.2132747624236113e-05 2.0168254540733305e-02 -1.3577815953019092e-02
1074 -1.3575258552999171e-03 -6.9346797393364315e-03 -9.5933778770365460e-03
1071 -3.1121508674758595e-03 -8.6338414613587892e-04 -6.3942250787467321e-03
1068 -1.1593104171862996e-02 -6.8370570767232997e-04 -1.0850445626716608e-02
1075 -3.2673278421382359e-03 -1.2678129207185760e-02 1.7063158543277283e-03
1073 -1.8782469525896000e-02 4.9577446663680198e-03 1.0507769406431139e-02
1060 2.2128469096666303e-03 -4.0020279728040925e-03 6.5875748843604925e-03
1064 3.1195440002846405e-02 2.4681079422606843e-02 7.7165874754198768e-02
1077 -6.3540146566782767e-03 4.2857967007448334e-03 -2.7891256890241549e-03
1076 5.6683590834700039e-03 1.5571242223890152e-02 -1.9955978337661356e-02
1078 -2.5523555376416405e-02 3.0229945085519009e-03 -1.8106712541221488e-02
1087 8.5387496608296809e-03 2.3454560287444028e-03 -5.2652635925419244e-03
1072 1.6020878394095548e-03 5.0357772467224914e-03 2.2525001608944408e-02
1086 8.4250182197076178e-03 2.0993383521751368e-03 -9.6053888039139366e-03
1083 1.7524500267187494e-03 1.3785139653449021e-02 -2.6879235185677751e-03
1080 1.4813518121917612e-03 -3.0160979353937270e-03 1.8362893268433699e-03
1085 -2.1064482654747758e-02 -3.3230294358609995e-03 2.1135180643787336e-02
1079 1.4381498587976967e-02 1.1923500346020728e-02 -4.7386727604130487e-03
1082 -4.3746476716345191e-02 -2.0180267917451044e-02 1.2114188563134542e-02
1081 8.1043096325319579e-03 1.0185452992508573e-02 -3.2387965637991609e-02
1084 -2.0856232405361032e-02 -2.1223331961760248e-03 4.3656387291388890e-02
1088 1.8965419952644513e-02 7.8153158852440861e-03 1.6495020839496482e-02
987 -9.3567234629761305e-03 5.3527363436054940e-04 1.6054798577036525e-02
986 -3.3776787854681331e-03 -1.1683614361051417e-03 5.0297699424063673e-03
991 -4.8508987574956402e-03 2.8221039451719152e-02 7.6738765527999747e-03
988 2.0339653700260828e-02 -6.8372954546988638e-03 7.6943939425018560e-03
989 1.7398465014094602e-02 -2.3700835164771994e-03 2.1519445304828593e-03
1000 2.6545450757555636e-03 -1.1752319654516967e-02 -1.6141322176989683e-02
993 7.6553424385426708e-03 -4.8119451709400574e-02 4.3775673320309932e-02
998 -7.1772066490401101e-04 2.7207449367049742e-03 -1.5370021702891755e-02
995 -6.4905053055111534e-03 -4.8031429966005814e-03 1.4785781512859082e-03
992 -1.0296623138671192e-02 1.8548535318603295e-03 -4.8286354801979616e-03
990 1.2432897545279820e-02 -1.4915242533609631e-02 3.5732330524479508e-03
994 -1.3055236226560081e-02 5.1949350729026177e-04 -6.9683650083581412e-03
999 -3.8421554468533424e-02 1.7367806602582008e-02 -3.3719808128048374e-02
996 -4.4652209155783690e-03 4.9516154597929142e-03 -1.8477365733176015e-02
997 9.8780763199230459e-03 -6.0978870605059524e-03 -1.7259693948866998e-02
1001 -8.4708157999001162e-03 -4.3251345191302679e-03 4.1076460780385985e-03
982 7.4557219883190666e-03 1.5890819047148372e-02 6.8853203205958855e-04
940 1.1832444090881132e-02 -8.0021093836955375e-03 -6.6535283215673536e-04
943 -2.5148467894561214e-02 3.3049355059378512e-02 2.9079576226914098e-02
945 1.3495759152271247e-02 -1.5738720976040472e-02 1.1328712772546982e-02
942 -9.1596458755901031e-03 2.4627922329513979e-02 2.9333207610494984e-02
941 -3.1767080984494559e-03 5.2160557846635041e-03 9.3447862946379422e-04
952 -9.0783030304264802e-03 -2.4111800167902930e-02 -1.0406566972794403e-02
944 1.4714438072728610e-03 -3.8074925478886242e-03 -1.0235744552012816e-03
946 -2.6505882614986598e-02 2.2093057457511218e-03 -1.9227736991924267e-02
947 7.3818133736886530e-03 7.2263133330319595e-03 -3.6046242692061282e-03
950 -8.1204314795546816e-03 9.4564270316093021e-05 -6.6972782959993961e-03
948 4.0406324067505342e-02 9.3837969877695257e-04 1.2139630988413244e-02
949 7.2563875733364864e-03 7.3971678913277222e-03 -4.5703821657565192e-03
958 -7.3160621949079144e-03 1.4739193356299276e-02 2.7320632924574144e-02
960 -3.6412280081192440e-02 -1.8257242490321783e-02 6.9778135494177650e-03
951 6.3008017089650715e-03 -1.1019610846717312e-02 9.0463288383333014e-03
953 -1.8500904132723653e-03 2.7091333215636449e-03 -4.8255188469899495e-03
954 2.6194841967055308e-03 -4.8963082063185068e-03 8.0539535970054299e-04
983 2.1943159358185690e-03 -3.3562110252465431e-03 -3.4744194663348061e-03
985 -7.6200076378075644e-03 -1.3913053203907488e-02 1.1113516117651094e-02
976 9.4242122670474531e-03 3.3822155676596231e-04 4.1964739468464971e-03
968 3.6729297408115069e-03 4.2170632893959387e-03 1.7346109695341790e-03
969 1.2411965276266224e-02 6.5208982804691061e-03 9.0681685824756577e-03
967 1.0304716800797011e-02 5.0713447291609575e-03 4.7208709834091001e-03
984 -3.3912998058066111e-03 -1.9792214970347586e-02 -2.7349989643668193e-02
882 -1.0408513083703882e-02 2.4206961359505258e-02 -1.5534528449072254e-03
879 -4.3385806098429659e-03 5.7455114796586297e-03 -1.1405854581202470e-03
878 -2.7442758929081979e-03 9.9807498472892029e-03 -1.1048008023014557e-03
883 2.3323181936785516e-02 -1.6101312838427622e-02 1.3410546057531158e-02
880 -3.1293880874584128e-03 -8.7979541161651454e-03 8.2997208677686972e-03
931 7.8540649814597043e-03 -5.5960077252093076e-03 -8.7726537194085831e-03
932 -4.0515069312327540e-03 1.2900288200196633e-02 -2.8830711472849430e-03
877 6.7188807776759557e-04 -1.4574399679921456e-02 1.6629230133091723e-02
876 1.2209159562892475e-02 -5.4984490975551166e-03 4.7484690836427715e-03
972 -1.0803609804189764e-02 -4.0762993090548566e-02 -2.1238737734140874e-02
966 2.5907640879059800e-03 9.1496585643197209e-03 -5.8239214010873666e-03
923 -9.2202282556659177e-03 5.6850352751846864e-03 -4.9616806697195572e-03
924 -7.0520962157571369e-03 -7.6710810114192377e-03 -9.0139239724886609e-03
919 -4.4517297561576311e-03 -7.2017720696335706e-04 8.1213029300464985e-03
935 2.3532101501680461e-03 4.8382071722179627e-03 -7.4544547206672476e-04
930 1.2570994185352340e-02 2.2107917926908844e-03 5.2528697957712634e-03
918 -1.2515303536136254e-02 1.6410124463834162e-03 -5.3710415591564547e-04
971 5.8456016218146013e-03 -9.7694152870712609e-03 -1.4782379837554416e-02
970 1.9139451630000314e-02 4.8942463539216417e-03 -1.6131598522326072e-02
974 1.2006872321197048e-02 -1.5216320457772678e-02 -3.0300057700558783e-02
936 2.0795321124133261e-02 3.5740117358964270e-02 2.6165131506812881e-02
975 -3.6056971748378623e-02 4.5346102635292936e-02 3.3158267976605892e-02
896 -1.3464720609638535e-02 -1.3422522305597477e-02 -1.0825842640949008e-02
892 -3.5986820771591022e-03 1.1702101115352529e-03 -4.4079016058533272e-03
893 1.4375545725183379e-02 -1.0841940798921949e-02 -2.1634278508355208e-02
897 1.1792326741469862e-02 -1.2700657685378364e-02 -7.0827110742495755e-03
895 1.1088308289571509e-03 4.7586682110269457e-03 -4.5410894104517818e-03
894 -2.1885585593325790e-02 1.5563940786414137e-02 -6.8812887400872946e-03
898 4.9629641708583642e-03 -4.9448361197215514e-03 -1.7649819604477639e-02
900 -2.0363632581244066e-02 1.2312779775384773e-02 -3.2014260583013900e-03
1002 -2.1125119622014635e-03 5.7331902184883429e-03 1.1356555017812563e-02
891 -4.9029202091663157e-02 -1.2235807958261714e-02 -2.7566649047605103e-02
889 -1.9094280503701635e-03 5.1432079971803525e-03 1.0828228295813843e-03
890 -3.8333912897826992e-04 -1.1322949522041149e-02 1.4505026379058629e-03
886 -4.7348404365670079e-03 -1.3556633123832187e-03 6.1675399748620874e-03
887 9.0514405305858123e-03 1.1925564742655943e-02 -3.6481607986389997e-02
888 -8.8973299026159664e-04 1.3516084938090317e-02 -4.9418748652093995e-03
885 2.4514708012009750e-02 -4.7970560106378778e-03 -2.9494788796804753e-03
920 8.5153844778900513e-03 -1.5668016310309914e-03 1.7233487117907719e-03
922 -2.5192043675538482e-03 1.2526013167152449e-02 -4.2925223235268432e-04
899 9.2235918658251474e-03 -8.2973293996014205e-03 -1.4196471432741109e-02
1037 -3.0784904977491671e-03 -4.0427217924879758e-02 2.7747640370964190e-02
1004 -3.7684886185549186e-03 1.0363610126222843e-03 -1.9964930225207958e-04
1007 4.5184001908895009e-03 -9.7192156075058891e-03 -9.6725126562328539e-03
925 -5.9018134570693985e-03 6.9388251158966135e-03 -1.8638337888904207e-03
927 4.4900574156589105e-03 -8.5833456205790639e-04 -8.2180762823949108e-03
1003 1.0282998584726900e-02 2.5755960469411123e-03 -2.2165649186246983e-03
929 -2.3644684630801306e-02 2.1379767761753977e-02 -5.8374368230809610e-02
926 -4.7775404597241543e-04 1.5034431181570816e-04 1.0899424922972342e-02
928 1.2287093432191884e-02 -3.4934892134784699e-02 6.0010264830464193e-03
921 2.7133010125273394e-03 -8.4181149109554786e-03 -4.0595500247801904e-03
905 3.5174973939298216e-03 -5.9529708349354803e-03 -2.1046960171267538e-02
903 -2.7370139928767851e-03 -2.8963644616656882e-02 3.7759476697496533e-03
901 -7.2952078668814761e-03 -1.4221279885927597e-02 -1.9855226312779292e-03
908 1.6290433766536799e-02 -1.0118333050253491e-02 -3.3522904261378940e-03
904 -9.1872751339596870e-03 -6.1743038568950169e-04 -1.0010011992504656e-03
907 7.3159360774183125e-03 -1.9096249012741046e-03 1.7573932988962676e-02
909 -1.3614744434726322e-02 -8.5829532694057156e-03 5.7580100698585893e-02
910 3.5003899299527043e-03 9.3682660126546639e-03 1.7668568341561490e-02
902 -8.1640478220097110e-03 -1.5992224720302966e-02 1.8675525379326780e-03
906 -6.8798136277682135e-03 -1.7197636961928865e-02 1.8040422288901310e-02
1033 -1.0969218830078221e-02 -1.6766540062394530e-02 -1.5721453032273333e-02
1036 3.5333321814498948e-02 -3.4145302507925654e-03 1.7077540830949371e-02
1035 -5.1113319200997518e-03 -3.5129320898079561e-03 4.7823568872065298e-05
1038 -1.8250222389501821e-03 -6.4209578711154252e-03 4.6580158789204032e-03
1039 1.4321162525350263e-03 -7.6168119718871352e-03 6.3890637364427023e-03
1032 -5.8630099466569514e-03 3.7797194337505055e-03 4.1709933689074597e-03
1021 -5.8264032870206030e-04 -3.6145232919217399e-03 -5.4602865125329475e-03
1027 -2.4000245411414114e-02 1.1377361385625328e-02 -6.5746682363111248e-03
1022 1.2202009235994387e-02 3.1723631227461233e-03 4.5573242391971375e-03
1034 1.8892676372472994e-02 6.4651307037251931e-03 -8.9456419075729541e-04
1023 1.2245473574010696e-02 1.0799502718155038e-02 -6.6292263210805885e-03
1026 2.3418865242233922e-03 4.0429806488437796e-04 5.5321335338246449e-03
1031 1.4710120463061452e-03 6.8752555295439437e-03 -3.6401244371274586e-03
1024 6.5550027250351802e-03 -5.1372114201259688e-03 -4.4313273294126904e-03
1025 6.4671265666433149e-03 -7.6590368831493810e-03 -3.8133145043411174e-03
1029 5.5898532831518090e-03 -4.4483331458368873e-03 -1.7188867830846069e-02
1028 -4.6171494586443873e-02 -1.2001987573578402e-02 1.1769510110596650e-02
35 5.4185624283292115e-04 4.4492044522133622e-02 -1.9747159204942322e-03
1091 2.3367804148932823e-02 -1.5141003943960158e-02 3.0572339445204207e-02
31 -1.1164831725625709e-02 -1.3929825449006982e-03 5.6227746918613960e-03
33 1.0506953090091857e-02 -1.2386693155568347e-02 -3.7578407332379993e-02
763 -1.3905097333748086e-02 -3.5617355786043228e-03 -8.4088229052680912e-03
761 -1.3990242439603629e-02 5.5385988850778708e-03 -8.7721689798802467e-03
870 3.8359775208436447e-03 2.8512086460334738e-02 -6.2677751124973376e-03
868 1.1271384619253189e-02 7.4617676211405628e-03 2.5239196002564616e-03
869 2.9837589882286703e-02 1.2574921357832785e-03 2.4202779595835504e-03
854 -4.3558133484671739e-02 -1.4266988502885028e-02 -2.4140772731247689e-02
853 -1.4655428942980466e-02 3.6769752165854265e-03 1.8764844195292383e-03
856 -4.7018556735061515e-03 3.6459490232552683e-03 5.0148411469275716e-03
855 1.6353832946990988e-02 -2.4274641444983265e-02 -4.1605526203022684e-03
789 -1.7034077179613747e-03 7.6919865714332658e-03 5.3029690131182021e-03
846 -1.1883557211824424e-02 3.7237770685609919e-02 8.4841420226139524e-03
849 -7.9736799590217396e-03 3.4179402568872649e-03 -5.5986050660793967e-03
850 1.4473271912715852e-02 2.2531839114695892e-03 1.0325212459075328e-03
851 9.4733443387084414e-03 1.9177946903797146e-02 1.2353051214173166e-03
793 5.9689072839770258e-03 2.6512919486250570e-02 -2.3308260088869933e-02
860 4.6615537057358063e-03 2.8480003263724723e-03 -7.0283084350021017e-03
937 -1.8568142068738806e-02 -2.3451948536493033e-03 -3.2245782199967842e-02
857 2.0750225023780097e-02 -1.6504066631995950e-02 -3.8143050972376355e-03
852 7.4869532813296507e-03 -2.1767593763430869e-02 1.0366086015066479e-03
866 3.8234456984610032e-02 2.0753138678679221e-02 -2.4983960377517118e-02
957 1.7582414379872364e-02 3.7486867194084226e-04 2.5716934110448258e-02
955 2.4520547645252785e-02 -1.7793175523759246e-02 3.1404533038116071e-02
959 6.4890618831042347e-03 6.3681591309042152e-04 7.3293566568593781e-03
956 -2.3728122419096383e-03 4.9189062439086266e-03 1.1774973745809013e-02
961 3.8061125720751918e-02 -3.7533964863804746e-02 -3.4210754335946600e-02
964 6.9144796912001564e-03 2.1306690884825778e-02 -3.8433283076910955e-02
962 1.6510195213873073e-03 -1.2241260301685264e-02 -9.0109023526394119e-03
963 -3.6458916634191131e-02 1.3938241918569776e-02 5.7010224259272040e-02
792 3.0822179301113500e-02 1.5698578830389793e-02 8.1233137121305510e-04
791 -8.6726569236447411e-04 -1.1981555610622965e-02 -1.7171788199916969e-02
788 1.1268296228539148e-02 3.6275232294961709e-03 2.2899017274494813e-03
787 9.6641686400051052e-03 1.8519496613652315e-03 2.1082790471097269e-03
847 3.4192774614896046e-02 2.7329753044332609e-02 7.3118557987690326e-03
843 7.1178315511589603e-03 1.0253623188375027e-02 1.8554353247814057e-02
844 -9.6496669254370650e-03 -8.7525883557294220e-03 -1.6946626418753324e-03
848 -2.2322822732486505e-02 -9.1096750459963242e-03 -1.9540234655361588e-02
842 3.9298705470753393e-03 2.6945454563854494e-03 -3.3649551386911612e-03
841 1.9532708662551379e-03 3.0519715434709103e-03 6.9105225196042491e-03
828 6.3873960718403046e-03 3.7495335727063964e-03 -1.3522617548703928e-03
839 3.5954432973501062e-04 9.1807550802761072e-04 1.1866651203521179e-04
840 -5.7263168659463237e-03 3.9192749614368758e-03 3.4549619821787631e-03
845 2.4726459151203665e-03 2.1156018452701139e-02 1.9583760818016934e-02
797 -2.0299271748250781e-02 -4.7247759784721316e-02 1.1301506843191234e-03
800 1.6736562794203717e-02 -5.2287920467197924e-03 2.3950812235818911e-02
795 -1.2269631151750786e-03 -6.8356608372590743e-04 -3.8048518979821666e-03
786 1.1297332777278678e-03 1.9874364790518038e-03 6.5971576859785502e-04
794 2.9336104655422416e-03 -9.1208585204092824e-03 -9.2598254650950278e-03
808 9.2432504827451838e-03 1.7781908349183841e-02 1.0308501629943873e-02
799 -7.0942048468440504e-03 -3.1021536972206585e-02 -7.5243427290789646e-03
798 7.5630910480040748e-03 -2.4155922740954692e-03 1.2203162381099462e-03
827 8.3479721464235906e-03 -3.2727955228956237e-03 1.1144421206487292e-02
796 -8.1297142594179885e-03 1.6401212466851545e-02 -1.1307943655101091e-02
875 -1.9430048368710095e-03 -4.7361427429429420e-03 3.6862859404982484e-03
934 -5.1283839918651354e-03 -6.1975102135342890e-03 -5.0149345917708315e-03
933 -1.2762109849549456e-02 3.6885096382800659e-03 1.5536875376461977e-02
939 -3.3923147420483184e-02 -2.3033544302706665e-02 -4.9604611492066021e-03
884 3.5646943684301394e-02 -1.9900615083718451e-03 3.1225959777989965e-02
938 -2.7757862414223251e-02 2.3705647936325697e-02 -3.0251288132338711e-02
833 -9.8493233334043251e-03 6.2488522330273388e-03 6.5958458270647070e-03
832 1.1284008264203133e-02 1.2121263571216708e-05 8.3686032703270286e-03
831 -3.7893488700085237e-04 6.9979893824982974e-03 -3.2196727697984579e-03
829 -5.4841097127573202e-03 -8.1443930388821833e-04 4.8596530363560122e-03
836 1.2349327736153095e-02 7.4174663858140848e-03 -2.3651121633633814e-03
830 -4.7630287868571071e-03 -7.0672251172909564e-03 -3.8432714253423864e-03
965 2.2816874188514830e-02 9.6060174251893123e-03 -6.1501768143512013e-03
809 -4.6266179151972760e-03 5.8734938331210639e-03 1.2340128494843320e-02
803 -1.0178789787098316e-02 2.7018939368705613e-02 -3.2387257911954771e-02
802 2.7961337152574459e-02 -2.4037785671239754e-02 -4.3981620667639061e-02
801 -3.8681741807138851e-03 3.4773392885764204e-03 -2.4406580118321261e-03
807 -4.9065097345872373e-03 8.6644330219359834e-03 1.0829292610148969e-02
804 -2.4470863844429581e-04 3.9047216951867045e-03 4.2914405294953821e-03
881 -9.1424815934377998e-03 2.1250383925982559e-02 -1.7258021472703455e-02
911 4.3784937134677838e-03 -1.0917319348130875e-03 -4.1914893278898555e-03
915 -6.3066834922061131e-03 -4.1135634612778395e-03 7.0309273245104621e-03
914 1.4872380641373419e-02 -2.0729750804447045e-02 9.1289269476713640e-03
912 1.2542906714748328e-02 -1.6682255439670773e-03 5.7695795936787185e-03
834 3.4194821644441911e-03 -5.1570862321082623e-03 2.8008367907770902e-03
916 -6.4316969130049344e-03 3.8143508294842969e-02 1.3659721881023839e-02
913 1.2613826294068979e-02 1.0875047909447185e-02 1.7693203074777347e-03
835 -6.8007301449049375e-03 3.9187617734295676e-03 -1.7243953874382132e-02
838 -1.1210799649451254e-02 4.3119600137950945e-03 4.7634442014612755e-02
917 1.0097731309031664e-02 -9.1123606369284890e-03 -3.2032760848059283e-02
1046 1.8813573680523971e-02 -6.9958186635448987e-03 1.4165946431473323e-02
1055 1.0030146181272735e-02 -8.1838038842216975e-03 1.0457014783689085e-02
1051 4.7466552184689910e-03 -2.1986430911798936e-02 -4.8145991393501709e-02
1042 -3.0355286087489640e-03 -3.9468984120198079e-03 1.1022387309899014e-02
1041 9.3564955811295987e-03 -5.1238291903737496e-03 -1.5524697690289498e-03
1040 -3.8201503500985799e-02 1.0919708912593811e-02 8.1514121941279154e-03
1043 1.8275086099925010e-03 1.3295037751515930e-02 -8.0068929602209512e-03
1048 -3.7347216242368197e-02 -1.5473566371739026e-02 -2.1461620464906274e-02
1044 -3.2030344725398623e-03 -6.1322393177596513e-03 2.2680319750858183e-03
1047 6.1900045623751879e-03 -4.1979252285274877e-03 -8.7039322589217913e-03
1050 -2.7500627166552688e-04 4.1269385087839639e-03 6.5787913717272868e-04
1049 -7.7241752017015994e-04 5.6177504469328886e-03 -1.1994774889879031e-03
1045 9.7305140989402249e-03 -3.2238823229974373e-02 3.7644237755225317e-02
1053 1.0612714594690380e-04 -8.2293812993271542e-03 1.2874751600342048e-03
1052 -3.2699450738694652e-02 -3.2569574304731320e-03 -2.9525005755580532e-02
1056 3.1325716251015328e-03 -1.9083263721437975e-02 -1.2528169790298615e-02
782 4.3737405454295553e-02 -1.5847755322339241e-03 -5.0939545172476262e-03
781 1.8312621669690235e-04 1.0603689670259998e-02 -4.9525751309636313e-03
783 -9.3630869549351566e-03 -6.2685526291753682e-03 2.5967350473504288e-02
776 -3.3181295104701712e-02 8.7317375301728326e-03 -2.6902289044312161e-02
778 -3.8746276981291208e-03 2.8166456443795146e-02 -1.3419822374641791e-02
780 8.3567964687963729e-03 1.0499191682045264e-02 -1.5976301263852081e-03
769 9.6058410781841991e-03 2.8642399429371513e-02 5.3368680272472182e-03
766 7.9705241993162923e-03 -2.8565194588273050e-02 -1.9786068601416056e-02
765 -3.9340767657933739e-03 4.4224445330087519e-03 3.6719137223914541e-03
770 -6.2280014011244023e-03 -2.8674176751239726e-02 -1.5356744676091971e-02
768 1.3420414640847552e-02 6.0684193046873502e-03 1.8557204552322832e-03
774 1.4402191900036726e-02 -8.5282355787620872e-03 4.8864102294657258e-03
775 3.8351554070363567e-03 3.8540996371145664e-02 -3.1064600578809350e-03
777 5.4168224538830882e-03 -1.2976392236235645e-02 -1.8651328281285830e-02
779 2.0850123114722372e-02 -2.1434163390674964e-02 3.0561613334062675e-02
773 3.8504885389342658e-02 -1.7312758521364685e-02 2.2242179709873904e-02
771 -1.2086491684283581e-02 5.6530727432941080e-03 -2.6099452339002462e-03
772 8.8804929104330868e-03 -7.0482314090136531e-03 -1.1947856732013146e-02
760 5.1274516648274239e-03 1.5210636679857458e-02 1.7851435129151771e-02
759 7.5606220596609493e-03 3.8794675045790888e-04 6.8325499699891987e-05
762 -5.8215820257473209e-05 -1.9806648145524741e-03 -3.1098270995768293e-03
764 1.7287487249717754e-02 2.9243068508963011e-02 -4.6354378670751154e-04
767 -4.6674939780232545e-04 -1.4299044952232577e-03 -1.9012439201624567e-02
863 1.1244519753667567e-02 -1.9214565799021793e-02 1.2296583818180822e-02
873 -2.9262464012833785e-02 -1.6881772784411029e-02 7.9814028579054518e-03
874 -8.4082057325683048e-03 5.3770313932088726e-03 -4.6363488845355726e-03
871 5.0492918320109289e-03 3.4709785125722494e-03 -5.2795676813333046e-03
872 1.4714173194602668e-04 6.1395909899272143e-03 1.8305518359973291e-02
758 9.3536643099019490e-03 -5.4705632228327600e-04 3.1341826732092428e-03
755 -6.8151490605346536e-04 1.6318737547381203e-02 1.1699864612782079e-02
751 -8.8987473290966061e-04 2.4248179056957711e-03 1.8146980044883292e-03
756 3.1728720424265520e-02 6.5576459660585563e-04 1.2288655321451214e-02
752 7.5713390076834880e-04 -4.3641052074995081e-03 -7.1104565874044315e-04
858 1.1634577787011931e-02 -2.3474743489781565e-02 2.3301996773139363e-02
731 -1.4302480580528657e-02 1.4958664331931092e-03 -2.8607762082600661e-03
735 3.8390858515239342e-03 -1.0037200860436881e-02 2.0644143429387196e-02
750 7.9193418626338080e-03 1.0111754972586807e-02 1.1784313220832770e-02
754 2.2788331427584236e-03 -8.0161892689168464e-04 -1.4102049537611499e-02
749 1.5248439719776389e-02 -3.5352605629567278e-03 -1.7034155930483906e-03
748 5.6951308598110755e-04 -9.9619119859485575e-03 5.3074512515403557e-04
753 1.5718343167199927e-02 8.9094847067665312e-03 1.2025033035124436e-02
757 -9.3947667080437613e-03 3.9057124258958895e-02 2.0494524035325826e-02
859 3.5108651697339692e-03 6.9245291513479346e-03 1.2551346608897160e-02
861 -9.3065651616046907e-03 -4.5147665347439149e-03 8.4369135008158808e-03
742 1.0992023332480277e-04 1.0653271095215024e-02 -1.0254312506484118e-03
737 3.0382659307659570e-03 -5.2863641591560113e-03 1.4806483674399606e-02
732 6.4183806763323595e-03 -1.6657725409640212e-02 -2.2259520281869810e-02
733 8.3909362402358380e-03 -1.5053116480742265e-03 -3.6912949127154214e-03
736 2.3196223638101343e-03 -3.9896246573834816e-03 1.1306771175750636e-02
745 1.4720085044021921e-02 -3.1650758849937830e-04 1.8689395691177367e-03
740 -8.9882605976461980e-05 -1.3909093968914039e-03 6.9252598337392413e-03
738 8.7445737127020851e-03 1.0389013330672360e-02 -1.3003130126002377e-02
862 6.4110637521609497e-03 1.0416159213150371e-03 -3.3828346206648532e-04
864 -2.2123566161854860e-02 1.0626029400185534e-02 -4.9125311205930819e-03
867 9.5544048288981548e-04 1.6205528181780542e-02 -1.2527842713275466e-02
865 8.9184393231208827e-03 -1.3650944198491865e-02 -8.5019168120895993e-04
744 -6.1725100805354880e-03 -9.4785773640526667e-03 1.0726333563336540e-02
739 2.3969540959132610e-03 1.3775150007473717e-03 4.4617563340804143e-03
746 -1.2120627868964255e-02 -1.8061536199249372e-04 1.0298669126340107e-02
729 5.9964048416817807e-05 -1.9631067940920808e-03 -4.2632924098185742e-03
815 -1.6045592690160211e-02 -7.3013903093180578e-03 -6.9216085082953859e-03
818 -9.9880916752186316e-04 -1.8680396941245309e-02 -2.2951481833870479e-02
813 7.9745913399972661e-03 8.4477025626520600e-03 1.3852938505861438e-02
816 3.7415555102864192e-03 2.7412492204227423e-04 -8.9457426583630009e-03
819 -3.6812141555107841e-02 1.0679388493785020e-02 2.5641900240631840e-02
721 5.6992631190504461e-02 5.2115611169955091e-02 -2.2412038691576510e-02
817 1.3252530741582128e-03 1.3074975757142879e-02 -1.8617224159046156e-02
708 4.2055584905393035e-03 2.6561530214788936e-02 1.2674214166957498e-02
785 8.2638739017379722e-03 -4.5580805958793979e-03 -4.9065362865766057e-03
784 -1.0159954870862397e-02 7.2996259041153738e-05 -4.0952278426426257e-03
741 -5.3430419788458583e-03 -1.6726055923199246e-02 -2.2849112394973921e-03
814 -4.4105443197457773e-02 2.0912675242382189e-02 2.9139645929952860e-02
790 -1.1360959797268319e-02 3.0466612884524489e-02 -2.4840242998641431e-03
726 -1.8535612975857815e-02 -5.2199116506682110e-03 4.8731187028824077e-03
717 -1.6269810539292109e-03 -1.7212343520832937e-02 -2.3085577540340324e-03
723 1.6138184515467887e-02 -1.2531825073273193e-03 3.7444585846601714e-03
722 -2.8231580146926777e-03 9.2834633438968178e-03 9.3274936794023947e-03
720 -1.8551381442943070e-02 2.1532376846022529e-02 -6.4787183544630332e-03
719 3.0735048994918845e-03 4.0035140663846700e-03 1.1705194314055637e-03
716 -1.1099484007703388e-02 8.2461998548903487e-03 7.8376193196892964e-03
725 -1.3257127999654991e-02 3.0291133774218181e-03 2.1957159929986690e-03
727 1.7522374017718095e-02 1.8664288025476646e-02 -1.6487084934516359e-02
728 2.1700436950703700e-02 -1.4254395126863875e-02 4.3524980333691882e-04
724 2.1851034039667257e-02 -3.1654827097717789e-02 8.2738081756124175e-03
718 6.5989868716514188e-02 -2.4439167402813877e-02 -2.4952019894293038e-02
837 1.8394136727947066e-02 -1.4322043967631223e-02 -1.0774381717961754e-02
743 1.3862495268081945e-02 1.3553884618053192e-03 1.1833194633249786e-02
747 1.6970678563446293e-03 3.0508043835181527e-02 1.2018691205149966e-02
820 3.0969554621447454e-03 -1.6963906453292543e-03 -1.3910556823228566e-03
824 -1.0137247323487432e-02 -1.2560371498996291e-02 1.4008059877574620e-03
823 8.7453190446173430e-05 8.2144495863367591e-03 7.2383769726423143e-03
821 6.0006182320902759e-03 7.0112187738767444e-03 3.1136229001742771e-03
826 7.0762537848061812e-03 -1.3555819956935156e-02 2.1185404200319058e-02
822 -1.1342849657316472e-02 4.4460544386052446e-03 9.7153462486352527e-03
825 2.6999517288089570e-02 -6.7280585530564041e-02 -2.1417752768337066e-02
810 -2.4984917709845568e-03 1.7849680904076799e-02 -2.9961014094591126e-03
811 3.5007683981428755e-02 -2.5666558089134928e-02 -3.4932753507427416e-02
812 7.1960906779044058e-03 8.5694540702818539e-03 9.6711301746450658e-03
805 1.4917730718811356e-02 -1.4141879577963016e-03 8.1279884062798752e-03
806 3.1673042670111815e-03 -1.3466170172409192e-02 -1.5306470896183439e-02
1054 2.8102395447997346e-02 -4.4111411063006173e-02 -2.9119143815575916e-02
596 -2.3285403313166059e-02 -6.1623246796279219e-03 -4.3528238391774457e-02
637 2.7615082952158376e-03 -3.9822986416398060e-02 -2.7560908709848729e-03
630 -1.2224606559482890e-02 -5.0182985560721352e-04 -1.0182076923110959e-02
628 3.5602867185850094e-03 -9.1786351025552465e-03 1.5347035284291613e-02
622 -9.0795781274041439e-04 6.8030260058627792e-03 -1.0057361179681578e-02
624 -2.6594392371886860e-02 -4.2205662966555119e-02 6.4751158850728761e-03
620 2.2057950959091174e-03 -6.4536755168854024e-03 -4.9279071162807546e-03
619 3.7230252169334101e-03 3.7611024334749444e-03 -4.8046602300519294e-03
621 3.5740076162432549e-03 -2.8414952479129618e-02 2.8544500550485057e-02
625 -1.5061720284962640e-03 2.8087474243802526e-03 1.4744769753876931e-02
623 -3.0758197838887738e-03 2.6823120426487018e-02 -2.3840991263815104e-02
626 -1.8652427160862309e-02 -3.1912944664821648e-02 -1.0502939527905403e-02
627 -1.4292161068949141e-02 -3.2534910799862350e-02 1.7952354725468023e-02
633 -5.9776258041315403e-03 8.3225956085681927e-03 -3.8607949374846497e-02
629 5.9561354226572119e-02 -3.3358341577189671e-02 -9.2411969640143529e-03
617 -3.9474653106530179e-03 -1.9489647201320529e-02 -1.5210591405452297e-02
616 -7.6899534563783936e-03 -3.0781386251594526e-03 -3.8813898605267487e-03
618 1.8592749182676883e-02 -1.4569164870892401e-02 4.8838579966802818e-02
610 -2.1013960512321845e-03 7.6895401956339352e-03 4.6537250383316226e-03
613 -4.4497080777364017e-03 3.8407854485684643e-03 -1.7193420722130245e-02
615 -3.2694186170418513e-02 -5.2135286865188819e-03 3.9058014899477189e-02
612 -7.4330102873102670e-03 -8.7174624896610236e-04 1.0888098206005645e-02
614 4.5499004209285706e-03 -4.0259558035782884e-02 9.2975225103823275e-03
609 -1.0008535647045416e-02 -4.4222987284912984e-03 -2.6426472036551333e-03
605 -3.2787617660236653e-03 6.6487075726445691e-03 -5.3269390134591896e-03
604 2.3166442569005426e-03 -4.4086196770420881e-03 -6.6380816594971250e-03
606 -4.0466389856712390e-03 3.0421851879363243e-03 9.3048421080023792e-04
603 -9.6470216991777873e-03 4.1815427967184281e-03 -2.0443033645391887e-03
608 -5.7205367621030777e-03 -1.6483807151286754e-02 -3.8942234687557233e-02
540 -9.0107993762347238e-03 9.6735762478872053e-03 1.1387557374255943e-02
541 6.8078345024343437e-03 -1.0504283226480209e-02 -4.0208521414651484e-02
536 1.9768094200140369e-02 -2.5395923887791008e-02 1.0515348609071981e-02
538 3.3939994641333085e-02 -9.7793952553884133e-03 2.1665740113691923e-02
542 -1.8659041911512575e-02 -8.0593649072883168e-03 2.6331600576122421e-02
537 7.7054904182367471e-03 -8.0662932200067938e-04 3.5063133616227678e-03
535 -2.3848936235803518e-03 -6.9759972524897234e-04 -1.1954483171404080e-02
534 -5.5819359933658224e-03 -4.6370281546924633e-03 -9.0970582663947048e-03
649 1.6689013721499957e-03 1.0100167485811416e-02 7.4853781666581638e-03
645 1.4611356965039993e-03 1.9371757301806193e-03 5.5603353250714129e-03
642 -1.3775890238146104e-02 -1.0505550772899599e-02 9.6868677322673911e-04
647 5.1038467878822390e-03 -1.6940375286429079e-02 -1.0568808785459963e-02
644 8.2651056343780067e-03 3.2410989433177113e-02 2.4368320353334023e-03
656 -1.0613274653739802e-03 2.2506670230521716e-02 3.2683997637052756e-03
655 4.3208356102360700e-02 -4.2090858971204747e-03 -4.3533287268114323e-03
648 -1.7281986619217281e-02 -9.2975707529693689e-03 -1.2129632596126254e-02
641 1.5209559360639759e-02 -3.4503591235261460e-03 -3.0268918625680060e-03
653 6.1899133995731367e-03 -4.4741794838939241e-03 -1.2114945701873095e-03
643 2.3655202641463839e-04 -1.2117027564597921e-02 -2.3418274184400789e-02
640 -1.4592701317087989e-02 -1.0297832894001780e-02 3.6114333478835053e-03
545 -4.9311255101373115e-03 -3.2978898017087199e-02 3.0537489833134202e-02
543 4.7708559139007286e-03 -1.5060261793209835e-02 8.8332849924420073e-03
546 4.6241953234100169e-03 -2.3567647903045122e-02 -1.0041931461421620e-02
709 -5.2591828908152257e-03 6.5187468728278401e-03 -8.4715369573991114e-03
544 1.2680762804721902e-02 -1.9374544671150772e-03 -6.1105618254755746e-03
734 -1.3154115973824364e-02 8.1013647750927519e-03 3.7998370898419825e-04
730 1.2839073354327813e-02 3.3588484818929711e-03 1.0614619804624093e-03
652 1.4982121765008633e-03 -3.0460687432275566e-03 3.0694069842770260e-03
654 -2.8268992340988058e-03 1.5023681315897257e-02 -2.3511481898421537e-03
666 -4.5147384134667347e-03 -4.2293726971638662e-02 -1.9070946096895593e-03
650 1.0269508609024687e-02 -7.5093307840528385e-04 1.8197733576619888e-03
646 1.2095448859400003e-02 8.9347950380904047e-03 -7.0476991351292890e-03
699 -6.6371386753860768e-03 1.2564500579257403e-02 1.3227007333328093e-02
693 1.6018770947766087e-03 1.4292844916932433e-02 1.6859043834056901e-02
651 -4.5491312354480383e-03 -3.6424666678100373e-03 -4.4153353127913339e-03
695 3.6711466527573058e-03 -2.7035687856807834e-03 -2.3373400630694822e-03
703 -1.3759267756377550e-03 -3.9652692008294976e-03 3.4168424165839147e-03
704 4.3450477609208961e-03 -1.7779425880765567e-03 -6.4510357655509854e-04
694 1.6679160055618270e-03 -5.2685723670662871e-03 4.9622244822470326e-03
698 3.8189108445364243e-03 -3.9149800125633247e-03 5.1306642303389632e-03
697 -9.2309417144178212e-03 -1.4916938861537337e-02 -4.4427168893191012e-03
696 9.7854354291031839e-03 -3.9225223434789509e-04 -3.3590312258661025e-03
657 -7.3395271057223824e-03 -6.6787351523715961e-03 -1.3861419841501538e-02
662 1.0638889355893513e-02 -7.9797340928619721e-03 1.7447509813219139e-03
702 -5.3403508893022835e-03 -8.0711051322283744e-03 1.5926648674371512e-02
707 8.4918859496851979e-03 -4.3801317311683733e-04 -8.4402253280383343e-04
710 -4.1219906469393960e-03 1.1757812335265881e-03 -7.4864378757884100e-03
712 -6.3592825993431055e-03 -8.2164584249761387e-03 -1.0329840523617477e-02
715 4.1022551863265949e-02 2.5262788830204112e-02 1.4868249788259855e-02
711 1.3347062443799839e-03 -2.3705371573767057e-03 8.7772398379469922e-03
714 -4.8943910341161133e-03 1.9580967203735408e-02 3.7168455556154676e-03
713 1.1811527727819335e-02 -5.8891201567102171e-03 5.6316044102781813e-03
706 3.0877890304745168e-02 3.3353274310289893e-02 -2.4068417736369287e-02
705 7.8004211144542803e-03 8.7174686844738586e-03 1.5284546477312659e-02
700 3.6504157812950432e-02 -1.2951204002413166e-02 -1.8187095621217956e-02
701 -1.2927829954919029e-02 4.6354960917515883e-02 -2.1212313393677285e-02
595 6.1383949560798977e-03 2.1881934810986210e-04 -2.2939065804323117e-03
597 5.6579491399259205e-03 -1.1231395185415086e-02 7.7235579689601879e-03
601 -2.6875607812827072e-02 -2.4290456597502872e-02 4.4542433325846870e-02
599 -3.6906007642445324e-02 8.7487494763308551e-03 -3.0817808629258286e-02
600 1.1461713914365110e-02 1.1697949892678706e-02 7.2865042703085491e-03
598 -9.4671960396796716e-03 -3.1251293234820384e-03 4.8920456369152049e-03
635 -1.6165457282767044e-02 9.6561888656769099e-03 2.4084456487783608e-03
585 -2.0038555446202828e-02 2.9632544523884832e-02 1.3147376760415384e-02
580 7.7110526490384579e-03 4.0789038973479555e-03 3.6188403435112885e-04
581 3.6995828842203086e-02 -4.2984394933922501e-03 3.4078817617716063e-02
591 -5.3581151191407403e-04 1.3178151300203505e-02 -1.8144456461285756e-02
594 -1.0009601965532711e-02 2.7207499292731495e-02 7.7904658178082117e-03
589 -4.5355464210604934e-03 6.1002457117833283e-03 -5.2146972005045488e-05
590 4.8207930616514898e-02 -1.2160063013447480e-02 -1.0206024633089762e-02
592 -7.6282803154083655e-03 -2.0397431183770760e-03 4.0392482906834653e-04
593 9.1849525336228401e-03 -1.3686252819254485e-02 -2.3317771061500840e-02
582 2.9884495548483745e-02 4.1190752413351218e-02 6.5942436155114756e-03
584 2.9852273214493720e-02 1.2621775665278129e-02 2.1223750186638387e-04
587 1.5331660826645494e-02 -4.2981518302967363e-02 -4.6203903486420627e-04
583 -5.1227463062527281e-03 1.8403742501328414e-02 5.9841383935690471e-03
586 7.4949382452225224e-03 -1.0844959345107665e-03 1.0974641763016159e-02
588 8.1949679755900767e-03 -4.0680349205849354e-03 -1.0128754171702684e-02
578 -3.2922700970340057e-03 -1.3929424652140695e-02 -5.4143724713589343e-03
577 -2.1427418383351006e-03 1.1283495780238817e-02 -4.2887323581946121e-04
632 2.0378462997298803e-02 -2.1280782469002571e-02 -6.4269330363008166e-03
636 1.3225540193262766e-02 1.3780178771547280e-02 -6.0660029097945613e-04
634 -4.3059268549823070e-04 2.6170191203452623e-03 -2.8071565179757763e-03
631 -7.9541944515167141e-03 6.6187342881530529e-03 4.4099806900003129e-03
579 -1.2353351600096358e-02 1.5986185435535372e-02 -1.2638525645596142e-02
573 -6.9998894767281114e-03 6.3647842293186444e-04 -1.9250670579140913e-02
574 1.5415568955672894e-02 -3.0294112611268909e-02 -2.7423277811485730e-03
569 1.4298706750238293e-02 -8.5452543047801355e-03 -5.8831477887033752e-03
519 4.2006533642325955e-02 -3.5567892897175428e-02 1.2337818341349129e-04
515 6.3809961734139766e-03 -3.4299299551360800e-03 -6.5171536509308322e-03
514 -1.3993293937187653e-02 -6.6378465589811246e-03 1.3044097610493961e-03
518 -1.0146278794911754e-02 -2.1991410940587309e-02 -5.9708106261024034e-03
513 -6.2839526213325520e-03 6.3421957212760650e-03 2.0977539717586453e-03
611 2.1395452790804372e-02 2.4568402530263391e-03 -1.3287298892858011e-02
607 -6.2173436593423925e-03 -8.2884291138899235e-03 -2.5554284942633256e-02
602 -4.5816076805589596e-03 -4.1463511953526433e-03 -2.0738810008070437e-03
572 -4.1730183215772959e-02 -5.9379631433160770e-03 1.2204234137604453e-02
566 -6.8297837880370244e-03 2.9850584009837116e-03 -1.4868225127856662e-03
560 -1.0833502235803660e-02 -4.0662660383729609e-03 -1.8705488708150365e-03
555 6.5004284178940873e-03 -4.1593343540390236e-03 -1.3741528882156824e-03
559 4.6928665361688059e-03 -1.0507178102447823e-02 2.9367022538114448e-03
558 7.6880295694428035e-03 1.1256989741189711e-03 -9.1894466619302593e-03
554 3.9566975401468399e-03 3.2652035908672088e-03 1.3902301605482378e-03
576 -6.8514536474229126e-03 -3.1971033342161987e-03 -1.8867913604950023e-04
568 -3.1651009808842936e-03 8.7285042175401541e-03 -1.3274055343445784e-02
567 8.7323019069412468e-04 -4.0351090082887025e-03 5.5131819586683971e-03
575 -2.8438326277179408e-02 -7.8457411075409114e-02 6.1824493295611925e-02
570 6.5442928043909767e-03 3.4511614382955625e-03 1.5157882418767887e-03
571 -3.4719115559159351e-03 -1.8716859375399433e-02 -2.9404881840406098e-03
524 -1.3974946921727278e-02 9.2350815333423191e-03 2.6409962201263321e-02
539 8.4883249462916512e-03 4.3814412413415507e-03 -1.4674054008820487e-02
533 1.9117688687154147e-02 1.0202125829602336e-03 3.6022539898539615e-03
531 1.0651601296216439e-02 7.7290167542719635e-03 -9.3956305907551413e-03
527 1.4069168314988983e-02 -1.6763615482200341e-02 -9.5310449061668853e-03
525 1.4939472775599362e-03 4.2074668236248584e-03 -8.4184615974493878e-04
521 3.9566037335017632e-03 -7.3933897736584656e-03 -5.0318742759366672e-03
522 3.3217079501797484e-03 -4.0432161142458485e-03 2.3878077253476938e-03
526 2.3604682658529058e-03 5.6534655323352600e-03 -2.4281154672717672e-02
682 -3.2595681880417803e-02 3.8189469286946887e-02 -8.1812274566404625e-03
563 4.7707073770939974e-03 -2.2971371033214394e-03 4.0360011603053627e-03
529 -1.6207824618765529e-03 -6.0429841534072413e-03 -8.3278824620593075e-03
532 2.9525576124601917e-02 1.8791464862234198e-02 -1.1300609367862162e-02
528 1.6470954990809125e-02 -7.4054505687944500e-03 3.4624985844466474e-03
530 1.3872875747031010e-02 -1.1945578160536305e-02 1.4995579648883055e-02
556 -7.8916769822947761e-04 -1.6411110958709347e-03 -3.1194417579690388e-03
638 -3.9741803631744696e-03 -6.1155306506276352e-03 8.4658341473949020e-03
639 -1.0870221538015416e-02 4.7406290295883427e-03 -3.5283202674128919e-03
561 7.8148951135795265e-03 9.0441088822917747e-03 -6.4779210266502404e-03
562 -9.1707956928613263e-03 1.6448642176186659e-03 8.1680880911137507e-03
557 -8.5427997222551060e-04 5.0939757939307316e-03 -9.9081591938581289e-03
564 1.6711482546592565e-03 7.9721976734632282e-03 -1.3636161955616632e-02
565 -3.3954973384379278e-02 2.1753538470323498e-02 4.5405375375575388e-02
669 3.4909427544916709e-02 -2.8829697688625274e-03 1.3221726476892539e-02
668 8.7851003600823048e-03 -4.3264577642798995e-03 -5.6602077608484194e-03
670 -2.6867066570098312e-03 4.4758025413750699e-03 8.5934451409734446e-03
671 -1.5381022084551030e-03 -1.3936570241401788e-02 -8.3690933601849298e-03
675 -4.9193207374529323e-04 -3.0723484255634052e-03 -1.9523434555810001e-02
672 2.9026635919311181e-02 -3.1604801605404995e-03 -3.0225393206163371e-02
523 -7.5187538755069052e-03 -5.5093476485700201e-03 4.0219278005435470e-03
673 -2.8677423851509613e-02 1.2627232008470771e-02 2.7725938213953982e-02
676 1.2573760053036405e-02 1.6519720618954202e-02 -5.5244438640056747e-03
674 -1.7038000879610826e-02 6.4403522060363120e-03 4.6413570190624830e-03
665 -1.5966630548773314e-02 5.0637850460302128e-02 -1.1410230320296843e-02
664 -4.2592620433993852e-02 6.2851767067324338e-04 -1.2472669231625938e-02
658 -1.1223865901808253e-02 8.5404224337797246e-03 -2.8378260062097141e-03
663 -1.2192102090450069e-02 1.3798047616490328e-02 -9.0781656635863673e-03
661 -1.4783863682786898e-02 -9.8324732787176275e-04 -1.1563685637742575e-04
660 -3.3521820439396249e-03 -1.0200664113098832e-02 3.0312551878369288e-03
659 1.2595112264995214e-02 2.4431830885526702e-03 1.1142567612502036e-03
667 1.8188277919995886e-03 3.6924200917563127e-03 -2.4756568147026054e-03
490 2.1299596188669303e-02 -2.8147302914472171e-02 -2.9271678149837166e-02
486 -7.5952633815319333e-03 -1.3526897742637105e-03 1.3406190975421868e-02
482 3.8535047802611615e-03 5.0959649455848922e-03 -9.2498982138355182e-03
485 -1.1523541850230965e-02 6.2873641738248852e-03 4.5860594311984632e-03
516 5.9272440330092185e-03 7.7695251989886912e-03 1.1119162951888743e-02
511 1.0911740195991620e-02 -4.5931650482047696e-04 -3.7249805079136258e-03
512 8.2153010599094762e-03 -4.4066366444036609e-03 5.4597212607286408e-03
481 -1.9794295483449732e-03 -1.5655866890719843e-02 -4.2023164260221402e-02
520 3.7152717473562212e-02 -2.0921297936969171e-03 1.3722345996710638e-02
469 -5.2679520871356644e-03 -3.2508224437375918e-03 -1.3163705323359176e-04
464 -1.4404277452295446e-02 4.6163678372477934e-03 -1.2896752929148920e-02
479 -7.6815700110601376e-03 -7.1900725999258647e-03 3.8112377325325410e-03
483 2.7612110512776008e-02 -3.4711036159616085e-02 -6.3100069123442834e-03
484 -1.3119755441027690e-02 -9.4344243121398681e-03 -1.5543822336216912e-02
477 -1.7702988963337123e-03 -5.9676235580187796e-03 -1.2367085332020500e-03
476 -3.8402333713237935e-03 5.2191594627404726e-04 -2.5613632976615938e-03
478 1.7733532363874314e-03 1.4065327886089368e-04 9.9677766720006004e-03
475 3.8941707577976081e-04 -1.2053918569296635e-05 -2.5695975497517054e-03
480 -1.3890177071769942e-03 1.8045145324319673e-03 -6.7166386358770451e-03
463 -6.7063213005472367e-03 3.0112437607826407e-03 6.6907525169521002e-04
468 -6.5246632687367368e-03 5.6881916766833790e-03 8.7247787375946025e-03
547 1.1600204541175553e-03 1.3612300256934176e-03 -1.1880679945460021e-02
470 -7.2650637658569070e-03 1.6162495294091092e-03 -5.5566143288450377e-03
472 -8.3776728177679307e-03 6.6939268546772606e-03 -1.0012718366546661e-03
548 2.1348460054427905e-03 -1.6756268421982332e-02 2.2272313694868479e-03
474 -1.2185590921951900e-03 2.0447938014315221e-02 1.2588491512259986e-02
471 -7.1350767771683511e-03 -1.7470652738641387e-02 9.1678507329305027e-03
467 2.3287531127823844e-03 8.3761595700091796e-04 -9.2271579435494501e-03
465 2.3635073833256103e-03 2.7827611024674152e-04 3.7576569213420351e-03
466 -1.1134720440353152e-02 -2.0286904632749224e-03 -2.4743279802139700e-03
491 -2.5275817147519483e-03 3.7207576192274769e-03 -9.5904357264133804e-03
489 -2.5365378172377308e-03 1.4372014687301664e-04 -3.1664151472083810e-03
488 -1.8513309919283030e-02 1.5234721503437604e-05 -8.4460081194311272e-04
492 8.4670274138065518e-03 -7.9994809296110893e-03 3.4017671954311829e-03
494 7.2490857157279289e-03 -7.2760505748457414e-03 1.9019817688156731e-02
495 2.1799494346318084e-03 2.5691918689386079e-03 -1.5282074362372323e-02
498 1.5830407339954746e-03 -4.7035444285920920e-03 1.8619961517218930e-03
502 -5.0094776588254491e-03 2.8227043769133895e-03 -2.2860735257247501e-02
503 -1.9161898270620287e-02 -5.0039278770451737e-02 2.1011929782156061e-02
501 6.7574833704999636e-05 1.8116186018392027e-03 -8.6959443861481696e-03
497 5.4978743411929966e-02 1.0312992440758654e-02 -1.0049748426467886e-02
496 3.3383411522484902e-03 3.1302013104227075e-02 8.8304186563143514e-03
499 -7.1314154130633009e-03 -2.3408230886411176e-02 -7.5310661760936183e-03
493 2.8905542920990127e-02 -3.8808921423618623e-03 2.9036787347604476e-03
500 4.7731989941642024e-02 1.5776678571702975e-02 -2.8331530064058820e-03
691 5.6390436558106786e-04 -4.3074860612992878e-03 -1.9944514205773950e-02
689 1.6849978168481310e-02 1.1870865487785445e-03 -9.2666671734284098e-03
690 -1.3785389167701046e-02 2.1132958963709633e-02 2.3348610910863019e-02
487 -1.1920101158725461e-02 1.6140415691324978e-02 -4.1622507024297439e-03
517 -6.2167730664016855e-03 2.3464408649881544e-02 -9.3882127182591084e-03
685 -1.1206206253524703e-02 -1.6629126095934608e-02 -2.1447150558569342e-02
681 6.1500453057497387e-03 3.0456076022203602e-02 4.9971336375549943e-02
692 3.4708433266403362e-02 1.5741106610502542e-02 -2.4126810547270103e-02
686 -6.1957289289959585e-03 3.1974250475683046e-03 -1.1106121503377225e-03
688 -2.1849394419448442e-02 4.8687863752656740e-04 2.0799757056208346e-02
680 -7.1709663352790189e-03 -1.1856653300765191e-02 6.6389606096808858e-03
683 -1.2218397315519392e-03 4.5630070778986597e-03 7.0804994344905833e-05
684 5.5108791050854132e-03 -1.3052278430366406e-02 -3.4974772325628519e-03
679 1.5258470474261685e-02 -4.2741222728400877e-02 5.4820627962347901e-03
678 -1.2729585633429945e-03 5.2240232736902011e-03 9.7875663956267026e-03
552 -1.9188230654906453e-02 -1.4595750141401399e-02 1.1025297204836611e-02
549 3.2797844539538424e-03 7.0502002886600286e-03 1.7116246304402611e-03
551 -7.3895189995246309e-03 1.5904083891560706e-03 1.0145783427072858e-02
550 8.1906614873580852e-04 5.1227835673741456e-03 -8.1921290334971541e-03
677 -2.1148887319342665e-02 9.2990942220129488e-03 1.6777735949031550e-02
553 -4.5220900653527083e-04 -2.2105600898071256e-02 1.1248103709388644e-03
506 -1.1825590162310167e-02 -5.5462020419178104e-03 -6.9706982282258306e-03
504 -1.1304587146365052e-04 -5.3344940564597314e-03 -6.2185127702140443e-03
505 -2.5439786238874232e-02 2.0032851285394063e-02 2.3743669544222225e-02
508 2.1678861650118172e-02 4.1934339034396577e-02 -3.1032291997802240e-02
509 3.0156614059348358e-02 -2.6461354449094018e-02 -3.4685023028207952e-02
507 1.4268365880681862e-02 2.5799338617831075e-03 -2.8927112844491753e-04
510 2.6515997394915156e-02 -1.1250106383050039e-02 -2.2853961429795212e-02
687 7.9650348399801056e-03 -1.1449937400897088e-02 -5.6342269327777873e-03
375 -2.0835098204513348e-03 1.2606128680953486e-02 5.0848198479972418e-03
429 2.0797793265139603e-03 2.4414405785657008e-02 -5.6461142511729132e-04
378 -1.3850320045385280e-03 -1.5780475460123568e-03 3.3112281431902399e-03
420 -1.9258960016123247e-03 1.5127367832744138e-03 -1.0509367431793246e-02
376 -1.2858051914953938e-02 2.0443615530065270e-03 -1.8504665146785290e-03
373 1.4294113857017890e-02 -8.0718378144690166e-03 -7.8331877528886283e-03
381 3.7282365221850558e-03 -5.9691599547156437e-05 -5.0971048296794266e-03
425 1.3268247565009708e-02 3.8280011629859712e-03 5.4528158566324635e-03
428 -5.2920260075099796e-03 -1.6936887621303636e-03 4.2803578280893213e-03
424 1.3408203344259099e-03 8.7235195352981954e-03 -1.8936834466700288e-03
423 -4.1637455909060011e-04 1.0396423983777960e-02 6.2162885085209976e-04
461 1.7642203251720289e-02 2.1283761098179962e-03 4.1345159010949213e-02
462 -1.1337681228893487e-04 2.4202464625744005e-02 -1.6540259807029778e-02
459 2.0143827668380899e-03 -1.3349596428087584e-03 -2.2800888519874255e-03
458 -7.6535306828564315e-03 5.1304732190078552e-03 -6.3947629811255654e-03
383 -1.4108129829496014e-02 1.9847060661071728e-02 1.6589681056219979e-02
380 -9.4856817677134251e-03 5.4582408847491165e-03 8.2452983604906511e-03
456 2.2008898320099875e-03 -2.4806094880917900e-03 -3.1608522607929606e-03
460 -1.6155101699439765e-03 -7.5912990354568520e-03 -4.3481264897539448e-03
457 -5.1367093313715775e-03 1.2638087463943115e-03 1.0670379023166915e-02
473 3.1324517307572783e-02 -9.9391628413960011e-03 -3.7205143965009076e-02
379 1.0221712265897232e-02 6.0949272083207530e-03 3.9145509151776482e-03
377 8.3452180636378170e-03 2.5914387544126679e-03 1.1668351881781478e-02
427 2.3161145179730258e-03 1.9085768765765322e-02 3.1900162229444168e-03
421 5.3319714996856481e-04 -2.5336328335091858e-03 6.1864446761016240e-04
422 -3.4683432421635622e-03 -1.5477095759592007e-03 -1.1712665158514156e-03
430 -9.9179390991032644e-03 -6.5937720091346552e-05 -2.8324858740078644e-03
426 3.2731667744114630e-02 2.3731369233867781e-03 1.4492929559205047e-03
432 3.4089384568725241e-02 3.9937666742416347e-02 1.9621208029491296e-02
433 1.2959377971019606e-02 2.7787907584119311e-03 1.6500932297484029e-03
442 -8.1590596429113819e-03 -3.5085045858431307e-02 2.2432925382040982e-02
431 -8.4447458788527736e-03 -1.5788337853014809e-03 -3.7810311316056199e-03
436 1.8513117385266193e-02 -2.2470924358142401e-02 -2.1158569145158113e-02
434 2.3353456297619340e-03 -7.4743396461705285e-03 5.3124920337130023e-03
440 -6.7432517494973162e-03 -2.7745352673550047e-03 -8.3756853639038835e-03
437 -3.9866980290508870e-03 4.1908403941302670e-03 2.4065552614789036e-04
438 -4.0668934446702340e-03 1.6367989376729817e-02 3.1199074492756873e-03
435 9.4251892149657349e-03 1.7631677770893653e-02 1.4243942649591525e-02
441 1.8083922631389238e-02 1.2479284128018409e-02 -8.9925107993990509e-03
439 -3.2792612875788469e-03 4.0609423814602662e-02 7.8774181750129763e-02
320 7.8941718081624347e-03 3.2799761246236250e-02 2.5912413734855855e-02
326 -3.1932508593101082e-03 -8.4048345705567580e-03 1.6286859141319329e-02
322 -7.7399122468089958e-03 6.0248949227274806e-03 6.0612195734983752e-03
323 3.2612242082299382e-02 -4.9504571216334716e-03 1.5062578639440528e-02
319 -3.6126248149790830e-03 7.6972740249075088e-03 2.7099877743325964e-04
321 1.8862175203731974e-02 2.9450782440683797e-02 -2.5561884770011548e-02
308 1.9358597353830154e-03 -1.4870627053119950e-02 1.1601169227711433e-02
315 1.6797922686026822e-02 2.4158044046954100e-02 6.6566858221067324e-03
314 -1.7232096700700136e-02 3.0112933488561051e-02 2.7871650504111840e-02
396 -1.5772150507817656e-03 -3.2821465102104741e-04 2.4063303274754574e-02
402 3.4626969376770930e-03 -2.3759589229724455e-03 7.3953722817923567e-03
337 -2.3534084347529655e-02 -1.2578766287429599e-02 3.5799877841414966e-02
333 -2.4404363690925337e-03 1.1662394617744257e-03 2.0645207000723606e-03
336 -7.1749182209290578e-03 -1.1467167602810002e-02 -2.6095068267416307e-02
332 3.1049697308042378e-03 3.7599244913201989e-03 4.1482798330675372e-03
338 -1.6775017848678454e-02 -1.1041646851067071e-02 2.6791679135665845e-02
334 1.5370016756525518e-02 -4.7930558838625631e-03 -7.3928741642087957e-03
329 -3.0172025090255739e-03 -7.6069820958202163e-04 4.9602516990344915e-03
331 -5.1831270980215892e-03 -9.9804767357756594e-03 -4.5304032571983569e-03
365 -4.1764535797229815e-03 -5.3310526706206915e-04 1.8803913327795907e-03
382 5.0065316585692762e-03 7.6955229191374179e-03 2.8135058235360156e-02
330 -1.6458102943211577e-02 -2.2801489638202936e-03 -1.2861030713022491e-02
287 6.4040345626246616e-03 2.7754465443415289e-03 3.1774687956657669e-03
286 -3.8159747495470787e-03 -4.7763810109153733e-03 -3.9786880154817081e-03
290 -7.3783899408895069e-04 7.6953385083559367e-03 -9.8698628435045042e-03
390 5.9449669325758649e-03 2.8498292161140042e-03 -1.3066400387686404e-03
366 -1.4856408530347074e-03 4.0234372377388923e-03 -1.5815997486662414e-03
367 -1.5687694110440471e-02 8.0452901525575691e-03 2.1150290340312249e-03
400 -1.5101021942481481e-02 2.0904120322813951e-02 -5.7741962064751448e-03
374 2.2786932509786381e-03 -6.3506222070882218e-03 6.0905857431675300e-03
369 -2.9008332922249398e-03 -3.8156913723857142e-03 -8.2270779392847621e-03
368 6.1469705583594107e-03 1.1490064759545287e-02 3.7217539884067956e-03
372 -4.1112964280941760e-03 4.7542074433138872e-03 -6.5356709125319237e-03
370 -7.8790653548605240e-03 3.4671094733206868e-03 5.9848851041233060e-03
395 -8.1853086134299341e-03 7.7669406453088376e-03 3.3165649560330224e-03
397 1.7662348724202990e-03 4.5589720642906360e-02 3.4283258801742302e-02
398 -1.5980942894327336e-02 -2.8970109103246431e-03 2.5813057134150292e-03
399 1.1891584284377064e-02 -2.7625646700394177e-02 2.0085825325625681e-02
385 -4.2948593366804366e-04 1.3816876984815443e-02 1.1447017110949168e-03
384 2.0973532848204385e-02 5.7032169897154239e-03 -1.0554731684809139e-02
371 2.3676328224922397e-02 1.1350704265457107e-02 3.4677272282617466e-03
288 7.6499312427259888e-04 -1.1880565654735747e-03 5.1514724840674622e-03
289 -1.3937623633702616e-02 2.2668126525469427e-03 7.9121397736331282e-04
292 4.9196589745060830e-03 -1.3247905551082847e-02 2.3996703764569392e-02
401 -1.2381837501600210e-03 -2.3249803329526502e-03 1.0805134540381518e-02
394 -3.1613040092172162e-03 -4.1442802555208364e-03 -3.3307347380928410e-04
386 2.9532401421423120e-03 -8.6312677156093675e-04 -6.6666738733024639e-03
403 1.2020021333414713e-03 -2.0646567263600639e-02 1.3182914335729053e-02
387 1.3002445835594730e-03 -6.7054433175479000e-04 3.7724808668456694e-03
391 -2.2976572977481475e-02 -1.1458593380916468e-02 2.9186986924575737e-02
389 -1.4035715216296634e-02 -7.8730538488664334e-03 -3.5123267455247661e-03
388 1.6612079358884590e-03 3.1286381229584771e-06 4.1903946987008160e-03
392 -1.6128396482829876e-02 -7.4645775465140372e-03 2.3629701707087798e-02
348 -1.3689031823342440e-02 1.7092608502836825e-04 -5.1688983598794834e-02
453 2.5375675093260792e-02 2.9591864151824240e-02 3.0058104069137767e-02
393 -1.2118161168715823e-02 -6.7957852030573985e-03 -1.3456551537610186e-02
445 -2.3909669628821888e-02 -1.5705957860641261e-03 -1.9590832489932448e-02
447 -1.8739255904618134e-02 -5.5426131337958512e-03 -4.2164648653127974e-02
451 2.0054235896797879e-02 -1.5164744267265062e-03 -9.9957513144899382e-03
444 -2.2496781407841766e-03 -5.3847178343600253e-03 5.6701631406372403e-03
452 1.1594527912904329e-02 -4.3620786837558411e-03 1.7041604341451568e-03
449 -8.9546860621575342e-03 -5.8170982021151915e-03 -3.1420264096341068e-04
450 1.0335571121896153e-02 -2.5728894097333085e-02 2.2704884008459728e-02
446 -1.3924824624317487e-02 4.0327897853760270e-04 -1.2664692897360979e-02
443 -2.8637733368309490e-03 -3.6350145501281481e-03 -4.9324275509305218e-04
448 -2.3994362743509065e-02 5.1766627207482834e-03 1.7174518088817869e-03
454 4.4128230391677625e-02 7.5101159249707661e-03 -1.6233418690202322e-02
455 1.9357574012577563e-02 -1.8534783785436777e-05 5.2222909973805454e-03
327 1.5220740676671618e-02 2.5731722633909063e-02 -2.2967188512328009e-02
324 -4.2715775942965923e-03 -7.7978467787713059e-03 1.3638431344917563e-03
317 1.1015508831776587e-02 -4.2561839222756387e-02 1.1913580131558556e-02
318 -2.4329993775038083e-02 -4.5004883009122192e-03 -5.8412098279543502e-04
316 1.5108685842151156e-03 3.7248962937535359e-03 -2.6860481301782093e-03
325 -8.2628908752544073e-03 4.3208166314114326e-03 3.4995992474914444e-03
328 -1.5750347098441097e-02 9.1727601627674925e-03 6.1351265336726003e-03
233 9.8033492952782561e-03 2.0440399125881935e-02 -6.4458635703181714e-04
232 1.8336660254329947e-02 -1.0563697377067419e-02 1.6775859191956899e-02
310 1.3689752378640044e-02 -8.9305917288840953e-03 4.1006010465728547e-03
311 1.3476999371996387e-02 -2.1962921664516792e-02 -2.4109834454440107e-02
307 -9.7634409747465456e-03 9.3678350983167295e-03 1.6219092463930517e-03
309 1.5942457303830978e-02 1.2852045603594807e-02 -2.2896307693343925e-02
313 -3.6758992092260226e-03 1.7643959925754123e-03 2.4079583071709106e-03
305 1.2623936293414155e-02 -4.8370894026774365e-02 2.4789380561288796e-02
304 1.2107267394260565e-02 4.9829074629882924e-04 5.3009855398838731e-03
166 -3.0123475220368505e-02 -4.0887148875518198e-02 -2.9306766461658345e-02
306 -1.5943184713433575e-02 -2.1491318753102433e-02 1.5056363330980095e-02
312 -3.5975396251046926e-02 2.2328367898162729e-03 4.5159609777403846e-03
303 -4.2955588236531297e-03 6.6484643973551381e-03 -3.4335249316927471e-03
165 -2.0830491191376210e-02 -1.1434060304168981e-02 2.8630878948396010e-02
164 -5.6831157330167253e-03 -1.6164467247438672e-02 -7.5877356939526425e-04
161 -5.0120599695056599e-03 1.0261334542698564e-03 -5.8576548262447656e-03
162 -5.2263570560152324e-03 8.7117483788952781e-03 5.2589837666931446e-04
300 7.2200123647118888e-03 1.7184483289415683e-02 -2.0613628983966254e-02
296 1.1476835657875082e-02 -1.0835118569383615e-03 -2.0673035163824350e-03
163 1.1511026420966396e-02 -2.6473738277022870e-02 2.2144354192600194e-02
227 4.4942377553258001e-02 1.4047166567899595e-02 -3.2921479911671003e-03
226 -4.5629705768126416e-02 -6.0782730625036857e-03 -1.3750470064821099e-02
225 -1.0046722800877851e-02 1.4799429322769392e-04 1.6810214419123023e-03
224 8.8360257304233511e-03 1.4416093024386340e-02 2.0988119215495416e-02
175 7.6329464019224752e-03 1.3282247690776964e-02 -2.4403341147328266e-02
172 -4.3852511918265877e-02 -6.2886456543825645e-03 2.1552044418575243e-02
174 -1.5195496191002409e-02 1.8818174941886748e-03 -1.0900192427684265e-03
173 -2.1960442581719951e-04 -1.4273848327992465e-03 1.1804259789029471e-03
170 9.5366390248365664e-03 -5.5252787266629631e-03 -4.0375496933220192e-03
299 -3.7980713282193990e-02 -3.0378441018128585e-02 2.3783468168950386e-04
169 3.6620591039517855e-02 3.9422405677657108e-03 -2.7572940314437255e-02
168 -1.7245808026248172e-02 -2.6336775066328148e-02 3.0567727501679871e-02
167 7.4704417649272565e-03 -4.7924982093479774e-03 6.5093959023720255e-03
295 -5.7649776227058237e-03 1.8131943132183706e-02 -1.5747868624216364e-02
294 2.6558712761132427e-03 -5.5060364490401798e-03 -5.6994346756031999e-03
274 8.6657234599040334e-03 -2.3706473316391645e-03 8.7484983386036681e-03
171 3.2646978757658088e-03 -8.2766499164484194e-03 3.0617045241041235e-03
275 -1.7759160243579117e-04 -7.7490760611272766e-03 4.9139017250627451e-03
405 2.0359488858396144e-02 -2.6567096840159031e-02 5.4553523307383596e-03
404 -4.8482838572272971e-03 7.5139505082118937e-03 5.1298416878119328e-03
411 -1.2479948498353219e-02 -2.9973733257724510e-04 -2.1358937991268162e-03
407 2.4370707378990339e-03 -5.6106509324000339e-03 -2.7897787309589393e-03
409 -2.8966129004485718e-02 -7.5754073339241220e-03 -2.1596215356597576e-02
412 9.6865040288940298e-03 1.9227508991492517e-02 -4.5887756059301808e-02
410 4.5646344139014146e-03 -1.0637938855818083e-03 -4.7584809853834587e-03
415 3.0659904122498988e-02 -3.3806393950233306e-02 1.7730595331086053e-02
341 -4.4822019877476561e-03 9.1916341126295920e-03 -1.0486364425384849e-02
301 -4.2689478254905142e-02 7.4743985367574858e-03 -1.0773243611981748e-02
217 -1.3209797064326356e-02 3.1541146497521266e-03 -1.0196013032149325e-03
339 -2.0642123335824201e-03 -4.0600950100174874e-03 -9.8222903121920214e-03
342 3.4150328612465496e-02 2.6010991299514653e-02 -2.2437454885773530e-02
340 6.4173727524164904e-03 1.5742365001287847e-04 -4.9264441667428117e-03
335 -4.1901857560722915e-03 8.6647227789996787e-04 -3.9172308478161867e-02
297 3.5670301028803472e-03 -8.2161289773879931e-03 8.5691316133459320e-03
298 -9.6851669812374301e-03 -4.0254352784165542e-04 1.0531195359481293e-03
293 -9.7884788202162662e-03 -8.8827789944290261e-03 -5.8880967649894561e-03
302 -6.9736711309910070e-03 1.3680716106327871e-02 -1.5692262479380228e-02
282 1.1636956741307197e-02 -4.3379019805822204e-03 7.2784820851451801e-03
249 1.7151599269570827e-02 1.4366731434139685e-02 1.4624210455654347e-03
250 1.1795067641762916e-02 1.4436545262204619e-02 4.4186197977184967e-03
248 -1.1018213971381759e-02 6.2942702932349834e-03 -8.9714895619024022e-03
281 6.9043715087690628e-03 1.5285650121048668e-03 -8.3956265103015144e-03
285 -1.8498623328657919e-03 -2.0089187903378773e-03 -4.5175779295433391e-03
252 -3.5387362858737381e-03 -1.0377089063245846e-03 2.3308746552537550e-03
254 -1.9323060890595711e-02 7.2094852409785781e-03 -2.3904666459621009e-02
253 8.7543766615126323e-03 -2.1291657886476816e-03 -5.1745673054743478e-03
244 1.1149791236705947e-02 -5.1751397075474768e-03 1.8106078291564105e-03
239 7.4337590050347442e-03 5.8410495921740304e-03 -7.6059415843621487e-03
240 -5.3366489051229343e-03 -2.9278954548723059e-03 6.0668012183954295e-03
241 -7.4615750329047161e-03 -5.4742142864838235e-03 1.3309831437301719e-02
406 2.4654019601587460e-02 2.2819881345318696e-03 3.5041725409697612e-02
414 3.1816038688533707e-02 -4.8475697640356970e-03 8.9849651541617052e-03
277 -3.9471870003596060e-03 -6.6403907408672637e-03 -6.8147656784316221e-03
280 -1.8954042088111318e-02 -4.5652108558183442e-03 -2.4660333711309521e-02
276 -3.3110878736875870e-03 -4.6482415140215224e-03 -9.1456885897799340e-03
278 4.4679048864985551e-03 -1.8835633364611911e-03 2.5938954340465185e-03
283 7.1637218626908620e-03 -1.0438437133725035e-02 2.1290585625942959e-03
284 -3.1111236745058569e-03 -2.8966308555387330e-03 5.1068135445954572e-04
291 3.4067112371995948e-03 5.9300083716620350e-03 -8.9837234725739425e-03
256 1.7949135925830865e-02 2.0551537656858066e-02 -2.3104907138542661e-02
255 -1.7335556563669641e-02 1.9643988633140890e-04 -2.6376224222586465e-03
259 -2.0760610894373810e-02 -1.1011246233477283e-02 -1.1403257386050820e-02
408 1.7177598524632312e-03 -1.0919908401050291e-02 2.0528089791936602e-02
418 2.2954054285435566e-02 1.5835108144591124e-02 2.6977903638517506e-03
419 -2.3760278723187641e-02 -1.3939321016598380e-03 1.5144149266995454e-02
416 3.9024702884763868e-03 3.1437418712702628e-03 -2.2299220178509938e-03
417 -2.3246579661278990e-02 8.3817016810560190e-03 -4.1985283678874366e-03
413 -2.0256289922714287e-02 -2.1935318648096439e-03 -4.2853913089722839e-03
360 1.7425520544146467e-02 3.1419210440012162e-02 3.7981170391835670e-02
343 6.4541811319512666e-03 1.0531589878257017e-02 3.6047276769086531e-03
350 -1.4932506448630027e-02 -1.7619929263897278e-02 3.3025039111896720e-02
345 -1.9336641158548360e-02 1.6166354023018536e-02 1.5847896244504584e-03
344 1.6034536455564130e-02 -3.4508188843576405e-02 -1.5571934901617941e-03
347 -2.4945791340956324e-02 7.6208916785754532e-02 -2.6613452861149713e-02
358 2.3250347391387013e-03 4.0969430955505693e-04 -1.2535853620331071e-02
357 -1.0229097451114354e-02 1.1303374103980043e-02 3.4602110614871999e-02
355 -6.5950540073238407e-03 -3.6180028377802011e-03 -1.1370930856936226e-02
356 -1.5077640142810163e-02 1.4163534230142150e-02 -1.4122325188413002e-02
359 4.2690237472013018e-02 -3.8195933675732846e-02 -6.8178608828095991e-03
353 2.4411290228507725e-02 -1.0476947152171052e-02 -1.1304165688724171e-02
352 -8.4165044058835542e-03 9.1409926090882875e-04 -1.4498334997556870e-02
351 2.7139793374553788e-03 2.8897242451736648e-02 -1.8776510973538916e-02
354 3.5300007597059320e-03 7.7025636553390920e-03 1.5166282427623766e-02
349 1.5809791817156048e-02 -8.7594046705572366e-03 -1.5419697498313237e-02
346 1.5468328165889340e-03 1.5658339864120980e-02 -1.1102813528557073e-02
260 -1.3442427225239554e-02 -2.1716994034017001e-02 8.3321981404206880e-03
251 -2.7226830348923852e-02 9.7414508442981371e-03 1.5601872427613307e-02
245 -3.3886371902105226e-03 -2.3078186890553215e-02 -1.0993035014734674e-02
263 -3.6470518173499812e-02 1.8027050235623549e-03 1.0316799987880803e-02
261 3.1027824435216952e-03 2.5146317553863180e-03 -1.1017696789345752e-02
258 -2.5735969806024114e-03 -5.0445733052657061e-03 -7.3281628278857279e-04
266 7.2735509853044484e-03 2.3572349325295849e-02 -9.9822439079734065e-03
268 3.2383453224001858e-02 1.3275446858604609e-02 2.3584730027282143e-02
273 -1.6658191618376204e-02 -8.5040436306731866e-03 2.5364274971688264e-02
269 -1.3659488946948954e-02 3.4260172781842486e-03 8.8148741837856971e-03
267 1.6718605570931271e-03 5.4190969876371847e-03 -3.2747589984752140e-03
264 1.9150077261984659e-04 1.9447676486455815e-03 7.4708476510066584e-03
272 -1.6776626801035442e-02 3.5437221324443623e-02 1.5188249891478593e-03
262 -1.0280335858577181e-02 2.5596864033945450e-03 2.6643645406423604e-02
257 -2.3800472008175956e-02 -1.9228084921940169e-03 -2.1448108972886855e-04
364 -3.2309019074180177e-02 -9.1464166820680350e-03 1.6184373875480555e-02
362 -3.0741256329557699e-03 -1.2263157255750869e-03 1.3418986778881807e-02
361 6.7510106585317068e-04 7.3327913348297748e-04 -2.6328163990905189e-03
363 3.8596045190361075e-03 -4.2925510252016744e-03 -4.4794674568472762e-03
140 1.0234030423092507e-03 6.4979629094805268e-03 4.4070230168657600e-03
142 1.1721923554014153e-02 7.7085836318952130e-03 -8.6349215966683365e-03
145 -1.5870058898387832e-02 -2.1438324340193071e-03 -2.6902278240527242e-02
143 5.3902355640830313e-03 5.8952039982454966e-03 8.7350202872995900e-03
146 -7.7162896058623233e-03 2.7604260792176701e-02 8.9101354993150628e-03
133 1.2775171903399867e-02 -1.9661651396993038e-02 8.9855445038085791e-04
135 1.7125352646265982e-02 2.7233999994624225e-02 -7.3063450192217246e-03
134 -9.0776154310834075e-03 -5.0898461709391056e-07 -4.1791134935244122e-03
132 2.1626483624189248e-03 -1.6564449216871252e-02 -1.1050052534099214e-02
131 6.4520019175910021e-03 1.6376905982584183e-03 -7.3490524071098086e-03
136 -8.8680828310051842e-03 -9.9957516382688343e-03 -1.1268565448965808e-03
150 1.2644057919831786e-02 7.2589044391057388e-03 -7.9566119336268847e-03
159 2.0899716358673225e-02 1.7429372317526306e-02 -1.3292790545140921e-02
151 1.3903356241662607e-02 8.4808782922695600e-03 3.6836744896911245e-03
154 -2.9325125457052839e-03 -5.7434384745342903e-03 1.0435979378087747e-02
155 1.7409771829462826e-02 3.5800759395204019e-03 1.5746044322110672e-02
180 -1.3806859442971808e-03 4.6334564173086531e-03 -3.5052093794598602e-02
177 1.3121331211293722e-02 1.4981607227173521e-02 2.1908868797298835e-04
234 8.9370501120227095e-04 8.9363057578264950e-04 3.2426239387154682e-03
231 -1.6138848832197020e-02 7.5727303795379208e-03 1.9824675053319429e-03
237 -2.8205759970403189e-02 -2.6634719641219374e-02 -4.7776929032872097e-02
236 -1.9435612508090075e-02 6.0930060498971921e-03 -1.6319488246188591e-03
230 1.9386712131971056e-02 6.5426314305059826e-03 5.4413079792494257e-04
119 1.7355663613047217e-02 5.7079822938173805e-03 1.3289787709836957e-02
152 -3.8658992078315026e-04 1.0175567107500673e-03 7.3207033667610480e-05
147 1.4381894559518705e-02 -6.2116529420747080e-03 4.2528639468970503e-03
157 7.3346614207812702e-03 1.0367213263170761e-02 -1.2706087975058946e-02
158 -4.0560058689886949e-03 -3.2530809921343697e-03 -4.0046278898322210e-04
160 -5.2243134214067502e-03 -1.0363963684387481e-02 5.0529746536605406e-03
148 4.3684841935940494e-03 -9.9611008675726202e-03 3.5700101928759082e-03
149 9.7757553220976091e-04 1.3247888003382214e-03 -1.2113127926908069e-02
153 9.4812574848669329e-03 -6.7673646045421920e-03 7.6833974823941151e-02
235 -1.1864006035092863e-02 8.5267828537555592e-04 -7.7304238172500751e-03
229 -4.3436232172744525e-02 3.3946805195747082e-02 -3.9488449466209850e-02
228 6.1008278785282576e-03 -2.5772252667599542e-03 -7.6772127926619414e-03
222 -7.4482412020590713e-03 1.4645029480186977e-03 -2.1736687080980187e-03
223 7.5213166425181909e-04 -1.4794462425701274e-02 7.4954875849246871e-03
120 -3.6403018248218899e-02 7.5330879046183420e-03 -2.0377053706387798e-02
181 -2.2766485890370045e-02 -2.7168687896973239e-02 3.3167216573129918e-02
182 2.0427489665614969e-02 -1.7496539703354463e-02 -1.3546040175064824e-02
179 -1.1453598187382530e-02 1.2885431683178034e-02 -5.3521931327981517e-03
178 1.3522936562639851e-03 1.3590965144437710e-02 5.2415982999015351e-03
176 1.6150101525462340e-02 -1.1022527247069746e-02 3.3444681467664759e-03
186 -4.5780330536643998e-03 4.7682669990995125e-03 -1.4204922248856708e-05
187 -9.6556388090654442e-03 1.2341311286667936e-04 -6.9271472622837145e-03
183 1.7827160260214454e-03 -1.9234314590501247e-03 -1.7131974838546611e-03
189 -3.2905189718921257e-02 -1.5291021553544877e-02 -6.4087448090496657e-02
200 -1.2921329457407742e-02 -1.8750527216939428e-02 -3.1721523684333044e-03
193 8.6767133060088389e-03 -1.4256615584494528e-02 8.7804496072683771e-03
198 -4.8447776212903488e-03 -4.9736650039411646e-03 -2.9012057565954144e-03
201 1.1928245197456890e-02 4.9253235510007191e-04 -3.4996554770039042e-03
192 5.7224174365482659e-03 6.8961225505895845e-03 -1.0662412706371041e-02
197 4.9682128288971016e-03 -4.0704152387171727e-03 4.2083101811203737e-03
194 1.1718748301356185e-03 3.9360734204351685e-03 -4.0416833884142416e-03
221 -1.9738060955058489e-02 6.0611049518837341e-02 -3.5170174061245757e-02
219 -6.0781275378090421e-03 4.8536672631637068e-03 2.2414390352898297e-04
220 7.4787332808269194e-03 1.0454572525463945e-02 2.4956209943411127e-02
216 4.1279304415955155e-03 -2.1672145750158845e-03 7.0491839805819992e-04
218 3.7895628877399001e-02 -1.6571682762724877e-02 -3.9324689430059821e-03
213 1.4241079342906309e-03 -3.8809898720229452e-03 2.8092825021828281e-03
208 1.8448843808439200e-02 2.8968073382669601e-02 -8.8409505303229038e-03
215 -2.0277904762999750e-02 -3.8521536810925981e-02 2.5280413948028897e-02
214 -2.2835242365802587e-03 -1.7560698329353813e-03 4.4383073942945144e-03
203 5.0139450253966177e-03 1.5387441012166226e-02 3.8054296860672667e-03
212 3.7566834586477975e-04 3.4293534570158908e-03 6.2567507964807565e-03
204 3.6939579275824435e-03 -6.5456863936491274e-03 1.3855180089207936e-02
205 -4.5551627863297016e-03 7.9559974883826653e-03 1.9245326652353911e-03
206 1.2829123675832129e-02 3.2031391771319066e-03 -7.0504875488098685e-03
209 2.3271828241990425e-03 -7.1843535979312116e-03 1.1314429715706176e-02
190 7.6822599026763532e-03 -1.9341934828569160e-03 1.0755525009678147e-02
199 -3.1354518353469379e-03 -3.2243319876126878e-03 1.8295693126505808e-02
196 -1.4613043193493079e-03 9.9970991444818854e-03 -1.1051366336985668e-03
191 7.6350850185662855e-03 8.7529472154536793e-04 5.4885617208319448e-03
238 -3.4010283720270506e-03 9.9988211851865273e-03 -4.8601913377323757e-03
243 -8.5241908754377545e-03 2.0421718892378619e-03 5.4328958930485215e-03
242 -5.8728408458543161e-03 -6.7753886254802225e-04 5.0759352322895333e-03
247 1.0373611119208094e-02 3.7258953625293460e-02 8.6153072355019695e-03
202 -8.1293418523157787e-03 2.4128906600235688e-03 -2.0316272825304622e-04
211 2.1718286235646081e-03 -3.0723796801232785e-03 1.0027740642716965e-02
207 -1.8273953325146606e-04 -1.0015647583622583e-02 -2.9887611080505376e-03
195 -2.9022987288213444e-04 5.9976964897489882e-03 6.0484140018824710e-03
279 -7.7273666786782422e-02 -1.8843467873568873e-02 -8.7423409188853718e-03
246 1.7227486644741021e-02 1.1665565246571225e-02 -2.1125670812605787e-02
265 3.3783172849657608e-02 1.3720376460779244e-02 -2.5362366392077149e-02
270 5.4255951362123626e-03 -2.4012031650766335e-03 -1.0683173590391635e-03
271 2.0013184442651790e-02 -4.3140557439894679e-03 -2.5447094283850086e-02
141 4.6227559834958057e-03 5.0640076238073093e-03 6.8226579826184187e-04
137 1.8505524026044041e-03 1.9171127232546837e-03 4.0606506593613336e-03
138 4.2393557589814239e-03 4.4420362394338379e-02 -1.2190599234649629e-03
144 2.2738427857624040e-02 1.0964290164718013e-02 -2.3153710649589862e-02
128 4.3129049215163279e-03 1.1484706002200169e-03 3.2091091998912237e-03
129 -6.8949347679542550e-03 1.2858538913169909e-02 -2.8025749689864678e-03
130 2.4644659949238056e-02 -4.8463296892507668e-02 1.4726052286908070e-02
127 -3.8299367596767407e-02 1.8667174491717410e-03 -5.0604942210756921e-03
126 1.1529774349526132e-02 2.4345747616922966e-03 -1.2905673012246108e-02
123 1.6233450601357031e-03 1.9658018010504093e-02 2.8376710136863773e-02
125 -3.2899437683588696e-03 1.1369749528197600e-02 5.1168981779693380e-03
139 3.1314529042638602e-02 3.5977574499133982e-02 -2.6517210625624461e-02
124 -1.6908604066674694e-02 1.3247814444048952e-03 4.5307216219386826e-02
122 3.6911402312933854e-04 1.2871593349360437e-02 1.4196821536028111e-02
113 -4.3091376028672477e-03 -8.8329438633898642e-03 -8.0054436591980964e-03
121 7.7384554687977215e-04 -1.7666452135831194e-03 3.1888650176740817e-03
118 4.6469373806540207e-03 1.9876236878741918e-02 -3.6819844232529736e-03
114 4.6790653376140717e-03 -3.6089563728027682e-03 4.1392494145174119e-03
115 1.8809675533593341e-02 6.7201955957112529e-03 1.3436203362754686e-02
156 4.0740821567109203e-02 2.8817248857562070e-02 2.8193006539092205e-02
112 -5.3688936570026025e-04 -1.1300682564398168e-02 1.1411755114333915e-02
117 -9.1892805836065166e-03 -2.4332372427010293e-02 -3.7655468934582353e-02
105 -6.8512580996750753e-04 4.5218073083019604e-03 1.7600585134600678e-03
104 -6.7207486054590287e-03 -9.3580847197290186e-03 -1.1850797253780721e-04
111 -4.5281917986372223e-03 8.9349473631377754e-03 -4.1397314719142696e-03
99 -9.1641467870537535e-03 -1.5861884222754729e-03 3.4207360235558610e-03
100 1.3027440062050123e-02 1.6616033323685979e-03 1.1327898352141489e-03
96 3.5473249118024627e-03 -1.0361078748488007e-03 1.4211717147831799e-02
116 -2.5404896931378908e-03 -6.8186307396884260e-03 -3.5178795809030156e-03
92 -7.1977427302273083e-03 -2.7584157880907131e-03 -6.9031566448373377e-03
101 6.5663625927365570e-03 -9.9105190711463939e-03 -3.1156378778891004e-06
103 -7.8418203727575533e-03 -1.8860700793604018e-03 -1.6512900267411191e-02
108 -1.0307979510553494e-02 2.1797962794487804e-03 5.5821785341824163e-03
19 1.9544959208858372e-02 -1.4071541014726834e-02 4.4718285225432336e-02
106 1.4977782933056892e-03 2.0380081585060061e-03 -1.6498776143516410e-02
102 -1.9223697153515744e-03 -6.4462650153122554e-03 3.2180554112255051e-04
107 9.4278694454055061e-03 1.4302383133381433e-03 1.4894186466447121e-03
109 2.1146077825912837e-02 -1.5253730146976483e-02 -2.5872261751062497e-02
188 1.0059143341532170e-02 2.3972268264843062e-02 1.0714742895033850e-02
185 -1.0290081173467450e-02 1.4621642434871466e-03 5.4252973666164403e-03
184 1.1579870384405779e-02 -3.4618213815569309e-03 -8.1472652214021441e-04
110 1.3956981627268494e-02 -1.1637749189466700e-02 1.8706470658643573e-02
90 7.6677625524866084e-03 8.4926140672023694e-03 -8.5113446011970007e-03
87 -3.9582786915358076e-02 -2.2927554432668699e-02 -1.0380651551130502e-02
91 2.4272300279494667e-02 -6.2876785031112563e-03 9.2289238634144666e-03
88 -1.0836336386632428e-02 -1.9634536870413101e-03 1.6285694389676054e-03
89 -3.3056200734132055e-02 -2.9049643426996997e-02 1.5659078210267293e-02
210 1.6087685085192666e-02 -2.1349113667330785e-04 -9.3915302803784448e-03
95 -5.0322390463269735e-03 -1.0040765728200000e-02 -3.8338115363275091e-04
16 1.7621343100304545e-03 6.6413195045736536e-04 4.8548022846853778e-03
15 -9.6855686535633530e-03 5.8527130599981593e-04 3.4621826250514585e-04
94 1.8601447732990799e-03 6.1069468190046820e-03 -4.4772310583076754e-03
97 3.1008955928149489e-02 -2.6516845933712433e-03 -1.4449979056694521e-02
93 -1.7581688165324825e-02 1.0733883135782997e-02 7.8212865476384491e-04
98 -2.4021470953143726e-03 3.1270137517990485e-03 2.4864916431211439e-02
78 4.2434401030199305e-03 2.0594134843879498e-02 1.2920215607884816e-02
76 7.0946601010614752e-03 -3.2422916104218628e-03 -1.0103951066207172e-02
77 1.7730524838115658e-02 -2.0090907976253514e-02 9.3477908391132846e-04
71 -2.1695690831947684e-02 -3.4032575768597195e-02 -2.9468894097546952e-02
70 -1.5807245216289661e-03 1.4836199946720991e-02 -3.7734554922710063e-03
73 9.0870380810739830e-03 2.4341384476464650e-04 -7.6076709375205642e-03
72 3.1198436266345799e-02 3.7224404601292969e-02 1.1967708474078265e-02
75 -8.1786343257081832e-03 7.3805425974681031e-03 -1.2811173725319810e-02
74 9.8966452501384524e-03 2.6862160827310818e-04 -3.1495377950152836e-02
81 1.3871727758193477e-02 -3.5823704249913577e-03 -2.1202599557430975e-02
80 -5.8526721617796994e-04 3.0474717740018348e-03 2.0512849380659288e-02
84 -9.4470174925440718e-03 3.3803613944560764e-03 4.4745333152407590e-03
79 -5.1541586965767241e-03 7.5623944809820485e-03 1.5668794044137103e-02
83 8.6657284689447018e-03 3.3200389716188071e-02 3.0511717214374175e-02
86 1.0572328017681029e-02 -9.4545318423405311e-03 2.1141472419389084e-03
85 -6.3822744223353224e-04 -7.1007884377972778e-03 6.1282852355298211e-03
82 -2.6599912639678472e-03 4.0849725298104586e-03 1.1094238717669490e-03
18 -3.9920335896837154e-02 2.6572990163499382e-02 -1.9609773946469476e-02
11 -7.6286937709623241e-03 -1.5456699919412089e-02 4.6787953253496937e-03
6 2.1464320472401873e-02 -7.1987882769738451e-03 8.1979845097431420e-03
4 1.4329474615950083e-02 5.7394197324714792e-03 1.3310185172971067e-02
3 -9.9594156702094883e-04 4.4476567135837844e-03 -9.6521476557986496e-04
7 3.0186659121238121e-02 1.2212776924723071e-02 -1.1267163662621038e-02
1093 2.6568754365888750e-02 2.3226436469549385e-02 -5.2072357193664338e-03
2 5.5117592243218395e-03 3.7863010444595959e-03 -2.5937647251920472e-03
5 7.0589765943806981e-03 1.1162099869614601e-02 -2.5463482661977560e-03
10 1.0052609105711567e-02 -2.5886053692395199e-03 1.1070176390018302e-02
1 -2.3642346368172758e-03 -4.9833515351912728e-03 1.9895296701272053e-03
17 9.7228875184327632e-03 1.1287129322101488e-02 -1.3352309706864065e-02
12 -1.4021656114431384e-03 3.2671890815209230e-03 1.5404283917970977e-02
13 3.2216798811352358e-03 -4.0084180731109432e-03 -8.3971393987103040e-03
29 -2.8953469676665889e-02 -2.1455549452003165e-02 2.3912784400924217e-02
8 9.8395765337307376e-03 -5.7579619585711415e-03 5.5026084552301201e-03
21 2.6158377974653995e-03 2.3523952398036689e-03 -2.2621505344215978e-03
25 -5.3485164478441127e-03 -3.8137892181870758e-03 6.7025225781385195e-03
20 -4.2077234649987062e-03 4.9031102625205507e-06 3.4992263046120663e-03
9 -1.0963994201556150e-03 -1.7649693657667983e-03 7.2021500192116523e-03
14 6.0196296511144990e-04 1.3537502364311125e-03 -4.5342582362044572e-03
22 1.2516388598728619e-02 6.3591108519162418e-03 -1.1132231482262891e-03
26 -1.3332711334251766e-02 -3.8492143714787541e-03 -1.0651071311508511e-02
65 -5.0879777515716058e-03 -2.2353245777549595e-02 -1.5473981613795932e-02
56 9.7883573535447483e-03 -6.8294199171863345e-03 -4.1756338884557214e-04
62 -4.6579384381477953e-03 4.0104535306840426e-04 1.5880319364110197e-02
63 -2.2854524607623253e-03 5.8367620280610653e-03 1.1855316631367175e-02
59 -5.8692448477623352e-03 5.8627123906757278e-03 -1.8383881131339818e-03
60 8.3732271848379098e-05 -6.3224044618249656e-03 -4.3647637858029286e-03
64 -1.8999256940993071e-02 -1.4996925247386056e-03 -1.4206248099580460e-02
66 5.6619841816735227e-03 -1.4182271999891393e-02 2.1194966322625342e-03
58 -6.8212908375353100e-03 -2.6301767259528852e-03 5.7673850874330880e-04
61 1.9201784918828570e-03 -1.6249233095439795e-03 5.0854237320252177e-03
67 4.6125711342613869e-03 1.4328599507053003e-02 -3.3349956790589093e-03
57 -1.2276344473616340e-02 -3.2011471638923260e-03 -2.6351983664012176e-03
68 3.7684391992112001e-02 1.9457689809359916e-02 -3.8394166217518596e-03
30 -1.3232446729274258e-04 3.4970424319849813e-03 2.3033900791767778e-03
69 -2.2336656403534650e-02 3.0484067323308033e-02 4.2353321896293053e-02
23 -2.9557080666124595e-03 7.2023560892764925e-03 1.9160138196079527e-03
28 -8.8473645044196570e-03 -5.4901668931018419e-03 1.4754071286064747e-02
24 -1.1061397666821018e-03 -4.0412662233658353e-03 1.3102169233840172e-02
27 -3.2441695086813018e-03 2.2842784437127569e-03 7.5653643894944712e-03
32 1.3306215721617781e-02 -6.8316428303338284e-03 6.1404693054248831e-02
48 1.2123488217625876e-02 2.5127502053449713e-02 -2.2379338392997498e-02
41 8.6061409518799886e-04 1.5336032426191387e-02 4.9565887577553931e-02
40 -9.3056210891691521e-04 -1.0999463902993046e-02 8.8161306061829998e-03
42 1.4659882212505129e-02 -1.9652944467179124e-02 1.5137017695647789e-02
37 -1.4689286252147269e-02 8.1642468737403821e-03 -5.6814765400918059e-03
44 -7.1301212133862129e-03 -3.5400829566531851e-02 1.7452065607558957e-02
39 -1.0395984722707982e-02 1.7988118790646566e-02 7.9167132263059017e-03
38 1.8138521874817185e-02 -4.1593157454626745e-02 -3.5349793884208502e-02
43 -7.2199094609765651e-03 5.3838759706688550e-03 -3.4653005760791004e-04
45 2.3656533861230011e-02 2.9730994565857986e-02 -3.2488657354820681e-03
52 1.5526275361923107e-04 -6.0722125684714769e-03 2.7034430101958618e-03
54 9.3818512835602847e-03 -1.9269525500828052e-02 1.8374724984694505e-02
55 -5.5671994634057568e-04 -5.8670683084196167e-03 -2.9191063053402873e-04
53 9.9699661352191252e-04 1.1099653324534221e-03 4.9456856632040377e-03
49 -7.9395061229371264e-03 1.1042895792267447e-02 7.4362836984031991e-03
51 -4.1169303122540156e-02 -3.5851643570194498e-02 1.2215237870799027e-02
50 -8.4745398036825351e-03 6.0485500932232518e-03 3.5312389055085327e-03
47 7.5610054686529420e-03 -7.1232164814166244e-03 5.2820852324639914e-03
46 -4.5811428493293272e-03 -1.5140222383729250e-02 4.6281995765978454e-03
34 -2.0887100352890674e-03 -5.4409977404036901e-03 -8.1749960320067153e-03
36 2.8962636101159118e-03 2.0534764636502261e-02 -2.9198778117352098e-02
1089 -2.3291658743093764e-03 2.8594276599927101e-03 5.3405723263289795e-03
1092 -1.7177597161854821e-02 -4.8100063361057720e-03 2.2736955485640500e-02
1090 1.6057600813144838e-02 1.7842903801196110e-02 8.3158828641263938e-03

Bonds

1 23 980 981
2 23 980 982
3 24 980 983
4 21 977 978
5 21 977 979
6 22 977 980
7 13 1012 1017
8 14 1012 1019
9 11 1016 1017
10 12 1016 1018
11 27 1016 1094
12 14 1017 1020
13 2 1005 1006
14 5 1005 1008
15 11 1011 1012
16 12 1011 1013
17 6 1006 1011
18 7 1009 1010
19 8 1009 1013
20 15 1013 1018
21 7 1014 1015
22 8 1014 1018
23 18 1062 1066
24 16 1061 1062
25 18 1061 1065
26 9 1010 1015
27 10 1010 1021
28 10 1015 1057
29 17 1059 1060
30 19 1059 1067
31 16 1057 1058
32 16 1057 1062
33 17 1058 1059
34 18 1058 1063
35 20 1067 1068
36 23 1074 1075
37 23 1074 1076
38 24 1074 1077
39 23 1071 1072
40 23 1071 1073
41 24 1071 1074
42 21 1068 1069
43 21 1068 1070
44 22 1068 1071
45 16 1060 1061
46 18 1060 1064
47 23 1077 1078
48 23 1077 1079
49 24 1077 1080
50 23 1086 1087
51 23 1086 1088
52 25 1086 1089
53 23 1083 1084
54 23 1083 1085
55 24 1083 1086
56 23 1080 1081
57 23 1080 1082
58 24 1080 1083
59 23 986 987
60 23 986 988
61 24 986 989
62 23 989 990
63 23 989 991
64 24 989 992
65 26 998 999
66 26 998 1000
67 26 998 1001
68 23 995 996
69 23 995 997
70 25 995 998
71 23 992 993
72 23 992 994
73 24 992 995
74 20 940 941
75 21 941 942
76 21 941 943
77 22 941 944
78 23 944 945
79 23 944 946
80 24 944 947
81 23 947 948
82 23 947 949
83 24 947 950
84 23 950 951
85 23 950 952
86 24 950 953
87 23 953 954
88 23 953 955
89 24 953 956
90 23 983 984
91 23 983 985
92 24 983 986
93 20 976 977
94 17 968 969
95 19 968 976
96 16 969 970
97 18 969 973
98 17 967 968
99 18 967 972
100 16 879 880
101 18 879 883
102 16 878 879
103 18 878 882
104 18 880 884
105 17 931 932
106 18 931 936
107 17 932 933
108 19 932 940
109 17 877 878
110 19 877 885
111 17 876 877
112 18 876 881
113 16 966 967
114 16 966 971
115 7 923 924
116 8 923 927
117 10 924 966
118 9 919 924
119 10 919 930
120 18 935 939
121 16 930 931
122 16 930 935
123 7 918 919
124 8 918 922
125 18 971 975
126 16 970 971
127 18 970 974
128 23 892 893
129 23 892 894
130 24 892 895
131 23 895 896
132 23 895 897
133 24 895 898
134 23 898 899
135 23 898 900
136 24 898 901
137 1 1002 1003
138 1 1002 1006
139 23 889 890
140 23 889 891
141 24 889 892
142 21 886 887
143 21 886 888
144 22 886 889
145 20 885 886
146 11 920 921
147 12 920 922
148 15 922 927
149 4 1004 1005
150 5 1004 1007
151 11 925 926
152 12 925 927
153 6 925 1003
154 2 1003 1004
155 14 926 929
156 13 921 926
157 14 921 928
158 23 901 902
159 23 901 903
160 24 901 904
161 23 904 905
162 23 904 906
163 25 904 907
164 26 907 908
165 26 907 909
166 26 907 910
167 23 1035 1036
168 23 1035 1037
169 24 1035 1038
170 23 1038 1039
171 23 1038 1040
172 24 1038 1041
173 21 1032 1033
174 21 1032 1034
175 22 1032 1035
176 16 1021 1022
177 16 1021 1026
178 17 1022 1023
179 18 1022 1027
180 17 1023 1024
181 19 1023 1031
182 18 1026 1030
183 20 1031 1032
184 16 1024 1025
185 18 1024 1028
186 16 1025 1026
187 18 1025 1029
188 21 31 32
189 21 31 33
190 22 31 34
191 23 868 869
192 23 868 870
193 25 868 871
194 23 853 854
195 23 853 855
196 24 853 856
197 23 856 857
198 23 856 858
199 24 856 859
200 18 789 793
201 20 849 850
202 21 850 851
203 21 850 852
204 22 850 853
205 23 959 960
206 23 959 961
207 25 959 962
208 23 956 957
209 23 956 958
210 24 956 959
211 26 962 963
212 26 962 964
213 26 962 965
214 16 788 789
215 18 788 792
216 16 787 788
217 18 787 791
218 16 843 844
219 18 843 847
220 18 844 848
221 16 842 843
222 18 842 846
223 17 841 842
224 19 841 849
225 9 828 833
226 10 828 839
227 16 839 840
228 16 839 844
229 17 840 841
230 18 840 845
231 21 795 796
232 21 795 797
233 22 795 798
234 17 786 787
235 19 786 794
236 20 794 795
237 23 798 799
238 23 798 800
239 24 798 801
240 7 827 828
241 8 827 831
242 16 875 876
243 16 875 880
244 16 934 935
245 18 934 938
246 16 933 934
247 18 933 937
248 10 833 875
249 7 832 833
250 8 832 836
251 15 831 836
252 11 829 830
253 12 829 831
254 13 830 835
255 14 830 837
256 23 801 802
257 23 801 803
258 24 801 804
259 23 807 808
260 23 807 809
261 24 807 810
262 23 804 805
263 23 804 806
264 24 804 807
265 1 911 912
266 1 911 915
267 6 915 920
268 2 914 915
269 5 914 917
270 2 912 913
271 11 834 835
272 12 834 836
273 6 834 912
274 4 913 914
275 5 913 916
276 14 835 838
277 23 1041 1042
278 23 1041 1043
279 24 1041 1044
280 23 1044 1045
281 23 1044 1046
282 24 1044 1047
283 23 1047 1048
284 23 1047 1049
285 24 1047 1050
286 23 1050 1051
287 23 1050 1052
288 25 1050 1053
289 26 1053 1054
290 26 1053 1055
291 26 1053 1056
292 26 780 781
293 26 780 782
294 26 780 783
295 23 765 766
296 23 765 767
297 24 765 768
298 23 768 769
299 23 768 770
300 24 768 771
301 23 774 775
302 23 774 776
303 24 774 777
304 23 777 778
305 23 777 779
306 25 777 780
307 23 771 772
308 23 771 773
309 24 771 774
310 21 759 760
311 21 759 761
312 22 759 762
313 23 762 763
314 23 762 764
315 24 762 765
316 26 871 872
317 26 871 873
318 26 871 874
319 20 758 759
320 16 751 752
321 18 751 755
322 16 752 753
323 18 752 756
324 4 731 732
325 5 731 734
326 17 750 751
327 19 750 758
328 17 749 750
329 18 749 754
330 16 748 749
331 16 748 753
332 18 753 757
333 23 859 860
334 23 859 861
335 24 859 862
336 10 742 784
337 9 737 742
338 10 737 748
339 2 732 733
340 5 732 735
341 6 733 738
342 7 736 737
343 8 736 740
344 15 740 745
345 11 738 739
346 12 738 740
347 23 862 863
348 23 862 864
349 24 862 865
350 23 865 866
351 23 865 867
352 24 865 868
353 14 744 747
354 13 739 744
355 14 739 746
356 1 729 730
357 1 729 733
358 23 813 814
359 23 813 815
360 25 813 816
361 26 816 817
362 26 816 818
363 26 816 819
364 17 785 786
365 18 785 790
366 16 784 785
367 16 784 789
368 7 741 742
369 8 741 745
370 23 722 723
371 23 722 724
372 25 722 725
373 23 719 720
374 23 719 721
375 24 719 722
376 23 716 717
377 23 716 718
378 24 716 719
379 26 725 726
380 26 725 727
381 26 725 728
382 11 743 744
383 12 743 745
384 6 743 821
385 1 820 821
386 1 820 824
387 6 824 829
388 2 823 824
389 5 823 826
390 2 821 822
391 4 822 823
392 5 822 825
393 23 810 811
394 23 810 812
395 24 810 813
396 23 628 629
397 23 628 630
398 24 628 631
399 23 622 623
400 23 622 624
401 24 622 625
402 23 619 620
403 23 619 621
404 24 619 622
405 23 625 626
406 23 625 627
407 24 625 628
408 23 616 617
409 23 616 618
410 24 616 619
411 21 613 614
412 21 613 615
413 22 613 616
414 20 612 613
415 16 605 606
416 18 605 609
417 17 604 605
418 19 604 612
419 16 606 607
420 18 606 610
421 17 603 604
422 18 603 608
423 23 540 541
424 23 540 542
425 25 540 543
426 23 537 538
427 23 537 539
428 24 537 540
429 23 534 535
430 23 534 536
431 24 534 537
432 15 649 654
433 7 645 646
434 8 645 649
435 6 642 647
436 11 647 648
437 12 647 649
438 13 648 653
439 14 648 655
440 2 641 642
441 5 641 644
442 14 653 656
443 4 640 641
444 5 640 643
445 26 543 544
446 26 543 545
447 26 543 546
448 2 730 731
449 11 652 653
450 12 652 654
451 6 652 730
452 7 650 651
453 8 650 654
454 9 646 651
455 10 646 657
456 16 693 694
457 16 693 698
458 10 651 693
459 17 695 696
460 19 695 703
461 20 703 704
462 21 704 705
463 21 704 706
464 22 704 707
465 17 694 695
466 18 694 699
467 18 698 702
468 16 697 698
469 18 697 701
470 16 696 697
471 18 696 700
472 16 657 658
473 16 657 662
474 18 662 666
475 23 707 708
476 23 707 709
477 24 707 710
478 23 710 711
479 23 710 712
480 24 710 713
481 23 713 714
482 23 713 715
483 24 713 716
484 23 595 596
485 23 595 597
486 25 595 598
487 26 598 599
488 26 598 600
489 26 598 601
490 23 580 581
491 23 580 582
492 24 580 583
493 23 589 590
494 23 589 591
495 24 589 592
496 23 592 593
497 23 592 594
498 24 592 595
499 23 583 584
500 23 583 585
501 24 583 586
502 23 586 587
503 23 586 588
504 24 586 589
505 21 577 578
506 21 577 579
507 22 577 580
508 26 634 635
509 26 634 636
510 26 634 637
511 23 631 632
512 23 631 633
513 25 631 634
514 16 569 570
515 18 569 573
516 16 515 516
517 18 515 519
518 16 514 515
519 18 514 518
520 17 513 514
521 19 513 521
522 18 607 611
523 16 602 603
524 16 602 607
525 16 566 567
526 16 566 571
527 10 560 602
528 9 555 560
529 10 555 566
530 7 559 560
531 8 559 563
532 15 558 563
533 7 554 555
534 8 554 558
535 20 576 577
536 17 568 569
537 19 568 576
538 17 567 568
539 18 567 572
540 16 570 571
541 18 570 574
542 18 571 575
543 23 531 532
544 23 531 533
545 24 531 534
546 23 525 526
547 23 525 527
548 24 525 528
549 20 521 522
550 21 522 523
551 21 522 524
552 22 522 525
553 23 528 529
554 23 528 530
555 24 528 531
556 11 556 557
557 12 556 558
558 1 638 639
559 1 638 642
560 2 639 640
561 11 561 562
562 12 561 563
563 6 561 639
564 14 562 565
565 13 557 562
566 14 557 564
567 21 668 669
568 21 668 670
569 22 668 671
570 23 671 672
571 23 671 673
572 24 671 674
573 23 674 675
574 23 674 676
575 24 674 677
576 17 658 659
577 18 658 663
578 16 661 662
579 18 661 665
580 16 660 661
581 18 660 664
582 17 659 660
583 19 659 667
584 20 667 668
585 21 486 487
586 21 486 488
587 22 486 489
588 20 485 486
589 18 516 520
590 16 511 512
591 16 511 516
592 17 512 513
593 18 512 517
594 10 469 511
595 9 464 469
596 10 464 475
597 16 479 480
598 18 479 483
599 17 477 478
600 19 477 485
601 17 476 477
602 18 476 481
603 16 478 479
604 18 478 482
605 16 475 476
606 16 475 480
607 18 480 484
608 7 463 464
609 8 463 467
610 7 468 469
611 8 468 472
612 1 547 548
613 1 547 551
614 11 470 471
615 12 470 472
616 6 470 548
617 2 548 549
618 14 471 474
619 15 467 472
620 11 465 466
621 12 465 467
622 13 466 471
623 14 466 473
624 23 489 490
625 23 489 491
626 24 489 492
627 23 492 493
628 23 492 494
629 24 492 495
630 23 495 496
631 23 495 497
632 24 495 498
633 23 498 499
634 23 498 500
635 24 498 501
636 23 501 502
637 23 501 503
638 24 501 504
639 26 689 690
640 26 689 691
641 26 689 692
642 23 686 687
643 23 686 688
644 25 686 689
645 23 680 681
646 23 680 682
647 24 680 683
648 23 683 684
649 23 683 685
650 24 683 686
651 4 549 550
652 5 549 552
653 6 551 556
654 2 550 551
655 5 550 553
656 23 677 678
657 23 677 679
658 24 677 680
659 23 504 505
660 23 504 506
661 25 504 507
662 26 507 508
663 26 507 509
664 26 507 510
665 13 375 380
666 14 375 382
667 10 378 420
668 16 420 421
669 16 420 425
670 15 376 381
671 9 373 378
672 10 373 384
673 18 425 429
674 16 424 425
675 18 424 428
676 16 423 424
677 18 423 427
678 2 459 460
679 5 459 462
680 4 458 459
681 5 458 461
682 14 380 383
683 1 456 457
684 1 456 460
685 6 460 465
686 2 457 458
687 11 379 380
688 12 379 381
689 6 379 457
690 7 377 378
691 8 377 381
692 17 421 422
693 18 421 426
694 17 422 423
695 19 422 430
696 20 430 431
697 21 431 432
698 21 431 433
699 22 431 434
700 23 434 435
701 23 434 436
702 24 434 437
703 23 440 441
704 23 440 442
705 24 440 443
706 23 437 438
707 23 437 439
708 24 437 440
709 23 322 323
710 23 322 324
711 25 322 325
712 23 319 320
713 23 319 321
714 24 319 322
715 16 333 334
716 18 333 337
717 16 332 333
718 18 332 336
719 18 334 338
720 16 329 330
721 16 329 334
722 17 331 332
723 19 331 339
724 1 365 366
725 1 365 369
726 17 330 331
727 18 330 335
728 10 287 329
729 7 286 287
730 8 286 290
731 2 366 367
732 4 367 368
733 5 367 370
734 11 374 375
735 12 374 376
736 6 369 374
737 2 368 369
738 5 368 371
739 7 372 373
740 8 372 376
741 21 395 396
742 21 395 397
743 22 395 398
744 23 398 399
745 23 398 400
746 24 398 401
747 17 385 386
748 18 385 390
749 16 384 385
750 16 384 389
751 11 288 289
752 12 288 290
753 6 288 366
754 14 289 292
755 23 401 402
756 23 401 403
757 24 401 404
758 20 394 395
759 17 386 387
760 19 386 394
761 16 387 388
762 18 387 391
763 18 389 393
764 16 388 389
765 18 388 392
766 26 452 453
767 26 452 454
768 26 452 455
769 23 449 450
770 23 449 451
771 25 449 452
772 23 446 447
773 23 446 448
774 24 446 449
775 23 443 444
776 23 443 445
777 24 443 446
778 23 316 317
779 23 316 318
780 24 316 319
781 26 325 326
782 26 325 327
783 26 325 328
784 23 310 311
785 23 310 312
786 24 310 313
787 23 307 308
788 23 307 309
789 24 307 310
790 23 313 314
791 23 313 315
792 24 313 316
793 21 304 305
794 21 304 306
795 22 304 307
796 20 303 304
797 23 164 165
798 23 164 166
799 24 164 167
800 23 161 162
801 23 161 163
802 24 161 164
803 16 296 297
804 18 296 300
805 23 225 226
806 23 225 227
807 24 225 228
808 23 173 174
809 23 173 175
810 24 173 176
811 23 170 171
812 23 170 172
813 24 170 173
814 23 167 168
815 23 167 169
816 24 167 170
817 17 295 296
818 19 295 303
819 17 294 295
820 18 294 299
821 1 274 275
822 1 274 278
823 2 275 276
824 23 404 405
825 23 404 406
826 24 404 407
827 23 407 408
828 23 407 409
829 24 407 410
830 23 410 411
831 23 410 412
832 24 410 413
833 20 339 340
834 21 340 341
835 21 340 342
836 22 340 343
837 16 297 298
838 18 297 301
839 18 298 302
840 16 293 294
841 16 293 298
842 9 282 287
843 10 282 293
844 21 249 250
845 21 249 251
846 22 249 252
847 20 248 249
848 7 281 282
849 8 281 285
850 15 285 290
851 23 252 253
852 23 252 254
853 24 252 255
854 17 239 240
855 18 239 244
856 17 240 241
857 19 240 248
858 16 241 242
859 18 241 245
860 2 277 278
861 5 277 280
862 4 276 277
863 5 276 279
864 6 278 283
865 11 283 284
866 12 283 285
867 13 284 289
868 14 284 291
869 23 255 256
870 23 255 257
871 24 255 258
872 26 416 417
873 26 416 418
874 26 416 419
875 23 413 414
876 23 413 415
877 25 413 416
878 23 343 344
879 23 343 345
880 24 343 346
881 23 358 359
882 23 358 360
883 25 358 361
884 23 355 356
885 23 355 357
886 24 355 358
887 23 352 353
888 23 352 354
889 24 352 355
890 23 349 350
891 23 349 351
892 24 349 352
893 23 346 347
894 23 346 348
895 24 346 349
896 23 261 262
897 23 261 263
898 24 261 264
899 23 258 259
900 23 258 260
901 24 258 261
902 23 267 268
903 23 267 269
904 25 267 270
905 23 264 265
906 23 264 266
907 24 264 267
908 26 361 362
909 26 361 363
910 26 361 364
911 23 140 141
912 23 140 142
913 25 140 143
914 26 143 144
915 26 143 145
916 26 143 146
917 23 134 135
918 23 134 136
919 24 134 137
920 23 131 132
921 23 131 133
922 24 131 134
923 16 150 151
924 18 150 154
925 16 151 152
926 18 151 155
927 26 234 235
928 26 234 236
929 26 234 237
930 23 231 232
931 23 231 233
932 25 231 234
933 18 152 156
934 16 147 148
935 16 147 152
936 20 157 158
937 21 158 159
938 21 158 160
939 22 158 161
940 17 148 149
941 18 148 153
942 17 149 150
943 19 149 157
944 23 228 229
945 23 228 230
946 24 228 231
947 23 222 223
948 23 222 224
949 24 222 225
950 26 179 180
951 26 179 181
952 26 179 182
953 23 176 177
954 23 176 178
955 25 176 179
956 2 186 187
957 5 186 189
958 6 187 192
959 1 183 184
960 1 183 187
961 13 193 198
962 14 193 200
963 14 198 201
964 11 192 193
965 12 192 194
966 11 197 198
967 12 197 199
968 6 197 275
969 15 194 199
970 23 219 220
971 23 219 221
972 24 219 222
973 23 216 217
974 23 216 218
975 24 216 219
976 21 213 214
977 21 213 215
978 22 213 216
979 17 203 204
980 18 203 208
981 20 212 213
982 17 204 205
983 19 204 212
984 16 205 206
985 18 205 209
986 16 206 207
987 18 206 210
988 7 190 191
989 8 190 194
990 10 196 238
991 9 191 196
992 10 191 202
993 16 238 239
994 16 238 243
995 18 243 247
996 16 242 243
997 18 242 246
998 16 202 203
999 16 202 207
1000 18 207 211
1001 7 195 196
1002 8 195 199
1003 26 270 271
1004 26 270 272
1005 26 270 273
1006 23 137 138
1007 23 137 139
1008 24 137 140
1009 23 128 129
1010 23 128 130
1011 24 128 131
1012 23 125 126
1013 23 125 127
1014 24 125 128
1015 21 122 123
1016 21 122 124
1017 22 122 125
1018 17 113 114
1019 19 113 121
1020 20 121 122
1021 16 114 115
1022 18 114 118
1023 16 115 116
1024 18 115 119
1025 17 112 113
1026 18 112 117
1027 10 105 147
1028 7 104 105
1029 8 104 108
1030 16 111 112
1031 16 111 116
1032 7 99 100
1033 8 99 103
1034 9 100 105
1035 10 100 111
1036 6 96 101
1037 18 116 120
1038 1 92 93
1039 1 92 96
1040 11 101 102
1041 12 101 103
1042 15 103 108
1043 11 106 107
1044 12 106 108
1045 6 106 184
1046 13 102 107
1047 14 102 109
1048 14 107 110
1049 4 185 186
1050 5 185 188
1051 2 184 185
1052 26 88 89
1053 26 88 90
1054 26 88 91
1055 2 95 96
1056 5 95 98
1057 14 16 19
1058 11 15 16
1059 12 15 17
1060 6 15 93
1061 4 94 95
1062 5 94 97
1063 2 93 94
1064 23 76 77
1065 23 76 78
1066 24 76 79
1067 23 70 71
1068 23 70 72
1069 24 70 73
1070 23 73 74
1071 23 73 75
1072 24 73 76
1073 23 79 80
1074 23 79 81
1075 24 79 82
1076 23 85 86
1077 23 85 87
1078 25 85 88
1079 23 82 83
1080 23 82 84
1081 24 82 85
1082 13 11 16
1083 14 11 18
1084 2 4 5
1085 5 4 7
1086 4 3 4
1087 5 3 6
1088 2 2 3
1089 3 2 1093
1090 6 5 10
1091 11 10 11
1092 12 10 12
1093 1 1 2
1094 1 1 5
1095 15 12 17
1096 7 13 14
1097 8 13 17
1098 7 8 9
1099 8 8 12
1100 17 21 22
1101 18 21 26
1102 18 25 29
1103 16 20 21
1104 16 20 25
1105 9 9 14
1106 10 9 20
1107 10 14 56
1108 17 22 23
1109 19 22 30
1110 16 56 57
1111 16 56 61
1112 16 59 60
1113 18 59 63
1114 16 60 61
1115 18 60 64
1116 20 66 67
1117 17 58 59
1118 19 58 66
1119 18 61 65
1120 21 67 68
1121 21 67 69
1122 22 67 70
1123 17 57 58
1124 18 57 62
1125 20 30 31
1126 16 23 24
1127 18 23 27
1128 16 24 25
1129 18 24 28
1130 23 40 41
1131 23 40 42
1132 24 40 43
1133 23 37 38
1134 23 37 39
1135 24 37 40
1136 23 43 44
1137 23 43 45
1138 24 43 46
1139 26 52 53
1140 26 52 54
1141 26 52 55
1142 23 49 50
1143 23 49 51
1144 25 49 52
1145 23 46 47
1146 23 46 48
1147 24 46 49
1148 23 34 35
1149 23 34 36
1150 24 34 37
1151 26 1089 1090
1152 26 1089 1091
1153 26 1089 1092

Angles

1 35 977 980 981
2 35 977 980 982
3 36 977 980 983
4 37 981 980 982
5 38 981 980 983
6 38 982 980 983
7 31 976 977 978
8 31 976 977 979
9 32 976 977 980
10 33 978 977 979
11 34 978 977 980
12 34 979 977 980
13 17 1011 1012 1017
14 18 1011 1012 1019
15 19 1017 1012 1019
16 21 1013 1018 1014
17 22 1013 1018 1016
18 20 1014 1018 1016
19 16 1017 1016 1018
20 44 1017 1016 1094
21 45 1018 1016 1094
22 17 1012 1017 1016
23 19 1012 1017 1020
24 18 1016 1017 1020
25 5 1004 1005 1006
26 7 1004 1005 1008
27 6 1006 1005 1008
28 14 1006 1011 1012
29 15 1006 1011 1013
30 16 1012 1011 1013
31 2 1002 1006 1005
32 8 1002 1006 1011
33 9 1005 1006 1011
34 10 1010 1009 1013
35 20 1009 1013 1011
36 21 1009 1013 1018
37 22 1011 1013 1018
38 10 1015 1014 1018
39 24 1057 1062 1061
40 26 1057 1062 1066
41 26 1061 1062 1066
42 24 1060 1061 1062
43 26 1060 1061 1065
44 26 1062 1061 1065
45 11 1009 1010 1015
46 12 1009 1010 1021
47 13 1015 1010 1021
48 11 1010 1015 1014
49 13 1010 1015 1057
50 12 1014 1015 1057
51 28 1058 1059 1060
52 29 1058 1059 1067
53 29 1060 1059 1067
54 23 1015 1057 1058
55 23 1015 1057 1062
56 24 1058 1057 1062
57 25 1057 1058 1059
58 26 1057 1058 1063
59 27 1059 1058 1063
60 30 1059 1067 1068
61 38 1071 1074 1075
62 38 1071 1074 1076
63 39 1071 1074 1077
64 37 1075 1074 1076
65 38 1075 1074 1077
66 38 1076 1074 1077
67 35 1068 1071 1072
68 35 1068 1071 1073
69 36 1068 1071 1074
70 37 1072 1071 1073
71 38 1072 1071 1074
72 38 1073 1071 1074
73 31 1067 1068 1069
74 31 1067 1068 1070
75 32 1067 1068 1071
76 33 1069 1068 1070
77 34 1069 1068 1071
78 34 1070 1068 1071
79 25 1059 1060 1061
80 27 1059 1060 1064
81 26 1061 1060 1064
82 38 1074 1077 1078
83 38 1074 1077 1079
84 39 1074 1077 1080
85 37 1078 1077 1079
86 38 1078 1077 1080
87 38 1079 1077 1080
88 38 1083 1086 1087
89 38 1083 1086 1088
90 40 1083 1086 1089
91 37 1087 1086 1088
92 41 1087 1086 1089
93 41 1088 1086 1089
94 38 1080 1083 1084
95 38 1080 1083 1085
96 39 1080 1083 1086
97 37 1084 1083 1085
98 38 1084 1083 1086
99 38 1085 1083 1086
100 38 1077 1080 1081
101 38 1077 1080 1082
102 39 1077 1080 1083
103 37 1081 1080 1082
104 38 1081 1080 1083
105 38 1082 1080 1083
106 38 983 986 987
107 38 983 986 988
108 39 983 986 989
109 37 987 986 988
110 38 987 986 989
111 38 988 986 989
112 38 986 989 990
113 38 986 989 991
114 39 986 989 992
115 37 990 989 991
116 38 990 989 992
117 38 991 989 992
118 42 995 998 999
119 42 995 998 1000
120 42 995 998 1001
121 43 999 998 1000
122 43 999 998 1001
123 43 1000 998 1001
124 38 992 995 996
125 38 992 995 997
126 40 992 995 998
127 37 996 995 997
128 41 996 995 998
129 41 997 995 998
130 38 989 992 993
131 38 989 992 994
132 39 989 992 995
133 37 993 992 994
134 38 993 992 995
135 38 994 992 995
136 30 932 940 941
137 31 940 941 942
138 31 940 941 943
139 32 940 941 944
140 33 942 941 943
141 34 942 941 944
142 34 943 941 944
143 35 941 944 945
144 35 941 944 946
145 36 941 944 947
146 37 945 944 946
147 38 945 944 947
148 38 946 944 947
149 38 944 947 948
150 38 944 947 949
151 39 944 947 950
152 37 948 947 949
153 38 948 947 950
154 38 949 947 950
155 38 947 950 951
156 38 947 950 952
157 39 947 950 953
158 37 951 950 952
159 38 951 950 953
160 38 952 950 953
161 38 950 953 954
162 38 950 953 955
163 39 950 953 956
164 37 954 953 955
165 38 954 953 956
166 38 955 953 956
167 38 980 983 984
168 38 980 983 985
169 39 980 983 986
170 37 984 983 985
171 38 984 983 986
172 38 985 983 986
173 30 968 976 977
174 28 967 968 969
175 29 967 968 976
176 29 969 968 976
177 25 968 969 970
178 27 968 969 973
179 26 970 969 973
180 25 966 967 968
181 26 966 967 972
182 27 968 967 972
183 24 878 879 880
184 26 878 879 883
185 26 880 879 883
186 25 877 878 879
187 27 877 878 882
188 26 879 878 882
189 24 875 880 879
190 26 875 880 884
191 26 879 880 884
192 25 930 931 932
193 26 930 931 936
194 27 932 931 936
195 28 931 932 933
196 29 931 932 940
197 29 933 932 940
198 28 876 877 878
199 29 876 877 885
200 29 878 877 885
201 25 875 876 877
202 26 875 876 881
203 27 877 876 881
204 23 924 966 967
205 23 924 966 971
206 24 967 966 971
207 10 924 923 927
208 11 919 924 923
209 13 919 924 966
210 12 923 924 966
211 11 918 919 924
212 12 918 919 930
213 13 924 919 930
214 24 930 935 934
215 26 930 935 939
216 26 934 935 939
217 23 919 930 931
218 23 919 930 935
219 24 931 930 935
220 10 919 918 922
221 24 966 971 970
222 26 966 971 975
223 26 970 971 975
224 24 969 970 971
225 26 969 970 974
226 26 971 970 974
227 38 889 892 893
228 38 889 892 894
229 39 889 892 895
230 37 893 892 894
231 38 893 892 895
232 38 894 892 895
233 38 892 895 896
234 38 892 895 897
235 39 892 895 898
236 37 896 895 897
237 38 896 895 898
238 38 897 895 898
239 38 895 898 899
240 38 895 898 900
241 39 895 898 901
242 37 899 898 900
243 38 899 898 901
244 38 900 898 901
245 1 1003 1002 1006
246 35 886 889 890
247 35 886 889 891
248 36 886 889 892
249 37 890 889 891
250 38 890 889 892
251 38 891 889 892
252 31 885 886 887
253 31 885 886 888
254 32 885 886 889
255 33 887 886 888
256 34 887 886 889
257 34 888 886 889
258 30 877 885 886
259 14 915 920 921
260 15 915 920 922
261 16 921 920 922
262 20 918 922 920
263 21 918 922 927
264 22 920 922 927
265 5 1003 1004 1005
266 6 1003 1004 1007
267 7 1005 1004 1007
268 16 926 925 927
269 14 926 925 1003
270 15 927 925 1003
271 21 922 927 923
272 22 922 927 925
273 20 923 927 925
274 8 925 1003 1002
275 9 925 1003 1004
276 2 1002 1003 1004
277 17 921 926 925
278 19 921 926 929
279 18 925 926 929
280 17 920 921 926
281 18 920 921 928
282 19 926 921 928
283 38 898 901 902
284 38 898 901 903
285 39 898 901 904
286 37 902 901 903
287 38 902 901 904
288 38 903 901 904
289 38 901 904 905
290 38 901 904 906
291 40 901 904 907
292 37 905 904 906
293 41 905 904 907
294 41 906 904 907
295 42 904 907 908
296 42 904 907 909
297 42 904 907 910
298 43 908 907 909
299 43 908 907 910
300 43 909 907 910
301 35 1032 1035 1036
302 35 1032 1035 1037
303 36 1032 1035 1038
304 37 1036 1035 1037
305 38 1036 1035 1038
306 38 1037 1035 1038
307 38 1035 1038 1039
308 38 1035 1038 1040
309 39 1035 1038 1041
310 37 1039 1038 1040
311 38 1039 1038 1041
312 38 1040 1038 1041
313 31 1031 1032 1033
314 31 1031 1032 1034
315 32 1031 1032 1035
316 33 1033 1032 1034
317 34 1033 1032 1035
318 34 1034 1032 1035
319 23 1010 1021 1022
320 23 1010 1021 1026
321 24 1022 1021 1026
322 25 1021 1022 1023
323 26 1021 1022 1027
324 27 1023 1022 1027
325 28 1022 1023 1024
326 29 1022 1023 1031
327 29 1024 1023 1031
328 24 1021 1026 1025
329 26 1021 1026 1030
330 26 1025 1026 1030
331 30 1023 1031 1032
332 25 1023 1024 1025
333 27 1023 1024 1028
334 26 1025 1024 1028
335 24 1024 1025 1026
336 26 1024 1025 1029
337 26 1026 1025 1029
338 31 30 31 32
339 31 30 31 33
340 32 30 31 34
341 33 32 31 33
342 34 32 31 34
343 34 33 31 34
344 38 865 868 869
345 38 865 868 870
346 40 865 868 871
347 37 869 868 870
348 41 869 868 871
349 41 870 868 871
350 35 850 853 854
351 35 850 853 855
352 36 850 853 856
353 37 854 853 855
354 38 854 853 856
355 38 855 853 856
356 38 853 856 857
357 38 853 856 858
358 39 853 856 859
359 37 857 856 858
360 38 857 856 859
361 38 858 856 859
362 24 784 789 788
363 26 784 789 793
364 26 788 789 793
365 30 841 849 850
366 31 849 850 851
367 31 849 850 852
368 32 849 850 853
369 33 851 850 852
370 34 851 850 853
371 34 852 850 853
372 38 956 959 960
373 38 956 959 961
374 40 956 959 962
375 37 960 959 961
376 41 960 959 962
377 41 961 959 962
378 38 953 956 957
379 38 953 956 958
380 39 953 956 959
381 37 957 956 958
382 38 957 956 959
383 38 958 956 959
384 42 959 962 963
385 42 959 962 964
386 42 959 962 965
387 43 963 962 964
388 43 963 962 965
389 43 964 962 965
390 24 787 788 789
391 26 787 788 792
392 26 789 788 792
393 25 786 787 788
394 27 786 787 791
395 26 788 787 791
396 24 842 843 844
397 26 842 843 847
398 26 844 843 847
399 24 839 844 843
400 26 839 844 848
401 26 843 844 848
402 25 841 842 843
403 27 841 842 846
404 26 843 842 846
405 28 840 841 842
406 29 840 841 849
407 29 842 841 849
408 11 827 828 833
409 12 827 828 839
410 13 833 828 839
411 23 828 839 840
412 23 828 839 844
413 24 840 839 844
414 25 839 840 841
415 26 839 840 845
416 27 841 840 845
417 31 794 795 796
418 31 794 795 797
419 32 794 795 798
420 33 796 795 797
421 34 796 795 798
422 34 797 795 798
423 28 785 786 787
424 29 785 786 794
425 29 787 786 794
426 30 786 794 795
427 35 795 798 799
428 35 795 798 800
429 36 795 798 801
430 37 799 798 800
431 38 799 798 801
432 38 800 798 801
433 10 828 827 831
434 23 833 875 876
435 23 833 875 880
436 24 876 875 880
437 24 933 934 935
438 26 933 934 938
439 26 935 934 938
440 25 932 933 934
441 27 932 933 937
442 26 934 933 937
443 11 828 833 832
444 13 828 833 875
445 12 832 833 875
446 10 833 832 836
447 20 827 831 829
448 21 827 831 836
449 22 829 831 836
450 14 824 829 830
451 15 824 829 831
452 16 830 829 831
453 21 831 836 832
454 22 831 836 834
455 20 832 836 834
456 17 829 830 835
457 18 829 830 837
458 19 835 830 837
459 38 798 801 802
460 38 798 801 803
461 39 798 801 804
462 37 802 801 803
463 38 802 801 804
464 38 803 801 804
465 38 804 807 808
466 38 804 807 809
467 39 804 807 810
468 37 808 807 809
469 38 808 807 810
470 38 809 807 810
471 38 801 804 805
472 38 801 804 806
473 39 801 804 807
474 37 805 804 806
475 38 805 804 807
476 38 806 804 807
477 1 912 911 915
478 2 911 915 914
479 8 911 915 920
480 9 914 915 920
481 5 913 914 915
482 7 913 914 917
483 6 915 914 917
484 8 834 912 911
485 9 834 912 913
486 2 911 912 913
487 16 835 834 836
488 14 835 834 912
489 15 836 834 912
490 5 912 913 914
491 6 912 913 916
492 7 914 913 916
493 17 830 835 834
494 19 830 835 838
495 18 834 835 838
496 38 1038 1041 1042
497 38 1038 1041 1043
498 39 1038 1041 1044
499 37 1042 1041 1043
500 38 1042 1041 1044
501 38 1043 1041 1044
502 38 1041 1044 1045
503 38 1041 1044 1046
504 39 1041 1044 1047
505 37 1045 1044 1046
506 38 1045 1044 1047
507 38 1046 1044 1047
508 38 1044 1047 1048
509 38 1044 1047 1049
510 39 1044 1047 1050
511 37 1048 1047 1049
512 38 1048 1047 1050
513 38 1049 1047 1050
514 38 1047 1050 1051
515 38 1047 1050 1052
516 40 1047 1050 1053
517 37 1051 1050 1052
518 41 1051 1050 1053
519 41 1052 1050 1053
520 42 1050 1053 1054
521 42 1050 1053 1055
522 42 1050 1053 1056
523 43 1054 1053 1055
524 43 1054 1053 1056
525 43 1055 1053 1056
526 42 777 780 781
527 42 777 780 782
528 42 777 780 783
529 43 781 780 782
530 43 781 780 783
531 43 782 780 783
532 38 762 765 766
533 38 762 765 767
534 39 762 765 768
535 37 766 765 767
536 38 766 765 768
537 38 767 765 768
538 38 765 768 769
539 38 765 768 770
540 39 765 768 771
541 37 769 768 770
542 38 769 768 771
543 38 770 768 771
544 38 771 774 775
545 38 771 774 776
546 39 771 774 777
547 37 775 774 776
548 38 775 774 777
549 38 776 774 777
550 38 774 777 778
551 38 774 777 779
552 40 774 777 780
553 37 778 777 779
554 41 778 777 780
555 41 779 777 780
556 38 768 771 772
557 38 768 771 773
558 39 768 771 774
559 37 772 771 773
560 38 772 771 774
561 38 773 771 774
562 31 758 759 760
563 31 758 759 761
564 32 758 759 762
565 33 760 759 761
566 34 760 759 762
567 34 761 759 762
568 35 759 762 763
569 35 759 762 764
570 36 759 762 765
571 37 763 762 764
572 38 763 762 765
573 38 764 762 765
574 42 868 871 872
575 42 868 871 873
576 42 868 871 874
577 43 872 871 873
578 43 872 871 874
579 43 873 871 874
580 30 750 758 759
581 25 750 751 752
582 27 750 751 755
583 26 752 751 755
584 24 751 752 753
585 26 751 752 756
586 26 753 752 756
587 5 730 731 732
588 6 730 731 734
589 7 732 731 734
590 28 749 750 751
591 29 749 750 758
592 29 751 750 758
593 25 748 749 750
594 26 748 749 754
595 27 750 749 754
596 23 737 748 749
597 23 737 748 753
598 24 749 748 753
599 24 748 753 752
600 26 748 753 757
601 26 752 753 757
602 38 856 859 860
603 38 856 859 861
604 39 856 859 862
605 37 860 859 861
606 38 860 859 862
607 38 861 859 862
608 11 737 742 741
609 13 737 742 784
610 12 741 742 784
611 11 736 737 742
612 12 736 737 748
613 13 742 737 748
614 5 731 732 733
615 7 731 732 735
616 6 733 732 735
617 2 729 733 732
618 8 729 733 738
619 9 732 733 738
620 10 737 736 740
621 21 740 745 741
622 22 740 745 743
623 20 741 745 743
624 20 736 740 738
625 21 736 740 745
626 22 738 740 745
627 14 733 738 739
628 15 733 738 740
629 16 739 738 740
630 38 859 862 863
631 38 859 862 864
632 39 859 862 865
633 37 863 862 864
634 38 863 862 865
635 38 864 862 865
636 38 862 865 866
637 38 862 865 867
638 39 862 865 868
639 37 866 865 867
640 38 866 865 868
641 38 867 865 868
642 17 739 744 743
643 19 739 744 747
644 18 743 744 747
645 17 738 739 744
646 18 738 739 746
647 19 744 739 746
648 1 730 729 733
649 38 810 813 814
650 38 810 813 815
651 40 810 813 816
652 37 814 813 815
653 41 814 813 816
654 41 815 813 816
655 42 813 816 817
656 42 813 816 818
657 42 813 816 819
658 43 817 816 818
659 43 817 816 819
660 43 818 816 819
661 25 784 785 786
662 26 784 785 790
663 27 786 785 790
664 23 742 784 785
665 23 742 784 789
666 24 785 784 789
667 10 742 741 745
668 38 719 722 723
669 38 719 722 724
670 40 719 722 725
671 37 723 722 724
672 41 723 722 725
673 41 724 722 725
674 38 716 719 720
675 38 716 719 721
676 39 716 719 722
677 37 720 719 721
678 38 720 719 722
679 38 721 719 722
680 38 713 716 717
681 38 713 716 718
682 39 713 716 719
683 37 717 716 718
684 38 717 716 719
685 38 718 716 719
686 42 722 725 726
687 42 722 725 727
688 42 722 725 728
689 43 726 725 727
690 43 726 725 728
691 43 727 725 728
692 16 744 743 745
693 14 744 743 821
694 15 745 743 821
695 1 821 820 824
696 2 820 824 823
697 8 820 824 829
698 9 823 824 829
699 5 822 823 824
700 7 822 823 826
701 6 824 823 826
702 8 743 821 820
703 9 743 821 822
704 2 820 821 822
705 5 821 822 823
706 6 821 822 825
707 7 823 822 825
708 38 807 810 811
709 38 807 810 812
710 39 807 810 813
711 37 811 810 812
712 38 811 810 813
713 38 812 810 813
714 38 625 628 629
715 38 625 628 630
716 39 625 628 631
717 37 629 628 630
718 38 629 628 631
719 38 630 628 631
720 38 619 622 623
721 38 619 622 624
722 39 619 622 625
723 37 623 622 624
724 38 623 622 625
725 38 624 622 625
726 38 616 619 620
727 38 616 619 621
728 39 616 619 622
729 37 620 619 621
730 38 620 619 622
731 38 621 619 622
732 38 622 625 626
733 38 622 625 627
734 39 622 625 628
735 37 626 625 627
736 38 626 625 628
737 38 627 625 628
738 35 613 616 617
739 35 613 616 618
740 36 613 616 619
741 37 617 616 618
742 38 617 616 619
743 38 618 616 619
744 31 612 613 614
745 31 612 613 615
746 32 612 613 616
747 33 614 613 615
748 34 614 613 616
749 34 615 613 616
750 30 604 612 613
751 25 604 605 606
752 27 604 605 609
753 26 606 605 609
754 28 603 604 605
755 29 603 604 612
756 29 605 604 612
757 24 605 606 607
758 26 605 606 610
759 26 607 606 610
760 25 602 603 604
761 26 602 603 608
762 27 604 603 608
763 38 537 540 541
764 38 537 540 542
765 40 537 540 543
766 37 541 540 542
767 41 541 540 543
768 41 542 540 543
769 38 534 537 538
770 38 534 537 539
771 39 534 537 540
772 37 538 537 539
773 38 538 537 540
774 38 539 537 540
775 38 531 534 535
776 38 531 534 536
777 39 531 534 537
778 37 535 534 536
779 38 535 534 537
780 38 536 534 537
781 20 645 649 647
782 21 645 649 654
783 22 647 649 654
784 10 646 645 649
785 2 638 642 641
786 8 638 642 647
787 9 641 642 647
788 14 642 647 648
789 15 642 647 649
790 16 648 647 649
791 17 647 648 653
792 18 647 648 655
793 19 653 648 655
794 5 640 641 642
795 7 640 641 644
796 6 642 641 644
797 17 648 653 652
798 19 648 653 656
799 18 652 653 656
800 5 639 640 641
801 6 639 640 643
802 7 641 640 643
803 42 540 543 544
804 42 540 543 545
805 42 540 543 546
806 43 544 543 545
807 43 544 543 546
808 43 545 543 546
809 8 652 730 729
810 9 652 730 731
811 2 729 730 731
812 16 653 652 654
813 14 653 652 730
814 15 654 652 730
815 21 649 654 650
816 22 649 654 652
817 20 650 654 652
818 10 651 650 654
819 11 645 646 651
820 12 645 646 657
821 13 651 646 657
822 23 651 693 694
823 23 651 693 698
824 24 694 693 698
825 11 646 651 650
826 13 646 651 693
827 12 650 651 693
828 28 694 695 696
829 29 694 695 703
830 29 696 695 703
831 30 695 703 704
832 31 703 704 705
833 31 703 704 706
834 32 703 704 707
835 33 705 704 706
836 34 705 704 707
837 34 706 704 707
838 25 693 694 695
839 26 693 694 699
840 27 695 694 699
841 24 693 698 697
842 26 693 698 702
843 26 697 698 702
844 24 696 697 698
845 26 696 697 701
846 26 698 697 701
847 25 695 696 697
848 27 695 696 700
849 26 697 696 700
850 23 646 657 658
851 23 646 657 662
852 24 658 657 662
853 24 657 662 661
854 26 657 662 666
855 26 661 662 666
856 35 704 707 708
857 35 704 707 709
858 36 704 707 710
859 37 708 707 709
860 38 708 707 710
861 38 709 707 710
862 38 707 710 711
863 38 707 710 712
864 39 707 710 713
865 37 711 710 712
866 38 711 710 713
867 38 712 710 713
868 38 710 713 714
869 38 710 713 715
870 39 710 713 716
871 37 714 713 715
872 38 714 713 716
873 38 715 713 716
874 38 592 595 596
875 38 592 595 597
876 40 592 595 598
877 37 596 595 597
878 41 596 595 598
879 41 597 595 598
880 42 595 598 599
881 42 595 598 600
882 42 595 598 601
883 43 599 598 600
884 43 599 598 601
885 43 600 598 601
886 35 577 580 581
887 35 577 580 582
888 36 577 580 583
889 37 581 580 582
890 38 581 580 583
891 38 582 580 583
892 38 586 589 590
893 38 586 589 591
894 39 586 589 592
895 37 590 589 591
896 38 590 589 592
897 38 591 589 592
898 38 589 592 593
899 38 589 592 594
900 39 589 592 595
901 37 593 592 594
902 38 593 592 595
903 38 594 592 595
904 38 580 583 584
905 38 580 583 585
906 39 580 583 586
907 37 584 583 585
908 38 584 583 586
909 38 585 583 586
910 38 583 586 587
911 38 583 586 588
912 39 583 586 589
913 37 587 586 588
914 38 587 586 589
915 38 588 586 589
916 31 576 577 578
917 31 576 577 579
918 32 576 577 580
919 33 578 577 579
920 34 578 577 580
921 34 579 577 580
922 42 631 634 635
923 42 631 634 636
924 42 631 634 637
925 43 635 634 636
926 43 635 634 637
927 43 636 634 637
928 38 628 631 632
929 38 628 631 633
930 40 628 631 634
931 37 632 631 633
932 41 632 631 634
933 41 633 631 634
934 25 568 569 570
935 27 568 569 573
936 26 570 569 573
937 24 514 515 516
938 26 514 515 519
939 26 516 515 519
940 25 513 514 515
941 27 513 514 518
942 26 515 514 518
943 28 512 513 514
944 29 512 513 521
945 29 514 513 521
946 24 602 607 606
947 26 602 607 611
948 26 606 607 611
949 23 560 602 603
950 23 560 602 607
951 24 603 602 607
952 23 555 566 567
953 23 555 566 571
954 24 567 566 571
955 11 555 560 559
956 13 555 560 602
957 12 559 560 602
958 11 554 555 560
959 12 554 555 566
960 13 560 555 566
961 10 560 559 563
962 20 554 558 556
963 21 554 558 563
964 22 556 558 563
965 10 555 554 558
966 30 568 576 577
967 28 567 568 569
968 29 567 568 576
969 29 569 568 576
970 25 566 567 568
971 26 566 567 572
972 27 568 567 572
973 24 569 570 571
974 26 569 570 574
975 26 571 570 574
976 24 566 571 570
977 26 566 571 575
978 26 570 571 575
979 38 528 531 532
980 38 528 531 533
981 39 528 531 534
982 37 532 531 533
983 38 532 531 534
984 38 533 531 534
985 35 522 525 526
986 35 522 525 527
987 36 522 525 528
988 37 526 525 527
989 38 526 525 528
990 38 527 525 528
991 30 513 521 522
992 31 521 522 523
993 31 521 522 524
994 32 521 522 525
995 33 523 522 524
996 34 523 522 525
997 34 524 522 525
998 21 558 563 559
999 22 558 563 561
1000 20 559 563 561
1001 38 525 528 529
1002 38 525 528 530
1003 39 525 528 531
1004 37 529 528 530
1005 38 529 528 531
1006 38 530 528 531
1007 14 551 556 557
1008 15 551 556 558
1009 16 557 556 558
1010 1 639 638 642
1011 8 561 639 638
1012 9 561 639 640
1013 2 638 639 640
1014 16 562 561 563
1015 14 562 561 639
1016 15 563 561 639
1017 17 557 562 561
1018 19 557 562 565
1019 18 561 562 565
1020 17 556 557 562
1021 18 556 557 564
1022 19 562 557 564
1023 31 667 668 669
1024 31 667 668 670
1025 32 667 668 671
1026 33 669 668 670
1027 34 669 668 671
1028 34 670 668 671
1029 35 668 671 672
1030 35 668 671 673
1031 36 668 671 674
1032 37 672 671 673
1033 38 672 671 674
1034 38 673 671 674
1035 38 671 674 675
1036 38 671 674 676
1037 39 671 674 677
1038 37 675 674 676
1039 38 675 674 677
1040 38 676 674 677
1041 25 657 658 659
1042 26 657 658 663
1043 27 659 658 663
1044 24 660 661 662
1045 26 660 661 665
1046 26 662 661 665
1047 25 659 660 661
1048 27 659 660 664
1049 26 661 660 664
1050 28 658 659 660
1051 29 658 659 667
1052 29 660 659 667
1053 30 659 667 668
1054 31 485 486 487
1055 31 485 486 488
1056 32 485 486 489
1057 33 487 486 488
1058 34 487 486 489
1059 34 488 486 489
1060 30 477 485 486
1061 24 511 516 515
1062 26 511 516 520
1063 26 515 516 520
1064 23 469 511 512
1065 23 469 511 516
1066 24 512 511 516
1067 25 511 512 513
1068 26 511 512 517
1069 27 513 512 517
1070 11 464 469 468
1071 13 464 469 511
1072 12 468 469 511
1073 11 463 464 469
1074 12 463 464 475
1075 13 469 464 475
1076 24 478 479 480
1077 26 478 479 483
1078 26 480 479 483
1079 28 476 477 478
1080 29 476 477 485
1081 29 478 477 485
1082 25 475 476 477
1083 26 475 476 481
1084 27 477 476 481
1085 25 477 478 479
1086 27 477 478 482
1087 26 479 478 482
1088 23 464 475 476
1089 23 464 475 480
1090 24 476 475 480
1091 24 475 480 479
1092 26 475 480 484
1093 26 479 480 484
1094 10 464 463 467
1095 10 469 468 472
1096 1 548 547 551
1097 16 471 470 472
1098 14 471 470 548
1099 15 472 470 548
1100 21 467 472 468
1101 22 467 472 470
1102 20 468 472 470
1103 8 470 548 547
1104 9 470 548 549
1105 2 547 548 549
1106 17 466 471 470
1107 19 466 471 474
1108 18 470 471 474
1109 20 463 467 465
1110 21 463 467 472
1111 22 465 467 472
1112 14 460 465 466
1113 15 460 465 467
1114 16 466 465 467
1115 17 465 466 471
1116 18 465 466 473
1117 19 471 466 473
1118 35 486 489 490
1119 35 486 489 491
1120 36 486 489 492
1121 37 490 489 491
1122 38 490 489 492
1123 38 491 489 492
1124 38 489 492 493
1125 38 489 492 494
1126 39 489 492 495
1127 37 493 492 494
1128 38 493 492 495
1129 38 494 492 495
1130 38 492 495 496
1131 38 492 495 497
1132 39 492 495 498
1133 37 496 495 497
1134 38 496 495 498
1135 38 497 495 498
1136 38 495 498 499
1137 38 495 498 500
1138 39 495 498 501
1139 37 499 498 500
1140 38 499 498 501
1141 38 500 498 501
1142 38 498 501 502
1143 38 498 501 503
1144 39 498 501 504
1145 37 502 501 503
1146 38 502 501 504
1147 38 503 501 504
1148 42 686 689 690
1149 42 686 689 691
1150 42 686 689 692
1151 43 690 689 691
1152 43 690 689 692
1153 43 691 689 692
1154 38 683 686 687
1155 38 683 686 688
1156 40 683 686 689
1157 37 687 686 688
1158 41 687 686 689
1159 41 688 686 689
1160 38 677 680 681
1161 38 677 680 682
1162 39 677 680 683
1163 37 681 680 682
1164 38 681 680 683
1165 38 682 680 683
1166 38 680 683 684
1167 38 680 683 685
1168 39 680 683 686
1169 37 684 683 685
1170 38 684 683 686
1171 38 685 683 686
1172 5 548 549 550
1173 6 548 549 552
1174 7 550 549 552
1175 2 547 551 550
1176 8 547 551 556
1177 9 550 551 556
1178 5 549 550 551
1179 7 549 550 553
1180 6 551 550 553
1181 38 674 677 678
1182 38 674 677 679
1183 39 674 677 680
1184 37 678 677 679
1185 38 678 677 680
1186 38 679 677 680
1187 38 501 504 505
1188 38 501 504 506
1189 40 501 504 507
1190 37 505 504 506
1191 41 505 504 507
1192 41 506 504 507
1193 42 504 507 508
1194 42 504 507 509
1195 42 504 507 510
1196 43 508 507 509
1197 43 508 507 510
1198 43 509 507 510
1199 17 374 375 380
1200 18 374 375 382
1201 19 380 375 382
1202 11 373 378 377
1203 13 373 378 420
1204 12 377 378 420
1205 23 378 420 421
1206 23 378 420 425
1207 24 421 420 425
1208 20 372 376 374
1209 21 372 376 381
1210 22 374 376 381
1211 11 372 373 378
1212 12 372 373 384
1213 13 378 373 384
1214 21 376 381 377
1215 22 376 381 379
1216 20 377 381 379
1217 24 420 425 424
1218 26 420 425 429
1219 26 424 425 429
1220 24 423 424 425
1221 26 423 424 428
1222 26 425 424 428
1223 25 422 423 424
1224 27 422 423 427
1225 26 424 423 427
1226 5 458 459 460
1227 7 458 459 462
1228 6 460 459 462
1229 5 457 458 459
1230 6 457 458 461
1231 7 459 458 461
1232 17 375 380 379
1233 19 375 380 383
1234 18 379 380 383
1235 1 457 456 460
1236 2 456 460 459
1237 8 456 460 465
1238 9 459 460 465
1239 8 379 457 456
1240 9 379 457 458
1241 2 456 457 458
1242 16 380 379 381
1243 14 380 379 457
1244 15 381 379 457
1245 10 378 377 381
1246 25 420 421 422
1247 26 420 421 426
1248 27 422 421 426
1249 28 421 422 423
1250 29 421 422 430
1251 29 423 422 430
1252 30 422 430 431
1253 31 430 431 432
1254 31 430 431 433
1255 32 430 431 434
1256 33 432 431 433
1257 34 432 431 434
1258 34 433 431 434
1259 35 431 434 435
1260 35 431 434 436
1261 36 431 434 437
1262 37 435 434 436
1263 38 435 434 437
1264 38 436 434 437
1265 38 437 440 441
1266 38 437 440 442
1267 39 437 440 443
1268 37 441 440 442
1269 38 441 440 443
1270 38 442 440 443
1271 38 434 437 438
1272 38 434 437 439
1273 39 434 437 440
1274 37 438 437 439
1275 38 438 437 440
1276 38 439 437 440
1277 38 319 322 323
1278 38 319 322 324
1279 40 319 322 325
1280 37 323 322 324
1281 41 323 322 325
1282 41 324 322 325
1283 38 316 319 320
1284 38 316 319 321
1285 39 316 319 322
1286 37 320 319 321
1287 38 320 319 322
1288 38 321 319 322
1289 24 332 333 334
1290 26 332 333 337
1291 26 334 333 337
1292 25 331 332 333
1293 27 331 332 336
1294 26 333 332 336
1295 24 329 334 333
1296 26 329 334 338
1297 26 333 334 338
1298 23 287 329 330
1299 23 287 329 334
1300 24 330 329 334
1301 28 330 331 332
1302 29 330 331 339
1303 29 332 331 339
1304 1 366 365 369
1305 25 329 330 331
1306 26 329 330 335
1307 27 331 330 335
1308 11 282 287 286
1309 13 282 287 329
1310 12 286 287 329
1311 10 287 286 290
1312 21 285 290 286
1313 22 285 290 288
1314 20 286 290 288
1315 8 288 366 365
1316 9 288 366 367
1317 2 365 366 367
1318 5 366 367 368
1319 6 366 367 370
1320 7 368 367 370
1321 14 369 374 375
1322 15 369 374 376
1323 16 375 374 376
1324 2 365 369 368
1325 8 365 369 374
1326 9 368 369 374
1327 5 367 368 369
1328 7 367 368 371
1329 6 369 368 371
1330 10 373 372 376
1331 31 394 395 396
1332 31 394 395 397
1333 32 394 395 398
1334 33 396 395 397
1335 34 396 395 398
1336 34 397 395 398
1337 35 395 398 399
1338 35 395 398 400
1339 36 395 398 401
1340 37 399 398 400
1341 38 399 398 401
1342 38 400 398 401
1343 25 384 385 386
1344 26 384 385 390
1345 27 386 385 390
1346 23 373 384 385
1347 23 373 384 389
1348 24 385 384 389
1349 16 289 288 290
1350 14 289 288 366
1351 15 290 288 366
1352 17 284 289 288
1353 19 284 289 292
1354 18 288 289 292
1355 38 398 401 402
1356 38 398 401 403
1357 39 398 401 404
1358 37 402 401 403
1359 38 402 401 404
1360 38 403 401 404
1361 30 386 394 395
1362 28 385 386 387
1363 29 385 386 394
1364 29 387 386 394
1365 25 386 387 388
1366 27 386 387 391
1367 26 388 387 391
1368 24 384 389 388
1369 26 384 389 393
1370 26 388 389 393
1371 24 387 388 389
1372 26 387 388 392
1373 26 389 388 392
1374 42 449 452 453
1375 42 449 452 454
1376 42 449 452 455
1377 43 453 452 454
1378 43 453 452 455
1379 43 454 452 455
1380 38 446 449 450
1381 38 446 449 451
1382 40 446 449 452
1383 37 450 449 451
1384 41 450 449 452
1385 41 451 449 452
1386 38 443 446 447
1387 38 443 446 448
1388 39 443 446 449
1389 37 447 446 448
1390 38 447 446 449
1391 38 448 446 449
1392 38 440 443 444
1393 38 440 443 445
1394 39 440 443 446
1395 37 444 443 445
1396 38 444 443 446
1397 38 445 443 446
1398 38 313 316 317
1399 38 313 316 318
1400 39 313 316 319
1401 37 317 316 318
1402 38 317 316 319
1403 38 318 316 319
1404 42 322 325 326
1405 42 322 325 327
1406 42 322 325 328
1407 43 326 325 327
1408 43 326 325 328
1409 43 327 325 328
1410 38 307 310 311
1411 38 307 310 312
1412 39 307 310 313
1413 37 311 310 312
1414 38 311 310 313
1415 38 312 310 313
1416 35 304 307 308
1417 35 304 307 309
1418 36 304 307 310
1419 37 308 307 309
1420 38 308 307 310
1421 38 309 307 310
1422 38 310 313 314
1423 38 310 313 315
1424 39 310 313 316
1425 37 314 313 315
1426 38 314 313 316
1427 38 315 313 316
1428 31 303 304 305
1429 31 303 304 306
1430 32 303 304 307
1431 33 305 304 306
1432 34 305 304 307
1433 34 306 304 307
1434 30 295 303 304
1435 38 161 164 165
1436 38 161 164 166
1437 39 161 164 167
1438 37 165 164 166
1439 38 165 164 167
1440 38 166 164 167
1441 35 158 161 162
1442 35 158 161 163
1443 36 158 161 164
1444 37 162 161 163
1445 38 162 161 164
1446 38 163 161 164
1447 25 295 296 297
1448 27 295 296 300
1449 26 297 296 300
1450 38 222 225 226
1451 38 222 225 227
1452 39 222 225 228
1453 37 226 225 227
1454 38 226 225 228
1455 38 227 225 228
1456 38 170 173 174
1457 38 170 173 175
1458 39 170 173 176
1459 37 174 173 175
1460 38 174 173 176
1461 38 175 173 176
1462 38 167 170 171
1463 38 167 170 172
1464 39 167 170 173
1465 37 171 170 172
1466 38 171 170 173
1467 38 172 170 173
1468 38 164 167 168
1469 38 164 167 169
1470 39 164 167 170
1471 37 168 167 169
1472 38 168 167 170
1473 38 169 167 170
1474 28 294 295 296
1475 29 294 295 303
1476 29 296 295 303
1477 25 293 294 295
1478 26 293 294 299
1479 27 295 294 299
1480 1 275 274 278
1481 8 197 275 274
1482 9 197 275 276
1483 2 274 275 276
1484 38 401 404 405
1485 38 401 404 406
1486 39 401 404 407
1487 37 405 404 406
1488 38 405 404 407
1489 38 406 404 407
1490 38 404 407 408
1491 38 404 407 409
1492 39 404 407 410
1493 37 408 407 409
1494 38 408 407 410
1495 38 409 407 410
1496 38 407 410 411
1497 38 407 410 412
1498 39 407 410 413
1499 37 411 410 412
1500 38 411 410 413
1501 38 412 410 413
1502 30 331 339 340
1503 31 339 340 341
1504 31 339 340 342
1505 32 339 340 343
1506 33 341 340 342
1507 34 341 340 343
1508 34 342 340 343
1509 24 296 297 298
1510 26 296 297 301
1511 26 298 297 301
1512 24 293 298 297
1513 26 293 298 302
1514 26 297 298 302
1515 23 282 293 294
1516 23 282 293 298
1517 24 294 293 298
1518 11 281 282 287
1519 12 281 282 293
1520 13 287 282 293
1521 31 248 249 250
1522 31 248 249 251
1523 32 248 249 252
1524 33 250 249 251
1525 34 250 249 252
1526 34 251 249 252
1527 30 240 248 249
1528 10 282 281 285
1529 20 281 285 283
1530 21 281 285 290
1531 22 283 285 290
1532 35 249 252 253
1533 35 249 252 254
1534 36 249 252 255
1535 37 253 252 254
1536 38 253 252 255
1537 38 254 252 255
1538 25 238 239 240
1539 26 238 239 244
1540 27 240 239 244
1541 28 239 240 241
1542 29 239 240 248
1543 29 241 240 248
1544 25 240 241 242
1545 27 240 241 245
1546 26 242 241 245
1547 5 276 277 278
1548 7 276 277 280
1549 6 278 277 280
1550 5 275 276 277
1551 6 275 276 279
1552 7 277 276 279
1553 2 274 278 277
1554 8 274 278 283
1555 9 277 278 283
1556 14 278 283 284
1557 15 278 283 285
1558 16 284 283 285
1559 17 283 284 289
1560 18 283 284 291
1561 19 289 284 291
1562 38 252 255 256
1563 38 252 255 257
1564 39 252 255 258
1565 37 256 255 257
1566 38 256 255 258
1567 38 257 255 258
1568 42 413 416 417
1569 42 413 416 418
1570 42 413 416 419
1571 43 417 416 418
1572 43 417 416 419
1573 43 418 416 419
1574 38 410 413 414
1575 38 410 413 415
1576 40 410 413 416
1577 37 414 413 415
1578 41 414 413 416
1579 41 415 413 416
1580 35 340 343 344
1581 35 340 343 345
1582 36 340 343 346
1583 37 344 343 345
1584 38 344 343 346
1585 38 345 343 346
1586 38 355 358 359
1587 38 355 358 360
1588 40 355 358 361
1589 37 359 358 360
1590 41 359 358 361
1591 41 360 358 361
1592 38 352 355 356
1593 38 352 355 357
1594 39 352 355 358
1595 37 356 355 357
1596 38 356 355 358
1597 38 357 355 358
1598 38 349 352 353
1599 38 349 352 354
1600 39 349 352 355
1601 37 353 352 354
1602 38 353 352 355
1603 38 354 352 355
1604 38 346 349 350
1605 38 346 349 351
1606 39 346 349 352
1607 37 350 349 351
1608 38 350 349 352
1609 38 351 349 352
1610 38 343 346 347
1611 38 343 346 348
1612 39 343 346 349
1613 37 347 346 348
1614 38 347 346 349
1615 38 348 346 349
1616 38 258 261 262
1617 38 258 261 263
1618 39 258 261 264
1619 37 262 261 263
1620 38 262 261 264
1621 38 263 261 264
1622 38 255 258 259
1623 38 255 258 260
1624 39 255 258 261
1625 37 259 258 260
1626 38 259 258 261
1627 38 260 258 261
1628 38 264 267 268
1629 38 264 267 269
1630 40 264 267 270
1631 37 268 267 269
1632 41 268 267 270
1633 41 269 267 270
1634 38 261 264 265
1635 38 261 264 266
1636 39 261 264 267
1637 37 265 264 266
1638 38 265 264 267
1639 38 266 264 267
1640 42 358 361 362
1641 42 358 361 363
1642 42 358 361 364
1643 43 362 361 363
1644 43 362 361 364
1645 43 363 361 364
1646 38 137 140 141
1647 38 137 140 142
1648 40 137 140 143
1649 37 141 140 142
1650 41 141 140 143
1651 41 142 140 143
1652 42 140 143 144
1653 42 140 143 145
1654 42 140 143 146
1655 43 144 143 145
1656 43 144 143 146
1657 43 145 143 146
1658 38 131 134 135
1659 38 131 134 136
1660 39 131 134 137
1661 37 135 134 136
1662 38 135 134 137
1663 38 136 134 137
1664 38 128 131 132
1665 38 128 131 133
1666 39 128 131 134
1667 37 132 131 133
1668 38 132 131 134
1669 38 133 131 134
1670 25 149 150 151
1671 27 149 150 154
1672 26 151 150 154
1673 24 150 151 152
1674 26 150 151 155
1675 26 152 151 155
1676 42 231 234 235
1677 42 231 234 236
1678 42 231 234 237
1679 43 235 234 236
1680 43 235 234 237
1681 43 236 234 237
1682 38 228 231 232
1683 38 228 231 233
1684 40 228 231 234
1685 37 232 231 233
1686 41 232 231 234
1687 41 233 231 234
1688 24 147 152 151
1689 26 147 152 156
1690 26 151 152 156
1691 23 105 147 148
1692 23 105 147 152
1693 24 148 147 152
1694 30 149 157 158
1695 31 157 158 159
1696 31 157 158 160
1697 32 157 158 161
1698 33 159 158 160
1699 34 159 158 161
1700 34 160 158 161
1701 25 147 148 149
1702 26 147 148 153
1703 27 149 148 153
1704 28 148 149 150
1705 29 148 149 157
1706 29 150 149 157
1707 38 225 228 229
1708 38 225 228 230
1709 39 225 228 231
1710 37 229 228 230
1711 38 229 228 231
1712 38 230 228 231
1713 38 219 222 223
1714 38 219 222 224
1715 39 219 222 225
1716 37 223 222 224
1717 38 223 222 225
1718 38 224 222 225
1719 42 176 179 180
1720 42 176 179 181
1721 42 176 179 182
1722 43 180 179 181
1723 43 180 179 182
1724 43 181 179 182
1725 38 173 176 177
1726 38 173 176 178
1727 40 173 176 179
1728 37 177 176 178
1729 41 177 176 179
1730 41 178 176 179
1731 5 185 186 187
1732 7 185 186 189
1733 6 187 186 189
1734 2 183 187 186
1735 8 183 187 192
1736 9 186 187 192
1737 1 184 183 187
1738 17 192 193 198
1739 18 192 193 200
1740 19 198 193 200
1741 17 193 198 197
1742 19 193 198 201
1743 18 197 198 201
1744 14 187 192 193
1745 15 187 192 194
1746 16 193 192 194
1747 16 198 197 199
1748 14 198 197 275
1749 15 199 197 275
1750 20 190 194 192
1751 21 190 194 199
1752 22 192 194 199
1753 38 216 219 220
1754 38 216 219 221
1755 39 216 219 222
1756 37 220 219 221
1757 38 220 219 222
1758 38 221 219 222
1759 35 213 216 217
1760 35 213 216 218
1761 36 213 216 219
1762 37 217 216 218
1763 38 217 216 219
1764 38 218 216 219
1765 31 212 213 214
1766 31 212 213 215
1767 32 212 213 216
1768 33 214 213 215
1769 34 214 213 216
1770 34 215 213 216
1771 25 202 203 204
1772 26 202 203 208
1773 27 204 203 208
1774 30 204 212 213
1775 28 203 204 205
1776 29 203 204 212
1777 29 205 204 212
1778 25 204 205 206
1779 27 204 205 209
1780 26 206 205 209
1781 24 205 206 207
1782 26 205 206 210
1783 26 207 206 210
1784 10 191 190 194
1785 21 194 199 195
1786 22 194 199 197
1787 20 195 199 197
1788 11 191 196 195
1789 13 191 196 238
1790 12 195 196 238
1791 11 190 191 196
1792 12 190 191 202
1793 13 196 191 202
1794 23 196 238 239
1795 23 196 238 243
1796 24 239 238 243
1797 24 238 243 242
1798 26 238 243 247
1799 26 242 243 247
1800 24 241 242 243
1801 26 241 242 246
1802 26 243 242 246
1803 23 191 202 203
1804 23 191 202 207
1805 24 203 202 207
1806 24 202 207 206
1807 26 202 207 211
1808 26 206 207 211
1809 10 196 195 199
1810 42 267 270 271
1811 42 267 270 272
1812 42 267 270 273
1813 43 271 270 272
1814 43 271 270 273
1815 43 272 270 273
1816 38 134 137 138
1817 38 134 137 139
1818 39 134 137 140
1819 37 138 137 139
1820 38 138 137 140
1821 38 139 137 140
1822 38 125 128 129
1823 38 125 128 130
1824 39 125 128 131
1825 37 129 128 130
1826 38 129 128 131
1827 38 130 128 131
1828 35 122 125 126
1829 35 122 125 127
1830 36 122 125 128
1831 37 126 125 127
1832 38 126 125 128
1833 38 127 125 128
1834 31 121 122 123
1835 31 121 122 124
1836 32 121 122 125
1837 33 123 122 124
1838 34 123 122 125
1839 34 124 122 125
1840 28 112 113 114
1841 29 112 113 121
1842 29 114 113 121
1843 30 113 121 122
1844 25 113 114 115
1845 27 113 114 118
1846 26 115 114 118
1847 24 114 115 116
1848 26 114 115 119
1849 26 116 115 119
1850 25 111 112 113
1851 26 111 112 117
1852 27 113 112 117
1853 11 100 105 104
1854 13 100 105 147
1855 12 104 105 147
1856 10 105 104 108
1857 23 100 111 112
1858 23 100 111 116
1859 24 112 111 116
1860 10 100 99 103
1861 11 99 100 105
1862 12 99 100 111
1863 13 105 100 111
1864 2 92 96 95
1865 8 92 96 101
1866 9 95 96 101
1867 24 111 116 115
1868 26 111 116 120
1869 26 115 116 120
1870 1 93 92 96
1871 14 96 101 102
1872 15 96 101 103
1873 16 102 101 103
1874 20 99 103 101
1875 21 99 103 108
1876 22 101 103 108
1877 21 103 108 104
1878 22 103 108 106
1879 20 104 108 106
1880 16 107 106 108
1881 14 107 106 184
1882 15 108 106 184
1883 17 101 102 107
1884 18 101 102 109
1885 19 107 102 109
1886 17 102 107 106
1887 19 102 107 110
1888 18 106 107 110
1889 5 184 185 186
1890 6 184 185 188
1891 7 186 185 188
1892 8 106 184 183
1893 9 106 184 185
1894 2 183 184 185
1895 42 85 88 89
1896 42 85 88 90
1897 42 85 88 91
1898 43 89 88 90
1899 43 89 88 91
1900 43 90 88 91
1901 5 94 95 96
1902 7 94 95 98
1903 6 96 95 98
1904 17 11 16 15
1905 19 11 16 19
1906 18 15 16 19
1907 16 16 15 17
1908 14 16 15 93
1909 15 17 15 93
1910 5 93 94 95
1911 6 93 94 97
1912 7 95 94 97
1913 8 15 93 92
1914 9 15 93 94
1915 2 92 93 94
1916 38 73 76 77
1917 38 73 76 78
1918 39 73 76 79
1919 37 77 76 78
1920 38 77 76 79
1921 38 78 76 79
1922 35 67 70 71
1923 35 67 70 72
1924 36 67 70 73
1925 37 71 70 72
1926 38 71 70 73
1927 38 72 70 73
1928 38 70 73 74
1929 38 70 73 75
1930 39 70 73 76
1931 37 74 73 75
1932 38 74 73 76
1933 38 75 73 76
1934 38 76 79 80
1935 38 76 79 81
1936 39 76 79 82
1937 37 80 79 81
1938 38 80 79 82
1939 38 81 79 82
1940 38 82 85 86
1941 38 82 85 87
1942 40 82 85 88
1943 37 86 85 87
1944 41 86 85 88
1945 41 87 85 88
1946 38 79 82 83
1947 38 79 82 84
1948 39 79 82 85
1949 37 83 82 84
1950 38 83 82 85
1951 38 84 82 85
1952 17 10 11 16
1953 18 10 11 18
1954 19 16 11 18
1955 5 3 4 5
1956 7 3 4 7
1957 6 5 4 7
1958 5 2 3 4
1959 6 2 3 6
1960 7 4 3 6
1961 2 1 2 3
1962 3 1 2 1093
1963 4 3 2 1093
1964 2 1 5 4
1965 8 1 5 10
1966 9 4 5 10
1967 14 5 10 11
1968 15 5 10 12
1969 16 11 10 12
1970 1 2 1 5
1971 21 12 17 13
1972 22 12 17 15
1973 20 13 17 15
1974 20 8 12 10
1975 21 8 12 17
1976 22 10 12 17
1977 10 14 13 17
1978 10 9 8 12
1979 25 20 21 22
1980 26 20 21 26
1981 27 22 21 26
1982 24 20 25 24
1983 26 20 25 29
1984 26 24 25 29
1985 23 9 20 21
1986 23 9 20 25
1987 24 21 20 25
1988 11 8 9 14
1989 12 8 9 20
1990 13 14 9 20
1991 11 9 14 13
1992 13 9 14 56
1993 12 13 14 56
1994 28 21 22 23
1995 29 21 22 30
1996 29 23 22 30
1997 23 14 56 57
1998 23 14 56 61
1999 24 57 56 61
2000 25 58 59 60
2001 27 58 59 63
2002 26 60 59 63
2003 24 59 60 61
2004 26 59 60 64
2005 26 61 60 64
2006 30 58 66 67
2007 28 57 58 59
2008 29 57 58 66
2009 29 59 58 66
2010 24 56 61 60
2011 26 56 61 65
2012 26 60 61 65
2013 31 66 67 68
2014 31 66 67 69
2015 32 66 67 70
2016 33 68 67 69
2017 34 68 67 70
2018 34 69 67 70
2019 25 56 57 58
2020 26 56 57 62
2021 27 58 57 62
2022 30 22 30 31
2023 25 22 23 24
2024 27 22 23 27
2025 26 24 23 27
2026 24 23 24 25
2027 26 23 24 28
2028 26 25 24 28
2029 38 37 40 41
2030 38 37 40 42
2031 39 37 40 43
2032 37 41 40 42
2033 38 41 40 43
2034 38 42 40 43
2035 38 34 37 38
2036 38 34 37 39
2037 39 34 37 40
2038 37 38 37 39
2039 38 38 37 40
2040 38 39 37 40
2041 38 40 43 44
2042 38 40 43 45
2043 39 40 43 46
2044 37 44 43 45
2045 38 44 43 46
2046 38 45 43 46
2047 42 49 52 53
2048 42 49 52 54
2049 42 49 52 55
2050 43 53 52 54
2051 43 53 52 55
2052 43 54 52 55
2053 38 46 49 50
2054 38 46 49 51
2055 40 46 49 52
2056 37 50 49 51
2057 41 50 49 52
2058 41 51 49 52
2059 38 43 46 47
2060 38 43 46 48
2061 39 43 46 49
2062 37 47 46 48
2063 38 47 46 49
2064 38 48 46 49
2065 35 31 34 35
2066 35 31 34 36
2067 36 31 34 37
2068 37 35 34 36
2069 38 35 34 37
2070 38 36 34 37
2071 42 1086 1089 1090
2072 42 1086 1089 1091
2073 42 1086 1089 1092
2074 43 1090 1089 1091
2075 43 1090 1089 1092
2076 43 1091 1089 1092

Dihedrals

1 59 977 980 983 984
2 59 977 980 983 985
3 60 977 980 983 986
4 61 981 980 983 984
5 61 981 980 983 985
6 62 981 980 983 986
7 61 982 980 983 984
8 61 982 980 983 985
9 62 982 980 983 986
10 55 976 977 980 981
11 55 976 977 980 982
12 56 976 977 980 983
13 57 978 977 980 981
14 57 978 977 980 982
15 58 978 977 980 983
16 57 979 977 980 981
17 57 979 977 980 982
18 58 979 977 980 983
19 34 1011 1012 1017 1016
20 35 1011 1012 1017 1020
21 35 1019 1012 1017 1016
22 36 1019 1012 1017 1020
23 28 1018 1016 1017 1012
24 29 1018 1016 1017 1020
25 68 1094 1016 1017 1012
26 69 1094 1016 1017 1020
27 33 1017 1016 1018 1013
28 32 1017 1016 1018 1014
29 70 1094 1016 1018 1013
30 71 1094 1016 1018 1014
31 4 1004 1005 1006 1002
32 11 1004 1005 1006 1011
33 5 1008 1005 1006 1002
34 12 1008 1005 1006 1011
35 26 1006 1011 1012 1017
36 27 1006 1011 1012 1019
37 28 1013 1011 1012 1017
38 29 1013 1011 1012 1019
39 30 1006 1011 1013 1009
40 31 1006 1011 1013 1018
41 32 1012 1011 1013 1009
42 33 1012 1011 1013 1018
43 13 1002 1006 1011 1012
44 14 1002 1006 1011 1013
45 15 1005 1006 1011 1012
46 16 1005 1006 1011 1013
47 17 1013 1009 1010 1015
48 18 1013 1009 1010 1021
49 19 1010 1009 1013 1011
50 20 1010 1009 1013 1018
51 37 1009 1013 1018 1014
52 38 1009 1013 1018 1016
53 38 1011 1013 1018 1014
54 39 1011 1013 1018 1016
55 17 1018 1014 1015 1010
56 18 1018 1014 1015 1057
57 20 1015 1014 1018 1013
58 19 1015 1014 1018 1016
59 45 1060 1061 1062 1057
60 43 1060 1061 1062 1066
61 43 1065 1061 1062 1057
62 52 1065 1061 1062 1066
63 21 1009 1010 1015 1014
64 22 1009 1010 1015 1057
65 22 1021 1010 1015 1014
66 23 1021 1010 1015 1057
67 24 1009 1010 1021 1022
68 24 1009 1010 1021 1026
69 25 1015 1010 1021 1022
70 25 1015 1010 1021 1026
71 25 1010 1015 1057 1058
72 25 1010 1015 1057 1062
73 24 1014 1015 1057 1058
74 24 1014 1015 1057 1062
75 46 1058 1059 1060 1061
76 48 1058 1059 1060 1064
77 47 1067 1059 1060 1061
78 49 1067 1059 1060 1064
79 50 1058 1059 1067 1068
80 50 1060 1059 1067 1068
81 40 1015 1057 1058 1059
82 41 1015 1057 1058 1063
83 42 1062 1057 1058 1059
84 43 1062 1057 1058 1063
85 44 1015 1057 1062 1061
86 41 1015 1057 1062 1066
87 45 1058 1057 1062 1061
88 43 1058 1057 1062 1066
89 46 1057 1058 1059 1060
90 47 1057 1058 1059 1067
91 48 1063 1058 1059 1060
92 49 1063 1058 1059 1067
93 53 1059 1067 1068 1069
94 53 1059 1067 1068 1070
95 54 1059 1067 1068 1071
96 62 1071 1074 1077 1078
97 62 1071 1074 1077 1079
98 63 1071 1074 1077 1080
99 61 1075 1074 1077 1078
100 61 1075 1074 1077 1079
101 62 1075 1074 1077 1080
102 61 1076 1074 1077 1078
103 61 1076 1074 1077 1079
104 62 1076 1074 1077 1080
105 59 1068 1071 1074 1075
106 59 1068 1071 1074 1076
107 60 1068 1071 1074 1077
108 61 1072 1071 1074 1075
109 61 1072 1071 1074 1076
110 62 1072 1071 1074 1077
111 61 1073 1071 1074 1075
112 61 1073 1071 1074 1076
113 62 1073 1071 1074 1077
114 55 1067 1068 1071 1072
115 55 1067 1068 1071 1073
116 56 1067 1068 1071 1074
117 57 1069 1068 1071 1072
118 57 1069 1068 1071 1073
119 58 1069 1068 1071 1074
120 57 1070 1068 1071 1072
121 57 1070 1068 1071 1073
122 58 1070 1068 1071 1074
123 42 1059 1060 1061 1062
124 51 1059 1060 1061 1065
125 43 1064 1060 1061 1062
126 52 1064 1060 1061 1065
127 62 1074 1077 1080 1081
128 62 1074 1077 1080 1082
129 63 1074 1077 1080 1083
130 61 1078 1077 1080 1081
131 61 1078 1077 1080 1082
132 62 1078 1077 1080 1083
133 61 1079 1077 1080 1081
134 61 1079 1077 1080 1082
135 62 1079 1077 1080 1083
136 66 1083 1086 1089 1090
137 66 1083 1086 1089 1091
138 66 1083 1086 1089 1092
139 67 1087 1086 1089 1090
140 67 1087 1086 1089 1091
141 67 1087 1086 1089 1092
142 67 1088 1086 1089 1090
143 67 1088 1086 1089 1091
144 67 1088 1086 1089 1092
145 62 1080 1083 1086 1087
146 62 1080 1083 1086 1088
147 64 1080 1083 1086 1089
148 61 1084 1083 1086 1087
149 61 1084 1083 1086 1088
150 65 1084 1083 1086 1089
151 61 1085 1083 1086 1087
152 61 1085 1083 1086 1088
153 65 1085 1083 1086 1089
154 62 1077 1080 1083 1084
155 62 1077 1080 1083 1085
156 63 1077 1080 1083 1086
157 61 1081 1080 1083 1084
158 61 1081 1080 1083 1085
159 62 1081 1080 1083 1086
160 61 1082 1080 1083 1084
161 61 1082 1080 1083 1085
162 62 1082 1080 1083 1086
163 62 983 986 989 990
164 62 983 986 989 991
165 63 983 986 989 992
166 61 987 986 989 990
167 61 987 986 989 991
168 62 987 986 989 992
169 61 988 986 989 990
170 61 988 986 989 991
171 62 988 986 989 992
172 62 986 989 992 993
173 62 986 989 992 994
174 63 986 989 992 995
175 61 990 989 992 993
176 61 990 989 992 994
177 62 990 989 992 995
178 61 991 989 992 993
179 61 991 989 992 994
180 62 991 989 992 995
181 66 992 995 998 999
182 66 992 995 998 1000
183 66 992 995 998 1001
184 67 996 995 998 999
185 67 996 995 998 1000
186 67 996 995 998 1001
187 67 997 995 998 999
188 67 997 995 998 1000
189 67 997 995 998 1001
190 62 989 992 995 996
191 62 989 992 995 997
192 64 989 992 995 998
193 61 993 992 995 996
194 61 993 992 995 997
195 65 993 992 995 998
196 61 994 992 995 996
197 61 994 992 995 997
198 65 994 992 995 998
199 53 932 940 941 942
200 53 932 940 941 943
201 54 932 940 941 944
202 55 940 941 944 945
203 55 940 941 944 946
204 56 940 941 944 947
205 57 942 941 944 945
206 57 942 941 944 946
207 58 942 941 944 947
208 57 943 941 944 945
209 57 943 941 944 946
210 58 943 941 944 947
211 59 941 944 947 948
212 59 941 944 947 949
213 60 941 944 947 950
214 61 945 944 947 948
215 61 945 944 947 949
216 62 945 944 947 950
217 61 946 944 947 948
218 61 946 944 947 949
219 62 946 944 947 950
220 62 944 947 950 951
221 62 944 947 950 952
222 63 944 947 950 953
223 61 948 947 950 951
224 61 948 947 950 952
225 62 948 947 950 953
226 61 949 947 950 951
227 61 949 947 950 952
228 62 949 947 950 953
229 62 947 950 953 954
230 62 947 950 953 955
231 63 947 950 953 956
232 61 951 950 953 954
233 61 951 950 953 955
234 62 951 950 953 956
235 61 952 950 953 954
236 61 952 950 953 955
237 62 952 950 953 956
238 62 950 953 956 957
239 62 950 953 956 958
240 63 950 953 956 959
241 61 954 953 956 957
242 61 954 953 956 958
243 62 954 953 956 959
244 61 955 953 956 957
245 61 955 953 956 958
246 62 955 953 956 959
247 62 980 983 986 987
248 62 980 983 986 988
249 63 980 983 986 989
250 61 984 983 986 987
251 61 984 983 986 988
252 62 984 983 986 989
253 61 985 983 986 987
254 61 985 983 986 988
255 62 985 983 986 989
256 53 968 976 977 978
257 53 968 976 977 979
258 54 968 976 977 980
259 46 967 968 969 970
260 48 967 968 969 973
261 47 976 968 969 970
262 49 976 968 969 973
263 50 967 968 976 977
264 50 969 968 976 977
265 42 968 969 970 971
266 51 968 969 970 974
267 43 973 969 970 971
268 52 973 969 970 974
269 46 966 967 968 969
270 47 966 967 968 976
271 48 972 967 968 969
272 49 972 967 968 976
273 45 878 879 880 875
274 43 878 879 880 884
275 43 883 879 880 875
276 52 883 879 880 884
277 42 877 878 879 880
278 51 877 878 879 883
279 43 882 878 879 880
280 52 882 878 879 883
281 46 930 931 932 933
282 47 930 931 932 940
283 48 936 931 932 933
284 49 936 931 932 940
285 46 931 932 933 934
286 48 931 932 933 937
287 47 940 932 933 934
288 49 940 932 933 937
289 50 931 932 940 941
290 50 933 932 940 941
291 46 876 877 878 879
292 48 876 877 878 882
293 47 885 877 878 879
294 49 885 877 878 882
295 50 876 877 885 886
296 50 878 877 885 886
297 46 875 876 877 878
298 47 875 876 877 885
299 48 881 876 877 878
300 49 881 876 877 885
301 40 924 966 967 968
302 41 924 966 967 972
303 42 971 966 967 968
304 43 971 966 967 972
305 44 924 966 971 970
306 41 924 966 971 975
307 45 967 966 971 970
308 43 967 966 971 975
309 17 927 923 924 919
310 18 927 923 924 966
311 20 924 923 927 922
312 19 924 923 927 925
313 25 919 924 966 967
314 25 919 924 966 971
315 24 923 924 966 967
316 24 923 924 966 971
317 21 918 919 924 923
318 22 918 919 924 966
319 22 930 919 924 923
320 23 930 919 924 966
321 24 918 919 930 931
322 24 918 919 930 935
323 25 924 919 930 931
324 25 924 919 930 935
325 40 919 930 931 932
326 41 919 930 931 936
327 42 935 930 931 932
328 43 935 930 931 936
329 44 919 930 935 934
330 41 919 930 935 939
331 45 931 930 935 934
332 43 931 930 935 939
333 17 922 918 919 924
334 18 922 918 919 930
335 19 919 918 922 920
336 20 919 918 922 927
337 45 969 970 971 966
338 43 969 970 971 975
339 43 974 970 971 966
340 52 974 970 971 975
341 62 889 892 895 896
342 62 889 892 895 897
343 63 889 892 895 898
344 61 893 892 895 896
345 61 893 892 895 897
346 62 893 892 895 898
347 61 894 892 895 896
348 61 894 892 895 897
349 62 894 892 895 898
350 62 892 895 898 899
351 62 892 895 898 900
352 63 892 895 898 901
353 61 896 895 898 899
354 61 896 895 898 900
355 62 896 895 898 901
356 61 897 895 898 899
357 61 897 895 898 900
358 62 897 895 898 901
359 62 895 898 901 902
360 62 895 898 901 903
361 63 895 898 901 904
362 61 899 898 901 902
363 61 899 898 901 903
364 62 899 898 901 904
365 61 900 898 901 902
366 61 900 898 901 903
367 62 900 898 901 904
368 3 1006 1002 1003 925
369 1 1006 1002 1003 1004
370 1 1003 1002 1006 1005
371 3 1003 1002 1006 1011
372 59 886 889 892 893
373 59 886 889 892 894
374 60 886 889 892 895
375 61 890 889 892 893
376 61 890 889 892 894
377 62 890 889 892 895
378 61 891 889 892 893
379 61 891 889 892 894
380 62 891 889 892 895
381 55 885 886 889 890
382 55 885 886 889 891
383 56 885 886 889 892
384 57 887 886 889 890
385 57 887 886 889 891
386 58 887 886 889 892
387 57 888 886 889 890
388 57 888 886 889 891
389 58 888 886 889 892
390 53 877 885 886 887
391 53 877 885 886 888
392 54 877 885 886 889
393 26 915 920 921 926
394 27 915 920 921 928
395 28 922 920 921 926
396 29 922 920 921 928
397 30 915 920 922 918
398 31 915 920 922 927
399 32 921 920 922 918
400 33 921 920 922 927
401 37 918 922 927 923
402 38 918 922 927 925
403 38 920 922 927 923
404 39 920 922 927 925
405 8 1003 1004 1005 1006
406 9 1003 1004 1005 1008
407 9 1007 1004 1005 1006
408 10 1007 1004 1005 1008
409 28 927 925 926 921
410 29 927 925 926 929
411 26 1003 925 926 921
412 27 1003 925 926 929
413 33 926 925 927 922
414 32 926 925 927 923
415 31 1003 925 927 922
416 30 1003 925 927 923
417 13 926 925 1003 1002
418 15 926 925 1003 1004
419 14 927 925 1003 1002
420 16 927 925 1003 1004
421 11 925 1003 1004 1005
422 12 925 1003 1004 1007
423 4 1002 1003 1004 1005
424 5 1002 1003 1004 1007
425 34 920 921 926 925
426 35 920 921 926 929
427 35 928 921 926 925
428 36 928 921 926 929
429 62 898 901 904 905
430 62 898 901 904 906
431 64 898 901 904 907
432 61 902 901 904 905
433 61 902 901 904 906
434 65 902 901 904 907
435 61 903 901 904 905
436 61 903 901 904 906
437 65 903 901 904 907
438 66 901 904 907 908
439 66 901 904 907 909
440 66 901 904 907 910
441 67 905 904 907 908
442 67 905 904 907 909
443 67 905 904 907 910
444 67 906 904 907 908
445 67 906 904 907 909
446 67 906 904 907 910
447 59 1032 1035 1038 1039
448 59 1032 1035 1038 1040
449 60 1032 1035 1038 1041
450 61 1036 1035 1038 1039
451 61 1036 1035 1038 1040
452 62 1036 1035 1038 1041
453 61 1037 1035 1038 1039
454 61 1037 1035 1038 1040
455 62 1037 1035 1038 1041
456 62 1035 1038 1041 1042
457 62 1035 1038 1041 1043
458 63 1035 1038 1041 1044
459 61 1039 1038 1041 1042
460 61 1039 1038 1041 1043
461 62 1039 1038 1041 1044
462 61 1040 1038 1041 1042
463 61 1040 1038 1041 1043
464 62 1040 1038 1041 1044
465 55 1031 1032 1035 1036
466 55 1031 1032 1035 1037
467 56 1031 1032 1035 1038
468 57 1033 1032 1035 1036
469 57 1033 1032 1035 1037
470 58 1033 1032 1035 1038
471 57 1034 1032 1035 1036
472 57 1034 1032 1035 1037
473 58 1034 1032 1035 1038
474 40 1010 1021 1022 1023
475 41 1010 1021 1022 1027
476 42 1026 1021 1022 1023
477 43 1026 1021 1022 1027
478 44 1010 1021 1026 1025
479 41 1010 1021 1026 1030
480 45 1022 1021 1026 1025
481 43 1022 1021 1026 1030
482 46 1021 1022 1023 1024
483 47 1021 1022 1023 1031
484 48 1027 1022 1023 1024
485 49 1027 1022 1023 1031
486 46 1022 1023 1024 1025
487 48 1022 1023 1024 1028
488 47 1031 1023 1024 1025
489 49 1031 1023 1024 1028
490 50 1022 1023 1031 1032
491 50 1024 1023 1031 1032
492 53 1023 1031 1032 1033
493 53 1023 1031 1032 1034
494 54 1023 1031 1032 1035
495 42 1023 1024 1025 1026
496 51 1023 1024 1025 1029
497 43 1028 1024 1025 1026
498 52 1028 1024 1025 1029
499 45 1024 1025 1026 1021
500 43 1024 1025 1026 1030
501 43 1029 1025 1026 1021
502 52 1029 1025 1026 1030
503 55 30 31 34 35
504 55 30 31 34 36
505 56 30 31 34 37
506 57 32 31 34 35
507 57 32 31 34 36
508 58 32 31 34 37
509 57 33 31 34 35
510 57 33 31 34 36
511 58 33 31 34 37
512 66 865 868 871 872
513 66 865 868 871 873
514 66 865 868 871 874
515 67 869 868 871 872
516 67 869 868 871 873
517 67 869 868 871 874
518 67 870 868 871 872
519 67 870 868 871 873
520 67 870 868 871 874
521 59 850 853 856 857
522 59 850 853 856 858
523 60 850 853 856 859
524 61 854 853 856 857
525 61 854 853 856 858
526 62 854 853 856 859
527 61 855 853 856 857
528 61 855 853 856 858
529 62 855 853 856 859
530 62 853 856 859 860
531 62 853 856 859 861
532 63 853 856 859 862
533 61 857 856 859 860
534 61 857 856 859 861
535 62 857 856 859 862
536 61 858 856 859 860
537 61 858 856 859 861
538 62 858 856 859 862
539 53 841 849 850 851
540 53 841 849 850 852
541 54 841 849 850 853
542 55 849 850 853 854
543 55 849 850 853 855
544 56 849 850 853 856
545 57 851 850 853 854
546 57 851 850 853 855
547 58 851 850 853 856
548 57 852 850 853 854
549 57 852 850 853 855
550 58 852 850 853 856
551 66 956 959 962 963
552 66 956 959 962 964
553 66 956 959 962 965
554 67 960 959 962 963
555 67 960 959 962 964
556 67 960 959 962 965
557 67 961 959 962 963
558 67 961 959 962 964
559 67 961 959 962 965
560 62 953 956 959 960
561 62 953 956 959 961
562 64 953 956 959 962
563 61 957 956 959 960
564 61 957 956 959 961
565 65 957 956 959 962
566 61 958 956 959 960
567 61 958 956 959 961
568 65 958 956 959 962
569 45 787 788 789 784
570 43 787 788 789 793
571 43 792 788 789 784
572 52 792 788 789 793
573 42 786 787 788 789
574 51 786 787 788 792
575 43 791 787 788 789
576 52 791 787 788 792
577 45 842 843 844 839
578 43 842 843 844 848
579 43 847 843 844 839
580 52 847 843 844 848
581 42 841 842 843 844
582 51 841 842 843 847
583 43 846 842 843 844
584 52 846 842 843 847
585 46 840 841 842 843
586 48 840 841 842 846
587 47 849 841 842 843
588 49 849 841 842 846
589 50 840 841 849 850
590 50 842 841 849 850
591 21 827 828 833 832
592 22 827 828 833 875
593 22 839 828 833 832
594 23 839 828 833 875
595 24 827 828 839 840
596 24 827 828 839 844
597 25 833 828 839 840
598 25 833 828 839 844
599 40 828 839 840 841
600 41 828 839 840 845
601 42 844 839 840 841
602 43 844 839 840 845
603 44 828 839 844 843
604 41 828 839 844 848
605 45 840 839 844 843
606 43 840 839 844 848
607 46 839 840 841 842
608 47 839 840 841 849
609 48 845 840 841 842
610 49 845 840 841 849
611 55 794 795 798 799
612 55 794 795 798 800
613 56 794 795 798 801
614 57 796 795 798 799
615 57 796 795 798 800
616 58 796 795 798 801
617 57 797 795 798 799
618 57 797 795 798 800
619 58 797 795 798 801
620 46 785 786 787 788
621 48 785 786 787 791
622 47 794 786 787 788
623 49 794 786 787 791
624 50 785 786 794 795
625 50 787 786 794 795
626 53 786 794 795 796
627 53 786 794 795 797
628 54 786 794 795 798
629 59 795 798 801 802
630 59 795 798 801 803
631 60 795 798 801 804
632 61 799 798 801 802
633 61 799 798 801 803
634 62 799 798 801 804
635 61 800 798 801 802
636 61 800 798 801 803
637 62 800 798 801 804
638 17 831 827 828 833
639 18 831 827 828 839
640 19 828 827 831 829
641 20 828 827 831 836
642 40 833 875 876 877
643 41 833 875 876 881
644 42 880 875 876 877
645 43 880 875 876 881
646 44 833 875 880 879
647 41 833 875 880 884
648 45 876 875 880 879
649 43 876 875 880 884
650 45 933 934 935 930
651 43 933 934 935 939
652 43 938 934 935 930
653 52 938 934 935 939
654 42 932 933 934 935
655 51 932 933 934 938
656 43 937 933 934 935
657 52 937 933 934 938
658 25 828 833 875 876
659 25 828 833 875 880
660 24 832 833 875 876
661 24 832 833 875 880
662 17 836 832 833 828
663 18 836 832 833 875
664 20 833 832 836 831
665 19 833 832 836 834
666 37 827 831 836 832
667 38 827 831 836 834
668 38 829 831 836 832
669 39 829 831 836 834
670 26 824 829 830 835
671 27 824 829 830 837
672 28 831 829 830 835
673 29 831 829 830 837
674 30 824 829 831 827
675 31 824 829 831 836
676 32 830 829 831 827
677 33 830 829 831 836
678 34 829 830 835 834
679 35 829 830 835 838
680 35 837 830 835 834
681 36 837 830 835 838
682 62 798 801 804 805
683 62 798 801 804 806
684 63 798 801 804 807
685 61 802 801 804 805
686 61 802 801 804 806
687 62 802 801 804 807
688 61 803 801 804 805
689 61 803 801 804 806
690 62 803 801 804 807
691 62 804 807 810 811
692 62 804 807 810 812
693 63 804 807 810 813
694 61 808 807 810 811
695 61 808 807 810 812
696 62 808 807 810 813
697 61 809 807 810 811
698 61 809 807 810 812
699 62 809 807 810 813
700 62 801 804 807 808
701 62 801 804 807 809
702 63 801 804 807 810
703 61 805 804 807 808
704 61 805 804 807 809
705 62 805 804 807 810
706 61 806 804 807 808
707 61 806 804 807 809
708 62 806 804 807 810
709 3 915 911 912 834
710 1 915 911 912 913
711 1 912 911 915 914
712 3 912 911 915 920
713 13 911 915 920 921
714 14 911 915 920 922
715 15 914 915 920 921
716 16 914 915 920 922
717 4 913 914 915 911
718 11 913 914 915 920
719 5 917 914 915 911
720 12 917 914 915 920
721 11 834 912 913 914
722 12 834 912 913 916
723 4 911 912 913 914
724 5 911 912 913 916
725 28 836 834 835 830
726 29 836 834 835 838
727 26 912 834 835 830
728 27 912 834 835 838
729 33 835 834 836 831
730 32 835 834 836 832
731 31 912 834 836 831
732 30 912 834 836 832
733 13 835 834 912 911
734 15 835 834 912 913
735 14 836 834 912 911
736 16 836 834 912 913
737 8 912 913 914 915
738 9 912 913 914 917
739 9 916 913 914 915
740 10 916 913 914 917
741 62 1038 1041 1044 1045
742 62 1038 1041 1044 1046
743 63 1038 1041 1044 1047
744 61 1042 1041 1044 1045
745 61 1042 1041 1044 1046
746 62 1042 1041 1044 1047
747 61 1043 1041 1044 1045
748 61 1043 1041 1044 1046
749 62 1043 1041 1044 1047
750 62 1041 1044 1047 1048
751 62 1041 1044 1047 1049
752 63 1041 1044 1047 1050
753 61 1045 1044 1047 1048
754 61 1045 1044 1047 1049
755 62 1045 1044 1047 1050
756 61 1046 1044 1047 1048
757 61 1046 1044 1047 1049
758 62 1046 1044 1047 1050
759 62 1044 1047 1050 1051
760 62 1044 1047 1050 1052
761 64 1044 1047 1050 1053
762 61 1048 1047 1050 1051
763 61 1048 1047 1050 1052
764 65 1048 1047 1050 1053
765 61 1049 1047 1050 1051
766 61 1049 1047 1050 1052
767 65 1049 1047 1050 1053
768 66 1047 1050 1053 1054
769 66 1047 1050 1053 1055
770 66 1047 1050 1053 1056
771 67 1051 1050 1053 1054
772 67 1051 1050 1053 1055
773 67 1051 1050 1053 1056
774 67 1052 1050 1053 1054
775 67 1052 1050 1053 1055
776 67 1052 1050 1053 1056
777 62 762 765 768 769
778 62 762 765 768 770
779 63 762 765 768 771
780 61 766 765 768 769
781 61 766 765 768 770
782 62 766 765 768 771
783 61 767 765 768 769
784 61 767 765 768 770
785 62 767 765 768 771
786 62 765 768 771 772
787 62 765 768 771 773
788 63 765 768 771 774
789 61 769 768 771 772
790 61 769 768 771 773
791 62 769 768 771 774
792 61 770 768 771 772
793 61 770 768 771 773
794 62 770 768 771 774
795 62 771 774 777 778
796 62 771 774 777 779
797 64 771 774 777 780
798 61 775 774 777 778
799 61 775 774 777 779
800 65 775 774 777 780
801 61 776 774 777 778
802 61 776 774 777 779
803 65 776 774 777 780
804 66 774 777 780 781
805 66 774 777 780 782
806 66 774 777 780 783
807 67 778 777 780 781
808 67 778 777 780 782
809 67 778 777 780 783
810 67 779 777 780 781
811 67 779 777 780 782
812 67 779 777 780 783
813 62 768 771 774 775
814 62 768 771 774 776
815 63 768 771 774 777
816 61 772 771 774 775
817 61 772 771 774 776
818 62 772 771 774 777
819 61 773 771 774 775
820 61 773 771 774 776
821 62 773 771 774 777
822 55 758 759 762 763
823 55 758 759 762 764
824 56 758 759 762 765
825 57 760 759 762 763
826 57 760 759 762 764
827 58 760 759 762 765
828 57 761 759 762 763
829 57 761 759 762 764
830 58 761 759 762 765
831 59 759 762 765 766
832 59 759 762 765 767
833 60 759 762 765 768
834 61 763 762 765 766
835 61 763 762 765 767
836 62 763 762 765 768
837 61 764 762 765 766
838 61 764 762 765 767
839 62 764 762 765 768
840 53 750 758 759 760
841 53 750 758 759 761
842 54 750 758 759 762
843 42 750 751 752 753
844 51 750 751 752 756
845 43 755 751 752 753
846 52 755 751 752 756
847 45 751 752 753 748
848 43 751 752 753 757
849 43 756 752 753 748
850 52 756 752 753 757
851 8 730 731 732 733
852 9 730 731 732 735
853 9 734 731 732 733
854 10 734 731 732 735
855 46 749 750 751 752
856 48 749 750 751 755
857 47 758 750 751 752
858 49 758 750 751 755
859 50 749 750 758 759
860 50 751 750 758 759
861 46 748 749 750 751
862 47 748 749 750 758
863 48 754 749 750 751
864 49 754 749 750 758
865 40 737 748 749 750
866 41 737 748 749 754
867 42 753 748 749 750
868 43 753 748 749 754
869 44 737 748 753 752
870 41 737 748 753 757
871 45 749 748 753 752
872 43 749 748 753 757
873 62 856 859 862 863
874 62 856 859 862 864
875 63 856 859 862 865
876 61 860 859 862 863
877 61 860 859 862 864
878 62 860 859 862 865
879 61 861 859 862 863
880 61 861 859 862 864
881 62 861 859 862 865
882 25 737 742 784 785
883 25 737 742 784 789
884 24 741 742 784 785
885 24 741 742 784 789
886 21 736 737 742 741
887 22 736 737 742 784
888 22 748 737 742 741
889 23 748 737 742 784
890 24 736 737 748 749
891 24 736 737 748 753
892 25 742 737 748 749
893 25 742 737 748 753
894 4 731 732 733 729
895 11 731 732 733 738
896 5 735 732 733 729
897 12 735 732 733 738
898 13 729 733 738 739
899 14 729 733 738 740
900 15 732 733 738 739
901 16 732 733 738 740
902 17 740 736 737 742
903 18 740 736 737 748
904 19 737 736 740 738
905 20 737 736 740 745
906 37 736 740 745 741
907 38 736 740 745 743
908 38 738 740 745 741
909 39 738 740 745 743
910 26 733 738 739 744
911 27 733 738 739 746
912 28 740 738 739 744
913 29 740 738 739 746
914 30 733 738 740 736
915 31 733 738 740 745
916 32 739 738 740 736
917 33 739 738 740 745
918 62 859 862 865 866
919 62 859 862 865 867
920 63 859 862 865 868
921 61 863 862 865 866
922 61 863 862 865 867
923 62 863 862 865 868
924 61 864 862 865 866
925 61 864 862 865 867
926 62 864 862 865 868
927 62 862 865 868 869
928 62 862 865 868 870
929 64 862 865 868 871
930 61 866 865 868 869
931 61 866 865 868 870
932 65 866 865 868 871
933 61 867 865 868 869
934 61 867 865 868 870
935 65 867 865 868 871
936 34 738 739 744 743
937 35 738 739 744 747
938 35 746 739 744 743
939 36 746 739 744 747
940 3 733 729 730 652
941 1 733 729 730 731
942 1 730 729 733 732
943 3 730 729 733 738
944 66 810 813 816 817
945 66 810 813 816 818
946 66 810 813 816 819
947 67 814 813 816 817
948 67 814 813 816 818
949 67 814 813 816 819
950 67 815 813 816 817
951 67 815 813 816 818
952 67 815 813 816 819
953 46 784 785 786 787
954 47 784 785 786 794
955 48 790 785 786 787
956 49 790 785 786 794
957 40 742 784 785 786
958 41 742 784 785 790
959 42 789 784 785 786
960 43 789 784 785 790
961 44 742 784 789 788
962 41 742 784 789 793
963 45 785 784 789 788
964 43 785 784 789 793
965 17 745 741 742 737
966 18 745 741 742 784
967 20 742 741 745 740
968 19 742 741 745 743
969 66 719 722 725 726
970 66 719 722 725 727
971 66 719 722 725 728
972 67 723 722 725 726
973 67 723 722 725 727
974 67 723 722 725 728
975 67 724 722 725 726
976 67 724 722 725 727
977 67 724 722 725 728
978 62 716 719 722 723
979 62 716 719 722 724
980 64 716 719 722 725
981 61 720 719 722 723
982 61 720 719 722 724
983 65 720 719 722 725
984 61 721 719 722 723
985 61 721 719 722 724
986 65 721 719 722 725
987 62 713 716 719 720
988 62 713 716 719 721
989 63 713 716 719 722
990 61 717 716 719 720
991 61 717 716 719 721
992 62 717 716 719 722
993 61 718 716 719 720
994 61 718 716 719 721
995 62 718 716 719 722
996 28 745 743 744 739
997 29 745 743 744 747
998 26 821 743 744 739
999 27 821 743 744 747
1000 33 744 743 745 740
1001 32 744 743 745 741
1002 31 821 743 745 740
1003 30 821 743 745 741
1004 13 744 743 821 820
1005 15 744 743 821 822
1006 14 745 743 821 820
1007 16 745 743 821 822
1008 3 824 820 821 743
1009 1 824 820 821 822
1010 1 821 820 824 823
1011 3 821 820 824 829
1012 13 820 824 829 830
1013 14 820 824 829 831
1014 15 823 824 829 830
1015 16 823 824 829 831
1016 4 822 823 824 820
1017 11 822 823 824 829
1018 5 826 823 824 820
1019 12 826 823 824 829
1020 11 743 821 822 823
1021 12 743 821 822 825
1022 4 820 821 822 823
1023 5 820 821 822 825
1024 8 821 822 823 824
1025 9 821 822 823 826
1026 9 825 822 823 824
1027 10 825 822 823 826
1028 62 807 810 813 814
1029 62 807 810 813 815
1030 64 807 810 813 816
1031 61 811 810 813 814
1032 61 811 810 813 815
1033 65 811 810 813 816
1034 61 812 810 813 814
1035 61 812 810 813 815
1036 65 812 810 813 816
1037 62 625 628 631 632
1038 62 625 628 631 633
1039 64 625 628 631 634
1040 61 629 628 631 632
1041 61 629 628 631 633
1042 65 629 628 631 634
1043 61 630 628 631 632
1044 61 630 628 631 633
1045 65 630 628 631 634
1046 62 619 622 625 626
1047 62 619 622 625 627
1048 63 619 622 625 628
1049 61 623 622 625 626
1050 61 623 622 625 627
1051 62 623 622 625 628
1052 61 624 622 625 626
1053 61 624 622 625 627
1054 62 624 622 625 628
1055 62 616 619 622 623
1056 62 616 619 622 624
1057 63 616 619 622 625
1058 61 620 619 622 623
1059 61 620 619 622 624
1060 62 620 619 622 625
1061 61 621 619 622 623
1062 61 621 619 622 624
1063 62 621 619 622 625
1064 62 622 625 628 629
1065 62 622 625 628 630
1066 63 622 625 628 631
1067 61 626 625 628 629
1068 61 626 625 628 630
1069 62 626 625 628 631
1070 61 627 625 628 629
1071 61 627 625 628 630
1072 62 627 625 628 631
1073 59 613 616 619 620
1074 59 613 616 619 621
1075 60 613 616 619 622
1076 61 617 616 619 620
1077 61 617 616 619 621
1078 62 617 616 619 622
1079 61 618 616 619 620
1080 61 618 616 619 621
1081 62 618 616 619 622
1082 55 612 613 616 617
1083 55 612 613 616 618
1084 56 612 613 616 619
1085 57 614 613 616 617
1086 57 614 613 616 618
1087 58 614 613 616 619
1088 57 615 613 616 617
1089 57 615 613 616 618
1090 58 615 613 616 619
1091 53 604 612 613 614
1092 53 604 612 613 615
1093 54 604 612 613 616
1094 42 604 605 606 607
1095 51 604 605 606 610
1096 43 609 605 606 607
1097 52 609 605 606 610
1098 46 603 604 605 606
1099 48 603 604 605 609
1100 47 612 604 605 606
1101 49 612 604 605 609
1102 50 603 604 612 613
1103 50 605 604 612 613
1104 45 605 606 607 602
1105 43 605 606 607 611
1106 43 610 606 607 602
1107 52 610 606 607 611
1108 46 602 603 604 605
1109 47 602 603 604 612
1110 48 608 603 604 605
1111 49 608 603 604 612
1112 66 537 540 543 544
1113 66 537 540 543 545
1114 66 537 540 543 546
1115 67 541 540 543 544
1116 67 541 540 543 545
1117 67 541 540 543 546
1118 67 542 540 543 544
1119 67 542 540 543 545
1120 67 542 540 543 546
1121 62 534 537 540 541
1122 62 534 537 540 542
1123 64 534 537 540 543
1124 61 538 537 540 541
1125 61 538 537 540 542
1126 65 538 537 540 543
1127 61 539 537 540 541
1128 61 539 537 540 542
1129 65 539 537 540 543
1130 62 531 534 537 538
1131 62 531 534 537 539
1132 63 531 534 537 540
1133 61 535 534 537 538
1134 61 535 534 537 539
1135 62 535 534 537 540
1136 61 536 534 537 538
1137 61 536 534 537 539
1138 62 536 534 537 540
1139 37 645 649 654 650
1140 38 645 649 654 652
1141 38 647 649 654 650
1142 39 647 649 654 652
1143 17 649 645 646 651
1144 18 649 645 646 657
1145 19 646 645 649 647
1146 20 646 645 649 654
1147 13 638 642 647 648
1148 14 638 642 647 649
1149 15 641 642 647 648
1150 16 641 642 647 649
1151 26 642 647 648 653
1152 27 642 647 648 655
1153 28 649 647 648 653
1154 29 649 647 648 655
1155 30 642 647 649 645
1156 31 642 647 649 654
1157 32 648 647 649 645
1158 33 648 647 649 654
1159 34 647 648 653 652
1160 35 647 648 653 656
1161 35 655 648 653 652
1162 36 655 648 653 656
1163 4 640 641 642 638
1164 11 640 641 642 647
1165 5 644 641 642 638
1166 12 644 641 642 647
1167 8 639 640 641 642
1168 9 639 640 641 644
1169 9 643 640 641 642
1170 10 643 640 641 644
1171 11 652 730 731 732
1172 12 652 730 731 734
1173 4 729 730 731 732
1174 5 729 730 731 734
1175 28 654 652 653 648
1176 29 654 652 653 656
1177 26 730 652 653 648
1178 27 730 652 653 656
1179 33 653 652 654 649
1180 32 653 652 654 650
1181 31 730 652 654 649
1182 30 730 652 654 650
1183 13 653 652 730 729
1184 15 653 652 730 731
1185 14 654 652 730 729
1186 16 654 652 730 731
1187 17 654 650 651 646
1188 18 654 650 651 693
1189 20 651 650 654 649
1190 19 651 650 654 652
1191 21 645 646 651 650
1192 22 645 646 651 693
1193 22 657 646 651 650
1194 23 657 646 651 693
1195 24 645 646 657 658
1196 24 645 646 657 662
1197 25 651 646 657 658
1198 25 651 646 657 662
1199 40 651 693 694 695
1200 41 651 693 694 699
1201 42 698 693 694 695
1202 43 698 693 694 699
1203 44 651 693 698 697
1204 41 651 693 698 702
1205 45 694 693 698 697
1206 43 694 693 698 702
1207 25 646 651 693 694
1208 25 646 651 693 698
1209 24 650 651 693 694
1210 24 650 651 693 698
1211 46 694 695 696 697
1212 48 694 695 696 700
1213 47 703 695 696 697
1214 49 703 695 696 700
1215 50 694 695 703 704
1216 50 696 695 703 704
1217 53 695 703 704 705
1218 53 695 703 704 706
1219 54 695 703 704 707
1220 55 703 704 707 708
1221 55 703 704 707 709
1222 56 703 704 707 710
1223 57 705 704 707 708
1224 57 705 704 707 709
1225 58 705 704 707 710
1226 57 706 704 707 708
1227 57 706 704 707 709
1228 58 706 704 707 710
1229 46 693 694 695 696
1230 47 693 694 695 703
1231 48 699 694 695 696
1232 49 699 694 695 703
1233 45 696 697 698 693
1234 43 696 697 698 702
1235 43 701 697 698 693
1236 52 701 697 698 702
1237 42 695 696 697 698
1238 51 695 696 697 701
1239 43 700 696 697 698
1240 52 700 696 697 701
1241 40 646 657 658 659
1242 41 646 657 658 663
1243 42 662 657 658 659
1244 43 662 657 658 663
1245 44 646 657 662 661
1246 41 646 657 662 666
1247 45 658 657 662 661
1248 43 658 657 662 666
1249 59 704 707 710 711
1250 59 704 707 710 712
1251 60 704 707 710 713
1252 61 708 707 710 711
1253 61 708 707 710 712
1254 62 708 707 710 713
1255 61 709 707 710 711
1256 61 709 707 710 712
1257 62 709 707 710 713
1258 62 707 710 713 714
1259 62 707 710 713 715
1260 63 707 710 713 716
1261 61 711 710 713 714
1262 61 711 710 713 715
1263 62 711 710 713 716
1264 61 712 710 713 714
1265 61 712 710 713 715
1266 62 712 710 713 716
1267 62 710 713 716 717
1268 62 710 713 716 718
1269 63 710 713 716 719
1270 61 714 713 716 717
1271 61 714 713 716 718
1272 62 714 713 716 719
1273 61 715 713 716 717
1274 61 715 713 716 718
1275 62 715 713 716 719
1276 66 592 595 598 599
1277 66 592 595 598 600
1278 66 592 595 598 601
1279 67 596 595 598 599
1280 67 596 595 598 600
1281 67 596 595 598 601
1282 67 597 595 598 599
1283 67 597 595 598 600
1284 67 597 595 598 601
1285 59 577 580 583 584
1286 59 577 580 583 585
1287 60 577 580 583 586
1288 61 581 580 583 584
1289 61 581 580 583 585
1290 62 581 580 583 586
1291 61 582 580 583 584
1292 61 582 580 583 585
1293 62 582 580 583 586
1294 62 586 589 592 593
1295 62 586 589 592 594
1296 63 586 589 592 595
1297 61 590 589 592 593
1298 61 590 589 592 594
1299 62 590 589 592 595
1300 61 591 589 592 593
1301 61 591 589 592 594
1302 62 591 589 592 595
1303 62 589 592 595 596
1304 62 589 592 595 597
1305 64 589 592 595 598
1306 61 593 592 595 596
1307 61 593 592 595 597
1308 65 593 592 595 598
1309 61 594 592 595 596
1310 61 594 592 595 597
1311 65 594 592 595 598
1312 62 580 583 586 587
1313 62 580 583 586 588
1314 63 580 583 586 589
1315 61 584 583 586 587
1316 61 584 583 586 588
1317 62 584 583 586 589
1318 61 585 583 586 587
1319 61 585 583 586 588
1320 62 585 583 586 589
1321 62 583 586 589 590
1322 62 583 586 589 591
1323 63 583 586 589 592
1324 61 587 586 589 590
1325 61 587 586 589 591
1326 62 587 586 589 592
1327 61 588 586 589 590
1328 61 588 586 589 591
1329 62 588 586 589 592
1330 55 576 577 580 581
1331 55 576 577 580 582
1332 56 576 577 580 583
1333 57 578 577 580 581
1334 57 578 577 580 582
1335 58 578 577 580 583
1336 57 579 577 580 581
1337 57 579 577 580 582
1338 58 579 577 580 583
1339 66 628 631 634 635
1340 66 628 631 634 636
1341 66 628 631 634 637
1342 67 632 631 634 635
1343 67 632 631 634 636
1344 67 632 631 634 637
1345 67 633 631 634 635
1346 67 633 631 634 636
1347 67 633 631 634 637
1348 42 568 569 570 571
1349 51 568 569 570 574
1350 43 573 569 570 571
1351 52 573 569 570 574
1352 45 514 515 516 511
1353 43 514 515 516 520
1354 43 519 515 516 511
1355 52 519 515 516 520
1356 42 513 514 515 516
1357 51 513 514 515 519
1358 43 518 514 515 516
1359 52 518 514 515 519
1360 46 512 513 514 515
1361 48 512 513 514 518
1362 47 521 513 514 515
1363 49 521 513 514 518
1364 50 512 513 521 522
1365 50 514 513 521 522
1366 40 560 602 603 604
1367 41 560 602 603 608
1368 42 607 602 603 604
1369 43 607 602 603 608
1370 44 560 602 607 606
1371 41 560 602 607 611
1372 45 603 602 607 606
1373 43 603 602 607 611
1374 40 555 566 567 568
1375 41 555 566 567 572
1376 42 571 566 567 568
1377 43 571 566 567 572
1378 44 555 566 571 570
1379 41 555 566 571 575
1380 45 567 566 571 570
1381 43 567 566 571 575
1382 25 555 560 602 603
1383 25 555 560 602 607
1384 24 559 560 602 603
1385 24 559 560 602 607
1386 21 554 555 560 559
1387 22 554 555 560 602
1388 22 566 555 560 559
1389 23 566 555 560 602
1390 24 554 555 566 567
1391 24 554 555 566 571
1392 25 560 555 566 567
1393 25 560 555 566 571
1394 17 563 559 560 555
1395 18 563 559 560 602
1396 20 560 559 563 558
1397 19 560 559 563 561
1398 37 554 558 563 559
1399 38 554 558 563 561
1400 38 556 558 563 559
1401 39 556 558 563 561
1402 17 558 554 555 560
1403 18 558 554 555 566
1404 19 555 554 558 556
1405 20 555 554 558 563
1406 53 568 576 577 578
1407 53 568 576 577 579
1408 54 568 576 577 580
1409 46 567 568 569 570
1410 48 567 568 569 573
1411 47 576 568 569 570
1412 49 576 568 569 573
1413 50 567 568 576 577
1414 50 569 568 576 577
1415 46 566 567 568 569
1416 47 566 567 568 576
1417 48 572 567 568 569
1418 49 572 567 568 576
1419 45 569 570 571 566
1420 43 569 570 571 575
1421 43 574 570 571 566
1422 52 574 570 571 575
1423 62 528 531 534 535
1424 62 528 531 534 536
1425 63 528 531 534 537
1426 61 532 531 534 535
1427 61 532 531 534 536
1428 62 532 531 534 537
1429 61 533 531 534 535
1430 61 533 531 534 536
1431 62 533 531 534 537
1432 59 522 525 528 529
1433 59 522 525 528 530
1434 60 522 525 528 531
1435 61 526 525 528 529
1436 61 526 525 528 530
1437 62 526 525 528 531
1438 61 527 525 528 529
1439 61 527 525 528 530
1440 62 527 525 528 531
1441 53 513 521 522 523
1442 53 513 521 522 524
1443 54 513 521 522 525
1444 55 521 522 525 526
1445 55 521 522 525 527
1446 56 521 522 525 528
1447 57 523 522 525 526
1448 57 523 522 525 527
1449 58 523 522 525 528
1450 57 524 522 525 526
1451 57 524 522 525 527
1452 58 524 522 525 528
1453 62 525 528 531 532
1454 62 525 528 531 533
1455 63 525 528 531 534
1456 61 529 528 531 532
1457 61 529 528 531 533
1458 62 529 528 531 534
1459 61 530 528 531 532
1460 61 530 528 531 533
1461 62 530 528 531 534
1462 26 551 556 557 562
1463 27 551 556 557 564
1464 28 558 556 557 562
1465 29 558 556 557 564
1466 30 551 556 558 554
1467 31 551 556 558 563
1468 32 557 556 558 554
1469 33 557 556 558 563
1470 3 642 638 639 561
1471 1 642 638 639 640
1472 1 639 638 642 641
1473 3 639 638 642 647
1474 11 561 639 640 641
1475 12 561 639 640 643
1476 4 638 639 640 641
1477 5 638 639 640 643
1478 28 563 561 562 557
1479 29 563 561 562 565
1480 26 639 561 562 557
1481 27 639 561 562 565
1482 33 562 561 563 558
1483 32 562 561 563 559
1484 31 639 561 563 558
1485 30 639 561 563 559
1486 13 562 561 639 638
1487 15 562 561 639 640
1488 14 563 561 639 638
1489 16 563 561 639 640
1490 34 556 557 562 561
1491 35 556 557 562 565
1492 35 564 557 562 561
1493 36 564 557 562 565
1494 55 667 668 671 672
1495 55 667 668 671 673
1496 56 667 668 671 674
1497 57 669 668 671 672
1498 57 669 668 671 673
1499 58 669 668 671 674
1500 57 670 668 671 672
1501 57 670 668 671 673
1502 58 670 668 671 674
1503 59 668 671 674 675
1504 59 668 671 674 676
1505 60 668 671 674 677
1506 61 672 671 674 675
1507 61 672 671 674 676
1508 62 672 671 674 677
1509 61 673 671 674 675
1510 61 673 671 674 676
1511 62 673 671 674 677
1512 62 671 674 677 678
1513 62 671 674 677 679
1514 63 671 674 677 680
1515 61 675 674 677 678
1516 61 675 674 677 679
1517 62 675 674 677 680
1518 61 676 674 677 678
1519 61 676 674 677 679
1520 62 676 674 677 680
1521 46 657 658 659 660
1522 47 657 658 659 667
1523 48 663 658 659 660
1524 49 663 658 659 667
1525 45 660 661 662 657
1526 43 660 661 662 666
1527 43 665 661 662 657
1528 52 665 661 662 666
1529 42 659 660 661 662
1530 51 659 660 661 665
1531 43 664 660 661 662
1532 52 664 660 661 665
1533 46 658 659 660 661
1534 48 658 659 660 664
1535 47 667 659 660 661
1536 49 667 659 660 664
1537 50 658 659 667 668
1538 50 660 659 667 668
1539 53 659 667 668 669
1540 53 659 667 668 670
1541 54 659 667 668 671
1542 55 485 486 489 490
1543 55 485 486 489 491
1544 56 485 486 489 492
1545 57 487 486 489 490
1546 57 487 486 489 491
1547 58 487 486 489 492
1548 57 488 486 489 490
1549 57 488 486 489 491
1550 58 488 486 489 492
1551 53 477 485 486 487
1552 53 477 485 486 488
1553 54 477 485 486 489
1554 40 469 511 512 513
1555 41 469 511 512 517
1556 42 516 511 512 513
1557 43 516 511 512 517
1558 44 469 511 516 515
1559 41 469 511 516 520
1560 45 512 511 516 515
1561 43 512 511 516 520
1562 46 511 512 513 514
1563 47 511 512 513 521
1564 48 517 512 513 514
1565 49 517 512 513 521
1566 25 464 469 511 512
1567 25 464 469 511 516
1568 24 468 469 511 512
1569 24 468 469 511 516
1570 21 463 464 469 468
1571 22 463 464 469 511
1572 22 475 464 469 468
1573 23 475 464 469 511
1574 24 463 464 475 476
1575 24 463 464 475 480
1576 25 469 464 475 476
1577 25 469 464 475 480
1578 45 478 479 480 475
1579 43 478 479 480 484
1580 43 483 479 480 475
1581 52 483 479 480 484
1582 46 476 477 478 479
1583 48 476 477 478 482
1584 47 485 477 478 479
1585 49 485 477 478 482
1586 50 476 477 485 486
1587 50 478 477 485 486
1588 46 475 476 477 478
1589 47 475 476 477 485
1590 48 481 476 477 478
1591 49 481 476 477 485
1592 42 477 478 479 480
1593 51 477 478 479 483
1594 43 482 478 479 480
1595 52 482 478 479 483
1596 40 464 475 476 477
1597 41 464 475 476 481
1598 42 480 475 476 477
1599 43 480 475 476 481
1600 44 464 475 480 479
1601 41 464 475 480 484
1602 45 476 475 480 479
1603 43 476 475 480 484
1604 17 467 463 464 469
1605 18 467 463 464 475
1606 19 464 463 467 465
1607 20 464 463 467 472
1608 17 472 468 469 464
1609 18 472 468 469 511
1610 20 469 468 472 467
1611 19 469 468 472 470
1612 3 551 547 548 470
1613 1 551 547 548 549
1614 1 548 547 551 550
1615 3 548 547 551 556
1616 28 472 470 471 466
1617 29 472 470 471 474
1618 26 548 470 471 466
1619 27 548 470 471 474
1620 33 471 470 472 467
1621 32 471 470 472 468
1622 31 548 470 472 467
1623 30 548 470 472 468
1624 13 471 470 548 547
1625 15 471 470 548 549
1626 14 472 470 548 547
1627 16 472 470 548 549
1628 11 470 548 549 550
1629 12 470 548 549 552
1630 4 547 548 549 550
1631 5 547 548 549 552
1632 37 463 467 472 468
1633 38 463 467 472 470
1634 38 465 467 472 468
1635 39 465 467 472 470
1636 26 460 465 466 471
1637 27 460 465 466 473
1638 28 467 465 466 471
1639 29 467 465 466 473
1640 30 460 465 467 463
1641 31 460 465 467 472
1642 32 466 465 467 463
1643 33 466 465 467 472
1644 34 465 466 471 470
1645 35 465 466 471 474
1646 35 473 466 471 470
1647 36 473 466 471 474
1648 59 486 489 492 493
1649 59 486 489 492 494
1650 60 486 489 492 495
1651 61 490 489 492 493
1652 61 490 489 492 494
1653 62 490 489 492 495
1654 61 491 489 492 493
1655 61 491 489 492 494
1656 62 491 489 492 495
1657 62 489 492 495 496
1658 62 489 492 495 497
1659 63 489 492 495 498
1660 61 493 492 495 496
1661 61 493 492 495 497
1662 62 493 492 495 498
1663 61 494 492 495 496
1664 61 494 492 495 497
1665 62 494 492 495 498
1666 62 492 495 498 499
1667 62 492 495 498 500
1668 63 492 495 498 501
1669 61 496 495 498 499
1670 61 496 495 498 500
1671 62 496 495 498 501
1672 61 497 495 498 499
1673 61 497 495 498 500
1674 62 497 495 498 501
1675 62 495 498 501 502
1676 62 495 498 501 503
1677 63 495 498 501 504
1678 61 499 498 501 502
1679 61 499 498 501 503
1680 62 499 498 501 504
1681 61 500 498 501 502
1682 61 500 498 501 503
1683 62 500 498 501 504
1684 62 498 501 504 505
1685 62 498 501 504 506
1686 64 498 501 504 507
1687 61 502 501 504 505
1688 61 502 501 504 506
1689 65 502 501 504 507
1690 61 503 501 504 505
1691 61 503 501 504 506
1692 65 503 501 504 507
1693 66 683 686 689 690
1694 66 683 686 689 691
1695 66 683 686 689 692
1696 67 687 686 689 690
1697 67 687 686 689 691
1698 67 687 686 689 692
1699 67 688 686 689 690
1700 67 688 686 689 691
1701 67 688 686 689 692
1702 62 677 680 683 684
1703 62 677 680 683 685
1704 63 677 680 683 686
1705 61 681 680 683 684
1706 61 681 680 683 685
1707 62 681 680 683 686
1708 61 682 680 683 684
1709 61 682 680 683 685
1710 62 682 680 683 686
1711 62 680 683 686 687
1712 62 680 683 686 688
1713 64 680 683 686 689
1714 61 684 683 686 687
1715 61 684 683 686 688
1716 65 684 683 686 689
1717 61 685 683 686 687
1718 61 685 683 686 688
1719 65 685 683 686 689
1720 8 548 549 550 551
1721 9 548 549 550 553
1722 9 552 549 550 551
1723 10 552 549 550 553
1724 13 547 551 556 557
1725 14 547 551 556 558
1726 15 550 551 556 557
1727 16 550 551 556 558
1728 4 549 550 551 547
1729 11 549 550 551 556
1730 5 553 550 551 547
1731 12 553 550 551 556
1732 62 674 677 680 681
1733 62 674 677 680 682
1734 63 674 677 680 683
1735 61 678 677 680 681
1736 61 678 677 680 682
1737 62 678 677 680 683
1738 61 679 677 680 681
1739 61 679 677 680 682
1740 62 679 677 680 683
1741 66 501 504 507 508
1742 66 501 504 507 509
1743 66 501 504 507 510
1744 67 505 504 507 508
1745 67 505 504 507 509
1746 67 505 504 507 510
1747 67 506 504 507 508
1748 67 506 504 507 509
1749 67 506 504 507 510
1750 34 374 375 380 379
1751 35 374 375 380 383
1752 35 382 375 380 379
1753 36 382 375 380 383
1754 25 373 378 420 421
1755 25 373 378 420 425
1756 24 377 378 420 421
1757 24 377 378 420 425
1758 40 378 420 421 422
1759 41 378 420 421 426
1760 42 425 420 421 422
1761 43 425 420 421 426
1762 44 378 420 425 424
1763 41 378 420 425 429
1764 45 421 420 425 424
1765 43 421 420 425 429
1766 37 372 376 381 377
1767 38 372 376 381 379
1768 38 374 376 381 377
1769 39 374 376 381 379
1770 21 372 373 378 377
1771 22 372 373 378 420
1772 22 384 373 378 377
1773 23 384 373 378 420
1774 24 372 373 384 385
1775 24 372 373 384 389
1776 25 378 373 384 385
1777 25 378 373 384 389
1778 45 423 424 425 420
1779 43 423 424 425 429
1780 43 428 424 425 420
1781 52 428 424 425 429
1782 42 422 423 424 425
1783 51 422 423 424 428
1784 43 427 423 424 425
1785 52 427 423 424 428
1786 4 458 459 460 456
1787 11 458 459 460 465
1788 5 462 459 460 456
1789 12 462 459 460 465
1790 8 457 458 459 460
1791 9 457 458 459 462
1792 9 461 458 459 460
1793 10 461 458 459 462
1794 3 460 456 457 379
1795 1 460 456 457 458
1796 1 457 456 460 459
1797 3 457 456 460 465
1798 13 456 460 465 466
1799 14 456 460 465 467
1800 15 459 460 465 466
1801 16 459 460 465 467
1802 11 379 457 458 459
1803 12 379 457 458 461
1804 4 456 457 458 459
1805 5 456 457 458 461
1806 28 381 379 380 375
1807 29 381 379 380 383
1808 26 457 379 380 375
1809 27 457 379 380 383
1810 33 380 379 381 376
1811 32 380 379 381 377
1812 31 457 379 381 376
1813 30 457 379 381 377
1814 13 380 379 457 456
1815 15 380 379 457 458
1816 14 381 379 457 456
1817 16 381 379 457 458
1818 17 381 377 378 373
1819 18 381 377 378 420
1820 20 378 377 381 376
1821 19 378 377 381 379
1822 46 420 421 422 423
1823 47 420 421 422 430
1824 48 426 421 422 423
1825 49 426 421 422 430
1826 46 421 422 423 424
1827 48 421 422 423 427
1828 47 430 422 423 424
1829 49 430 422 423 427
1830 50 421 422 430 431
1831 50 423 422 430 431
1832 53 422 430 431 432
1833 53 422 430 431 433
1834 54 422 430 431 434
1835 55 430 431 434 435
1836 55 430 431 434 436
1837 56 430 431 434 437
1838 57 432 431 434 435
1839 57 432 431 434 436
1840 58 432 431 434 437
1841 57 433 431 434 435
1842 57 433 431 434 436
1843 58 433 431 434 437
1844 59 431 434 437 438
1845 59 431 434 437 439
1846 60 431 434 437 440
1847 61 435 434 437 438
1848 61 435 434 437 439
1849 62 435 434 437 440
1850 61 436 434 437 438
1851 61 436 434 437 439
1852 62 436 434 437 440
1853 62 437 440 443 444
1854 62 437 440 443 445
1855 63 437 440 443 446
1856 61 441 440 443 444
1857 61 441 440 443 445
1858 62 441 440 443 446
1859 61 442 440 443 444
1860 61 442 440 443 445
1861 62 442 440 443 446
1862 62 434 437 440 441
1863 62 434 437 440 442
1864 63 434 437 440 443
1865 61 438 437 440 441
1866 61 438 437 440 442
1867 62 438 437 440 443
1868 61 439 437 440 441
1869 61 439 437 440 442
1870 62 439 437 440 443
1871 66 319 322 325 326
1872 66 319 322 325 327
1873 66 319 322 325 328
1874 67 323 322 325 326
1875 67 323 322 325 327
1876 67 323 322 325 328
1877 67 324 322 325 326
1878 67 324 322 325 327
1879 67 324 322 325 328
1880 62 316 319 322 323
1881 62 316 319 322 324
1882 64 316 319 322 325
1883 61 320 319 322 323
1884 61 320 319 322 324
1885 65 320 319 322 325
1886 61 321 319 322 323
1887 61 321 319 322 324
1888 65 321 319 322 325
1889 45 332 333 334 329
1890 43 332 333 334 338
1891 43 337 333 334 329
1892 52 337 333 334 338
1893 42 331 332 333 334
1894 51 331 332 333 337
1895 43 336 332 333 334
1896 52 336 332 333 337
1897 40 287 329 330 331
1898 41 287 329 330 335
1899 42 334 329 330 331
1900 43 334 329 330 335
1901 44 287 329 334 333
1902 41 287 329 334 338
1903 45 330 329 334 333
1904 43 330 329 334 338
1905 46 330 331 332 333
1906 48 330 331 332 336
1907 47 339 331 332 333
1908 49 339 331 332 336
1909 50 330 331 339 340
1910 50 332 331 339 340
1911 3 369 365 366 288
1912 1 369 365 366 367
1913 1 366 365 369 368
1914 3 366 365 369 374
1915 46 329 330 331 332
1916 47 329 330 331 339
1917 48 335 330 331 332
1918 49 335 330 331 339
1919 25 282 287 329 330
1920 25 282 287 329 334
1921 24 286 287 329 330
1922 24 286 287 329 334
1923 17 290 286 287 282
1924 18 290 286 287 329
1925 20 287 286 290 285
1926 19 287 286 290 288
1927 11 288 366 367 368
1928 12 288 366 367 370
1929 4 365 366 367 368
1930 5 365 366 367 370
1931 8 366 367 368 369
1932 9 366 367 368 371
1933 9 370 367 368 369
1934 10 370 367 368 371
1935 26 369 374 375 380
1936 27 369 374 375 382
1937 28 376 374 375 380
1938 29 376 374 375 382
1939 30 369 374 376 372
1940 31 369 374 376 381
1941 32 375 374 376 372
1942 33 375 374 376 381
1943 13 365 369 374 375
1944 14 365 369 374 376
1945 15 368 369 374 375
1946 16 368 369 374 376
1947 4 367 368 369 365
1948 11 367 368 369 374
1949 5 371 368 369 365
1950 12 371 368 369 374
1951 17 376 372 373 378
1952 18 376 372 373 384
1953 19 373 372 376 374
1954 20 373 372 376 381
1955 55 394 395 398 399
1956 55 394 395 398 400
1957 56 394 395 398 401
1958 57 396 395 398 399
1959 57 396 395 398 400
1960 58 396 395 398 401
1961 57 397 395 398 399
1962 57 397 395 398 400
1963 58 397 395 398 401
1964 59 395 398 401 402
1965 59 395 398 401 403
1966 60 395 398 401 404
1967 61 399 398 401 402
1968 61 399 398 401 403
1969 62 399 398 401 404
1970 61 400 398 401 402
1971 61 400 398 401 403
1972 62 400 398 401 404
1973 46 384 385 386 387
1974 47 384 385 386 394
1975 48 390 385 386 387
1976 49 390 385 386 394
1977 40 373 384 385 386
1978 41 373 384 385 390
1979 42 389 384 385 386
1980 43 389 384 385 390
1981 44 373 384 389 388
1982 41 373 384 389 393
1983 45 385 384 389 388
1984 43 385 384 389 393
1985 28 290 288 289 284
1986 29 290 288 289 292
1987 26 366 288 289 284
1988 27 366 288 289 292
1989 33 289 288 290 285
1990 32 289 288 290 286
1991 31 366 288 290 285
1992 30 366 288 290 286
1993 13 289 288 366 365
1994 15 289 288 366 367
1995 14 290 288 366 365
1996 16 290 288 366 367
1997 62 398 401 404 405
1998 62 398 401 404 406
1999 63 398 401 404 407
2000 61 402 401 404 405
2001 61 402 401 404 406
2002 62 402 401 404 407
2003 61 403 401 404 405
2004 61 403 401 404 406
2005 62 403 401 404 407
2006 53 386 394 395 396
2007 53 386 394 395 397
2008 54 386 394 395 398
2009 46 385 386 387 388
2010 48 385 386 387 391
2011 47 394 386 387 388
2012 49 394 386 387 391
2013 50 385 386 394 395
2014 50 387 386 394 395
2015 42 386 387 388 389
2016 51 386 387 388 392
2017 43 391 387 388 389
2018 52 391 387 388 392
2019 45 387 388 389 384
2020 43 387 388 389 393
2021 43 392 388 389 384
2022 52 392 388 389 393
2023 66 446 449 452 453
2024 66 446 449 452 454
2025 66 446 449 452 455
2026 67 450 449 452 453
2027 67 450 449 452 454
2028 67 450 449 452 455
2029 67 451 449 452 453
2030 67 451 449 452 454
2031 67 451 449 452 455
2032 62 443 446 449 450
2033 62 443 446 449 451
2034 64 443 446 449 452
2035 61 447 446 449 450
2036 61 447 446 449 451
2037 65 447 446 449 452
2038 61 448 446 449 450
2039 61 448 446 449 451
2040 65 448 446 449 452
2041 62 440 443 446 447
2042 62 440 443 446 448
2043 63 440 443 446 449
2044 61 444 443 446 447
2045 61 444 443 446 448
2046 62 444 443 446 449
2047 61 445 443 446 447
2048 61 445 443 446 448
2049 62 445 443 446 449
2050 62 313 316 319 320
2051 62 313 316 319 321
2052 63 313 316 319 322
2053 61 317 316 319 320
2054 61 317 316 319 321
2055 62 317 316 319 322
2056 61 318 316 319 320
2057 61 318 316 319 321
2058 62 318 316 319 322
2059 62 307 310 313 314
2060 62 307 310 313 315
2061 63 307 310 313 316
2062 61 311 310 313 314
2063 61 311 310 313 315
2064 62 311 310 313 316
2065 61 312 310 313 314
2066 61 312 310 313 315
2067 62 312 310 313 316
2068 59 304 307 310 311
2069 59 304 307 310 312
2070 60 304 307 310 313
2071 61 308 307 310 311
2072 61 308 307 310 312
2073 62 308 307 310 313
2074 61 309 307 310 311
2075 61 309 307 310 312
2076 62 309 307 310 313
2077 62 310 313 316 317
2078 62 310 313 316 318
2079 63 310 313 316 319
2080 61 314 313 316 317
2081 61 314 313 316 318
2082 62 314 313 316 319
2083 61 315 313 316 317
2084 61 315 313 316 318
2085 62 315 313 316 319
2086 55 303 304 307 308
2087 55 303 304 307 309
2088 56 303 304 307 310
2089 57 305 304 307 308
2090 57 305 304 307 309
2091 58 305 304 307 310
2092 57 306 304 307 308
2093 57 306 304 307 309
2094 58 306 304 307 310
2095 53 295 303 304 305
2096 53 295 303 304 306
2097 54 295 303 304 307
2098 62 161 164 167 168
2099 62 161 164 167 169
2100 63 161 164 167 170
2101 61 165 164 167 168
2102 61 165 164 167 169
2103 62 165 164 167 170
2104 61 166 164 167 168
2105 61 166 164 167 169
2106 62 166 164 167 170
2107 59 158 161 164 165
2108 59 158 161 164 166
2109 60 158 161 164 167
2110 61 162 161 164 165
2111 61 162 161 164 166
2112 62 162 161 164 167
2113 61 163 161 164 165
2114 61 163 161 164 166
2115 62 163 161 164 167
2116 42 295 296 297 298
2117 51 295 296 297 301
2118 43 300 296 297 298
2119 52 300 296 297 301
2120 62 222 225 228 229
2121 62 222 225 228 230
2122 63 222 225 228 231
2123 61 226 225 228 229
2124 61 226 225 228 230
2125 62 226 225 228 231
2126 61 227 225 228 229
2127 61 227 225 228 230
2128 62 227 225 228 231
2129 62 170 173 176 177
2130 62 170 173 176 178
2131 64 170 173 176 179
2132 61 174 173 176 177
2133 61 174 173 176 178
2134 65 174 173 176 179
2135 61 175 173 176 177
2136 61 175 173 176 178
2137 65 175 173 176 179
2138 62 167 170 173 174
2139 62 167 170 173 175
2140 63 167 170 173 176
2141 61 171 170 173 174
2142 61 171 170 173 175
2143 62 171 170 173 176
2144 61 172 170 173 174
2145 61 172 170 173 175
2146 62 172 170 173 176
2147 62 164 167 170 171
2148 62 164 167 170 172
2149 63 164 167 170 173
2150 61 168 167 170 171
2151 61 168 167 170 172
2152 62 168 167 170 173
2153 61 169 167 170 171
2154 61 169 167 170 172
2155 62 169 167 170 173
2156 46 294 295 296 297
2157 48 294 295 296 300
2158 47 303 295 296 297
2159 49 303 295 296 300
2160 50 294 295 303 304
2161 50 296 295 303 304
2162 46 293 294 295 296
2163 47 293 294 295 303
2164 48 299 294 295 296
2165 49 299 294 295 303
2166 3 278 274 275 197
2167 1 278 274 275 276
2168 1 275 274 278 277
2169 3 275 274 278 283
2170 11 197 275 276 277
2171 12 197 275 276 279
2172 4 274 275 276 277
2173 5 274 275 276 279
2174 62 401 404 407 408
2175 62 401 404 407 409
2176 63 401 404 407 410
2177 61 405 404 407 408
2178 61 405 404 407 409
2179 62 405 404 407 410
2180 61 406 404 407 408
2181 61 406 404 407 409
2182 62 406 404 407 410
2183 62 404 407 410 411
2184 62 404 407 410 412
2185 63 404 407 410 413
2186 61 408 407 410 411
2187 61 408 407 410 412
2188 62 408 407 410 413
2189 61 409 407 410 411
2190 61 409 407 410 412
2191 62 409 407 410 413
2192 62 407 410 413 414
2193 62 407 410 413 415
2194 64 407 410 413 416
2195 61 411 410 413 414
2196 61 411 410 413 415
2197 65 411 410 413 416
2198 61 412 410 413 414
2199 61 412 410 413 415
2200 65 412 410 413 416
2201 53 331 339 340 341
2202 53 331 339 340 342
2203 54 331 339 340 343
2204 55 339 340 343 344
2205 55 339 340 343 345
2206 56 339 340 343 346
2207 57 341 340 343 344
2208 57 341 340 343 345
2209 58 341 340 343 346
2210 57 342 340 343 344
2211 57 342 340 343 345
2212 58 342 340 343 346
2213 45 296 297 298 293
2214 43 296 297 298 302
2215 43 301 297 298 293
2216 52 301 297 298 302
2217 40 282 293 294 295
2218 41 282 293 294 299
2219 42 298 293 294 295
2220 43 298 293 294 299
2221 44 282 293 298 297
2222 41 282 293 298 302
2223 45 294 293 298 297
2224 43 294 293 298 302
2225 21 281 282 287 286
2226 22 281 282 287 329
2227 22 293 282 287 286
2228 23 293 282 287 329
2229 24 281 282 293 294
2230 24 281 282 293 298
2231 25 287 282 293 294
2232 25 287 282 293 298
2233 55 248 249 252 253
2234 55 248 249 252 254
2235 56 248 249 252 255
2236 57 250 249 252 253
2237 57 250 249 252 254
2238 58 250 249 252 255
2239 57 251 249 252 253
2240 57 251 249 252 254
2241 58 251 249 252 255
2242 53 240 248 249 250
2243 53 240 248 249 251
2244 54 240 248 249 252
2245 17 285 281 282 287
2246 18 285 281 282 293
2247 19 282 281 285 283
2248 20 282 281 285 290
2249 37 281 285 290 286
2250 38 281 285 290 288
2251 38 283 285 290 286
2252 39 283 285 290 288
2253 59 249 252 255 256
2254 59 249 252 255 257
2255 60 249 252 255 258
2256 61 253 252 255 256
2257 61 253 252 255 257
2258 62 253 252 255 258
2259 61 254 252 255 256
2260 61 254 252 255 257
2261 62 254 252 255 258
2262 46 238 239 240 241
2263 47 238 239 240 248
2264 48 244 239 240 241
2265 49 244 239 240 248
2266 46 239 240 241 242
2267 48 239 240 241 245
2268 47 248 240 241 242
2269 49 248 240 241 245
2270 50 239 240 248 249
2271 50 241 240 248 249
2272 42 240 241 242 243
2273 51 240 241 242 246
2274 43 245 241 242 243
2275 52 245 241 242 246
2276 4 276 277 278 274
2277 11 276 277 278 283
2278 5 280 277 278 274
2279 12 280 277 278 283
2280 8 275 276 277 278
2281 9 275 276 277 280
2282 9 279 276 277 278
2283 10 279 276 277 280
2284 13 274 278 283 284
2285 14 274 278 283 285
2286 15 277 278 283 284
2287 16 277 278 283 285
2288 26 278 283 284 289
2289 27 278 283 284 291
2290 28 285 283 284 289
2291 29 285 283 284 291
2292 30 278 283 285 281
2293 31 278 283 285 290
2294 32 284 283 285 281
2295 33 284 283 285 290
2296 34 283 284 289 288
2297 35 283 284 289 292
2298 35 291 284 289 288
2299 36 291 284 289 292
2300 62 252 255 258 259
2301 62 252 255 258 260
2302 63 252 255 258 261
2303 61 256 255 258 259
2304 61 256 255 258 260
2305 62 256 255 258 261
2306 61 257 255 258 259
2307 61 257 255 258 260
2308 62 257 255 258 261
2309 66 410 413 416 417
2310 66 410 413 416 418
2311 66 410 413 416 419
2312 67 414 413 416 417
2313 67 414 413 416 418
2314 67 414 413 416 419
2315 67 415 413 416 417
2316 67 415 413 416 418
2317 67 415 413 416 419
2318 59 340 343 346 347
2319 59 340 343 346 348
2320 60 340 343 346 349
2321 61 344 343 346 347
2322 61 344 343 346 348
2323 62 344 343 346 349
2324 61 345 343 346 347
2325 61 345 343 346 348
2326 62 345 343 346 349
2327 66 355 358 361 362
2328 66 355 358 361 363
2329 66 355 358 361 364
2330 67 359 358 361 362
2331 67 359 358 361 363
2332 67 359 358 361 364
2333 67 360 358 361 362
2334 67 360 358 361 363
2335 67 360 358 361 364
2336 62 352 355 358 359
2337 62 352 355 358 360
2338 64 352 355 358 361
2339 61 356 355 358 359
2340 61 356 355 358 360
2341 65 356 355 358 361
2342 61 357 355 358 359
2343 61 357 355 358 360
2344 65 357 355 358 361
2345 62 349 352 355 356
2346 62 349 352 355 357
2347 63 349 352 355 358
2348 61 353 352 355 356
2349 61 353 352 355 357
2350 62 353 352 355 358
2351 61 354 352 355 356
2352 61 354 352 355 357
2353 62 354 352 355 358
2354 62 346 349 352 353
2355 62 346 349 352 354
2356 63 346 349 352 355
2357 61 350 349 352 353
2358 61 350 349 352 354
2359 62 350 349 352 355
2360 61 351 349 352 353
2361 61 351 349 352 354
2362 62 351 349 352 355
2363 62 343 346 349 350
2364 62 343 346 349 351
2365 63 343 346 349 352
2366 61 347 346 349 350
2367 61 347 346 349 351
2368 62 347 346 349 352
2369 61 348 346 349 350
2370 61 348 346 349 351
2371 62 348 346 349 352
2372 62 258 261 264 265
2373 62 258 261 264 266
2374 63 258 261 264 267
2375 61 262 261 264 265
2376 61 262 261 264 266
2377 62 262 261 264 267
2378 61 263 261 264 265
2379 61 263 261 264 266
2380 62 263 261 264 267
2381 62 255 258 261 262
2382 62 255 258 261 263
2383 63 255 258 261 264
2384 61 259 258 261 262
2385 61 259 258 261 263
2386 62 259 258 261 264
2387 61 260 258 261 262
2388 61 260 258 261 263
2389 62 260 258 261 264
2390 66 264 267 270 271
2391 66 264 267 270 272
2392 66 264 267 270 273
2393 67 268 267 270 271
2394 67 268 267 270 272
2395 67 268 267 270 273
2396 67 269 267 270 271
2397 67 269 267 270 272
2398 67 269 267 270 273
2399 62 261 264 267 268
2400 62 261 264 267 269
2401 64 261 264 267 270
2402 61 265 264 267 268
2403 61 265 264 267 269
2404 65 265 264 267 270
2405 61 266 264 267 268
2406 61 266 264 267 269
2407 65 266 264 267 270
2408 66 137 140 143 144
2409 66 137 140 143 145
2410 66 137 140 143 146
2411 67 141 140 143 144
2412 67 141 140 143 145
2413 67 141 140 143 146
2414 67 142 140 143 144
2415 67 142 140 143 145
2416 67 142 140 143 146
2417 62 131 134 137 138
2418 62 131 134 137 139
2419 63 131 134 137 140
2420 61 135 134 137 138
2421 61 135 134 137 139
2422 62 135 134 137 140
2423 61 136 134 137 138
2424 61 136 134 137 139
2425 62 136 134 137 140
2426 62 128 131 134 135
2427 62 128 131 134 136
2428 63 128 131 134 137
2429 61 132 131 134 135
2430 61 132 131 134 136
2431 62 132 131 134 137
2432 61 133 131 134 135
2433 61 133 131 134 136
2434 62 133 131 134 137
2435 42 149 150 151 152
2436 51 149 150 151 155
2437 43 154 150 151 152
2438 52 154 150 151 155
2439 45 150 151 152 147
2440 43 150 151 152 156
2441 43 155 151 152 147
2442 52 155 151 152 156
2443 66 228 231 234 235
2444 66 228 231 234 236
2445 66 228 231 234 237
2446 67 232 231 234 235
2447 67 232 231 234 236
2448 67 232 231 234 237
2449 67 233 231 234 235
2450 67 233 231 234 236
2451 67 233 231 234 237
2452 40 105 147 148 149
2453 41 105 147 148 153
2454 42 152 147 148 149
2455 43 152 147 148 153
2456 44 105 147 152 151
2457 41 105 147 152 156
2458 45 148 147 152 151
2459 43 148 147 152 156
2460 53 149 157 158 159
2461 53 149 157 158 160
2462 54 149 157 158 161
2463 55 157 158 161 162
2464 55 157 158 161 163
2465 56 157 158 161 164
2466 57 159 158 161 162
2467 57 159 158 161 163
2468 58 159 158 161 164
2469 57 160 158 161 162
2470 57 160 158 161 163
2471 58 160 158 161 164
2472 46 147 148 149 150
2473 47 147 148 149 157
2474 48 153 148 149 150
2475 49 153 148 149 157
2476 46 148 149 150 151
2477 48 148 149 150 154
2478 47 157 149 150 151
2479 49 157 149 150 154
2480 50 148 149 157 158
2481 50 150 149 157 158
2482 62 225 228 231 232
2483 62 225 228 231 233
2484 64 225 228 231 234
2485 61 229 228 231 232
2486 61 229 228 231 233
2487 65 229 228 231 234
2488 61 230 228 231 232
2489 61 230 228 231 233
2490 65 230 228 231 234
2491 62 219 222 225 226
2492 62 219 222 225 227
2493 63 219 222 225 228
2494 61 223 222 225 226
2495 61 223 222 225 227
2496 62 223 222 225 228
2497 61 224 222 225 226
2498 61 224 222 225 227
2499 62 224 222 225 228
2500 66 173 176 179 180
2501 66 173 176 179 181
2502 66 173 176 179 182
2503 67 177 176 179 180
2504 67 177 176 179 181
2505 67 177 176 179 182
2506 67 178 176 179 180
2507 67 178 176 179 181
2508 67 178 176 179 182
2509 4 185 186 187 183
2510 11 185 186 187 192
2511 5 189 186 187 183
2512 12 189 186 187 192
2513 13 183 187 192 193
2514 14 183 187 192 194
2515 15 186 187 192 193
2516 16 186 187 192 194
2517 3 187 183 184 106
2518 1 187 183 184 185
2519 1 184 183 187 186
2520 3 184 183 187 192
2521 34 192 193 198 197
2522 35 192 193 198 201
2523 35 200 193 198 197
2524 36 200 193 198 201
2525 26 187 192 193 198
2526 27 187 192 193 200
2527 28 194 192 193 198
2528 29 194 192 193 200
2529 30 187 192 194 190
2530 31 187 192 194 199
2531 32 193 192 194 190
2532 33 193 192 194 199
2533 28 199 197 198 193
2534 29 199 197 198 201
2535 26 275 197 198 193
2536 27 275 197 198 201
2537 33 198 197 199 194
2538 32 198 197 199 195
2539 31 275 197 199 194
2540 30 275 197 199 195
2541 13 198 197 275 274
2542 15 198 197 275 276
2543 14 199 197 275 274
2544 16 199 197 275 276
2545 37 190 194 199 195
2546 38 190 194 199 197
2547 38 192 194 199 195
2548 39 192 194 199 197
2549 62 216 219 222 223
2550 62 216 219 222 224
2551 63 216 219 222 225
2552 61 220 219 222 223
2553 61 220 219 222 224
2554 62 220 219 222 225
2555 61 221 219 222 223
2556 61 221 219 222 224
2557 62 221 219 222 225
2558 59 213 216 219 220
2559 59 213 216 219 221
2560 60 213 216 219 222
2561 61 217 216 219 220
2562 61 217 216 219 221
2563 62 217 216 219 222
2564 61 218 216 219 220
2565 61 218 216 219 221
2566 62 218 216 219 222
2567 55 212 213 216 217
2568 55 212 213 216 218
2569 56 212 213 216 219
2570 57 214 213 216 217
2571 57 214 213 216 218
2572 58 214 213 216 219
2573 57 215 213 216 217
2574 57 215 213 216 218
2575 58 215 213 216 219
2576 46 202 203 204 205
2577 47 202 203 204 212
2578 48 208 203 204 205
2579 49 208 203 204 212
2580 53 204 212 213 214
2581 53 204 212 213 215
2582 54 204 212 213 216
2583 46 203 204 205 206
2584 48 203 204 205 209
2585 47 212 204 205 206
2586 49 212 204 205 209
2587 50 203 204 212 213
2588 50 205 204 212 213
2589 42 204 205 206 207
2590 51 204 205 206 210
2591 43 209 205 206 207
2592 52 209 205 206 210
2593 45 205 206 207 202
2594 43 205 206 207 211
2595 43 210 206 207 202
2596 52 210 206 207 211
2597 17 194 190 191 196
2598 18 194 190 191 202
2599 19 191 190 194 192
2600 20 191 190 194 199
2601 25 191 196 238 239
2602 25 191 196 238 243
2603 24 195 196 238 239
2604 24 195 196 238 243
2605 21 190 191 196 195
2606 22 190 191 196 238
2607 22 202 191 196 195
2608 23 202 191 196 238
2609 24 190 191 202 203
2610 24 190 191 202 207
2611 25 196 191 202 203
2612 25 196 191 202 207
2613 40 196 238 239 240
2614 41 196 238 239 244
2615 42 243 238 239 240
2616 43 243 238 239 244
2617 44 196 238 243 242
2618 41 196 238 243 247
2619 45 239 238 243 242
2620 43 239 238 243 247
2621 45 241 242 243 238
2622 43 241 242 243 247
2623 43 246 242 243 238
2624 52 246 242 243 247
2625 40 191 202 203 204
2626 41 191 202 203 208
2627 42 207 202 203 204
2628 43 207 202 203 208
2629 44 191 202 207 206
2630 41 191 202 207 211
2631 45 203 202 207 206
2632 43 203 202 207 211
2633 17 199 195 196 191
2634 18 199 195 196 238
2635 20 196 195 199 194
2636 19 196 195 199 197
2637 62 134 137 140 141
2638 62 134 137 140 142
2639 64 134 137 140 143
2640 61 138 137 140 141
2641 61 138 137 140 142
2642 65 138 137 140 143
2643 61 139 137 140 141
2644 61 139 137 140 142
2645 65 139 137 140 143
2646 62 125 128 131 132
2647 62 125 128 131 133
2648 63 125 128 131 134
2649 61 129 128 131 132
2650 61 129 128 131 133
2651 62 129 128 131 134
2652 61 130 128 131 132
2653 61 130 128 131 133
2654 62 130 128 131 134
2655 59 122 125 128 129
2656 59 122 125 128 130
2657 60 122 125 128 131
2658 61 126 125 128 129
2659 61 126 125 128 130
2660 62 126 125 128 131
2661 61 127 125 128 129
2662 61 127 125 128 130
2663 62 127 125 128 131
2664 55 121 122 125 126
2665 55 121 122 125 127
2666 56 121 122 125 128
2667 57 123 122 125 126
2668 57 123 122 125 127
2669 58 123 122 125 128
2670 57 124 122 125 126
2671 57 124 122 125 127
2672 58 124 122 125 128
2673 46 112 113 114 115
2674 48 112 113 114 118
2675 47 121 113 114 115
2676 49 121 113 114 118
2677 50 112 113 121 122
2678 50 114 113 121 122
2679 53 113 121 122 123
2680 53 113 121 122 124
2681 54 113 121 122 125
2682 42 113 114 115 116
2683 51 113 114 115 119
2684 43 118 114 115 116
2685 52 118 114 115 119
2686 45 114 115 116 111
2687 43 114 115 116 120
2688 43 119 115 116 111
2689 52 119 115 116 120
2690 46 111 112 113 114
2691 47 111 112 113 121
2692 48 117 112 113 114
2693 49 117 112 113 121
2694 25 100 105 147 148
2695 25 100 105 147 152
2696 24 104 105 147 148
2697 24 104 105 147 152
2698 17 108 104 105 100
2699 18 108 104 105 147
2700 20 105 104 108 103
2701 19 105 104 108 106
2702 40 100 111 112 113
2703 41 100 111 112 117
2704 42 116 111 112 113
2705 43 116 111 112 117
2706 44 100 111 116 115
2707 41 100 111 116 120
2708 45 112 111 116 115
2709 43 112 111 116 120
2710 17 103 99 100 105
2711 18 103 99 100 111
2712 19 100 99 103 101
2713 20 100 99 103 108
2714 21 99 100 105 104
2715 22 99 100 105 147
2716 22 111 100 105 104
2717 23 111 100 105 147
2718 24 99 100 111 112
2719 24 99 100 111 116
2720 25 105 100 111 112
2721 25 105 100 111 116
2722 13 92 96 101 102
2723 14 92 96 101 103
2724 15 95 96 101 102
2725 16 95 96 101 103
2726 3 96 92 93 15
2727 1 96 92 93 94
2728 1 93 92 96 95
2729 3 93 92 96 101
2730 26 96 101 102 107
2731 27 96 101 102 109
2732 28 103 101 102 107
2733 29 103 101 102 109
2734 30 96 101 103 99
2735 31 96 101 103 108
2736 32 102 101 103 99
2737 33 102 101 103 108
2738 37 99 103 108 104
2739 38 99 103 108 106
2740 38 101 103 108 104
2741 39 101 103 108 106
2742 28 108 106 107 102
2743 29 108 106 107 110
2744 26 184 106 107 102
2745 27 184 106 107 110
2746 33 107 106 108 103
2747 32 107 106 108 104
2748 31 184 106 108 103
2749 30 184 106 108 104
2750 13 107 106 184 183
2751 15 107 106 184 185
2752 14 108 106 184 183
2753 16 108 106 184 185
2754 34 101 102 107 106
2755 35 101 102 107 110
2756 35 109 102 107 106
2757 36 109 102 107 110
2758 8 184 185 186 187
2759 9 184 185 186 189
2760 9 188 185 186 187
2761 10 188 185 186 189
2762 11 106 184 185 186
2763 12 106 184 185 188
2764 4 183 184 185 186
2765 5 183 184 185 188
2766 4 94 95 96 92
2767 11 94 95 96 101
2768 5 98 95 96 92
2769 12 98 95 96 101
2770 28 17 15 16 11
2771 29 17 15 16 19
2772 26 93 15 16 11
2773 27 93 15 16 19
2774 33 16 15 17 12
2775 32 16 15 17 13
2776 31 93 15 17 12
2777 30 93 15 17 13
2778 13 16 15 93 92
2779 15 16 15 93 94
2780 14 17 15 93 92
2781 16 17 15 93 94
2782 8 93 94 95 96
2783 9 93 94 95 98
2784 9 97 94 95 96
2785 10 97 94 95 98
2786 11 15 93 94 95
2787 12 15 93 94 97
2788 4 92 93 94 95
2789 5 92 93 94 97
2790 62 73 76 79 80
2791 62 73 76 79 81
2792 63 73 76 79 82
2793 61 77 76 79 80
2794 61 77 76 79 81
2795 62 77 76 79 82
2796 61 78 76 79 80
2797 61 78 76 79 81
2798 62 78 76 79 82
2799 59 67 70 73 74
2800 59 67 70 73 75
2801 60 67 70 73 76
2802 61 71 70 73 74
2803 61 71 70 73 75
2804 62 71 70 73 76
2805 61 72 70 73 74
2806 61 72 70 73 75
2807 62 72 70 73 76
2808 62 70 73 76 77
2809 62 70 73 76 78
2810 63 70 73 76 79
2811 61 74 73 76 77
2812 61 74 73 76 78
2813 62 74 73 76 79
2814 61 75 73 76 77
2815 61 75 73 76 78
2816 62 75 73 76 79
2817 62 76 79 82 83
2818 62 76 79 82 84
2819 63 76 79 82 85
2820 61 80 79 82 83
2821 61 80 79 82 84
2822 62 80 79 82 85
2823 61 81 79 82 83
2824 61 81 79 82 84
2825 62 81 79 82 85
2826 66 82 85 88 89
2827 66 82 85 88 90
2828 66 82 85 88 91
2829 67 86 85 88 89
2830 67 86 85 88 90
2831 67 86 85 88 91
2832 67 87 85 88 89
2833 67 87 85 88 90
2834 67 87 85 88 91
2835 62 79 82 85 86
2836 62 79 82 85 87
2837 64 79 82 85 88
2838 61 83 82 85 86
2839 61 83 82 85 87
2840 65 83 82 85 88
2841 61 84 82 85 86
2842 61 84 82 85 87
2843 65 84 82 85 88
2844 34 10 11 16 15
2845 35 10 11 16 19
2846 35 18 11 16 15
2847 36 18 11 16 19
2848 4 3 4 5 1
2849 11 3 4 5 10
2850 5 7 4 5 1
2851 12 7 4 5 10
2852 8 2 3 4 5
2853 9 2 3 4 7
2854 9 6 3 4 5
2855 10 6 3 4 7
2856 4 1 2 3 4
2857 5 1 2 3 6
2858 6 1093 2 3 4
2859 7 1093 2 3 6
2860 13 1 5 10 11
2861 14 1 5 10 12
2862 15 4 5 10 11
2863 16 4 5 10 12
2864 26 5 10 11 16
2865 27 5 10 11 18
2866 28 12 10 11 16
2867 29 12 10 11 18
2868 30 5 10 12 8
2869 31 5 10 12 17
2870 32 11 10 12 8
2871 33 11 10 12 17
2872 1 5 1 2 3
2873 2 5 1 2 1093
2874 1 2 1 5 4
2875 3 2 1 5 10
2876 37 8 12 17 13
2877 38 8 12 17 15
2878 38 10 12 17 13
2879 39 10 12 17 15
2880 17 17 13 14 9
2881 18 17 13 14 56
2882 20 14 13 17 12
2883 19 14 13 17 15
2884 17 12 8 9 14
2885 18 12 8 9 20
2886 19 9 8 12 10
2887 20 9 8 12 17
2888 46 20 21 22 23
2889 47 20 21 22 30
2890 48 26 21 22 23
2891 49 26 21 22 30
2892 40 9 20 21 22
2893 41 9 20 21 26
2894 42 25 20 21 22
2895 43 25 20 21 26
2896 44 9 20 25 24
2897 41 9 20 25 29
2898 45 21 20 25 24
2899 43 21 20 25 29
2900 21 8 9 14 13
2901 22 8 9 14 56
2902 22 20 9 14 13
2903 23 20 9 14 56
2904 24 8 9 20 21
2905 24 8 9 20 25
2906 25 14 9 20 21
2907 25 14 9 20 25
2908 25 9 14 56 57
2909 25 9 14 56 61
2910 24 13 14 56 57
2911 24 13 14 56 61
2912 46 21 22 23 24
2913 48 21 22 23 27
2914 47 30 22 23 24
2915 49 30 22 23 27
2916 50 21 22 30 31
2917 50 23 22 30 31
2918 40 14 56 57 58
2919 41 14 56 57 62
2920 42 61 56 57 58
2921 43 61 56 57 62
2922 44 14 56 61 60
2923 41 14 56 61 65
2924 45 57 56 61 60
2925 43 57 56 61 65
2926 42 58 59 60 61
2927 51 58 59 60 64
2928 43 63 59 60 61
2929 52 63 59 60 64
2930 45 59 60 61 56
2931 43 59 60 61 65
2932 43 64 60 61 56
2933 52 64 60 61 65
2934 53 58 66 67 68
2935 53 58 66 67 69
2936 54 58 66 67 70
2937 46 57 58 59 60
2938 48 57 58 59 63
2939 47 66 58 59 60
2940 49 66 58 59 63
2941 50 57 58 66 67
2942 50 59 58 66 67
2943 55 66 67 70 71
2944 55 66 67 70 72
2945 56 66 67 70 73
2946 57 68 67 70 71
2947 57 68 67 70 72
2948 58 68 67 70 73
2949 57 69 67 70 71
2950 57 69 67 70 72
2951 58 69 67 70 73
2952 46 56 57 58 59
2953 47 56 57 58 66
2954 48 62 57 58 59
2955 49 62 57 58 66
2956 53 22 30 31 32
2957 53 22 30 31 33
2958 54 22 30 31 34
2959 42 22 23 24 25
2960 51 22 23 24 28
2961 43 27 23 24 25
2962 52 27 23 24 28
2963 45 23 24 25 20
2964 43 23 24 25 29
2965 43 28 24 25 20
2966 52 28 24 25 29
2967 62 37 40 43 44
2968 62 37 40 43 45
2969 63 37 40 43 46
2970 61 41 40 43 44
2971 61 41 40 43 45
2972 62 41 40 43 46
2973 61 42 40 43 44
2974 61 42 40 43 45
2975 62 42 40 43 46
2976 62 34 37 40 41
2977 62 34 37 40 42
2978 63 34 37 40 43
2979 61 38 37 40 41
2980 61 38 37 40 42
2981 62 38 37 40 43
2982 61 39 37 40 41
2983 61 39 37 40 42
2984 62 39 37 40 43
2985 62 40 43 46 47
2986 62 40 43 46 48
2987 63 40 43 46 49
2988 61 44 43 46 47
2989 61 44 43 46 48
2990 62 44 43 46 49
2991 61 45 43 46 47
2992 61 45 43 46 48
2993 62 45 43 46 49
2994 66 46 49 52 53
2995 66 46 49 52 54
2996 66 46 49 52 55
2997 67 50 49 52 53
2998 67 50 49 52 54
2999 67 50 49 52 55
3000 67 51 49 52 53
3001 67 51 49 52 54
3002 67 51 49 52 55
3003 62 43 46 49 50
3004 62 43 46 49 51
3005 64 43 46 49 52
3006 61 47 46 49 50
3007 61 47 46 49 51
3008 65 47 46 49 52
3009 61 48 46 49 50
3010 61 48 46 49 51
3011 65 48 46 49 52
3012 59 31 34 37 38
3013 59 31 34 37 39
3014 60 31 34 37 40
3015 61 35 34 37 38
3016 61 35 34 37 39
3017 62 35 34 37 40
3018 61 36 34 37 38
3019 61 36 34 37 39
3020 62 36 34 37 40

Impropers

1 12 970 973 969 968
2 2 1011 1018 1013 1009
3 1 1014 1016 1018 1013
4 1 1009 1011 1013 1018
5 3 1018 1009 1013 1011
6 2 1016 1013 1018 1014
7 3 1013 1014 1018 1016
8 4 1058 1062 1057 1015
9 14 1060 1062 1061 1065
10 15 1061 1066 1062 1057
11 8 1059 1061 1060 1064
12 14 1057 1061 1062 1066
13 5 1026 1010 1021 1022
14 5 1062 1015 1057 1058
15 6 1057 1059 1058 1063
16 13 1064 1059 1060 1061
17 15 1025 1030 1026 1021
18 8 1063 1057 1058 1059
19 14 1066 1057 1062 1061
20 4 1015 1058 1057 1062
21 11 1067 1058 1059 1060
22 7 1059 1063 1058 1057
23 10 1060 1067 1059 1058
24 15 1062 1065 1061 1060
25 9 1058 1060 1059 1067
26 14 1065 1060 1061 1062
27 12 1061 1064 1060 1059
28 10 933 940 932 931
29 10 969 976 968 967
30 6 966 968 967 972
31 13 973 968 969 970
32 9 967 969 968 976
33 14 974 969 970 971
34 4 924 967 966 971
35 11 976 967 968 969
36 12 879 882 878 877
37 8 877 879 878 882
38 14 875 879 880 884
39 9 876 878 877 885
40 14 883 878 879 880
41 15 880 883 879 878
42 4 876 880 875 833
43 14 878 880 879 883
44 4 919 931 930 935
45 11 940 931 932 933
46 6 930 932 931 936
47 13 937 932 933 934
48 6 875 877 876 881
49 13 882 877 878 879
50 4 833 876 875 880
51 11 885 876 877 878
52 7 968 972 967 966
53 8 972 966 967 968
54 14 975 966 971 970
55 3 922 923 927 925
56 5 971 924 966 967
57 5 935 919 930 931
58 4 931 935 930 919
59 14 933 935 934 938
60 8 936 930 931 932
61 14 939 930 935 934
62 3 927 918 922 920
63 4 967 971 966 924
64 14 969 971 970 974
65 8 968 970 969 973
66 14 966 970 971 975
67 15 971 974 970 969
68 7 932 936 931 930
69 15 970 975 971 966
70 10 878 885 877 876
71 1 918 920 922 927
72 2 925 922 927 923
73 1 923 925 927 922
74 2 920 927 922 918
75 8 1027 1021 1022 1023
76 14 1030 1021 1026 1025
77 7 1023 1027 1022 1021
78 4 1010 1022 1021 1026
79 11 1031 1022 1023 1024
80 6 1021 1023 1022 1027
81 13 1028 1023 1024 1025
82 4 1022 1026 1021 1010
83 14 1024 1026 1025 1029
84 10 1024 1031 1023 1022
85 9 1022 1024 1023 1031
86 14 1029 1024 1025 1026
87 8 1023 1025 1024 1028
88 14 1021 1025 1026 1030
89 15 1026 1029 1025 1024
90 12 1025 1028 1024 1023
91 4 785 789 784 742
92 14 787 789 788 792
93 12 843 846 842 841
94 10 842 849 841 840
95 15 788 793 789 784
96 12 934 937 933 932
97 15 789 792 788 787
98 12 788 791 787 786
99 8 786 788 787 791
100 14 784 788 789 793
101 9 785 787 786 794
102 14 792 787 788 789
103 15 844 847 843 842
104 8 841 843 842 846
105 14 839 843 844 848
106 4 840 844 839 828
107 14 842 844 843 847
108 15 843 848 844 839
109 9 840 842 841 849
110 14 847 842 843 844
111 6 839 841 840 845
112 13 846 841 842 843
113 5 844 828 839 840
114 8 845 839 840 841
115 14 848 839 844 843
116 4 828 840 839 844
117 11 849 840 841 842
118 7 841 845 840 839
119 6 784 786 785 790
120 13 791 786 787 788
121 10 787 794 786 785
122 3 836 827 831 829
123 8 881 875 876 877
124 14 884 875 880 879
125 8 932 934 933 937
126 14 930 934 935 939
127 9 931 933 932 940
128 14 938 933 934 935
129 15 934 939 935 930
130 15 879 884 880 875
131 15 935 938 934 933
132 5 880 833 875 876
133 3 831 832 836 834
134 2 834 831 836 832
135 1 827 829 831 836
136 2 829 836 831 827
137 7 877 881 876 875
138 1 832 834 836 831
139 10 751 758 750 749
140 12 752 755 751 750
141 9 749 751 750 758
142 14 756 751 752 753
143 15 753 756 752 751
144 8 750 752 751 755
145 14 748 752 753 757
146 6 748 750 749 754
147 13 755 750 751 752
148 7 750 754 749 748
149 4 737 749 748 753
150 11 758 749 750 751
151 8 754 748 749 750
152 14 757 748 753 752
153 4 749 753 748 737
154 14 751 753 752 756
155 15 752 757 753 748
156 5 789 742 784 785
157 5 753 737 748 749
158 3 745 736 740 738
159 2 738 745 740 736
160 2 743 740 745 741
161 1 736 738 740 745
162 4 742 785 784 789
163 11 794 785 786 787
164 8 790 784 785 786
165 14 793 784 789 788
166 3 740 741 745 743
167 7 786 790 785 784
168 1 741 743 745 740
169 15 607 610 606 605
170 10 605 612 604 603
171 12 606 609 605 604
172 9 603 605 604 612
173 14 610 605 606 607
174 6 602 604 603 608
175 13 609 604 605 606
176 8 604 606 605 609
177 14 602 606 607 611
178 4 560 603 602 607
179 11 612 603 604 605
180 7 604 608 603 602
181 2 652 649 654 650
182 3 654 645 649 647
183 1 645 647 649 654
184 1 650 652 654 649
185 2 647 654 649 645
186 15 661 666 662 657
187 3 649 650 654 652
188 5 662 646 657 658
189 7 695 699 694 693
190 8 699 693 694 695
191 14 702 693 698 697
192 5 698 651 693 694
193 6 693 695 694 699
194 13 700 695 696 697
195 10 696 703 695 694
196 4 651 694 693 698
197 11 703 694 695 696
198 4 694 698 693 651
199 14 696 698 697 701
200 8 695 697 696 700
201 14 693 697 698 702
202 9 694 696 695 703
203 14 701 696 697 698
204 8 663 657 658 659
205 14 666 657 662 661
206 4 658 662 657 646
207 14 660 662 661 665
208 15 697 702 698 693
209 12 697 700 696 695
210 15 698 701 697 696
211 12 570 573 569 568
212 15 571 574 570 569
213 9 567 569 568 576
214 14 574 569 570 571
215 15 516 519 515 514
216 8 513 515 514 518
217 14 511 515 516 520
218 9 512 514 513 521
219 14 519 514 515 516
220 12 515 518 514 513
221 6 511 513 512 517
222 13 518 513 514 515
223 15 606 611 607 602
224 4 603 607 602 560
225 14 605 607 606 610
226 8 608 602 603 604
227 14 611 602 607 606
228 7 568 572 567 566
229 8 572 566 567 568
230 14 575 566 571 570
231 5 607 560 602 603
232 5 571 555 566 567
233 3 558 559 563 561
234 2 561 558 563 559
235 3 563 554 558 556
236 10 569 576 568 567
237 6 566 568 567 572
238 13 573 568 569 570
239 4 555 567 566 571
240 11 576 567 568 569
241 15 570 575 571 566
242 8 568 570 569 573
243 14 566 570 571 575
244 4 567 571 566 555
245 14 569 571 570 574
246 10 514 521 513 512
247 2 556 563 558 554
248 1 554 556 558 563
249 1 559 561 563 558
250 15 662 665 661 660
251 12 661 664 660 659
252 4 646 658 657 662
253 11 667 658 659 660
254 7 659 663 658 657
255 8 659 661 660 664
256 14 657 661 662 666
257 9 658 660 659 667
258 14 665 660 661 662
259 6 657 659 658 663
260 13 664 659 660 661
261 10 660 667 659 658
262 12 479 482 478 477
263 10 478 485 477 476
264 4 512 516 511 469
265 14 514 516 515 519
266 8 517 511 512 513
267 14 520 511 516 515
268 4 469 512 511 516
269 11 521 512 513 514
270 7 477 481 476 475
271 15 515 520 516 511
272 5 516 469 511 512
273 5 480 464 475 476
274 8 477 479 478 482
275 14 475 479 480 484
276 15 480 483 479 478
277 15 479 484 480 475
278 6 475 477 476 481
279 13 482 477 478 479
280 4 464 476 475 480
281 11 485 476 477 478
282 9 476 478 477 485
283 14 483 478 479 480
284 8 481 475 476 477
285 14 484 475 480 479
286 4 476 480 475 464
287 14 478 480 479 483
288 3 472 463 467 465
289 3 467 468 472 470
290 1 468 470 472 467
291 2 465 472 467 463
292 2 470 467 472 468
293 1 463 465 467 472
294 7 513 517 512 511
295 15 424 429 425 420
296 5 425 378 420 421
297 8 426 420 421 422
298 14 429 420 425 424
299 2 379 376 381 377
300 5 389 373 384 385
301 2 374 381 376 372
302 4 421 425 420 378
303 14 423 425 424 428
304 15 425 428 424 423
305 8 422 424 423 427
306 14 420 424 425 429
307 9 421 423 422 430
308 14 428 423 424 425
309 1 377 379 381 376
310 3 376 377 381 379
311 12 424 427 423 422
312 4 378 421 420 425
313 11 430 421 422 423
314 6 420 422 421 426
315 13 427 422 423 424
316 10 423 430 422 421
317 7 422 426 421 420
318 15 334 337 333 332
319 8 331 333 332 336
320 14 329 333 334 338
321 12 333 336 332 331
322 9 330 332 331 339
323 14 337 332 333 334
324 15 333 338 334 329
325 4 330 334 329 287
326 14 332 334 333 337
327 8 335 329 330 331
328 14 338 329 334 333
329 6 329 331 330 335
330 13 336 331 332 333
331 4 287 330 329 334
332 11 339 330 331 332
333 5 334 287 329 330
334 3 285 286 290 288
335 2 283 290 285 281
336 7 386 390 385 384
337 1 372 374 376 381
338 3 381 372 376 374
339 4 373 385 384 389
340 11 394 385 386 387
341 8 390 384 385 386
342 14 393 384 389 388
343 1 286 288 290 285
344 10 387 394 386 385
345 6 384 386 385 390
346 13 391 386 387 388
347 9 385 387 386 394
348 14 392 387 388 389
349 12 388 391 387 386
350 4 385 389 384 373
351 14 387 389 388 392
352 8 386 388 387 391
353 14 384 388 389 393
354 15 389 392 388 387
355 15 388 393 389 384
356 10 296 303 295 294
357 12 297 300 296 295
358 9 294 296 295 303
359 14 301 296 297 298
360 7 295 299 294 293
361 6 293 295 294 299
362 13 300 295 296 297
363 4 282 294 293 298
364 11 303 294 295 296
365 15 298 301 297 296
366 10 332 339 331 330
367 7 331 335 330 329
368 8 295 297 296 300
369 14 293 297 298 302
370 4 294 298 293 282
371 14 296 298 297 301
372 8 299 293 294 295
373 14 302 293 298 297
374 15 297 302 298 293
375 5 298 282 293 294
376 10 241 248 240 239
377 3 290 281 285 283
378 2 288 285 290 286
379 7 240 244 239 238
380 4 196 239 238 243
381 11 248 239 240 241
382 6 238 240 239 244
383 13 245 240 241 242
384 9 239 241 240 248
385 14 246 241 242 243
386 1 281 283 285 290
387 12 242 245 241 240
388 9 148 150 149 157
389 14 155 150 151 152
390 8 149 151 150 154
391 14 147 151 152 156
392 12 151 154 150 149
393 15 152 155 151 150
394 15 116 119 115 114
395 4 148 152 147 105
396 14 150 152 151 155
397 8 153 147 148 149
398 14 156 147 152 151
399 10 150 157 149 148
400 4 105 148 147 152
401 11 157 148 149 150
402 6 147 149 148 153
403 13 154 149 150 151
404 7 149 153 148 147
405 15 115 120 116 111
406 1 190 192 194 199
407 1 195 197 199 194
408 2 197 194 199 195
409 7 204 208 203 202
410 4 191 203 202 207
411 11 212 203 204 205
412 10 205 212 204 203
413 6 202 204 203 208
414 13 209 204 205 206
415 9 203 205 204 212
416 14 210 205 206 207
417 8 204 206 205 209
418 14 202 206 207 211
419 12 206 209 205 204
420 3 199 190 194 192
421 2 192 199 194 190
422 5 243 196 238 239
423 5 207 191 202 203
424 8 244 238 239 240
425 14 247 238 243 242
426 4 239 243 238 196
427 14 241 243 242 246
428 8 240 242 241 245
429 14 238 242 243 247
430 15 242 247 243 238
431 8 208 202 203 204
432 14 211 202 207 206
433 15 206 211 207 202
434 4 203 207 202 191
435 14 205 207 206 210
436 3 194 195 199 197
437 15 243 246 242 241
438 6 111 113 112 117
439 13 118 113 114 115
440 10 114 121 113 112
441 12 115 118 114 113
442 9 112 114 113 121
443 14 119 114 115 116
444 8 113 115 114 118
445 14 111 115 116 120
446 15 151 156 152 147
447 4 100 112 111 116
448 11 121 112 113 114
449 7 113 117 112 111
450 5 152 105 147 148
451 3 103 104 108 106
452 8 117 111 112 113
453 14 120 111 116 115
454 3 108 99 103 101
455 5 116 100 111 112
456 4 112 116 111 100
457 14 114 116 115 119
458 1 99 101 103 108
459 2 106 103 108 104
460 2 101 108 103 99
461 1 104 106 108 103
462 15 207 210 206 205
463 1 13 15 17 12
464 1 8 10 12 17
465 2 10 17 12 8
466 2 15 12 17 13
467 3 12 13 17 15
468 15 24 29 25 20
469 3 17 8 12 10
470 4 9 21 20 25
471 11 30 21 22 23
472 4 21 25 20 9
473 14 23 25 24 28
474 8 26 20 21 22
475 14 29 20 25 24
476 5 25 9 20 21
477 5 61 14 56 57
478 6 20 22 21 26
479 13 27 22 23 24
480 7 22 26 21 20
481 15 60 65 61 56
482 8 62 56 57 58
483 14 65 56 61 60
484 7 58 62 57 56
485 12 60 63 59 58
486 9 57 59 58 66
487 14 64 59 60 61
488 8 58 60 59 63
489 14 56 60 61 65
490 15 61 64 60 59
491 10 59 66 58 57
492 6 56 58 57 62
493 13 63 58 59 60
494 4 57 61 56 14
495 14 59 61 60 64
496 4 14 57 56 61
497 11 66 57 58 59
498 10 23 30 22 21
499 9 21 23 22 30
500 14 28 23 24 25
501 15 25 28 24 23
502 8 22 24 23 27
503 14 20 24 25 29
504 12 24 27 23 22
